# Supplementary material for: Achieving Robust Cholesteric Liquid Crystal Polymer Networks with High Luminescence Dissymmetry Factor
Source: Research Square preprint supplement (doi:10.21203/rs.3.rs-7436711/v1), 2025-09-17
Supplement: Supplementary file 1 [file 335eb7112f8c850565a62db2.xlsx]

## Sheet: Sheet1
CPL					CD
	(S-M)0.01-(FC6)0.98-(GDMD)0.01-0s	(S-M)0.01-(FC6)0.98-(GDMD)0.01-60s	(R-M)0.01-(FC6)0.98-(GDMD)0.01-0s	(R-M)0.01-(FC6)0.98-(GDMD)0.01-60s		(S-M)0.01-(FC6)0.98-(GDMD)0.01-0s	(S-M)0.01-(FC6)0.98-(GDMD)0.01-60s	(R-M)0.01-(FC6)0.98-(GDMD)0.01-0s	(R-M)0.01-(FC6)0.98-(GDMD)0.01-60s
700	3.18678	1.44829	-1.16167	-1.43182	700	0.00363	0.0036	0.00565	0.00503
699	2.93896	1.61021	-1.29194	-1.22874	699	0.00364	0.00366	0.00555	0.00506
698	2.69676	2.19753	-1.72795	-1.44061	698	0.00365	0.00365	0.00558	0.0051
697	3.06266	2.08978	-2.16345	-1.63848	697	0.0036	0.00361	0.00561	0.00513
696	3.29877	1.53618	-1.97186	-1.67957	696	0.0036	0.00365	0.00574	0.00509
695	3.38639	1.36339	-2.27847	-1.45188	695	0.00355	0.00366	0.0057	0.00516
694	3.32551	1.20027	-2.12039	-1.38489	694	0.00363	0.00369	0.00578	0.00514
693	3.04521	1.42331	-1.93024	-1.36057	693	0.00368	0.0037	0.00569	0.00507
692	2.88645	1.3623	-1.86987	-1.42531	692	0.0037	0.00371	0.00566	0.0051
691	3.05502	1.09645	-1.28665	-0.8241	691	0.00381	0.00377	0.00571	0.00507
690	3.14629	1.29915	-1.58018	-1.56791	690	0.00381	0.00375	0.00566	0.00507
689	2.99215	1.71476	-1.75255	-1.65282	689	0.00374	0.00372	0.00566	0.00508
688	3.08064	1.74393	-2.6709	-1.88794	688	0.00382	0.00371	0.00562	0.00518
687	3.24478	1.81863	-2.84002	-2.14155	687	0.00373	0.00366	0.00562	0.00529
686	3.54683	1.76592	-2.49491	-2.73444	686	0.00384	0.00364	0.00567	0.00527
685	3.73643	1.7362	-2.24877	-2.58381	685	0.00377	0.00363	0.00574	0.00532
684	4.12645	1.8959	-2.58814	-2.52488	684	0.00368	0.00363	0.00568	0.00526
683	4.40413	1.86611	-2.06427	-1.87828	683	0.00374	0.00362	0.00562	0.00531
682	4.63622	1.76618	-2.02684	-1.95612	682	0.00366	0.00363	0.00565	0.00534
681	4.69339	2.06551	-2.24302	-2.8426	681	0.00383	0.00369	0.00583	0.0054
680	4.29956	2.31689	-2.39498	-3.34734	680	0.00381	0.00375	0.00581	0.00531
679	4.28976	2.30342	-2.62844	-3.36033	679	0.00397	0.00375	0.00585	0.00538
678	4.19906	2.35462	-2.48429	-3.11118	678	0.004	0.00373	0.00576	0.00538
677	4.15512	2.6524	-2.17949	-2.67457	677	0.00394	0.00377	0.00574	0.00544
676	4.435	2.79701	-2.02939	-2.79622	676	0.00383	0.00374	0.00576	0.00539
675	4.5494	2.7758	-2.05943	-3.27568	675	0.00379	0.00377	0.0059	0.00542
674	4.71054	2.70601	-2.51808	-3.03651	674	0.00389	0.00377	0.00595	0.00538
673	4.88796	2.55708	-2.5673	-2.68322	673	0.00385	0.00378	0.00594	0.00545
672	5.01456	2.52345	-3.38332	-2.96537	672	0.00401	0.00374	0.0059	0.00553
671	5.67269	3.08077	-3.13534	-4.01068	671	0.00403	0.00378	0.00583	0.00559
670	5.72668	2.93838	-3.38482	-4.19022	670	0.00411	0.00384	0.00576	0.00558
669	6.0865	2.71287	-3.08831	-4.25473	669	0.00404	0.00388	0.00585	0.00551
668	6.1076	3.01848	-3.40451	-4.2765	668	0.00405	0.00386	0.00588	0.00552
667	6.02484	3.33878	-3.8459	-4.44595	667	0.00415	0.0039	0.00597	0.00559
666	6.15744	3.54568	-4.24773	-4.04411	666	0.00416	0.00394	0.00603	0.00556
665	6.49719	3.55372	-3.65234	-4.01307	665	0.00423	0.00398	0.00602	0.0056
664	6.51838	3.20203	-3.95561	-4.18717	664	0.0043	0.00396	0.00599	0.00562
663	6.61931	3.52803	-3.97819	-4.55081	663	0.00424	0.00393	0.00603	0.00567
662	6.70162	3.67551	-4.42828	-4.68563	662	0.00423	0.00395	0.00601	0.00568
661	6.85366	3.66208	-4.65453	-5.1472	661	0.00412	0.00402	0.00604	0.00568
660	7.27992	3.66544	-4.1691	-6.01837	660	0.00415	0.00398	0.00603	0.00567
659	7.22888	3.54944	-4.95402	-5.8696	659	0.00405	0.00402	0.00603	0.00567
658	7.40144	4.14334	-4.95828	-5.89541	658	0.00413	0.00408	0.00608	0.0057
657	7.39113	4.33108	-5.1838	-4.95321	657	0.00413	0.00416	0.00616	0.00582
656	7.37892	4.48832	-4.95901	-4.44828	656	0.00407	0.00417	0.00623	0.00587
655	7.61671	4.3701	-5.36185	-3.986	655	0.00419	0.00413	0.00627	0.00597
654	7.5671	4.64822	-5.68068	-4.95882	654	0.00431	0.00415	0.00622	0.00596
653	8.10757	5.03853	-5.95338	-5.60831	653	0.00427	0.00419	0.00617	0.00595
652	8.22761	4.92268	-6.41756	-6.39109	652	0.00441	0.00419	0.00615	0.00588
651	8.78168	4.73009	-6.53195	-6.17919	651	0.00443	0.00417	0.00624	0.00593
650	9.04935	4.55841	-6.97958	-6.30961	650	0.00449	0.00422	0.00632	0.00604
649	8.92231	4.67308	-6.24715	-6.06086	649	0.00447	0.00426	0.00639	0.00617
648	9.16368	4.77179	-5.88797	-5.74914	648	0.00452	0.00426	0.00633	0.00627
647	9.38538	4.84475	-6.58128	-5.93753	647	0.00445	0.00429	0.00634	0.00625
646	9.93326	4.95005	-7.04056	-6.62828	646	0.00447	0.00429	0.00645	0.00616
645	10.4814	5.15623	-7.7146	-7.21726	645	0.00454	0.00433	0.00651	0.00611
644	10.4722	5.28867	-8.09292	-7.65472	644	0.00457	0.00435	0.00652	0.00613
643	10.4097	5.85913	-8.80966	-7.93207	643	0.00466	0.0043	0.00646	0.00623
642	10.2929	5.85796	-8.77596	-8.51827	642	0.00463	0.00432	0.00657	0.00621
641	10.371	5.72322	-8.21769	-9.02402	641	0.00473	0.00437	0.00665	0.00618
640	10.8117	5.72442	-8.1488	-8.52348	640	0.00478	0.00434	0.00682	0.00627
639	11.1748	5.5001	-8.53557	-8.22643	639	0.00489	0.00435	0.0068	0.00629
638	11.2772	5.86839	-9.38744	-9.10578	638	0.00492	0.00439	0.00685	0.00641
637	11.4824	6.04974	-9.96883	-9.38576	637	0.00493	0.0044	0.00676	0.00644
636	12.0716	6.27476	-10.1969	-9.61532	636	0.005	0.00443	0.00676	0.00647
635	12.6792	6.76549	-10.3877	-9.66558	635	0.00497	0.00442	0.00676	0.00651
634	13.3445	7.08401	-10.0875	-10.2252	634	0.00497	0.00441	0.00685	0.00652
633	13.1262	7.33625	-10.5462	-10.6112	633	0.00492	0.00448	0.00683	0.00663
632	13.1545	7.98024	-10.3071	-10.567	632	0.00498	0.00448	0.00697	0.00669
631	13.6597	8.31243	-9.9264	-10.4545	631	0.00497	0.00449	0.00683	0.00675
630	14.1893	8.50304	-10.2928	-10.3761	630	0.00499	0.00454	0.00695	0.00672
629	14.5868	8.26982	-10.7714	-11.0377	629	0.00504	0.00458	0.007	0.00676
628	14.7321	8.60932	-11.8533	-11.8735	628	0.00518	0.00465	0.00711	0.00671
627	15.0775	8.59607	-12.2095	-11.9676	627	0.00526	0.00468	0.0071	0.00674
626	15.3018	8.97394	-12.8635	-12.271	626	0.0053	0.00472	0.00708	0.00675
625	15.9346	8.89694	-13.7821	-12.2154	625	0.00533	0.00468	0.00712	0.00686
624	16.5875	9.39113	-14.8526	-12.0881	624	0.00545	0.00471	0.00716	0.00693
623	16.9191	10.1219	-14.9844	-12.8399	623	0.00558	0.0047	0.00731	0.00704
622	17.4187	10.3486	-14.6238	-13.9376	622	0.00552	0.00472	0.00743	0.00713
621	17.3246	10.2948	-14.6554	-14.3638	621	0.00549	0.00476	0.00756	0.00715
620	18.1854	10.6529	-15.1261	-14.905	620	0.00543	0.00477	0.00759	0.00721
619	18.7302	11.0785	-15.0067	-15.1421	619	0.00554	0.00486	0.00756	0.00717
618	19.4097	11.5281	-15.6387	-15.8471	618	0.0057	0.00491	0.00755	0.00727
617	19.7749	11.7625	-16.0418	-15.7452	617	0.0058	0.00499	0.00758	0.00738
616	19.8601	11.9896	-17.0414	-16.7402	616	0.00587	0.00502	0.00765	0.00753
615	20.4758	12.471	-17.1877	-16.6045	615	0.00598	0.00508	0.00764	0.00765
614	21.3385	12.5721	-17.575	-17.2816	614	0.00594	0.00515	0.00775	0.00766
613	22.1333	13.2051	-17.808	-17.5466	613	0.00596	0.0052	0.00786	0.00761
612	23.0099	12.7865	-18.494	-18.2134	612	0.00609	0.00523	0.00787	0.00765
611	23.9709	12.8059	-19.8386	-18.9051	611	0.00613	0.00525	0.00798	0.00768
610	24.695	12.7619	-20.5918	-19.4325	610	0.00627	0.00531	0.00798	0.00779
609	25.2617	13.3789	-21.4148	-19.7284	609	0.00629	0.00537	0.00791	0.00789
608	24.9272	13.7585	-21.8504	-20.3508	608	0.00623	0.0054	0.00797	0.00801
607	25.3952	14.5414	-22.153	-21.6069	607	0.00637	0.00543	0.00798	0.00802
606	25.7602	15.4497	-23.3836	-22.1677	606	0.00655	0.00547	0.0082	0.00811
605	26.8745	15.7635	-23.7625	-22.6353	605	0.00652	0.00553	0.0083	0.00819
604	27.7607	16.5852	-24.6241	-23.0697	604	0.0065	0.00559	0.00846	0.00827
603	28.9118	16.987	-25.0804	-23.9329	603	0.00647	0.0056	0.00856	0.00834
602	29.0255	17.7731	-25.2198	-25.1988	602	0.0066	0.0057	0.00869	0.00847
601	29.9154	17.7722	-24.7737	-24.7283	601	0.00689	0.00572	0.00886	0.0086
600	30.1291	18.0588	-25.6226	-25.9323	600	0.0071	0.00577	0.00891	0.00869
599	31.3571	18.4477	-25.96	-26.948	599	0.00713	0.00582	0.00889	0.00874
598	32.2223	19.5359	-27.6779	-27.6639	598	0.00717	0.00585	0.00893	0.0088
597	32.5954	20.0761	-28.2079	-28.5009	597	0.00729	0.00589	0.00898	0.00891
596	33.0533	20.7335	-29.8066	-29.617	596	0.00737	0.00596	0.00927	0.00904
595	34.1537	20.949	-32.2458	-29.6643	595	0.00745	0.00603	0.00946	0.00911
594	35.1539	21.6556	-32.6976	-30.424	594	0.00736	0.00611	0.00959	0.00923
593	36.9884	22.5171	-33.6682	-30.9646	593	0.00749	0.00619	0.00963	0.00935
592	37.8006	22.7437	-34.4069	-32.5361	592	0.00761	0.00626	0.00961	0.00947
591	39.8323	22.9026	-35.4467	-34.5374	591	0.00778	0.00636	0.00963	0.00961
590	40.8326	23.006	-36.5469	-35.4279	590	0.00804	0.00636	0.00969	0.0097
589	42.2777	23.6286	-37.5958	-35.4257	589	0.00814	0.00639	0.00973	0.00975
588	44.0138	24.4461	-37.7575	-35.9378	588	0.00839	0.00645	0.0098	0.00989
587	44.8847	25.279	-38.4035	-36.6513	587	0.00846	0.00651	0.01002	0.01012
586	45.8142	26.3751	-39.6058	-38.3117	586	0.0087	0.00652	0.01011	0.01021
585	46.6444	26.6493	-41.326	-38.6184	585	0.00873	0.0066	0.01024	0.01035
584	48.728	27.7611	-42.8621	-40.2609	584	0.00891	0.00671	0.01029	0.01034
583	49.9602	29.63	-44.1987	-41.4594	583	0.00901	0.00683	0.01047	0.01044
582	51.3701	30.9075	-45.2523	-43.9641	582	0.00919	0.00696	0.01067	0.01064
581	52.9511	31.8522	-47.7332	-44.272	581	0.00939	0.00707	0.01091	0.01079
580	54.166	32.4476	-48.6912	-45.4789	580	0.00943	0.00724	0.01118	0.01111
579	56.3573	34.1176	-51.842	-46.3278	579	0.00945	0.00735	0.01125	0.01131
578	57.3415	35.2548	-52.7833	-47.9692	578	0.00956	0.0075	0.01142	0.01157
577	59.4479	36.4234	-54.0609	-49.256	577	0.00964	0.00758	0.01162	0.01169
576	60.3424	37.0257	-55.0555	-50.1051	576	0.00996	0.00772	0.01179	0.01175
575	61.8302	38.2781	-56.9881	-51.2341	575	0.01021	0.00781	0.01202	0.01189
574	63.6779	38.9868	-59.0002	-53.7458	574	0.01038	0.0079	0.01225	0.01209
573	65.794	40.5798	-61.4734	-56.0119	573	0.01058	0.00802	0.01247	0.01243
572	68.9974	40.9726	-63.1539	-57.4475	572	0.0108	0.00811	0.01274	0.0126
571	71.0339	42.7761	-64.7783	-59.0782	571	0.01094	0.00828	0.01279	0.0127
570	72.9428	43.2674	-66.8241	-60.5293	570	0.01121	0.00838	0.01294	0.0128
569	73.2596	44.8416	-68.0666	-62.8305	569	0.01145	0.00858	0.01303	0.013
568	74.786	46.3039	-70.6918	-65.3975	568	0.0117	0.00868	0.01329	0.01335
567	76.939	47.9193	-71.826	-67.6354	567	0.01196	0.00885	0.01356	0.01359
566	79.725	49.3031	-73.567	-70.3881	566	0.01217	0.00901	0.01378	0.01377
565	82.3962	51.952	-75.4463	-72.5556	565	0.0124	0.00918	0.01403	0.01392
564	84.5869	53.2531	-78.5072	-74.6395	564	0.0126	0.00932	0.01432	0.01414
563	87.5594	56.0424	-82.0144	-75.4716	563	0.01281	0.00948	0.01456	0.01435
562	90.2089	57.9255	-84.6981	-75.6687	562	0.013	0.00965	0.01472	0.01469
561	93.3422	59.5454	-88.0735	-78.3729	561	0.01316	0.00986	0.01493	0.01495
560	95.9145	61.3649	-90.0413	-81.2176	560	0.01354	0.00998	0.01526	0.01526
559	98.6531	61.9743	-92.4372	-86.5802	559	0.01373	0.01019	0.01569	0.01556
558	101.395	64.1016	-94.577	-87.2735	558	0.01405	0.0104	0.01622	0.01582
557	105.05	65.6539	-97.3013	-90.2752	557	0.01445	0.01057	0.01646	0.01621
556	108.683	67.1096	-100.108	-92.1313	556	0.01488	0.01078	0.01677	0.01656
555	111.114	68.6581	-103.466	-95.5557	555	0.01516	0.01101	0.01703	0.01693
554	114.258	70.2221	-106.186	-98.1556	554	0.01543	0.01129	0.01728	0.01724
553	118.066	73.4657	-110.451	-100.712	553	0.01567	0.0115	0.01757	0.01747
552	121.079	76.2185	-113.583	-105.172	552	0.01619	0.01168	0.01794	0.01777
551	125.137	79.0236	-117.402	-108.53	551	0.01654	0.01193	0.01824	0.01818
550	129.144	81.4944	-120.79	-112.333	550	0.01692	0.0122	0.01863	0.01857
549	133.77	84.9972	-125.293	-114.538	549	0.01707	0.01241	0.01899	0.01892
548	137.771	87.7701	-128.263	-116.913	548	0.01738	0.01266	0.01927	0.01929
547	142.501	90.6529	-132.952	-119.75	547	0.01784	0.0129	0.01964	0.01983
546	147.161	92.733	-136.756	-123.396	546	0.01819	0.01318	0.02016	0.02022
545	150.295	95.9582	-140.57	-127.975	545	0.01872	0.01354	0.02068	0.02067
544	154.724	99.0828	-144.841	-133.13	544	0.01918	0.01378	0.02131	0.021
543	160.62	102.556	-150.148	-137.36	543	0.01984	0.0141	0.02168	0.02142
542	165.14	106.246	-155.945	-140.363	542	0.02039	0.01442	0.02204	0.02174
541	170.269	110.447	-161.139	-144.897	541	0.02081	0.01474	0.02256	0.02231
540	176.015	113.911	-165.87	-150.127	540	0.02127	0.01505	0.02304	0.02274
539	180.937	118.766	-170.693	-156.184	539	0.02184	0.0154	0.02357	0.02339
538	186.605	122.524	-177.499	-160.777	538	0.02235	0.01577	0.02395	0.02403
537	191.752	126.363	-182.395	-164.866	537	0.0229	0.01613	0.02454	0.02445
536	197.459	130.385	-187.984	-169.503	536	0.02359	0.01654	0.02514	0.02502
535	204.224	135.274	-194.827	-176.517	535	0.02416	0.01699	0.02583	0.02556
534	210.786	139.776	-200.712	-182.848	534	0.02484	0.01751	0.02645	0.02615
533	219.006	144.55	-206.698	-188.608	533	0.02545	0.01801	0.0272	0.02675
532	226.097	148.994	-211.835	-193.553	532	0.02617	0.01844	0.02788	0.02741
531	234.212	154.755	-220.116	-200.253	531	0.027	0.01899	0.02862	0.028
530	241.716	160.787	-228.637	-205.951	530	0.02773	0.01952	0.02918	0.02872
529	249.784	165.83	-236.242	-212.17	529	0.02842	0.02002	0.02986	0.02957
528	257.983	170.95	-244.783	-216.758	528	0.02915	0.02053	0.03054	0.03024
527	265.923	176.098	-253.752	-227.007	527	0.02993	0.02106	0.03136	0.03105
526	273.087	182.221	-261.427	-235.835	526	0.03074	0.02156	0.03216	0.03177
525	280.595	188.214	-269.185	-243.964	525	0.03174	0.02211	0.03294	0.03269
524	289.453	194.77	-276.395	-252.398	524	0.03247	0.02271	0.03374	0.03349
523	297.967	201.205	-285.805	-259.99	523	0.03327	0.02325	0.03455	0.03438
522	308.41	207.934	-295.49	-267.826	522	0.03399	0.02384	0.03545	0.03509
521	317.432	216.336	-305.372	-275.245	521	0.03479	0.02448	0.03633	0.03597
520	328.593	223.98	-313.219	-283.138	520	0.03579	0.02514	0.03736	0.03686
519	338.474	233.083	-322.005	-291.264	519	0.03691	0.02594	0.03829	0.03778
518	350.374	240.757	-333.976	-301.256	518	0.03792	0.02672	0.03935	0.03889
517	362.036	249.297	-346.889	-311.771	517	0.03899	0.02742	0.04047	0.03989
516	373.871	258.769	-358.471	-319.117	516	0.04015	0.02822	0.04148	0.04082
515	386.764	266.571	-369.186	-328.517	515	0.04138	0.02906	0.04262	0.04182
514	397.648	276.62	-380.133	-340.715	514	0.04235	0.02992	0.04378	0.04292
513	410.439	284.972	-391.811	-351.391	513	0.0436	0.03077	0.04504	0.04379
512	424.005	295.051	-407.213	-364.492	512	0.0449	0.03164	0.04638	0.04495
511	438.721	306.619	-419.278	-376.792	511	0.04618	0.03256	0.04772	0.04611
510	452.103	317.876	-429.909	-387.447	510	0.04752	0.03357	0.04904	0.04733
509	466.647	329.671	-442.038	-398.544	509	0.04888	0.0346	0.05018	0.04859
508	480.468	343.068	-457.72	-410.697	508	0.05012	0.03563	0.05163	0.0501
507	494.33	355.361	-473.074	-421.738	507	0.05161	0.03676	0.05289	0.05143
506	510.847	371.384	-490.057	-436.382	506	0.05295	0.03801	0.05452	0.05276
505	528.549	384.921	-506.355	-451.083	505	0.05445	0.03916	0.05598	0.05434
504	545.815	398.538	-523.138	-465.943	504	0.05616	0.04043	0.05768	0.0559
503	558.039	412.201	-538.9	-478.099	503	0.05772	0.04177	0.05918	0.05738
502	575.138	426.546	-555.79	-491.792	502	0.0596	0.04314	0.06088	0.059
501	592.171	441.545	-573.428	-505.588	501	0.06111	0.04461	0.06256	0.06064
500	611.393	457.294	-589.5	-523.934	500	0.06276	0.04596	0.06432	0.06237
499	630.811	472.183	-611.479	-539.623	499	0.06462	0.04744	0.06612	0.06397
498	653.196	488.647	-628.869	-557.603	498	0.06675	0.04903	0.06802	0.06574
497	673.96	506.015	-649.348	-581.663	497	0.06874	0.05049	0.0699	0.06742
496	694.959	524.391	-666.706	-600.212	496	0.07069	0.05208	0.07181	0.06954
495	717.595	543.041	-688.689	-619.624	495	0.07303	0.05381	0.07388	0.07133
494	739.167	561.122	-710.704	-638.732	494	0.07527	0.05553	0.07596	0.07336
493	762.695	581.212	-734.224	-655.489	493	0.07734	0.05736	0.07838	0.07522
492	786.545	601.221	-757.456	-675.448	492	0.07949	0.05922	0.08062	0.07728
491	814.91	623.395	-782.532	-697.764	491	0.08207	0.06119	0.08325	0.07951
490	842.655	644.675	-809.11	-719.977	490	0.08455	0.06324	0.08569	0.08201
489	873.086	664.394	-833.443	-743.619	489	0.08753	0.06519	0.08812	0.08446
488	900.812	687.303	-859.03	-769.531	488	0.09031	0.06727	0.09075	0.08713
487	927.394	707.827	-886.741	-795.963	487	0.09308	0.06935	0.0936	0.08985
486	957.816	730.76	-916.271	-820.66	486	0.0958	0.07148	0.09644	0.09235
485	987.736	753.213	-947.033	-847.3	485	0.09871	0.07372	0.09926	0.09499
484	1017.03	777.311	-973.287	-871.708	484	0.10166	0.07589	0.10202	0.09768
483	1046.99	803.339	-1006.13	-901.043	483	0.10479	0.07838	0.10502	0.10055
482	1078.06	831.106	-1037.67	-924.511	482	0.10787	0.08091	0.10827	0.10329
481	1112.57	858.953	-1073.71	-955.485	481	0.11122	0.08347	0.11159	0.10652
480	1146.89	885.988	-1104.45	-986.108	480	0.11478	0.08611	0.11478	0.10963
479	1185	917.276	-1134.31	-1014.24	479	0.11855	0.08889	0.11821	0.11286
478	1224.16	947.988	-1168.37	-1044.19	478	0.12213	0.09183	0.12184	0.11618
477	1255.69	982.644	-1208.12	-1075.48	477	0.12527	0.09503	0.12561	0.11954
476	1291.71	1014.2	-1246.74	-1104.48	476	0.12894	0.09809	0.12909	0.12267
475	1327.36	1048.7	-1278.93	-1140.03	475	0.13281	0.10135	0.13253	0.12628
474	1365.63	1084.75	-1319.45	-1169.99	474	0.13674	0.10485	0.13648	0.1298
473	1400.45	1119.26	-1347.27	-1202.26	473	0.14027	0.10835	0.14	0.13309
472	1437.23	1154.8	-1381.98	-1235.88	472	0.14379	0.1117	0.14367	0.13651
471	1477.31	1192.16	-1419.83	-1273.69	471	0.14776	0.11542	0.14772	0.14009
470	1516.66	1231.62	-1457.4	-1304.01	470	0.15174	0.11931	0.15127	0.14337
469	1551.78	1273.18	-1498.82	-1337.25	469	0.15569	0.12327	0.15518	0.14696
468	1588.73	1313.17	-1536.68	-1368.4	468	0.15989	0.12732	0.15914	0.1506
467	1632.5	1352.58	-1579.9	-1408.36	467	0.16428	0.13137	0.16351	0.15484
466	1675.46	1393.14	-1621.17	-1444.66	466	0.16874	0.13562	0.16804	0.15872
465	1717.83	1437.49	-1662.9	-1482.36	465	0.17325	0.14007	0.1724	0.16292
464	1767.35	1477.98	-1706.94	-1526.72	464	0.17821	0.14421	0.17742	0.16772
463	1813.93	1520.71	-1752.02	-1565.91	463	0.18309	0.14869	0.18221	0.17212
462	1862.86	1567.02	-1788.76	-1607.96	462	0.18804	0.15317	0.18655	0.17643
461	1914.67	1611.96	-1833.79	-1640.05	461	0.19298	0.1579	0.19116	0.18049
460	1953.73	1661.03	-1882.21	-1679.01	460	0.19736	0.16297	0.19635	0.1853
459	2002.8	1707.5	-1935.47	-1714.32	459	0.20292	0.16785	0.20169	0.19
458	2051.29	1753.78	-1985.15	-1759.04	458	0.20883	0.17267	0.20728	0.19513
457	2115.05	1797.94	-2026.27	-1803.22	457	0.21556	0.17754	0.21263	0.20012
456	2169.38	1839.15	-2084.47	-1847.56	456	0.22137	0.18239	0.2186	0.20511
455	2226.02	1888.39	-2144.52	-1898.93	455	0.22747	0.18782	0.22505	0.21079
454	2279.44	1935.29	-2197.31	-1948.01	454	0.23335	0.19281	0.23074	0.21662
453	2335.47	1982.85	-2249.14	-1999.33	453	0.23913	0.1981	0.23705	0.22256
452	2404.45	2023.89	-2299.7	-2049.76	452	0.24605	0.20313	0.24326	0.22841
451	2463.65	2069.86	-2363.49	-2094.35	451	0.25253	0.20872	0.24997	0.23349
450	2529.02	2113.49	-2425.39	-2139.64	450	0.26032	0.21416	0.25659	0.23893
449	2576.92	2160.54	-2477.33	-2179.48	449	0.26637	0.21977	0.26263	0.24392
448	2629.13	2205	-2524.54	-2223.39	448	0.2724	0.22536	0.26823	0.24911
447	2682.62	2246.86	-2574.07	-2264.89	447	0.27884	0.23125	0.27502	0.25492
446	2741.04	2293.89	-2623.05	-2330.07	446	0.28576	0.23713	0.28144	0.26182
445	2807.25	2337.37	-2687.52	-2379.97	445	0.29336	0.24267	0.28882	0.26864
444	2874.66	2380.62	-2738.71	-2439.65	444	0.30079	0.24869	0.29599	0.2755
443	2933.68	2426.54	-2792.24	-2472.43	443	0.30783	0.25481	0.30216	0.28066
442	2977.65	2474.97	-2839.09	-2507.32	442	0.31366	0.26097	0.30847	0.28585
441	3027.02	2523.95	-2889.62	-2540.46	441	0.32036	0.26767	0.31478	0.29043
440	3073.83	2573.18	-2936.18	-2588.43	440	0.32637	0.27451	0.32085	0.29634
439	3127.24	2624.83	-2972.56	-2626.42	439	0.33279	0.28166	0.32573	0.30146
438	3171.65	2681.17	-3014.44	-2672.26	438	0.33899	0.28973	0.33239	0.30753
437	3211.71	2738.02	-3051.31	-2704.1	437	0.34457	0.29739	0.33799	0.31245
436	3248.77	2794.77	-3087.34	-2734.86	436	0.34973	0.30491	0.34338	0.31707
435	3286.61	2844.2	-3122.07	-2755.36	435	0.3554	0.31276	0.34858	0.32102
434	3320.22	2890.58	-3164.52	-2783.14	434	0.36087	0.32026	0.35452	0.32518
433	3349.86	2933.86	-3185.77	-2812.31	433	0.36556	0.32746	0.35887	0.33009
432	3384.67	2976.14	-3203.57	-2844.15	432	0.37073	0.33467	0.36253	0.33495
431	3411.67	3018.63	-3233.84	-2868.05	431	0.37496	0.34199	0.36671	0.33909
430	3448.39	3044.56	-3265.92	-2892.81	430	0.38035	0.34881	0.37247	0.34379
429	3464.71	3069.65	-3291.63	-2916.74	429	0.38437	0.3553	0.3772	0.3482
428	3488.67	3094.46	-3311.52	-2924.38	428	0.38843	0.36128	0.38145	0.35083
427	3498.92	3123.62	-3314.76	-2924.88	427	0.39193	0.36697	0.38431	0.3533
426	3523.14	3136.17	-3319.21	-2936.03	426	0.39614	0.37165	0.38778	0.35667
425	3522.44	3143.66	-3316.28	-2935.32	425	0.39878	0.37577	0.39068	0.36012
424	3533.5	3142.42	-3322.29	-2942.78	424	0.40225	0.37928	0.39441	0.36352
423	3529.2	3143.25	-3330.16	-2942.56	423	0.40441	0.38226	0.39754	0.3662
422	3522.26	3135.07	-3336.76	-2947.35	422	0.40634	0.38476	0.40033	0.36824
421	3512.43	3122.81	-3324.81	-2941.38	421	0.40753	0.38705	0.40132	0.36873
420	3495.48	3098.97	-3308.21	-2923.64	420	0.40894	0.38832	0.40206	0.36924
419	3485.84	3076.46	-3281.79	-2913.44	419	0.41011	0.38965	0.40129	0.37027
418	3461.36	3054.48	-3265.86	-2890.3	418	0.41048	0.39066	0.40234	0.37085
417	3431.58	3024.78	-3238.71	-2871.52	417	0.40909	0.39109	0.40262	0.37102
416	3392.29	2987.16	-3201.7	-2831.55	416	0.40747	0.39097	0.40165	0.36879
415	3342.6	2939.82	-3148.48	-2797.04	415	0.40464	0.38991	0.39811	0.36654
414	3292.91	2882.38	-3100.21	-2767.56	414	0.4022	0.38798	0.39527	0.36566
413	3234.22	2818.42	-3058.18	-2729.01	413	0.39802	0.38517	0.3922	0.36415
412	3176.98	2740.21	-2999.59	-2687.29	412	0.3939	0.38128	0.3883	0.36156
411	3112.37	2649.94	-2936.82	-2639.58	411	0.38877	0.37648	0.38407	0.35814
410	3046.39	2562.49	-2879.61	-2588.39	410	0.38352	0.37144	0.379	0.35377
409	2977.69	2471.7	-2802.79	-2534.23	409	0.37787	0.36524	0.37301	0.34876
408	2904.81	2373.92	-2731.34	-2462.71	408	0.37143	0.35824	0.36706	0.34257
407	2826.98	2275.71	-2658.75	-2396.25	407	0.36383	0.35107	0.3606	0.33695
406	2752.17	2177.7	-2575.14	-2329.03	406	0.35638	0.34325	0.35206	0.33002
405	2662.92	2071.02	-2490.36	-2249.91	405	0.3481	0.3344	0.34334	0.32279
404	2561.73	1955.74	-2407.17	-2175.21	404	0.33821	0.32345	0.33417	0.31444
403	2455.2	1841.53	-2320.08	-2093.62	403	0.32765	0.31238	0.32573	0.3064
402	2349.7	1731.99	-2228.69	-2018.47	402	0.31667	0.30122	0.31606	0.29823
401	2254.09	1620.66	-2132.38	-1938.59	401	0.30646	0.28903	0.30592	0.28938
400	2147.47	1504.58	-2028.32	-1847.23	400	0.29514	0.27566	0.29445	0.27899
399	2035.73	1384.67	-1931.92	-1752.63	399	0.2828	0.26134	0.28337	0.26823
398	1921.28	1270.09	-1818.89	-1658.58	398	0.27035	0.24672	0.27057	0.25735
397	1807.65	1158.33	-1702.18	-1573.36	397	0.2576	0.23252	0.25786	0.24653
396	1694.91	1051.59	-1594.89	-1476.46	396	0.24497	0.21756	0.24546	0.23435
395	1580.9	943.266	-1489.31	-1385.75	395	0.23231	0.20189	0.23314	0.22393
394	1477.45	835.114	-1387.62	-1291.44	394	0.22016	0.18583	0.22065	0.21301
393	1380.19	732.446	-1293.22	-1204.42	393	0.20823	0.16946	0.20908	0.20229
392	1280.41	628.976	-1198.92	-1126.3	392	0.19629	0.1523	0.1977	0.19153
391	1184.08	533.411	-1107.7	-1049.61	391	0.18424	0.13604	0.18575	0.18114
390	1083.16	445.019	-1017.51	-977.413	390	0.17209	0.11948	0.17389	0.17071
389	990.141	366.091	-935.552	-897.727	389	0.16028	0.10407	0.16283	0.16013
388	898.092	293.055	-853.576	-826.434	388	0.1486	0.08946	0.15166	0.15042
387	810.332	232.032	-768.675	-754.213	387	0.13707	0.0755	0.14057	0.14019
386	728.233	177.742	-690.84	-685.495	386	0.12655	0.06322	0.12975	0.13055
385	652.72	130.742	-619.565	-615.878	385	0.11584	0.05187	0.11926	0.12059
384	570.957	93.5636	-545.63	-547.018	384	0.10476	0.04226	0.10838	0.11049
383	491.94	66.1563	-473.808	-476.278	383	0.09307	0.0342	0.09749	0.1001
382	416.476	45.0925	-402.923	-414.837	382	0.08225	0.02748	0.08728	0.09019
381	348.205	29.4158	-339.913	-356.499	381	0.07198	0.02211	0.07694	0.08059
380	286.346	19.1997	-276.799	-300.025	380	0.06228	0.01774	0.06715	0.07147
379	228.971	12.4804	-223	-245.915	379	0.05319	0.01431	0.05774	0.06221
378	179.117	8.61951	-173.331	-197.463	378	0.04486	0.01162	0.04908	0.05358
377	135.927	5.18052	-132.203	-153.775	377	0.03738	0.00951	0.04134	0.04543
376	100.401	3.32007	-95.1534	-116.745	376	0.03063	0.00795	0.03402	0.03823
375	71.584	2.09595	-68.1899	-85.8627	375	0.02488	0.00681	0.02813	0.03167
374	49.7605	1.6314	-47.9114	-62.3826	374	0.02011	0.00594	0.02313	0.02619
373	34.0105	1.24431	-32.8696	-43.4255	373	0.01619	0.00533	0.01919	0.02166
372	22.8374	0.99919	-20.7288	-29.2123	372	0.01308	0.00482	0.01577	0.01785
371	15.6422	1.10881	-12.9589	-18.7669	371	0.01063	0.00444	0.01304	0.01477
370	11.0887	1.22749	-8.11168	-12.8733	370	0.00879	0.00421	0.01109	0.0123
369	7.45399	0.87122	-4.94871	-8.78011	369	0.00734	0.00405	0.00966	0.01046
368	5.27389	1.07165	-2.63407	-6.4083	368	0.0062	0.00392	0.0085	0.009
367	3.31225	1.05259	-1.7457	-4.05621	367	0.00547	0.00379	0.00769	0.00785
366	2.75799	0.71315	-1.14056	-2.8975	366	0.00499	0.00374	0.007	0.00712
365	2.17277	0.47047	-0.60118	-1.72904	365	0.00453	0.00372	0.00666	0.00654
364	1.67918	0.12879	-0.48752	-0.33956	364	0.00432	0.00366	0.00626	0.00618
363	1.18174	0.09104	0.35686	0.24291	363	0.00407	0.00363	0.00608	0.00583
362	1.09773	0.32678	0.50525	0.44076	362	0.0038	0.00359	0.00587	0.00554
361	1.22732	0.20699	0.88545	0.36495	361	0.00371	0.00366	0.00585	0.00533
360	0.96952	0.23932	0.563	-0.2785	360	0.00358	0.00364	0.00576	0.00519
359	0.89999	0.43917	0.95596	-0.07534	359	0.00349	0.00366	0.00568	0.00519
358	0.71374	0.50187	0.04572	-0.20871	358	0.00345	0.00365	0.00562	0.00517
357	0.33009	0.7326	-0.23529	0.77833	357	0.00345	0.00369	0.00555	0.00511
356	0.41974	0.8914	-0.61938	0.81411	356	0.00353	0.00369	0.0055	0.00507
355	0.39968	0.7477	-0.1538	1.28838	355	0.00339	0.00363	0.00553	0.00503
354	0.67353	0.84657	0.18882	1.29528	354	0.00344	0.00364	0.00562	0.00513
353	1.15047	0.62526	0.89568	0.68952	353	0.00346	0.00366	0.00566	0.00517
352	1.16214	0.45957	0.64592	0.83098	352	0.00345	0.00366	0.00568	0.00515
351	0.92948	0.60104	0.53359	0.25608	351	0.00349	0.00369	0.00565	0.00511
350	0.22351	0.52972	0.07393	0.29137	350	0.00332	0.0037	0.00556	0.00515
