# Supplementary material for: Achieving Robust Cholesteric Liquid Crystal Polymer Networks with High Luminescence Dissymmetry Factor
Source: Research Square preprint supplement (doi:10.21203/rs.3.rs-7436711/v1), 2025-09-17
Supplement: Supplementary file 3 [file 5bea8b5c6944784973a3af22.xlsx]

## Sheet: Sheet1
CPL					CD
	(S-M)0.01-(FC1)0.99-90℃	(S-M)0.03-(FC1)0.97-90℃	(S-M)0.05-(FC1)0.95-95℃	(S-M)0.1-(FC1)0.9-95℃		(S-M)0.01-(FC1)0.99-90℃	(S-M)0.03-(FC1)0.97-90℃	(S-M)0.05-(FC1)0.95-95℃	(S-M)0.1-(FC1)0.9-95℃
700	0.04724	0.22636	0.95574	0.185	700	0.00696	0.00558	0.00492	0.00466
699.9	0.30189	0.26638	1.01261	-0.00209	699.9	0.00694	0.00556	0.00492	0.00464
699.8	0.38767	0.17889	0.90128	0.06699	699.8	0.00697	0.00555	0.00495	0.00464
699.7	0.70874	0.52378	0.67822	0.09172	699.7	0.00698	0.00554	0.00497	0.00465
699.6	0.9763	0.61115	0.67041	0.2143	699.6	0.00697	0.00554	0.00499	0.00465
699.5	1.00529	0.52473	0.78842	-0.00237	699.5	0.00698	0.00551	0.00495	0.00467
699.4	1.0993	0.356	0.91244	0.13413	699.4	0.00703	0.00556	0.00496	0.00466
699.3	1.17028	0.15979	1.06611	0.32064	699.3	0.00703	0.00554	0.00494	0.00465
699.2	1.36875	0.25342	0.95914	0.20541	699.2	0.00701	0.00558	0.00491	0.00468
699.1	1.4681	-0.14053	1.0338	0.30724	699.1	0.00702	0.00555	0.0049	0.00468
699	1.50554	-0.45458	0.82663	0.45603	699	0.00702	0.00555	0.0049	0.00469
698.9	1.35353	-0.49738	0.7825	0.57693	698.9	0.00702	0.00554	0.0049	0.0047
698.8	1.31337	-0.57185	0.73157	0.66575	698.8	0.00704	0.00555	0.00489	0.0047
698.7	1.22849	-0.7217	0.62794	0.67905	698.7	0.00702	0.00555	0.00494	0.00473
698.6	1.21047	-0.94908	0.81549	1.00191	698.6	0.00701	0.00551	0.00494	0.00476
698.5	0.99248	-0.82783	0.74584	0.76408	698.5	0.00702	0.00551	0.00492	0.0048
698.4	0.74204	-0.89041	0.5529	0.90426	698.4	0.00702	0.00553	0.00494	0.0048
698.3	0.8368	-0.67948	0.61025	0.94591	698.3	0.00702	0.00556	0.00495	0.00483
698.2	0.92196	-0.35943	0.5937	0.98274	698.2	0.00704	0.00553	0.00495	0.00481
698.1	1.12354	-0.61942	0.81477	0.86239	698.1	0.00704	0.00549	0.00497	0.00479
698	1.06006	-0.60957	0.76332	0.91487	698	0.00705	0.00549	0.00495	0.00481
697.9	1.22007	-0.80472	0.75677	1.07375	697.9	0.00707	0.0055	0.00496	0.00483
697.8	1.07854	-1.04325	0.84969	1.19231	697.8	0.00707	0.0055	0.00497	0.00484
697.7	0.90436	-1.08863	0.75789	1.23618	697.7	0.00711	0.00552	0.005	0.00486
697.6	0.8543	-1.07953	0.52972	1.21682	697.6	0.00707	0.00553	0.005	0.00489
697.5	0.86743	-1.15656	0.27513	1.15822	697.5	0.00708	0.00548	0.00503	0.00491
697.4	1.11487	-1.5046	0.17323	1.19562	697.4	0.00707	0.0055	0.00505	0.00491
697.3	1.01526	-1.58825	0.19033	1.24871	697.3	0.00707	0.00554	0.00506	0.00491
697.2	1.16782	-1.67171	0.54337	1.29011	697.2	0.00709	0.00559	0.00507	0.00492
697.1	1.10258	-1.53647	0.40906	1.3108	697.1	0.00712	0.00557	0.00505	0.00494
697	1.00942	-1.58327	0.26648	1.42575	697	0.00716	0.00554	0.00505	0.00494
696.9	1.05616	-1.55574	0.25992	1.71289	696.9	0.00715	0.00555	0.00508	0.00496
696.8	1.02577	-1.41175	-0.08352	1.90562	696.8	0.0072	0.00555	0.00508	0.00496
696.7	0.84917	-1.4772	-0.20949	1.86102	696.7	0.0072	0.00557	0.00509	0.00498
696.6	0.87014	-1.59004	-0.19701	1.75333	696.6	0.00717	0.00557	0.00508	0.00498
696.5	0.75461	-1.54092	-0.36161	1.55558	696.5	0.00717	0.00551	0.00508	0.00499
696.4	0.55853	-1.28795	-0.26237	1.62361	696.4	0.00718	0.00551	0.00508	0.00496
696.3	0.7805	-1.25577	-0.23521	1.74008	696.3	0.00717	0.00556	0.00511	0.00496
696.2	0.45163	-1.49173	-0.27722	1.5369	696.2	0.00712	0.00549	0.00513	0.00497
696.1	0.4197	-1.33704	-0.15284	1.38494	696.1	0.00713	0.00552	0.00514	0.00499
696	0.25875	-1.17661	-0.0991	1.45064	696	0.00717	0.00554	0.00514	0.005
695.9	0.13005	-1.02614	-0.01324	1.79805	695.9	0.00713	0.00555	0.00516	0.00503
695.8	0.08234	-1.07076	0.38061	1.81654	695.8	0.00717	0.00556	0.00516	0.00503
695.7	0.12728	-0.8639	0.31091	1.77358	695.7	0.00718	0.00552	0.00516	0.00504
695.6	-0.03101	-0.73017	0.0483	1.93995	695.6	0.00717	0.0055	0.00518	0.005
695.5	0.15266	-0.7271	0.35445	1.8038	695.5	0.00719	0.00553	0.00516	0.00496
695.4	0.18965	-0.29247	0.12729	1.73857	695.4	0.00721	0.00555	0.00518	0.00495
695.3	0.51462	-0.38757	0.14733	1.81023	695.3	0.00722	0.00558	0.00523	0.00494
695.2	0.98556	-0.28751	0.31665	1.80867	695.2	0.00719	0.0056	0.00524	0.00493
695.1	0.92227	-0.21439	0.25144	1.51134	695.1	0.00723	0.00562	0.00527	0.00491
695	0.52835	-0.3373	0.41735	1.62666	695	0.00726	0.00563	0.00528	0.00492
694.9	0.68118	-0.18404	0.2572	1.64918	694.9	0.00729	0.00564	0.00528	0.00493
694.8	0.39198	-0.34855	0.27074	1.69184	694.8	0.00733	0.00561	0.00529	0.00491
694.7	0.37692	-0.27185	-0.01206	1.77339	694.7	0.00732	0.00562	0.0053	0.0049
694.6	0.16425	-0.03531	-0.09342	1.61843	694.6	0.00735	0.0056	0.00532	0.0049
694.5	0.41475	0.02932	-0.19718	1.69185	694.5	0.00733	0.00555	0.0053	0.00485
694.4	0.51621	0.07259	0.04641	1.51254	694.4	0.00733	0.0055	0.00528	0.00485
694.3	0.77026	0.31733	0.30468	1.44997	694.3	0.00734	0.00553	0.00529	0.00484
694.2	0.69658	0.81314	0.17378	1.43847	694.2	0.00734	0.00554	0.00527	0.00487
694.1	0.83702	0.98471	0.19067	1.48401	694.1	0.00735	0.00554	0.00528	0.00485
694	0.74234	0.87847	-0.00168	1.489	694	0.00734	0.00559	0.00529	0.00484
693.9	0.31626	0.72869	0.19939	1.25399	693.9	0.00734	0.00559	0.00526	0.00482
693.8	0.50382	0.59457	0.09777	1.57498	693.8	0.00733	0.0056	0.00528	0.00485
693.7	0.2638	0.48924	0.08236	1.3258	693.7	0.00734	0.00559	0.00528	0.00485
693.6	0.29568	0.55706	0.36637	1.25962	693.6	0.00732	0.00558	0.0053	0.00488
693.5	0.38319	0.43016	0.51672	1.48176	693.5	0.00733	0.00562	0.00527	0.00488
693.4	0.52124	0.49996	0.09353	1.78006	693.4	0.00737	0.0056	0.0053	0.00485
693.3	0.25441	0.28204	0.37578	1.9456	693.3	0.00738	0.0056	0.00531	0.00489
693.2	0.19251	0.10041	0.68216	2.07597	693.2	0.00739	0.00563	0.00531	0.00491
693.1	0.19914	0.09022	0.79689	1.8086	693.1	0.00741	0.00567	0.0053	0.0049
693	0.41859	0.24897	0.81949	1.55211	693	0.00741	0.00567	0.00527	0.00492
692.9	0.50189	0.08728	0.82708	1.71881	692.9	0.00743	0.00569	0.00526	0.00491
692.8	0.37364	0.09897	0.74516	1.59629	692.8	0.00742	0.00568	0.00527	0.0049
692.7	0.25877	0.37	0.88569	1.57018	692.7	0.00743	0.00568	0.00528	0.0049
692.6	0.56826	0.43171	0.47249	1.34825	692.6	0.00746	0.00568	0.00528	0.00489
692.5	0.72408	0.36442	0.41874	1.40169	692.5	0.00748	0.00575	0.00526	0.00489
692.4	0.74216	0.39382	0.43987	1.35972	692.4	0.00748	0.00576	0.00523	0.00491
692.3	0.97483	0.45265	0.33547	1.22482	692.3	0.0075	0.00571	0.00524	0.00496
692.2	0.76131	0.18393	0.41775	0.89584	692.2	0.00747	0.00571	0.00524	0.00496
692.1	0.70706	0.27103	0.1293	0.6399	692.1	0.00744	0.00569	0.00526	0.00496
692	0.43678	0.3296	0.38028	0.37048	692	0.00744	0.00568	0.00525	0.00495
691.9	0.56286	0.43843	0.69543	0.61009	691.9	0.00746	0.00565	0.00523	0.00497
691.8	0.29427	0.18275	0.56606	0.97579	691.8	0.00743	0.00562	0.00524	0.00499
691.7	0.38975	0.25708	0.39618	0.43008	691.7	0.00742	0.00563	0.00525	0.00497
691.6	0.22702	0.07572	0.59209	0.39956	691.6	0.00739	0.0056	0.00525	0.00501
691.5	0.55037	0.09102	0.62085	0.03533	691.5	0.00739	0.00568	0.00524	0.00503
691.4	0.29845	0.23598	0.92698	-0.01335	691.4	0.00739	0.00567	0.00522	0.00503
691.3	0.63659	0.31995	0.87686	0.13841	691.3	0.00737	0.00567	0.00522	0.00504
691.2	0.60925	0.45748	0.78106	-0.05565	691.2	0.00736	0.00571	0.00528	0.00506
691.1	0.17771	0.4531	0.68658	0.06431	691.1	0.00739	0.00574	0.00531	0.00507
691	0.1061	0.52092	0.52766	0.12278	691	0.00741	0.00578	0.00534	0.00507
690.9	-0.00454	0.50645	0.42123	-0.09527	690.9	0.00742	0.00578	0.00535	0.00506
690.8	0.09384	0.37019	0.20537	-0.23705	690.8	0.00744	0.00581	0.00534	0.00507
690.7	0.02511	0.63194	0.16467	-0.48226	690.7	0.00744	0.00579	0.00534	0.0051
690.6	0.2858	0.49057	-0.09388	-0.20641	690.6	0.00746	0.00582	0.00535	0.00511
690.5	0.20684	0.5464	-0.10977	-0.2444	690.5	0.00743	0.00582	0.00537	0.00512
690.4	0.18722	0.76355	-0.21643	-0.55164	690.4	0.00744	0.00586	0.00537	0.00512
690.3	0.24613	0.39308	-0.37647	-0.56592	690.3	0.00744	0.00589	0.00536	0.00512
690.2	0.09538	0.50012	-0.29638	-0.6641	690.2	0.00747	0.00592	0.00539	0.00511
690.1	0.06949	0.61357	-0.57653	-0.83351	690.1	0.00748	0.00591	0.00541	0.00513
690	0.08143	0.68421	-0.30891	-0.96329	690	0.00748	0.00597	0.0054	0.00512
689.9	0.11329	0.55862	-0.52137	-1.03246	689.9	0.00749	0.00601	0.00539	0.00511
689.8	-0.15721	0.56922	-0.73257	-1.00705	689.8	0.0075	0.00597	0.00541	0.00512
689.7	-0.10056	0.6257	-1.00514	-0.74852	689.7	0.00753	0.00595	0.00543	0.00514
689.6	-0.25176	0.71301	-1.08127	-0.37757	689.6	0.00752	0.00597	0.00545	0.00516
689.5	-0.17394	0.95757	-1.30263	-0.37212	689.5	0.00755	0.00595	0.00546	0.00516
689.4	-0.2507	1.05341	-1.10402	-0.43199	689.4	0.00754	0.00598	0.00547	0.00515
689.3	-0.18284	1.13702	-1.16194	-0.72379	689.3	0.00754	0.00597	0.00547	0.00517
689.2	-0.47319	1.04376	-0.93399	-0.94042	689.2	0.00755	0.00601	0.00546	0.00518
689.1	-0.52372	0.90811	-0.98563	-0.75629	689.1	0.00755	0.00598	0.00545	0.00517
689	-0.89303	0.71688	-1.02498	-0.71014	689	0.00757	0.00596	0.00547	0.00515
688.9	-0.79488	0.72013	-0.89032	-0.79302	688.9	0.00757	0.006	0.00545	0.00516
688.8	-1.05382	0.86861	-0.96879	-0.81232	688.8	0.00758	0.00599	0.00544	0.00516
688.7	-1.08223	1.02341	-0.96202	-0.53496	688.7	0.00762	0.00602	0.00546	0.00515
688.6	-0.89594	0.9908	-1.02988	-0.48204	688.6	0.00763	0.00606	0.00543	0.00516
688.5	-1.3641	1.06705	-1.07598	-0.66142	688.5	0.00763	0.00606	0.00544	0.00517
688.4	-0.8034	1.17397	-1.02358	-0.7611	688.4	0.00766	0.00613	0.00543	0.00515
688.3	-0.7113	1.40336	-0.94077	-0.80192	688.3	0.00766	0.00615	0.00544	0.00515
688.2	-0.51393	1.4047	-0.91234	-0.63109	688.2	0.00768	0.00616	0.00542	0.00517
688.1	-0.34795	1.63923	-0.94604	-0.56425	688.1	0.0077	0.00616	0.00543	0.00517
688	-0.32275	1.64595	-0.94351	-0.45157	688	0.00772	0.00615	0.00545	0.00515
687.9	-0.000870196	1.66361	-1.04209	-0.52238	687.9	0.00769	0.00616	0.00544	0.00515
687.8	-0.67438	1.73041	-0.90249	-0.59948	687.8	0.00772	0.00618	0.00541	0.00514
687.7	-0.95905	1.83505	-1.07526	-0.55204	687.7	0.00774	0.00618	0.00541	0.00514
687.6	-0.57521	1.70978	-1.09857	-0.69768	687.6	0.00774	0.00617	0.00539	0.00515
687.5	-0.46898	1.61865	-0.90088	-0.38235	687.5	0.00775	0.00617	0.00539	0.00516
687.4	-0.38451	1.50571	-0.89418	-0.23726	687.4	0.00776	0.00619	0.00539	0.00519
687.3	-0.48433	1.32226	-0.88122	-0.2307	687.3	0.00773	0.00617	0.0054	0.00518
687.2	-0.47451	1.57856	-0.96534	-0.24568	687.2	0.00772	0.00613	0.00539	0.00517
687.1	-0.73487	1.6735	-0.81843	-0.45039	687.1	0.00776	0.00612	0.00538	0.00517
687	-1.01425	1.54817	-1.06997	-0.42846	687	0.00779	0.00615	0.00539	0.00518
686.9	-0.90873	1.44399	-0.79943	-0.26938	686.9	0.00778	0.00615	0.00539	0.0052
686.8	-0.82997	1.44568	-0.61913	-0.01529	686.8	0.00777	0.00611	0.00542	0.0052
686.7	-0.63492	1.39576	-0.60729	0.20868	686.7	0.00773	0.00614	0.0054	0.00519
686.6	-0.78994	1.68837	-0.49168	0.07719	686.6	0.00774	0.00615	0.00539	0.0052
686.5	-0.88716	1.43887	-0.32358	0.16058	686.5	0.00776	0.00614	0.00539	0.00521
686.4	-0.73226	1.66192	-0.45636	0.0738	686.4	0.00774	0.00612	0.00539	0.00522
686.3	-0.32555	1.53592	-0.37753	-0.11491	686.3	0.00777	0.00616	0.00539	0.00524
686.2	-0.68961	1.72115	-0.48956	-0.13755	686.2	0.00776	0.00617	0.00535	0.00523
686.1	-0.88765	1.3742	-0.38531	-0.2241	686.1	0.0078	0.00621	0.00532	0.00521
686	-1.19198	1.23683	-0.36397	-0.20544	686	0.00782	0.00622	0.00531	0.00523
685.9	-1.14565	1.30259	-0.34586	-0.17847	685.9	0.00782	0.00622	0.00532	0.00524
685.8	-1.00689	1.22736	0.0231	0.00952	685.8	0.00784	0.0062	0.00533	0.00522
685.7	-1.04483	0.87148	-0.23515	0.08159	685.7	0.00782	0.00616	0.00534	0.00522
685.6	-1.31953	0.85982	-0.20911	0.07311	685.6	0.00786	0.00615	0.00536	0.00522
685.5	-1.27521	0.79082	0.09632	0.15806	685.5	0.00784	0.00617	0.00539	0.00522
685.4	-1.46253	0.95107	0.18279	0.51188	685.4	0.00785	0.00615	0.0054	0.00524
685.3	-0.72285	0.85285	0.14107	0.59046	685.3	0.00786	0.00616	0.00542	0.00525
685.2	-0.83971	0.72009	0.2729	0.75306	685.2	0.00786	0.00616	0.00543	0.00524
685.1	-1.08045	0.81837	0.23072	0.89224	685.1	0.00786	0.00616	0.00544	0.00523
685	-0.95629	0.98031	0.47975	1.05931	685	0.00786	0.00617	0.00544	0.00526
684.9	-1.09765	0.6619	0.15254	0.94215	684.9	0.00785	0.00616	0.00545	0.00526
684.8	-1.26308	0.7553	0.0393	0.937	684.8	0.00789	0.00618	0.00545	0.00526
684.7	-1.42802	0.81784	0.12373	0.99699	684.7	0.00792	0.00614	0.00546	0.00525
684.6	-1.51623	0.87734	0.23482	1.1606	684.6	0.00794	0.00619	0.00547	0.00525
684.5	-1.50281	0.97095	0.23792	1.23231	684.5	0.00794	0.00621	0.00548	0.00523
684.4	-1.32431	0.67179	0.15461	1.21343	684.4	0.00798	0.00623	0.0055	0.00526
684.3	-0.63287	0.43991	0.21881	1.50871	684.3	0.00798	0.00624	0.00551	0.00524
684.2	-0.7274	0.43003	0.17713	1.49044	684.2	0.00796	0.00631	0.00551	0.00526
684.1	-0.79624	0.58337	0.10675	1.33945	684.1	0.00796	0.00631	0.00552	0.00527
684	-1.09954	0.4538	0.20616	1.27568	684	0.00797	0.00631	0.00554	0.00527
683.9	-0.60902	0.73024	0.41705	1.41583	683.9	0.00798	0.00633	0.00554	0.00526
683.8	-0.51566	0.6378	0.48925	1.48624	683.8	0.00802	0.00634	0.00552	0.00529
683.7	-0.17788	0.64311	0.5188	1.63784	683.7	0.00803	0.00639	0.00556	0.00532
683.6	0.09882	0.50652	0.95645	1.74843	683.6	0.00802	0.00636	0.00557	0.00533
683.5	0.26784	0.53092	0.72905	1.75083	683.5	0.00804	0.00638	0.00554	0.00531
683.4	0.20861	0.43208	0.51685	1.6548	683.4	0.00806	0.00639	0.00551	0.0053
683.3	0.5069	0.16987	0.54259	1.65594	683.3	0.00812	0.00636	0.00553	0.0053
683.2	0.56751	0.07006	0.38507	1.55392	683.2	0.00814	0.00634	0.00558	0.00532
683.1	0.39966	0.23908	0.16976	1.38935	683.1	0.00813	0.00637	0.00558	0.00531
683	0.42021	0.09261	0.4284	1.27763	683	0.00816	0.00643	0.0056	0.00532
682.9	0.24413	0.04127	0.62333	1.41236	682.9	0.00813	0.00643	0.0056	0.00531
682.8	0.52607	-0.07149	0.82663	1.25378	682.8	0.00815	0.00643	0.00565	0.00532
682.7	0.8618	-0.01697	0.7921	1.04315	682.7	0.00812	0.00638	0.00568	0.00533
682.6	0.92344	0.0258	0.52071	1.20712	682.6	0.00811	0.00637	0.00568	0.00535
682.5	0.51876	0.4197	0.57103	1.28931	682.5	0.00815	0.0064	0.00567	0.00536
682.4	0.14584	0.5714	0.44839	1.13989	682.4	0.00814	0.00641	0.00567	0.00538
682.3	0.5191	0.92855	0.35207	1.02059	682.3	0.00814	0.00646	0.00567	0.00537
682.2	0.76519	1.41752	0.12814	0.92479	682.2	0.00816	0.00648	0.00568	0.00538
682.1	0.71298	0.96289	0.01341	1.03883	682.1	0.00817	0.00651	0.00566	0.0054
682	0.3774	0.65681	-0.13486	1.09362	682	0.00815	0.00651	0.00566	0.00538
681.9	0.17589	0.57556	-0.06773	0.80361	681.9	0.00819	0.00648	0.00563	0.00541
681.8	0.08186	0.64014	-0.0068	0.68215	681.8	0.00823	0.00649	0.00562	0.00542
681.7	0.0819	0.49844	-0.25866	0.76005	681.7	0.00824	0.0065	0.00567	0.00543
681.6	-0.01406	0.50567	0.1483	0.62114	681.6	0.00827	0.00651	0.00567	0.00545
681.5	-0.04484	0.5113	0.04663	0.71355	681.5	0.00826	0.0065	0.00568	0.00547
681.4	-0.15769	0.4679	-0.06835	0.64413	681.4	0.00824	0.0065	0.00569	0.00547
681.3	-0.24882	0.61802	-0.05142	0.61727	681.3	0.00823	0.00648	0.00571	0.00552
681.2	-0.22713	0.61607	0.10076	0.23111	681.2	0.00825	0.00646	0.00571	0.00557
681.1	-0.13476	0.59537	0.17578	0.46489	681.1	0.00827	0.00644	0.00568	0.00557
681	-0.34943	0.55789	0.15244	0.03234	681	0.00827	0.00644	0.00566	0.0056
680.9	-0.40001	0.29614	0.07376	0.01012	680.9	0.00828	0.00642	0.00565	0.00558
680.8	-0.11614	0.45032	0.44651	-0.06807	680.8	0.00828	0.0064	0.00566	0.00555
680.7	-0.5453	0.46141	0.3386	-0.3195	680.7	0.00827	0.0064	0.00567	0.00552
680.6	-0.84709	0.33167	0.42587	-0.09816	680.6	0.00827	0.00645	0.00571	0.00554
680.5	-1.13782	0.31225	0.67611	-0.23929	680.5	0.00827	0.00641	0.00574	0.0055
680.4	-1.04684	0.32099	0.66886	-0.44209	680.4	0.00827	0.00639	0.00573	0.00549
680.3	-1.06225	0.3862	0.877	-0.53902	680.3	0.0083	0.0064	0.00572	0.00552
680.2	-0.89337	0.38278	1.07126	-0.63259	680.2	0.00832	0.0064	0.00573	0.00552
680.1	-0.80611	0.65224	1.13591	-0.80925	680.1	0.00831	0.00639	0.00573	0.00553
680	-1.20496	0.46099	1.37965	-0.74062	680	0.00832	0.00636	0.0057	0.00552
679.9	-0.91261	0.56495	1.47462	-0.52541	679.9	0.00832	0.00638	0.00569	0.00549
679.8	-0.70925	0.35281	1.32009	-0.39775	679.8	0.00831	0.00633	0.00567	0.00546
679.7	-0.72968	0.29207	1.36972	-0.10781	679.7	0.00835	0.00633	0.00567	0.00548
679.6	-0.77962	0.43439	1.28745	0.12341	679.6	0.00837	0.0063	0.00569	0.00549
679.5	-1.06308	0.42439	1.3277	0.26573	679.5	0.00838	0.00636	0.00573	0.0055
679.4	-0.9036	0.51472	1.77849	0.05286	679.4	0.00835	0.00636	0.00572	0.00551
679.3	-0.73884	-0.04563	1.67237	0.19862	679.3	0.00834	0.00638	0.00574	0.00551
679.2	-0.68607	-0.09908	1.82765	0.41732	679.2	0.00837	0.00638	0.00572	0.00549
679.1	-0.85995	0.12974	2.14854	0.70751	679.1	0.0084	0.00637	0.00574	0.00554
679	-0.84962	-0.03517	2.07063	0.49654	679	0.0084	0.00639	0.00571	0.00558
678.9	-0.52849	0.11414	1.77983	0.61507	678.9	0.00842	0.00641	0.00571	0.00556
678.8	-0.2235	0.4815	1.8021	0.39004	678.8	0.00845	0.00642	0.00575	0.00557
678.7	0.18766	0.20442	1.68815	0.39817	678.7	0.00843	0.00644	0.00574	0.00557
678.6	-0.24943	0.10622	1.59972	0.74883	678.6	0.00839	0.00641	0.00576	0.00558
678.5	-0.31683	-0.07965	1.88218	0.83649	678.5	0.00841	0.00643	0.00573	0.00557
678.4	-0.12965	-0.01705	1.54185	0.82467	678.4	0.00841	0.00645	0.00574	0.00559
678.3	0.04375	-0.30441	1.5406	0.94213	678.3	0.00842	0.00641	0.00574	0.00561
678.2	0.06373	-0.55341	1.61017	1.14481	678.2	0.00846	0.00643	0.00576	0.00562
678.1	0.38191	-1.01339	1.38455	1.52749	678.1	0.00844	0.00645	0.00576	0.00557
678	0.01545	-0.95705	1.55739	1.75771	678	0.00848	0.00643	0.00576	0.00556
677.9	0.06269	-0.88527	1.48964	1.70746	677.9	0.00844	0.00641	0.00579	0.00556
677.8	-0.10455	-0.74707	1.61187	2.13314	677.8	0.00848	0.00645	0.00583	0.00556
677.7	-0.26664	-0.73658	1.44263	2.10008	677.7	0.0085	0.00646	0.00585	0.00559
677.6	-0.06776	-0.71757	1.45097	2.47882	677.6	0.00852	0.00653	0.00586	0.00558
677.5	-0.03178	-0.77522	1.37087	2.16399	677.5	0.00852	0.00654	0.00584	0.00562
677.4	0.37977	-0.44999	1.18268	1.85756	677.4	0.00852	0.00655	0.00586	0.00563
677.3	0.29735	-0.21908	0.92719	1.88336	677.3	0.00855	0.00656	0.00585	0.00563
677.2	0.12494	-0.27166	0.79332	1.93161	677.2	0.00855	0.00658	0.00588	0.0056
677.1	0.08793	-0.30199	0.60471	1.91833	677.1	0.00856	0.00656	0.00591	0.00562
677	-0.31189	0.14897	0.82153	2.16899	677	0.00855	0.00658	0.00592	0.00565
676.9	-0.45596	0.45371	0.63714	2.07222	676.9	0.00855	0.00663	0.00592	0.00567
676.8	-0.26781	0.77669	0.5477	2.0681	676.8	0.00856	0.00661	0.00593	0.00572
676.7	-0.37552	0.83183	0.6863	1.99005	676.7	0.00855	0.00661	0.00596	0.00571
676.6	-0.52689	0.73716	0.90299	1.87995	676.6	0.00858	0.00666	0.00597	0.00571
676.5	-0.34125	0.88376	1.00867	1.85875	676.5	0.00858	0.00669	0.00596	0.00572
676.4	0.07024	1.04871	1.02454	1.76975	676.4	0.00857	0.00667	0.00593	0.00569
676.3	0.01365	0.90625	0.96031	1.89395	676.3	0.00861	0.00669	0.00591	0.00568
676.2	-0.00572	1.1866	0.85864	2.02976	676.2	0.00863	0.00666	0.00591	0.00567
676.1	-0.09475	1.23347	1.10059	2.12423	676.1	0.00866	0.00664	0.00595	0.00572
676	0.17216	1.38731	1.12052	2.09423	676	0.00865	0.00668	0.00594	0.00572
675.9	0.2573	1.18515	1.34656	2.23221	675.9	0.00865	0.00668	0.00597	0.00567
675.8	0.24186	1.20108	1.25427	2.47509	675.8	0.00866	0.00662	0.00598	0.00572
675.7	0.416	1.02841	1.71575	2.49064	675.7	0.00865	0.00664	0.00598	0.00574
675.6	0.05892	1.27549	1.84052	2.61401	675.6	0.00867	0.00665	0.00598	0.00575
675.5	-0.30452	1.6846	1.911	2.33564	675.5	0.00869	0.00667	0.006	0.00576
675.4	-0.45066	1.68894	2.05877	2.32967	675.4	0.00871	0.00669	0.00599	0.00583
675.3	-0.58032	1.61278	2.00146	2.27579	675.3	0.00871	0.00669	0.00597	0.00583
675.2	-0.52945	1.80864	1.69043	2.23846	675.2	0.00874	0.00671	0.00598	0.0058
675.1	-0.63716	2.02082	1.55076	1.91456	675.1	0.00873	0.00678	0.00598	0.00578
675	-0.34868	2.20179	1.73418	1.68237	675	0.00873	0.00677	0.00598	0.00579
674.9	-0.000731033	2.19392	1.6145	1.65982	674.9	0.00872	0.00676	0.00601	0.00579
674.8	-0.05408	2.35725	1.54619	1.40403	674.8	0.00874	0.0068	0.00602	0.00581
674.7	0.15423	2.4326	1.70355	1.17586	674.7	0.00875	0.00678	0.00599	0.00584
674.6	0.05278	2.32406	1.63836	1.27148	674.6	0.00875	0.00676	0.00599	0.00584
674.5	0.13772	2.5678	1.91868	1.02947	674.5	0.00879	0.00672	0.00597	0.00585
674.4	0.0165	2.75761	1.63461	1.29579	674.4	0.00877	0.00669	0.00599	0.00584
674.3	-0.39231	2.50588	1.47673	1.6643	674.3	0.00879	0.00667	0.00594	0.0058
674.2	-0.18015	2.14471	1.4042	1.64257	674.2	0.0088	0.0067	0.00596	0.0058
674.1	0.13012	2.23719	1.27173	1.57657	674.1	0.00879	0.00669	0.00595	0.00583
674	-0.000701453	2.59381	1.26286	1.34442	674	0.00879	0.00672	0.00593	0.00582
673.9	0.35257	2.36435	1.18265	1.2704	673.9	0.00881	0.00675	0.00596	0.00582
673.8	0.51597	2.21325	1.35802	1.16348	673.8	0.00883	0.00676	0.00598	0.00583
673.7	0.63301	1.80597	1.39832	1.24018	673.7	0.00884	0.00673	0.00598	0.00579
673.6	0.39438	1.77984	1.49927	0.9894	673.6	0.00883	0.00675	0.006	0.00581
673.5	0.60273	1.81634	1.56435	1.16419	673.5	0.00883	0.00676	0.00602	0.00583
673.4	0.71465	1.68373	1.38191	1.0616	673.4	0.00884	0.00676	0.00602	0.00583
673.3	0.30026	1.54953	1.17901	1.22467	673.3	0.00885	0.00677	0.00602	0.00586
673.2	0.51729	1.62748	1.08758	1.02999	673.2	0.00884	0.00683	0.00604	0.00588
673.1	0.61943	1.45711	0.83459	0.68901	673.1	0.00884	0.00684	0.00608	0.00588
673	0.77106	1.57145	0.87643	0.38271	673	0.00881	0.00684	0.00604	0.00588
672.9	0.33993	1.51539	1.06198	0.4862	672.9	0.00882	0.00683	0.0061	0.00587
672.8	0.35359	1.39529	1.09999	0.29261	672.8	0.00881	0.00682	0.00611	0.00588
672.7	0.67283	1.273	0.97917	0.01873	672.7	0.0088	0.00684	0.00611	0.00589
672.6	0.64072	1.3685	0.67272	-0.01569	672.6	0.0088	0.00688	0.00611	0.0059
672.5	0.31726	1.35121	0.57357	0.0039	672.5	0.00885	0.0069	0.00609	0.0059
672.4	0.77272	1.12439	0.43978	0.21237	672.4	0.00885	0.00692	0.00613	0.00588
672.3	0.76908	1.02001	0.40184	0.25875	672.3	0.00887	0.00686	0.00612	0.00586
672.2	0.92478	1.45709	0.36967	0.04844	672.2	0.00886	0.00687	0.00614	0.00584
672.1	1.15521	1.10296	0.63832	-0.0946	672.1	0.00886	0.00683	0.00616	0.00586
672	1.08041	1.12415	1.01854	-0.13348	672	0.00888	0.00684	0.00614	0.00588
671.9	0.8951	1.36753	1.57213	0.10215	671.9	0.00891	0.00682	0.00611	0.00587
671.8	0.479	1.56501	1.62175	0.21425	671.8	0.00895	0.00685	0.00609	0.00589
671.7	0.37357	1.6305	1.65623	0.20484	671.7	0.00896	0.00683	0.0061	0.00592
671.6	0.18384	1.8097	1.69288	0.16202	671.6	0.00896	0.00683	0.00612	0.00595
671.5	0.2631	1.45393	1.69338	0.08278	671.5	0.00898	0.00686	0.00615	0.00595
671.4	0.56823	1.45586	1.8095	-0.08118	671.4	0.00897	0.00691	0.00614	0.00597
671.3	0.63822	1.32007	1.53203	0.05504	671.3	0.009	0.00692	0.00614	0.006
671.2	0.75654	0.98831	1.42476	0.13345	671.2	0.00902	0.00696	0.00615	0.00603
671.1	0.88714	0.98547	1.70484	0.08568	671.1	0.00904	0.00697	0.00617	0.00607
671	0.57421	1.02448	1.80753	0.00845	671	0.00906	0.00696	0.0062	0.00608
670.9	0.47822	0.99922	1.92018	-0.08031	670.9	0.00908	0.00699	0.0062	0.00606
670.8	0.46616	0.85614	1.63261	0.13698	670.8	0.00911	0.00703	0.00621	0.00606
670.7	0.4097	0.77091	1.77353	0.20577	670.7	0.00911	0.00701	0.00621	0.00608
670.6	0.06403	0.56933	1.23852	0.60186	670.6	0.00911	0.00701	0.00622	0.00605
670.5	0.03352	0.96731	1.62712	0.59569	670.5	0.00909	0.00704	0.00621	0.00607
670.4	0.03238	0.60333	1.54861	0.83811	670.4	0.00912	0.00707	0.00622	0.00605
670.3	-0.16907	0.558	1.19255	0.75785	670.3	0.00916	0.00706	0.0062	0.00606
670.2	-0.15708	0.94739	1.53127	0.59724	670.2	0.00918	0.00702	0.00619	0.00607
670.1	0.041	0.83112	1.65738	0.48185	670.1	0.00919	0.00701	0.00619	0.00606
670	-0.04404	0.64807	1.67963	0.43813	670	0.00921	0.00696	0.00618	0.00607
669.9	0.06231	0.78907	1.64363	0.64982	669.9	0.00921	0.00694	0.00618	0.00607
669.8	-0.16451	0.78986	1.5408	0.31743	669.8	0.00923	0.00697	0.00622	0.00607
669.7	0.0799	0.69599	1.51365	0.27915	669.7	0.00925	0.00698	0.00621	0.00609
669.6	-0.24592	0.62911	1.37306	0.47876	669.6	0.00928	0.007	0.00619	0.0061
669.5	-0.30419	0.61337	1.0021	0.58025	669.5	0.00931	0.00702	0.00616	0.00609
669.4	-0.72655	1.0183	1.04192	0.3541	669.4	0.00931	0.00704	0.00617	0.00608
669.3	-0.97089	0.87674	1.23261	0.49986	669.3	0.00931	0.00702	0.00617	0.00609
669.2	-0.78438	0.72129	0.92726	0.58829	669.2	0.00929	0.00704	0.0062	0.0061
669.1	-0.76429	0.5175	0.6903	0.66892	669.1	0.00927	0.00706	0.00618	0.00614
669	-0.82782	0.34185	0.41672	0.92237	669	0.00928	0.00713	0.00617	0.00614
668.9	-0.67716	0.20099	0.54808	0.92165	668.9	0.00931	0.00712	0.00617	0.00614
668.8	-0.82699	0.34672	0.2124	1.19228	668.8	0.00928	0.0072	0.00621	0.00615
668.7	-0.54411	0.4136	-0.08396	1.26266	668.7	0.00928	0.00719	0.00628	0.00616
668.6	-0.57648	0.18334	-0.33469	1.34534	668.6	0.00925	0.00716	0.00631	0.00616
668.5	-0.46258	0.2896	-0.12076	1.20214	668.5	0.00925	0.00718	0.00634	0.00617
668.4	-0.67775	-0.07457	0.11607	1.40234	668.4	0.00924	0.00715	0.00634	0.00616
668.3	-0.78568	-0.25231	0.10073	1.28426	668.3	0.00926	0.00718	0.00632	0.00616
668.2	-0.92352	-0.19336	-0.19211	1.31701	668.2	0.00928	0.00719	0.00631	0.00615
668.1	-1.08377	0.14556	-0.35116	1.32871	668.1	0.00927	0.00717	0.00629	0.00614
668	-1.1908	0.23924	-0.08011	1.24407	668	0.00928	0.00717	0.00631	0.0061
667.9	-1.03356	0.40441	0.06113	1.11772	667.9	0.0093	0.0072	0.00629	0.00611
667.8	-0.72423	0.36434	-0.11662	1.1844	667.8	0.00932	0.0072	0.0063	0.00608
667.7	-0.74326	0.44916	-0.42206	1.36616	667.7	0.00934	0.00719	0.00627	0.00611
667.6	-0.51966	0.23163	-0.27849	1.41086	667.6	0.00937	0.0072	0.00627	0.00614
667.5	-0.67767	0.31232	-0.42147	1.47613	667.5	0.00936	0.00717	0.00627	0.00616
667.4	-0.90637	0.2765	-0.10949	1.59508	667.4	0.00939	0.00719	0.00628	0.00616
667.3	-0.6662	-0.1174	0.04839	1.27825	667.3	0.00943	0.00717	0.0063	0.00616
667.2	-0.51382	-0.18704	0.19537	0.97198	667.2	0.00948	0.00719	0.00632	0.00615
667.1	-0.22945	-0.03945	0.14242	0.5965	667.1	0.00951	0.00722	0.00632	0.00619
667	-0.02943	-0.000478622	0.26515	0.50169	667	0.00951	0.0072	0.0063	0.0062
666.9	0.07851	-0.20089	0.25609	0.27679	666.9	0.00951	0.00722	0.00632	0.00617
666.8	-0.14963	-0.1792	0.03407	0.09709	666.8	0.0095	0.0072	0.00633	0.00617
666.7	-0.00249	0.03617	0.04463	0.0086	666.7	0.00949	0.00728	0.00636	0.00617
666.6	-0.02937	0.23354	0.1615	-0.22493	666.6	0.00948	0.0073	0.00633	0.00619
666.5	-0.25679	0.35053	0.29195	-0.38902	666.5	0.0095	0.00734	0.00636	0.00621
666.4	-0.43939	0.44666	0.35378	-0.1069	666.4	0.00951	0.00736	0.00637	0.0062
666.3	-0.51301	0.34755	0.27459	0.11146	666.3	0.00951	0.00737	0.00635	0.00621
666.2	-0.51312	0.3797	0.3194	0.10833	666.2	0.00953	0.00739	0.0064	0.00621
666.1	0.14851	0.37196	0.62499	0.11444	666.1	0.00952	0.0074	0.00646	0.00621
666	0.30019	0.27867	0.54467	0.03133	666	0.00954	0.00736	0.00648	0.00621
665.9	0.93729	0.4896	0.29753	-0.12387	665.9	0.00955	0.00739	0.00649	0.00621
665.8	0.93697	0.53895	0.38568	-0.23406	665.8	0.00957	0.00738	0.00649	0.0062
665.7	0.8405	0.6082	0.48737	-0.50071	665.7	0.00959	0.00739	0.00655	0.00618
665.6	0.59243	0.83959	0.79718	-0.68724	665.6	0.00959	0.00737	0.00658	0.00622
665.5	0.62045	0.96325	0.93349	-0.51169	665.5	0.00959	0.00738	0.00658	0.00623
665.4	0.66623	0.91536	0.56217	-0.65104	665.4	0.00962	0.00737	0.00654	0.00624
665.3	0.68768	0.83279	0.71288	-0.63453	665.3	0.00965	0.00737	0.0065	0.00625
665.2	1.00618	0.66144	0.51009	-0.75242	665.2	0.00971	0.00741	0.00653	0.00627
665.1	1.14725	0.74306	0.339	-0.39642	665.1	0.00971	0.00739	0.00652	0.00627
665	1.49339	0.75184	0.29643	-0.47829	665	0.00974	0.00742	0.00651	0.00627
664.9	1.74981	0.79487	0.05841	-0.66709	664.9	0.00977	0.00744	0.0065	0.00626
664.8	2.13607	0.53428	0.04062	-0.67166	664.8	0.00976	0.00741	0.00649	0.00626
664.7	2.24836	0.33353	0.22949	-0.70747	664.7	0.00979	0.00742	0.00651	0.00626
664.6	2.15604	0.21077	0.02025	-0.66965	664.6	0.00976	0.00744	0.00654	0.00633
664.5	1.87765	0.03707	0.24308	-0.69083	664.5	0.00976	0.00745	0.00656	0.00631
664.4	1.90496	0.15703	0.25159	-0.93459	664.4	0.00976	0.00744	0.00656	0.00633
664.3	2.04729	0.1534	0.78432	-1.06112	664.3	0.00978	0.00745	0.00656	0.00632
664.2	1.77983	0.1884	0.8592	-1.09995	664.2	0.00977	0.00747	0.00657	0.00631
664.1	1.71722	0.11648	0.45681	-0.94017	664.1	0.00976	0.00745	0.00658	0.00632
664	2.02546	-0.21834	0.73403	-0.81934	664	0.00978	0.00741	0.0066	0.00633
663.9	1.86316	-0.05587	0.75902	-1.1089	663.9	0.00981	0.00742	0.0066	0.00633
663.8	1.88049	-0.19644	0.47253	-0.73229	663.8	0.0098	0.00746	0.00658	0.00638
663.7	2.08571	-0.06587	-0.15553	-0.1809	663.7	0.0098	0.00745	0.0066	0.00635
663.6	1.60423	0.07529	-0.36706	0.23121	663.6	0.00981	0.00752	0.00662	0.00635
663.5	0.96352	-0.22241	-0.30925	-0.01528	663.5	0.00981	0.00754	0.00663	0.00638
663.4	1.06076	0.02151	-0.22969	0.00743	663.4	0.00985	0.00757	0.00664	0.00638
663.3	0.91292	-0.07603	-0.07427	0.22897	663.3	0.00988	0.00755	0.00666	0.0064
663.2	1.13775	-0.22768	-0.29729	0.67988	663.2	0.00991	0.00755	0.00668	0.00639
663.1	1.28909	-0.15503	-0.66483	0.7059	663.1	0.00994	0.00752	0.00668	0.00641
663	1.26501	-0.09346	-0.30329	0.87386	663	0.00995	0.00751	0.00668	0.00641
662.9	1.8611	-0.13573	-0.16333	0.72792	662.9	0.00998	0.00754	0.00671	0.00641
662.8	1.47179	0.00745	-0.15539	0.3865	662.8	0.00999	0.00751	0.00671	0.00641
662.7	1.1436	-0.03161	-0.15894	0.46886	662.7	0.01003	0.00751	0.00667	0.00644
662.6	1.19024	-0.03515	-0.22208	0.4366	662.6	0.01005	0.00757	0.00667	0.00644
662.5	0.84683	-0.43619	-0.16972	0.4641	662.5	0.01005	0.00755	0.00667	0.00643
662.4	0.56812	-0.44986	-0.01754	0.72304	662.4	0.01009	0.00755	0.00668	0.00645
662.3	0.35638	-0.3443	0.00642	1.0236	662.3	0.0101	0.00755	0.00665	0.00645
662.2	0.4509	-0.41165	0.0376	1.06879	662.2	0.0101	0.00756	0.00665	0.00641
662.1	-0.02976	-0.26116	-0.03233	0.96838	662.1	0.01011	0.00758	0.00665	0.00641
662	-0.29129	-0.38433	0.16765	1.22133	662	0.01015	0.00758	0.00668	0.00644
661.9	-0.56324	-0.49727	0.24092	1.03345	661.9	0.01017	0.0076	0.00671	0.00643
661.8	-0.88634	-0.59375	0.43693	1.24687	661.8	0.01014	0.0076	0.00669	0.00646
661.7	-1.46557	-1.1188	0.39759	1.14233	661.7	0.01017	0.00761	0.00669	0.00645
661.6	-1.68804	-0.9054	0.14604	1.14999	661.6	0.01016	0.00766	0.00671	0.00643
661.5	-1.77143	-0.8155	0.49043	1.26994	661.5	0.01018	0.0077	0.00677	0.00643
661.4	-1.73728	-0.5058	0.63296	1.4379	661.4	0.0102	0.00774	0.00679	0.00646
661.3	-1.67375	-0.54554	0.72611	1.43037	661.3	0.01021	0.00773	0.00681	0.00646
661.2	-1.55749	-0.88442	0.76384	1.22675	661.2	0.01023	0.00771	0.00682	0.00647
661.1	-1.39899	-0.74523	0.56363	1.07497	661.1	0.01029	0.00769	0.00684	0.00648
661	-1.6249	-1.17215	0.2549	1.04715	661	0.01029	0.0077	0.00687	0.00647
660.9	-2.11606	-1.04518	0.03433	0.97779	660.9	0.01029	0.0077	0.00689	0.00647
660.8	-2.34596	-0.68425	-0.05186	1.22873	660.8	0.01032	0.0077	0.00692	0.0065
660.7	-2.39508	-0.77544	0.16782	1.37896	660.7	0.01033	0.00769	0.00696	0.0065
660.6	-2.18906	-0.37703	0.25758	0.98854	660.6	0.01031	0.00772	0.00691	0.00651
660.5	-1.79238	-0.1868	-0.06406	1.22799	660.5	0.01026	0.0077	0.00692	0.00651
660.4	-2.03082	-0.18672	0.06291	1.16194	660.4	0.01028	0.00772	0.00696	0.00652
660.3	-2.32138	-0.68554	0.16126	0.82947	660.3	0.01029	0.00771	0.00697	0.00655
660.2	-1.87011	-0.7864	0.43281	0.91238	660.2	0.01032	0.00772	0.00699	0.00655
660.1	-1.86991	-0.69095	-0.10286	1.21365	660.1	0.01035	0.00774	0.00703	0.00655
660	-1.84733	-0.82328	-0.23843	1.35697	660	0.01035	0.00774	0.00704	0.00658
659.9	-2.10532	-0.64061	-0.39947	1.35684	659.9	0.01037	0.00774	0.00704	0.00659
659.8	-1.93236	-0.84036	-0.32402	1.29557	659.8	0.0104	0.00777	0.00708	0.00659
659.7	-1.81181	-1.21866	-0.43966	1.21391	659.7	0.01039	0.00778	0.00708	0.0066
659.6	-2.20277	-1.5401	-0.64881	1.18765	659.6	0.01039	0.00775	0.0071	0.00664
659.5	-1.90319	-1.42406	-0.57136	1.61989	659.5	0.01041	0.00779	0.00709	0.00665
659.4	-1.62357	-1.55884	-0.40404	1.84725	659.4	0.01041	0.00783	0.00712	0.00664
659.3	-1.42633	-1.62152	0.15725	1.8253	659.3	0.0104	0.00783	0.00714	0.00665
659.2	-1.78371	-1.40158	0.1127	1.67006	659.2	0.01041	0.00782	0.00714	0.00666
659.1	-1.7225	-0.95737	0.08151	1.4816	659.1	0.01042	0.00783	0.00712	0.00666
659	-1.16428	-1.13514	0.21518	1.59393	659	0.01045	0.00785	0.00713	0.00667
658.9	-1.20481	-1.25467	0.17059	1.5025	658.9	0.01047	0.00788	0.00713	0.00667
658.8	-0.86148	-1.41083	0.28279	1.365	658.8	0.01048	0.00788	0.00714	0.00666
658.7	-0.47425	-1.52472	0.29122	1.28151	658.7	0.01051	0.0079	0.00715	0.00661
658.6	-0.10354	-1.25018	0.29476	1.46568	658.6	0.01048	0.00791	0.00711	0.00661
658.5	0.12568	-0.99877	0.28662	1.20171	658.5	0.0105	0.0079	0.00712	0.00658
658.4	0.63044	-0.3657	0.15862	1.25793	658.4	0.01048	0.00786	0.00713	0.00658
658.3	0.72924	-0.65514	0.43786	1.5348	658.3	0.01052	0.00783	0.00713	0.00661
658.2	0.50965	-0.82587	0.40207	1.5392	658.2	0.01056	0.0078	0.00711	0.0066
658.1	0.51505	-0.82523	0.14895	1.49475	658.1	0.01057	0.0078	0.00714	0.00662
658	0.64662	-0.86558	0.01468	1.45937	658	0.01057	0.00786	0.00713	0.00663
657.9	0.65047	-0.53749	-0.18732	1.51297	657.9	0.0106	0.0079	0.00713	0.00666
657.8	0.68535	-0.55534	-0.0495	1.65976	657.8	0.01061	0.00789	0.00714	0.00669
657.7	1.04093	-0.308	0.18484	1.87051	657.7	0.01066	0.0079	0.00711	0.00668
657.6	1.17948	-0.5407	0.07187	1.90623	657.6	0.01066	0.00792	0.00709	0.00673
657.5	1.57284	-0.84999	0.10364	1.96965	657.5	0.0107	0.00797	0.00707	0.00676
657.4	1.37133	-0.63063	0.13861	1.93951	657.4	0.01069	0.00799	0.00708	0.00678
657.3	1.34873	-0.44782	0.11326	2.31032	657.3	0.01073	0.00801	0.00713	0.00679
657.2	0.98712	-0.4878	0.09576	2.49565	657.2	0.01071	0.00798	0.00713	0.00681
657.1	1.30216	-0.16028	0.08296	2.57452	657.1	0.0107	0.00794	0.00712	0.00682
657	1.34939	0.68889	0.33059	2.2484	657	0.0107	0.00797	0.00712	0.00682
656.9	0.79574	0.59007	0.29869	2.34386	656.9	0.01065	0.00798	0.0071	0.0068
656.8	0.21273	0.34206	0.42227	2.50553	656.8	0.01069	0.00803	0.00706	0.00683
656.7	0.30365	0.70384	0.5071	2.64512	656.7	0.01066	0.00805	0.00708	0.00681
656.6	0.57686	0.67	0.72536	2.35131	656.6	0.01067	0.00809	0.00709	0.00681
656.5	-0.04265	0.95961	0.85954	2.54896	656.5	0.01066	0.00811	0.00712	0.00685
656.4	-0.2571	0.84913	0.92326	2.7344	656.4	0.01069	0.00813	0.00714	0.00688
656.3	-0.01401	1.35464	0.94809	2.81688	656.3	0.01069	0.0082	0.00716	0.00685
656.2	-0.82584	1.19949	0.72202	2.8813	656.2	0.01072	0.0082	0.00717	0.00684
656.1	-0.66984	0.9424	0.48779	3.17395	656.1	0.01071	0.00817	0.0072	0.00684
656	-0.76286	0.67857	0.27165	3.05205	656	0.01073	0.00818	0.00722	0.00684
655.9	-0.86244	0.6076	0.64306	3.31636	655.9	0.01073	0.00819	0.00724	0.00687
655.8	-1.07564	0.51247	0.66324	3.1454	655.8	0.01073	0.00822	0.00724	0.00686
655.7	-1.23833	0.59367	0.90712	2.77521	655.7	0.01077	0.00821	0.00724	0.00687
655.6	-1.46429	0.58679	0.80964	2.92793	655.6	0.01075	0.00824	0.00723	0.00688
655.5	-1.21268	0.81853	0.87823	2.83529	655.5	0.01077	0.00829	0.00723	0.00692
655.4	-1.36223	1.01741	0.60465	3.06215	655.4	0.01075	0.0083	0.00729	0.00692
655.3	-1.42638	0.64123	0.58001	2.87138	655.3	0.01079	0.00834	0.0073	0.00692
655.2	-0.87855	0.59284	0.4086	2.88231	655.2	0.01079	0.00836	0.0073	0.00695
655.1	-0.99115	0.64511	0.37604	2.64691	655.1	0.01081	0.00839	0.00729	0.00699
655	-0.48494	0.67498	0.30541	2.38741	655	0.01083	0.00844	0.00729	0.00699
654.9	-0.77249	0.84067	0.45452	2.5606	654.9	0.01081	0.00847	0.00729	0.007
654.8	-0.90413	1.38771	0.49067	2.644	654.8	0.01081	0.00846	0.00731	0.00698
654.7	-0.90623	1.15781	0.72624	2.58493	654.7	0.01083	0.00845	0.00734	0.00699
654.6	-0.80702	1.11472	0.91989	2.66074	654.6	0.01082	0.00848	0.00736	0.00698
654.5	-0.98031	1.08974	0.72872	2.82574	654.5	0.01082	0.00848	0.00737	0.00702
654.4	-1.05042	0.86879	0.82878	2.57714	654.4	0.01083	0.00855	0.00739	0.00703
654.3	-1.32671	0.99289	0.95666	2.27467	654.3	0.01084	0.00855	0.00742	0.007
654.2	-1.44659	0.59187	0.6683	2.05548	654.2	0.01082	0.00857	0.00741	0.00702
654.1	-1.60746	0.52325	0.56423	1.7802	654.1	0.01084	0.00861	0.00743	0.00702
654	-1.847	-0.03123	1.11148	1.60135	654	0.01089	0.00864	0.00741	0.00702
653.9	-1.85128	-0.05437	1.28607	1.45912	653.9	0.01091	0.00868	0.00743	0.00704
653.8	-2.09563	-0.39336	1.36198	1.42825	653.8	0.01094	0.0087	0.00744	0.00703
653.7	-0.99327	-0.71504	1.34528	1.53596	653.7	0.01099	0.00871	0.00746	0.00707
653.6	-0.80856	-0.70851	1.18297	1.3621	653.6	0.01103	0.00871	0.00748	0.00704
653.5	-0.2351	-0.59033	1.04728	1.41139	653.5	0.01104	0.00865	0.00751	0.00703
653.4	-0.54383	-0.86977	1.20232	1.37259	653.4	0.01107	0.0086	0.00752	0.00708
653.3	-0.33926	-0.50749	0.91212	1.44885	653.3	0.01106	0.00863	0.00749	0.0071
653.2	-0.40942	-0.9889	1.37264	1.29893	653.2	0.0111	0.00864	0.00747	0.00708
653.1	0.09211	-1.25779	0.98067	1.00884	653.1	0.01112	0.00863	0.00747	0.00708
653	0.36661	-1.72368	0.78476	0.72894	653	0.01114	0.00858	0.00751	0.0071
652.9	0.60912	-1.39208	1.09942	0.50779	652.9	0.01113	0.00863	0.0075	0.00709
652.8	0.17004	-1.33302	0.92882	0.28776	652.8	0.0112	0.00866	0.0075	0.00711
652.7	0.06993	-1.23353	0.95312	0.59178	652.7	0.0112	0.0087	0.00754	0.00715
652.6	0.27898	-1.3689	0.47326	0.36736	652.6	0.01125	0.0087	0.00755	0.00715
652.5	0.62043	-1.57658	0.57477	0.42949	652.5	0.01128	0.00868	0.00761	0.00717
652.4	0.81558	-1.23478	0.08186	0.73019	652.4	0.01127	0.00867	0.00762	0.00715
652.3	1.13644	-1.2452	0.10405	0.88861	652.3	0.01126	0.00867	0.00767	0.00716
652.2	1.1757	-1.03591	0.12193	0.76009	652.2	0.01127	0.00865	0.00769	0.00717
652.1	1.06759	-1.2901	0.32814	0.53216	652.1	0.01131	0.00863	0.00769	0.00722
652	1.57343	-1.17091	0.32083	0.92618	652	0.01131	0.00862	0.00771	0.00724
651.9	0.70086	-1.29224	1.05666	1.00099	651.9	0.01135	0.00863	0.00774	0.0072
651.8	0.34722	-1.16197	1.31421	1.50452	651.8	0.01142	0.00865	0.00777	0.00722
651.7	-0.25641	-0.94633	1.13597	1.64466	651.7	0.01141	0.00862	0.00779	0.00722
651.6	-0.0328	-0.67805	0.65392	1.29546	651.6	0.01144	0.00862	0.00781	0.00726
651.5	-0.15364	-0.89459	0.65443	0.9667	651.5	0.01145	0.00865	0.00784	0.00727
651.4	-0.41458	-0.63683	0.90507	0.90041	651.4	0.01149	0.00868	0.00784	0.00728
651.3	-0.83151	-0.42528	1.12156	0.8211	651.3	0.01153	0.00865	0.00785	0.0073
651.2	-0.7577	-0.54679	1.34338	1.00177	651.2	0.01156	0.00865	0.00787	0.00732
651.1	-0.69779	-0.22723	1.39112	1.23591	651.1	0.01154	0.00864	0.00787	0.00729
651	-0.87914	-0.20896	1.13658	1.30573	651	0.01156	0.00864	0.00788	0.00731
650.9	-0.71963	0.78686	1.40548	1.52239	650.9	0.01158	0.00863	0.00792	0.00729
650.8	-0.48654	0.30965	1.36006	1.82477	650.8	0.01161	0.00862	0.00793	0.0073
650.7	-0.00942	0.92002	1.44326	1.68353	650.7	0.01159	0.00862	0.00791	0.00728
650.6	-0.04671	0.71216	1.43288	1.47401	650.6	0.01162	0.00866	0.00792	0.00732
650.5	-0.28378	0.31216	1.95764	1.44371	650.5	0.01167	0.00861	0.00797	0.00731
650.4	-0.89141	-0.21145	2.01704	1.45373	650.4	0.01171	0.00861	0.00798	0.00732
650.3	-1.26896	-0.21027	1.95048	1.24935	650.3	0.0117	0.00866	0.00802	0.00734
650.2	-1.36651	-0.14856	2.21322	0.93324	650.2	0.01173	0.00869	0.00801	0.00738
650.1	-1.08469	0.02338	1.97465	1.03068	650.1	0.01174	0.00875	0.008	0.00735
650	-1.15769	-0.32555	1.80431	0.7199	650	0.01175	0.00875	0.00804	0.00734
649.9	-0.85772	-0.04413	2.26013	0.70144	649.9	0.01179	0.00881	0.00808	0.00737
649.8	-0.83475	0.36544	2.47647	0.55783	649.8	0.01178	0.00882	0.00805	0.00739
649.7	-1.0143	0.58311	2.41778	0.73853	649.7	0.01179	0.00885	0.00805	0.00742
649.6	-1.01957	0.43397	2.30319	0.89656	649.6	0.01179	0.00889	0.0081	0.00749
649.5	-0.4979	0.23847	2.2483	0.68227	649.5	0.0118	0.00891	0.00809	0.00751
649.4	-0.5236	0.24111	2.21142	0.35117	649.4	0.01183	0.00884	0.00807	0.00751
649.3	-0.92196	0.12416	2.25436	0.30171	649.3	0.01185	0.00887	0.00805	0.00752
649.2	-0.65534	0.11547	2.24991	0.31606	649.2	0.01187	0.0089	0.00804	0.00754
649.1	-1.01391	-0.04226	1.84593	0.53369	649.1	0.01189	0.00897	0.00806	0.00755
649	-0.88503	-0.0199	1.60644	0.47997	649	0.01195	0.00895	0.00809	0.00758
648.9	-0.72495	-0.18144	1.33531	0.47397	648.9	0.012	0.00897	0.00808	0.0076
648.8	-1.05553	-0.21787	1.31715	0.41359	648.8	0.01196	0.009	0.00808	0.00761
648.7	-1.56734	0.02203	1.37727	0.26055	648.7	0.01198	0.00903	0.00811	0.00762
648.6	-1.53072	0.1538	1.05888	-0.17824	648.6	0.01197	0.00905	0.00814	0.00767
648.5	-1.45147	0.00313	1.04962	-0.80182	648.5	0.01193	0.00908	0.00813	0.00767
648.4	-1.00347	-0.30626	0.94184	-1.08653	648.4	0.01197	0.0091	0.00817	0.00769
648.3	-1.19878	-0.78073	1.27568	-1.02276	648.3	0.01197	0.00907	0.00819	0.00769
648.2	-0.78253	-0.77779	1.39925	-0.56982	648.2	0.01198	0.00907	0.00817	0.00771
648.1	-0.53274	-0.93713	1.17522	0.13709	648.1	0.01197	0.00908	0.0082	0.00771
648	-0.34243	-1.23546	0.99508	0.39272	648	0.01199	0.00915	0.00822	0.0077
647.9	-0.04438	-0.98624	0.81836	0.2604	647.9	0.012	0.00916	0.00821	0.00769
647.8	-0.45208	-0.71313	0.52494	-0.05142	647.8	0.01201	0.00916	0.00819	0.00771
647.7	-0.41259	-0.96458	0.7297	-0.30479	647.7	0.01203	0.00918	0.0082	0.00774
647.6	0.32784	-1.07509	1.05443	-0.29121	647.6	0.01206	0.00925	0.00819	0.00777
647.5	0.0299	-1.00521	0.85927	-0.3459	647.5	0.01209	0.0093	0.00822	0.00778
647.4	-0.33116	-0.8931	0.50886	-0.24852	647.4	0.01211	0.00932	0.0082	0.00777
647.3	-0.52273	-0.97913	0.32558	-0.33074	647.3	0.01213	0.00932	0.00821	0.00778
647.2	-0.00173	-0.77669	-0.03016	-0.09503	647.2	0.01211	0.00929	0.00823	0.00776
647.1	0.32262	-0.33631	-0.27991	-0.000879774	647.1	0.01212	0.00932	0.00822	0.00778
647	0.29073	0.14169	-0.55284	0.08838	647	0.01213	0.00932	0.00822	0.00776
646.9	0.71038	0.26877	-0.73952	0.34898	646.9	0.01213	0.00932	0.00822	0.00779
646.8	0.60678	0.34166	-0.57887	0.1811	646.8	0.01214	0.00932	0.00824	0.00778
646.7	0.62736	0.27921	-0.71268	-0.06069	646.7	0.01218	0.00933	0.00825	0.00781
646.6	0.67637	0.31244	-0.96023	0.23063	646.6	0.0122	0.00933	0.00825	0.00784
646.5	0.32702	0.24496	-1.52187	0.15915	646.5	0.0122	0.00929	0.00831	0.00781
646.4	0.32762	0.10993	-1.25129	0.36036	646.4	0.01226	0.00928	0.00833	0.00782
646.3	0.33108	0.07921	-1.0593	0.33712	646.3	0.01231	0.0093	0.00831	0.00781
646.2	0.07374	0.13648	-0.994	0.58607	646.2	0.01233	0.00926	0.0083	0.00777
646.1	0.56105	0.20021	-1.00155	0.56139	646.1	0.01234	0.00929	0.00836	0.00779
646	0.65603	0.63155	-0.56365	0.64527	646	0.01234	0.0093	0.00839	0.00778
645.9	0.22335	0.62572	-0.05296	0.66458	645.9	0.01235	0.00934	0.00839	0.0078
645.8	0.3127	0.92799	0.22154	0.50683	645.8	0.01237	0.00934	0.00837	0.00784
645.7	-0.23861	0.65464	0.81805	0.45542	645.7	0.01239	0.00932	0.00836	0.00785
645.6	-0.22529	1.07804	1.06386	0.05336	645.6	0.01241	0.00935	0.00837	0.00786
645.5	-0.49362	0.88155	0.97652	0.25888	645.5	0.01245	0.00937	0.00839	0.0079
645.4	-0.16539	0.99094	0.89826	0.91895	645.4	0.0125	0.00933	0.0084	0.0079
645.3	0.15579	0.92587	0.95679	0.76877	645.3	0.0125	0.00934	0.0084	0.0079
645.2	0.00732	0.75235	0.9565	1.03178	645.2	0.01253	0.00932	0.00842	0.00789
645.1	-0.10726	0.88913	0.23879	1.25364	645.1	0.01257	0.00932	0.00844	0.00788
645	-0.73607	0.6757	0.4278	1.15048	645	0.01257	0.00936	0.00844	0.00791
644.9	-0.73135	1.22315	0.42651	0.80804	644.9	0.01257	0.00942	0.00841	0.00791
644.8	-1.28902	1.24849	0.58579	0.42845	644.8	0.01262	0.00943	0.00843	0.00796
644.7	-1.22326	0.98247	0.23155	0.16566	644.7	0.01268	0.00944	0.00842	0.008
644.6	-1.23622	0.5299	0.21439	0.23739	644.6	0.01271	0.00941	0.00844	0.008
644.5	-1.43913	0.72606	0.47867	0.18837	644.5	0.01272	0.0094	0.00846	0.00797
644.4	-1.15029	0.94925	0.43398	0.15909	644.4	0.01275	0.00946	0.00847	0.00796
644.3	-1.53436	0.76087	0.12848	0.29933	644.3	0.01277	0.00944	0.00848	0.00797
644.2	-1.76622	0.83607	-0.32485	0.15842	644.2	0.01278	0.00945	0.00852	0.00799
644.1	-1.48911	0.46674	-0.02066	-0.11622	644.1	0.01279	0.00945	0.00854	0.00799
644	-0.7566	0.1152	0.1225	0.05184	644	0.01283	0.00947	0.0086	0.00797
643.9	-0.86899	0.14529	0.24199	0.14529	643.9	0.01286	0.00947	0.0086	0.00801
643.8	-0.53211	0.21222	0.39787	0.31155	643.8	0.01291	0.00951	0.0086	0.008
643.7	-0.58209	0.14936	0.42551	0.11362	643.7	0.01291	0.00953	0.00859	0.008
643.6	-0.64839	0.03029	0.65271	0.27678	643.6	0.01295	0.00956	0.00858	0.00802
643.5	-0.26436	0.06958	0.88358	0.51508	643.5	0.01297	0.00959	0.00859	0.008
643.4	0.04131	0.28548	0.8167	0.85303	643.4	0.013	0.00955	0.00862	0.00801
643.3	0.0142	0.46567	0.75877	0.71653	643.3	0.01298	0.00956	0.00861	0.00803
643.2	-0.10351	0.47646	1.1652	0.60558	643.2	0.01299	0.00956	0.00858	0.00803
643.1	0.09221	0.78486	1.2246	0.71509	643.1	0.01301	0.00959	0.00859	0.00803
643	-0.14585	1.05041	1.51601	0.86096	643	0.01301	0.00963	0.0086	0.00802
642.9	-0.06479	1.12478	1.62305	1.15228	642.9	0.01302	0.00964	0.00862	0.00801
642.8	0.16878	0.91236	1.46314	1.13424	642.8	0.01305	0.00965	0.00864	0.00803
642.7	-0.18947	0.87616	1.22275	1.01297	642.7	0.01305	0.00967	0.00862	0.00805
642.6	0.13633	0.98629	0.75979	1.25708	642.6	0.01309	0.00966	0.00863	0.00804
642.5	0.3105	0.83348	0.39417	1.17267	642.5	0.01312	0.00969	0.00867	0.00801
642.4	0.73309	0.86998	0.05569	1.37428	642.4	0.01313	0.00974	0.00871	0.00805
642.3	0.89135	0.52725	-0.16074	1.47208	642.3	0.01314	0.00973	0.00874	0.00803
642.2	0.43545	0.27926	-0.34426	1.72164	642.2	0.01313	0.00979	0.00876	0.008
642.1	0.1916	0.41755	-0.16344	1.46589	642.1	0.01316	0.00985	0.00878	0.00797
642	0.3367	0.57617	-0.3219	1.41294	642	0.01316	0.00985	0.00878	0.00797
641.9	-0.04185	0.41366	-0.23398	1.10862	641.9	0.01318	0.00989	0.00877	0.00799
641.8	0.2332	0.20414	-0.22927	1.49558	641.8	0.0132	0.00993	0.00874	0.00802
641.7	0.44196	0.52817	-0.20874	1.62289	641.7	0.01321	0.00997	0.00876	0.008
641.6	0.57776	0.14155	-0.50419	1.95648	641.6	0.01325	0.00994	0.0088	0.008
641.5	0.62156	0.00923	-0.57464	1.93355	641.5	0.01326	0.00999	0.00879	0.00796
641.4	1.05928	0.24089	-0.69147	2.10546	641.4	0.01326	0.01002	0.00879	0.00796
641.3	1.6343	0.39906	-0.11696	2.4175	641.3	0.01326	0.01002	0.0088	0.00792
641.2	1.79894	0.6013	-0.02003	2.62431	641.2	0.01327	0.0101	0.00882	0.00798
641.1	1.01879	0.06727	0.14241	2.73157	641.1	0.01328	0.01007	0.00884	0.00798
641	1.55386	0.15452	0.43733	2.43492	641	0.01331	0.01011	0.00885	0.00799
640.9	1.51788	0.05481	0.41722	2.68084	640.9	0.01334	0.0101	0.00884	0.00802
640.8	1.50242	0.12243	0.42759	2.8411	640.8	0.01335	0.01004	0.00884	0.00808
640.7	0.82746	0.4264	0.33008	2.83379	640.7	0.01336	0.01007	0.00883	0.00807
640.6	1.13439	0.58158	0.46314	2.2468	640.6	0.01337	0.0101	0.00882	0.00806
640.5	0.32664	0.26267	0.29235	2.19098	640.5	0.01337	0.01013	0.00887	0.00807
640.4	0.31881	0.35989	0.03213	1.93852	640.4	0.01339	0.01018	0.0089	0.00809
640.3	0.58147	0.20778	0.04367	1.74646	640.3	0.01341	0.01018	0.00889	0.00813
640.2	-0.30271	-0.03329	-0.26434	1.91068	640.2	0.01346	0.01017	0.00891	0.00813
640.1	-0.14117	-0.28005	0.10475	1.74914	640.1	0.01347	0.01019	0.00893	0.00814
640	-0.26786	0.14988	-0.0243	1.48967	640	0.01348	0.01019	0.00895	0.00816
639.9	-0.23526	0.06104	0.08488	1.8229	639.9	0.01353	0.01022	0.00896	0.00817
639.8	-0.64226	-0.11352	-0.59102	2.41818	639.8	0.01356	0.01024	0.00897	0.00821
639.7	-0.18466	-0.06437	-0.74975	2.208	639.7	0.01358	0.01025	0.00897	0.00825
639.6	-0.33153	0.29244	-0.95629	1.91119	639.6	0.01361	0.01023	0.00899	0.00824
639.5	-0.43862	0.33283	-0.80768	2.21496	639.5	0.0136	0.01024	0.00902	0.00831
639.4	-0.12361	0.13702	-0.28601	2.02228	639.4	0.01365	0.01028	0.00899	0.00828
639.3	0.33103	0.0257	-0.62203	1.74366	639.3	0.01366	0.01031	0.00903	0.00828
639.2	0.11412	0.48131	-0.73287	1.60722	639.2	0.01367	0.01036	0.00906	0.00834
639.1	-0.119	0.94473	-0.31131	1.65906	639.1	0.01369	0.01035	0.00905	0.00835
639	0.00542	1.07399	-0.35534	1.54978	639	0.01372	0.01036	0.00904	0.00838
638.9	0.28722	1.18045	-0.40442	1.65665	638.9	0.01375	0.01032	0.00908	0.00842
638.8	-0.07994	0.9889	-0.34978	1.36218	638.8	0.01376	0.01032	0.0091	0.00845
638.7	-0.30911	0.66695	-0.43723	1.21211	638.7	0.01379	0.01033	0.00911	0.00845
638.6	0.1114	0.78501	-0.30354	1.4041	638.6	0.01379	0.01034	0.00914	0.00847
638.5	0.44239	1.06354	-0.28469	1.44689	638.5	0.0138	0.01038	0.00918	0.00847
638.4	0.30764	0.8958	-0.37649	1.21856	638.4	0.01383	0.0104	0.0092	0.00846
638.3	0.62076	0.6333	-0.15306	1.15749	638.3	0.01383	0.01043	0.0092	0.00849
638.2	0.53895	0.41493	0.09089	1.42349	638.2	0.01387	0.01042	0.00924	0.00851
638.1	0.35942	0.08514	0.06056	1.52211	638.1	0.0139	0.01041	0.00926	0.00853
638	-0.06092	-0.15672	0.02019	1.17825	638	0.01397	0.01043	0.0093	0.00856
637.9	-0.34232	-0.59034	0.19629	0.74224	637.9	0.01398	0.0104	0.0093	0.00858
637.8	-0.12622	-0.32136	0.37586	0.82349	637.8	0.01399	0.01041	0.00933	0.00864
637.7	-0.13163	-0.46275	0.30634	0.88916	637.7	0.01404	0.01042	0.00937	0.00863
637.6	-0.00112	-0.65644	0.2648	0.90446	637.6	0.01407	0.01041	0.00939	0.00863
637.5	0.09211	-0.71115	0.5299	0.94329	637.5	0.01408	0.01044	0.0094	0.00863
637.4	0.39703	-0.53625	0.6138	1.24203	637.4	0.01411	0.01049	0.00941	0.00864
637.3	-0.0932	-0.54355	0.5859	1.55914	637.3	0.01413	0.01049	0.00943	0.00866
637.2	0.24107	-0.71677	0.39809	1.62818	637.2	0.01414	0.01047	0.00942	0.00869
637.1	0.68288	-0.82813	0.73191	1.63322	637.1	0.01417	0.01047	0.00944	0.00872
637	0.36767	-0.58303	0.83418	1.97598	637	0.01418	0.0105	0.00951	0.0087
636.9	0.34685	-0.73894	0.66417	1.40112	636.9	0.01416	0.01055	0.00951	0.00873
636.8	0.66876	-0.69913	0.41095	1.27281	636.8	0.01417	0.01056	0.00951	0.00877
636.7	0.73868	-0.77036	0.61815	1.55089	636.7	0.01425	0.01058	0.0095	0.00876
636.6	0.35717	-0.43237	0.5758	1.30742	636.6	0.01427	0.01062	0.00952	0.00879
636.5	0.59373	-0.67097	0.55002	0.95	636.5	0.01424	0.01064	0.00953	0.00879
636.4	0.67237	-0.98853	0.60928	0.75742	636.4	0.01426	0.01064	0.00954	0.00881
636.3	0.61693	-1.09874	0.80853	0.5799	636.3	0.01431	0.01069	0.00955	0.00884
636.2	0.87189	-0.9833	0.70355	0.12971	636.2	0.01433	0.01068	0.00954	0.00882
636.1	0.65739	-0.79981	0.43672	-0.1058	636.1	0.01434	0.01069	0.00956	0.00887
636	0.72212	-0.59032	0.824	0.25534	636	0.01436	0.01067	0.00957	0.00891
635.9	1.07023	-1.12181	0.933	0.09535	635.9	0.01438	0.01071	0.00954	0.00891
635.8	1.5038	-1.51566	0.88416	0.00415	635.8	0.01439	0.01073	0.00954	0.0089
635.7	1.20896	-1.58502	0.83514	-0.10765	635.7	0.01443	0.01075	0.00952	0.00889
635.6	1.04686	-1.65681	1.21597	-0.13167	635.6	0.01445	0.01078	0.0095	0.0089
635.5	1.50768	-2.02751	1.24598	0.1134	635.5	0.01449	0.01078	0.00949	0.00896
635.4	1.94137	-1.90038	1.41449	0.12936	635.4	0.01453	0.01082	0.00955	0.009
635.3	1.63966	-1.84794	1.2347	0.04158	635.3	0.01457	0.01083	0.00955	0.00901
635.2	1.84477	-1.73942	1.00529	-0.02752	635.2	0.0146	0.01081	0.00958	0.00902
635.1	2.22086	-1.66644	1.62873	0.35211	635.1	0.01462	0.01078	0.00958	0.00906
635	2.2967	-1.31572	1.31913	0.49068	635	0.01465	0.01082	0.00958	0.00906
634.9	2.78902	-0.89299	1.34408	0.30317	634.9	0.01464	0.01085	0.00959	0.00912
634.8	2.99091	-0.48613	1.37491	0.33306	634.8	0.01463	0.01089	0.00963	0.00913
634.7	3.0973	0.1617	1.21507	0.36414	634.7	0.01464	0.01091	0.00963	0.00914
634.6	2.99286	0.44349	1.35032	0.5254	634.6	0.01467	0.01099	0.00964	0.00913
634.5	3.33575	0.13021	1.01267	0.37259	634.5	0.0147	0.011	0.00963	0.00912
634.4	3.12593	0.21266	0.69035	0.54876	634.4	0.01471	0.01104	0.0096	0.00913
634.3	3.02079	0.18059	0.6303	0.36526	634.3	0.01473	0.0111	0.00963	0.00915
634.2	2.94191	0.283	0.19511	0.17633	634.2	0.01477	0.01112	0.00963	0.00916
634.1	2.63219	0.62801	-0.01293	-0.29211	634.1	0.0148	0.01112	0.00963	0.0092
634	2.67585	0.39381	-0.21237	-0.08861	634	0.01484	0.0111	0.00965	0.00923
633.9	2.719	0.85987	-0.37618	-0.21086	633.9	0.01486	0.01117	0.00969	0.0092
633.8	2.85342	0.72342	-0.2071	-0.09963	633.8	0.01491	0.01116	0.00971	0.00919
633.7	2.99893	0.57091	0.05702	-0.4009	633.7	0.01494	0.01113	0.0097	0.00921
633.6	3.30911	0.83922	0.43639	0.2112	633.6	0.015	0.01112	0.00972	0.00922
633.5	2.97018	0.56213	0.33038	0.37095	633.5	0.01503	0.01115	0.00976	0.0092
633.4	2.84609	0.43666	0.06058	0.0142	633.4	0.01503	0.01119	0.0098	0.00923
633.3	2.71091	-0.02884	0.285	0.28477	633.3	0.01506	0.0112	0.00982	0.00926
633.2	3.16838	0.08836	0.25737	0.35949	633.2	0.01509	0.01122	0.00987	0.00923
633.1	3.56168	0.34484	0.15509	0.46048	633.1	0.0151	0.01124	0.00988	0.00924
633	3.7406	0.17259	0.17878	0.94865	633	0.0151	0.01121	0.0099	0.00924
632.9	3.15207	0.3705	0.28235	0.81519	632.9	0.01514	0.01122	0.0099	0.00928
632.8	3.86866	0.46608	0.51252	0.64772	632.8	0.01515	0.01121	0.0099	0.00929
632.7	3.60349	0.07168	-0.06239	0.52745	632.7	0.01518	0.01127	0.00994	0.00929
632.6	3.49247	0.01707	-0.06403	0.96302	632.6	0.0152	0.01128	0.00998	0.00931
632.5	3.0972	0.50298	0.09278	1.05347	632.5	0.01521	0.0113	0.01002	0.00929
632.4	3.19375	0.16167	0.4978	1.05217	632.4	0.01522	0.01131	0.0101	0.00935
632.3	3.36588	0.33042	0.54499	1.18132	632.3	0.01524	0.01131	0.01013	0.00934
632.2	3.22669	0.2686	0.4482	0.93605	632.2	0.01525	0.01132	0.01015	0.00934
632.1	3.8882	0.65477	0.22796	0.68393	632.1	0.01529	0.0113	0.01013	0.00936
632	3.48895	0.76109	0.19008	0.55728	632	0.01532	0.0113	0.01015	0.00933
631.9	3.80903	0.25832	0.06288	0.72809	631.9	0.01537	0.01132	0.01012	0.00936
631.8	3.4852	-0.11943	0.22586	0.90707	631.8	0.01538	0.01133	0.01015	0.0094
631.7	3.1691	0.00278	0.09061	0.82035	631.7	0.01537	0.01132	0.01021	0.00939
631.6	2.98237	0.00798	0.13041	0.78078	631.6	0.01544	0.01131	0.01022	0.00942
631.5	2.1833	0.06249	-0.44398	0.74821	631.5	0.01545	0.01129	0.01023	0.00941
631.4	2.0594	-0.47365	-0.30177	0.39747	631.4	0.01549	0.01129	0.01025	0.00943
631.3	2.06304	-0.82965	-0.33715	0.49176	631.3	0.01547	0.01131	0.01023	0.00944
631.2	2.55259	-0.75551	-0.47526	0.52945	631.2	0.0155	0.01133	0.0103	0.00946
631.1	2.51041	-1.05747	-0.17262	0.71407	631.1	0.0155	0.01136	0.01034	0.00946
631	2.75428	-1.04169	-0.42202	0.51559	631	0.01552	0.01138	0.01033	0.00945
630.9	2.60382	-0.80065	-0.5726	1.02172	630.9	0.0155	0.01141	0.01033	0.00947
630.8	2.73661	-1.34053	-0.24549	1.30371	630.8	0.01553	0.0114	0.01036	0.0095
630.7	3.01948	-1.14351	0.04202	1.31836	630.7	0.01556	0.01137	0.0104	0.00953
630.6	3.43373	-1.16492	0.85289	1.38308	630.6	0.01559	0.01142	0.01039	0.00956
630.5	3.23214	-0.92142	0.61689	1.07247	630.5	0.01559	0.01141	0.0104	0.0096
630.4	3.18608	-0.82289	0.16489	1.04692	630.4	0.01561	0.01143	0.01041	0.0096
630.3	2.8486	-0.69233	0.32047	0.92977	630.3	0.01559	0.01146	0.01041	0.0096
630.2	2.9692	-0.8081	0.64798	0.80225	630.2	0.0156	0.01145	0.0104	0.00962
630.1	3.26418	-1.03554	0.98179	0.86769	630.1	0.01564	0.0114	0.01039	0.00965
630	3.31754	-0.63317	0.72725	0.71288	630	0.01566	0.0114	0.01039	0.00967
629.9	3.38273	-1.0104	0.68622	0.68141	629.9	0.01569	0.01142	0.01042	0.00968
629.8	2.4008	-0.84835	0.9146	0.69354	629.8	0.01569	0.01146	0.01043	0.00971
629.7	1.68356	-0.95532	0.67075	0.4973	629.7	0.01577	0.01149	0.01042	0.00976
629.6	1.51191	-1.04899	0.53282	0.69851	629.6	0.01578	0.01151	0.01046	0.00974
629.5	1.20812	-1.36985	0.62626	1.02601	629.5	0.0158	0.01155	0.01049	0.00978
629.4	1.22896	-1.18894	0.31677	1.37793	629.4	0.01582	0.01157	0.01052	0.00979
629.3	1.80405	-1.09774	0.37997	1.0883	629.3	0.01584	0.01158	0.01053	0.0098
629.2	1.83819	-1.48306	0.11293	0.86967	629.2	0.01588	0.01157	0.01055	0.0098
629.1	1.71305	-1.65716	-0.01497	0.81529	629.1	0.01591	0.01163	0.01052	0.00982
629	1.35537	-1.42283	-0.16142	0.78312	629	0.01591	0.01165	0.01053	0.00982
628.9	1.32199	-1.28295	-0.39346	0.83159	628.9	0.01593	0.01161	0.01054	0.00981
628.8	1.10316	-1.12717	-0.03567	1.35427	628.8	0.01595	0.01166	0.01053	0.00983
628.7	1.39742	-1.40495	-0.13582	1.52844	628.7	0.01597	0.01174	0.01053	0.00987
628.6	1.38341	-1.07924	-0.43066	1.3782	628.6	0.01598	0.01177	0.01057	0.00989
628.5	1.10577	-0.38386	-0.36476	1.20056	628.5	0.01602	0.01179	0.01057	0.00991
628.4	1.22483	-0.54556	-0.82145	0.80766	628.4	0.01607	0.01185	0.01057	0.00988
628.3	1.3746	-0.68814	-0.73922	0.19753	628.3	0.01612	0.01186	0.01057	0.00988
628.2	1.90352	-0.939	-0.73842	0.17418	628.2	0.01615	0.01196	0.01058	0.00988
628.1	1.67519	-0.67362	-0.96931	0.598	628.1	0.01618	0.01198	0.01061	0.00989
628	2.03673	-0.28759	-0.97158	0.80439	628	0.01624	0.01201	0.01063	0.00991
627.9	1.48936	-0.1524	-1.10614	0.82035	627.9	0.01626	0.01203	0.01061	0.0099
627.8	1.16781	0.33749	-0.87151	1.04926	627.8	0.01629	0.01206	0.01061	0.00993
627.7	1.50625	0.38749	-0.71077	0.72458	627.7	0.01637	0.01208	0.0106	0.00995
627.6	1.07589	0.3893	-0.60095	0.52121	627.6	0.01641	0.01215	0.01065	0.00998
627.5	0.72149	0.62663	-0.87286	0.57553	627.5	0.01643	0.01215	0.01069	0.00997
627.4	0.56519	0.19532	-0.90959	0.62212	627.4	0.01645	0.01218	0.01067	0.00999
627.3	0.15584	0.19477	-1.22287	0.56102	627.3	0.01648	0.01222	0.01071	0.00999
627.2	-0.31721	0.23026	-1.19448	0.72768	627.2	0.01649	0.01227	0.01074	0.00998
627.1	-0.41059	0.19644	-0.80036	1.06502	627.1	0.01656	0.01227	0.01075	0.00999
627	-0.11587	-0.12696	-1.19209	1.11123	627	0.01662	0.01228	0.01079	0.01
626.9	-0.42745	-0.11463	-1.18638	0.90217	626.9	0.01666	0.01233	0.01078	0.01002
626.8	-0.31482	-0.03031	-1.31426	0.9675	626.8	0.01666	0.01235	0.0108	0.01003
626.7	0.10676	0.03749	-1.26377	1.03582	626.7	0.01666	0.01243	0.01084	0.01001
626.6	0.7041	0.64792	-1.47402	1.22289	626.6	0.01668	0.01237	0.01083	0.01002
626.5	0.73875	0.42515	-1.00434	1.30252	626.5	0.01674	0.01239	0.01082	0.00998
626.4	0.4774	0.52452	-0.69563	1.25686	626.4	0.01673	0.01238	0.01086	0.00997
626.3	0.79517	0.82756	-0.81009	1.04752	626.3	0.01676	0.01241	0.01088	0.01
626.2	1.13694	0.69588	-1.01011	1.15801	626.2	0.01682	0.01244	0.0109	0.01001
626.1	1.13346	0.46699	-0.57533	0.63086	626.1	0.01685	0.01246	0.01091	0.01004
626	0.75419	0.57611	-0.33157	0.78464	626	0.01686	0.01248	0.01089	0.01003
625.9	0.58761	1.08797	0.09604	1.23206	625.9	0.01689	0.01251	0.01092	0.01008
625.8	0.56269	1.24307	-0.1754	1.53867	625.8	0.01692	0.01249	0.01093	0.0101
625.7	0.88956	1.05592	0.17474	1.51478	625.7	0.01699	0.01255	0.01093	0.0101
625.6	0.99923	0.79688	0.16949	1.51737	625.6	0.01701	0.01262	0.01094	0.01015
625.5	0.34104	0.5217	0.08053	1.03435	625.5	0.01703	0.01264	0.01098	0.01011
625.4	0.19111	0.72499	0.45143	1.08912	625.4	0.01706	0.0126	0.01103	0.01015
625.3	0.29489	0.41835	0.88519	1.00698	625.3	0.01707	0.0126	0.01103	0.01016
625.2	-0.13989	0.024	1.12321	0.85145	625.2	0.0171	0.01262	0.01106	0.01018
625.1	-0.1049	0.09187	1.30532	0.89457	625.1	0.01713	0.01265	0.01108	0.01021
625	-0.45852	0.38808	1.41257	1.12522	625	0.01712	0.01267	0.01109	0.01018
624.9	-0.71167	0.00198	1.55895	0.77055	624.9	0.01715	0.01266	0.01109	0.01018
624.8	-0.72167	-0.31868	1.9977	0.53537	624.8	0.01717	0.01269	0.0111	0.01023
624.7	-0.64275	-0.20229	2.20858	0.81981	624.7	0.01718	0.0127	0.01114	0.01026
624.6	-0.60815	-0.92784	1.92122	0.81594	624.6	0.01722	0.01269	0.01117	0.01028
624.5	-0.59212	-0.68669	2.36507	0.65584	624.5	0.01727	0.01269	0.0112	0.0103
624.4	-0.267	-0.98113	2.51923	0.48881	624.4	0.01726	0.01266	0.01121	0.01034
624.3	0.07612	-1.51426	2.52682	0.70903	624.3	0.0173	0.01261	0.01124	0.01033
624.2	0.64732	-1.10408	2.95789	0.13913	624.2	0.01731	0.01266	0.01129	0.01034
624.1	0.96248	-0.469	3.02395	0.35891	624.1	0.01734	0.01269	0.01133	0.01038
624	1.13449	-0.25708	2.94776	0.55109	624	0.01738	0.01268	0.01134	0.01043
623.9	0.75417	-0.16601	2.54364	0.98801	623.9	0.0174	0.01272	0.01136	0.01044
623.8	0.40509	-0.06343	2.74217	0.72626	623.8	0.01743	0.01278	0.01137	0.01045
623.7	0.77144	0.08302	3.07337	1.09177	623.7	0.01744	0.01283	0.01141	0.01047
623.6	1.44643	0.04756	2.71578	0.86728	623.6	0.01747	0.01285	0.01142	0.01047
623.5	0.7719	0.01395	2.49318	0.76974	623.5	0.01752	0.0129	0.01143	0.0105
623.4	0.39127	-0.00533	3.06465	0.96499	623.4	0.01756	0.01297	0.01148	0.01049
623.3	0.30806	0.07869	3.71556	1.29587	623.3	0.01756	0.01299	0.01152	0.01053
623.2	0.5775	0.18732	3.45332	0.97486	623.2	0.01761	0.01303	0.01154	0.01053
623.1	1.01853	-0.17066	3.26586	0.64669	623.1	0.01761	0.01304	0.01153	0.01059
623	0.57536	-0.3841	3.20297	1.03294	623	0.01765	0.01307	0.01153	0.01058
622.9	0.6735	-0.81599	3.01871	0.84655	622.9	0.01766	0.01311	0.01154	0.01056
622.8	0.76787	-0.69112	3.18412	0.91884	622.8	0.01771	0.01314	0.01159	0.01057
622.7	1.4153	-0.80269	2.53274	1.1235	622.7	0.01773	0.01315	0.01158	0.01058
622.6	1.33245	-1.15869	2.53535	0.79688	622.6	0.01776	0.01315	0.01164	0.01057
622.5	1.14133	-0.87463	2.13258	0.56885	622.5	0.01777	0.01317	0.01167	0.0106
622.4	1.01392	-0.75174	2.35316	0.65481	622.4	0.01778	0.01316	0.01168	0.01065
622.3	2.04381	-0.73853	2.1814	1.0446	622.3	0.01785	0.0132	0.01171	0.01068
622.2	1.82665	-0.7984	2.14761	1.11391	622.2	0.01788	0.01326	0.0117	0.01066
622.1	1.97235	-0.39518	2.04087	1.62815	622.1	0.01792	0.01327	0.01171	0.01069
622	2.28386	-0.39944	1.86998	1.2403	622	0.01792	0.01328	0.01173	0.0107
621.9	2.88581	-0.5251	1.78084	1.74204	621.9	0.01793	0.01329	0.01174	0.01071
621.8	3.35223	-0.49042	2.05628	1.59255	621.8	0.01798	0.01333	0.01177	0.01077
621.7	3.4033	-0.29968	2.34975	1.75544	621.7	0.01799	0.01333	0.01177	0.01082
621.6	3.01639	-0.42197	1.91987	1.55009	621.6	0.01803	0.01331	0.01178	0.0108
621.5	3.17406	-0.42656	1.99607	1.3314	621.5	0.01805	0.01337	0.01177	0.01082
621.4	3.19271	0.19128	1.72121	1.05545	621.4	0.01806	0.01338	0.0118	0.01085
621.3	2.96442	0.18774	1.19497	0.91904	621.3	0.01808	0.01346	0.01181	0.01086
621.2	2.2843	0.57126	1.2885	1.33046	621.2	0.01813	0.0135	0.01183	0.01088
621.1	2.02962	1.18708	1.52218	1.43344	621.1	0.01812	0.01351	0.01187	0.01092
621	1.98279	0.72838	1.6672	1.50167	621	0.01816	0.01355	0.01187	0.01092
620.9	1.76918	0.33011	1.14014	1.09885	620.9	0.01816	0.01355	0.01187	0.01092
620.8	2.05129	0.24595	1.47613	0.91839	620.8	0.01818	0.01356	0.01189	0.01091
620.7	2.65709	-0.23629	1.29434	0.79938	620.7	0.01818	0.01351	0.01188	0.01095
620.6	3.11834	-0.47389	1.41021	1.02857	620.6	0.01821	0.01351	0.01191	0.01096
620.5	2.83063	-0.25029	1.03274	1.04159	620.5	0.01823	0.0135	0.01192	0.01099
620.4	2.83424	0.39014	1.62909	1.5032	620.4	0.01826	0.01349	0.01196	0.01105
620.3	2.63337	0.37844	1.72569	1.78872	620.3	0.01828	0.0135	0.01198	0.01107
620.2	2.59219	0.37478	0.99263	1.77371	620.2	0.01832	0.01352	0.01197	0.01111
620.1	2.40413	0.25099	1.10885	1.80406	620.1	0.01834	0.01356	0.01198	0.01114
620	1.58952	0.34147	0.70377	2.64325	620	0.01839	0.01362	0.01202	0.01115
619.9	1.66735	0.91261	0.7673	2.67637	619.9	0.01843	0.01365	0.01204	0.01118
619.8	1.68589	1.27711	1.03707	2.89618	619.8	0.01845	0.01367	0.0121	0.01119
619.7	1.8596	1.66144	0.74948	3.23145	619.7	0.01847	0.01365	0.01212	0.01124
619.6	1.90643	1.56543	1.27175	2.98143	619.6	0.01852	0.01376	0.01213	0.01128
619.5	1.71878	2.12055	1.21723	2.97112	619.5	0.01855	0.01374	0.01216	0.01129
619.4	1.80117	2.39976	2.15455	2.94275	619.4	0.01857	0.0138	0.01217	0.0113
619.3	1.63259	2.53363	1.92156	3.22775	619.3	0.0186	0.01382	0.01221	0.01128
619.2	1.23694	2.60388	1.77949	3.41286	619.2	0.01863	0.01381	0.01223	0.01128
619.1	0.69477	2.38519	1.37836	3.1116	619.1	0.01865	0.01383	0.01222	0.01129
619	0.4417	2.5417	1.2764	2.65929	619	0.0187	0.01387	0.01224	0.01131
618.9	0.12417	1.97441	1.17427	2.81135	618.9	0.01873	0.01389	0.01229	0.01131
618.8	-0.02317	2.73716	1.09775	3.01467	618.8	0.01877	0.01391	0.01228	0.01132
618.7	-0.42545	2.79385	0.5712	3.39155	618.7	0.0188	0.01394	0.0123	0.01137
618.6	-0.61069	2.84718	0.50815	3.30341	618.6	0.01882	0.01397	0.0123	0.0114
618.5	-0.67824	3.29314	0.48665	3.58204	618.5	0.01885	0.01399	0.01238	0.01141
618.4	-0.34683	3.47661	0.36105	3.71416	618.4	0.01888	0.01403	0.01243	0.01143
618.3	-0.06588	3.48649	0.76599	3.57887	618.3	0.01889	0.01405	0.01245	0.01142
618.2	-0.13301	3.72969	1.37551	3.3914	618.2	0.01891	0.01401	0.01245	0.01144
618.1	0.63429	3.15835	1.2061	3.78033	618.1	0.01894	0.01402	0.01245	0.01149
618	0.50737	2.9254	1.27722	3.79021	618	0.01897	0.0141	0.0125	0.01148
617.9	0.62618	2.72357	0.61734	3.33733	617.9	0.01899	0.01413	0.0125	0.01152
617.8	0.83743	2.96581	0.40872	3.17628	617.8	0.01903	0.01413	0.0125	0.01155
617.7	0.83636	2.81832	0.43599	3.53651	617.7	0.01906	0.01418	0.01253	0.01157
617.6	0.89286	3.07275	0.56557	3.35119	617.6	0.01912	0.01425	0.01253	0.01158
617.5	1.04463	3.02077	0.66005	3.57627	617.5	0.01916	0.0143	0.01258	0.01163
617.4	0.61488	2.77548	0.20838	3.54128	617.4	0.0192	0.01436	0.01263	0.01163
617.3	0.46562	2.47814	-0.24493	3.41978	617.3	0.01925	0.01441	0.01263	0.01163
617.2	0.53851	2.57041	-0.78882	2.96169	617.2	0.01928	0.01444	0.01264	0.01165
617.1	0.76704	1.9856	-0.5094	2.54695	617.1	0.01932	0.01449	0.01267	0.01166
617	0.53064	1.91556	-0.5991	2.46605	617	0.01934	0.0145	0.01272	0.01166
616.9	0.32594	2.16559	-0.82753	1.97042	616.9	0.01941	0.01453	0.01272	0.01166
616.8	0.76635	1.60718	-0.58945	1.9589	616.8	0.01944	0.01452	0.0127	0.01167
616.7	1.47472	1.87111	-0.40741	1.76128	616.7	0.01948	0.01455	0.01273	0.01165
616.6	1.44615	1.87089	-0.35687	1.43348	616.6	0.01952	0.01452	0.01275	0.01165
616.5	1.1146	2.12374	-0.61407	0.84416	616.5	0.01959	0.01455	0.01276	0.01163
616.4	0.41839	2.13373	-0.55614	0.98345	616.4	0.0196	0.01453	0.01282	0.01165
616.3	0.51283	2.366	-0.51719	0.65808	616.3	0.01963	0.01454	0.0128	0.01165
616.2	0.74292	2.55055	-1.3704	0.47334	616.2	0.01967	0.01452	0.01285	0.01165
616.1	1.11081	2.55148	-1.33086	0.27965	616.1	0.01967	0.0146	0.01285	0.01172
616	1.00957	2.75005	-1.51821	-0.14805	616	0.0197	0.01468	0.01287	0.01171
615.9	1.65511	2.85913	-0.94839	-0.14828	615.9	0.01973	0.01471	0.01289	0.01173
615.8	2.0687	2.70857	-0.77108	0.13834	615.8	0.01974	0.01474	0.0129	0.01174
615.7	2.44397	2.64842	-0.77474	0.18502	615.7	0.01977	0.0148	0.01291	0.01178
615.6	2.67406	2.3998	-0.67373	0.06286	615.6	0.0198	0.01484	0.01296	0.01181
615.5	2.39305	2.00655	-0.50883	-0.43439	615.5	0.01986	0.01485	0.01298	0.01182
615.4	2.27099	1.77109	-0.56918	-0.35161	615.4	0.01989	0.01485	0.01301	0.0118
615.3	1.74152	1.49288	-0.84425	-0.57406	615.3	0.01997	0.01488	0.01303	0.01182
615.2	2.20854	1.72014	-0.78544	-0.61256	615.2	0.02	0.0149	0.01306	0.01183
615.1	2.16919	1.13006	-1.01903	-0.686	615.1	0.02004	0.01492	0.01308	0.01185
615	2.79961	1.33152	-1.59548	-0.46051	615	0.02007	0.01497	0.01309	0.01185
614.9	1.91992	1.26195	-1.60933	-0.59028	614.9	0.02008	0.01503	0.01312	0.01183
614.8	2.12398	1.6303	-1.415	-1.01815	614.8	0.02011	0.01505	0.01313	0.01183
614.7	2.11394	1.41571	-1.11598	-0.73398	614.7	0.02014	0.01507	0.01318	0.01185
614.6	1.68147	1.44756	-1.16867	-0.33398	614.6	0.02017	0.01508	0.01319	0.01185
614.5	1.92339	1.66947	-1.02643	-0.37233	614.5	0.02025	0.01513	0.01324	0.01186
614.4	2.06878	2.22974	-1.00602	-0.72717	614.4	0.02028	0.01517	0.01328	0.01188
614.3	1.88596	2.20557	-1.14472	-0.55967	614.3	0.02029	0.01522	0.01327	0.01187
614.2	1.27569	2.79036	-0.72047	-0.76843	614.2	0.02031	0.01521	0.01327	0.01188
614.1	0.85342	2.70744	-0.3991	-0.77973	614.1	0.02032	0.01522	0.01325	0.01193
614	0.97159	2.51249	-0.42872	-0.51883	614	0.02035	0.01528	0.01331	0.01196
613.9	0.45493	2.49539	-0.25931	-0.34625	613.9	0.02039	0.01527	0.01331	0.01198
613.8	0.84219	2.76143	-0.10654	-0.50318	613.8	0.02042	0.01528	0.01333	0.01198
613.7	1.6939	2.76344	0.31014	-0.25236	613.7	0.02046	0.01536	0.01335	0.012
613.6	2.08945	2.39206	-0.27482	-0.30454	613.6	0.02047	0.01534	0.01339	0.012
613.5	1.67756	2.26681	-0.35958	-0.74522	613.5	0.02049	0.01536	0.01342	0.01204
613.4	1.42769	1.52471	-0.48178	-0.74511	613.4	0.02053	0.01543	0.01344	0.0121
613.3	1.51117	1.27644	-0.67016	-0.85239	613.3	0.02057	0.01548	0.01348	0.01214
613.2	2.2202	0.83742	-0.84576	-0.39529	613.2	0.02058	0.01551	0.01348	0.01217
613.1	2.02292	0.71862	-0.84321	0.16361	613.1	0.02062	0.01556	0.0135	0.01218
613	1.31769	0.16515	-1.36053	0.17456	613	0.02069	0.0156	0.01348	0.01222
612.9	1.43553	-0.51391	-0.9155	-0.056	612.9	0.02074	0.01559	0.01351	0.01224
612.8	1.18962	-0.48884	-0.75367	-0.39777	612.8	0.02075	0.0156	0.01352	0.01228
612.7	1.4906	-0.77796	-0.80678	-0.43887	612.7	0.0208	0.0156	0.01357	0.01228
612.6	1.33498	-0.68263	-0.57704	-0.11652	612.6	0.02083	0.01564	0.01361	0.01234
612.5	1.53683	-0.52761	-0.50188	-0.05664	612.5	0.02084	0.01565	0.01369	0.01235
612.4	0.8274	0.07015	-0.15428	0.04409	612.4	0.02088	0.01561	0.0137	0.01236
612.3	1.1374	-0.0805	0.3751	-0.57115	612.3	0.02093	0.01564	0.01371	0.01235
612.2	0.92443	0.32438	0.13436	-0.31477	612.2	0.02092	0.01565	0.01373	0.01236
612.1	1.0819	0.74994	0.17711	-0.54152	612.1	0.02097	0.01573	0.01383	0.01236
612	1.53943	0.74863	1.2303	-0.58084	612	0.021	0.01578	0.01382	0.01239
611.9	1.86342	0.84553	0.83889	-0.4768	611.9	0.02102	0.01582	0.0138	0.01241
611.8	1.99132	1.25982	1.02868	-0.66805	611.8	0.02105	0.01585	0.0138	0.01245
611.7	1.72751	1.19684	1.09061	0.29434	611.7	0.02107	0.01584	0.01381	0.01247
611.6	1.60608	1.12137	1.02694	-0.13869	611.6	0.02113	0.01585	0.01386	0.0125
611.5	2.36513	1.49606	1.52908	-0.32607	611.5	0.02116	0.0158	0.01387	0.01254
611.4	2.1053	1.35343	1.35821	-0.07558	611.4	0.0212	0.01577	0.01388	0.01256
611.3	2.26326	1.36751	1.00087	-0.55594	611.3	0.02125	0.01577	0.01385	0.0126
611.2	2.36152	0.83645	1.52478	-0.38445	611.2	0.02126	0.01582	0.01385	0.01261
611.1	1.56767	0.59637	1.49421	-0.47918	611.1	0.02129	0.01585	0.01389	0.01264
611	1.13868	0.23636	1.70495	-0.65729	611	0.02132	0.01589	0.01392	0.01268
610.9	1.52972	0.3179	1.89407	-0.53313	610.9	0.02138	0.0159	0.01398	0.0127
610.8	1.13745	-0.32682	2.20369	-0.79031	610.8	0.02145	0.01593	0.01403	0.01271
610.7	1.95471	-0.20663	2.03012	-0.2855	610.7	0.0215	0.01593	0.0141	0.01271
610.6	2.5137	0.13282	2.0046	-0.56061	610.6	0.02154	0.01594	0.01413	0.01271
610.5	2.6486	-0.25036	1.7094	-0.7939	610.5	0.02158	0.01599	0.01415	0.01273
610.4	2.32708	-0.12494	1.5307	-0.35257	610.4	0.02161	0.016	0.01424	0.01275
610.3	1.77926	-0.40273	1.35115	-0.78677	610.3	0.02165	0.01597	0.01421	0.01278
610.2	1.62957	0.05959	2.411	-0.57017	610.2	0.02169	0.01602	0.01424	0.0128
610.1	1.9323	0.57453	2.70267	-0.7428	610.1	0.02175	0.01606	0.01427	0.01281
610	2.08369	1.51136	3.03364	-0.57991	610	0.02178	0.01609	0.0143	0.01281
609.9	1.61411	1.5393	3.20186	-0.48019	609.9	0.02178	0.01611	0.01429	0.01282
609.8	1.79887	1.78761	3.37494	-0.45125	609.8	0.02183	0.01615	0.01435	0.01288
609.7	2.28929	1.8879	3.41519	-0.49974	609.7	0.02186	0.01614	0.01438	0.01291
609.6	2.07187	1.8353	3.91747	-0.23668	609.6	0.02191	0.01612	0.01441	0.01291
609.5	2.34969	1.49662	3.31165	-0.20722	609.5	0.02193	0.01621	0.0144	0.01294
609.4	2.42381	2.04764	3.49992	0.33711	609.4	0.02198	0.01628	0.01444	0.01293
609.3	2.31309	1.80746	3.88311	0.28178	609.3	0.02201	0.0163	0.01448	0.01296
609.2	1.99233	1.79011	3.36177	0.30222	609.2	0.02209	0.01633	0.0145	0.01301
609.1	1.03238	1.79537	3.35393	0.33207	609.1	0.02211	0.01634	0.01447	0.01303
609	0.91711	1.40513	3.15444	0.14812	609	0.02211	0.0164	0.01453	0.0131
608.9	0.5756	1.13822	2.86183	0.65841	608.9	0.02217	0.01643	0.01454	0.01313
608.8	0.7905	1.26357	2.9172	0.59154	608.8	0.0222	0.01646	0.01457	0.01316
608.7	1.19202	0.77963	2.65115	1.3474	608.7	0.02222	0.01644	0.01457	0.01323
608.6	0.65393	1.04878	2.40857	1.86193	608.6	0.02226	0.01645	0.01461	0.01324
608.5	0.83663	0.31177	2.27149	1.57509	608.5	0.02232	0.01648	0.01466	0.01321
608.4	0.22992	0.27123	2.472	1.75296	608.4	0.02236	0.01653	0.01472	0.01328
608.3	0.3986	0.35921	2.43328	1.1781	608.3	0.0224	0.01657	0.01476	0.01331
608.2	0.19891	0.02754	2.40167	1.5351	608.2	0.02245	0.01661	0.01479	0.01336
608.1	-0.51583	-0.30698	2.2994	2.03505	608.1	0.02252	0.01665	0.01484	0.0134
608	-0.70927	-0.04784	2.43559	2.36007	608	0.02256	0.01673	0.01487	0.01342
607.9	-1.15198	-0.24493	2.67852	2.48498	607.9	0.02261	0.01674	0.0149	0.01344
607.8	-1.02001	-0.03463	2.71674	2.87464	607.8	0.02266	0.01675	0.01494	0.01344
607.7	-0.80219	0.15319	2.46612	3.35848	607.7	0.02267	0.01677	0.01497	0.01352
607.6	-1.09549	-0.15773	2.89175	3.62995	607.6	0.02269	0.01679	0.01498	0.01351
607.5	-0.71028	0.2756	2.29855	3.74909	607.5	0.02271	0.01686	0.015	0.01355
607.4	-0.45572	0.08134	2.48333	3.40176	607.4	0.02276	0.0169	0.01501	0.01359
607.3	-0.63164	0.32275	2.70773	3.09987	607.3	0.0228	0.01695	0.01501	0.01358
607.2	-1.4694	0.59576	2.4246	3.19024	607.2	0.02282	0.01696	0.01502	0.01362
607.1	-1.17768	0.68903	2.66807	3.01546	607.1	0.02285	0.017	0.01501	0.01361
607	-0.695	0.8403	3.33259	3.36443	607	0.02289	0.01707	0.01504	0.0137
606.9	-1.03099	0.37751	2.83696	3.56212	606.9	0.02291	0.0171	0.0151	0.01373
606.8	-1.11098	0.20731	2.30307	4.3888	606.8	0.02296	0.01713	0.01513	0.01372
606.7	-1.41242	-0.1045	2.51177	4.04215	606.7	0.02299	0.01714	0.01514	0.01376
606.6	-1.16941	-0.256	2.53814	4.0328	606.6	0.02305	0.01718	0.01518	0.01378
606.5	-1.71881	-0.62806	2.50013	3.93744	606.5	0.02311	0.01724	0.01519	0.01377
606.4	-2.01327	-0.65914	2.36342	3.65234	606.4	0.02313	0.01725	0.01525	0.01377
606.3	-1.34676	-0.76214	1.78568	3.85392	606.3	0.02315	0.01731	0.01532	0.01378
606.2	-1.00063	-0.20955	1.97549	3.77028	606.2	0.02315	0.01728	0.01536	0.01382
606.1	-1.46613	-0.42687	1.83394	3.61299	606.1	0.02322	0.01731	0.01541	0.01388
606	-1.39465	-0.60994	1.9658	3.60796	606	0.02324	0.01732	0.01541	0.01391
605.9	-1.42193	-0.90469	2.48584	3.26149	605.9	0.02331	0.01736	0.01541	0.01391
605.8	-0.9176	-0.82582	2.73519	3.45753	605.8	0.02338	0.01741	0.01549	0.0139
605.7	-0.14936	-0.8737	2.64465	3.36718	605.7	0.02342	0.01745	0.0155	0.01395
605.6	-0.11819	-1.11648	2.09383	2.98641	605.6	0.02348	0.01751	0.01549	0.01397
605.5	0.48094	-1.28305	2.67542	2.6087	605.5	0.02351	0.01751	0.01555	0.01399
605.4	0.41882	-0.82831	2.63199	1.89986	605.4	0.02355	0.01755	0.01557	0.01399
605.3	0.89582	-0.38654	2.80171	1.93406	605.3	0.02357	0.01758	0.0156	0.01403
605.2	0.49019	-0.24862	3.15342	2.02675	605.2	0.02363	0.0176	0.01565	0.01407
605.1	-0.55645	-0.38765	3.51101	1.89528	605.1	0.02369	0.01763	0.01568	0.01407
605	-0.65176	-1.15138	3.3849	2.40071	605	0.02373	0.01765	0.01571	0.01406
604.9	-0.18483	-0.59622	3.06002	1.78613	604.9	0.02379	0.01769	0.01575	0.01405
604.8	0.45178	-0.90845	3.01205	1.28893	604.8	0.02382	0.01772	0.01576	0.01409
604.7	0.85112	0.08233	3.1078	1.64325	604.7	0.02385	0.01779	0.01581	0.01409
604.6	0.5782	-0.06756	2.89881	1.22555	604.6	0.0239	0.01783	0.01583	0.01413
604.5	0.77324	-0.45573	2.50728	0.93015	604.5	0.02392	0.0179	0.01585	0.01408
604.4	0.9542	-0.06235	2.49014	1.13664	604.4	0.02401	0.01796	0.01587	0.01413
604.3	1.00497	0.04072	2.56827	0.93948	604.3	0.02404	0.01795	0.01591	0.01416
604.2	0.16693	-0.08522	2.58168	1.27658	604.2	0.02406	0.01799	0.01595	0.01418
604.1	0.26454	-1.26619	2.62939	0.29299	604.1	0.02408	0.01803	0.01599	0.01423
604	0.1042	-1.13398	3.01238	0.7241	604	0.02414	0.01803	0.01603	0.01426
603.9	0.15013	-1.4007	2.26613	0.82295	603.9	0.02418	0.01804	0.01609	0.0143
603.8	-0.10678	-1.07043	2.15811	0.66778	603.8	0.02426	0.01807	0.01614	0.01431
603.7	0.97123	-0.82591	2.05992	0.46779	603.7	0.02432	0.0181	0.01613	0.01433
603.6	1.00048	-1.35243	2.3542	0.30304	603.6	0.02439	0.01814	0.0161	0.01439
603.5	1.28828	-1.52468	2.04509	0.40789	603.5	0.02445	0.01819	0.01615	0.01443
603.4	1.29834	-1.1265	2.10402	0.63705	603.4	0.0245	0.0182	0.01617	0.01447
603.3	1.58322	-0.57882	2.22972	1.0766	603.3	0.02455	0.01821	0.01621	0.01454
603.2	1.44785	-0.70002	2.00565	0.83621	603.2	0.02462	0.01826	0.01624	0.01458
603.1	1.72385	-0.73866	2.66227	1.11311	603.1	0.02467	0.01831	0.01624	0.01456
603	0.67474	-0.75931	3.44035	1.35442	603	0.02476	0.01838	0.01626	0.01461
602.9	0.7206	-0.7883	3.04936	0.99629	602.9	0.02479	0.01842	0.01624	0.01463
602.8	0.52344	-1.19568	3.09312	1.09868	602.8	0.02487	0.01845	0.01627	0.01465
602.7	0.67451	-1.23312	2.61647	1.25664	602.7	0.02492	0.0185	0.0163	0.01465
602.6	0.83155	-0.70909	2.53904	1.14053	602.6	0.02495	0.01852	0.01627	0.0147
602.5	0.9967	-0.64374	2.96009	1.84092	602.5	0.025	0.01855	0.01629	0.0147
602.4	0.71619	-0.38307	3.23456	1.82986	602.4	0.02502	0.0186	0.01635	0.01474
602.3	-0.04982	-0.40549	2.57856	1.97322	602.3	0.02505	0.01862	0.01636	0.01474
602.2	0.11627	-1.05797	2.34166	2.20652	602.2	0.0251	0.01868	0.01639	0.01477
602.1	-0.05818	-1.26488	2.27117	1.78488	602.1	0.02516	0.01871	0.01641	0.01476
602	-0.02823	-1.50708	1.76288	1.61635	602	0.0252	0.01874	0.01642	0.0148
601.9	0.18339	-1.41788	1.34774	1.51305	601.9	0.02523	0.01876	0.01642	0.01485
601.8	0.02655	-0.97308	1.16624	1.08319	601.8	0.02527	0.01884	0.01647	0.01492
601.7	0.05462	-1.28748	1.51433	1.15103	601.7	0.02528	0.0189	0.01647	0.01497
601.6	-0.23185	-1.76102	1.75922	1.70032	601.6	0.02532	0.01893	0.01653	0.01497
601.5	0.25956	-1.33013	1.28282	1.31619	601.5	0.02537	0.01896	0.01658	0.01501
601.4	0.78404	-1.66055	1.74603	1.35001	601.4	0.02542	0.019	0.0166	0.01507
601.3	1.63408	-1.02701	1.69447	1.50284	601.3	0.02551	0.01897	0.01665	0.01514
601.2	2.19508	-1.61225	1.38774	1.12895	601.2	0.02558	0.01897	0.01668	0.01517
601.1	2.51846	-1.17885	1.15952	1.03389	601.1	0.02565	0.01901	0.01676	0.0152
601	2.95576	-1.31325	1.44488	0.54975	601	0.02568	0.01903	0.0168	0.01522
600.9	2.77975	-0.03947	1.10399	1.03008	600.9	0.02577	0.01907	0.01685	0.01523
600.8	2.50569	0.71345	0.85435	1.31011	600.8	0.02584	0.01911	0.01689	0.01527
600.7	3.31371	0.83539	0.55573	0.98798	600.7	0.02585	0.01918	0.0169	0.01533
600.6	3.30965	0.81208	0.80967	1.42653	600.6	0.02589	0.0192	0.01692	0.01536
600.5	3.07146	0.67566	0.82746	1.20005	600.5	0.02591	0.01927	0.01698	0.01542
600.4	2.29906	1.12262	0.51552	1.15303	600.4	0.02592	0.01927	0.01702	0.01544
600.3	2.74725	1.6407	0.63986	1.18582	600.3	0.02599	0.01929	0.01703	0.01553
600.2	2.70654	1.38324	0.7013	1.2142	600.2	0.02603	0.01934	0.01708	0.01556
600.1	2.44786	1.70342	0.20924	1.01703	600.1	0.02606	0.01936	0.01709	0.01558
600	3.3653	1.55019	0.68916	0.59577	600	0.02611	0.0194	0.01714	0.0156
599.9	2.76926	2.42054	0.68275	0.28241	599.9	0.02613	0.01942	0.01712	0.01564
599.8	3.14211	2.55348	0.95966	0.2667	599.8	0.02619	0.01946	0.01714	0.01566
599.7	3.87695	2.74319	1.24644	-0.11919	599.7	0.0262	0.01945	0.01717	0.01566
599.6	4.17513	3.24133	1.18574	0.39933	599.6	0.02623	0.01952	0.01724	0.01567
599.5	4.49109	4.07161	1.4515	0.08655	599.5	0.02623	0.01956	0.01728	0.0157
599.4	4.53611	2.71719	1.06617	0.57519	599.4	0.0263	0.01959	0.01735	0.01575
599.3	4.16159	2.48874	0.84499	0.14619	599.3	0.02635	0.01963	0.01741	0.01579
599.2	4.46045	2.05793	0.60027	-0.40731	599.2	0.02646	0.01962	0.01743	0.01583
599.1	4.66618	2.28213	0.37893	-0.35281	599.1	0.02653	0.01964	0.01748	0.01588
599	4.31494	2.73243	0.80516	0.09748	599	0.02659	0.01964	0.01751	0.0159
598.9	4.55288	2.49808	0.69059	-0.36551	598.9	0.02664	0.01968	0.01754	0.01593
598.8	4.54746	2.585	0.43619	-0.4228	598.8	0.02672	0.01973	0.01757	0.01594
598.7	4.75832	2.59914	0.9999	0.04508	598.7	0.02678	0.01979	0.01764	0.01598
598.6	5.79525	2.30044	0.83534	-0.04443	598.6	0.02682	0.01983	0.01764	0.01598
598.5	5.99219	2.68805	1.17736	0.06931	598.5	0.02688	0.01982	0.01764	0.01596
598.4	5.86593	3.41702	0.57035	0.51571	598.4	0.02696	0.01984	0.01767	0.01601
598.3	5.74136	2.94536	0.30144	0.50898	598.3	0.02703	0.01987	0.01769	0.01605
598.2	5.69369	3.3407	0.30876	0.29167	598.2	0.02706	0.0199	0.01767	0.01602
598.1	4.73834	3.45127	0.3416	0.50814	598.1	0.02712	0.01991	0.01772	0.01603
598	5.01471	3.38945	0.55498	0.46534	598	0.02711	0.01993	0.01778	0.01605
597.9	4.84165	3.89644	0.59011	0.50284	597.9	0.02717	0.02002	0.01777	0.01609
597.8	4.49215	3.09642	0.44079	0.58337	597.8	0.02723	0.02005	0.01776	0.01614
597.7	3.81792	2.923	0.27914	0.39921	597.7	0.02724	0.0201	0.01778	0.01619
597.6	4.74643	2.44205	0.72425	0.40771	597.6	0.02732	0.02014	0.01777	0.01619
597.5	4.56913	2.25766	0.87691	0.28626	597.5	0.02737	0.02017	0.01779	0.01621
597.4	3.80703	2.21346	0.61612	-0.70169	597.4	0.02743	0.02018	0.01779	0.01622
597.3	3.11942	2.19295	0.83013	-0.28427	597.3	0.0275	0.02028	0.01776	0.01622
597.2	3.0858	1.50179	0.81959	-0.45663	597.2	0.02758	0.02032	0.0178	0.01622
597.1	2.9081	2.4715	1.19947	-1.16722	597.1	0.02766	0.02039	0.01788	0.01621
597	2.52473	2.23066	1.85614	-1.37216	597	0.02769	0.02041	0.01793	0.01616
596.9	2.49741	2.69526	1.92628	-1.55779	596.9	0.02772	0.02042	0.018	0.01616
596.8	1.99167	2.13115	2.29394	-1.40369	596.8	0.02773	0.02044	0.01805	0.01617
596.7	1.59919	2.39759	2.59542	-1.07432	596.7	0.02782	0.02049	0.01811	0.0162
596.6	1.6418	1.91563	2.33999	-1.31234	596.6	0.02782	0.02054	0.01818	0.01623
596.5	1.61019	1.93438	1.62761	-1.3626	596.5	0.02785	0.02059	0.01824	0.01625
596.4	1.09993	1.48236	1.5457	-1.16683	596.4	0.02792	0.02067	0.01828	0.01628
596.3	1.23053	1.49037	1.47348	-1.42725	596.3	0.028	0.02067	0.01832	0.01632
596.2	1.28917	0.79068	0.80047	-1.20901	596.2	0.02807	0.0207	0.01834	0.01637
596.1	1.18233	1.90891	0.84671	-1.41945	596.1	0.0281	0.02077	0.01837	0.01639
596	0.75346	1.89485	1.33537	-0.92933	596	0.02816	0.02084	0.01841	0.01636
595.9	0.35933	1.42286	2.18873	-0.92143	595.9	0.02818	0.02087	0.01844	0.01636
595.8	-0.22253	2.00667	2.19773	-1.41941	595.8	0.02824	0.02096	0.01848	0.01638
595.7	0.06325	1.73155	2.3803	-1.47566	595.7	0.02831	0.02104	0.01852	0.01639
595.6	-0.42686	1.85344	2.454	-1.27014	595.6	0.02836	0.02113	0.01856	0.01646
595.5	0.19443	1.83792	2.24631	-0.75754	595.5	0.0284	0.02114	0.01857	0.01649
595.4	-0.32665	1.96237	2.00321	-1.44582	595.4	0.02849	0.02123	0.0186	0.01648
595.3	-1.70319	2.49321	2.04866	-1.81703	595.3	0.02855	0.02122	0.01868	0.01652
595.2	-2.15931	2.20375	2.30975	-2.18604	595.2	0.02863	0.02127	0.01866	0.01655
595.1	-2.41663	1.99691	2.8848	-2.21662	595.1	0.02869	0.0213	0.01871	0.01657
595	-2.85815	1.62642	2.75283	-2.20267	595	0.02874	0.02136	0.01875	0.01661
594.9	-3.24104	1.19079	2.74936	-2.28986	594.9	0.02882	0.02139	0.0188	0.01664
594.8	-3.5307	1.05614	2.17634	-2.09668	594.8	0.02889	0.02144	0.01882	0.01665
594.7	-4.33602	0.30446	2.27745	-1.41557	594.7	0.02894	0.02146	0.01881	0.01666
594.6	-4.1566	-0.08322	2.6176	-1.76047	594.6	0.02896	0.0215	0.01886	0.01665
594.5	-3.85609	0.44646	2.86921	-1.4511	594.5	0.02903	0.02152	0.01892	0.01665
594.4	-4.1073	0.64202	3.16108	-1.50805	594.4	0.0291	0.02158	0.01893	0.01666
594.3	-4.72838	0.46521	2.74784	-1.69051	594.3	0.02913	0.0216	0.019	0.01672
594.2	-4.47312	-0.23102	2.74475	-1.95312	594.2	0.02916	0.02163	0.01907	0.01672
594.1	-4.01096	-0.89562	2.71564	-1.80798	594.1	0.02921	0.02168	0.01914	0.01677
594	-4.05998	-0.92138	2.76789	-1.40068	594	0.02926	0.02168	0.01918	0.01682
593.9	-3.39856	0.05188	2.93008	-1.83179	593.9	0.02931	0.02173	0.01922	0.0169
593.8	-2.61337	-0.4133	2.51036	-1.48432	593.8	0.02933	0.02175	0.0192	0.01696
593.7	-2.61412	-0.53142	1.8396	-1.54181	593.7	0.0294	0.0218	0.01925	0.01702
593.6	-2.22262	-1.10574	1.68661	-1.47007	593.6	0.02948	0.0219	0.01927	0.01709
593.5	-2.05362	-0.96375	1.1151	-1.41496	593.5	0.02954	0.02194	0.01925	0.01714
593.4	-2.3058	-1.36166	0.54995	-1.88445	593.4	0.02955	0.022	0.01922	0.01717
593.3	-2.31204	-0.95783	0.95304	-1.67215	593.3	0.02964	0.022	0.01927	0.0172
593.2	-2.43461	-1.49826	1.32835	-1.51055	593.2	0.02967	0.022	0.01932	0.01724
593.1	-2.4169	-1.05337	1.89487	-1.28663	593.1	0.02973	0.02198	0.01937	0.01731
593	-2.22603	-1.13571	1.57811	-1.21273	593	0.02976	0.02203	0.01938	0.01731
592.9	-2.49656	-0.96575	1.77438	-1.12916	592.9	0.02983	0.02206	0.01941	0.01734
592.8	-2.69782	-0.96037	1.47646	-1.38204	592.8	0.0299	0.02206	0.01942	0.01736
592.7	-1.98461	-0.25609	1.1676	-1.93488	592.7	0.02997	0.02208	0.01949	0.01743
592.6	-1.48497	-0.42123	0.28765	-1.61767	592.6	0.03003	0.02209	0.01953	0.01749
592.5	-1.43888	-0.36504	1.37406	-1.24325	592.5	0.03007	0.02214	0.01957	0.01756
592.4	-1.60832	-0.24635	1.46011	-1.00045	592.4	0.03005	0.02221	0.01961	0.01759
592.3	-2.13011	-0.55944	1.73995	-0.73845	592.3	0.0301	0.02224	0.01962	0.01762
592.2	-2.902	-0.30273	1.71548	-0.71988	592.2	0.03014	0.02223	0.01965	0.01765
592.1	-3.41997	0.02215	1.83245	-0.7353	592.1	0.03017	0.02226	0.01969	0.01769
592	-2.32165	-0.1007	1.3149	-0.44981	592	0.03019	0.02236	0.01974	0.01769
591.9	-1.59105	0.07879	1.2811	0.09596	591.9	0.03022	0.0224	0.0198	0.01776
591.8	-0.14819	0.2798	0.5643	0.718	591.8	0.03026	0.02247	0.01987	0.0178
591.7	-0.67393	0.38583	1.0842	0.72816	591.7	0.03031	0.02249	0.01989	0.01784
591.6	0.18443	0.27759	1.09824	1.00645	591.6	0.03037	0.02254	0.01995	0.0179
591.5	0.67454	0.37224	1.29775	0.57343	591.5	0.0304	0.02261	0.02001	0.01798
591.4	0.59482	0.93431	1.83514	0.08107	591.4	0.03043	0.02273	0.02008	0.018
591.3	0.44675	1.63208	1.42483	-0.18607	591.3	0.03049	0.02277	0.02012	0.01804
591.2	0.75589	1.79683	0.64689	0.38257	591.2	0.03052	0.02285	0.02016	0.01807
591.1	1.50956	1.9312	1.22473	0.68534	591.1	0.03055	0.02289	0.0202	0.01811
591	1.56308	2.18246	1.58234	0.93733	591	0.03062	0.02295	0.02023	0.01815
590.9	1.84399	2.23236	1.27973	1.32089	590.9	0.03072	0.02302	0.02022	0.01819
590.8	1.38456	3.61128	1.2149	1.58209	590.8	0.03081	0.02303	0.02024	0.01822
590.7	0.6063	3.95609	1.95421	1.66346	590.7	0.03083	0.02304	0.02027	0.01823
590.6	0.15058	3.09162	0.92502	1.71961	590.6	0.03085	0.02308	0.02032	0.01828
590.5	-1.1781	2.7999	1.15814	2.06594	590.5	0.03089	0.02315	0.0204	0.01826
590.4	-1.35496	1.96885	0.98967	2.03106	590.4	0.03091	0.02321	0.02043	0.01829
590.3	-1.78119	2.12743	1.1631	1.97998	590.3	0.03095	0.02325	0.02047	0.01832
590.2	-2.32073	1.79566	1.91254	2.04008	590.2	0.03101	0.02331	0.02055	0.01835
590.1	-2.05762	2.21036	2.24704	2.2732	590.1	0.03108	0.02331	0.02061	0.01838
590	-1.42575	1.99783	1.68039	2.33438	590	0.03116	0.02336	0.02061	0.01844
589.9	-1.8049	2.03523	1.42646	1.96327	589.9	0.03123	0.02344	0.02061	0.01842
589.8	-1.04201	1.74714	1.05253	2.10953	589.8	0.03131	0.0235	0.02065	0.01844
589.7	-0.51	1.45062	0.69484	2.39475	589.7	0.03138	0.02351	0.02067	0.01851
589.6	0.14234	1.14146	1.28918	2.77829	589.6	0.03147	0.02354	0.02074	0.01857
589.5	-0.52984	0.83826	0.71847	3.08086	589.5	0.03154	0.02361	0.02081	0.01863
589.4	-0.18148	0.74619	0.79256	3.25688	589.4	0.03161	0.02367	0.02082	0.01864
589.3	-0.06168	1.269	1.26024	2.58017	589.3	0.03166	0.02371	0.02084	0.01865
589.2	0.2942	1.32755	0.77496	2.86736	589.2	0.03173	0.02378	0.02086	0.01871
589.1	-0.06273	0.89191	0.46388	3.14839	589.1	0.03181	0.02377	0.02094	0.01875
589	1.07817	1.97873	0.10182	2.72361	589	0.03186	0.02383	0.02102	0.01875
588.9	1.37459	1.33058	0.06538	3.04288	588.9	0.03191	0.02388	0.02106	0.01879
588.8	1.51759	1.30876	-0.15525	2.7753	588.8	0.03197	0.02387	0.02112	0.01885
588.7	1.10888	0.88921	0.06452	2.77154	588.7	0.03203	0.02388	0.02113	0.01889
588.6	0.71007	1.78855	0.18471	1.993	588.6	0.03209	0.02391	0.02119	0.0189
588.5	-0.57839	1.67681	0.79807	1.99796	588.5	0.03216	0.02393	0.02123	0.01894
588.4	0.14521	2.28059	0.76818	1.72726	588.4	0.03225	0.02399	0.0213	0.01898
588.3	-0.11322	2.83337	0.95544	1.06643	588.3	0.03232	0.02403	0.0213	0.01899
588.2	0.26299	2.07217	1.26104	1.21639	588.2	0.03243	0.02402	0.02137	0.01901
588.1	-0.36933	1.71109	1.1218	2.16531	588.1	0.03252	0.024	0.02136	0.01904
588	-0.94905	1.24338	0.65197	2.34887	588	0.03257	0.02401	0.02139	0.01909
587.9	-1.23699	0.56476	0.71781	2.25664	587.9	0.03263	0.02403	0.02143	0.01914
587.8	-0.92703	1.2063	-0.30507	2.17686	587.8	0.0327	0.02407	0.02151	0.01915
587.7	-1.22966	1.16382	0.43506	1.72628	587.7	0.03274	0.02409	0.02159	0.01921
587.6	-0.37439	1.09821	0.655	1.54657	587.6	0.03276	0.02413	0.02164	0.01924
587.5	1.03491	0.75237	0.63292	1.21008	587.5	0.03283	0.02419	0.02171	0.01929
587.4	1.18674	0.37979	0.00844	0.63551	587.4	0.03287	0.02428	0.02176	0.01933
587.3	1.10505	0.26304	0.42915	1.1122	587.3	0.03296	0.02431	0.02177	0.01935
587.2	1.90103	0.49529	0.29692	0.30948	587.2	0.03305	0.02438	0.02183	0.01941
587.1	1.86163	1.26716	0.48359	1.02706	587.1	0.03312	0.02443	0.02188	0.01947
587	2.07846	1.41371	0.89201	1.04514	587	0.03322	0.02452	0.02191	0.01947
586.9	2.07189	1.8959	-0.0358	0.71333	586.9	0.03333	0.02455	0.02195	0.01953
586.8	2.76852	1.40562	0.08288	0.84713	586.8	0.03341	0.02463	0.02197	0.01958
586.7	2.82596	1.4629	0.07009	0.68003	586.7	0.03348	0.02472	0.02203	0.01962
586.6	3.17881	1.94929	-0.03709	1.26731	586.6	0.03358	0.02472	0.02209	0.01964
586.5	2.49247	1.99805	0.04492	0.53537	586.5	0.03365	0.02478	0.02212	0.0197
586.4	1.77049	2.49691	0.80109	0.37726	586.4	0.03371	0.02482	0.02221	0.01972
586.3	1.65358	2.15729	0.83447	0.08634	586.3	0.03372	0.02485	0.02225	0.01971
586.2	1.25331	2.51656	1.26988	-0.03363	586.2	0.03377	0.02487	0.02226	0.01979
586.1	1.92039	2.4784	1.72552	0.02167	586.1	0.0338	0.0249	0.02232	0.01984
586	1.28061	2.00811	1.34349	0.28069	586	0.03385	0.02494	0.02238	0.0199
585.9	1.73734	2.42738	1.46532	-0.12155	585.9	0.0339	0.02495	0.02241	0.01996
585.8	2.41315	3.49947	1.74822	-1.23721	585.8	0.03395	0.02502	0.02242	0.02
585.7	2.48325	3.36801	2.22321	-1.22316	585.7	0.03403	0.02506	0.02242	0.02009
585.6	2.5452	3.13577	2.21737	-1.59419	585.6	0.03408	0.02508	0.02245	0.02014
585.5	2.15001	3.11314	2.35285	-1.13148	585.5	0.03412	0.02521	0.02247	0.02016
585.4	2.87437	2.59217	2.51689	-0.98686	585.4	0.03419	0.02524	0.02251	0.02022
585.3	3.35058	1.90436	2.78409	-0.92809	585.3	0.03426	0.0253	0.02255	0.02026
585.2	3.16973	1.55309	2.16604	-1.54916	585.2	0.0343	0.02536	0.02258	0.02028
585.1	3.64217	1.01198	1.97164	-1.69366	585.1	0.03432	0.02541	0.02263	0.02034
585	2.3894	0.74942	1.54913	-1.05597	585	0.03434	0.02545	0.02268	0.02038
584.9	2.07302	1.92264	0.89612	-0.97311	584.9	0.03436	0.02551	0.02271	0.02044
584.8	2.67051	2.03878	0.40973	-1.72819	584.8	0.0344	0.02558	0.02277	0.02051
584.7	3.00966	2.14884	0.98684	-2.27131	584.7	0.03448	0.02566	0.02282	0.02057
584.6	3.32529	2.89864	0.92413	-2.02184	584.6	0.03454	0.02572	0.02283	0.02064
584.5	3.0643	2.36224	0.60003	-2.32118	584.5	0.03461	0.02578	0.02286	0.02068
584.4	3.16697	2.40853	1.13804	-2.14607	584.4	0.03466	0.02588	0.02288	0.02068
584.3	2.3462	2.29488	1.04858	-1.57101	584.3	0.03473	0.02596	0.02289	0.02072
584.2	1.5271	2.05339	0.40412	-1.48809	584.2	0.03482	0.026	0.02292	0.02076
584.1	1.29666	2.89431	0.56582	-1.20986	584.1	0.03492	0.026	0.02296	0.0208
584	1.3923	3.38449	0.84017	-0.61346	584	0.03498	0.02603	0.02302	0.0208
583.9	0.64031	3.2694	0.4661	-0.76831	583.9	0.03506	0.02602	0.02311	0.02083
583.8	1.03062	2.97939	0.63088	-0.57649	583.8	0.03513	0.02603	0.02317	0.02087
583.7	0.74892	2.95085	-0.47957	-0.98012	583.7	0.03519	0.02609	0.02321	0.02088
583.6	0.36366	2.73874	-0.05312	-1.09662	583.6	0.03523	0.02613	0.02325	0.02093
583.5	-0.17631	2.56184	-0.38528	-0.53851	583.5	0.03527	0.02618	0.02332	0.02096
583.4	-0.41851	2.75088	-0.38619	-0.78424	583.4	0.03532	0.02625	0.02338	0.02103
583.3	-0.3837	2.73256	-0.54621	-1.48828	583.3	0.03537	0.02633	0.02343	0.0211
583.2	-1.15663	1.97865	-0.9718	-0.98396	583.2	0.03539	0.02639	0.02343	0.02114
583.1	-1.05099	1.60788	-1.11339	-1.28681	583.1	0.03547	0.02646	0.02342	0.02118
583	-1.59594	2.06902	-1.41305	-0.93434	583	0.03555	0.02654	0.02346	0.02121
582.9	-0.94461	2.36519	-1.61709	-1.16947	582.9	0.03561	0.02666	0.02352	0.02124
582.8	-0.99564	2.74286	-1.76184	-1.36458	582.8	0.03569	0.0267	0.02354	0.02125
582.7	-1.31147	2.73477	-1.66651	-1.06004	582.7	0.0358	0.02679	0.02356	0.0213
582.6	-1.45691	2.21725	-1.61194	-1.608	582.6	0.0359	0.0268	0.02361	0.02132
582.5	-1.62679	1.69846	-1.78804	-1.42276	582.5	0.03601	0.0269	0.02369	0.02133
582.4	-1.68273	1.31382	-1.82463	-0.70341	582.4	0.03606	0.02688	0.02376	0.02134
582.3	-0.84885	0.90743	-1.6716	-0.81262	582.3	0.03613	0.02696	0.02385	0.02142
582.2	-1.11811	1.0322	-2.39393	-0.93258	582.2	0.03622	0.02699	0.02391	0.02142
582.1	-1.62913	1.00502	-2.78233	-0.96489	582.1	0.03631	0.02701	0.02396	0.02149
582	-1.98932	1.36224	-2.86736	-0.42418	582	0.0364	0.02703	0.02401	0.0215
581.9	-1.49817	1.08415	-2.71237	-0.0889	581.9	0.03649	0.02709	0.02401	0.02153
581.8	-0.98073	1.83028	-2.09651	0.22654	581.8	0.03658	0.02717	0.02402	0.02154
581.7	0.10328	1.39906	-2.03361	0.2611	581.7	0.03667	0.02722	0.02405	0.02155
581.6	-0.49555	0.09708	-1.42801	0.67234	581.6	0.03676	0.0273	0.02407	0.02154
581.5	-1.01852	-0.24162	-1.03746	1.2667	581.5	0.03681	0.02737	0.02414	0.02158
581.4	-0.13986	0.50102	-0.95344	1.19236	581.4	0.0369	0.02737	0.02417	0.02158
581.3	-0.88461	-0.03902	-1.01092	1.80889	581.3	0.03697	0.02743	0.02423	0.02158
581.2	-1.49326	-1.13908	-0.39146	2.44829	581.2	0.03704	0.02749	0.02432	0.02163
581.1	-2.38882	-1.76218	-0.87041	2.07568	581.1	0.03712	0.02752	0.0244	0.02169
581	-2.66697	-1.43414	-0.8551	1.91518	581	0.03718	0.02752	0.02446	0.0217
580.9	-2.81425	-1.14036	-1.33285	2.0901	580.9	0.03726	0.02758	0.02454	0.0217
580.8	-3.6832	-1.65063	-0.92895	2.19229	580.8	0.0373	0.0277	0.02457	0.02175
580.7	-3.71066	-1.87318	-0.35376	1.75395	580.7	0.03739	0.02785	0.0246	0.02182
580.6	-2.31235	-2.28392	0.562	1.66011	580.6	0.03744	0.02792	0.02463	0.02184
580.5	-1.7871	-2.44438	0.21114	1.56256	580.5	0.03752	0.02796	0.02467	0.0219
580.4	-0.92733	-2.6278	0.51358	1.53596	580.4	0.03759	0.02805	0.02473	0.02197
580.3	-0.83865	-3.19339	0.54038	1.89862	580.3	0.03764	0.0281	0.02477	0.02201
580.2	-0.73351	-2.14062	0.65308	1.5655	580.2	0.03772	0.02812	0.0248	0.02205
580.1	-0.5182	-2.33526	1.05618	0.98697	580.1	0.03781	0.02814	0.02485	0.02209
580	-0.53121	-2.26037	1.41588	0.99022	580	0.03787	0.02818	0.02487	0.02212
579.9	-0.11058	-2.32609	1.98655	1.35236	579.9	0.03796	0.02824	0.02494	0.02217
579.8	-0.08279	-1.58453	2.91372	1.49578	579.8	0.03802	0.02831	0.02503	0.02222
579.7	0.27058	-0.71982	2.58958	1.28116	579.7	0.03811	0.0283	0.0251	0.02229
579.6	0.07681	0.07961	2.68093	2.20366	579.6	0.03819	0.02838	0.02516	0.02232
579.5	0.37229	-0.1294	2.20813	2.5109	579.5	0.03826	0.02842	0.02525	0.02237
579.4	0.49805	-0.34362	2.76601	2.97864	579.4	0.03834	0.02848	0.02529	0.02242
579.3	0.83635	-0.54386	2.29349	3.65583	579.3	0.03842	0.02851	0.02536	0.02249
579.2	0.60874	-1.03128	2.28364	3.50822	579.2	0.03848	0.02861	0.02543	0.02253
579.1	1.06457	-1.64869	2.47271	2.80416	579.1	0.03852	0.02868	0.02549	0.02257
579	0.63415	-2.05941	2.46487	3.86578	579	0.0386	0.02875	0.02548	0.02258
578.9	0.84084	-2.02292	2.27686	4.2261	578.9	0.03865	0.02881	0.02549	0.02258
578.8	1.53279	-1.94483	2.10996	3.59712	578.8	0.03875	0.02885	0.02557	0.02266
578.7	1.7172	-2.40884	1.63421	3.93918	578.7	0.03881	0.02902	0.0256	0.02266
578.6	1.72362	-1.9297	1.32407	4.39441	578.6	0.03888	0.02905	0.02567	0.02275
578.5	0.46025	-2.06721	0.40969	4.86217	578.5	0.03899	0.02911	0.02575	0.02283
578.4	-0.08187	-2.27202	0.26094	4.52673	578.4	0.03908	0.02917	0.0258	0.0229
578.3	1.16721	-0.92271	0.27504	4.20179	578.3	0.03914	0.02923	0.02587	0.02296
578.2	1.2715	-0.15007	0.34352	3.7494	578.2	0.03924	0.0293	0.02593	0.02298
578.1	0.98725	-0.71106	0.25691	3.5962	578.1	0.03931	0.02939	0.02598	0.02304
578	1.35895	-1.36621	0.6896	2.68656	578	0.03938	0.02947	0.02602	0.02312
577.9	1.42967	-0.32368	0.07087	2.58534	577.9	0.03944	0.02952	0.02605	0.02316
577.8	1.2761	0.71312	-0.12743	3.06014	577.8	0.03953	0.02958	0.02604	0.0232
577.7	2.3233	0.7642	0.06263	3.29808	577.7	0.03963	0.02965	0.02608	0.02326
577.6	3.12473	0.29661	0.30466	3.07536	577.6	0.0397	0.02971	0.02607	0.02333
577.5	3.80886	0.37276	0.61814	2.82179	577.5	0.03979	0.02976	0.02612	0.02338
577.4	4.04077	-0.11096	0.98515	3.01546	577.4	0.03985	0.02978	0.02615	0.02338
577.3	2.68669	-0.3076	0.77564	3.12947	577.3	0.03992	0.02982	0.0262	0.02344
577.2	2.33787	0.08901	0.84459	2.98067	577.2	0.04003	0.02993	0.02628	0.02346
577.1	1.23635	0.34073	0.89844	2.50011	577.1	0.04011	0.02996	0.02635	0.02349
577	1.62337	0.49366	1.15042	3.06785	577	0.0402	0.03003	0.02637	0.02352
576.9	1.16913	0.37969	1.31901	2.57085	576.9	0.04028	0.03007	0.02644	0.02356
576.8	0.6929	0.05612	1.20936	3.0526	576.8	0.04031	0.03014	0.0265	0.02362
576.7	0.60271	0.14734	1.36822	3.87089	576.7	0.04039	0.03017	0.02654	0.02364
576.6	0.20142	0.22352	0.74192	3.18139	576.6	0.04048	0.03022	0.0266	0.02365
576.5	0.86617	-0.97632	0.19118	3.22939	576.5	0.04054	0.03027	0.02657	0.0237
576.4	0.9553	-1.53229	0.3278	2.12976	576.4	0.04059	0.03032	0.0266	0.02375
576.3	0.55671	-2.2216	0.66003	1.42398	576.3	0.04066	0.03033	0.02661	0.02383
576.2	0.15514	-1.95442	1.00363	1.11064	576.2	0.04068	0.0304	0.02665	0.02387
576.1	0.49635	-2.17787	0.93224	0.68977	576.1	0.04073	0.03048	0.02669	0.02387
576	0.10614	-1.17221	0.89555	0.63123	576	0.04078	0.03055	0.0267	0.02392
575.9	0.02056	0.50052	1.24301	0.94475	575.9	0.04086	0.0306	0.02674	0.02397
575.8	-0.71016	0.92527	0.12364	1.46662	575.8	0.04093	0.03064	0.02678	0.02405
575.7	-1.78748	0.32325	0.78935	0.97446	575.7	0.04099	0.03068	0.02686	0.02408
575.6	-1.58885	0.43117	1.5678	0.28422	575.6	0.04108	0.03075	0.02694	0.02415
575.5	-1.4904	0.21912	1.82647	-0.65436	575.5	0.04116	0.03079	0.027	0.02421
575.4	-1.03484	-0.0219	1.71399	-1.45958	575.4	0.04124	0.03083	0.02709	0.02426
575.3	-1.11623	0.09299	2.21819	-1.66346	575.3	0.04132	0.0309	0.02714	0.02428
575.2	-1.54246	-0.04657	2.50162	-1.30913	575.2	0.0414	0.03095	0.02719	0.02437
575.1	-1.05021	0.41755	2.48374	-0.58267	575.1	0.04145	0.03097	0.02724	0.0244
575	-2.00125	-1.62569	2.60473	-0.51651	575	0.04152	0.03102	0.0273	0.02447
574.9	-2.18237	-1.35033	2.60124	-0.64783	574.9	0.04158	0.03108	0.02732	0.02455
574.8	-1.84188	-1.13353	2.36092	-0.39452	574.8	0.04164	0.03112	0.02737	0.02461
574.7	-1.30466	-1.1189	1.83406	-0.78413	574.7	0.04172	0.03121	0.02747	0.02462
574.6	-0.97504	-1.29253	1.9636	-0.95194	574.6	0.04181	0.03128	0.02754	0.02466
574.5	-0.86043	-2.34799	2.38309	-0.86133	574.5	0.04187	0.03132	0.0276	0.02471
574.4	-2.2653	-2.49623	2.14192	-0.87995	574.4	0.04195	0.03135	0.02768	0.02474
574.3	-1.31103	-2.10551	2.42646	-0.86277	574.3	0.04202	0.03137	0.02775	0.02479
574.2	-1.68979	-2.39712	1.42792	-1.64788	574.2	0.04214	0.03145	0.02784	0.02485
574.1	-0.83977	-2.06589	0.86263	-0.87186	574.1	0.04221	0.0315	0.02787	0.02488
574	-1.11366	-1.53781	1.6105	-0.25603	574	0.0423	0.03155	0.02792	0.02489
573.9	-1.22944	-2.12494	2.16365	-0.00974	573.9	0.04242	0.03154	0.02794	0.02495
573.8	-0.8156	-2.0827	2.55417	0.69019	573.8	0.04251	0.03156	0.02803	0.02505
573.7	-0.53961	-2.17191	1.7721	0.98479	573.7	0.04259	0.03163	0.0281	0.02507
573.6	-0.17171	-2.4676	2.42421	1.04675	573.6	0.04267	0.0317	0.02818	0.02512
573.5	0.90595	-2.1578	1.70558	0.88342	573.5	0.04276	0.03177	0.02824	0.02518
573.4	0.67191	-3.07776	1.56434	0.96345	573.4	0.04285	0.03189	0.0283	0.02523
573.3	0.29323	-2.48663	1.79622	1.31527	573.3	0.04296	0.03193	0.0284	0.02526
573.2	-0.79109	-2.94533	1.91605	1.76144	573.2	0.04303	0.03205	0.02852	0.0253
573.1	-0.70092	-3.00643	2.36045	1.48006	573.1	0.04313	0.03218	0.02856	0.0253
573	0.01572	-3.41274	1.53494	1.63708	573	0.04326	0.03227	0.0286	0.02534
572.9	-0.30248	-3.7891	1.46755	1.05102	572.9	0.0434	0.0323	0.02865	0.02538
572.8	0.3156	-4.23248	1.28386	1.5273	572.8	0.0435	0.03236	0.02871	0.02543
572.7	-1.00513	-5.1307	0.73384	1.50847	572.7	0.04364	0.03241	0.02872	0.0255
572.6	-0.69411	-4.8843	0.61931	1.10335	572.6	0.04375	0.03248	0.0288	0.02558
572.5	0.36084	-4.51688	1.06409	0.76976	572.5	0.04386	0.03256	0.02888	0.02565
572.4	-0.28758	-4.38207	0.88397	1.37468	572.4	0.04397	0.03268	0.02893	0.02571
572.3	-0.96909	-3.97313	1.02057	2.19727	572.3	0.04401	0.03275	0.029	0.02577
572.2	-0.68671	-3.51062	1.35669	3.01671	572.2	0.04409	0.03277	0.02904	0.02583
572.1	0.437	-3.0856	1.87354	2.96883	572.1	0.04417	0.0328	0.02912	0.02589
572	-0.63717	-3.09232	2.18838	2.05251	572	0.04422	0.03286	0.02918	0.02589
571.9	-0.91532	-3.43609	2.35709	1.79561	571.9	0.0443	0.03286	0.02922	0.02591
571.8	-0.95591	-2.94427	2.33921	1.06496	571.8	0.0444	0.03296	0.02925	0.02591
571.7	-0.53054	-2.71147	1.93251	1.52342	571.7	0.0445	0.03305	0.02933	0.02596
571.6	-1.25028	-3.2919	2.7669	0.09848	571.6	0.04466	0.0331	0.0294	0.026
571.5	-1.32145	-3.75076	2.92488	0.96398	571.5	0.04484	0.03317	0.02946	0.02609
571.4	-1.85558	-4.17035	3.38635	1.23019	571.4	0.04493	0.03326	0.02951	0.02614
571.3	-1.73109	-3.54936	2.93346	0.8151	571.3	0.04504	0.03341	0.02961	0.02623
571.2	-1.18728	-3.14729	1.49503	0.58576	571.2	0.04514	0.03346	0.02969	0.02629
571.1	-0.80364	-3.05373	1.59467	0.9755	571.1	0.04522	0.03353	0.02977	0.02636
571	-0.80388	-2.21661	2.18246	1.77064	571	0.0453	0.03362	0.02983	0.02638
570.9	-0.73123	-1.90372	2.44941	1.11001	570.9	0.04541	0.03368	0.02991	0.02643
570.8	-1.16392	-1.81395	1.87451	1.11618	570.8	0.04549	0.03376	0.03	0.02647
570.7	-0.63794	-1.92126	0.91291	1.14823	570.7	0.04555	0.03383	0.03004	0.02656
570.6	-0.75726	-2.09116	0.47504	1.15765	570.6	0.04562	0.03396	0.0301	0.02658
570.5	-0.19532	-2.08836	0.14117	1.01754	570.5	0.04574	0.03405	0.03013	0.02665
570.4	-0.23418	-1.60805	0.08818	0.35302	570.4	0.04584	0.03414	0.03019	0.0267
570.3	-1.21224	-0.69054	0.2412	-0.01031	570.3	0.04595	0.0342	0.03026	0.02672
570.2	-1.34847	0.53901	0.20897	-0.11985	570.2	0.04601	0.03425	0.03032	0.02678
570.1	-0.71029	0.65686	-0.15119	0.13904	570.1	0.04609	0.03433	0.03036	0.02683
570	-1.40247	0.33372	-0.43319	0.71797	570	0.04618	0.03439	0.03043	0.02689
569.9	-1.65588	1.17009	-0.76263	1.34695	569.9	0.04623	0.03447	0.03054	0.02697
569.8	-0.56302	0.94071	0.35258	2.25283	569.8	0.04629	0.03452	0.03063	0.02704
569.7	-0.25807	1.88923	1.43426	2.93463	569.7	0.04633	0.03455	0.03071	0.02712
569.6	-0.92829	2.39149	0.77823	3.10478	569.6	0.04637	0.03463	0.03077	0.02717
569.5	-1.84725	2.7043	0.49945	3.15111	569.5	0.04642	0.03468	0.03087	0.02718
569.4	-0.16752	3.59085	1.16218	4.09145	569.4	0.04651	0.03478	0.03094	0.0272
569.3	-0.21819	2.56697	0.60671	3.41345	569.3	0.0466	0.03485	0.03097	0.02718
569.2	-0.33514	2.47255	0.63361	3.84173	569.2	0.04672	0.03491	0.031	0.02723
569.1	0.05803	2.90317	0.67071	3.72951	569.1	0.04684	0.03499	0.03106	0.02729
569	0.66483	2.82931	1.22536	3.40691	569	0.04696	0.03502	0.03108	0.02732
568.9	0.5679	1.9596	0.83288	3.18531	568.9	0.0471	0.03513	0.03114	0.02738
568.8	-0.05519	2.6818	0.42362	3.36741	568.8	0.0472	0.03518	0.03119	0.02745
568.7	0.81924	2.77638	-0.37975	3.57531	568.7	0.04731	0.03526	0.03129	0.02751
568.6	1.3574	3.00811	-1.25017	3.62982	568.6	0.04738	0.03534	0.03136	0.02754
568.5	1.03276	3.78869	-1.53094	3.43922	568.5	0.04741	0.0354	0.03144	0.02767
568.4	0.17856	3.5223	-0.76864	3.21803	568.4	0.04749	0.03543	0.03149	0.02772
568.3	0.81403	4.86013	-1.14788	3.63906	568.3	0.04752	0.03551	0.03155	0.02778
568.2	0.5593	4.85513	-1.19845	3.57924	568.2	0.04758	0.03554	0.03161	0.02779
568.1	1.14944	4.98744	-1.38709	2.81462	568.1	0.04767	0.03559	0.03166	0.02783
568	0.89961	5.70018	-1.48314	2.70053	568	0.04776	0.0356	0.0317	0.02788
567.9	0.88524	4.96247	-0.11117	3.4241	567.9	0.04784	0.03569	0.03177	0.02791
567.8	0.64337	5.15383	-0.26608	3.23656	567.8	0.04794	0.0358	0.03181	0.02799
567.7	0.73076	5.43403	-0.49715	2.61917	567.7	0.04803	0.03587	0.03188	0.02808
567.6	0.90987	5.61074	-0.84219	3.61717	567.6	0.04812	0.03593	0.03199	0.02813
567.5	0.9186	5.11683	-0.55738	3.14477	567.5	0.04821	0.03598	0.03204	0.02821
567.4	0.79438	4.99803	0.35508	2.22772	567.4	0.04832	0.03605	0.03208	0.02828
567.3	0.34401	5.0623	0.69361	2.1545	567.3	0.0484	0.03616	0.03217	0.02838
567.2	-0.2035	5.4363	0.04418	2.18238	567.2	0.04847	0.03623	0.03225	0.02843
567.1	-0.64668	5.35666	-0.06572	2.32289	567.1	0.04855	0.03629	0.0323	0.02849
567	-0.42542	5.24073	0.04585	2.44481	567	0.04863	0.03641	0.03238	0.02855
566.9	-0.38542	4.63804	0.17678	2.54734	566.9	0.0487	0.03644	0.03244	0.02858
566.8	0.22663	4.91883	0.41336	2.53965	566.8	0.0488	0.03649	0.03252	0.02865
566.7	0.42372	4.30309	1.0306	1.44877	566.7	0.04894	0.03655	0.03258	0.02871
566.6	1.33655	4.8828	0.73174	1.11843	566.6	0.04908	0.03655	0.03264	0.02872
566.5	1.65292	4.81108	0.54425	0.8098	566.5	0.04919	0.0366	0.03267	0.02878
566.4	1.47187	4.38924	-0.2317	0.05107	566.4	0.04934	0.03668	0.03272	0.02883
566.3	0.78099	4.20984	-0.73856	-0.09759	566.3	0.04947	0.0367	0.03281	0.02885
566.2	1.38432	3.08798	-0.37018	-0.46388	566.2	0.04956	0.03679	0.03289	0.0289
566.1	1.32922	3.55499	0.13183	-0.58008	566.1	0.04965	0.03688	0.03296	0.02896
566	1.6858	3.94144	-0.77248	-1.74129	566	0.04973	0.03694	0.03307	0.029
565.9	2.04706	3.54648	-0.19824	-1.01262	565.9	0.04982	0.03697	0.03315	0.02906
565.8	2.82415	3.83037	-0.66689	-1.22685	565.8	0.04991	0.03705	0.03323	0.02912
565.7	3.33103	4.93891	-0.63337	-0.88743	565.7	0.04997	0.0371	0.03329	0.02917
565.6	4.09834	4.85142	-0.89883	-0.37133	565.6	0.05007	0.03719	0.03338	0.02919
565.5	3.48234	5.29474	-1.59925	-1.08238	565.5	0.0502	0.03725	0.03344	0.02926
565.4	3.53096	4.37295	-1.71746	-1.29436	565.4	0.05032	0.03734	0.03348	0.0293
565.3	4.18302	4.12106	-1.19178	-1.32524	565.3	0.05045	0.03743	0.03357	0.02934
565.2	4.42998	4.32133	-0.45347	-1.09305	565.2	0.05062	0.0375	0.03364	0.02941
565.1	4.67654	4.18205	-0.9856	-1.0457	565.1	0.05077	0.03762	0.03372	0.02948
565	4.8836	3.8714	-1.17119	-1.09959	565	0.05093	0.03771	0.03381	0.02952
564.9	5.25966	3.53312	-1.94812	-0.86286	564.9	0.05106	0.03781	0.03389	0.02959
564.8	5.45996	3.46828	-1.96482	-0.05299	564.8	0.05113	0.03792	0.03394	0.02968
564.7	5.2531	3.21599	-2.04006	0.03868	564.7	0.05122	0.03801	0.03404	0.02975
564.6	5.65304	2.50904	-1.49399	-1.2144	564.6	0.05134	0.03804	0.03409	0.02984
564.5	5.6393	2.42064	-1.17081	-1.93929	564.5	0.05142	0.03803	0.03416	0.02987
564.4	5.0501	1.52602	-0.69719	-2.29452	564.4	0.05153	0.03806	0.0342	0.0299
564.3	5.69476	0.86409	-1.20677	-2.57861	564.3	0.05161	0.03812	0.03426	0.02996
564.2	6.66743	0.22093	-1.02649	-2.6504	564.2	0.05172	0.03824	0.0343	0.03001
564.1	7.96679	1.23041	-2.67294	-2.73654	564.1	0.05182	0.03835	0.03435	0.03008
564	9.31672	1.36312	-3.23832	-2.45201	564	0.0519	0.03842	0.03441	0.03011
563.9	9.63614	1.54802	-3.10546	-2.37266	563.9	0.05198	0.03847	0.03447	0.03014
563.8	9.65323	1.64398	-2.99417	-1.8663	563.8	0.05209	0.03856	0.03451	0.03022
563.7	10.2755	1.70115	-2.84715	-0.89449	563.7	0.0522	0.03862	0.03457	0.03029
563.6	10.5633	0.61501	-2.733	-1.23279	563.6	0.05231	0.0387	0.03463	0.03036
563.5	10.1759	0.27751	-3.35908	-0.70546	563.5	0.05243	0.0388	0.03467	0.03047
563.4	9.59319	-0.04748	-3.77535	-0.83473	563.4	0.05254	0.0389	0.03474	0.03055
563.3	9.01702	-0.01719	-4.32011	-0.26625	563.3	0.05265	0.03899	0.03481	0.03064
563.2	9.67471	-0.36109	-4.20578	-0.47911	563.2	0.05273	0.03907	0.03486	0.03071
563.1	9.19743	-0.70468	-3.98701	-0.62579	563.1	0.05283	0.03913	0.03495	0.03077
563	10.0942	-1.01259	-4.51469	-0.95397	563	0.05295	0.03921	0.03505	0.03086
562.9	8.46171	-0.37359	-4.30968	-1.11373	562.9	0.05308	0.03925	0.03514	0.03093
562.8	8.14771	-1.16441	-4.60162	-0.9875	562.8	0.05323	0.0393	0.03522	0.03098
562.7	8.11061	-1.948	-4.99126	-0.29593	562.7	0.05336	0.03937	0.0353	0.03107
562.6	6.9318	-1.44115	-4.9468	-0.70983	562.6	0.05345	0.03951	0.03537	0.03114
562.5	6.54172	-0.85409	-4.1411	-0.951	562.5	0.05356	0.03966	0.03544	0.03123
562.4	5.60119	-2.30111	-4.62734	-0.65906	562.4	0.05368	0.03975	0.03549	0.03127
562.3	4.75481	-1.68346	-5.21057	-0.69028	562.3	0.05377	0.03985	0.03551	0.03138
562.2	4.87939	-1.92045	-4.61948	-0.96439	562.2	0.0538	0.03995	0.03554	0.03144
562.1	5.49323	-2.38257	-5.08124	-0.45594	562.1	0.05381	0.04002	0.03561	0.03154
562	4.89992	-2.35053	-5.12703	-0.76402	562	0.0539	0.04014	0.03564	0.03162
561.9	5.06405	-2.6596	-5.03306	-0.30489	561.9	0.05398	0.04021	0.03567	0.03168
561.8	4.83452	-2.23181	-4.33554	0.01459	561.8	0.05409	0.04026	0.0357	0.0317
561.7	5.69018	-2.64844	-4.74897	0.15642	561.7	0.05419	0.04035	0.03573	0.03179
561.6	5.32531	-2.02381	-3.72321	0.50542	561.6	0.05427	0.04043	0.0358	0.03185
561.5	5.28716	-2.85463	-3.75814	-0.06693	561.5	0.05439	0.04048	0.03592	0.0319
561.4	3.89604	-2.28934	-3.45207	0.01494	561.4	0.05453	0.04056	0.036	0.03195
561.3	3.58127	-2.66906	-4.78683	0.4415	561.3	0.05466	0.04066	0.03611	0.032
561.2	3.85705	-1.47125	-4.6327	0.75833	561.2	0.05474	0.04073	0.0362	0.03203
561.1	3.37396	-0.89348	-4.16181	1.62289	561.1	0.05482	0.0408	0.0363	0.0321
561	2.40016	-0.949	-3.84194	2.66397	561	0.05491	0.04095	0.03634	0.03217
560.9	1.66499	-0.17368	-3.05335	2.73528	560.9	0.05498	0.041	0.03643	0.03224
560.8	-0.45845	-0.86932	-1.85327	2.51896	560.8	0.05507	0.04109	0.03651	0.03231
560.7	-0.91085	-1.02774	-2.16825	1.95226	560.7	0.0552	0.04118	0.03659	0.0324
560.6	-0.65222	-1.33926	-1.86044	1.86974	560.6	0.0553	0.04127	0.03665	0.03248
560.5	-0.29959	-1.1925	-1.71214	1.50846	560.5	0.05543	0.04132	0.03673	0.03253
560.4	-0.51356	-1.15146	-1.82739	0.92737	560.4	0.05556	0.04145	0.03682	0.0326
560.3	-1.16113	-0.27813	-1.77313	0.59806	560.3	0.05578	0.04157	0.03696	0.03265
560.2	-0.99095	0.01732	-1.72575	0.74015	560.2	0.05594	0.04163	0.03707	0.03268
560.1	0.64471	-0.46495	-1.0743	1.25026	560.1	0.05605	0.04167	0.03719	0.03271
560	1.76126	0.24279	-0.87733	1.08995	560	0.05615	0.04177	0.03728	0.03274
559.9	1.60231	1.09807	-0.8829	0.81416	559.9	0.05627	0.04184	0.03737	0.03281
559.8	1.71702	0.62092	-1.79891	0.68224	559.8	0.0564	0.04194	0.03742	0.03288
559.7	0.34633	-0.08287	-1.18599	0.17206	559.7	0.05651	0.04209	0.03746	0.03293
559.6	1.87104	1.14312	-0.6588	0.69771	559.6	0.05658	0.0422	0.03748	0.03303
559.5	2.35553	1.07003	0.03431	0.43362	559.5	0.05666	0.04231	0.03751	0.03311
559.4	1.6887	-0.00239	0.80667	-0.22354	559.4	0.05674	0.04239	0.03759	0.03313
559.3	1.945	-0.58385	0.93102	-0.14878	559.3	0.05688	0.04243	0.0377	0.03314
559.2	2.33055	-1.61311	0.34548	-0.21313	559.2	0.05696	0.0425	0.03777	0.03323
559.1	2.35898	-1.20741	1.18704	-0.39259	559.1	0.05707	0.04258	0.03786	0.0333
559	1.80967	-1.74041	2.24539	-0.8174	559	0.05729	0.0427	0.03802	0.03339
558.9	2.55262	-1.5558	1.26295	-0.76945	558.9	0.05743	0.04278	0.03815	0.03349
558.8	2.35871	-2.89886	1.79255	-0.82617	558.8	0.05757	0.04286	0.03827	0.03355
558.7	1.69549	-2.66984	0.46242	-1.47835	558.7	0.05769	0.04292	0.03836	0.03357
558.6	1.47154	-2.4174	0.22585	-0.91656	558.6	0.05778	0.043	0.03845	0.03363
558.5	1.33875	-3.54512	0.72937	-0.98275	558.5	0.05787	0.04306	0.03855	0.03366
558.4	1.19922	-3.41785	0.34849	-1.38275	558.4	0.05798	0.04313	0.03862	0.0337
558.3	0.69558	-3.1561	1.24943	-1.36828	558.3	0.05816	0.0432	0.03869	0.03374
558.2	0.9264	-2.01664	0.94583	-0.78906	558.2	0.05823	0.04329	0.03875	0.03381
558.1	0.53778	-1.48274	1.61366	-1.77374	558.1	0.05833	0.04337	0.03882	0.03386
558	0.92988	-1.82111	1.05101	-1.71382	558	0.05844	0.04348	0.03888	0.03395
557.9	1.08127	-1.98194	1.40499	-2.11655	557.9	0.05856	0.04358	0.03896	0.03404
557.8	1.67519	-2.22613	1.00657	-2.23581	557.8	0.05869	0.04371	0.03902	0.03409
557.7	1.5294	-2.75051	0.93522	-3.173	557.7	0.05886	0.04371	0.03911	0.03414
557.6	1.18983	-3.92576	0.3799	-3.04562	557.6	0.05903	0.04374	0.0392	0.03418
557.5	0.80854	-3.83842	0.26991	-3.33128	557.5	0.05917	0.04383	0.03928	0.03427
557.4	1.01572	-3.73317	0.48423	-3.10357	557.4	0.05929	0.04384	0.03936	0.03434
557.3	0.25575	-3.9813	1.38659	-3.81048	557.3	0.05943	0.04393	0.03945	0.0344
557.2	0.87043	-3.38464	0.77672	-3.81413	557.2	0.05959	0.04399	0.03952	0.03446
557.1	-1.3918	-3.63914	0.57676	-3.33821	557.1	0.0597	0.04409	0.0396	0.03453
557	-0.80518	-3.77543	0.68906	-3.82931	557	0.05977	0.04421	0.03964	0.0346
556.9	-0.76839	-4.10067	0.74276	-3.55426	556.9	0.05984	0.04434	0.03972	0.03467
556.8	-1.28921	-3.39424	1.14711	-3.57109	556.8	0.05992	0.04455	0.03977	0.0347
556.7	-2.30749	-3.52005	0.88339	-4.1336	556.7	0.06003	0.04466	0.03984	0.03477
556.6	-3.37026	-3.63498	0.94312	-3.80647	556.6	0.06013	0.04475	0.03994	0.0348
556.5	-3.59523	-2.86984	0.93152	-4.22902	556.5	0.06024	0.04485	0.04002	0.03485
556.4	-2.67594	-2.95812	-0.50729	-3.76424	556.4	0.06037	0.04491	0.04007	0.03494
556.3	-3.17422	-3.83976	-1.04447	-3.29324	556.3	0.0605	0.04497	0.04016	0.03502
556.2	-3.35952	-4.77979	-1.30037	-3.20272	556.2	0.06072	0.04508	0.04031	0.0351
556.1	-2.33294	-4.36617	-1.22446	-3.47477	556.1	0.06088	0.04519	0.04041	0.03523
556	-2.40505	-3.59678	-0.56693	-2.88517	556	0.06101	0.04526	0.04044	0.03535
555.9	-2.28128	-2.9166	-0.16788	-2.73422	555.9	0.06118	0.04535	0.04056	0.03545
555.8	-0.96688	-3.49595	0.07335	-2.87378	555.8	0.0613	0.04546	0.04062	0.0355
555.7	-0.88461	-3.16973	0.01147	-2.51694	555.7	0.06141	0.04553	0.0407	0.03556
555.6	-1.15913	-1.62708	0.59726	-2.79903	555.6	0.06157	0.04563	0.04073	0.03556
555.5	-0.60147	0.31264	0.24915	-3.02352	555.5	0.06169	0.04573	0.04077	0.03561
555.4	0.3134	1.93971	1.0346	-2.44089	555.4	0.06182	0.04583	0.04087	0.03569
555.3	0.52554	1.96906	1.17574	-2.86136	555.3	0.06195	0.04596	0.04094	0.03576
555.2	0.98583	3.31654	1.65697	-3.18462	555.2	0.0621	0.04605	0.04101	0.03586
555.1	1.21117	3.05579	2.41533	-2.56757	555.1	0.06224	0.04614	0.04113	0.03592
555	1.64814	2.38603	1.75744	-2.40537	555	0.06232	0.04625	0.04121	0.03605
554.9	2.14122	1.74092	1.22067	-2.20271	554.9	0.06245	0.04633	0.04129	0.03614
554.8	2.54664	1.41313	1.34481	-0.72837	554.8	0.06258	0.04644	0.04142	0.03623
554.7	3.18064	1.72924	2.26451	-0.41611	554.7	0.06273	0.04656	0.04152	0.03632
554.6	2.15226	0.49824	2.01275	-0.10396	554.6	0.06288	0.04667	0.0416	0.0364
554.5	0.86865	0.0396	2.14631	0.41544	554.5	0.06305	0.04677	0.04169	0.03649
554.4	1.83134	0.56237	2.46393	0.84451	554.4	0.06314	0.04694	0.0418	0.03656
554.3	2.76668	1.04662	2.56799	0.27199	554.3	0.06321	0.04709	0.04187	0.03665
554.2	2.96011	1.22247	2.37056	-0.14664	554.2	0.06331	0.04719	0.04196	0.03673
554.1	3.42765	1.86675	3.22248	0.02309	554.1	0.06344	0.04736	0.04204	0.03678
554	3.64578	1.66475	2.49309	0.64995	554	0.06357	0.04747	0.04213	0.03684
553.9	2.10315	1.63706	2.63489	0.93021	553.9	0.06366	0.04754	0.04219	0.03688
553.8	4.1038	2.15353	2.83696	-0.08229	553.8	0.06376	0.04759	0.04226	0.03695
553.7	4.8966	1.21914	3.47431	0.3039	553.7	0.06391	0.04764	0.04238	0.03704
553.6	4.04954	2.09386	3.69327	0.65042	553.6	0.06408	0.04769	0.04246	0.03714
553.5	3.04207	2.0497	3.37502	0.21183	553.5	0.06425	0.04773	0.04257	0.03729
553.4	3.62953	1.43755	3.71063	1.90502	553.4	0.06437	0.0478	0.04267	0.03739
553.3	4.9879	1.76859	3.94445	1.66448	553.3	0.06449	0.04788	0.04277	0.0375
553.2	5.64615	2.50087	4.4079	2.2449	553.2	0.0646	0.04794	0.04286	0.03761
553.1	6.58369	2.014	5.19634	2.87829	553.1	0.06473	0.04806	0.04296	0.03763
553	5.58731	2.69241	5.1286	2.27838	553	0.06488	0.04817	0.04307	0.03765
552.9	4.67063	3.05844	5.34896	2.73844	552.9	0.06496	0.04827	0.04315	0.0377
552.8	4.94545	4.40285	5.33753	3.6852	552.8	0.06506	0.04841	0.04322	0.03773
552.7	4.97125	4.1426	4.91409	3.16079	552.7	0.06521	0.04852	0.04333	0.03779
552.6	4.83071	3.8068	4.46381	2.88554	552.6	0.06534	0.04861	0.04342	0.03778
552.5	4.37344	5.08975	5.2247	3.73228	552.5	0.06551	0.04873	0.04356	0.03781
552.4	4.46505	4.52206	5.38608	3.38665	552.4	0.06564	0.04883	0.04367	0.03792
552.3	4.22226	4.2427	5.28922	3.90608	552.3	0.06576	0.04895	0.0438	0.03802
552.2	2.62603	3.39749	4.7344	4.29077	552.2	0.0659	0.04906	0.04389	0.03815
552.1	0.90035	1.7339	4.50978	5.40309	552.1	0.06604	0.04912	0.04398	0.03827
552	0.57016	1.30431	4.64005	4.95486	552	0.06622	0.04924	0.04409	0.03841
551.9	0.00736	0.65246	3.33771	4.80172	551.9	0.06636	0.04939	0.04419	0.0385
551.8	-1.0167	0.96791	3.12567	5.54422	551.8	0.0665	0.0495	0.04426	0.03866
551.7	-1.77464	1.10317	3.64524	5.42571	551.7	0.0667	0.04959	0.04435	0.03868
551.6	-2.64396	1.92759	3.19137	4.87682	551.6	0.06687	0.04972	0.04446	0.03874
551.5	-2.36326	1.60811	2.83943	4.83792	551.5	0.06701	0.04983	0.04458	0.03876
551.4	-3.15911	1.61196	1.77887	5.30482	551.4	0.06717	0.04991	0.04467	0.03877
551.3	-2.4563	2.14916	1.96681	5.29169	551.3	0.06731	0.05004	0.04477	0.03881
551.2	-0.56059	3.41713	2.78939	5.77685	551.2	0.0674	0.05016	0.04487	0.03887
551.1	-1.24347	3.52231	2.23109	5.60238	551.1	0.06755	0.05022	0.04495	0.03895
551	-1.75384	3.66077	1.77496	5.87936	551	0.06768	0.05028	0.04505	0.03899
550.9	-1.72798	3.19522	1.76089	6.51847	550.9	0.06787	0.05035	0.04514	0.03909
550.8	-2.56961	3.02125	1.28023	6.97364	550.8	0.06805	0.05048	0.04529	0.03921
550.7	-3.88746	2.31711	0.64015	7.08909	550.7	0.0682	0.05054	0.04533	0.03932
550.6	-3.7902	3.12612	1.19677	6.85577	550.6	0.06837	0.05071	0.04543	0.03946
550.5	-3.9438	2.11423	0.70287	6.76158	550.5	0.0685	0.05079	0.04552	0.03952
550.4	-3.79265	3.89332	1.09006	6.27683	550.4	0.06867	0.05088	0.04565	0.03957
550.3	-3.92371	3.24112	0.43788	4.90126	550.3	0.0688	0.05096	0.04572	0.03958
550.2	-3.95565	3.36115	-0.42432	4.8058	550.2	0.06894	0.05107	0.04578	0.03964
550.1	-3.76439	3.45012	-0.5681	4.65483	550.1	0.06913	0.05122	0.0459	0.03965
550	-2.3265	2.60533	-1.22245	5.03259	550	0.06931	0.05135	0.04601	0.03968
549.9	-3.64214	1.37139	-0.44935	6.01113	549.9	0.06943	0.05149	0.04613	0.0397
549.8	-2.44017	2.17464	-0.61789	5.37478	549.8	0.0696	0.0516	0.04624	0.03978
549.7	-2.99612	0.84419	-0.2968	4.7502	549.7	0.06979	0.05174	0.04636	0.03994
549.6	-2.63707	1.48874	-1.12132	4.42278	549.6	0.06994	0.05186	0.04646	0.0401
549.5	-2.71735	1.97864	-1.42741	4.33734	549.5	0.07006	0.05195	0.04652	0.04022
549.4	-2.88844	1.95177	-1.92452	4.17883	549.4	0.07019	0.05206	0.0466	0.04034
549.3	-3.39628	1.66009	-2.80386	3.54797	549.3	0.07035	0.05216	0.04668	0.04042
549.2	-4.13024	1.91695	-2.86757	3.1853	549.2	0.0705	0.05225	0.04672	0.04052
549.1	-5.04259	2.27757	-3.45616	3.36704	549.1	0.07067	0.05241	0.04685	0.04055
549	-3.93146	2.68433	-3.03095	2.81794	549	0.0708	0.05249	0.04694	0.04061
548.9	-2.62004	3.32597	-2.50382	2.80882	548.9	0.07092	0.0526	0.04705	0.04065
548.8	-0.92738	3.21577	-2.16179	2.42201	548.8	0.07102	0.05272	0.04714	0.04064
548.7	0.28503	2.97089	-2.52833	2.66821	548.7	0.07113	0.05286	0.0473	0.04071
548.6	1.13851	3.1892	-3.3421	2.80634	548.6	0.07127	0.05296	0.04741	0.04069
548.5	2.19562	3.06534	-4.25595	1.76141	548.5	0.07137	0.05304	0.04752	0.04076
548.4	2.08495	3.42943	-4.53532	2.51186	548.4	0.0715	0.05316	0.04761	0.04092
548.3	1.79668	1.4654	-3.90006	1.31666	548.3	0.07164	0.0533	0.04764	0.04106
548.2	2.15472	2.07664	-3.8762	0.87356	548.2	0.07178	0.05338	0.0477	0.0412
548.1	3.28783	1.93036	-3.24656	-0.102	548.1	0.07193	0.05349	0.04776	0.04131
548	1.97092	1.10506	-3.21394	-0.90619	548	0.07212	0.05356	0.04783	0.04143
547.9	2.35575	1.45277	-4.41636	-1.65384	547.9	0.07236	0.05373	0.04792	0.04154
547.8	1.81564	1.64242	-3.86023	-1.49297	547.8	0.07253	0.05389	0.04804	0.04167
547.7	1.45243	1.50575	-4.3596	-1.26977	547.7	0.07268	0.05403	0.04817	0.0417
547.6	2.84316	1.09599	-5.28148	-1.73611	547.6	0.07282	0.05415	0.04827	0.04173
547.5	4.04413	1.31579	-4.83598	-1.9449	547.5	0.07298	0.05425	0.04839	0.0418
547.4	5.1685	1.18117	-4.58906	-1.94974	547.4	0.07308	0.05439	0.04853	0.04188
547.3	5.05113	1.65579	-5.71676	-1.08843	547.3	0.07317	0.0545	0.04862	0.04194
547.2	5.2872	1.72342	-4.79145	0.20584	547.2	0.07322	0.05465	0.04868	0.04204
547.1	5.55158	1.14054	-4.53744	0.82507	547.1	0.07331	0.05476	0.04875	0.04213
547	6.11098	0.53199	-3.95471	1.57765	547	0.07344	0.05489	0.04885	0.0423
546.9	5.46604	0.33423	-3.83402	1.17991	546.9	0.07357	0.05499	0.04892	0.04243
546.8	3.38402	1.37345	-4.02423	0.66628	546.8	0.0737	0.05504	0.04897	0.0426
546.7	3.93391	2.7253	-4.25954	-0.26423	546.7	0.07386	0.05512	0.04902	0.04276
546.6	3.78387	2.2022	-3.26339	-0.49314	546.6	0.07403	0.05522	0.04908	0.04289
546.5	4.56947	2.32787	-3.24342	-0.02828	546.5	0.07419	0.05532	0.04914	0.04298
546.4	4.32637	2.76198	-2.76992	0.78127	546.4	0.07435	0.05545	0.04923	0.04305
546.3	5.51016	1.63752	-2.92195	1.6409	546.3	0.07448	0.05555	0.04939	0.04309
546.2	5.11866	1.30763	-2.01661	1.46352	546.2	0.07458	0.05559	0.04954	0.0431
546.1	5.1904	2.47697	-0.76075	1.6643	546.1	0.07472	0.05573	0.0497	0.04316
546	5.95881	2.11564	-0.93399	2.14475	546	0.07482	0.05581	0.04986	0.04326
545.9	6.39793	0.45019	-1.34906	1.67186	545.9	0.07498	0.05594	0.04999	0.04336
545.8	5.77675	-0.0469	-1.45073	1.59595	545.8	0.07511	0.05603	0.05012	0.04345
545.7	5.7505	-0.99507	-1.1596	1.18161	545.7	0.0753	0.05613	0.05022	0.04359
545.6	4.28405	-0.37733	-1.40235	0.02726	545.6	0.07546	0.05624	0.05029	0.04376
545.5	3.29661	-1.71914	-1.38978	0.2349	545.5	0.07563	0.05634	0.05037	0.04387
545.4	3.01392	-1.23849	-0.13351	-0.3004	545.4	0.07581	0.05644	0.05046	0.04396
545.3	2.51332	-1.64168	0.60971	-0.8885	545.3	0.07602	0.05658	0.05054	0.04408
545.2	1.78608	-2.13705	0.81614	-0.70245	545.2	0.07618	0.05665	0.05066	0.04413
545.1	1.88401	-0.89258	0.39529	-0.19478	545.1	0.07636	0.05672	0.05076	0.04418
545	2.41219	-0.60973	0.07183	0.83134	545	0.07652	0.05687	0.05088	0.04422
544.9	1.41026	-0.52694	-0.1949	1.37064	544.9	0.07668	0.05703	0.05101	0.04431
544.8	1.7718	0.18035	-0.84583	2.07244	544.8	0.07681	0.05711	0.05116	0.04437
544.7	2.02212	-0.59293	-0.86337	2.69378	544.7	0.07695	0.05725	0.05132	0.0445
544.6	1.97177	-0.41905	0.30578	2.49101	544.6	0.07713	0.05738	0.05137	0.04459
544.5	2.18513	-0.30741	1.60933	1.80305	544.5	0.07728	0.05746	0.05144	0.0447
544.4	0.87463	-0.42945	2.07877	1.37101	544.4	0.07743	0.0576	0.0515	0.04482
544.3	1.58146	-0.51831	2.58031	1.65637	544.3	0.07756	0.0577	0.05159	0.04492
544.2	1.83813	0.24291	2.58209	0.73403	544.2	0.07769	0.05783	0.05169	0.04499
544.1	1.60557	1.18321	3.03363	0.85783	544.1	0.07789	0.05794	0.05181	0.04509
544	2.38976	0.45417	4.27559	1.11168	544	0.07814	0.05807	0.05192	0.04518
543.9	2.11369	0.13019	3.21222	0.06851	543.9	0.07835	0.05818	0.05205	0.04528
543.8	3.69779	0.63722	2.63856	0.39299	543.8	0.07855	0.05836	0.05222	0.04539
543.7	3.4829	0.98183	1.33781	-0.06491	543.7	0.07869	0.05856	0.05237	0.04547
543.6	2.98999	0.46881	2.07905	-0.19552	543.6	0.07881	0.05873	0.05249	0.04553
543.5	4.30898	0.16563	2.41918	-0.34446	543.5	0.07893	0.0589	0.05266	0.04559
543.4	2.85361	-0.58849	1.83172	-0.22642	543.4	0.07911	0.05907	0.05284	0.04566
543.3	1.90514	0.37379	0.95699	-0.1652	543.3	0.07927	0.05924	0.053	0.04579
543.2	0.13151	0.28003	1.67586	-0.90658	543.2	0.07939	0.05938	0.05311	0.04588
543.1	-0.48996	0.38122	1.53984	-1.14249	543.1	0.07956	0.05953	0.05325	0.046
543	0.0861	0.32131	2.08386	-1.51242	543	0.07974	0.05969	0.05332	0.04611
542.9	-0.20874	0.232	1.2036	-0.33685	542.9	0.07995	0.05989	0.0534	0.04623
542.8	-1.06436	-0.80693	0.90471	-0.81512	542.8	0.0801	0.06004	0.05347	0.04639
542.7	-0.62937	0.42885	1.17489	-0.9084	542.7	0.0803	0.06021	0.05354	0.04651
542.6	-1.42394	1.37738	0.74004	-1.08548	542.6	0.08047	0.06035	0.05357	0.04663
542.5	-1.5869	1.37829	0.55763	0.0271	542.5	0.08059	0.06045	0.05366	0.04669
542.4	-1.15367	2.96312	1.21731	0.62941	542.4	0.08074	0.06057	0.05379	0.04679
542.3	-0.55515	3.02057	0.98789	1.08991	542.3	0.08093	0.06062	0.05391	0.04686
542.2	0.91437	3.68835	2.025	0.9153	542.2	0.08111	0.06069	0.05406	0.04696
542.1	1.15268	3.72989	0.93242	1.05896	542.1	0.08129	0.06078	0.05422	0.04709
542	0.70661	4.58003	1.34963	0.8476	542	0.08143	0.06088	0.05436	0.04717
541.9	1.86869	4.34876	0.54136	-0.29481	541.9	0.08161	0.061	0.05446	0.04729
541.8	3.00734	5.09735	1.14198	-0.4898	541.8	0.08178	0.06119	0.05459	0.04743
541.7	4.44934	4.58196	0.91897	-0.68962	541.7	0.08186	0.06132	0.05472	0.04753
541.6	2.83736	4.56769	1.38977	-0.67301	541.6	0.082	0.06149	0.05482	0.04765
541.5	2.65458	3.0951	1.40308	-1.25577	541.5	0.08214	0.06164	0.05489	0.04776
541.4	2.74235	2.64013	1.16198	-1.83384	541.4	0.08233	0.06178	0.055	0.04784
541.3	3.54764	1.55875	1.27933	-2.82276	541.3	0.08249	0.06184	0.0551	0.04792
541.2	2.897	1.86284	0.78109	-1.65167	541.2	0.08267	0.06191	0.05526	0.04799
541.1	3.06022	2.44138	0.58215	-1.21709	541.1	0.08288	0.062	0.0554	0.04807
541	3.25845	2.35025	0.94899	-0.45634	541	0.08306	0.06213	0.05558	0.04816
540.9	0.88433	2.51262	1.24005	-2.28797	540.9	0.08326	0.06228	0.05576	0.04827
540.8	-0.49893	2.63061	1.84778	-1.32953	540.8	0.08344	0.06235	0.0559	0.04841
540.7	0.17536	2.65504	1.6972	-1.43276	540.7	0.08357	0.06245	0.05604	0.0485
540.6	-1.03454	2.51376	1.41301	-1.36054	540.6	0.08369	0.06255	0.05612	0.04859
540.5	-1.29592	3.11276	1.97493	-2.2287	540.5	0.08383	0.06269	0.05625	0.04869
540.4	-1.7948	2.91495	3.02496	-1.51344	540.4	0.08399	0.06279	0.05633	0.04874
540.3	-2.45229	1.81175	3.68816	-2.22109	540.3	0.0842	0.06289	0.05642	0.04887
540.2	-1.43137	0.39058	2.76367	-1.66007	540.2	0.08436	0.06298	0.05648	0.04898
540.1	-2.36727	0.6266	2.60424	-1.78612	540.1	0.08455	0.06313	0.05653	0.04909
540	-1.60253	0.80522	2.72177	-2.2913	540	0.08475	0.06322	0.05661	0.04915
539.9	-0.93269	-0.11737	1.94474	-1.71178	539.9	0.08498	0.06336	0.05666	0.04918
539.8	-0.24462	-0.07321	2.54431	-1.31278	539.8	0.08515	0.06343	0.05679	0.04927
539.7	-0.6498	0.42666	2.52475	-0.88945	539.7	0.0853	0.06349	0.05692	0.04934
539.6	-0.47217	1.60939	2.37831	-0.16933	539.6	0.08542	0.0636	0.05709	0.04943
539.5	0.06763	1.67315	2.84074	-0.88512	539.5	0.08557	0.06369	0.05725	0.04959
539.4	-0.0468	1.81243	2.29153	-1.13793	539.4	0.08578	0.06383	0.05743	0.04966
539.3	-0.97972	1.06942	1.67062	-0.76403	539.3	0.08591	0.0639	0.05761	0.04975
539.2	-0.93205	0.22306	2.41238	-1.29838	539.2	0.08609	0.06404	0.05776	0.04986
539.1	-1.32442	1.33586	3.05554	-1.94904	539.1	0.08627	0.06418	0.05786	0.04993
539	-1.16412	0.19969	2.8479	-1.9781	539	0.08646	0.06433	0.05791	0.04998
538.9	-1.38456	-0.219	3.22251	-1.94563	538.9	0.08664	0.06451	0.05799	0.05006
538.8	-2.37842	-0.66298	3.02436	-2.48605	538.8	0.08674	0.06478	0.05805	0.05015
538.7	-4.28124	-0.99687	3.83175	-2.40568	538.7	0.0868	0.065	0.05807	0.05026
538.6	-3.02893	-1.45481	3.11412	-1.38657	538.6	0.08693	0.06515	0.05815	0.05037
538.5	-3.58589	-1.40844	2.94101	-0.67212	538.5	0.08699	0.06533	0.05823	0.05045
538.4	-2.36252	-1.5295	3.1432	-0.80481	538.4	0.08722	0.06542	0.05836	0.05051
538.3	-3.16228	-1.6141	3.69311	-0.58992	538.3	0.08745	0.06547	0.05849	0.05063
538.2	-2.41575	-1.05103	3.72842	-1.00383	538.2	0.08769	0.06553	0.05863	0.05076
538.1	-2.53958	-1.45545	4.28558	-1.35667	538.1	0.08789	0.06557	0.05879	0.05087
538	-2.69846	-1.93115	4.18902	-1.1101	538	0.08806	0.06575	0.05898	0.05098
537.9	-3.40739	-1.56591	4.61721	-0.9534	537.9	0.08814	0.06593	0.05913	0.05108
537.8	-3.12643	-2.53033	3.24776	-1.3926	537.8	0.08822	0.06606	0.05931	0.05123
537.7	-3.12545	-2.77655	2.47435	-1.68721	537.7	0.08832	0.06619	0.05944	0.05137
537.6	-3.40616	-2.58343	1.74093	-1.37561	537.6	0.08843	0.06637	0.05955	0.05154
537.5	-1.72193	-3.4881	1.34907	-0.34757	537.5	0.08854	0.06654	0.05964	0.05163
537.4	-0.17199	-3.27974	0.56409	-1.01155	537.4	0.08876	0.06673	0.05974	0.05171
537.3	1.02323	-3.41616	0.56225	-0.75127	537.3	0.08895	0.06692	0.05986	0.05182
537.2	1.50419	-3.36204	-0.31404	-0.88182	537.2	0.08912	0.06702	0.05995	0.05191
537.1	1.89121	-3.34376	-1.04133	-0.25494	537.1	0.08929	0.06711	0.06005	0.05203
537	1.4557	-3.56424	-0.51303	-0.40084	537	0.08949	0.0672	0.06018	0.05211
536.9	0.66482	-2.93708	0.32943	0.13554	536.9	0.08971	0.0673	0.06033	0.0522
536.8	-0.44018	-1.12985	-0.01434	-0.33544	536.8	0.08991	0.06739	0.0605	0.05227
536.7	-0.91618	-1.66774	0.3394	-0.22083	536.7	0.0901	0.06749	0.06066	0.05239
536.6	-1.35327	-1.63581	-0.10023	-1.41901	536.6	0.09025	0.06767	0.06086	0.05253
536.5	-1.35238	-1.46087	0.14311	-1.95709	536.5	0.09042	0.06787	0.06105	0.05265
536.4	-1.15526	-1.92306	0.26704	-2.83255	536.4	0.09061	0.06805	0.06118	0.05282
536.3	-0.71358	-3.67747	-1.20463	-3.25867	536.3	0.09085	0.06823	0.06126	0.05301
536.2	-0.35352	-4.12229	-1.40701	-3.91729	536.2	0.09105	0.0684	0.06129	0.05313
536.1	-1.91328	-4.33267	-1.98685	-3.25138	536.1	0.09128	0.06853	0.0614	0.05327
536	-1.25834	-4.83952	-2.79515	-3.9367	536	0.0915	0.06864	0.06148	0.05342
535.9	0.534	-3.99841	-4.16492	-2.61836	535.9	0.0917	0.06875	0.06163	0.05354
535.8	0.60729	-4.70968	-4.65178	-1.6614	535.8	0.09191	0.06882	0.06177	0.05365
535.7	-0.92555	-5.11058	-4.53798	-2.4463	535.7	0.09205	0.06888	0.06187	0.05379
535.6	-0.90344	-5.783	-4.55991	-1.47043	535.6	0.09221	0.06898	0.06204	0.05387
535.5	1.33926	-4.84553	-3.17585	-0.30636	535.5	0.09243	0.06901	0.06224	0.05397
535.4	2.8317	-5.52828	-2.43806	0.19063	535.4	0.09272	0.06906	0.0624	0.05405
535.3	2.15033	-5.53923	-2.68517	-0.95457	535.3	0.09297	0.06917	0.06256	0.05416
535.2	2.8077	-5.31016	-2.62527	-1.88261	535.2	0.09329	0.06934	0.06272	0.05431
535.1	2.10074	-6.00932	-2.70484	-0.61591	535.1	0.09349	0.06951	0.06285	0.05445
535	1.49479	-6.85716	-3.96793	-1.55153	535	0.09369	0.06972	0.063	0.05458
534.9	2.63368	-7.1034	-3.00541	-1.46048	534.9	0.09382	0.06991	0.06312	0.05465
534.8	1.4724	-5.44274	-2.7352	-1.15639	534.8	0.09398	0.07014	0.06323	0.05475
534.7	2.36897	-4.92618	-2.95231	-0.32623	534.7	0.0941	0.07034	0.06337	0.05484
534.6	3.12134	-4.68544	-2.87878	0.06636	534.6	0.09433	0.07048	0.06348	0.05494
534.5	4.04053	-3.69575	-2.52692	1.62438	534.5	0.09459	0.07061	0.06362	0.05504
534.4	5.21046	-3.98347	-3.35973	1.88112	534.4	0.09491	0.07076	0.06375	0.05515
534.3	6.70769	-3.30858	-2.37541	1.45683	534.3	0.09512	0.07088	0.06389	0.0552
534.2	6.19025	-3.44601	-2.7479	1.94661	534.2	0.09538	0.07094	0.064	0.05527
534.1	5.46736	-4.23966	-2.56982	1.37798	534.1	0.09555	0.07108	0.06414	0.05538
534	4.39597	-3.54163	-2.47442	0.84472	534	0.09573	0.07124	0.06426	0.05547
533.9	4.31191	-3.48246	-1.08729	1.39999	533.9	0.09594	0.07147	0.06441	0.05558
533.8	4.8891	-3.59439	-1.03609	1.12278	533.8	0.09611	0.07171	0.0646	0.05569
533.7	5.35446	-4.27728	-0.69546	1.15564	533.7	0.09631	0.07189	0.06475	0.05587
533.6	5.04486	-3.05575	-1.89868	0.53755	533.6	0.09648	0.07207	0.06489	0.05602
533.5	5.82657	-4.35544	-0.37812	0.53476	533.5	0.09664	0.07225	0.06505	0.05619
533.4	6.40624	-4.5635	-0.94834	0.56002	533.4	0.09678	0.07239	0.06518	0.05637
533.3	7.52684	-3.60734	-0.37219	1.62103	533.3	0.09693	0.07248	0.06526	0.05649
533.2	8.19888	-3.51671	-1.28312	1.73522	533.2	0.09717	0.07255	0.06534	0.05664
533.1	6.94546	-2.78098	-0.62562	2.82334	533.1	0.09741	0.07269	0.06543	0.05671
533	6.94182	-2.21566	-0.40817	2.88128	533	0.09762	0.07279	0.06555	0.05678
532.9	6.54591	-2.7045	-0.48969	2.87731	532.9	0.09784	0.07288	0.06573	0.05687
532.8	8.07018	-2.13688	0.44211	1.6866	532.8	0.09805	0.07307	0.06587	0.05695
532.7	8.44571	-1.70723	2.39989	1.86226	532.7	0.09824	0.07324	0.06595	0.05702
532.6	7.57102	-1.02009	3.65026	-0.01487	532.6	0.09842	0.07345	0.066	0.05714
532.5	8.81434	-1.14048	3.06472	-0.20133	532.5	0.09861	0.07366	0.0661	0.05722
532.4	9.21098	-1.56253	3.73706	0.62359	532.4	0.09876	0.0739	0.06624	0.05738
532.3	9.60629	-1.68787	4.43944	-0.47654	532.3	0.09896	0.07417	0.06645	0.05756
532.2	8.43017	-0.12332	3.99889	-1.5501	532.2	0.0991	0.07435	0.06656	0.05769
532.1	7.65901	-0.53801	3.10853	-1.76835	532.1	0.09928	0.07451	0.06672	0.05785
532	8.24024	0.36941	3.5584	-1.10564	532	0.09946	0.07464	0.06682	0.05795
531.9	7.87929	1.70935	2.57779	-0.74522	531.9	0.09959	0.07468	0.06698	0.05807
531.8	5.51526	2.48369	3.14439	-0.79569	531.8	0.09976	0.07474	0.06709	0.05817
531.7	4.08598	3.57485	1.00477	0.67904	531.7	0.10001	0.07484	0.06724	0.05832
531.6	4.19961	2.87955	1.39118	-0.24915	531.6	0.10033	0.07494	0.06737	0.05845
531.5	3.57312	2.89178	2.13995	-0.44464	531.5	0.10063	0.07514	0.06749	0.05863
531.4	2.92298	1.88439	2.64462	-1.7579	531.4	0.10078	0.07531	0.06761	0.05872
531.3	3.22895	2.15649	1.68521	-2.57603	531.3	0.10098	0.07548	0.06773	0.05882
531.2	2.60655	0.81226	2.62151	-3.90552	531.2	0.10113	0.07569	0.06787	0.05894
531.1	1.42343	0.03617	2.54261	-4.83678	531.1	0.10127	0.07588	0.06806	0.05907
531	0.87522	0.48654	2.92813	-3.62554	531	0.10141	0.07598	0.06827	0.05919
530.9	0.29241	0.41606	2.89295	-4.22129	530.9	0.10153	0.07609	0.06844	0.05938
530.8	-0.59664	0.82696	3.36293	-4.10924	530.8	0.10171	0.07619	0.06863	0.05953
530.7	-1.24407	0.76944	1.58792	-3.26672	530.7	0.10191	0.07626	0.06882	0.05968
530.6	-2.21812	0.56124	-0.13423	-4.5701	530.6	0.10221	0.07638	0.06896	0.0599
530.5	-2.57202	0.53564	0.47961	-4.39088	530.5	0.10242	0.07645	0.0691	0.06005
530.4	-0.96464	0.24445	0.86398	-4.47473	530.4	0.10263	0.0766	0.06923	0.06015
530.3	-1.06721	0.68162	1.09585	-4.1773	530.3	0.10282	0.07673	0.06935	0.06027
530.2	-1.83768	-0.12245	0.44178	-4.04476	530.2	0.10301	0.07689	0.06949	0.06036
530.1	-0.97442	-1.54605	2.11007	-3.51224	530.1	0.10319	0.07711	0.06972	0.06045
530	-1.24326	-1.63384	2.96552	-3.44666	530	0.10338	0.07733	0.0699	0.06055
529.9	1.31138	-2.13971	3.20543	-2.72401	529.9	0.1035	0.07753	0.07007	0.06065
529.8	2.33125	-1.60825	4.01904	-2.94079	529.8	0.10369	0.07773	0.07034	0.06077
529.7	3.32984	-1.29082	3.73037	-2.59879	529.7	0.10384	0.07791	0.07047	0.06086
529.6	2.15419	-1.20392	3.37208	-1.34184	529.6	0.10404	0.07804	0.07068	0.06093
529.5	2.65962	-1.23857	2.23367	-2.00418	529.5	0.10421	0.07819	0.07083	0.06108
529.4	2.71986	-1.02331	1.96	-1.78619	529.4	0.1044	0.07831	0.07102	0.06121
529.3	1.919	-0.42164	1.52658	-1.02675	529.3	0.10459	0.07844	0.07122	0.06132
529.2	0.88121	-1.18317	-0.1513	-2.65455	529.2	0.10478	0.0786	0.07134	0.06144
529.1	-0.15829	-0.2248	-1.90495	-3.26843	529.1	0.10502	0.07878	0.0715	0.06159
529	0.51342	-0.88962	-2.3936	-2.49497	529	0.10523	0.07895	0.07166	0.06171
528.9	0.71338	-1.03423	-2.63951	-2.90426	528.9	0.10543	0.07917	0.07187	0.0618
528.8	-0.96015	-2.30697	-2.81404	-2.93779	528.8	0.10575	0.07941	0.07208	0.0619
528.7	0.52985	-3.12504	-1.8982	-3.00997	528.7	0.10598	0.07965	0.07224	0.06202
528.6	0.50822	-2.79047	-0.81114	-2.79614	528.6	0.10619	0.07987	0.07241	0.06213
528.5	2.30514	-3.0137	0.0192	-3.6034	528.5	0.1064	0.08011	0.07253	0.06225
528.4	2.13441	-3.13927	-1.85436	-3.76249	528.4	0.10654	0.08032	0.07272	0.06241
528.3	2.71058	-2.43091	-2.06978	-4.31225	528.3	0.10672	0.08048	0.07289	0.06253
528.2	3.58542	-3.00884	-2.25852	-3.42611	528.2	0.10695	0.08061	0.07303	0.06275
528.1	2.44624	-1.42924	-3.03108	-3.64953	528.1	0.10719	0.08083	0.07321	0.06292
528	2.44729	-1.54206	-2.54556	-3.84598	528	0.10742	0.08099	0.07332	0.06311
527.9	2.46972	0.25366	-3.325	-3.29202	527.9	0.10774	0.08112	0.07344	0.06321
527.8	0.81577	-0.30006	-3.92208	-3.50843	527.8	0.10809	0.08135	0.07357	0.06338
527.7	2.16524	-1.10844	-4.34237	-4.30627	527.7	0.10838	0.08158	0.07371	0.06348
527.6	3.54003	-0.16417	-3.24735	-4.7191	527.6	0.10869	0.08181	0.07389	0.0636
527.5	3.66653	-0.4224	-1.37757	-4.0862	527.5	0.10901	0.08198	0.07401	0.0637
527.4	6.45929	0.0352	-2.08215	-3.9974	527.4	0.10924	0.08224	0.07419	0.06378
527.3	6.39372	-1.31973	-1.03348	-3.99892	527.3	0.10946	0.08246	0.07438	0.06389
527.2	5.47191	-1.50255	-1.92897	-3.49041	527.2	0.10972	0.08266	0.07457	0.06398
527.1	4.87578	-1.21407	-1.71141	-2.54496	527.1	0.10995	0.08283	0.07478	0.06413
527	4.55483	-0.33441	-0.97623	-1.64693	527	0.11019	0.08293	0.07497	0.06427
526.9	4.27173	-0.40601	-1.10658	-1.48607	526.9	0.11051	0.08312	0.07506	0.06444
526.8	4.54914	1.5699	-1.99982	-2.46276	526.8	0.11074	0.08323	0.07517	0.06459
526.7	3.15619	1.09866	-1.64152	-3.24532	526.7	0.11094	0.08339	0.0753	0.06474
526.6	1.53009	1.10282	-1.89224	-3.02542	526.6	0.1112	0.08352	0.07542	0.06491
526.5	2.13079	1.1035	-2.49396	-3.18771	526.5	0.11144	0.08374	0.0756	0.0651
526.4	2.30185	0.41993	-2.64767	-3.22459	526.4	0.11163	0.08393	0.07574	0.06528
526.3	1.98257	-0.65945	-2.80959	-4.71233	526.3	0.11181	0.08413	0.07591	0.06541
526.2	2.05594	-0.64286	-2.42049	-3.49705	526.2	0.11205	0.08426	0.07609	0.06549
526.1	1.95374	-2.00442	-1.28771	-2.96671	526.1	0.11228	0.08446	0.07625	0.06561
526	4.10372	-2.66478	-1.26295	-3.59374	526	0.11258	0.08472	0.07643	0.06572
525.9	4.71469	-1.34589	-0.44767	-3.02177	525.9	0.11294	0.08487	0.07657	0.06581
525.8	2.91408	-2.13599	0.40524	-2.4273	525.8	0.11322	0.0851	0.07674	0.06593
525.7	2.89442	-1.68885	1.04817	-1.85305	525.7	0.1135	0.08527	0.07688	0.06608
525.6	4.04283	-2.04172	2.22127	-0.9653	525.6	0.11372	0.08536	0.07704	0.06628
525.5	3.40748	-2.64032	2.82405	-0.58206	525.5	0.1139	0.08546	0.07723	0.0664
525.4	1.53861	-3.36756	2.24873	-1.22145	525.4	0.11406	0.08561	0.07745	0.06656
525.3	1.4767	-3.76404	1.83784	-2.09043	525.3	0.1142	0.08577	0.07769	0.06669
525.2	3.34236	-3.95587	2.36232	-1.87449	525.2	0.11431	0.08593	0.0779	0.06679
525.1	5.45552	-4.05295	3.88835	-2.74636	525.1	0.11445	0.08605	0.07806	0.06693
525	4.08003	-3.31375	3.44583	-3.13754	525	0.1146	0.08623	0.07825	0.06703
524.9	5.20877	-3.28862	4.74655	-3.43246	524.9	0.11477	0.08642	0.07843	0.06711
524.8	4.84873	-4.58064	4.87467	-3.81595	524.8	0.11503	0.08659	0.07855	0.06719
524.7	4.38479	-4.61824	4.02705	-2.57688	524.7	0.1153	0.08674	0.07874	0.06727
524.6	4.76762	-4.49225	3.30239	-1.19847	524.6	0.11552	0.08694	0.07891	0.06737
524.5	4.63537	-4.84956	4.43883	-0.65269	524.5	0.1158	0.08718	0.07908	0.06752
524.4	4.64897	-3.39766	3.37048	-0.21416	524.4	0.11616	0.08743	0.07921	0.06769
524.3	5.00891	-5.37108	0.77224	-0.93083	524.3	0.11639	0.08761	0.07939	0.0679
524.2	4.08321	-3.78964	1.16577	-0.53764	524.2	0.11661	0.08774	0.07954	0.06811
524.1	1.90503	-4.50395	1.41545	-0.37188	524.1	0.11689	0.08785	0.07972	0.06828
524	1.87323	-3.9484	1.79192	-0.71312	524	0.11716	0.08799	0.07986	0.06848
523.9	2.51107	-2.68275	1.47563	-1.80766	523.9	0.11745	0.08817	0.07995	0.0686
523.8	3.88353	-2.40606	1.88299	-1.39169	523.8	0.1177	0.08835	0.08005	0.06872
523.7	3.39616	-2.5128	1.43597	-0.44368	523.7	0.11794	0.08855	0.08017	0.06883
523.6	2.97699	-1.96962	2.3873	-0.67467	523.6	0.11811	0.0887	0.08035	0.06891
523.5	2.16409	-2.376	1.21945	-0.93917	523.5	0.11833	0.08891	0.08052	0.06903
523.4	1.77634	-1.06309	0.74838	-0.41533	523.4	0.1186	0.08913	0.08068	0.06913
523.3	2.86306	-1.98596	0.21907	-0.98595	523.3	0.11895	0.0894	0.08092	0.06927
523.2	0.92458	-2.4742	1.71107	-0.72788	523.2	0.11926	0.08955	0.08114	0.06945
523.1	1.16509	-1.03019	1.44268	0.00624	523.1	0.11958	0.08975	0.0814	0.06965
523	0.64026	-1.15368	1.81739	1.77674	523	0.11985	0.08988	0.08161	0.06986
522.9	-1.11141	-0.00814	0.15752	1.02544	522.9	0.12006	0.09006	0.0818	0.07009
522.8	-0.46154	-0.24322	0.43195	0.48733	522.8	0.12027	0.09024	0.08196	0.07029
522.7	-3.44281	0.43085	0.95307	1.26268	522.7	0.1204	0.09037	0.08217	0.07052
522.6	-3.34268	1.93864	2.51689	0.53957	522.6	0.12049	0.09058	0.08233	0.07072
522.5	-2.94042	1.72234	1.95321	0.3482	522.5	0.12066	0.09075	0.08243	0.07091
522.4	-3.27506	2.34376	1.31755	-0.42213	522.4	0.12093	0.09095	0.08258	0.07104
522.3	-3.67319	2.3975	2.01131	-0.49226	522.3	0.12126	0.09126	0.08267	0.07115
522.2	-2.60504	2.98319	1.84926	0.05048	522.2	0.1216	0.09152	0.08281	0.07129
522.1	-2.76438	3.12438	0.59916	0.15812	522.1	0.12196	0.09178	0.08296	0.07141
522	-3.97052	2.84381	0.75829	0.04337	522	0.12233	0.09201	0.08308	0.07155
521.9	-6.0099	2.73909	0.95306	-1.85936	521.9	0.12261	0.09219	0.08323	0.07166
521.8	-6.87173	3.57022	0.69045	0.63818	521.8	0.12284	0.09241	0.08338	0.07178
521.7	-6.34848	4.03834	0.91125	0.582	521.7	0.12305	0.09257	0.08348	0.07193
521.6	-7.37456	4.56532	-1.10438	0.84203	521.6	0.12328	0.09268	0.08367	0.07212
521.5	-6.1337	4.78843	-0.72479	1.51521	521.5	0.12344	0.09282	0.08386	0.07228
521.4	-5.14417	4.65673	0.29702	1.23059	521.4	0.12363	0.09298	0.08399	0.0725
521.3	-5.88628	4.40761	1.32403	0.63559	521.3	0.12391	0.09316	0.08414	0.07268
521.2	-5.82016	5.36687	-0.0726	-0.69651	521.2	0.12414	0.09334	0.08426	0.07286
521.1	-5.99525	4.24639	0.36954	-1.00353	521.1	0.12438	0.09351	0.08442	0.07303
521	-7.94099	4.97204	1.8429	-0.21578	521	0.12458	0.09372	0.08456	0.07313
520.9	-8.06912	3.6953	2.3746	-0.42841	520.9	0.12487	0.09391	0.08468	0.0732
520.8	-7.00571	5.60656	3.36432	0.49241	520.8	0.12506	0.09408	0.08483	0.07323
520.7	-7.62768	5.2757	3.78748	1.61357	520.7	0.12522	0.09428	0.08496	0.07329
520.6	-8.80869	3.30533	3.86364	1.86802	520.6	0.12543	0.09446	0.08518	0.07338
520.5	-8.36524	2.99494	4.08349	0.92129	520.5	0.12563	0.09459	0.08541	0.07353
520.4	-8.14357	3.65204	4.09643	0.42707	520.4	0.1258	0.09473	0.08566	0.0737
520.3	-8.27277	3.00449	3.31167	0.03436	520.3	0.12601	0.09487	0.08594	0.07387
520.2	-8.11819	2.41198	3.88036	1.02182	520.2	0.12625	0.09505	0.08618	0.07409
520.1	-7.28439	1.65292	4.66674	1.00175	520.1	0.1265	0.09523	0.08639	0.07432
520	-6.5311	1.86964	4.81718	0.10273	520	0.12675	0.09538	0.08659	0.07452
519.9	-6.19605	3.11971	5.16341	1.0651	519.9	0.12693	0.09558	0.08667	0.07466
519.8	-5.71635	2.94344	4.99477	-0.72984	519.8	0.12721	0.09582	0.08679	0.0748
519.7	-5.6335	3.43663	4.28715	-0.86051	519.7	0.12744	0.09604	0.08686	0.07492
519.6	-4.53314	2.40439	5.73674	-0.24647	519.6	0.1277	0.09629	0.08697	0.075
519.5	-5.87843	3.13065	6.42182	-0.055	519.5	0.12797	0.09652	0.08709	0.07513
519.4	-4.21292	1.10311	7.46325	-1.21589	519.4	0.12826	0.09671	0.08722	0.07522
519.3	-5.17279	-0.15	6.65992	-1.22178	519.3	0.1286	0.09686	0.08738	0.07532
519.2	-4.93739	0.6069	7.43234	0.40432	519.2	0.12886	0.09693	0.08755	0.07539
519.1	-5.03736	-0.10546	5.80556	0.14624	519.1	0.12909	0.09701	0.08779	0.07556
519	-5.39655	-0.93308	5.28587	-0.43813	519	0.12926	0.09701	0.08808	0.07572
518.9	-3.4609	-1.43315	4.35802	-0.49096	518.9	0.12938	0.09709	0.08835	0.0759
518.8	-2.12606	0.4712	4.83346	0.41454	518.8	0.12958	0.09716	0.08855	0.07609
518.7	-0.86844	1.39079	4.19292	1.06493	518.7	0.12975	0.0973	0.08879	0.07628
518.6	0.80546	1.70526	5.20628	2.5155	518.6	0.13005	0.09746	0.089	0.07652
518.5	1.26125	-0.19811	5.13212	2.97551	518.5	0.13041	0.09769	0.0892	0.07679
518.4	1.0382	-0.58538	5.0623	2.1133	518.4	0.13077	0.09787	0.0894	0.07695
518.3	1.13705	0.30555	5.26891	1.65998	518.3	0.1311	0.09808	0.08959	0.07706
518.2	0.06481	-0.19081	5.51479	2.39091	518.2	0.13148	0.09836	0.0898	0.07711
518.1	-2.85401	-0.04502	5.75897	3.50754	518.1	0.13181	0.09857	0.08998	0.07724
518	-1.8505	0.61122	5.68642	2.7675	518	0.13202	0.09881	0.09015	0.07736
517.9	-0.84081	0.09347	7.35243	2.72301	517.9	0.13225	0.09902	0.09034	0.07747
517.8	-1.60785	-1.19296	6.67417	3.61445	517.8	0.13249	0.0992	0.09057	0.07765
517.7	-0.14895	-2.29239	7.56279	3.83297	517.7	0.13274	0.09937	0.09079	0.07782
517.6	1.0791	-0.62826	8.32689	4.2128	517.6	0.13296	0.09962	0.09103	0.07798
517.5	-0.67651	-0.89125	6.40957	5.0923	517.5	0.1332	0.09993	0.0913	0.07824
517.4	-0.48195	-0.33122	5.11299	4.52472	517.4	0.13345	0.10014	0.09157	0.07851
517.3	1.00879	-0.4161	4.40154	4.53424	517.3	0.13371	0.1004	0.09183	0.07873
517.2	0.88737	-0.55778	4.17705	6.06893	517.2	0.13395	0.10066	0.092	0.07892
517.1	1.71003	-1.63419	3.50802	5.62009	517.1	0.13422	0.10094	0.09219	0.07903
517	1.47784	-1.65219	3.90399	6.00417	517	0.13456	0.10116	0.09226	0.07914
516.9	2.74441	-0.65198	3.25326	5.55957	516.9	0.13489	0.10136	0.09234	0.07925
516.8	2.6153	-1.88178	2.40335	5.85502	516.8	0.13518	0.10156	0.09247	0.07935
516.7	2.89079	-1.58122	2.19155	5.0387	516.7	0.13542	0.10177	0.0926	0.07947
516.6	2.51969	-1.81154	1.56916	4.9496	516.6	0.13567	0.10193	0.09276	0.07961
516.5	3.26518	-2.57395	2.26052	5.93427	516.5	0.13588	0.10214	0.09297	0.0797
516.4	3.95972	-3.71701	3.3145	6.68047	516.4	0.13608	0.10234	0.0932	0.07984
516.3	5.55294	-4.81341	3.5211	6.37852	516.3	0.13632	0.10254	0.09344	0.08002
516.2	5.74089	-4.79751	4.22697	5.15273	516.2	0.1366	0.10273	0.09369	0.08023
516.1	6.1812	-3.53556	3.14683	6.29989	516.1	0.13689	0.10292	0.09399	0.08052
516	6.86807	-3.65566	1.64312	7.33638	516	0.13712	0.10312	0.09422	0.08081
515.9	8.4553	-1.43328	3.10451	6.994	515.9	0.13736	0.10342	0.09444	0.08113
515.8	8.89835	-1.36981	2.55994	8.25932	515.8	0.13761	0.10374	0.09463	0.08139
515.7	9.08674	-0.75687	2.64463	9.36242	515.7	0.1379	0.10399	0.09466	0.08156
515.6	8.224	-0.50829	3.31871	9.07853	515.6	0.13819	0.10429	0.09473	0.08168
515.5	7.66507	-2.74477	4.32435	8.5496	515.5	0.13849	0.1045	0.09486	0.08173
515.4	7.50852	-3.70292	5.69187	8.08436	515.4	0.13883	0.10471	0.09498	0.0818
515.3	6.13345	-4.09524	4.03154	8.77494	515.3	0.13916	0.10487	0.09508	0.08185
515.2	6.08096	-3.33478	4.37172	8.99373	515.2	0.13941	0.105	0.0953	0.08191
515.1	6.67377	-3.40018	4.8961	9.19691	515.1	0.13972	0.10521	0.09554	0.08205
515	7.34429	-3.86963	4.86031	9.10088	515	0.13998	0.10543	0.09575	0.08226
514.9	7.48059	-4.47851	5.85282	8.26074	514.9	0.14021	0.10563	0.09593	0.08254
514.8	8.5056	-4.80694	5.03332	7.92226	514.8	0.14042	0.10584	0.0961	0.0828
514.7	8.88137	-3.66017	6.62645	7.68031	514.7	0.14062	0.10611	0.09632	0.08308
514.6	8.22866	-4.95285	6.09937	8.54081	514.6	0.14083	0.1063	0.09653	0.08333
514.5	9.3179	-4.19602	6.99733	8.64246	514.5	0.14104	0.1065	0.09671	0.08356
514.4	8.3262	-3.49672	7.08029	7.16781	514.4	0.14124	0.10671	0.09685	0.08372
514.3	8.37352	-3.8582	6.04467	7.88079	514.3	0.14148	0.10687	0.09699	0.08389
514.2	8.26963	-3.40129	6.60476	5.76133	514.2	0.14174	0.10698	0.09708	0.08405
514.1	8.38014	-4.37767	6.97574	6.07151	514.1	0.14206	0.10715	0.0972	0.08419
514	10.4048	-4.69172	7.64821	6.26448	514	0.1424	0.10734	0.09732	0.08437
513.9	10.773	-3.84446	8.27496	5.4024	513.9	0.14273	0.10746	0.09745	0.08456
513.8	8.28985	-2.79395	8.50041	4.43941	513.8	0.14301	0.10758	0.09765	0.08475
513.7	6.52077	-2.88223	8.88733	3.66468	513.7	0.14328	0.10778	0.0979	0.08496
513.6	7.03456	-3.27525	8.84081	3.54403	513.6	0.14343	0.10792	0.09809	0.08515
513.5	6.9213	-3.05946	10.502	3.82798	513.5	0.14361	0.10816	0.09837	0.08531
513.4	4.99129	-2.35504	11.1146	3.64688	513.4	0.14385	0.10838	0.09859	0.08548
513.3	4.71812	-2.70103	9.99635	3.60124	513.3	0.14409	0.10866	0.09884	0.08565
513.2	3.532	-2.527	8.86759	3.75636	513.2	0.14436	0.10897	0.0991	0.08587
513.1	2.95287	-2.90781	8.55153	3.56354	513.1	0.14463	0.10922	0.09934	0.08611
513	1.35799	-2.3523	7.23824	4.06595	513	0.14494	0.10946	0.09961	0.08633
512.9	0.26899	-2.62339	6.47878	4.3444	512.9	0.14525	0.10972	0.09983	0.08648
512.8	0.81608	-2.48441	6.26298	4.69599	512.8	0.14556	0.10993	0.10006	0.08659
512.7	0.94669	-2.47438	6.29174	5.27923	512.7	0.14583	0.11009	0.10026	0.08664
512.6	0.30383	-2.62211	5.84048	4.9618	512.6	0.14616	0.11027	0.10045	0.0867
512.5	0.14526	-3.49314	5.83979	5.86128	512.5	0.1464	0.11041	0.10062	0.08674
512.4	-0.51657	-3.85881	7.63499	4.40513	512.4	0.14669	0.11063	0.10077	0.08687
512.3	-0.01471	-2.45931	9.32914	3.69214	512.3	0.14693	0.11084	0.101	0.08703
512.2	0.09874	-1.52864	9.04001	4.24742	512.2	0.14716	0.11108	0.10119	0.08724
512.1	0.41741	-0.26576	8.42138	4.9953	512.1	0.14731	0.11139	0.1014	0.08745
512	-0.62525	-0.51815	9.14331	4.38793	512	0.14751	0.1117	0.10168	0.08771
511.9	-3.78192	-1.45164	9.72521	3.63738	511.9	0.1477	0.11199	0.10188	0.08792
511.8	-3.81961	-0.73663	9.31461	2.09823	511.8	0.14793	0.11225	0.10206	0.08813
511.7	-6.7822	0.39069	9.06911	2.10646	511.7	0.14819	0.11246	0.10226	0.08832
511.6	-7.69491	0.67892	6.97448	4.15506	511.6	0.14844	0.11271	0.10245	0.08851
511.5	-7.83991	-0.03774	7.90476	3.65429	511.5	0.14878	0.11294	0.10264	0.08867
511.4	-8.50343	-0.1308	5.73929	2.78332	511.4	0.14914	0.11307	0.10289	0.08876
511.3	-10.1076	0.11661	4.31433	1.98054	511.3	0.14955	0.11331	0.10314	0.08886
511.2	-9.25991	0.7787	3.68567	1.03961	511.2	0.14991	0.1136	0.10337	0.089
511.1	-9.86079	0.42434	3.45247	0.91937	511.1	0.15023	0.11388	0.10365	0.08912
511	-9.49347	0.81538	2.44386	2.20384	511	0.15059	0.11417	0.10394	0.08924
510.9	-10.1297	-0.78549	2.07728	3.01821	510.9	0.15086	0.11445	0.1042	0.08941
510.8	-8.04572	-1.46735	2.62096	3.64746	510.8	0.15111	0.11476	0.10445	0.08958
510.7	-9.65819	-1.39866	0.63007	3.63013	510.7	0.15132	0.11495	0.10462	0.08971
510.6	-10.7972	-3.14244	0.23204	2.83448	510.6	0.1515	0.11519	0.10474	0.08986
510.5	-11.88	-3.29734	0.53693	3.55141	510.5	0.15173	0.11545	0.1049	0.09003
510.4	-9.85958	-3.66076	1.00101	4.2348	510.4	0.15202	0.11574	0.10503	0.09022
510.3	-9.42997	-2.50944	0.20458	4.37933	510.3	0.15234	0.11603	0.10519	0.09045
510.2	-9.76809	-2.89007	-1.33052	2.46421	510.2	0.15278	0.1163	0.10533	0.09069
510.1	-7.28347	-3.17518	-0.40059	3.27958	510.1	0.15311	0.11656	0.10559	0.09091
510	-7.10138	-2.88368	0.17719	3.94977	510	0.15344	0.11678	0.10582	0.09111
509.9	-7.07253	-2.3385	1.66421	2.91759	509.9	0.15378	0.11695	0.10607	0.09126
509.8	-7.94172	-1.33764	2.64613	1.8128	509.8	0.15412	0.11713	0.10631	0.09136
509.7	-7.20894	-0.03222	2.65039	1.61746	509.7	0.15438	0.11735	0.1065	0.09146
509.6	-6.46328	1.22373	3.42183	1.06362	509.6	0.1546	0.11755	0.10668	0.09157
509.5	-6.0285	2.23076	3.24316	1.37383	509.5	0.15479	0.11782	0.10682	0.09171
509.4	-5.86483	1.4512	4.68606	1.31068	509.4	0.15499	0.11811	0.10698	0.09194
509.3	-6.34827	1.53025	4.55609	-1.05492	509.3	0.15515	0.11836	0.10716	0.09214
509.2	-8.77333	1.13436	3.26255	-0.86089	509.2	0.15534	0.11867	0.10744	0.09238
509.1	-6.748	0.65115	1.23062	0.17776	509.1	0.15559	0.11892	0.10773	0.09261
509	-5.23057	0.98841	-0.04233	2.03344	509	0.15586	0.11914	0.10803	0.09285
508.9	-4.95589	0.69063	-0.27299	0.89349	508.9	0.15618	0.11936	0.10829	0.09308
508.8	-5.12073	2.69338	0.28005	-0.24047	508.8	0.15647	0.11956	0.10849	0.0933
508.7	-4.33421	1.1933	-0.60344	0.68982	508.7	0.15675	0.11976	0.10872	0.09349
508.6	-0.72205	2.18482	-2.42116	0.33775	508.6	0.15701	0.11996	0.10889	0.09367
508.5	0.11352	2.43822	-1.13223	1.28845	508.5	0.15729	0.12016	0.10911	0.09385
508.4	3.51547	2.17541	-0.73323	2.26945	508.4	0.15751	0.12042	0.10929	0.094
508.3	4.57204	2.81535	-0.37483	2.52747	508.3	0.15781	0.12071	0.10948	0.09414
508.2	3.51226	4.27113	-0.84259	2.58519	508.2	0.15809	0.12091	0.10973	0.09429
508.1	4.26373	2.60241	-0.84511	3.46373	508.1	0.15842	0.12117	0.10988	0.09454
508	6.3037	2.15791	-0.66557	4.23122	508	0.15878	0.12138	0.11005	0.09474
507.9	9.178	0.89389	-2.71882	5.56114	507.9	0.15913	0.12157	0.11017	0.09497
507.8	7.66138	-0.36099	-3.55525	4.75269	507.8	0.15945	0.12175	0.1103	0.09521
507.7	8.50865	-0.52883	-2.5564	5.66791	507.7	0.15973	0.12191	0.11041	0.09547
507.6	9.9372	-0.11175	-0.71024	6.53107	507.6	0.16002	0.12208	0.11055	0.09563
507.5	8.96894	-0.60481	-0.95049	6.09842	507.5	0.1603	0.12227	0.11076	0.09586
507.4	8.83904	0.01968	-0.56893	4.47025	507.4	0.16066	0.12254	0.11114	0.09617
507.3	6.8843	-0.18396	-0.97775	6.15511	507.3	0.16095	0.12288	0.11149	0.09644
507.2	7.40174	-0.24438	-2.50622	4.74325	507.2	0.16122	0.12321	0.11183	0.09663
507.1	6.73102	0.34229	-3.72712	3.10502	507.1	0.16152	0.12355	0.11214	0.09682
507	7.81201	-1.35819	-4.43756	2.53783	507	0.1618	0.12386	0.11245	0.09697
506.9	7.81415	-1.93285	-3.95037	4.91931	506.9	0.16202	0.12411	0.1127	0.09707
506.8	5.37721	-0.89862	-4.36781	4.36932	506.8	0.16232	0.12431	0.1129	0.09725
506.7	5.6269	-0.87234	-4.87151	5.85453	506.7	0.16262	0.12444	0.11305	0.09738
506.6	5.60807	-1.21467	-5.65552	5.18344	506.6	0.1629	0.12454	0.11324	0.09755
506.5	6.30072	-1.2733	-7.91343	6.36593	506.5	0.16315	0.12467	0.11338	0.09775
506.4	7.10285	-0.61669	-8.00135	7.05527	506.4	0.16349	0.12485	0.11355	0.09798
506.3	6.12197	-0.73581	-8.32707	6.86338	506.3	0.16388	0.12503	0.11375	0.09819
506.2	4.18936	-2.47263	-10.2302	6.75767	506.2	0.16433	0.1252	0.114	0.09847
506.1	3.08368	-1.89755	-10.8915	6.48331	506.1	0.16477	0.12543	0.11424	0.09865
506	4.7575	-2.98	-11.0275	8.37716	506	0.16526	0.12569	0.11446	0.09879
505.9	7.12327	-2.17072	-10.7743	6.30908	505.9	0.16577	0.12612	0.11474	0.09901
505.8	6.46412	-2.52622	-10.7363	7.31021	505.8	0.1661	0.12647	0.11505	0.09918
505.7	6.11731	-4.17054	-11.8198	6.25919	505.7	0.1664	0.1268	0.11532	0.09937
505.6	4.76755	-5.26536	-14.0638	6.13856	505.6	0.16675	0.12711	0.11561	0.09955
505.5	2.63251	-6.97107	-15.2752	7.27363	505.5	0.16717	0.12735	0.11584	0.09972
505.4	1.65579	-5.11245	-14.9642	7.04835	505.4	0.16752	0.12758	0.11607	0.09998
505.3	0.06808	-6.49766	-15.5921	7.92788	505.3	0.16783	0.12781	0.11631	0.10019
505.2	0.02998	-6.46006	-16.0242	7.89358	505.2	0.16813	0.12801	0.11655	0.10041
505.1	-1.87416	-8.43752	-15.2544	6.88731	505.1	0.16847	0.12823	0.11684	0.10066
505	-1.27734	-9.30167	-14.6004	6.2101	505	0.16886	0.12846	0.11711	0.10087
504.9	-1.26611	-9.01627	-13.4331	6.84074	504.9	0.1693	0.12871	0.11736	0.10103
504.8	0.1868	-8.62492	-12.6299	5.51631	504.8	0.16961	0.12902	0.1176	0.10117
504.7	-0.53	-7.30193	-10.792	4.43808	504.7	0.1699	0.12932	0.11783	0.10135
504.6	-1.63751	-5.89834	-10.5337	3.949	504.6	0.17019	0.12974	0.11813	0.10156
504.5	-2.10232	-4.87753	-10.683	4.49791	504.5	0.1704	0.13005	0.11847	0.10168
504.4	-1.4884	-6.01758	-11.7384	3.24616	504.4	0.17065	0.13035	0.11881	0.10185
504.3	-1.01021	-6.30536	-11.5324	3.15019	504.3	0.17089	0.13058	0.11915	0.10206
504.2	-1.87245	-6.3604	-10.9476	2.23795	504.2	0.17128	0.13087	0.11946	0.10224
504.1	-1.89879	-5.31499	-11.9241	1.1812	504.1	0.17166	0.13111	0.11974	0.10247
504	-0.12756	-3.90299	-12.3283	1.16676	504	0.17205	0.13122	0.12	0.10265
503.9	0.78537	-3.97409	-12.1526	3.3569	503.9	0.17241	0.13129	0.12022	0.10288
503.8	-0.5358	-3.43994	-11.8428	3.97079	503.8	0.1728	0.13142	0.12043	0.10308
503.7	-0.31846	-1.29102	-10.0983	4.29917	503.7	0.17322	0.13159	0.12055	0.10327
503.6	1.3643	-1.20781	-10.6834	3.56395	503.6	0.17366	0.13179	0.12064	0.10346
503.5	1.81087	-2.36444	-11.7449	3.75934	503.5	0.17408	0.13205	0.12078	0.10368
503.4	2.26557	-1.70442	-10.4215	1.61857	503.4	0.17444	0.13242	0.12092	0.10389
503.3	2.37806	-3.31733	-10.5996	2.28831	503.3	0.17478	0.13284	0.12116	0.10413
503.2	2.23251	-4.72982	-9.55022	0.83429	503.2	0.17512	0.13321	0.12138	0.10429
503.1	2.23012	-6.60687	-10.206	0.32269	503.1	0.17544	0.13355	0.1216	0.10447
503	3.11314	-4.25155	-10.0042	-0.08744	503	0.17565	0.1338	0.12186	0.10465
502.9	6.62236	-2.303	-9.09223	1.25518	502.9	0.17587	0.13414	0.12213	0.1048
502.8	6.90124	-3.96327	-9.85199	0.50895	502.8	0.17617	0.13437	0.12244	0.10496
502.7	6.62765	-4.52737	-8.27125	-0.03823	502.7	0.17651	0.13458	0.12274	0.10512
502.6	4.68371	-5.24609	-7.08332	0.32988	502.6	0.17688	0.13476	0.12302	0.10526
502.5	5.33279	-4.91813	-5.95382	-1.31548	502.5	0.17728	0.13494	0.12322	0.10542
502.4	5.06618	-3.67599	-5.33753	-1.27684	502.4	0.17764	0.13515	0.12333	0.10561
502.3	6.79547	-4.34288	-3.98082	-0.57642	502.3	0.17794	0.13536	0.12345	0.10577
502.2	8.11524	-6.38685	-5.12773	-0.60006	502.2	0.17821	0.13568	0.12366	0.10608
502.1	8.92894	-5.98598	-5.09148	-1.00353	502.1	0.1785	0.13594	0.1238	0.10626
502	9.73732	-4.78765	-4.02573	-2.72582	502	0.17882	0.13624	0.12397	0.10645
501.9	10.8724	-2.92936	-4.70446	-3.23004	501.9	0.17912	0.13652	0.12418	0.10661
501.8	11.7822	-1.82651	-4.10423	-2.92254	501.8	0.17943	0.13682	0.12434	0.10677
501.7	10.1005	-2.20515	-4.3894	-1.31127	501.7	0.17967	0.13716	0.12455	0.107
501.6	9.3549	-1.16951	-5.13141	-2.04547	501.6	0.17994	0.13743	0.12477	0.10724
501.5	10.9122	-1.40565	-5.72301	-1.78769	501.5	0.18026	0.13765	0.12505	0.1075
501.4	10.6327	-1.61423	-6.09506	-1.53231	501.4	0.18067	0.13783	0.12532	0.10767
501.3	9.56385	-1.53517	-5.99497	-1.8184	501.3	0.1811	0.13797	0.12558	0.10786
501.2	9.22816	-1.37769	-5.99041	-2.36258	501.2	0.18156	0.13817	0.12582	0.10813
501.1	8.48004	-2.39286	-3.61815	-2.57987	501.1	0.18202	0.13835	0.12605	0.10836
501	7.46577	-1.77333	-4.14866	-2.62264	501	0.18241	0.13862	0.12625	0.10858
500.9	7.31328	-0.87201	-3.90345	-2.9883	500.9	0.18277	0.13892	0.12646	0.1088
500.8	7.35458	-1.70156	-2.17026	-1.2374	500.8	0.18303	0.13923	0.12663	0.10897
500.7	5.80658	-2.21213	0.18599	-1.20656	500.7	0.18333	0.13957	0.12683	0.10921
500.6	7.61695	-0.68276	0.96792	-0.56194	500.6	0.18364	0.13992	0.12697	0.10936
500.5	8.94686	-0.78044	0.65017	-1.09604	500.5	0.18385	0.14019	0.1272	0.10955
500.4	8.0976	-2.42571	1.06913	-0.83203	500.4	0.18411	0.14046	0.12753	0.10978
500.3	7.21524	-1.60757	0.93765	-1.07589	500.3	0.18437	0.14075	0.12793	0.11002
[truncated: 1,503 more rows]
