# Supplementary material for: Achieving Robust Cholesteric Liquid Crystal Polymer Networks with High Luminescence Dissymmetry Factor
Source: Research Square preprint supplement (doi:10.21203/rs.3.rs-7436711/v1), 2025-09-17
Supplement: Supplementary file 4 [file 5d6bdd88b6cd5e6d5e9fb476.xlsx]

## Sheet: Sheet1
40.0235	-0.3731
41.0225	-0.36787
42.0211	-0.36408
43.0196	-0.36257
44.0187	-0.36176
45.0192	-0.36133
46.0202	-0.36092
47.0211	-0.36047
48.0215	-0.35997
49.0212	-0.35909
50.0211	-0.35896
51.0215	-0.35899
52.0222	-0.35851
53.0223	-0.35817
54.0226	-0.3569
55.0234	-0.35753
56.0241	-0.35727
57.0246	-0.35613
58.0242	-0.3561
59.0239	-0.35438
60.0247	-0.35473
61.0257	-0.35437
62.026	-0.35415
63.0256	-0.35378
64.0256	-0.35302
65.0261	-0.352
66.0265	-0.3526
67.0267	-0.35161
68.0267	-0.35163
69.0266	-0.35039
70.0276	-0.3504
71.0283	-0.35088
72.0282	-0.34956
73.0282	-0.34918
74.0281	-0.34877
75.0276	-0.34855
76.0273	-0.34804
77.0278	-0.34802
78.0277	-0.34781
79.0271	-0.34663
80.0281	-0.34595
81.0299	-0.34585
82.0295	-0.34563
83.0283	-0.34523
84.0288	-0.34534
85.0294	-0.34516
86.029	-0.34395
87.0286	-0.34334
88.0286	-0.34301
89.0289	-0.343
90.0295	-0.34278
91.0303	-0.34229
92.0298	-0.3419
93.029	-0.34082
94.0295	-0.34126
95.03	-0.34106
96.03	-0.34066
97.0298	-0.33979
98.0295	-0.33961
99.0293	-0.3394
100.03	-0.33921
101.03	-0.33959
102.03	-0.33844
103.029	-0.33897
104.029	-0.33779
105.03	-0.33802
106.03	-0.33801
107.03	-0.33652
108.03	-0.33732
109.028	-0.33639
110.028	-0.33428
111.031	-0.33615
112.031	-0.33583
113.03	-0.33439
114.03	-0.33394
115.029	-0.33371
116.03	-0.33337
117.03	-0.33302
118.03	-0.3334
119.03	-0.33221
120.03	-0.33228
121.029	-0.33162
122.029	-0.33149
123.029	-0.33082
124.03	-0.33003
125.03	-0.32961
126.029	-0.32887
127.03	-0.32853
128.03	-0.32828
129.029	-0.32776
130.029	-0.32759
131.03	-0.32766
132.03	-0.32746
133.03	-0.3268
134.03	-0.32623
135.029	-0.32534
136.03	-0.3255
137.029	-0.32447
138.029	-0.32419
139.031	-0.32437
140.031	-0.32368
141.03	-0.32188
142.029	-0.322
143.03	-0.32144
144.03	-0.32048
145.03	-0.31938
146.029	-0.31876
147.028	-0.31726
148.029	-0.31659
149.029	-0.317
150.03	-0.31445
151.03	-0.31498
152.03	-0.31306
153.029	-0.31204
154.029	-0.31113
155.03	-0.31073
156.03	-0.31031
157.03	-0.30927
158.03	-0.30795
159.03	-0.30766
160.03	-0.30687
161.03	-0.30549
162.029	-0.30458
163.029	-0.3036
164.03	-0.30291
165.031	-0.30238
166.031	-0.30096
167.031	-0.29936
168.03	-0.29797
169.03	-0.29676
170.03	-0.296
171.03	-0.29508
172.03	-0.2932
173.03	-0.29224
174.03	-0.2909
175.029	-0.28938
176.029	-0.28719
177.029	-0.28636
178.03	-0.28478
179.029	-0.28308
180.029	-0.28034
181.029	-0.27781
182.029	-0.2765
183.029	-0.27362
184.03	-0.27274
185.031	-0.2702
186.031	-0.2673
187.03	-0.26435
188.03	-0.26245
189.03	-0.2603
190.03	-0.25749
191.029	-0.25437
192.029	-0.25164
193.029	-0.2494
194.03	-0.24711
195.03	-0.24309
196.029	-0.24044
197.029	-0.23705
198.029	-0.23326
199.029	-0.22937
200.03	-0.22641
