# Supplementary material for: Achieving Robust Cholesteric Liquid Crystal Polymer Networks with High Luminescence Dissymmetry Factor
Source: Research Square preprint supplement (doi:10.21203/rs.3.rs-7436711/v1), 2025-09-17
Supplement: Supplementary file 5 [file 6264b1204644f70037c85b51.xlsx]

## Sheet: Sheet1
	FC1	FC6	PC6
350	0.00222	0.00221	0.000911585
350.2	0.00284	0.0018	0.00115
350.4	0.00342	0.00147	0.00135
350.6	0.00394	0.00121	0.00153
350.8	0.00441	0.00102	0.00168
351	0.00484	0.000876795	0.00181
351.2	0.00522	0.000793483	0.00191
351.4	0.00556	0.000757894	0.00199
351.6	0.00586	0.000766791	0.00205
351.8	0.00612	0.000815322	0.00209
352	0.00635	0.000897825	0.00212
352.2	0.00655	0.00101	0.00213
352.4	0.00672	0.00114	0.00213
352.6	0.00685	0.00129	0.00211
352.8	0.00697	0.00146	0.00209
353	0.00706	0.00164	0.00205
353.2	0.00713	0.00182	0.00201
353.4	0.00718	0.002	0.00196
353.6	0.00722	0.00217	0.00191
353.8	0.00724	0.00234	0.00186
354	0.00724	0.0025	0.0018
354.2	0.00724	0.00264	0.00175
354.4	0.00723	0.00277	0.00169
354.6	0.0072	0.00288	0.00164
354.8	0.00717	0.00297	0.00159
355	0.00714	0.00305	0.00155
355.2	0.0071	0.0031	0.00151
355.4	0.00705	0.00312	0.00147
355.6	0.00701	0.00313	0.00144
355.8	0.00695	0.00311	0.00142
356	0.0069	0.00308	0.0014
356.2	0.00685	0.00303	0.0014
356.4	0.00679	0.00296	0.0014
356.6	0.00673	0.00287	0.00141
356.8	0.00667	0.00278	0.00143
357	0.00661	0.00267	0.00145
357.2	0.00655	0.00255	0.00149
357.4	0.00648	0.00243	0.00153
357.6	0.00642	0.00231	0.00159
357.8	0.00635	0.00218	0.00165
358	0.00629	0.00206	0.00172
358.2	0.00622	0.00195	0.00179
358.4	0.00615	0.00184	0.00188
358.6	0.00608	0.00174	0.00197
358.8	0.00601	0.00166	0.00207
359	0.00594	0.00159	0.00217
359.2	0.00587	0.00153	0.00228
359.4	0.0058	0.00149	0.0024
359.6	0.00573	0.00147	0.00252
359.8	0.00566	0.00146	0.00265
360	0.00559	0.00148	0.00277
360.2	0.00553	0.00151	0.00291
360.4	0.00546	0.00157	0.00304
360.6	0.0054	0.00164	0.00317
360.8	0.00534	0.00173	0.00331
361	0.00529	0.00183	0.00345
361.2	0.00524	0.00195	0.00358
361.4	0.00519	0.00208	0.00371
361.6	0.00515	0.00222	0.00385
361.8	0.00511	0.00237	0.00397
362	0.00509	0.00253	0.0041
362.2	0.00506	0.0027	0.00422
362.4	0.00504	0.00286	0.00433
362.6	0.00503	0.00302	0.00444
362.8	0.00503	0.00319	0.00454
363	0.00503	0.00335	0.00463
363.2	0.00504	0.0035	0.00471
363.4	0.00505	0.00364	0.00479
363.6	0.00507	0.00377	0.00486
363.8	0.0051	0.00389	0.00491
364	0.00513	0.004	0.00496
364.2	0.00517	0.00409	0.00499
364.4	0.00521	0.00416	0.00502
364.6	0.00525	0.00422	0.00503
364.8	0.0053	0.00426	0.00503
365	0.00535	0.00429	0.00502
365.2	0.0054	0.00429	0.005
365.4	0.00545	0.00428	0.00496
365.6	0.00551	0.00425	0.00492
365.8	0.00556	0.00421	0.00486
366	0.00561	0.00415	0.0048
366.2	0.00566	0.00408	0.00472
366.4	0.0057	0.004	0.00463
366.6	0.00574	0.00391	0.00454
366.8	0.00578	0.00381	0.00443
367	0.00582	0.0037	0.00431
367.2	0.00584	0.00359	0.00419
367.4	0.00587	0.00347	0.00406
367.6	0.00589	0.00336	0.00392
367.8	0.0059	0.00325	0.00378
368	0.00591	0.00314	0.00363
368.2	0.00591	0.00303	0.00347
368.4	0.0059	0.00293	0.00331
368.6	0.00589	0.00284	0.00315
368.8	0.00587	0.00276	0.00299
369	0.00585	0.00269	0.00282
369.2	0.00583	0.00263	0.00265
369.4	0.0058	0.00259	0.00248
369.6	0.00577	0.00256	0.00231
369.8	0.00573	0.00254	0.00214
370	0.00569	0.00253	0.00198
370.2	0.00565	0.00254	0.00181
370.4	0.00561	0.00257	0.00165
370.6	0.00557	0.00261	0.00149
370.8	0.00553	0.00266	0.00134
371	0.0055	0.00272	0.00119
371.2	0.00546	0.00279	0.00104
371.4	0.00543	0.00287	0.000906346
371.6	0.0054	0.00297	0.000776244
371.8	0.00538	0.00307	0.000654001
372	0.00536	0.00317	0.00054049
372.2	0.00534	0.00328	0.00043571
372.4	0.00534	0.0034	0.000341408
372.6	0.00534	0.00352	0.000257584
372.8	0.00535	0.00363	0.000184238
373	0.00537	0.00375	0.000122243
373.2	0.00539	0.00387	7.33459e-05
373.4	0.00543	0.00398	3.57998e-05
373.6	0.00547	0.00409	1.13512e-05
373.8	0.00553	0.0042	0
374	0.0056	0.0043	1.74633e-06
374.2	0.00568	0.0044	1.65901e-05
374.4	0.00576	0.00449	4.36583e-05
374.6	0.00587	0.00458	8.38239e-05
374.8	0.00598	0.00466	0.000137087
375	0.00611	0.00474	0.000200828
375.2	0.00625	0.00481	0.00027592
375.4	0.0064	0.00488	0.000361491
375.6	0.00657	0.00495	0.000456666
375.8	0.00675	0.00501	0.000559699
376	0.00695	0.00507	0.000670591
376.2	0.00716	0.00514	0.000786722
376.4	0.00739	0.00521	0.000907219
376.6	0.00764	0.00528	0.00103
376.8	0.0079	0.00536	0.00116
377	0.00818	0.00545	0.00128
377.2	0.00848	0.00554	0.0014
377.4	0.0088	0.00565	0.00152
377.6	0.00913	0.00577	0.00164
377.8	0.00948	0.0059	0.00175
378	0.00986	0.00606	0.00185
378.2	0.01025	0.00623	0.00195
378.4	0.01066	0.00643	0.00204
378.6	0.0111	0.00665	0.00211
378.8	0.01155	0.00689	0.00218
379	0.01203	0.00716	0.00223
379.2	0.01253	0.00746	0.00227
379.4	0.01305	0.00779	0.0023
379.6	0.0136	0.00816	0.00232
379.8	0.01416	0.00856	0.00233
380	0.01475	0.00899	0.00233
380.2	0.01537	0.00946	0.00231
380.4	0.01602	0.00997	0.00229
380.6	0.01669	0.01052	0.00226
380.8	0.01739	0.01111	0.00223
381	0.01812	0.01175	0.00219
381.2	0.01888	0.01242	0.00214
381.4	0.01968	0.01314	0.0021
381.6	0.02051	0.0139	0.00205
381.8	0.02137	0.01472	0.002
382	0.02228	0.01558	0.00196
382.2	0.02323	0.01649	0.00192
382.4	0.02423	0.01744	0.00189
382.6	0.02528	0.01844	0.00186
382.8	0.02638	0.0195	0.00184
383	0.02754	0.02061	0.00182
383.2	0.02877	0.02177	0.00182
383.4	0.03006	0.02299	0.00182
383.6	0.03143	0.02426	0.00183
383.8	0.03288	0.02559	0.00186
384	0.03442	0.02698	0.00189
384.2	0.03605	0.02843	0.00193
384.4	0.03777	0.02994	0.00198
384.6	0.03961	0.03153	0.00203
384.8	0.04156	0.03318	0.00209
385	0.04363	0.0349	0.00216
385.2	0.04585	0.0367	0.00223
385.4	0.04819	0.03857	0.0023
385.6	0.05068	0.04052	0.00237
385.8	0.05333	0.04256	0.00244
386	0.05615	0.04469	0.00251
386.2	0.05915	0.04691	0.00258
386.4	0.06233	0.04923	0.00265
386.6	0.06571	0.05165	0.00271
386.8	0.06929	0.05418	0.00276
387	0.07309	0.05681	0.0028
387.2	0.07713	0.05957	0.00284
387.4	0.08137	0.06246	0.00287
387.6	0.08592	0.06547	0.00289
387.8	0.09069	0.06862	0.0029
388	0.09575	0.0719	0.0029
388.2	0.10103	0.07534	0.0029
388.4	0.10667	0.07894	0.00288
388.6	0.11259	0.08269	0.00286
388.8	0.11881	0.08664	0.00283
389	0.12531	0.09069	0.0028
389.2	0.13225	0.09498	0.00277
389.4	0.13948	0.09951	0.00273
389.6	0.14707	0.1042	0.00269
389.8	0.15502	0.10905	0.00264
390	0.16333	0.11423	0.00261
390.2	0.17208	0.11948	0.00257
390.4	0.18118	0.12507	0.00253
390.6	0.19072	0.13089	0.00251
390.8	0.20063	0.13696	0.00248
391	0.21096	0.14326	0.00247
391.2	0.22173	0.1499	0.00246
391.4	0.23301	0.15669	0.00247
391.6	0.24464	0.16389	0.00248
391.8	0.25671	0.17125	0.0025
392	0.26929	0.17902	0.00253
392.2	0.2823	0.18702	0.00257
392.4	0.29574	0.19535	0.00263
392.6	0.30962	0.20401	0.00269
392.8	0.32393	0.21299	0.00276
393	0.33867	0.22229	0.00284
393.2	0.35392	0.23183	0.00292
393.4	0.36954	0.24178	0.00302
393.6	0.38558	0.25214	0.00312
393.8	0.40199	0.26273	0.00322
394	0.41876	0.27365	0.00333
394.2	0.43596	0.28498	0.00344
394.4	0.45345	0.29662	0.00355
394.6	0.4713	0.30859	0.00366
394.8	0.48937	0.32089	0.00376
395	0.50773	0.33351	0.00387
395.2	0.5263	0.34645	0.00397
395.4	0.54509	0.35971	0.00407
395.6	0.56403	0.37322	0.00416
395.8	0.58311	0.38713	0.00425
396	0.60219	0.40129	0.00433
396.2	0.62135	0.41569	0.00441
396.4	0.64043	0.43041	0.00447
396.6	0.65951	0.44529	0.00454
396.8	0.67844	0.4605	0.0046
397	0.69716	0.47586	0.00465
397.2	0.71567	0.49148	0.0047
397.4	0.73402	0.50717	0.00475
397.6	0.75209	0.5231	0.00479
397.8	0.76944	0.53912	0.00484
398	0.78679	0.55529	0.00489
398.2	0.80269	0.57147	0.00494
398.4	0.81931	0.58781	0.00499
398.6	0.83449	0.60407	0.00505
398.8	0.84967	0.62041	0.00512
399	0.8634	0.63674	0.0052
399.2	0.87713	0.65292	0.0053
399.4	0.88942	0.6691	0.0054
399.6	0.90098	0.6852	0.00553
399.8	0.91255	0.70105	0.00567
400	0.92194	0.71682	0.00583
400.2	0.93134	0.73235	0.00601
400.4	0.94001	0.74764	0.00621
400.6	0.94724	0.76268	0.00643
400.8	0.95302	0.7774	0.00668
401	0.9588	0.7918	0.00695
401.2	0.96314	0.80579	0.00725
401.4	0.96675	0.81963	0.00757
401.6	0.96892	0.83257	0.00792
401.8	0.97037	0.84551	0.00829
402	0.97109	0.85764	0.00868
402.2	0.97109	0.86977	0.0091
402.4	0.97037	0.8811	0.00954
402.6	0.9682	0.89161	0.01
402.8	0.96531	0.90132	0.01048
403	0.96169	0.91103	0.01098
403.2	0.95736	0.91992	0.0115
403.4	0.95302	0.92801	0.01203
403.6	0.94724	0.9361	0.01258
403.8	0.94073	0.94338	0.01314
404	0.93423	0.94904	0.01371
404.2	0.92772	0.9547	0.01428
404.4	0.91977	0.95956	0.01488
404.6	0.91182	0.96441	0.01547
404.8	0.90387	0.96765	0.01606
405	0.89592	0.97007	0.01667
405.2	0.88725	0.9725	0.01728
405.4	0.87858	0.97412	0.01789
405.6	0.8699	0.97493	0.01851
405.8	0.86123	0.97493	0.01913
406	0.85256	0.97493	0.01976
406.2	0.84461	0.97331	0.02039
406.4	0.83593	0.97169	0.02102
406.6	0.82798	0.96926	0.02167
406.8	0.82003	0.96684	0.02233
407	0.8128	0.9636	0.023
407.2	0.80558	0.95956	0.02368
407.4	0.79835	0.95551	0.02439
407.6	0.79184	0.95066	0.02511
407.8	0.78606	0.94581	0.02586
408	0.78028	0.94014	0.02664
408.2	0.77522	0.93448	0.02744
408.4	0.77016	0.92882	0.02829
408.6	0.76583	0.92316	0.02918
408.8	0.76221	0.91669	0.03011
409	0.75932	0.91022	0.03109
409.2	0.75643	0.90375	0.03212
409.4	0.75426	0.89728	0.03321
409.6	0.75209	0.89081	0.03437
409.8	0.75137	0.88514	0.03559
410	0.75065	0.87867	0.03688
410.2	0.74992	0.8722	0.03824
410.4	0.74992	0.86654	0.03968
410.6	0.75065	0.86088	0.0412
410.8	0.75209	0.85522	0.04281
411	0.75354	0.85036	0.04449
411.2	0.75571	0.84551	0.04628
411.4	0.75787	0.84066	0.04814
411.6	0.76077	0.83661	0.05011
411.8	0.76366	0.83257	0.05217
412	0.76727	0.82852	0.05433
412.2	0.77088	0.82529	0.05657
412.4	0.77522	0.82286	0.05892
412.6	0.77956	0.82043	0.06136
412.8	0.78389	0.81882	0.06391
413	0.78895	0.8172	0.06655
413.2	0.79401	0.81639	0.06929
413.4	0.7998	0.81558	0.07213
413.6	0.80485	0.81558	0.07506
413.8	0.81064	0.81558	0.07809
414	0.81642	0.81639	0.08121
414.2	0.82292	0.8172	0.08442
414.4	0.82871	0.81801	0.08773
414.6	0.83521	0.82043	0.09114
414.8	0.84172	0.82205	0.09461
415	0.84822	0.82448	0.09819
415.2	0.85472	0.82771	0.10186
415.4	0.86123	0.83095	0.10562
415.6	0.86846	0.83419	0.10955
415.8	0.87496	0.83742	0.11347
416	0.88147	0.84147	0.11749
416.2	0.88869	0.84551	0.1216
416.4	0.8952	0.85036	0.12579
416.6	0.9017	0.85522	0.13015
416.8	0.90821	0.86007	0.13452
417	0.91471	0.86492	0.13906
417.2	0.92122	0.86977	0.1436
417.4	0.92772	0.87544	0.14831
417.6	0.93423	0.88029	0.15312
417.8	0.94001	0.88595	0.15792
418	0.94579	0.89161	0.16298
418.2	0.95157	0.89728	0.16805
418.4	0.95663	0.90294	0.1732
418.6	0.96169	0.9086	0.17853
418.8	0.96675	0.91426	0.18394
419	0.97181	0.91992	0.18953
419.2	0.97615	0.92478	0.19512
419.4	0.97976	0.93044	0.20088
419.6	0.98338	0.9361	0.20682
419.8	0.98699	0.94095	0.21284
420	0.98988	0.94662	0.21895
420.2	0.99277	0.95147	0.22515
420.4	0.99494	0.95632	0.23153
420.6	0.99639	0.96037	0.23808
420.8	0.99783	0.96522	0.24471
421	0.99928	0.96926	0.25144
421.2	0.99928	0.97331	0.25833
421.4	1	0.97735	0.26532
421.6	0.99928	0.98059	0.27248
421.8	0.99855	0.98382	0.27981
422	0.99711	0.98706	0.28715
422.2	0.99566	0.98948	0.29466
422.4	0.9935	0.99191	0.30234
422.6	0.99133	0.99434	0.31011
422.8	0.98844	0.99596	0.31797
423	0.98482	0.99757	0.326
423.2	0.98121	0.99838	0.33412
423.4	0.97759	0.99919	0.34233
423.6	0.97254	1	0.35071
423.8	0.9682	1	0.35918
424	0.96314	1	0.36774
424.2	0.95808	1	0.37639
424.4	0.9523	0.99919	0.3852
424.6	0.94652	0.99838	0.39411
424.8	0.94001	0.99757	0.40302
425	0.93351	0.99596	0.4121
425.2	0.927	0.99353	0.42127
425.4	0.9205	0.99191	0.43052
425.6	0.91399	0.98948	0.43986
425.8	0.90676	0.98706	0.44929
426	0.89954	0.98382	0.45881
426.2	0.89231	0.98059	0.46842
426.4	0.88508	0.97735	0.47802
426.6	0.87785	0.97331	0.4878
426.8	0.87063	0.96926	0.49758
427	0.8634	0.96522	0.50736
427.2	0.85545	0.96118	0.51731
427.4	0.84822	0.95632	0.52727
427.6	0.84099	0.95147	0.53722
427.8	0.83304	0.94662	0.54726
428	0.82581	0.94095	0.55739
428.2	0.81786	0.9361	0.56743
428.4	0.81064	0.93044	0.57756
428.6	0.80269	0.92397	0.58778
428.8	0.79546	0.91831	0.59791
429	0.78751	0.91184	0.60804
429.2	0.77956	0.90536	0.61825
429.4	0.77233	0.89889	0.62838
429.6	0.76438	0.89242	0.63851
429.8	0.75715	0.88514	0.64864
430	0.7492	0.87786	0.65877
430.2	0.74125	0.87058	0.66881
430.4	0.73402	0.8633	0.67876
430.6	0.726	0.85602	0.68872
430.8	0.7182	0.84874	0.69858
431	0.71046	0.84066	0.70836
431.2	0.70273	0.83257	0.71805
431.4	0.69492	0.82448	0.72757
431.6	0.68719	0.81639	0.73709
431.8	0.67946	0.8083	0.74643
432	0.67172	0.79997	0.75569
432.2	0.66399	0.79164	0.76477
432.4	0.65633	0.78323	0.77368
432.6	0.64867	0.77473	0.78241
432.8	0.64115	0.76616	0.79096
433	0.63363	0.75759	0.79943
433.2	0.62619	0.74901	0.80764
433.4	0.61882	0.74036	0.81559
433.6	0.61159	0.73178	0.82345
433.8	0.6045	0.72321	0.83104
434	0.59749	0.71456	0.83846
434.2	0.59063	0.70606	0.84562
434.4	0.58391	0.69749	0.85252
434.6	0.57733	0.68908	0.85925
434.8	0.57097	0.68067	0.86579
435	0.56475	0.67233	0.87199
435.2	0.55868	0.66408	0.87811
435.4	0.55283	0.656	0.88387
435.6	0.54719	0.64791	0.88998
435.8	0.5417	0.63998	0.89522
436	0.53642	0.63222	0.90046
436.2	0.53143	0.62453	0.90482
436.4	0.52652	0.61693	0.91006
436.6	0.52189	0.60957	0.91443
436.8	0.51748	0.60229	0.9188
437	0.51322	0.59517	0.92316
437.2	0.50917	0.58821	0.92753
437.4	0.50534	0.5815	0.93189
437.6	0.50166	0.57487	0.93539
437.8	0.49819	0.56848	0.93888
438	0.49486	0.56217	0.94237
438.2	0.49175	0.5561	0.94674
438.4	0.48879	0.55028	0.94936
438.6	0.48597	0.54454	0.95285
438.8	0.4833	0.53904	0.95634
439	0.48077	0.5337	0.95896
439.2	0.47838	0.5286	0.96245
439.4	0.47614	0.52367	0.96507
439.6	0.47397	0.51881	0.96857
439.8	0.47195	0.51428	0.97119
440	0.47	0.50984	0.97381
440.2	0.46819	0.50563	0.97642
440.4	0.46639	0.5015	0.97904
440.6	0.46472	0.49762	0.98166
440.8	0.46313	0.49382	0.98341
441	0.46161	0.49026	0.98603
441.2	0.46017	0.48678	0.98778
441.4	0.4588	0.48347	0.9904
441.6	0.45742	0.48031	0.99214
441.8	0.45619	0.47724	0.99389
442	0.45489	0.47433	0.99476
442.2	0.45374	0.4715	0.99651
442.4	0.45258	0.46883	0.99738
442.6	0.45142	0.46616	0.99825
442.8	0.45034	0.46365	0.99913
443	0.44926	0.46122	1
443.2	0.44817	0.4588	1
443.4	0.44709	0.45653	1
443.6	0.44608	0.45427	1
443.8	0.44506	0.45208	0.99913
444	0.44398	0.44998	0.99913
444.2	0.44297	0.44788	0.99825
444.4	0.44196	0.44586	0.99651
444.6	0.44087	0.44383	0.99563
444.8	0.43986	0.44189	0.99389
445	0.43878	0.43995	0.99214
445.2	0.43762	0.43801	0.98952
445.4	0.43654	0.43607	0.98778
445.6	0.43538	0.43421	0.98516
445.8	0.43422	0.43235	0.98254
446	0.43299	0.43049	0.97904
446.2	0.43169	0.42863	0.97642
446.4	0.43039	0.42677	0.97293
446.6	0.42909	0.42499	0.96944
446.8	0.42765	0.42321	0.96595
447	0.4262	0.42135	0.96245
447.2	0.42475	0.41965	0.95809
447.4	0.42324	0.41787	0.9546
447.6	0.42165	0.41609	0.95023
447.8	0.41998	0.41439	0.94674
448	0.41832	0.41269	0.94237
448.2	0.41651	0.41099	0.93801
448.4	0.41471	0.4093	0.93451
448.6	0.4129	0.40768	0.93015
448.8	0.41095	0.40598	0.92578
449	0.409	0.40436	0.92142
449.2	0.40697	0.40282	0.91792
449.4	0.40488	0.40121	0.91356
449.6	0.40271	0.39959	0.90919
449.8	0.40054	0.39805	0.9057
450	0.3983	0.39652	0.90133
450.2	0.39599	0.39498	0.89784
450.4	0.39368	0.39344	0.89347
450.6	0.39129	0.39191	0.88998
450.8	0.38883	0.39045	0.88649
451	0.3863	0.38891	0.883
451.2	0.3837	0.38738	0.8795
451.4	0.3811	0.38592	0.87627
451.6	0.37842	0.38438	0.87295
451.8	0.37575	0.38285	0.86981
452	0.373	0.38131	0.86675
452.2	0.37019	0.37969	0.86379
452.4	0.36729	0.37816	0.8609
452.6	0.3644	0.37654	0.85811
452.8	0.36144	0.37492	0.85549
453	0.35848	0.3733	0.85287
453.2	0.35544	0.3716	0.85034
453.4	0.35241	0.3699	0.84798
453.6	0.3493	0.36821	0.84562
453.8	0.34619	0.36643	0.84335
454	0.34301	0.36465	0.84126
454.2	0.33983	0.36279	0.83916
454.4	0.33658	0.36093	0.83715
454.6	0.3334	0.35899	0.83523
454.8	0.33014	0.35704	0.83331
455	0.32689	0.3551	0.83148
455.2	0.32364	0.35308	0.82973
455.4	0.32039	0.35106	0.82807
455.6	0.31713	0.34896	0.82641
455.8	0.31395	0.34677	0.82484
456	0.3107	0.34467	0.82327
456.2	0.30752	0.34248	0.8217
456.4	0.30434	0.34022	0.82022
456.6	0.30116	0.33796	0.81864
456.8	0.29805	0.33569	0.81716
457	0.29502	0.33334	0.81567
457.2	0.29198	0.331	0.81419
457.4	0.28895	0.32857	0.81271
457.6	0.28606	0.32615	0.81122
457.8	0.28317	0.32372	0.80965
458	0.28027	0.32129	0.80808
458.2	0.27753	0.31879	0.80642
458.4	0.27478	0.31636	0.80476
458.6	0.27203	0.31377	0.8031
458.8	0.26943	0.31126	0.80135
459	0.26683	0.30867	0.79952
459.2	0.2643	0.30617	0.7976
459.4	0.26177	0.30358	0.79559
459.6	0.25939	0.30099	0.79358
459.8	0.25693	0.29832	0.7914
460	0.25462	0.29573	0.78922
460.2	0.2523	0.29306	0.78695
460.4	0.24999	0.29048	0.7845
460.6	0.24775	0.28781	0.78206
460.8	0.24551	0.28514	0.77944
461	0.24334	0.28247	0.77673
461.2	0.2411	0.2798	0.77402
461.4	0.23893	0.27713	0.77114
461.6	0.23684	0.27446	0.76817
461.8	0.23467	0.27171	0.76512
462	0.2325	0.26904	0.76206
462.2	0.2304	0.26629	0.75883
462.4	0.22824	0.26362	0.7556
462.6	0.22614	0.26087	0.75228
462.8	0.22397	0.2582	0.74888
463	0.2218	0.25545	0.74538
463.2	0.21971	0.2527	0.74189
463.4	0.21754	0.25003	0.7384
463.6	0.21537	0.24728	0.73482
463.8	0.2132	0.24453	0.73124
464	0.21096	0.24178	0.72757
464.2	0.20879	0.23911	0.72399
464.4	0.20662	0.23636	0.72033
464.6	0.20438	0.23361	0.71675
464.8	0.20222	0.23094	0.71317
465	0.19998	0.22827	0.70959
465.2	0.19781	0.22552	0.70601
465.4	0.19564	0.22286	0.70251
465.6	0.19347	0.22027	0.69911
465.8	0.1913	0.2176	0.69561
466	0.18913	0.21501	0.6923
466.2	0.18704	0.21234	0.68898
466.4	0.18494	0.20983	0.68575
466.6	0.18285	0.20724	0.68252
466.8	0.18082	0.20474	0.67937
467	0.1788	0.20223	0.67632
467.2	0.17685	0.1998	0.67335
467.4	0.1749	0.19738	0.67038
467.6	0.17302	0.19503	0.6675
467.8	0.17114	0.19269	0.6647
468	0.16933	0.19042	0.66191
468.2	0.1676	0.18816	0.6592
468.4	0.16586	0.18597	0.6565
468.6	0.1642	0.18379	0.65388
468.8	0.16254	0.18169	0.65126
469	0.16095	0.17966	0.64864
469.2	0.15943	0.17764	0.64611
469.4	0.15798	0.1757	0.64357
469.6	0.15654	0.17376	0.64095
469.8	0.15509	0.1719	0.63842
470	0.15379	0.17012	0.63589
470.2	0.15242	0.16834	0.63336
470.4	0.15119	0.16656	0.63074
470.6	0.14996	0.16486	0.62812
470.8	0.14873	0.16324	0.6255
471	0.1475	0.16163	0.62279
471.2	0.14642	0.16001	0.62009
471.4	0.14526	0.15847	0.61738
471.6	0.14418	0.15702	0.61458
471.8	0.14309	0.15548	0.6117
472	0.14201	0.15402	0.60882
472.2	0.141	0.15265	0.60585
472.4	0.13999	0.15119	0.60288
472.6	0.13897	0.14982	0.59983
472.8	0.13796	0.14844	0.59677
473	0.13695	0.14715	0.59363
473.2	0.13601	0.14577	0.59049
473.4	0.135	0.14448	0.58725
473.6	0.13406	0.14318	0.58402
473.8	0.13312	0.14189	0.58071
474	0.13218	0.1406	0.57739
474.2	0.13124	0.1393	0.57398
474.4	0.1303	0.13809	0.57066
474.6	0.12943	0.13679	0.56726
474.8	0.12849	0.13558	0.56377
475	0.12763	0.13437	0.56036
475.2	0.12676	0.13307	0.55687
475.4	0.12589	0.13186	0.55346
475.6	0.12502	0.13073	0.54997
475.8	0.12416	0.12951	0.54648
476	0.12329	0.1283	0.54299
476.2	0.1225	0.12717	0.53949
476.4	0.12163	0.12604	0.536
476.6	0.12083	0.1249	0.53251
476.8	0.12004	0.12377	0.52901
477	0.11931	0.12264	0.52552
477.2	0.11852	0.12151	0.52194
477.4	0.11772	0.12045	0.51845
477.6	0.117	0.1194	0.51496
477.8	0.11628	0.11835	0.51138
478	0.11556	0.1173	0.50788
478.2	0.11483	0.11633	0.5043
478.4	0.11411	0.11528	0.50081
478.6	0.11346	0.11431	0.49723
478.8	0.11274	0.11334	0.49365
479	0.11209	0.11245	0.49007
479.2	0.11136	0.11156	0.48649
479.4	0.11071	0.11059	0.48291
479.6	0.11006	0.10978	0.47933
479.8	0.10934	0.10889	0.47566
480	0.10869	0.108	0.47208
480.2	0.10804	0.10719	0.4685
480.4	0.10739	0.10638	0.46484
480.6	0.10674	0.10565	0.46126
480.8	0.10609	0.10484	0.45768
481	0.10544	0.10412	0.4541
481.2	0.10479	0.10331	0.45052
481.4	0.10414	0.10258	0.44694
481.6	0.10341	0.10193	0.44344
481.8	0.10276	0.1012	0.43995
482	0.10211	0.10048	0.43646
482.2	0.10146	0.09983	0.43305
482.4	0.10081	0.09918	0.42965
482.6	0.10016	0.09854	0.42633
482.8	0.09951	0.09789	0.42301
483	0.09893	0.09724	0.41978
483.2	0.09828	0.09659	0.41664
483.4	0.09763	0.09603	0.41358
483.6	0.09698	0.09538	0.41053
483.8	0.0964	0.09481	0.40756
484	0.09575	0.09425	0.40468
484.2	0.09517	0.09368	0.40188
484.4	0.0946	0.09312	0.39917
484.6	0.09402	0.09255	0.39647
484.8	0.09344	0.09198	0.39394
485	0.09286	0.09142	0.3914
485.2	0.09228	0.09085	0.38896
485.4	0.09171	0.09028	0.3866
485.6	0.09113	0.0898	0.38433
485.8	0.09062	0.08923	0.38215
486	0.09004	0.08875	0.38005
486.2	0.08954	0.08818	0.37796
486.4	0.08896	0.0877	0.37595
486.6	0.08845	0.08713	0.37403
486.8	0.08795	0.08664	0.37211
487	0.08744	0.08616	0.37027
487.2	0.08686	0.08565	0.36844
487.4	0.08636	0.08516	0.36669
487.6	0.08585	0.08466	0.36495
487.8	0.08527	0.08416	0.3632
488	0.08477	0.08367	0.36145
488.2	0.08419	0.08318	0.35979
488.4	0.08361	0.08269	0.35814
488.6	0.0831	0.0822	0.35639
488.8	0.08253	0.08171	0.35473
489	0.08195	0.08123	0.35307
489.2	0.0813	0.08074	0.35133
489.4	0.08072	0.08025	0.34958
489.6	0.08014	0.07975	0.34783
489.8	0.07949	0.07926	0.34609
490	0.07884	0.07876	0.34425
490.2	0.07818	0.07826	0.34242
490.4	0.07752	0.07775	0.3405
490.6	0.07684	0.07724	0.33858
490.8	0.07614	0.07672	0.33666
491	0.07544	0.07619	0.33465
491.2	0.07473	0.07567	0.33255
491.4	0.07401	0.07513	0.33054
491.6	0.07327	0.07458	0.32836
491.8	0.07253	0.07403	0.32627
492	0.07179	0.07346	0.324
492.2	0.07103	0.07289	0.32181
492.4	0.07028	0.0723	0.31954
492.6	0.06952	0.0717	0.31727
492.8	0.06876	0.07109	0.31491
493	0.06801	0.07048	0.31264
493.2	0.06725	0.06985	0.31029
493.4	0.0665	0.06921	0.30793
493.6	0.06575	0.06855	0.30557
493.8	0.06501	0.0679	0.30313
494	0.06429	0.06722	0.30077
494.2	0.06357	0.06655	0.29841
494.4	0.06287	0.06585	0.29605
494.6	0.06217	0.06515	0.2937
494.8	0.06149	0.06446	0.29143
495	0.06083	0.06375	0.28907
495.2	0.06018	0.06303	0.2868
495.4	0.05954	0.06232	0.28453
495.6	0.05893	0.06161	0.28235
495.8	0.05833	0.0609	0.28007
496	0.05774	0.06019	0.27798
496.2	0.05718	0.05948	0.2758
496.4	0.05662	0.05878	0.2737
496.6	0.05609	0.05808	0.27169
496.8	0.05557	0.0574	0.2696
497	0.05506	0.05673	0.26768
497.2	0.05456	0.05606	0.26567
497.4	0.05409	0.05542	0.26375
497.6	0.05361	0.05478	0.26191
497.8	0.05315	0.05417	0.25999
498	0.0527	0.05356	0.25816
498.2	0.05225	0.05298	0.25632
498.4	0.05181	0.05241	0.25458
498.6	0.05137	0.05187	0.25283
498.8	0.05093	0.05135	0.25109
499	0.05051	0.05084	0.24934
499.2	0.05007	0.05034	0.24759
499.4	0.04964	0.04987	0.24585
499.6	0.04921	0.04941	0.24419
499.8	0.04878	0.04898	0.24244
500	0.04835	0.04855	0.24078
500.2	0.04791	0.04814	0.23904
500.4	0.04747	0.04774	0.23738
500.6	0.04702	0.04735	0.23563
500.8	0.04658	0.04697	0.23397
501	0.04614	0.0466	0.23223
501.2	0.04569	0.04623	0.23057
501.4	0.04523	0.04586	0.22882
501.6	0.04478	0.04551	0.22707
501.8	0.04434	0.04514	0.22533
502	0.04389	0.04478	0.22358
502.2	0.04345	0.04442	0.22183
502.4	0.04301	0.04405	0.22009
502.6	0.04257	0.04368	0.21834
502.8	0.04214	0.04331	0.2166
503	0.04172	0.04293	0.21485
503.2	0.0413	0.04254	0.2131
503.4	0.0409	0.04215	0.21136
503.6	0.0405	0.04175	0.20961
503.8	0.04011	0.04135	0.20786
504	0.03974	0.04094	0.20621
504.2	0.03937	0.04052	0.20446
504.4	0.03902	0.04011	0.20271
504.6	0.03868	0.03969	0.20105
504.8	0.03835	0.03928	0.19939
505	0.03803	0.03886	0.19774
505.2	0.03773	0.03845	0.19608
505.4	0.03744	0.03803	0.19442
505.6	0.03716	0.03763	0.19285
505.8	0.03689	0.03723	0.19127
506	0.03663	0.03684	0.1897
506.2	0.03639	0.03646	0.18822
506.4	0.03615	0.03608	0.18673
506.6	0.03592	0.03573	0.18525
506.8	0.0357	0.03538	0.18385
507	0.03549	0.03505	0.18237
507.2	0.03528	0.03472	0.18097
507.4	0.03508	0.03443	0.17966
507.6	0.0349	0.03413	0.17826
507.8	0.03471	0.03386	0.17695
508	0.03453	0.03359	0.17573
508.2	0.03435	0.03335	0.17442
508.4	0.03419	0.03312	0.1732
508.6	0.03402	0.03289	0.17198
508.8	0.03386	0.03267	0.17075
509	0.0337	0.03247	0.16953
509.2	0.03355	0.03227	0.1684
509.4	0.0334	0.03209	0.16726
509.6	0.03326	0.0319	0.16604
509.8	0.03311	0.03172	0.1649
510	0.03297	0.03154	0.16377
510.2	0.03283	0.03135	0.16272
510.4	0.0327	0.03117	0.16159
510.6	0.03256	0.03099	0.16045
510.8	0.03243	0.03079	0.15932
511	0.0323	0.0306	0.15818
511.2	0.03217	0.03039	0.15705
511.4	0.03204	0.03018	0.15591
511.6	0.03192	0.02995	0.15486
511.8	0.03179	0.02972	0.15373
512	0.03166	0.02948	0.15259
512.2	0.03152	0.02922	0.15146
512.4	0.03139	0.02895	0.15024
512.6	0.03125	0.02867	0.1491
512.8	0.0311	0.02838	0.14796
513	0.03096	0.02808	0.14683
513.2	0.03081	0.02778	0.14561
513.4	0.03064	0.02747	0.14447
513.6	0.03047	0.02715	0.14334
513.8	0.0303	0.02682	0.14211
514	0.03012	0.02649	0.14098
514.2	0.02992	0.02616	0.13984
514.4	0.02972	0.02583	0.13871
514.6	0.02952	0.0255	0.13749
514.8	0.02929	0.02517	0.13635
515	0.02907	0.02485	0.13522
515.2	0.02883	0.02453	0.13408
515.4	0.02859	0.02423	0.13303
515.6	0.02834	0.02393	0.1319
515.8	0.02808	0.02364	0.13076
516	0.02782	0.02337	0.12972
516.2	0.02755	0.02311	0.12867
516.4	0.02728	0.02286	0.12762
516.6	0.027	0.02263	0.12657
516.8	0.02672	0.02242	0.12561
517	0.02644	0.02223	0.12465
517.2	0.02617	0.02205	0.12369
517.4	0.02589	0.0219	0.12273
517.6	0.02562	0.02176	0.12177
517.8	0.02535	0.02163	0.1209
518	0.02509	0.02152	0.12002
518.2	0.02484	0.02144	0.11915
518.4	0.02458	0.02136	0.11836
518.6	0.02435	0.0213	0.11749
518.8	0.02412	0.02126	0.11671
519	0.0239	0.02122	0.11592
519.2	0.02369	0.02119	0.11522
519.4	0.0235	0.02118	0.11444
519.6	0.02332	0.02117	0.11374
519.8	0.02314	0.02116	0.11304
520	0.02299	0.02116	0.11234
520.2	0.02284	0.02116	0.11164
520.4	0.0227	0.02116	0.11094
520.6	0.02258	0.02116	0.11024
520.8	0.02246	0.02116	0.10963
521	0.02236	0.02115	0.10893
521.2	0.02226	0.02114	0.10832
521.4	0.02217	0.02113	0.10762
521.6	0.02209	0.0211	0.10701
521.8	0.02202	0.02106	0.10631
522	0.02194	0.02102	0.10562
522.2	0.02188	0.02097	0.10501
522.4	0.02181	0.02091	0.10431
522.6	0.02176	0.02084	0.10361
522.8	0.0217	0.02076	0.10291
523	0.02164	0.02067	0.10221
523.2	0.02158	0.02057	0.10151
523.4	0.02153	0.02046	0.10081
523.6	0.02147	0.02034	0.10003
523.8	0.02141	0.02022	0.09933
524	0.02134	0.02009	0.09854
524.2	0.02128	0.01996	0.09776
524.4	0.02121	0.01983	0.09697
524.6	0.02114	0.01969	0.09619
524.8	0.02107	0.01955	0.0954
525	0.021	0.01941	0.09461
525.2	0.02092	0.01927	0.09383
525.4	0.02084	0.01913	0.09296
525.6	0.02075	0.01899	0.09217
525.8	0.02067	0.01886	0.09135
526	0.02057	0.01873	0.09052
526.2	0.02048	0.01861	0.08969
526.4	0.02039	0.01849	0.08886
526.6	0.0203	0.01838	0.08803
526.8	0.0202	0.01827	0.08721
527	0.0201	0.01818	0.08638
527.2	0.02	0.01808	0.08556
527.4	0.0199	0.01799	0.08475
527.6	0.0198	0.01791	0.08394
527.8	0.0197	0.01784	0.08314
528	0.01959	0.01776	0.08235
528.2	0.01949	0.0177	0.08156
528.4	0.01939	0.01763	0.08078
528.6	0.01928	0.01757	0.08001
528.8	0.01917	0.0175	0.07925
529	0.01907	0.01745	0.0785
529.2	0.01896	0.01739	0.07774
529.4	0.01885	0.01733	0.077
529.6	0.01874	0.01727	0.07628
529.8	0.01863	0.01721	0.07555
530	0.01852	0.01714	0.07484
530.2	0.0184	0.01708	0.07412
530.4	0.01829	0.017	0.07342
530.6	0.01817	0.01693	0.07272
530.8	0.01806	0.01685	0.07203
531	0.01793	0.01677	0.07134
531.2	0.01781	0.01668	0.07067
531.4	0.01769	0.01659	0.07
531.6	0.01756	0.01649	0.06933
531.8	0.01744	0.0164	0.06867
532	0.01732	0.0163	0.06802
532.2	0.01719	0.01619	0.06736
532.4	0.01707	0.01609	0.06673
532.6	0.01694	0.01598	0.0661
532.8	0.01681	0.01588	0.06547
533	0.01668	0.01578	0.06486
533.2	0.01656	0.01568	0.06425
533.4	0.01643	0.01557	0.06365
533.6	0.01631	0.01547	0.06306
533.8	0.01619	0.01538	0.06248
534	0.01607	0.01529	0.06191
534.2	0.01595	0.0152	0.06136
534.4	0.01584	0.01512	0.06081
534.6	0.01573	0.01505	0.06028
534.8	0.01562	0.01497	0.05976
535	0.01552	0.01491	0.05925
535.2	0.01542	0.01485	0.05875
535.4	0.01532	0.01479	0.05826
535.6	0.01523	0.01475	0.05779
535.8	0.01514	0.0147	0.05733
536	0.01506	0.01466	0.05687
536.2	0.01498	0.01462	0.05643
536.4	0.0149	0.01458	0.05599
536.6	0.01482	0.01454	0.05557
536.8	0.01475	0.01451	0.05515
537	0.01468	0.01448	0.05475
537.2	0.01462	0.01444	0.05434
537.4	0.01455	0.0144	0.05395
537.6	0.01449	0.01436	0.05357
537.8	0.01443	0.01431	0.05318
538	0.01437	0.01425	0.05282
538.2	0.0143	0.01419	0.05245
538.4	0.01425	0.01412	0.05209
538.6	0.01419	0.01404	0.05174
538.8	0.01413	0.01395	0.0514
539	0.01407	0.01386	0.05106
539.2	0.014	0.01375	0.05074
539.4	0.01394	0.01364	0.05042
539.6	0.01387	0.01352	0.05012
539.8	0.0138	0.01338	0.04982
540	0.01373	0.01324	0.04953
540.2	0.01366	0.01309	0.04925
540.4	0.01358	0.01293	0.04899
540.6	0.0135	0.01277	0.04875
540.8	0.01342	0.0126	0.04851
541	0.01333	0.01243	0.04829
541.2	0.01324	0.01225	0.04808
541.4	0.01315	0.01208	0.04789
541.6	0.01306	0.0119	0.04771
541.8	0.01296	0.01173	0.04754
542	0.01287	0.01156	0.04739
542.2	0.01277	0.0114	0.04725
542.4	0.01267	0.01124	0.04712
542.6	0.01258	0.0111	0.047
542.8	0.01248	0.01096	0.0469
543	0.01238	0.01083	0.04679
543.2	0.01228	0.01072	0.0467
543.4	0.01219	0.01062	0.0466
543.6	0.01209	0.01054	0.04651
543.8	0.012	0.01047	0.04642
544	0.01191	0.01042	0.04633
544.2	0.01182	0.01039	0.04622
544.4	0.01174	0.01037	0.04612
544.6	0.01166	0.01037	0.04601
544.8	0.01158	0.01038	0.04587
545	0.0115	0.01041	0.04573
545.2	0.01143	0.01045	0.04557
545.4	0.01137	0.0105	0.04539
545.6	0.0113	0.01057	0.04519
545.8	0.01125	0.01064	0.04498
546	0.01119	0.01073	0.04474
546.2	0.01114	0.01082	0.04448
546.4	0.01109	0.01091	0.04419
546.6	0.01105	0.01101	0.04388
546.8	0.01101	0.01111	0.04355
547	0.01098	0.0112	0.04319
547.2	0.01095	0.01129	0.04282
547.4	0.01092	0.01138	0.04242
547.6	0.01089	0.01146	0.04201
547.8	0.01087	0.01153	0.04157
548	0.01085	0.01159	0.04112
548.2	0.01083	0.01163	0.04065
548.4	0.01082	0.01166	0.04018
548.6	0.01081	0.01167	0.03969
548.8	0.0108	0.01167	0.0392
549	0.01079	0.01165	0.03871
549.2	0.01079	0.01162	0.03821
549.4	0.01078	0.01156	0.03772
549.6	0.01078	0.01149	0.03722
549.8	0.01078	0.0114	0.03673
550	0.01079	0.01129	0.03626
550.2	0.01079	0.01116	0.03579
550.4	0.0108	0.01102	0.03533
550.6	0.01081	0.01086	0.03489
550.8	0.01082	0.01069	0.03445
551	0.01083	0.01051	0.03404
551.2	0.01084	0.01032	0.03364
551.4	0.01085	0.01011	0.03326
551.6	0.01087	0.0099	0.03289
551.8	0.01089	0.00969	0.03255
552	0.01091	0.00946	0.03222
552.2	0.01093	0.00924	0.03189
552.4	0.01095	0.00902	0.0316
552.6	0.01097	0.0088	0.03131
552.8	0.01099	0.00858	0.03104
553	0.01101	0.00836	0.03078
553.2	0.01103	0.00816	0.03053
553.4	0.01105	0.00796	0.03029
553.6	0.01107	0.00776	0.03006
553.8	0.01109	0.00758	0.02983
554	0.01111	0.00741	0.02962
554.2	0.01112	0.00725	0.02941
554.4	0.01113	0.0071	0.02921
554.6	0.01113	0.00697	0.029
554.8	0.01114	0.00685	0.0288
555	0.01113	0.00674	0.02859
555.2	0.01112	0.00664	0.02839
555.4	0.01111	0.00656	0.0282
555.6	0.01108	0.00648	0.028
555.8	0.01106	0.00642	0.0278
556	0.01102	0.00637	0.0276
556.2	0.01097	0.00634	0.02741
556.4	0.01092	0.00631	0.02721
556.6	0.01086	0.00629	0.02701
556.8	0.01078	0.00628	0.02681
557	0.0107	0.00627	0.02662
557.2	0.01061	0.00628	0.02644
557.4	0.01051	0.00629	0.02625
557.6	0.01041	0.0063	0.02606
557.8	0.01029	0.00632	0.02589
558	0.01017	0.00634	0.02571
558.2	0.01004	0.00637	0.02555
558.4	0.00991	0.0064	0.02538
558.6	0.00977	0.00643	0.02522
558.8	0.00962	0.00646	0.02507
559	0.00947	0.00649	0.02492
559.2	0.00932	0.00653	0.02478
559.4	0.00917	0.00656	0.02464
559.6	0.00902	0.00659	0.02451
559.8	0.00887	0.00662	0.02438
560	0.00873	0.00665	0.02425
560.2	0.00859	0.00668	0.02412
560.4	0.00845	0.00671	0.024
560.6	0.00833	0.00673	0.02388
560.8	0.00821	0.00675	0.02376
561	0.0081	0.00677	0.02363
561.2	0.008	0.00679	0.0235
561.4	0.00791	0.00681	0.02337
561.6	0.00784	0.00682	0.02324
561.8	0.00778	0.00683	0.02311
562	0.00774	0.00684	0.02296
562.2	0.00771	0.00684	0.02281
562.4	0.00769	0.00684	0.02267
562.6	0.00769	0.00684	0.02251
562.8	0.00771	0.00683	0.02234
563	0.00774	0.00682	0.02217
563.2	0.00778	0.00681	0.02199
563.4	0.00784	0.00679	0.02182
563.6	0.00791	0.00676	0.02164
563.8	0.00799	0.00674	0.02145
564	0.00808	0.00671	0.02127
564.2	0.00818	0.00667	0.02109
564.4	0.00829	0.00663	0.0209
564.6	0.0084	0.00659	0.02073
564.8	0.00852	0.00654	0.02055
565	0.00864	0.00649	0.02039
565.2	0.00877	0.00644	0.02023
565.4	0.00889	0.00638	0.02008
565.6	0.00901	0.00632	0.01995
565.8	0.00912	0.00626	0.01983
566	0.00923	0.00619	0.01972
566.2	0.00933	0.00613	0.01964
566.4	0.00942	0.00606	0.01957
566.6	0.00951	0.00599	0.01951
566.8	0.00958	0.00592	0.01948
567	0.00964	0.00585	0.01946
567.2	0.00969	0.00578	0.01946
567.4	0.00972	0.00571	0.01948
567.6	0.00974	0.00564	0.01952
567.8	0.00975	0.00557	0.01957
568	0.00974	0.00551	0.01964
568.2	0.00971	0.00544	0.01973
568.4	0.00968	0.00538	0.01984
568.6	0.00962	0.00532	0.01994
568.8	0.00956	0.00527	0.02006
569	0.00948	0.00522	0.02019
569.2	0.00939	0.00517	0.02032
569.4	0.00929	0.00512	0.02045
569.6	0.00918	0.00508	0.02058
569.8	0.00906	0.00505	0.02071
570	0.00894	0.00501	0.02082
570.2	0.0088	0.00499	0.02094
570.4	0.00866	0.00496	0.02103
570.6	0.00852	0.00494	0.02112
570.8	0.00837	0.00493	0.02119
571	0.00822	0.00492	0.02123
571.2	0.00807	0.00492	0.02126
571.4	0.00792	0.00492	0.02127
571.6	0.00777	0.00492	0.02125
571.8	0.00762	0.00493	0.02121
572	0.00748	0.00494	0.02114
572.2	0.00733	0.00496	0.02104
572.4	0.0072	0.00498	0.02092
572.6	0.00706	0.00501	0.02077
572.8	0.00694	0.00504	0.0206
573	0.00682	0.00507	0.0204
573.2	0.0067	0.00511	0.02019
573.4	0.00659	0.00515	0.01995
573.6	0.00649	0.0052	0.01969
573.8	0.0064	0.00525	0.01941
574	0.00631	0.0053	0.01912
574.2	0.00623	0.00535	0.01881
574.4	0.00616	0.0054	0.01849
574.6	0.00609	0.00546	0.01817
574.8	0.00604	0.00552	0.01784
575	0.00599	0.00557	0.01751
575.2	0.00595	0.00563	0.01717
575.4	0.00591	0.00569	0.01685
575.6	0.00588	0.00574	0.01653
575.8	0.00586	0.00579	0.01621
576	0.00585	0.00584	0.01591
576.2	0.00584	0.00589	0.01562
576.4	0.00583	0.00593	0.01534
576.6	0.00584	0.00597	0.01508
576.8	0.00584	0.006	0.01483
577	0.00585	0.00603	0.01462
577.2	0.00587	0.00605	0.01441
577.4	0.00589	0.00606	0.01423
577.6	0.00591	0.00607	0.01407
577.8	0.00593	0.00607	0.01393
578	0.00596	0.00606	0.01382
578.2	0.00599	0.00605	0.01372
578.4	0.00601	0.00603	0.01365
578.6	0.00604	0.006	0.0136
578.8	0.00607	0.00596	0.01356
579	0.00609	0.00592	0.01355
579.2	0.00612	0.00586	0.01355
579.4	0.00614	0.00581	0.01357
579.6	0.00616	0.00574	0.0136
579.8	0.00618	0.00567	0.01364
580	0.00619	0.00559	0.01369
580.2	0.0062	0.00552	0.01375
580.4	0.0062	0.00543	0.01382
580.6	0.0062	0.00535	0.01389
580.8	0.00619	0.00526	0.01396
581	0.00618	0.00517	0.01403
581.2	0.00617	0.00508	0.0141
581.4	0.00615	0.00499	0.01417
581.6	0.00613	0.00491	0.01422
581.8	0.0061	0.00482	0.01427
582	0.00607	0.00474	0.01431
582.2	0.00604	0.00466	0.01434
582.4	0.006	0.00459	0.01435
582.6	0.00597	0.00453	0.01435
582.8	0.00593	0.00447	0.01434
583	0.00589	0.00441	0.01431
583.2	0.00584	0.00437	0.01426
583.4	0.0058	0.00433	0.01419
583.6	0.00576	0.0043	0.0141
583.8	0.00573	0.00428	0.01399
584	0.00569	0.00426	0.01387
584.2	0.00566	0.00426	0.01372
584.4	0.00563	0.00426	0.01356
584.6	0.0056	0.00427	0.01338
584.8	0.00558	0.00429	0.01318
585	0.00556	0.00432	0.01297
585.2	0.00555	0.00436	0.01274
585.4	0.00554	0.0044	0.01249
585.6	0.00554	0.00445	0.01224
585.8	0.00555	0.0045	0.01197
586	0.00556	0.00456	0.0117
586.2	0.00557	0.00463	0.01142
586.4	0.00559	0.0047	0.01113
586.6	0.00562	0.00477	0.01085
586.8	0.00565	0.00484	0.01056
587	0.00569	0.00492	0.01027
587.2	0.00573	0.005	0.00999
587.4	0.00578	0.00508	0.00971
587.6	0.00582	0.00516	0.00944
587.8	0.00588	0.00524	0.00919
588	0.00593	0.00531	0.00894
588.2	0.00599	0.00539	0.00871
588.4	0.00604	0.00546	0.00849
588.6	0.0061	0.00553	0.00829
588.8	0.00616	0.00559	0.00811
589	0.00622	0.00564	0.00795
589.2	0.00627	0.0057	0.00781
589.4	0.00632	0.00574	0.00769
589.6	0.00637	0.00577	0.00759
589.8	0.00642	0.0058	0.00751
590	0.00646	0.00582	0.00744
590.2	0.00649	0.00583	0.0074
590.4	0.00651	0.00582	0.00738
590.6	0.00653	0.00581	0.00737
590.8	0.00654	0.00578	0.00738
591	0.00653	0.00573	0.0074
591.2	0.00651	0.00568	0.00743
591.4	0.00648	0.00561	0.00747
591.6	0.00644	0.00552	0.00752
591.8	0.00638	0.00542	0.00757
592	0.0063	0.0053	0.00762
592.2	0.0062	0.00516	0.00767
592.4	0.00609	0.00501	0.00772
592.6	0.00595	0.00483	0.00776
592.8	0.00579	0.00465	0.00779
593	0.00562	0.00444	0.00781
593.2	0.00542	0.00422	0.00782
593.4	0.0052	0.00398	0.00781
593.6	0.00496	0.00372	0.00779
593.8	0.0047	0.00346	0.00774
594	0.00442	0.00318	0.00768
594.2	0.00412	0.00289	0.00759
594.4	0.00381	0.00259	0.00748
594.6	0.00348	0.00229	0.00736
594.8	0.00314	0.00199	0.00721
595	0.0028	0.00169	0.00704
595.2	0.00245	0.0014	0.00686
595.4	0.0021	0.00113	0.00667
595.6	0.00176	0.000864662	0.00646
595.8	0.00143	0.000626051	0.00625
596	0.00112	0.000416558	0.00603
596.2	0.00082973	0.000241847	0.00581
596.4	0.000570982	0.000109195	0.00559
596.6	0.000350539	2.66921e-05	0.00539
596.8	0.000176354	0	0.0052
597	5.63754e-05	3.88249e-05	0.00503
597.2	0	0.000150446	0.00489
597.4	1.44552e-05	0.000343762	0.00478
597.6	0.000110583	0.00062686	0.00472
597.8	0.000296332	0.00101	0.0047
598	0.000582546	0.0015	0.00474
598.2	0.000977897	0.00211	0.00484
598.4	0.00149	0.00284	0.00501
598.6	0.00214	0.00371	0.00526
598.8	0.00292	0.00472	0.00559
599	0.00385	0.00588	0.00601
599.2	0.00494	0.00721	0.00653
599.4	0.00619	0.00871	0.00715
599.6	0.00762	0.01039	0.00789
599.8	0.00923	0.01225	0.00875
600	0.01105	0.01432	0.00973
