# Supplementary material for: Achieving Robust Cholesteric Liquid Crystal Polymer Networks with High Luminescence Dissymmetry Factor
Source: Research Square preprint supplement (doi:10.21203/rs.3.rs-7436711/v1), 2025-09-17
Supplement: Supplementary file 6 [file 7cd5a1ea9449c77fb7f5e7d9.xlsx]

## Sheet: Sheet1
	FC1		FC6		PC6
26.29	100.023	25.234	100	25.309	99.9873
28.218	100.055	26.472	100.009	27.499	99.9813
30.598	100.081	27.457	99.9983	30.092	99.9656
33.308	100.068	28.933	100.016	33.006	99.9677
36.264	100.07	30.863	100.009	36.143	99.9708
39.31	100.083	33.277	100.052	39.304	99.9604
42.428	100.079	36.003	100.044	42.457	99.9453
45.487	100.093	38.93	100.037	45.566	99.9433
48.486	100.098	41.955	100.032	48.607	99.9269
51.393	100.085	45.045	100.052	51.545	99.8997
54.222	100.085	48.072	100.057	54.349	99.8993
56.963	100.094	51.057	100.038	57.1	99.8997
59.649	100.096	53.969	100.037	59.731	99.8905
62.232	100.082	56.765	100.043	62.319	99.8572
64.784	100.075	59.527	100.016	64.854	99.8217
67.279	100.07	62.175	99.9939	67.331	99.8125
69.766	100.091	64.773	100.001	69.795	99.8008
72.216	100.06	67.3	100.008	72.221	99.7518
74.664	100.051	69.839	100.001	74.664	99.7306
77.083	100.04	72.269	99.9882	77.096	99.6929
79.552	100.037	74.712	100.015	79.544	99.6931
82.007	100.033	77.165	100.015	82.022	99.6792
84.487	100.029	79.62	100.011	84.481	99.6586
86.973	100.01	82.066	99.997	86.971	99.6345
89.455	100.004	84.548	99.9911	89.468	99.5895
91.958	100.014	87.029	99.9981	91.981	99.5675
94.499	100.02	89.536	99.9853	94.501	99.5259
97.018	100.023	92.032	100.003	97.033	99.5016
99.538	100.013	94.543	99.9979	99.532	99.5041
102.066	100.004	97.056	100.003	102.058	99.4298
104.589	99.9966	99.573	99.9953	104.567	99.3908
107.096	99.972	102.12	99.9988	107.068	99.3747
109.597	99.9734	104.584	99.98	109.578	99.3376
112.101	99.9853	107.111	99.9606	112.077	99.2883
114.59	99.9756	109.584	99.9571	114.573	99.2589
117.077	99.9789	112.085	99.9584	117.052	99.2266
119.599	99.9684	114.604	99.9585	119.545	99.174
122.095	99.9891	117.088	99.9335	122.065	99.1163
124.574	99.9961	119.589	99.9551	124.551	99.0487
127.064	100.013	122.074	99.9265	127.046	98.9935
129.589	100.015	124.564	99.9159	129.564	98.9534
132.093	100.021	127.077	99.9149	132.082	98.8932
134.585	100.031	129.583	99.919	134.564	98.8226
137.124	100.051	132.077	99.885	137.081	98.7797
139.614	100.029	134.584	99.8663	139.578	98.7278
142.137	100.031	137.098	99.8452	142.094	98.6705
144.653	100.056	139.611	99.836	144.593	98.6273
147.179	100.049	142.115	99.8298	147.126	98.5512
149.667	100.039	144.637	99.8257	149.629	98.4909
152.16	100.048	147.142	99.811	152.127	98.4243
154.665	100.028	149.652	99.8034	154.645	98.3312
157.184	100.017	152.162	99.7859	157.128	98.2612
159.677	100.013	154.656	99.7814	159.65	98.2131
162.158	100.004	157.171	99.7579	162.138	98.1122
164.648	99.9911	159.674	99.7619	164.623	98.0255
167.155	99.9751	162.168	99.7593	167.103	97.9544
169.633	99.9647	164.658	99.7387	169.601	97.8779
172.15	99.9546	167.144	99.7166	172.115	97.7941
174.613	99.944	169.64	99.6979	174.602	97.7136
177.121	99.9308	172.131	99.702	177.113	97.6208
179.625	99.9424	174.639	99.689	179.617	97.5164
182.116	99.9239	177.142	99.6599	182.096	97.418
184.611	99.9278	179.648	99.6407	184.615	97.3143
187.105	99.9235	182.14	99.6128	187.118	97.2101
189.616	99.9139	184.645	99.6325	189.619	97.0806
192.125	99.9185	187.152	99.5977	192.118	96.971
194.618	99.9232	189.656	99.5675	194.639	96.8685
197.14	99.8785	192.167	99.5497	197.124	96.7463
199.63	99.8948	194.67	99.5495	199.626	96.6399
202.137	99.8951	197.162	99.5234	202.143	96.4975
204.656	99.8831	199.672	99.5286	204.646	96.3982
207.156	99.8849	202.18	99.4885	207.14	96.2608
209.638	99.8758	204.678	99.4367	209.637	96.1403
212.156	99.8948	207.179	99.4353	212.141	95.9906
214.659	99.8975	209.674	99.407	214.636	95.8327
217.139	99.9027	212.164	99.3875	217.126	95.656
219.651	99.893	214.669	99.3695	219.624	95.4342
222.13	99.8993	217.166	99.3407	222.146	95.1849
224.651	99.9144	219.674	99.3158	224.629	94.9246
227.135	99.8996	222.171	99.2644	227.133	94.6333
229.648	99.8853	224.657	99.2109	229.626	94.3746
232.13	99.8864	227.151	99.1743	232.144	94.0531
234.65	99.878	229.664	99.1434	234.629	93.7565
237.148	99.8759	232.158	99.1222	237.141	93.4738
239.64	99.89	234.67	99.0656	239.628	93.1728
242.154	99.8832	237.159	99.0353	242.141	92.9013
244.65	99.8893	239.651	98.9982	244.637	92.604
247.168	99.875	242.169	98.9427	247.136	92.2848
249.658	99.8976	244.66	98.9045	249.633	92.0111
252.158	99.8951	247.153	98.8728	252.148	91.7052
254.653	99.8908	249.659	98.7843	254.635	91.3977
257.146	99.8856	252.153	98.7172	257.142	91.1092
259.644	99.8904	254.652	98.6576	259.654	90.8201
262.152	99.8625	257.148	98.5949	262.139	90.5275
264.638	99.8673	259.656	98.5147	264.64	90.2366
267.163	99.8723	262.161	98.4407	267.141	89.9501
269.678	99.845	264.665	98.3586	269.654	89.6707
272.147	99.8403	267.171	98.2762	272.141	89.3744
274.67	99.8285	269.678	98.2174	274.642	89.1017
277.151	99.7969	272.172	98.1294	277.144	88.8026
279.65	99.7796	274.675	98.0373	279.643	88.5058
282.15	99.7612	277.172	97.9692	282.152	88.2329
284.645	99.7648	279.695	97.8893	284.634	87.9295
287.148	99.7479	282.181	97.8	287.156	87.6295
289.639	99.7364	284.678	97.7101	289.651	87.3295
292.142	99.7279	287.161	97.6124	292.142	87.0296
294.63	99.7095	289.681	97.5411	294.654	86.7278
297.131	99.6863	292.167	97.4445	297.136	86.3977
299.612	99.6585	294.665	97.3687	299.645	86.0606
302.116	99.6647	297.175	97.2995	302.122	85.714
304.644	99.6496	299.667	97.1768	304.626	85.3624
307.138	99.6264	302.165	97.0751	307.129	85.0115
309.616	99.627	304.651	96.9908	309.628	84.6555
312.128	99.5954	307.164	96.872	312.123	84.3015
314.635	99.5772	309.665	96.7998	314.62	83.9352
317.125	99.5648	312.148	96.7069	317.111	83.5633
319.626	99.5517	314.654	96.6012	319.622	83.1865
322.143	99.5161	317.163	96.5136	322.133	82.8427
324.632	99.5098	319.657	96.417	324.614	82.5026
327.131	99.4731	322.152	96.3248	327.124	82.0994
329.627	99.4554	324.627	96.2374	329.627	81.7489
332.146	99.407	327.138	96.1411	332.129	81.4142
334.638	99.3931	329.627	96.0504	334.625	81.0818
337.129	99.3527	332.14	95.9773	337.128	80.7631
339.644	99.3112	334.644	95.9001	339.61	80.4368
342.137	99.2495	337.153	95.7942	342.134	80.1368
344.639	99.1972	339.654	95.7022	344.61	79.8317
347.151	99.122	342.154	95.6231	347.136	79.5348
349.646	99.0446	344.66	95.5478	349.606	79.2424
352.139	98.9439	347.162	95.4493	352.12	78.9677
354.643	98.8599	349.654	95.3729	354.604	78.6959
357.143	98.7622	352.175	95.2839	357.116	78.392
359.646	98.6344	354.664	95.2104	359.613	78.1312
362.131	98.4904	357.159	95.1431	362.106	77.8586
364.632	98.3329	359.649	95.0649	364.599	77.6119
367.114	98.1523	362.148	94.9738	367.101	77.3446
369.612	97.9549	364.654	94.9163	369.593	77.0738
372.119	97.754	367.155	94.8137	372.102	76.8075
374.621	97.5672	369.645	94.7327	374.604	76.5557
377.129	97.334	372.145	94.6382	377.107	76.3066
379.607	97.1653	374.64	94.5227	379.603	76.0448
382.119	96.9317	377.149	94.4307	382.082	75.8166
384.602	96.7054	379.638	94.3287	384.603	75.5625
387.109	96.4798	382.134	94.2347	387.086	75.344
389.602	96.2482	384.622	94.1157	389.597	75.0775
392.106	96.0096	387.123	93.9952	392.098	74.8297
394.609	95.7741	389.627	93.8371	394.597	74.5656
397.089	95.5436	392.121	93.6782	397.091	74.2969
399.588	95.2771	394.629	93.4875	399.586	73.9683
402.085	94.9752	397.118	93.2738	402.085	73.6827
404.603	94.6705	399.637	93.0286	404.592	73.337
407.091	94.334	402.13	92.7364	407.078	72.9808
409.582	93.9636	404.617	92.4362	409.574	72.5789
412.096	93.5173	407.133	92.0774	412.084	72.169
414.577	92.9504	409.637	91.6754	414.592	71.6637
417.095	92.292	412.135	91.2365	417.106	71.1157
419.589	91.6184	414.629	90.7085	419.611	70.392
422.091	90.7814	417.13	90.1197	422.126	69.6289
424.592	89.8841	419.632	89.4127	424.613	68.7887
427.091	88.9196	422.137	88.5723	427.119	67.8155
429.602	87.8707	424.629	87.547	429.629	66.6825
432.114	86.728	427.132	86.2935	432.123	65.4163
434.614	85.4952	429.637	84.8503	434.645	64.0049
437.116	84.0973	432.13	83.2084	437.111	62.4523
439.61	82.579	434.617	81.4045	439.612	60.7426
442.103	81.2042	437.107	79.3418	442.114	58.8766
444.618	79.6657	439.611	76.9925	444.59	56.89
447.122	77.8131	442.115	74.4228	447.095	54.8051
449.62	75.7291	444.633	71.2292	449.584	52.687
452.131	73.6974	447.144	68.1484	452.092	50.5013
454.611	71.8334	449.647	65.0078	454.591	48.3046
457.121	70.0603	452.132	61.8397	457.077	46.2307
459.639	68.3567	454.638	58.7169	459.582	44.1706
462.13	66.7557	457.132	55.6301	462.091	42.2461
464.617	65.3087	459.639	52.7637	464.586	40.4892
467.121	63.9087	462.13	50.1063	467.085	38.9435
469.633	62.6235	464.617	47.6949	469.584	37.6218
472.107	61.4443	467.134	45.5368	472.065	36.4806
474.619	60.3196	469.605	43.6084	474.574	35.5086
477.116	59.2281	472.12	41.9228	477.071	34.7381
479.611	58.1766	474.619	40.4364	479.562	34.0795
482.115	57.1724	477.117	39.1669	482.057	33.5405
484.601	56.2127	479.601	38.0213	484.557	33.074
487.115	55.3098	482.094	36.9883	487.07	32.6912
489.598	54.4037	484.601	36.0714	489.548	32.345
492.099	53.5713	487.099	35.2422	492.06	32.0455
494.587	52.7665	489.605	34.4595	494.573	31.7646
497.087	52.0064	492.092	33.7473	497.065	31.5219
499.589	51.2734	494.6	33.0589	499.584	31.274
502.078	50.554	497.103	32.4293	502.076	31.0485
504.595	49.9115	499.615	31.8315	504.589	30.8499
507.09	49.2668	502.112	31.2721	507.082	30.6412
509.591	48.6668	504.616	30.6997	509.587	30.4458
512.082	48.074	507.11	30.173	512.08	30.2174
514.598	47.516	509.627	29.6518	514.585	30.0025
517.083	46.9741	512.122	29.1616	517.078	29.7862
519.573	46.4909	514.635	28.6985	519.582	29.5724
522.084	45.99	517.11	28.2481	522.083	29.3491
524.593	45.5368	519.635	27.824	524.577	29.111
527.085	45.078	522.127	27.429	527.083	28.8811
529.587	44.6534	524.618	27.0428	529.568	28.6252
532.092	44.2409	527.121	26.6974	532.072	28.3723
534.58	43.8442	529.629	26.3722	534.583	28.1041
537.086	43.4761	532.118	26.0859	537.077	27.8296
539.598	43.1083	534.599	25.8243	539.564	27.5821
542.09	42.7711	537.121	25.5721	542.056	27.2419
544.607	42.4361	539.608	25.3544	544.558	26.9527
547.099	42.1245	542.124	25.1603	547.072	26.6406
549.595	41.8037	544.608	25.0293	549.574	26.3379
552.107	41.4681	547.116	24.8589	552.062	26.0098
554.616	41.1382	549.621	24.7167	554.565	25.6958
557.133	40.8478	552.134	24.6157	557.074	25.378
559.626	40.5502	554.62	24.5099	559.55	25.0609
562.138	40.2778	557.104	24.4374	562.069	24.7227
564.628	39.9991	559.618	24.3804	564.572	24.4012
567.128	39.766	562.12	24.2987	567.066	24.1209
569.624	39.5002	564.62	24.2565	569.576	23.833
572.132	39.2507	567.114	24.229	572.076	23.5619
574.636	39.027	569.625	24.1931	574.573	23.2948
577.135	38.7893	572.119	24.1792	577.073	23.0561
579.619	38.5615	574.625	24.1573	579.57	22.8455
582.147	38.3233	577.123	24.1412	582.078	22.6762
584.647	38.1051	579.618	24.1201	584.581	22.5073
587.136	37.8911	582.096	24.0747	587.072	22.3632
589.633	37.6698	584.607	24.0605	589.563	22.2371
592.135	37.4422	587.108	24.0337	592.07	22.1209
594.63	37.2223	589.615	24.023	594.566	22.0271
597.14	36.9998	592.124	24.0007	597.078	21.9504
		594.62	23.975
		597.133	23.9457
