# Supplementary material for: Achieving Robust Cholesteric Liquid Crystal Polymer Networks with High Luminescence Dissymmetry Factor
Source: Research Square preprint supplement (doi:10.21203/rs.3.rs-7436711/v1), 2025-09-17
Supplement: Supplementary file 7 [file 842e1d763ccfa29908968240.xlsx]

## Sheet: Sheet1
CPL					CD
	(S-M)0.01-(FC1)0.99	(S-M)0.03-(FC1)0.97	(S-M)0.05-(FC1)0.95	(S-M)0.1-(FC1)0.9		(S-M)0.01-(FC1)0.99	(S-M)0.03-(FC1)0.97	(S-M)0.05-(FC1)0.95	(S-M)0.1-(FC1)0.9
700	0.24583	0.92001	0.80099	0.47073	700	0.0124	0.00573	0.00548	0.00578
699.9	0.7292	0.99638	0.84694	0.60645	699.9	0.01239	0.00573	0.00553	0.00577
699.8	0.78888	0.73416	0.82417	0.64971	699.8	0.01238	0.00573	0.00552	0.0058
699.7	0.29634	0.7168	0.70382	0.61917	699.7	0.01238	0.00575	0.00548	0.00586
699.6	-0.30249	0.71824	0.67472	0.48595	699.6	0.01237	0.00572	0.00548	0.0059
699.5	-0.55938	0.69272	0.59874	0.52623	699.5	0.01236	0.00577	0.00549	0.00593
699.4	-0.86765	0.92478	0.74958	0.38101	699.4	0.01236	0.00579	0.00549	0.00593
699.3	-0.99051	0.82542	0.62002	0.44511	699.3	0.0124	0.00579	0.00549	0.00593
699.2	-1.35103	0.99582	0.5472	0.6475	699.2	0.01243	0.00582	0.00551	0.0059
699.1	-0.59615	0.96557	0.41095	0.5956	699.1	0.01242	0.00582	0.0055	0.00589
699	-0.53677	1.01715	0.11279	0.67501	699	0.01244	0.00578	0.00551	0.00591
698.9	-0.59152	1.09916	0.08988	0.93429	698.9	0.01242	0.00576	0.0055	0.00591
698.8	-0.66097	0.9247	0.29139	0.74563	698.8	0.01239	0.00578	0.00552	0.00592
698.7	-0.8838	1.07879	0.25401	0.73767	698.7	0.01241	0.0058	0.0055	0.00592
698.6	-0.89391	1.35545	0.45518	0.82828	698.6	0.01242	0.00579	0.00552	0.00592
698.5	-1.02906	1.27371	0.36761	0.81331	698.5	0.01245	0.00579	0.00552	0.00594
698.4	-0.39361	1.47677	0.48698	0.8737	698.4	0.01247	0.00581	0.00556	0.00597
698.3	-0.26409	1.4844	0.52644	0.98836	698.3	0.0125	0.00582	0.00556	0.00602
698.2	0.13272	1.47242	0.26576	0.79574	698.2	0.01251	0.00582	0.00555	0.00601
698.1	-0.14202	1.45438	0.20454	1.0894	698.1	0.01252	0.00581	0.00559	0.00599
698	-0.33779	1.47598	0.08718	1.27578	698	0.01251	0.00585	0.00559	0.00598
697.9	-0.19931	1.52419	0.13425	1.27194	697.9	0.01251	0.00591	0.00559	0.00601
697.8	-0.5481	1.46201	0.16795	1.33954	697.8	0.01254	0.00589	0.00561	0.00602
697.7	-0.40386	1.41565	0.13174	1.22719	697.7	0.01253	0.00585	0.00559	0.00604
697.6	-0.05424	1.35174	0.23568	1.44251	697.6	0.01259	0.00586	0.00558	0.00605
697.5	0.17491	1.18126	0.32244	1.48533	697.5	0.01257	0.00585	0.00557	0.00604
697.4	0.67404	1.317	0.44077	1.40555	697.4	0.01257	0.00587	0.00558	0.00602
697.3	1.24985	1.17879	0.40505	1.3572	697.3	0.01259	0.00582	0.00558	0.00602
697.2	0.95556	1.23712	0.2952	1.41811	697.2	0.01263	0.00582	0.00558	0.00603
697.1	0.86128	1.07512	0.53593	1.37368	697.1	0.01262	0.00586	0.00557	0.00603
697	0.79579	1.01475	0.60735	1.45367	697	0.01262	0.00584	0.00558	0.00602
696.9	0.83995	0.89852	0.57612	1.44386	696.9	0.01263	0.00587	0.00559	0.00603
696.8	1.16812	1.16578	0.6995	1.79754	696.8	0.01264	0.00589	0.00559	0.00598
696.7	0.90159	1.18734	0.77452	1.76591	696.7	0.01264	0.0059	0.0056	0.00598
696.6	0.92706	1.32666	0.86538	1.66163	696.6	0.01262	0.00591	0.00563	0.00591
696.5	1.41006	1.26693	1.02275	1.97779	696.5	0.01264	0.00589	0.00565	0.00589
696.4	1.92495	1.20377	1.12276	2.20896	696.4	0.01262	0.00588	0.00564	0.00588
696.3	1.97644	1.0322	0.94507	2.17153	696.3	0.01266	0.00589	0.00566	0.00588
696.2	1.74031	0.94499	0.87171	1.9722	696.2	0.01266	0.00586	0.00567	0.00588
696.1	1.7759	0.77069	1.04066	1.90497	696.1	0.01269	0.00588	0.00567	0.00586
696	1.93477	0.80302	0.9848	1.91926	696	0.01268	0.00587	0.00569	0.00588
695.9	1.24287	0.81869	1.15624	2.00368	695.9	0.01268	0.00589	0.00572	0.00591
695.8	1.30088	0.90932	1.41089	1.75292	695.8	0.01272	0.00593	0.00574	0.00592
695.7	1.39786	0.79985	1.35227	1.67485	695.7	0.01273	0.00594	0.00575	0.0059
695.6	1.24438	0.91255	1.49151	1.73319	695.6	0.01274	0.00592	0.00576	0.00588
695.5	1.37743	0.74751	1.10309	1.96534	695.5	0.01273	0.00593	0.00577	0.00587
695.4	1.48251	0.64269	0.88329	1.86391	695.4	0.01278	0.00593	0.0058	0.0059
695.3	1.31175	0.47434	0.76224	1.93593	695.3	0.01277	0.00593	0.00582	0.00587
695.2	0.82853	0.38258	0.61881	1.93495	695.2	0.01279	0.00594	0.00578	0.00589
695.1	0.45125	0.39113	0.6182	2.01843	695.1	0.01282	0.00594	0.0058	0.00592
695	0.61179	0.58591	0.73712	2.22073	695	0.01285	0.00594	0.0058	0.00594
694.9	0.90748	0.70012	0.61484	2.06427	694.9	0.01287	0.00594	0.00574	0.00598
694.8	0.71507	0.749	0.5198	2.07503	694.8	0.0129	0.00595	0.00577	0.00599
694.7	0.98893	0.67534	0.28075	2.0332	694.7	0.01293	0.00593	0.00577	0.00597
694.6	1.04861	0.81917	0.25742	1.95551	694.6	0.01291	0.00594	0.00579	0.00596
694.5	0.48207	0.7439	0.29533	1.81302	694.5	0.01296	0.00596	0.00581	0.00592
694.4	0.19837	0.54724	0.54764	1.78797	694.4	0.01291	0.00598	0.00579	0.00593
694.3	0.51881	0.67223	0.6282	2.07277	694.3	0.01292	0.00598	0.0058	0.00591
694.2	0.75025	0.63201	0.70308	2.23006	694.2	0.01291	0.00598	0.0058	0.00595
694.1	0.33877	0.53053	0.8543	2.18555	694.1	0.01292	0.00604	0.00578	0.00598
694	1.01957	0.48737	0.98185	2.1613	694	0.01292	0.00607	0.00578	0.00603
693.9	1.00909	0.58367	0.78732	2.13963	693.9	0.01295	0.00609	0.00578	0.00603
693.8	1.07176	0.55461	0.67574	2.06835	693.8	0.01295	0.00612	0.00578	0.00603
693.7	0.84414	0.4681	0.56339	1.9154	693.7	0.01297	0.00609	0.0058	0.00606
693.6	1.11363	0.24607	0.54968	1.87501	693.6	0.01298	0.00604	0.00578	0.00608
693.5	1.17815	0.39772	0.43793	1.85716	693.5	0.01304	0.00602	0.00576	0.00608
693.4	0.88805	0.24284	0.58329	2.09572	693.4	0.01307	0.00602	0.00574	0.00612
693.3	0.71205	0.23321	0.72741	1.98984	693.3	0.01309	0.00607	0.00573	0.00608
693.2	0.73587	0.171	0.62896	1.71952	693.2	0.01312	0.00611	0.00572	0.00608
693.1	0.89521	0.38906	0.82435	1.62523	693.1	0.0131	0.00612	0.00574	0.00604
693	0.8189	0.37198	0.9169	1.72067	693	0.01311	0.00615	0.00572	0.00604
692.9	0.69467	0.42049	0.74039	1.63713	692.9	0.01311	0.00613	0.0057	0.00604
692.8	0.98954	0.4	0.58001	1.83809	692.8	0.01312	0.00614	0.00571	0.00605
692.7	0.7049	0.45209	0.42109	1.68072	692.7	0.01313	0.00612	0.00567	0.00603
692.6	0.81654	0.28672	0.29957	1.64744	692.6	0.01315	0.00614	0.00564	0.006
692.5	0.31218	0.30364	0.34932	1.68906	692.5	0.0131	0.00615	0.00564	0.00602
692.4	0.43308	0.28619	0.33188	1.49763	692.4	0.01313	0.0062	0.00566	0.00604
692.3	0.60601	0.46144	0.5374	1.59412	692.3	0.01316	0.0062	0.00566	0.00603
692.2	0.53193	0.3574	0.77211	1.58897	692.2	0.01312	0.00621	0.00566	0.00605
692.1	0.23571	0.2529	0.55292	1.57846	692.1	0.01311	0.00622	0.00565	0.00605
692	1.09653	0.40469	0.78126	1.5101	692	0.01313	0.00624	0.00565	0.00607
691.9	1.51703	0.23221	0.88428	1.47215	691.9	0.01313	0.00626	0.00567	0.00603
691.8	1.09454	0.12567	0.87942	1.5112	691.8	0.01314	0.00627	0.00567	0.00601
691.7	0.84958	0.00616	0.86695	1.27748	691.7	0.01311	0.00627	0.0057	0.00604
691.6	0.87499	0.07749	0.96921	1.10426	691.6	0.01312	0.00624	0.0057	0.00604
691.5	1.32202	0.03552	1.21621	1.1752	691.5	0.01312	0.00622	0.00565	0.00605
691.4	1.37501	0.00614	1.25529	1.25164	691.4	0.01313	0.00621	0.00568	0.00606
691.3	1.16204	0.000620885	1.35241	1.42001	691.3	0.01311	0.0062	0.00568	0.00606
691.2	1.24621	-0.08968	1.0731	1.54684	691.2	0.01311	0.00619	0.00571	0.00606
691.1	1.76124	0.09959	0.85477	1.58879	691.1	0.01313	0.00617	0.00571	0.00603
691	1.88615	0.12841	0.86645	1.4121	691	0.01312	0.00618	0.00573	0.00603
690.9	1.5778	-0.16331	0.73986	1.40406	690.9	0.01318	0.00618	0.00574	0.00602
690.8	2.34189	-0.12182	0.55609	1.42455	690.8	0.01321	0.00618	0.00574	0.00602
690.7	2.23477	-0.22171	0.35611	1.25021	690.7	0.01323	0.00616	0.00578	0.006
690.6	1.95089	-0.03529	0.1435	1.08655	690.6	0.01325	0.00614	0.00578	0.00599
690.5	2.35844	-0.09346	0.21938	1.02275	690.5	0.01329	0.00612	0.00577	0.00598
690.4	2.66384	0.00898	0.33812	1.16188	690.4	0.01326	0.00613	0.00574	0.00598
690.3	2.51857	0.11731	0.51501	1.41916	690.3	0.01325	0.00617	0.00572	0.00594
690.2	2.25789	0.16914	0.57707	1.22549	690.2	0.01325	0.00618	0.00572	0.00595
690.1	1.89686	0.02043	0.56639	1.38264	690.1	0.01326	0.00624	0.00571	0.00592
690	1.74116	0.16177	0.42223	1.18531	690	0.0133	0.00622	0.0057	0.00592
689.9	1.48617	0.04098	-0.00327	1.39224	689.9	0.01332	0.0062	0.00571	0.00593
689.8	1.59636	0.19445	-0.05552	1.62228	689.8	0.01331	0.0062	0.00574	0.00595
689.7	1.88362	0.26071	0.02509	1.68742	689.7	0.0133	0.0062	0.00571	0.00596
689.6	2.17349	0.32919	-0.19214	1.74259	689.6	0.0133	0.00619	0.00573	0.00595
689.5	2.31895	0.43347	0.03671	1.8225	689.5	0.01329	0.00618	0.00573	0.00596
689.4	2.27959	0.531	0.04414	1.56418	689.4	0.01333	0.00621	0.00572	0.00596
689.3	2.97886	0.45639	0.20501	1.49088	689.3	0.01336	0.00626	0.00572	0.00599
689.2	3.23793	0.44724	0.0765	1.21531	689.2	0.01337	0.00621	0.00572	0.00604
689.1	3.50801	0.38521	-0.02965	1.40587	689.1	0.01339	0.00621	0.00572	0.00604
689	3.6171	0.56121	0.06094	1.44072	689	0.0134	0.00618	0.00571	0.00601
688.9	3.39046	0.6682	-0.08636	1.3241	688.9	0.01341	0.00619	0.00571	0.00603
688.8	3.78153	0.57135	-0.06684	1.35032	688.8	0.01343	0.0062	0.0057	0.00602
688.7	3.75196	0.81094	0.03135	1.17943	688.7	0.01343	0.00618	0.00568	0.00605
688.6	3.29848	0.68338	0.1776	1.06958	688.6	0.01344	0.00614	0.00568	0.00605
688.5	3.09552	0.80388	0.21147	1.34293	688.5	0.01342	0.00615	0.00567	0.00605
688.4	3.12754	0.91146	0.09213	1.17988	688.4	0.01343	0.00614	0.00567	0.00603
688.3	3.56001	0.92619	0.05663	1.13372	688.3	0.01346	0.00615	0.00565	0.00603
688.2	3.36027	0.65177	-0.14814	1.20033	688.2	0.01347	0.00618	0.00569	0.00602
688.1	3.02933	0.76258	-0.30421	1.02959	688.1	0.01348	0.00621	0.00569	0.00603
688	2.42937	0.89123	-0.51976	0.98796	688	0.01352	0.00623	0.00568	0.00603
687.9	2.40521	0.99046	-0.48653	0.97042	687.9	0.01355	0.00627	0.00569	0.00604
687.8	2.75663	1.00888	-0.39176	0.87783	687.8	0.01359	0.0063	0.0057	0.00606
687.7	2.72676	0.98906	-0.13149	1.00341	687.7	0.01359	0.00629	0.00567	0.00609
687.6	2.10234	1.1489	-0.24305	0.61301	687.6	0.01362	0.00633	0.00569	0.00611
687.5	2.50688	1.29825	-0.13914	0.53068	687.5	0.01365	0.00633	0.00566	0.00615
687.4	1.75315	1.50049	-0.37923	0.60143	687.4	0.01366	0.00632	0.00567	0.00615
687.3	1.3321	1.44448	-0.44567	0.62814	687.3	0.01364	0.00631	0.00564	0.00617
687.2	1.3122	1.32774	-0.40888	0.5793	687.2	0.01361	0.00631	0.00564	0.00617
687.1	1.38045	1.31296	-0.20276	0.55136	687.1	0.01362	0.0063	0.00564	0.00616
687	1.21001	1.35721	-0.30655	0.57072	687	0.01362	0.00633	0.00567	0.00618
686.9	1.26269	1.36938	-0.19861	0.42555	686.9	0.01365	0.00634	0.00567	0.00623
686.8	1.14065	1.32012	-0.2245	0.29974	686.8	0.01369	0.00634	0.0057	0.00625
686.7	1.27101	1.47546	-0.33459	0.37954	686.7	0.01367	0.00636	0.00576	0.00627
686.6	1.31007	1.40931	-0.28237	0.24987	686.6	0.01367	0.00632	0.00579	0.00629
686.5	1.75429	1.56935	-0.40413	0.36019	686.5	0.01367	0.00631	0.00581	0.0063
686.4	1.80926	1.83129	-0.20144	0.26704	686.4	0.01365	0.00631	0.00583	0.0063
686.3	1.38445	1.79136	-0.22227	0.12408	686.3	0.01369	0.00634	0.00581	0.00629
686.2	1.55941	1.85073	-0.19591	0.26974	686.2	0.01373	0.00634	0.0058	0.00632
686.1	1.22887	1.76853	-0.48822	0.592	686.1	0.01379	0.00635	0.00585	0.00634
686	1.09392	1.68402	-0.2365	0.51224	686	0.0138	0.00634	0.00586	0.00638
685.9	0.45647	1.61527	-0.09191	0.69672	685.9	0.01383	0.00636	0.00591	0.0064
685.8	0.39755	1.59023	-0.01449	0.79511	685.8	0.01383	0.00634	0.00592	0.00637
685.7	0.000456367	1.59809	0.11336	0.75166	685.7	0.01382	0.00638	0.00595	0.00632
685.6	0.64221	1.91722	0.2576	0.80703	685.6	0.01385	0.00641	0.00595	0.00632
685.5	1.09091	1.72443	0.10539	0.92983	685.5	0.01387	0.00645	0.00594	0.00633
685.4	1.21418	1.66548	0.16329	0.99856	685.4	0.01387	0.00641	0.00596	0.00634
685.3	0.95058	1.67785	0.04929	1.0268	685.3	0.01388	0.0064	0.00598	0.00634
685.2	1.26781	1.91138	-0.25214	0.94609	685.2	0.0139	0.00643	0.006	0.00637
685.1	0.77194	2.01303	-0.41912	0.86258	685.1	0.01393	0.00643	0.00601	0.00643
685	1.37118	2.02393	-0.34398	0.88709	685	0.01392	0.00643	0.00597	0.00645
684.9	1.34568	1.83409	-0.23093	0.90335	684.9	0.01393	0.00643	0.00597	0.00643
684.8	1.49795	1.95903	-0.12566	1.08234	684.8	0.01397	0.00641	0.00596	0.00641
684.7	0.74235	1.88895	-0.06747	1.30268	684.7	0.01398	0.00637	0.00595	0.00642
684.6	0.87736	1.919	-0.15157	1.3592	684.6	0.01401	0.00636	0.00597	0.00637
684.5	0.83175	1.69053	-0.02491	1.48357	684.5	0.014	0.00633	0.00597	0.00639
684.4	0.65736	1.78506	-0.20632	1.5471	684.4	0.01402	0.00631	0.00596	0.00643
684.3	0.86622	1.75277	-0.30422	1.63686	684.3	0.014	0.00631	0.00599	0.0064
684.2	1.1515	1.74206	-0.34924	1.69176	684.2	0.014	0.00628	0.00601	0.00644
684.1	0.48764	1.82346	-0.04093	1.86975	684.1	0.014	0.00631	0.006	0.00645
684	0.93626	1.72407	-0.07379	1.75573	684	0.01398	0.00635	0.00604	0.00645
683.9	1.25714	1.7761	0.15507	1.91286	683.9	0.01399	0.00633	0.00605	0.00644
683.8	0.37402	1.89804	0.0564	2.23901	683.8	0.01405	0.00636	0.00604	0.00645
683.7	0.90088	1.80995	0.05108	2.34433	683.7	0.01406	0.00636	0.00606	0.00647
683.6	0.68473	1.67893	0.09557	2.14495	683.6	0.01409	0.00636	0.006	0.00646
683.5	0.44318	1.62945	0.08606	2.10271	683.5	0.0141	0.00637	0.00605	0.00644
683.4	0.36655	1.86121	0.07325	2.20174	683.4	0.0141	0.00634	0.00606	0.00642
683.3	0.52695	1.74629	-0.04808	2.20809	683.3	0.01411	0.00632	0.006	0.00644
683.2	0.341	1.49333	-0.15423	2.21004	683.2	0.0141	0.00635	0.006	0.00642
683.1	0.31622	1.30017	0.05394	1.98273	683.1	0.0141	0.00635	0.006	0.00644
683	1.01141	1.29043	0.19106	1.87513	683	0.01414	0.00634	0.00605	0.00645
682.9	0.8532	1.17663	0.09939	1.86793	682.9	0.01412	0.0063	0.00606	0.00649
682.8	1.06116	1.02775	-0.00636	1.79462	682.8	0.01412	0.00629	0.00612	0.0065
682.7	1.03014	0.82201	0.22112	1.80837	682.7	0.0141	0.00629	0.00608	0.00651
682.6	1.35598	0.75084	0.17393	1.8793	682.6	0.01414	0.00628	0.00611	0.0065
682.5	1.54493	0.69932	-0.14549	1.88555	682.5	0.01417	0.00626	0.00608	0.00649
682.4	0.86404	0.78875	-0.34117	1.84393	682.4	0.01419	0.00623	0.00605	0.0065
682.3	1.34214	0.70181	-0.30847	1.95079	682.3	0.01421	0.00621	0.00604	0.00651
682.2	0.00353	0.49928	-0.18068	1.71631	682.2	0.01421	0.0062	0.00609	0.00653
682.1	-0.16301	0.71238	-0.4387	1.74765	682.1	0.0142	0.00622	0.00611	0.00651
682	-0.01671	0.46704	-0.23347	1.59367	682	0.01418	0.00625	0.0061	0.00647
681.9	0.34367	0.44794	0.07563	1.7652	681.9	0.01417	0.00626	0.00611	0.00643
681.8	0.62233	0.29039	0.29677	1.69241	681.8	0.01417	0.00626	0.00615	0.00637
681.7	0.44504	0.31673	0.1399	1.53116	681.7	0.01418	0.00626	0.0062	0.00635
681.6	0.4106	0.26573	0.04979	1.56628	681.6	0.0142	0.00626	0.00621	0.00633
681.5	0.26758	0.36013	0.21713	1.62016	681.5	0.01418	0.00629	0.00622	0.00637
681.4	0.8815	0.41846	0.1522	1.66143	681.4	0.01416	0.0063	0.00619	0.00639
681.3	1.04596	0.36214	0.5157	1.53616	681.3	0.01414	0.00633	0.00624	0.00642
681.2	1.38858	0.33486	0.57777	1.35035	681.2	0.01414	0.00632	0.00624	0.0064
681.1	1.62978	0.43246	0.52916	1.22015	681.1	0.01417	0.00633	0.00626	0.00641
681	1.74192	0.39217	0.50037	1.07755	681	0.0142	0.00634	0.00624	0.00642
680.9	1.2928	0.18361	0.57246	1.3355	680.9	0.01424	0.00636	0.00624	0.00637
680.8	1.32873	0.10171	0.48873	1.33172	680.8	0.01426	0.00634	0.00626	0.00637
680.7	0.44132	0.33605	0.44409	1.42174	680.7	0.0143	0.00633	0.00624	0.00635
680.6	0.50452	0.31305	0.53516	1.25657	680.6	0.01432	0.00631	0.00622	0.00636
680.5	0.46462	-0.00198	0.70745	0.89644	680.5	0.01432	0.00632	0.0062	0.00635
680.4	0.53759	-0.03023	0.72981	0.78952	680.4	0.01432	0.00633	0.00622	0.00636
680.3	0.41002	0.22893	0.70165	0.94371	680.3	0.01433	0.00633	0.00622	0.00638
680.2	0.62292	0.30761	0.64838	1.01197	680.2	0.01433	0.00632	0.0062	0.00637
680.1	0.7371	0.22354	0.46122	1.10614	680.1	0.01432	0.00637	0.00627	0.00637
680	0.9571	0.28982	0.63935	1.2267	680	0.01434	0.00637	0.00628	0.00639
679.9	0.13198	0.4827	0.79776	1.44287	679.9	0.01438	0.00638	0.00632	0.00638
679.8	-0.20612	0.52701	0.91491	1.38066	679.8	0.01439	0.0064	0.0063	0.00639
679.7	-0.251	0.60142	1.11761	1.27075	679.7	0.01442	0.00643	0.00628	0.00636
679.6	-0.49342	0.50741	1.05845	1.2251	679.6	0.01441	0.00643	0.00628	0.00636
679.5	-0.74251	0.70836	0.85596	1.25024	679.5	0.01446	0.00646	0.00628	0.00638
679.4	-0.76097	0.64782	0.71227	1.26176	679.4	0.01444	0.00649	0.00629	0.00634
679.3	-1.21054	0.83298	0.82243	1.28867	679.3	0.01443	0.00649	0.00632	0.00638
679.2	-0.95061	0.66823	0.96958	1.31431	679.2	0.01443	0.00653	0.00631	0.00638
679.1	-1.43869	0.53159	0.88191	1.22116	679.1	0.01443	0.00654	0.00634	0.00638
679	-0.51875	0.46516	0.99467	1.44511	679	0.01445	0.00656	0.00632	0.00639
678.9	-0.46896	0.34063	0.93967	1.72596	678.9	0.01444	0.00655	0.00633	0.00643
678.8	-0.14554	0.63596	0.6193	1.71519	678.8	0.01445	0.00656	0.00631	0.00644
678.7	-0.7011	0.26566	0.52393	1.62879	678.7	0.01448	0.00653	0.00632	0.00647
678.6	-1.14402	0.23296	0.54163	1.81283	678.6	0.01452	0.00653	0.00633	0.00652
678.5	-0.89175	0.19787	0.66117	1.64079	678.5	0.01454	0.00652	0.00632	0.00656
678.4	-0.84888	0.19157	0.7873	1.69397	678.4	0.01456	0.00652	0.00633	0.00657
678.3	-0.72515	-0.04777	0.56033	1.72858	678.3	0.01459	0.00651	0.00634	0.00657
678.2	-1.02506	-0.12716	0.39233	1.49717	678.2	0.0146	0.00655	0.00636	0.00654
678.1	-1.29679	0.18925	0.51107	1.64773	678.1	0.01464	0.00655	0.00639	0.00655
678	-1.71859	0.18557	0.44354	1.81192	678	0.01467	0.00656	0.00639	0.00654
677.9	-1.39507	0.23128	0.5613	1.74915	677.9	0.01466	0.00655	0.0064	0.00654
677.8	-1.87017	0.12477	0.56711	1.55478	677.8	0.01463	0.00658	0.00642	0.00655
677.7	-1.14878	0.13183	0.43674	1.69039	677.7	0.01465	0.00658	0.00642	0.00657
677.6	-0.96973	-0.03692	0.24334	1.74888	677.6	0.01465	0.0066	0.00643	0.00658
677.5	-0.56556	-0.02283	0.32911	1.75104	677.5	0.01465	0.00664	0.00642	0.00661
677.4	-0.56226	0.2357	0.27208	1.76597	677.4	0.01466	0.00664	0.00642	0.00662
677.3	-0.21875	0.22189	0.17868	2.09347	677.3	0.01471	0.00667	0.00643	0.00659
677.2	-0.1661	0.34891	0.09509	1.97581	677.2	0.01469	0.00666	0.00642	0.00659
677.1	0.18069	0.25875	0.09929	1.98199	677.1	0.0147	0.00668	0.00644	0.00662
677	0.3415	0.14883	0.11882	1.86875	677	0.01472	0.00666	0.00641	0.00662
676.9	0.68017	0.34735	0.17669	1.82519	676.9	0.01471	0.00666	0.00638	0.00665
676.8	0.26562	0.24178	0.16414	1.66744	676.8	0.01475	0.00664	0.00637	0.00664
676.7	0.39637	0.24769	0.16651	1.62214	676.7	0.01475	0.00662	0.00635	0.00668
676.6	0.82059	0.17063	0.04433	1.82483	676.6	0.01478	0.00661	0.00638	0.00667
676.5	0.40996	0.23929	0.28548	1.74958	676.5	0.01479	0.0066	0.00635	0.00666
676.4	0.51295	0.24657	0.29379	1.70569	676.4	0.01479	0.00662	0.00634	0.00664
676.3	0.56294	0.31116	0.4417	1.39993	676.3	0.01479	0.00661	0.00637	0.00664
676.2	1.18622	0.10608	0.65755	1.44451	676.2	0.01479	0.00662	0.00632	0.00667
676.1	1.18183	0.11822	0.54787	1.43794	676.1	0.01477	0.00663	0.00631	0.00666
676	1.29542	0.19714	0.63876	1.36783	676	0.01477	0.0066	0.00631	0.00666
675.9	1.32413	0.12879	0.47774	1.24271	675.9	0.01479	0.0066	0.00626	0.00664
675.8	1.04268	0.11315	0.74004	0.94264	675.8	0.01484	0.0066	0.00627	0.00663
675.7	0.68639	0.00618	0.74838	0.70905	675.7	0.01487	0.00657	0.00629	0.00663
675.6	0.32736	0.13583	0.80445	0.79824	675.6	0.01489	0.00661	0.00631	0.00665
675.5	0.74405	0.48624	0.54478	0.75304	675.5	0.01489	0.00663	0.0063	0.00663
675.4	0.76483	0.51523	0.49533	0.99591	675.4	0.01489	0.00666	0.00632	0.00663
675.3	0.5018	0.6399	0.2925	0.86651	675.3	0.01487	0.00671	0.00631	0.00662
675.2	0.11655	0.83557	0.49649	0.75465	675.2	0.01487	0.00672	0.00631	0.00665
675.1	0.21677	0.9154	0.26583	0.81842	675.1	0.01489	0.00672	0.00631	0.00664
675	0.67809	0.98433	0.34593	0.77121	675	0.01487	0.00671	0.00634	0.00665
674.9	0.50293	1.02763	0.48036	0.76709	674.9	0.01487	0.00673	0.00639	0.0066
674.8	0.23618	0.8893	0.35864	0.78143	674.8	0.01492	0.00672	0.00635	0.00662
674.7	-0.10591	0.94339	0.59389	0.49348	674.7	0.015	0.00672	0.00637	0.00665
674.6	-0.14573	0.88056	0.76747	0.32965	674.6	0.01501	0.00672	0.00634	0.00664
674.5	-0.08983	0.84626	0.87287	0.08993	674.5	0.01502	0.00668	0.00634	0.00665
674.4	-0.74488	0.83966	1.12671	-0.22028	674.4	0.01502	0.00667	0.00636	0.00666
674.3	-0.80354	0.79215	1.0638	-0.39542	674.3	0.01503	0.00667	0.0064	0.00669
674.2	-0.13859	0.74429	0.90121	-0.41386	674.2	0.01504	0.0067	0.0064	0.00673
674.1	-0.20399	0.72541	1.157	-0.61848	674.1	0.01507	0.00669	0.00642	0.00676
674	-0.66854	0.84817	1.27512	-0.60361	674	0.01507	0.00671	0.00641	0.00678
673.9	-0.36366	0.86781	1.21701	-0.63516	673.9	0.01509	0.00673	0.00643	0.00679
673.8	-0.84002	0.7845	1.39951	-0.64908	673.8	0.01509	0.00674	0.00646	0.00676
673.7	-0.778	0.65701	1.40479	-0.61786	673.7	0.01509	0.00676	0.0065	0.00677
673.6	-0.73848	0.57594	1.22716	-0.2786	673.6	0.01511	0.00678	0.00648	0.00676
673.5	-0.22952	0.45719	1.33684	-0.42282	673.5	0.01512	0.00681	0.0065	0.00678
673.4	-0.07223	0.35728	1.15155	-0.78045	673.4	0.01514	0.00683	0.00646	0.00681
673.3	-0.0927	0.46151	1.29123	-0.79201	673.3	0.01514	0.00683	0.00647	0.00683
673.2	0.35398	0.56127	1.1097	-0.67318	673.2	0.01516	0.00685	0.00645	0.00684
673.1	0.19627	0.51253	0.74739	-0.55759	673.1	0.01519	0.00688	0.00646	0.00685
673	0.77691	0.75032	0.8503	-0.55912	673	0.01522	0.00685	0.00649	0.00688
672.9	0.60988	0.85637	0.82451	-0.43137	672.9	0.01525	0.00687	0.00657	0.00691
672.8	0.61082	0.75215	0.67048	-0.60481	672.8	0.01525	0.00688	0.0066	0.00694
672.7	0.83096	1.30056	0.62457	-0.53831	672.7	0.01526	0.00688	0.0066	0.00696
672.6	0.82824	1.18534	0.54197	-0.35686	672.6	0.01527	0.0069	0.00663	0.007
672.5	1.61957	1.23307	0.47387	-0.0411	672.5	0.01529	0.00693	0.00663	0.00698
672.4	2.07901	1.02192	0.6425	-0.07256	672.4	0.01531	0.00692	0.00662	0.00699
672.3	1.77891	0.95473	0.46745	-0.11305	672.3	0.01536	0.00693	0.00663	0.00696
672.2	1.82481	0.85284	0.3349	-0.03488	672.2	0.01539	0.00692	0.00664	0.00697
672.1	2.04238	0.81994	0.27859	-0.07324	672.1	0.0154	0.00694	0.00663	0.00699
672	2.1174	0.94023	0.18369	0.08651	672	0.01545	0.00697	0.00663	0.00698
671.9	1.23969	0.95042	0.20325	-0.0188	671.9	0.01547	0.00698	0.0066	0.00701
671.8	1.38203	1.04853	-0.06029	0.10984	671.8	0.0155	0.00698	0.00658	0.00705
671.7	0.91232	1.43818	-0.10636	-0.08567	671.7	0.01549	0.00696	0.00661	0.00708
671.6	1.27606	1.22467	-0.33254	0.07089	671.6	0.01551	0.00693	0.00662	0.00707
671.5	1.39607	1.40692	-0.43574	0.34515	671.5	0.01552	0.00693	0.00662	0.00709
671.4	1.24639	1.47809	-0.4236	0.57717	671.4	0.01553	0.00695	0.00663	0.00711
671.3	0.62048	1.6022	-0.56159	0.64075	671.3	0.01553	0.00696	0.00665	0.00712
671.2	1.01384	1.43477	-0.724	0.8817	671.2	0.01555	0.00698	0.00666	0.00715
671.1	0.76701	1.4206	-0.87001	0.98144	671.1	0.01556	0.00696	0.00666	0.00713
671	0.16439	1.54301	-0.8262	1.04103	671	0.01556	0.00695	0.00667	0.00709
670.9	-0.34325	1.44312	-0.92658	1.21713	670.9	0.0156	0.00697	0.00668	0.0071
670.8	-0.11289	1.45007	-0.80082	1.03263	670.8	0.01561	0.00697	0.00668	0.0071
670.7	-0.84681	1.48145	-0.54936	1.193	670.7	0.01561	0.00699	0.00668	0.00707
670.6	-1.26971	1.47242	-0.67076	1.20575	670.6	0.01562	0.007	0.00668	0.00711
670.5	-1.22759	1.44705	-0.8462	1.10351	670.5	0.01566	0.00699	0.00664	0.00709
670.4	-1.38076	1.54583	-0.84154	1.13954	670.4	0.01567	0.007	0.00667	0.00711
670.3	-2.15403	1.49265	-0.93442	1.16528	670.3	0.01568	0.00698	0.00666	0.00712
670.2	-2.40686	1.50534	-1.03657	1.44698	670.2	0.01571	0.00698	0.00674	0.00708
670.1	-2.55994	1.54457	-0.98894	1.55008	670.1	0.01575	0.007	0.00674	0.00709
670	-2.42462	1.35433	-1.15965	1.81367	670	0.01575	0.00699	0.00673	0.00708
669.9	-2.39256	1.69258	-0.837	1.93271	669.9	0.01575	0.00702	0.00675	0.00711
669.8	-2.71361	1.5852	-0.94844	1.78217	669.8	0.01576	0.00704	0.00677	0.00709
669.7	-2.24895	1.66455	-0.99168	1.97745	669.7	0.01578	0.00704	0.00674	0.00707
669.6	-2.26965	1.70169	-1.01075	2.23395	669.6	0.0158	0.00704	0.00675	0.00707
669.5	-1.96657	1.59587	-1.00214	2.54273	669.5	0.01582	0.00706	0.00675	0.00708
669.4	-1.94341	1.5148	-1.02472	2.58757	669.4	0.01586	0.00706	0.00676	0.00707
669.3	-2.33132	1.67835	-0.7227	2.45045	669.3	0.0159	0.00703	0.00675	0.00708
669.2	-2.28719	1.60309	-0.84245	2.55704	669.2	0.01592	0.00705	0.00673	0.0071
669.1	-2.09398	1.49198	-0.81622	2.62422	669.1	0.01587	0.00704	0.00674	0.00712
669	-2.0883	1.46272	-0.83054	2.60229	669	0.01587	0.00707	0.00673	0.00714
668.9	-2.66215	1.61823	-0.60518	2.91559	668.9	0.01589	0.00703	0.00676	0.00713
668.8	-2.68633	1.62266	-0.39579	2.83785	668.8	0.01592	0.00703	0.00678	0.00715
668.7	-2.33896	1.38185	-0.34373	2.67672	668.7	0.01594	0.00703	0.00681	0.00714
668.6	-1.85795	1.21632	-0.32232	2.58452	668.6	0.01594	0.00703	0.00683	0.00717
668.5	-1.77646	0.95426	-0.11766	2.67587	668.5	0.01595	0.00704	0.00681	0.00721
668.4	-1.60849	0.99657	-0.1138	2.69393	668.4	0.01597	0.00705	0.00682	0.00718
668.3	-1.63417	1.02779	-0.07914	2.76208	668.3	0.01597	0.00709	0.00681	0.00718
668.2	-1.88227	0.9921	-0.18214	2.81124	668.2	0.016	0.00709	0.00683	0.00718
668.1	-1.57564	0.9288	-0.01941	2.52004	668.1	0.016	0.00709	0.00686	0.00717
668	-1.51398	1.00882	0.14646	2.6702	668	0.01602	0.00711	0.00686	0.00714
667.9	-0.93643	1.05353	0.3673	2.62131	667.9	0.01608	0.00713	0.00687	0.00711
667.8	-0.34423	1.38943	0.45318	2.6542	667.8	0.0161	0.00711	0.00689	0.0071
667.7	-0.48919	1.28973	0.29652	2.57245	667.7	0.01613	0.00714	0.00688	0.00713
667.6	-0.29595	1.49789	0.23414	2.29543	667.6	0.01614	0.00713	0.00689	0.00713
667.5	0.05627	1.46413	0.28814	2.33201	667.5	0.01613	0.00715	0.00688	0.00711
667.4	0.30203	1.43093	0.12182	2.28689	667.4	0.01615	0.00715	0.00688	0.00712
667.3	0.84649	1.26399	0.00468	2.11509	667.3	0.01619	0.00718	0.00688	0.00713
667.2	1.45957	1.50388	-0.03585	2.21074	667.2	0.01623	0.00721	0.00688	0.00715
667.1	1.51701	1.5826	-0.02269	2.07552	667.1	0.01624	0.00722	0.00689	0.00714
667	2.52906	1.74346	0.0533	2.13854	667	0.01627	0.00723	0.00688	0.00713
666.9	2.94812	1.67337	0.24944	2.11941	666.9	0.01627	0.00727	0.00688	0.00721
666.8	2.09877	1.51534	0.07788	2.09354	666.8	0.01629	0.00726	0.00686	0.00727
666.7	2.62934	1.55324	0.26683	1.70277	666.7	0.01627	0.00728	0.00686	0.00728
666.6	2.74924	1.45823	0.64513	1.3119	666.6	0.01631	0.0073	0.00688	0.00731
666.5	2.13527	1.18929	0.74431	1.16898	666.5	0.01635	0.00729	0.00688	0.0073
666.4	2.22798	1.10046	1.0175	1.30448	666.4	0.01635	0.00728	0.0069	0.00732
666.3	1.86259	1.11561	0.86431	1.29197	666.3	0.01636	0.0073	0.00689	0.00732
666.2	1.96054	1.35356	0.81291	1.00508	666.2	0.01638	0.0073	0.0069	0.0073
666.1	2.05064	1.3128	0.75062	0.84108	666.1	0.01643	0.00732	0.00693	0.0073
666	2.34116	1.27957	0.96669	0.95726	666	0.01644	0.00732	0.00692	0.00736
665.9	2.54991	1.18457	1.07512	0.9026	665.9	0.01644	0.00732	0.00689	0.00735
665.8	2.06929	1.13432	1.12647	0.82312	665.8	0.01646	0.00733	0.00689	0.00735
665.7	1.7344	1.12356	1.34008	0.71962	665.7	0.01649	0.00733	0.0069	0.00736
665.6	1.24481	1.06195	1.45321	0.91867	665.6	0.01651	0.00734	0.00692	0.00732
665.5	1.41068	0.97484	1.51445	0.84666	665.5	0.01653	0.00737	0.00691	0.00735
665.4	1.81485	1.14742	1.49552	0.84671	665.4	0.01655	0.00739	0.0069	0.00734
665.3	1.88984	1.2085	1.4761	0.98915	665.3	0.01658	0.00738	0.00688	0.00737
665.2	1.71454	1.44083	1.56214	0.97311	665.2	0.0166	0.00739	0.00688	0.00737
665.1	1.5318	1.32822	1.52599	1.10441	665.1	0.01661	0.00739	0.00691	0.00736
665	1.74644	1.08311	1.55411	1.15877	665	0.01661	0.00737	0.00689	0.00736
664.9	1.67014	1.1527	1.55725	1.13522	664.9	0.01667	0.00739	0.00691	0.00737
664.8	1.71808	1.1478	1.49886	1.10003	664.8	0.01668	0.0074	0.00692	0.00736
664.7	1.4614	1.23202	1.23638	0.89172	664.7	0.01667	0.00739	0.00693	0.00739
664.6	2.32454	1.36005	1.24581	0.68284	664.6	0.01671	0.0074	0.00691	0.00741
664.5	2.18862	1.13217	1.33957	0.75767	664.5	0.01668	0.0074	0.00688	0.00741
664.4	1.65691	1.12869	1.42154	0.80614	664.4	0.01666	0.00741	0.0069	0.00744
664.3	1.68936	0.92829	1.57671	0.89138	664.3	0.01669	0.00739	0.00691	0.00744
664.2	1.7987	0.76929	1.66696	1.09112	664.2	0.01667	0.00741	0.00694	0.00742
664.1	1.67797	0.70967	1.71144	1.11061	664.1	0.01669	0.00739	0.00699	0.00745
664	1.43498	0.92209	1.52554	1.24201	664	0.01674	0.00737	0.00704	0.00749
663.9	1.49617	0.90115	1.55099	1.259	663.9	0.01678	0.00737	0.00705	0.00744
663.8	1.63054	0.79684	1.50444	1.40582	663.8	0.01676	0.00738	0.0071	0.00748
663.7	1.60306	0.63085	1.70433	1.37755	663.7	0.01677	0.00736	0.00704	0.00748
663.6	1.43204	0.77775	1.70042	1.12501	663.6	0.0168	0.00737	0.00707	0.00748
663.5	1.44091	0.76524	1.91028	1.19719	663.5	0.01679	0.00735	0.00706	0.00748
663.4	1.61655	0.86636	2.29998	0.99929	663.4	0.0168	0.00735	0.00708	0.00745
663.3	1.59497	0.7036	2.13768	1.13626	663.3	0.01685	0.00734	0.00708	0.00745
663.2	1.41514	0.78106	2.06295	1.31732	663.2	0.01688	0.00734	0.00709	0.00744
663.1	1.61701	0.83108	2.11023	1.40496	663.1	0.01688	0.00736	0.0071	0.0074
663	2.00963	0.96471	2.06244	1.25859	663	0.01694	0.00738	0.00708	0.00741
662.9	1.89551	0.89117	2.04642	1.24663	662.9	0.01696	0.00735	0.00707	0.00747
662.8	1.94341	0.92921	2.16363	1.06889	662.8	0.01696	0.00738	0.00705	0.00748
662.7	1.27104	0.88756	2.34722	1.11458	662.7	0.017	0.00737	0.00702	0.00748
662.6	1.50037	0.9451	2.09126	1.06652	662.6	0.01701	0.00742	0.00702	0.00746
662.5	1.35068	0.98422	1.8812	0.78014	662.5	0.01698	0.00743	0.00707	0.00744
662.4	1.19991	0.92498	1.93806	0.71192	662.4	0.017	0.00747	0.00705	0.00748
662.3	1.2672	1.17244	1.78299	0.54454	662.3	0.01705	0.0075	0.00706	0.00747
662.2	1.77369	1.27126	1.3508	0.42821	662.2	0.01707	0.0075	0.00707	0.00754
662.1	1.8168	1.18375	1.49555	0.44532	662.1	0.01709	0.00749	0.00708	0.00751
662	1.37507	0.99702	1.32964	0.5925	662	0.01709	0.00751	0.0071	0.00754
661.9	1.3025	0.99852	1.47801	0.48487	661.9	0.01713	0.00751	0.00711	0.00753
661.8	1.71469	0.85428	1.45647	0.6321	661.8	0.01715	0.00751	0.0071	0.00751
661.7	1.90847	0.84382	1.30557	0.57286	661.7	0.01717	0.00756	0.00709	0.0075
661.6	1.80216	0.88406	1.29748	0.40822	661.6	0.01718	0.0076	0.00708	0.00754
661.5	2.66706	0.74376	1.43937	0.24488	661.5	0.0172	0.0076	0.00708	0.00756
661.4	2.84395	0.75203	1.65255	0.14563	661.4	0.01726	0.00764	0.00708	0.00757
661.3	2.33721	0.60633	1.9406	0.19287	661.3	0.01728	0.00769	0.00711	0.00757
661.2	1.74184	0.56611	1.84368	0.27998	661.2	0.01732	0.0077	0.00711	0.00759
661.1	1.3387	0.75459	1.40363	0.42765	661.1	0.01733	0.00771	0.00712	0.00762
661	1.62323	0.54494	1.47034	0.50545	661	0.01738	0.00773	0.00712	0.00762
660.9	1.33609	0.68018	1.61429	0.54996	660.9	0.0174	0.00775	0.00713	0.00763
660.8	1.47383	0.65296	1.35064	0.48609	660.8	0.01743	0.00773	0.0071	0.00765
660.7	1.25471	0.51953	1.70704	0.4804	660.7	0.01744	0.00775	0.00709	0.00765
660.6	0.94116	0.57	1.72763	0.17591	660.6	0.01744	0.00778	0.0071	0.00767
660.5	1.25868	0.58078	1.65609	0.17996	660.5	0.01744	0.0078	0.00708	0.00767
660.4	1.1238	0.74117	1.78032	0.34069	660.4	0.01747	0.00781	0.00708	0.00765
660.3	0.71903	0.76495	1.77937	0.56212	660.3	0.0175	0.0078	0.00714	0.00767
660.2	0.7178	0.51907	1.59179	0.43882	660.2	0.01753	0.0078	0.00713	0.00772
660.1	0.65823	0.67536	1.47826	0.495	660.1	0.01756	0.00782	0.00715	0.00772
660	1.06303	0.69092	1.37712	0.52169	660	0.01761	0.00783	0.00718	0.00774
659.9	1.27044	0.84994	1.31838	0.50639	659.9	0.01762	0.00784	0.0072	0.00775
659.8	1.7496	1.05402	1.32909	0.53695	659.8	0.01764	0.00785	0.00721	0.00779
659.7	1.31876	0.78924	0.83997	0.39373	659.7	0.01767	0.00783	0.00723	0.00781
659.6	1.34847	0.89695	0.86282	0.44467	659.6	0.01766	0.00785	0.00723	0.00776
659.5	0.98603	0.92875	0.59733	0.41425	659.5	0.0177	0.00786	0.00728	0.00779
659.4	1.81835	0.93209	0.66075	0.37026	659.4	0.01769	0.00789	0.00728	0.00783
659.3	1.21588	1.03033	0.89803	0.25801	659.3	0.01772	0.00787	0.00728	0.00784
659.2	0.74852	1.08767	1.03293	0.11033	659.2	0.01778	0.00787	0.00731	0.00784
659.1	1.16459	1.17146	1.07735	0.24903	659.1	0.01778	0.00785	0.00735	0.00788
659	1.42163	1.06848	1.22924	0.46129	659	0.0178	0.00786	0.00735	0.00786
658.9	1.40994	1.05256	1.36692	0.39657	658.9	0.01782	0.00787	0.00734	0.00785
658.8	0.78962	0.93698	1.32578	0.59062	658.8	0.01779	0.00788	0.00734	0.00786
658.7	1.17184	0.78729	1.35165	0.63243	658.7	0.01779	0.00789	0.00733	0.00785
658.6	1.13289	0.79166	1.42878	0.73635	658.6	0.0178	0.00789	0.00735	0.00787
658.5	0.42949	0.78411	1.33111	0.80942	658.5	0.01782	0.0079	0.00737	0.0079
658.4	-0.2244	0.89696	1.37045	0.77238	658.4	0.01784	0.00788	0.00739	0.00791
658.3	0.07308	0.78362	1.59611	0.89068	658.3	0.01785	0.00785	0.00742	0.00789
658.2	0.20501	0.97792	1.47353	0.9451	658.2	0.01791	0.00785	0.00743	0.0079
658.1	0.22063	1.08676	1.29975	1.19022	658.1	0.0179	0.00783	0.0074	0.00793
658	0.72826	1.21598	1.02793	1.43969	658	0.01792	0.0078	0.00741	0.00793
657.9	1.20421	1.1786	0.98472	1.3871	657.9	0.01792	0.0078	0.00743	0.00794
657.8	1.09464	0.94133	1.09552	1.28038	657.8	0.01795	0.00779	0.00745	0.00796
657.7	0.70007	1.19024	1.16454	1.29566	657.7	0.01798	0.00781	0.00745	0.00797
657.6	0.62629	0.95063	1.12193	1.25636	657.6	0.01801	0.00783	0.00743	0.00794
657.5	0.65745	0.95524	0.88846	1.33392	657.5	0.01802	0.00785	0.00744	0.00796
657.4	0.34713	0.86526	0.80919	1.47638	657.4	0.01807	0.00785	0.00744	0.00799
657.3	0.3742	0.94821	0.99508	1.53053	657.3	0.01813	0.00786	0.00742	0.00801
657.2	0.28251	1.11366	0.706	1.66796	657.2	0.01815	0.00785	0.00743	0.008
657.1	0.40088	0.91152	0.81202	1.57736	657.1	0.01817	0.00785	0.00744	0.00804
657	0.69708	0.71526	0.83884	1.30625	657	0.0182	0.00789	0.00746	0.00804
656.9	0.03347	0.74987	0.69926	1.4892	656.9	0.0182	0.00789	0.00747	0.00801
656.8	-0.3253	0.86904	0.70665	1.63153	656.8	0.01819	0.00788	0.00747	0.00801
656.7	-0.39336	0.72774	0.30102	1.58318	656.7	0.0182	0.00791	0.00748	0.00804
656.6	-0.28234	0.43351	0.43023	1.82237	656.6	0.01821	0.0079	0.00749	0.00808
656.5	-0.58417	0.50855	0.66073	1.44263	656.5	0.01822	0.0079	0.00753	0.00807
656.4	-0.33853	0.6442	1.06562	1.55653	656.4	0.01821	0.00791	0.00753	0.00808
656.3	-0.37946	0.49542	1.39844	1.39006	656.3	0.01826	0.00789	0.00753	0.00809
656.2	-0.40646	0.55346	1.51013	1.45106	656.2	0.01829	0.00787	0.00756	0.00807
656.1	-0.65162	0.20273	1.30826	1.49018	656.1	0.01831	0.00791	0.00759	0.00809
656	0.25449	0.02296	1.27486	1.73646	656	0.01833	0.00791	0.00761	0.00814
655.9	-0.15485	-0.11575	1.11083	2.17298	655.9	0.01837	0.00789	0.00758	0.00814
655.8	-0.26956	-0.17623	0.96008	2.13083	655.8	0.01839	0.00788	0.00762	0.00815
655.7	0.26951	-0.15144	0.91703	2.01922	655.7	0.01844	0.00791	0.00765	0.00818
655.6	0.70854	0.02598	0.75795	2.03013	655.6	0.01844	0.00792	0.00765	0.0082
655.5	0.53178	0.17349	0.63304	1.82092	655.5	0.0185	0.00792	0.00764	0.00819
655.4	1.06446	0.58409	0.60096	1.67492	655.4	0.01852	0.00792	0.00767	0.0082
655.3	0.62518	0.49516	0.46632	1.62241	655.3	0.01854	0.00791	0.00769	0.00822
655.2	1.05788	0.51961	0.52193	1.58818	655.2	0.01857	0.00791	0.00768	0.00821
655.1	1.62503	0.39634	0.5261	1.55477	655.1	0.01856	0.00795	0.0077	0.00822
655	0.98331	0.44721	0.38112	1.23675	655	0.01855	0.00797	0.00768	0.00823
654.9	0.80754	0.20203	0.719	1.41599	654.9	0.01858	0.00796	0.00766	0.00822
654.8	0.53452	0.46669	0.57828	1.53904	654.8	0.0186	0.00797	0.00771	0.0082
654.7	-0.18964	0.33745	0.69955	1.60167	654.7	0.01862	0.00801	0.0077	0.00821
654.6	-0.01217	0.45363	0.62331	1.58187	654.6	0.01865	0.00799	0.00771	0.00825
654.5	0.23546	0.51427	0.58677	1.66991	654.5	0.01867	0.00802	0.00771	0.00824
654.4	-0.21742	0.60273	0.61475	1.57885	654.4	0.0187	0.00803	0.00775	0.00826
654.3	-0.00409	0.52796	0.41278	1.46174	654.3	0.01874	0.00803	0.00777	0.00829
654.2	0.80369	0.5799	0.35025	1.48974	654.2	0.01871	0.00805	0.00778	0.00826
654.1	0.54387	0.3856	0.06589	1.51779	654.1	0.0187	0.00803	0.00778	0.00824
654	0.27131	0.42542	0.35022	1.31198	654	0.01872	0.00806	0.00782	0.00824
653.9	0.17853	0.13544	0.6381	1.38595	653.9	0.01871	0.00806	0.00783	0.00823
653.8	-0.25445	0.3912	0.41343	1.42774	653.8	0.01874	0.00807	0.00783	0.00824
653.7	-0.27351	0.60509	0.45189	1.53123	653.7	0.01877	0.00807	0.00783	0.00828
653.6	-0.43708	0.84824	0.54401	1.35604	653.6	0.01881	0.00809	0.00778	0.0083
653.5	-0.25648	0.8564	0.47264	1.47724	653.5	0.01883	0.0081	0.00778	0.0083
653.4	-0.33286	0.57884	0.73376	1.4465	653.4	0.01882	0.0081	0.00781	0.0083
653.3	-0.5715	0.57719	0.57202	1.25215	653.3	0.01884	0.00812	0.0078	0.00827
653.2	-1.02695	0.52695	0.50944	1.30499	653.2	0.01885	0.00813	0.0078	0.0083
653.1	-1.10707	0.32346	0.20388	1.39972	653.1	0.01891	0.00816	0.00781	0.00832
653	-0.89462	0.0807	0.10185	1.30525	653	0.01894	0.00821	0.00781	0.00836
652.9	-0.86366	0.25262	-0.0259	1.42746	652.9	0.01895	0.0082	0.00778	0.00838
652.8	-0.61123	0.33239	-0.17902	1.30461	652.8	0.01897	0.00818	0.00778	0.0084
652.7	-1.00467	0.23884	-0.19807	1.24013	652.7	0.01897	0.00816	0.00779	0.00838
652.6	-0.43904	0.48616	-0.24743	1.07545	652.6	0.01898	0.0082	0.00779	0.00839
652.5	0.13743	0.65209	-0.24637	1.13534	652.5	0.01902	0.0082	0.00778	0.00839
652.4	-0.14085	0.57794	-0.25268	0.93418	652.4	0.01899	0.00821	0.00776	0.00836
652.3	-0.35843	0.31177	-0.17896	0.9519	652.3	0.01903	0.00819	0.00776	0.00839
652.2	-0.40158	-0.05559	0.00294	1.28426	652.2	0.01908	0.00819	0.00778	0.00843
652.1	-0.24304	-0.1184	-0.08885	1.37931	652.1	0.01909	0.00818	0.00778	0.00846
652	-0.28815	-0.18562	-0.07014	1.27563	652	0.01911	0.0082	0.00779	0.00845
651.9	-0.48959	-0.1529	0.10469	1.2583	651.9	0.01911	0.00824	0.00778	0.00853
651.8	-0.6604	0.07818	0.19197	1.1061	651.8	0.01914	0.00825	0.00779	0.00855
651.7	0.39555	-0.01063	0.03491	1.13288	651.7	0.01917	0.00826	0.00777	0.00856
651.6	0.39208	0.19878	-0.3703	1.25483	651.6	0.01918	0.00828	0.00778	0.00861
651.5	0.4539	-0.09189	-0.23548	1.17251	651.5	0.01918	0.00828	0.00777	0.00859
651.4	0.85503	-0.22442	-0.67123	1.1924	651.4	0.01921	0.00831	0.00778	0.00858
651.3	0.8533	-0.13417	-0.68082	1.26381	651.3	0.01924	0.00832	0.00777	0.00857
651.2	0.95592	0.00948	-0.53984	1.18578	651.2	0.01926	0.00834	0.00781	0.0086
651.1	1.71959	0.09202	-0.65623	1.12868	651.1	0.01924	0.00834	0.00778	0.00864
651	2.29707	0.19917	-0.55688	1.1866	651	0.01922	0.00834	0.00778	0.00862
650.9	1.41892	0.22148	-0.47642	0.8877	650.9	0.01927	0.00837	0.00781	0.00864
650.8	1.66018	0.03177	-0.4649	0.99706	650.8	0.01932	0.00841	0.00784	0.00867
650.7	2.25707	0.11824	-0.31938	0.88673	650.7	0.01935	0.00842	0.00784	0.00869
650.6	2.06458	-0.0677	-0.65019	0.65598	650.6	0.01934	0.00841	0.00785	0.00874
650.5	1.90412	0.13066	-0.7795	0.77595	650.5	0.01939	0.00844	0.00787	0.00874
650.4	1.42596	-0.02639	-0.89271	1.02624	650.4	0.01943	0.00845	0.00786	0.00872
650.3	2.00868	-0.15441	-0.81006	1.02653	650.3	0.01942	0.00847	0.00789	0.00872
650.2	2.67479	-0.39179	-0.49149	0.70007	650.2	0.01943	0.00848	0.00796	0.00874
650.1	3.01098	-0.30712	-0.58949	0.99163	650.1	0.01947	0.0085	0.00797	0.00875
650	2.60007	-0.37505	-0.24674	0.99445	650	0.0195	0.0085	0.00797	0.00878
649.9	2.57898	-0.39906	-0.41424	1.22491	649.9	0.01952	0.00848	0.00798	0.00875
649.8	2.15038	-0.2197	-0.2353	1.30953	649.8	0.01954	0.00848	0.008	0.00874
649.7	2.42819	-0.04678	-0.23853	1.52815	649.7	0.01955	0.00847	0.008	0.00876
649.6	2.67673	-0.1478	-0.18633	1.30922	649.6	0.01956	0.00846	0.00803	0.0087
649.5	2.16198	-0.17732	-0.11679	1.55794	649.5	0.0196	0.00846	0.00801	0.0087
649.4	2.24454	-0.0726	0.07646	1.65575	649.4	0.01963	0.00849	0.00802	0.00873
649.3	2.00079	-0.43258	-0.25889	1.84266	649.3	0.01967	0.0085	0.00803	0.00875
649.2	2.29855	-0.48187	-0.09151	1.91265	649.2	0.01968	0.00852	0.00806	0.00876
649.1	1.64824	-0.5963	-0.1929	1.83934	649.1	0.01973	0.00853	0.00808	0.00878
649	1.36773	0.00144	-0.35266	1.73795	649	0.01977	0.00855	0.00809	0.0088
648.9	1.75431	-0.00988	-0.33273	1.50142	648.9	0.01979	0.0086	0.00813	0.00882
648.8	1.982	-0.00698	-0.06843	1.5716	648.8	0.01984	0.00865	0.00814	0.00877
648.7	2.31119	0.03109	-0.02804	1.78276	648.7	0.01987	0.00863	0.00815	0.00875
648.6	2.80495	-0.20658	-0.52229	1.48324	648.6	0.01992	0.00859	0.00815	0.00872
648.5	2.73369	0.03123	-0.59863	1.83252	648.5	0.01993	0.00857	0.00818	0.0087
648.4	1.99684	0.096	-0.61133	2.01294	648.4	0.01993	0.00858	0.00822	0.00873
648.3	1.53766	0.05757	-0.37564	1.86045	648.3	0.01995	0.00858	0.00824	0.00873
648.2	0.50284	0.27134	-0.25576	1.73919	648.2	0.01999	0.00857	0.00828	0.00875
648.1	0.38991	0.33623	-0.17684	1.74604	648.1	0.02001	0.00855	0.00828	0.0088
648	0.15604	0.25569	0.000453832	1.89107	648	0.02005	0.00855	0.00834	0.00879
647.9	-0.06441	0.13206	0.01398	1.80426	647.9	0.02008	0.00854	0.00834	0.00877
647.8	0.11305	0.24443	0.08678	1.85904	647.8	0.0201	0.00855	0.00836	0.00877
647.7	-0.15524	0.25804	0.04926	1.76213	647.7	0.02014	0.00858	0.00839	0.00879
647.6	0.0052	-0.05244	-0.03647	2.001	647.6	0.02021	0.0086	0.0084	0.00879
647.5	0.10031	0.03163	0.21715	2.05022	647.5	0.02022	0.00857	0.00839	0.00879
647.4	0.17064	0.02857	0.06913	2.11627	647.4	0.02024	0.00858	0.00839	0.00876
647.3	-0.50224	0.06501	-0.03993	2.01981	647.3	0.02028	0.00857	0.0084	0.00875
647.2	-0.25527	0.17781	-0.01175	1.8879	647.2	0.02032	0.0086	0.0084	0.00876
647.1	0.72276	0.22063	0.21235	1.67123	647.1	0.02031	0.00859	0.00842	0.00881
647	0.92362	0.13834	0.22891	1.49011	647	0.02032	0.0086	0.00839	0.00883
646.9	0.68687	-0.04517	0.06183	1.42092	646.9	0.02035	0.00858	0.00837	0.00885
646.8	0.90737	0.25636	-0.02315	1.65679	646.8	0.02034	0.0086	0.00836	0.00884
646.7	0.5669	0.12808	0.17927	1.31093	646.7	0.02036	0.0086	0.00835	0.0088
646.6	0.90736	0.14146	0.38172	1.52339	646.6	0.02042	0.00862	0.00835	0.0088
646.5	1.3335	-0.01865	0.34991	1.79203	646.5	0.02046	0.00864	0.00837	0.00879
646.4	1.42873	-0.12405	0.285	1.66347	646.4	0.0205	0.00867	0.00835	0.00883
646.3	0.66065	-0.06205	0.21423	1.41122	646.3	0.02053	0.0087	0.0084	0.00886
646.2	0.82603	0.20717	0.21661	1.20222	646.2	0.02055	0.00871	0.0084	0.00889
646.1	1.4404	0.32489	-0.18873	0.81954	646.1	0.02058	0.00871	0.00842	0.00893
646	0.76534	0.4773	-0.07667	0.80096	646	0.02059	0.00871	0.00843	0.00891
645.9	0.42056	0.37703	0.06767	0.86708	645.9	0.02059	0.0087	0.00845	0.0089
645.8	-0.01582	0.67352	-0.06116	0.6754	645.8	0.0206	0.0087	0.00846	0.00888
645.7	0.37938	0.65723	-0.07317	1.19529	645.7	0.02062	0.00872	0.00846	0.00893
645.6	0.33983	0.52969	-0.17994	0.85317	645.6	0.02063	0.00873	0.00848	0.00893
645.5	0.34668	0.31249	-0.58272	1.1539	645.5	0.02066	0.00872	0.00847	0.00897
645.4	0.20726	0.3071	-0.618	0.86641	645.4	0.02067	0.00873	0.00847	0.00901
645.3	0.11482	0.42773	-0.25004	0.78816	645.3	0.0207	0.00878	0.00848	0.00904
645.2	-0.06227	0.37161	-0.09711	1.0009	645.2	0.02071	0.00879	0.0085	0.00907
645.1	0.51945	0.23814	0.20892	1.0698	645.1	0.02076	0.00881	0.0085	0.0091
645	-0.11248	0.50403	0.09326	0.94114	645	0.02079	0.00881	0.00849	0.00908
644.9	0.59086	0.54159	0.34492	1.13314	644.9	0.02083	0.00879	0.00852	0.00906
644.8	0.81965	0.38922	0.41141	1.24988	644.8	0.02086	0.00882	0.0085	0.00906
644.7	1.09557	0.28291	0.58495	1.51539	644.7	0.02089	0.00884	0.00851	0.00905
644.6	0.82088	0.21512	0.6629	1.41307	644.6	0.02095	0.00885	0.00853	0.00908
644.5	0.36842	0.26146	0.79008	1.61625	644.5	0.02096	0.00887	0.00854	0.00908
644.4	0.21098	0.24257	0.8397	1.81658	644.4	0.02099	0.00887	0.00854	0.00909
644.3	-0.17297	0.3515	0.86871	2.10634	644.3	0.02104	0.00889	0.00855	0.0091
644.2	0.04957	0.32377	0.82365	2.10694	644.2	0.02108	0.00889	0.00852	0.00911
644.1	0.39866	0.26423	0.72565	2.15175	644.1	0.02113	0.00891	0.00852	0.00913
644	0.53257	0.20382	0.75465	2.41751	644	0.02117	0.00894	0.00854	0.00913
643.9	0.97656	0.13551	0.64338	2.41501	643.9	0.02121	0.00896	0.00855	0.00918
643.8	0.87614	0.20735	0.71453	2.9275	643.8	0.02126	0.00896	0.00856	0.00915
643.7	0.81833	0.28572	0.72448	3.16935	643.7	0.02129	0.00896	0.00859	0.00919
643.6	0.7219	0.44251	0.63416	3.00027	643.6	0.02133	0.00898	0.0086	0.00918
643.5	0.7028	0.26195	0.99678	3.13232	643.5	0.02141	0.00898	0.00863	0.00919
643.4	0.86177	0.1001	0.6597	3.24401	643.4	0.02146	0.009	0.0086	0.00923
643.3	0.59372	0.29165	0.64041	3.16388	643.3	0.02148	0.00899	0.00863	0.00926
643.2	0.80678	0.45026	0.5741	3.08891	643.2	0.02148	0.00901	0.00863	0.00932
643.1	1.33949	0.76765	0.33479	2.87424	643.1	0.02151	0.00901	0.00865	0.0093
643	1.14994	0.77171	0.29949	2.82273	643	0.02158	0.00902	0.00866	0.00927
642.9	1.22169	0.54698	0.52793	2.9294	642.9	0.02164	0.00903	0.00867	0.00929
642.8	0.66877	0.33328	0.77954	3.13438	642.8	0.02166	0.00906	0.00869	0.00929
642.7	0.63395	0.34899	0.91458	3.18314	642.7	0.02169	0.00909	0.00869	0.00928
642.6	0.89448	0.70506	0.9768	3.4561	642.6	0.02176	0.00911	0.0087	0.00929
642.5	1.23783	0.8652	0.95799	3.62517	642.5	0.0218	0.00911	0.00871	0.00931
642.4	0.9591	0.85235	1.00595	3.44583	642.4	0.02179	0.00911	0.00872	0.00936
642.3	0.84323	0.57466	1.09002	3.23537	642.3	0.02181	0.0091	0.00871	0.00935
642.2	1.28358	0.61785	1.39887	3.22359	642.2	0.02181	0.00914	0.00872	0.00934
642.1	0.79908	0.59021	1.35658	3.14906	642.1	0.02184	0.00914	0.00874	0.00936
642	0.26024	0.48447	1.54899	3.00261	642	0.02188	0.00916	0.00872	0.00937
641.9	0.48654	0.26443	1.50486	2.78363	641.9	0.02192	0.00915	0.00871	0.00938
641.8	-0.47706	0.39976	1.37647	2.69553	641.8	0.02195	0.00918	0.00869	0.00939
641.7	-0.2894	0.42378	1.43038	2.66002	641.7	0.02199	0.00917	0.00875	0.00943
641.6	-0.18406	0.31567	1.44304	2.40037	641.6	0.02204	0.00919	0.00878	0.00946
641.5	-0.2777	0.33148	1.3902	2.12595	641.5	0.02203	0.00923	0.0088	0.00947
641.4	-0.34843	0.52203	1.48901	1.94977	641.4	0.02203	0.00924	0.0088	0.00947
641.3	0.00891	0.47791	1.29099	1.91206	641.3	0.022	0.00929	0.00881	0.00947
641.2	-0.14448	0.42735	1.07254	1.65357	641.2	0.02203	0.00928	0.00878	0.00948
641.1	0.2413	0.23771	1.00949	1.41342	641.1	0.02204	0.00928	0.00878	0.00951
641	0.53477	0.13253	1.08624	1.08846	641	0.02206	0.00928	0.00879	0.00954
640.9	-0.02013	0.10641	0.93289	0.7662	640.9	0.02204	0.00928	0.00885	0.00956
640.8	-0.22395	0.16043	0.89007	0.88263	640.8	0.02205	0.00927	0.00889	0.00957
640.7	0.0876	0.53111	1.1178	0.73375	640.7	0.02205	0.00926	0.00894	0.00957
640.6	-0.09496	0.54549	1.10536	0.44968	640.6	0.02206	0.00926	0.00892	0.00959
640.5	-0.26754	0.7603	1.3324	0.19969	640.5	0.02211	0.00929	0.00891	0.00958
640.4	0.20263	0.95408	1.46691	0.08259	640.4	0.0221	0.00929	0.00895	0.00956
640.3	0.00761	1.07186	1.4332	0.05268	640.3	0.02215	0.0093	0.00893	0.00958
640.2	-0.69394	0.99146	1.12386	0.21245	640.2	0.02214	0.00932	0.00898	0.00959
640.1	-1.78281	1.19339	0.97359	-0.05837	640.1	0.02216	0.00931	0.00899	0.00954
640	-2.19264	1.3281	0.90552	-0.11848	640	0.02216	0.00933	0.00901	0.00957
639.9	-2.03089	1.22575	0.87153	-0.27304	639.9	0.02216	0.00933	0.00903	0.00959
639.8	-1.66139	1.27207	0.78465	-0.50717	639.8	0.02219	0.00935	0.00903	0.00963
639.7	-1.98846	0.93219	0.64996	-0.62929	639.7	0.02217	0.00935	0.00907	0.00967
639.6	-2.07937	0.7667	0.75033	-0.82583	639.6	0.02216	0.00937	0.00906	0.00967
639.5	-2.43847	0.91321	0.44593	-1.03141	639.5	0.02217	0.00936	0.00906	0.0097
639.4	-2.46442	0.94904	0.52332	-0.74842	639.4	0.02219	0.00935	0.0091	0.00972
639.3	-2.13085	0.61352	0.44095	-0.90332	639.3	0.02217	0.00938	0.00913	0.00975
639.2	-2.31267	0.46266	0.62326	-1.19187	639.2	0.02222	0.0094	0.00914	0.00977
639.1	-2.47566	0.38017	0.76859	-1.25395	639.1	0.02226	0.00939	0.00914	0.00979
639	-1.90564	0.59244	0.77114	-1.22876	639	0.02234	0.00941	0.00914	0.00979
638.9	-1.68092	0.60671	0.67912	-1.07293	638.9	0.02237	0.0094	0.00914	0.00981
638.8	-1.86856	0.62563	0.61613	-0.9535	638.8	0.02241	0.00941	0.00915	0.0098
638.7	-1.50802	0.80865	0.31727	-0.93144	638.7	0.02243	0.00942	0.00915	0.00979
638.6	-1.20138	0.71929	0.25549	-1.03054	638.6	0.02247	0.00944	0.00914	0.00977
638.5	-0.50322	0.355	0.26772	-1.07727	638.5	0.02249	0.00947	0.00918	0.00978
638.4	-0.53093	0.44383	0.06335	-1.12083	638.4	0.0225	0.00948	0.00915	0.00977
638.3	-0.8026	0.36392	-0.00602	-0.97451	638.3	0.02252	0.00948	0.00912	0.00977
638.2	-0.70735	0.22435	0.02026	-0.85231	638.2	0.02256	0.0095	0.0091	0.00979
638.1	-0.21918	0.23342	-0.09579	-0.99133	638.1	0.0226	0.00949	0.00914	0.00984
638	-0.21342	0.44478	-0.13045	-1.10256	638	0.02267	0.00948	0.00913	0.00986
637.9	0.02994	0.46253	-0.00121	-0.79977	637.9	0.02271	0.00949	0.00913	0.00987
637.8	0.23003	0.51759	-0.07678	-0.92767	637.8	0.02277	0.00951	0.00916	0.00988
637.7	0.28596	0.57721	-0.0803	-0.82399	637.7	0.02281	0.0095	0.00918	0.00989
637.6	0.73193	0.80125	0.22535	-0.42549	637.6	0.02288	0.00953	0.00914	0.00992
637.5	1.7198	0.47801	0.11611	-0.39085	637.5	0.02292	0.00956	0.00911	0.00994
637.4	1.30294	0.24105	-0.1228	-0.1536	637.4	0.02296	0.00959	0.00912	0.00998
637.3	0.65419	0.32536	0.0211	-0.27794	637.3	0.02294	0.00962	0.00917	0.00996
637.2	1.27381	-0.30718	-0.31136	-0.43593	637.2	0.02294	0.00962	0.00919	0.00997
637.1	0.53155	-0.43658	-0.50112	-0.34544	637.1	0.02299	0.00964	0.00918	0.00999
637	0.42488	-0.36448	-0.54182	-0.59662	637	0.02301	0.00968	0.00922	0.00996
636.9	0.83599	-0.28518	-0.34158	-0.76026	636.9	0.02305	0.00969	0.00921	0.00998
636.8	1.33018	-0.20209	-0.31302	-0.83582	636.8	0.02311	0.00968	0.00924	0.01001
636.7	2.06889	-0.04327	-0.1831	-0.44631	636.7	0.02318	0.00969	0.00925	0.01002
636.6	1.78715	-0.2648	-0.10625	-0.11914	636.6	0.02325	0.00973	0.00926	0.01004
636.5	1.29924	-0.16953	0.09278	-0.11273	636.5	0.02326	0.00975	0.00928	0.01002
636.4	1.59247	-0.00375	0.53106	0.000544823	636.4	0.02329	0.00977	0.00925	0.01001
636.3	1.45814	0.268	0.31135	-0.13123	636.3	0.02332	0.0098	0.00925	0.01002
636.2	1.79794	0.14989	0.69877	0.2906	636.2	0.02337	0.00979	0.0093	0.01004
636.1	2.05586	0.21606	0.71197	-0.00431	636.1	0.02338	0.0098	0.00932	0.01005
636	1.61421	0.392	0.90239	0.0555	636	0.02338	0.00978	0.0093	0.01008
635.9	1.22695	0.41147	0.79525	0.11103	635.9	0.02339	0.00978	0.00929	0.01006
635.8	1.27958	0.55441	0.91152	0.14395	635.8	0.0234	0.00982	0.00931	0.01004
635.7	1.18246	0.30635	0.82217	0.15339	635.7	0.0234	0.00985	0.00935	0.01006
635.6	0.94181	0.38243	1.12817	0.06163	635.6	0.02343	0.00989	0.00936	0.01005
635.5	1.31159	0.46438	1.2135	0.09538	635.5	0.02347	0.0099	0.00938	0.01011
635.4	2.19602	0.52571	1.0373	0.07211	635.4	0.02349	0.00995	0.00942	0.01013
635.3	1.67811	0.66426	1.05875	0.33868	635.3	0.02351	0.00996	0.00944	0.01011
635.2	1.84785	1.15775	0.88614	0.22114	635.2	0.02351	0.00996	0.00945	0.01013
635.1	1.64311	1.02495	0.97663	0.54258	635.1	0.02354	0.00998	0.00947	0.01017
635	2.29757	0.82687	1.06934	0.32636	635	0.02359	0.00999	0.00947	0.0102
634.9	2.06066	0.69925	0.96825	0.55054	634.9	0.02368	0.01001	0.00945	0.01023
634.8	1.01233	0.87776	1.01615	0.30243	634.8	0.02371	0.01004	0.00945	0.01022
634.7	0.43162	0.98889	0.98181	-0.01866	634.7	0.02372	0.01006	0.00948	0.01025
634.6	0.07768	1.10242	1.01781	-0.12001	634.6	0.02376	0.01007	0.00948	0.01026
634.5	-0.14744	0.99657	0.85667	0.12813	634.5	0.02379	0.01008	0.0095	0.01025
634.4	0.1046	0.85814	0.85628	0.05166	634.4	0.02379	0.01014	0.00953	0.01023
634.3	-0.32877	0.94787	0.58521	-0.05622	634.3	0.02379	0.01018	0.00955	0.01022
634.2	-0.74885	1.02311	0.4535	-0.1868	634.2	0.0238	0.01018	0.00957	0.01024
634.1	-0.76034	1.03052	0.70893	-0.4079	634.1	0.02382	0.01017	0.00955	0.01021
634	-1.28444	1.04658	0.82244	0.10012	634	0.02391	0.01014	0.00954	0.01027
633.9	-2.69251	1.34847	1.10181	0.28296	633.9	0.02396	0.01012	0.00952	0.01029
633.8	-2.40972	1.52531	1.43266	0.39767	633.8	0.02397	0.01012	0.00954	0.0103
633.7	-2.79409	1.45427	1.26161	0.48702	633.7	0.024	0.01013	0.00952	0.01034
633.6	-3.14956	1.41809	1.27645	0.58343	633.6	0.02402	0.01016	0.00954	0.01037
633.5	-3.42779	1.45317	1.40406	0.81858	633.5	0.02404	0.01019	0.00955	0.01038
633.4	-3.38721	1.33272	1.33171	0.45469	633.4	0.02405	0.01021	0.00954	0.01037
633.3	-3.00761	1.40222	1.34713	0.49075	633.3	0.02408	0.01021	0.00953	0.01036
633.2	-2.67986	1.22087	1.06973	0.54665	633.2	0.02416	0.01021	0.00954	0.01038
633.1	-2.41073	1.24105	0.70506	0.49066	633.1	0.02418	0.01025	0.00958	0.01038
633	-2.19177	1.42811	0.83398	1.04206	633	0.02421	0.01024	0.00961	0.01037
632.9	-2.74835	1.20971	0.95908	0.72988	632.9	0.02424	0.01025	0.00961	0.01035
632.8	-2.35619	1.68916	0.93334	0.87744	632.8	0.02431	0.01024	0.00959	0.01035
632.7	-2.33043	1.54913	0.82118	0.98247	632.7	0.02439	0.01024	0.00962	0.01039
632.6	-2.02702	1.32239	1.02011	0.78318	632.6	0.02442	0.01025	0.00963	0.01043
632.5	-1.81951	1.26278	0.97921	0.85279	632.5	0.02448	0.0103	0.00967	0.01045
632.4	-1.98562	1.36308	0.80935	0.80021	632.4	0.02452	0.01032	0.00969	0.01051
632.3	-1.82217	1.47059	0.79813	0.74049	632.3	0.02457	0.01032	0.00968	0.01053
632.2	-1.75504	1.2286	0.80509	0.54919	632.2	0.02463	0.01036	0.0097	0.01049
632.1	-1.57546	1.01881	0.88297	0.91766	632.1	0.02467	0.01038	0.00969	0.0105
632	-2.433	0.70952	1.00315	0.90546	632	0.02471	0.01039	0.00972	0.01052
631.9	-2.09551	0.68521	1.04986	0.97463	631.9	0.02476	0.01041	0.00973	0.01053
631.8	-1.93867	0.72613	0.92361	1.16901	631.8	0.02481	0.01044	0.00974	0.01053
631.7	-1.80223	0.51649	0.90053	1.06997	631.7	0.02484	0.01046	0.00974	0.0105
631.6	-2.13655	1.00796	0.7428	1.13852	631.6	0.02482	0.01047	0.00981	0.01048
631.5	-0.99917	1.05135	0.92023	1.06284	631.5	0.02485	0.01051	0.00987	0.0105
631.4	-0.88755	1.00953	0.86212	1.04401	631.4	0.02485	0.01048	0.0099	0.01052
631.3	-0.7466	1.38408	0.95882	1.27991	631.3	0.02487	0.01049	0.00994	0.01054
631.2	-1.04504	1.09392	0.73726	1.20446	631.2	0.02489	0.01054	0.00998	0.01054
631.1	-1.27968	1.28784	0.87356	1.46913	631.1	0.02494	0.01052	0.01	0.01058
631	-1.9219	1.39045	0.90961	1.47863	631	0.02501	0.01052	0.00999	0.01063
630.9	-2.09216	1.27554	1.36677	1.55163	630.9	0.02508	0.01052	0.00999	0.01063
630.8	-1.75325	1.43093	1.16418	1.80935	630.8	0.02515	0.01056	0.00998	0.01063
630.7	-1.34859	1.61971	0.65681	1.8705	630.7	0.02519	0.0106	0.01002	0.01064
630.6	-0.79686	1.42002	0.6463	1.6928	630.6	0.02523	0.01065	0.01005	0.01067
630.5	0.34855	1.0611	0.24891	1.66592	630.5	0.02526	0.01069	0.01006	0.01067
630.4	1.04495	0.90399	0.14095	1.58861	630.4	0.02529	0.01072	0.01008	0.01069
630.3	1.82809	1.12369	0.06995	1.51085	630.3	0.02534	0.0107	0.01011	0.01072
630.2	1.98521	0.80628	-0.1427	1.86031	630.2	0.02535	0.0107	0.01014	0.01072
630.1	2.29596	0.64477	0.19187	1.81133	630.1	0.02538	0.01074	0.01013	0.01073
630	2.29882	1.13898	0.30359	1.9704	630	0.02539	0.01075	0.01014	0.01074
629.9	2.40422	0.87916	0.41923	2.15068	629.9	0.02539	0.01076	0.01021	0.01078
629.8	1.79427	1.02295	0.34017	2.52157	629.8	0.02546	0.01076	0.0102	0.01082
629.7	1.50293	0.71244	0.32709	2.75093	629.7	0.02549	0.01076	0.01023	0.01089
629.6	2.22415	0.78688	0.458	2.72191	629.6	0.02551	0.0108	0.01023	0.01091
629.5	2.62736	0.40573	0.55304	2.35808	629.5	0.02555	0.01083	0.01022	0.01092
629.4	1.84615	0.36611	0.45394	2.33464	629.4	0.02558	0.01089	0.01023	0.01092
629.3	1.65963	-0.09771	0.40036	2.38306	629.3	0.02565	0.01093	0.01026	0.01093
629.2	1.37005	0.36811	0.39298	2.27699	629.2	0.02571	0.01095	0.01026	0.01096
629.1	2.06738	0.27948	0.61698	2.6503	629.1	0.02577	0.01092	0.01024	0.01096
629	1.29427	0.28821	0.62649	2.92587	629	0.02578	0.01089	0.01024	0.01098
628.9	0.92261	0.05561	0.35526	2.91101	628.9	0.02579	0.01088	0.01027	0.01105
628.8	0.92232	0.12416	0.44531	3.24143	628.8	0.02585	0.01087	0.01026	0.01104
628.7	0.91615	0.65117	0.23228	3.30542	628.7	0.02585	0.01088	0.01029	0.01106
628.6	0.75178	0.56755	0.07252	3.37064	628.6	0.02588	0.01088	0.01031	0.01106
628.5	0.5213	0.27417	0.19053	3.15363	628.5	0.02595	0.01088	0.01032	0.01108
628.4	0.58248	-0.02762	0.1818	3.33471	628.4	0.02597	0.01089	0.01035	0.01112
628.3	0.69571	-0.05423	0.15194	3.45822	628.3	0.026	0.01091	0.01036	0.01115
628.2	-0.22529	-0.09817	0.01818	3.52439	628.2	0.02603	0.01091	0.01032	0.01117
628.1	-0.43052	-0.29736	0.16877	3.75725	628.1	0.02608	0.01093	0.01029	0.01114
628	0.23603	-0.64527	-0.07838	3.82733	628	0.02613	0.01097	0.01027	0.01116
627.9	0.92582	-0.36743	0.13987	3.86036	627.9	0.02616	0.01095	0.01021	0.0112
627.8	1.34632	-0.38822	0.16851	3.93413	627.8	0.02621	0.01098	0.01021	0.01118
627.7	2.04951	-0.43277	0.29	3.8034	627.7	0.02622	0.01098	0.01027	0.01117
627.6	2.08289	-0.44118	0.19741	3.75846	627.6	0.02626	0.011	0.01028	0.01119
627.5	2.16918	-0.28157	0.14172	3.31279	627.5	0.02624	0.011	0.01029	0.01124
627.4	2.06187	-0.57994	0.66444	2.93196	627.4	0.02629	0.011	0.0103	0.01127
627.3	2.64679	-0.46338	0.72337	3.07662	627.3	0.02631	0.011	0.01032	0.01126
627.2	2.31009	-0.46302	0.54956	3.41299	627.2	0.02638	0.011	0.01034	0.01127
627.1	1.68638	-0.04195	0.4354	2.95848	627.1	0.0264	0.01101	0.01034	0.01129
627	1.61366	-0.1531	0.53013	3.33714	627	0.02647	0.01099	0.01033	0.01131
626.9	1.66859	-0.10798	0.60757	3.1777	626.9	0.02651	0.01102	0.01032	0.01134
626.8	1.95817	0.04021	0.34771	3.06769	626.8	0.02654	0.01101	0.01033	0.01136
626.7	2.24852	-0.22105	0.21894	2.76293	626.7	0.02658	0.01104	0.01038	0.01138
626.6	2.18606	-0.19533	0.17413	2.91127	626.6	0.02663	0.01105	0.0104	0.01138
626.5	2.66609	-0.29457	0.04905	2.42712	626.5	0.02665	0.01108	0.01043	0.01137
626.4	2.85503	0.03893	-0.00101	1.72376	626.4	0.02666	0.01108	0.01041	0.01136
626.3	2.25025	-0.20287	-0.41433	1.82959	626.3	0.02671	0.01109	0.01041	0.01138
626.2	1.92891	-0.21221	-0.40539	1.88887	626.2	0.02672	0.01114	0.01041	0.01139
626.1	1.98399	-0.11425	-0.53949	1.77619	626.1	0.02675	0.01116	0.01045	0.01142
626	2.58194	0.45242	-0.5628	1.69975	626	0.02675	0.01116	0.01047	0.01143
625.9	2.1273	0.29489	-0.75685	1.99223	625.9	0.02679	0.01119	0.0105	0.01146
625.8	1.51188	0.37586	-0.90516	1.67328	625.8	0.0268	0.01118	0.01052	0.01145
625.7	1.48799	0.6662	-0.93466	1.68329	625.7	0.02685	0.01123	0.01055	0.01147
625.6	1.38495	0.91426	-0.834	1.89063	625.6	0.02692	0.01126	0.01055	0.01146
625.5	1.29105	1.31674	-0.71151	1.87196	625.5	0.02692	0.0113	0.01058	0.01151
625.4	0.74401	1.31222	-0.45759	1.84386	625.4	0.02696	0.0113	0.01059	0.01154
625.3	1.03482	1.383	-0.43352	1.44164	625.3	0.02701	0.01132	0.0106	0.01157
625.2	1.11349	2.26098	-0.29356	1.42197	625.2	0.02702	0.01132	0.01063	0.01159
625.1	1.43837	2.53996	-0.21804	1.1076	625.1	0.02709	0.0113	0.01065	0.0116
625	1.24997	2.45327	-0.21744	1.03172	625	0.02714	0.01129	0.01068	0.01161
624.9	2.59636	2.59664	-0.22555	1.05186	624.9	0.02717	0.01133	0.01071	0.01161
624.8	1.6143	2.92785	-0.26961	0.83612	624.8	0.02721	0.01137	0.0108	0.01166
624.7	1.5397	2.81832	0.0683	0.99906	624.7	0.02726	0.01139	0.01083	0.01167
624.6	1.46579	2.51371	-0.06284	0.94063	624.6	0.02732	0.01141	0.01088	0.01165
624.5	1.12174	2.45644	-0.03334	0.57299	624.5	0.02734	0.01143	0.01088	0.0117
624.4	0.59958	2.61011	0.371	0.55975	624.4	0.0274	0.01144	0.01089	0.0117
624.3	0.57856	2.56063	0.17481	0.7701	624.3	0.02741	0.01144	0.01086	0.0117
624.2	0.42097	2.71764	0.35104	1.03818	624.2	0.0275	0.01147	0.01088	0.01173
624.1	1.04837	2.59315	0.25579	1.28722	624.1	0.02754	0.01151	0.01088	0.01173
624	1.39198	2.66828	0.31061	1.08194	624	0.0276	0.01152	0.01088	0.01174
623.9	1.45886	2.66997	0.46065	1.12965	623.9	0.02757	0.01152	0.01092	0.01174
623.8	1.87117	2.35448	0.32688	0.85914	623.8	0.02758	0.01158	0.01096	0.01175
623.7	2.3745	2.63106	0.26994	0.63891	623.7	0.0276	0.01159	0.01101	0.01174
623.6	1.78374	2.42299	0.63668	0.60452	623.6	0.02764	0.01161	0.01102	0.01175
623.5	0.73887	2.76731	0.51544	0.60745	623.5	0.0277	0.01166	0.01099	0.0118
623.4	0.40181	2.30578	0.61027	0.67503	623.4	0.02772	0.01165	0.01101	0.01177
623.3	-0.07052	2.23695	0.49416	0.86412	623.3	0.02775	0.01164	0.011	0.01178
623.2	-0.77241	2.27654	0.57005	1.00557	623.2	0.02782	0.01165	0.01102	0.01182
623.1	-0.83445	2.22006	0.57369	1.07695	623.1	0.02785	0.01167	0.01108	0.01185
623	-0.50157	2.3093	0.48187	0.85624	623	0.02793	0.0117	0.01108	0.01186
622.9	-0.80122	1.89079	0.59633	1.4315	622.9	0.02797	0.01171	0.01111	0.01187
622.8	-0.44026	1.71212	0.31795	1.61288	622.8	0.02802	0.01174	0.01111	0.0119
622.7	-0.68941	1.73535	0.08835	1.50871	622.7	0.02809	0.01175	0.01113	0.01192
622.6	-0.0198	1.38476	-0.09883	1.45581	622.6	0.02811	0.01175	0.01112	0.01192
622.5	-0.27238	0.94264	0.22059	1.41104	622.5	0.02814	0.01177	0.01114	0.01196
622.4	0.17803	0.76767	0.54924	1.31139	622.4	0.02815	0.01179	0.01115	0.01198
622.3	0.26241	0.59258	0.28242	1.17851	622.3	0.02822	0.01179	0.01117	0.01198
622.2	0.64543	0.60636	0.22831	1.19681	622.2	0.02828	0.01181	0.01119	0.01199
622.1	0.80479	0.42687	0.11763	1.26195	622.1	0.02831	0.01181	0.01121	0.012
622	1.00859	0.20893	0.13238	1.20305	622	0.02838	0.01186	0.01123	0.01202
621.9	1.27623	-0.16083	0.10895	1.06211	621.9	0.02844	0.0119	0.01125	0.01203
621.8	1.04323	-0.21113	0.5119	1.004	621.8	0.02849	0.01194	0.01125	0.01203
621.7	-0.05324	-0.33952	0.39257	1.12158	621.7	0.02853	0.01197	0.01126	0.01204
621.6	0.45106	-0.7513	0.65652	1.25018	621.6	0.0286	0.01199	0.01119	0.01205
621.5	0.14086	-0.72868	0.49632	1.08605	621.5	0.02862	0.012	0.0112	0.01208
621.4	-0.60536	-0.53969	0.41976	1.13224	621.4	0.02867	0.01202	0.01121	0.01211
621.3	-0.71969	-0.45879	0.40263	0.96764	621.3	0.02871	0.01205	0.01122	0.01215
621.2	-0.36344	-0.45458	-0.03946	1.01994	621.2	0.02876	0.01207	0.01125	0.01219
621.1	-0.95526	-0.37567	0.25257	1.07158	621.1	0.02877	0.01208	0.01127	0.0122
621	-1.49031	-0.75975	0.33301	1.26244	621	0.02881	0.01211	0.0113	0.0122
620.9	-2.2763	-0.55622	0.20966	0.99053	620.9	0.02882	0.0121	0.0113	0.01223
620.8	-3.57344	-0.62799	-0.15315	0.82552	620.8	0.02886	0.01214	0.01132	0.01228
620.7	-4.76714	-0.8197	0.04497	0.54584	620.7	0.02895	0.01218	0.01132	0.0123
620.6	-4.81213	-0.74428	0.25597	0.45144	620.6	0.02902	0.0122	0.01132	0.01233
620.5	-5.74231	-0.73667	0.42896	0.63175	620.5	0.02905	0.01224	0.01137	0.01237
620.4	-5.05158	-0.73576	-0.08265	1.00305	620.4	0.02909	0.01224	0.01139	0.0124
620.3	-4.63333	-1.05123	-0.09088	1.60633	620.3	0.02914	0.01223	0.01143	0.01238
620.2	-4.04579	-0.30481	-0.31152	1.47501	620.2	0.0292	0.01226	0.01141	0.01243
620.1	-3.63506	0.00545	-0.22476	1.53783	620.1	0.02924	0.01229	0.0115	0.01245
620	-2.27007	-0.15119	0.32821	1.49255	620	0.02928	0.01233	0.01147	0.01244
619.9	-2.23144	-0.16253	0.53753	1.62901	619.9	0.02934	0.01231	0.01152	0.01246
619.8	-2.01078	-0.15952	0.67335	1.62878	619.8	0.02936	0.01234	0.0115	0.01249
619.7	-2.98657	0.14347	0.6899	1.11679	619.7	0.0294	0.0123	0.01153	0.01249
619.6	-3.29123	0.4182	0.6789	1.48225	619.6	0.02945	0.01232	0.01157	0.01248
619.5	-3.29685	0.42153	1.0534	1.36735	619.5	0.02944	0.01235	0.01157	0.01246
619.4	-3.33711	0.74508	0.95787	1.32319	619.4	0.02948	0.01238	0.01157	0.01246
619.3	-3.27753	1.19436	1.04311	0.84423	619.3	0.02954	0.01241	0.01158	0.01248
619.2	-3.09394	0.95012	1.09643	0.85677	619.2	0.02956	0.01241	0.01161	0.01251
619.1	-2.75018	0.9212	1.24503	0.43745	619.1	0.02961	0.01245	0.01165	0.01253
619	-2.91788	0.66213	1.5133	0.66336	619	0.02967	0.01249	0.01167	0.01256
618.9	-3.13101	0.5263	1.65036	0.63306	618.9	0.02971	0.01251	0.01167	0.01254
618.8	-3.90355	0.39573	1.43965	0.83031	618.8	0.02973	0.01252	0.01167	0.01257
618.7	-3.16189	0.36945	1.21116	0.91483	618.7	0.0298	0.0125	0.0117	0.01259
618.6	-3.76647	0.24214	0.95402	0.98496	618.6	0.02979	0.01252	0.0117	0.01264
618.5	-3.55935	0.11241	0.78878	1.01673	618.5	0.02983	0.01251	0.01175	0.01266
618.4	-3.82494	-0.28947	0.75919	1.12014	618.4	0.02986	0.01249	0.01179	0.01269
618.3	-2.67962	-0.35798	1.10936	0.95739	618.3	0.02992	0.01247	0.0118	0.01269
618.2	-2.84175	-0.35764	0.89355	0.68739	618.2	0.02994	0.01249	0.01185	0.01272
618.1	-3.90153	-0.51967	0.71936	0.60488	618.1	0.02994	0.01251	0.01187	0.01273
618	-3.92109	-0.75732	0.92233	0.4769	618	0.02998	0.01255	0.01188	0.01274
617.9	-3.41718	-0.69903	0.78112	0.29727	617.9	0.03005	0.01258	0.01191	0.01275
617.8	-2.60691	-0.47778	0.83587	0.3372	617.8	0.0301	0.01261	0.01196	0.01279
617.7	-2.15748	-0.27899	1.14491	0.77615	617.7	0.03016	0.01265	0.01197	0.01278
617.6	-0.68122	-0.34313	1.51574	1.14494	617.6	0.03013	0.0126	0.01199	0.01281
617.5	-0.27857	-0.49957	1.55711	1.40469	617.5	0.03019	0.01262	0.01202	0.01283
617.4	-0.66686	-0.75132	1.66857	1.77365	617.4	0.03021	0.01266	0.012	0.01284
617.3	-0.13776	-0.58366	1.67514	1.44718	617.3	0.03029	0.01267	0.01203	0.01286
617.2	-0.44886	-0.51946	1.47242	0.72393	617.2	0.03033	0.01267	0.01206	0.01288
617.1	-0.75351	-0.20944	1.24031	0.61329	617.1	0.03037	0.01267	0.01208	0.0129
617	-1.07441	-0.55428	1.2103	0.44219	617	0.03041	0.01273	0.01206	0.01293
616.9	-1.39697	0.00713	1.03842	0.40329	616.9	0.03046	0.01271	0.01209	0.01299
616.8	-1.94663	-0.10387	0.82303	0.21669	616.8	0.03051	0.01274	0.0121	0.013
616.7	-1.9717	0.31042	1.03098	0.46998	616.7	0.03055	0.01275	0.0121	0.013
616.6	-1.8751	0.6642	0.7948	0.50811	616.6	0.03059	0.0128	0.01214	0.013
616.5	-0.53522	0.99046	0.87416	0.66278	616.5	0.03064	0.01283	0.01211	0.01308
616.4	-1.22977	0.65758	0.95549	0.80298	616.4	0.03067	0.01285	0.01212	0.0131
616.3	-1.29678	0.24279	0.6562	1.02633	616.3	0.03075	0.01285	0.01214	0.01312
616.2	-0.49631	0.43978	0.51142	1.26614	616.2	0.03081	0.01287	0.01215	0.01318
616.1	-0.18405	0.40231	0.12443	1.34286	616.1	0.03083	0.01289	0.01215	0.01318
616	-0.43546	-0.03325	-0.11776	1.27747	616	0.03085	0.01292	0.01216	0.01317
615.9	-1.20143	-0.22543	0.09408	1.55648	615.9	0.03088	0.01294	0.01216	0.01317
615.8	-1.75423	0.00473	0.06878	0.89879	615.8	0.03092	0.01295	0.01216	0.01316
615.7	-2.19308	0.11675	-0.00706	0.76445	615.7	0.03095	0.01298	0.01219	0.01321
615.6	-1.71831	0.37111	0.13046	0.99628	615.6	0.03101	0.01299	0.01224	0.0132
615.5	-2.08882	0.7843	-0.12306	1.30522	615.5	0.03103	0.01304	0.01228	0.01321
615.4	-2.5202	0.98924	0.16468	1.41574	615.4	0.0311	0.01307	0.01225	0.0132
615.3	-1.20185	1.31189	0.24434	1.57794	615.3	0.03116	0.0131	0.01228	0.01323
615.2	-0.67447	1.36688	-0.07882	1.98344	615.2	0.03119	0.01316	0.01227	0.01324
615.1	-0.58531	1.43148	0.05529	2.14823	615.1	0.03121	0.01318	0.01227	0.01327
615	-0.42085	1.23657	-0.000233536	2.28223	615	0.03125	0.0132	0.01228	0.01327
614.9	0.55749	1.39378	0.09937	2.53137	614.9	0.0313	0.01322	0.01232	0.01329
614.8	1.43132	1.66519	0.32618	2.67999	614.8	0.03135	0.01324	0.01235	0.01332
614.7	1.18464	1.73148	0.26331	2.69396	614.7	0.03142	0.01324	0.01235	0.01335
614.6	1.14007	1.81331	0.12025	2.8922	614.6	0.03146	0.01327	0.01235	0.01338
614.5	0.9389	1.9821	-0.17508	2.78963	614.5	0.03148	0.01331	0.01234	0.01342
614.4	1.19058	1.82504	-0.26195	2.44587	614.4	0.03151	0.01334	0.01236	0.01341
614.3	0.61439	1.76407	-0.70156	1.88759	614.3	0.03158	0.0134	0.0124	0.01339
614.2	0.00255	2.01674	-0.90063	2.52238	614.2	0.03165	0.01341	0.01239	0.01338
614.1	0.24255	2.0123	-1.14208	2.2852	614.1	0.0317	0.01342	0.01242	0.0134
614	1.23562	2.23811	-0.96392	2.50095	614	0.03174	0.01348	0.01247	0.01344
613.9	0.92704	2.15823	-0.52775	2.7572	613.9	0.03183	0.01353	0.01248	0.01346
613.8	0.67861	1.91392	-0.51993	2.40204	613.8	0.03188	0.01357	0.0125	0.01343
613.7	0.86996	1.73517	-0.18151	2.48405	613.7	0.03199	0.01358	0.01252	0.01343
613.6	0.97596	1.22453	-0.13098	2.71887	613.6	0.032	0.01359	0.01254	0.01343
613.5	0.17902	0.91067	0.12301	2.55468	613.5	0.03204	0.01362	0.01252	0.01345
613.4	0.03847	0.54822	-0.28918	2.24959	613.4	0.03206	0.01366	0.01253	0.01352
613.3	0.20857	0.50126	-0.70118	2.0844	613.3	0.03213	0.01363	0.01255	0.01356
613.2	0.08455	0.48589	-0.89713	1.97174	613.2	0.03216	0.01366	0.01258	0.01355
613.1	1.12976	0.47282	-1.24341	2.0614	613.1	0.03221	0.01371	0.01261	0.01357
613	0.84873	0.75653	-0.83182	1.5715	613	0.03224	0.01372	0.01264	0.0136
612.9	0.34361	0.61369	-0.71743	1.34696	612.9	0.03229	0.01372	0.01269	0.01357
612.8	-0.49506	0.58224	-0.39363	1.66165	612.8	0.03232	0.01371	0.01274	0.0136
612.7	-0.87529	1.06699	-0.18387	1.91504	612.7	0.03238	0.01371	0.0128	0.01364
612.6	-0.63405	1.044	0.2794	1.87885	612.6	0.03241	0.01372	0.01278	0.01366
612.5	-0.15162	1.28082	0.12003	2.25543	612.5	0.03246	0.01373	0.01282	0.01367
612.4	0.42702	1.54885	0.03398	2.4549	612.4	0.03253	0.01373	0.01283	0.01369
612.3	0.42732	1.23525	-0.2892	2.70224	612.3	0.03259	0.01377	0.0128	0.01369
612.2	1.76926	1.19158	-0.54787	2.31401	612.2	0.03265	0.01376	0.01283	0.01372
612.1	1.80363	0.91648	-0.22481	2.16237	612.1	0.03271	0.01378	0.01283	0.01381
612	2.17225	0.76379	-0.16173	1.65335	612	0.03277	0.01382	0.01288	0.01382
611.9	1.4159	0.88519	-0.09422	1.57776	611.9	0.03281	0.01382	0.01289	0.01389
611.8	1.66718	0.93193	-0.00983	1.26684	611.8	0.03287	0.01385	0.01295	0.01389
611.7	1.27539	0.75538	-0.01533	1.24896	611.7	0.03293	0.01388	0.01297	0.01393
611.6	2.36006	0.72856	-0.31392	1.14322	611.6	0.03295	0.01385	0.01297	0.01392
611.5	1.2067	0.68381	-0.57338	1.01013	611.5	0.03298	0.01385	0.01298	0.01392
611.4	1.39109	0.63422	-0.30484	1.11646	611.4	0.03303	0.01386	0.01298	0.01398
611.3	1.3909	0.7151	-0.24784	1.33601	611.3	0.03303	0.01388	0.01299	0.01396
611.2	0.83881	0.56719	-0.29463	1.42034	611.2	0.03308	0.01389	0.01304	0.01397
611.1	0.68815	0.22418	-0.29	1.62966	611.1	0.03314	0.0139	0.01305	0.01398
611	-0.33545	-0.08728	-0.12479	2.13027	611	0.03321	0.01389	0.01308	0.01403
610.9	0.11215	-0.06928	0.54346	2.33073	610.9	0.03328	0.0139	0.01305	0.01408
610.8	0.38513	-0.09246	0.6472	1.79519	610.8	0.03331	0.01396	0.01308	0.01411
610.7	0.16457	0.30352	0.99727	2.02183	610.7	0.03333	0.01401	0.01308	0.01416
610.6	-0.54631	0.32785	0.66042	2.12762	610.6	0.03337	0.01403	0.01306	0.01417
610.5	-0.01998	0.40471	0.80557	2.21541	610.5	0.03341	0.01401	0.01309	0.01421
610.4	0.30895	0.90917	0.90699	2.67915	610.4	0.03346	0.01404	0.01308	0.01429
610.3	-0.06014	1.03315	0.91028	2.32938	610.3	0.03348	0.01408	0.0131	0.01428
610.2	-0.26093	1.14377	0.88519	2.13297	610.2	0.03356	0.01411	0.01312	0.0143
610.1	-0.20113	1.37096	0.6364	2.39682	610.1	0.03361	0.01413	0.01319	0.01433
610	-0.36142	1.26522	0.98839	2.45412	610	0.03366	0.01416	0.01324	0.01431
609.9	-0.13058	1.21808	1.26238	2.51487	609.9	0.0337	0.01422	0.01326	0.01432
609.8	-1.38843	0.8617	1.45203	2.52139	609.8	0.03376	0.01424	0.0133	0.01434
609.7	-2.17474	1.25772	1.60581	2.04695	609.7	0.0338	0.01428	0.01334	0.01436
609.6	-1.22449	1.40078	1.4267	2.37623	609.6	0.03387	0.01431	0.01335	0.01437
609.5	-0.24926	1.34157	1.74366	2.7018	609.5	0.03391	0.01435	0.01336	0.01445
609.4	0.52834	0.7738	1.55557	2.70298	609.4	0.03396	0.0144	0.01337	0.01449
609.3	1.92426	0.81186	1.04698	2.72367	609.3	0.03402	0.01443	0.01335	0.01454
609.2	1.69561	0.82245	0.74453	3.14991	609.2	0.03409	0.0145	0.01339	0.01459
609.1	1.73144	0.92377	1.09772	2.91896	609.1	0.0341	0.0145	0.01341	0.01463
609	0.46061	0.86098	1.61139	3.20672	609	0.03412	0.01453	0.01343	0.01466
608.9	0.66241	0.922	1.79973	3.37997	608.9	0.03415	0.01453	0.0135	0.01465
608.8	0.13522	1.06349	1.27832	3.43526	608.8	0.03417	0.01457	0.01349	0.01466
608.7	0.13819	1.05602	0.92144	3.44438	608.7	0.03419	0.0146	0.01351	0.01468
608.6	0.22171	1.17721	0.65822	3.38283	608.6	0.03425	0.0146	0.01353	0.01468
608.5	0.38702	0.98764	0.86899	3.23486	608.5	0.03433	0.01463	0.01356	0.01464
608.4	0.21555	1.39608	0.78897	3.65994	608.4	0.03441	0.01464	0.01354	0.01465
608.3	0.15122	1.74091	0.79908	3.35261	608.3	0.03447	0.01466	0.01358	0.01466
608.2	-0.50599	1.58664	0.85818	3.71757	608.2	0.03454	0.01473	0.01365	0.01469
608.1	0.12843	1.94243	0.96712	3.41839	608.1	0.0346	0.01477	0.01367	0.01471
608	0.10965	1.78738	0.87683	3.10283	608	0.03466	0.01479	0.01371	0.01472
607.9	0.50916	1.69416	0.96453	2.74303	607.9	0.03472	0.01481	0.0137	0.01473
607.8	0.83404	1.98095	1.18191	2.61987	607.8	0.03478	0.01481	0.01374	0.01477
607.7	2.47207	2.0681	0.94881	2.5141	607.7	0.03485	0.01485	0.01379	0.0148
607.6	3.50597	1.66935	0.34022	2.5303	607.6	0.03488	0.0149	0.01385	0.0148
607.5	3.9505	1.84891	0.26001	2.39061	607.5	0.03493	0.01489	0.01386	0.01484
607.4	3.82537	1.70692	-0.03555	1.90132	607.4	0.03495	0.01489	0.01387	0.01491
607.3	4.20189	1.57006	0.11642	1.87728	607.3	0.03501	0.01491	0.01387	0.01489
607.2	4.89858	1.34416	0.42317	1.68939	607.2	0.03503	0.01493	0.01392	0.0149
607.1	4.42797	1.09203	0.44915	1.63352	607.1	0.03507	0.01495	0.01397	0.01488
607	3.63662	1.39742	0.33413	1.9474	607	0.03512	0.01496	0.01399	0.01493
606.9	3.77623	1.48202	-0.01887	1.7416	606.9	0.03521	0.01498	0.01402	0.01495
606.8	5.18519	1.34079	-0.01529	1.93881	606.8	0.03527	0.01501	0.01403	0.01497
606.7	4.95498	1.41577	-0.06177	1.72695	606.7	0.03533	0.015	0.01403	0.01501
606.6	4.7008	1.66091	0.16783	2.21209	606.6	0.03541	0.01502	0.01401	0.01505
606.5	5.61161	1.58889	0.14637	2.40912	606.5	0.03545	0.01508	0.01402	0.01507
606.4	5.71692	1.03219	-0.08267	2.34068	606.4	0.0355	0.01509	0.01401	0.01504
606.3	5.4466	1.05168	0.24337	1.85931	606.3	0.03553	0.01512	0.01402	0.01507
606.2	4.68724	1.1325	-0.13624	1.8385	606.2	0.0356	0.01514	0.01403	0.01507
606.1	3.77716	1.32484	-0.10758	1.92815	606.1	0.03566	0.01512	0.01406	0.01507
606	4.11243	1.44451	0.20807	1.65879	606	0.03572	0.01515	0.0141	0.01506
605.9	4.18943	1.17855	0.35673	1.5099	605.9	0.03584	0.01515	0.01415	0.01507
605.8	4.34553	0.94479	0.01438	1.73997	605.8	0.03594	0.01519	0.01418	0.0151
605.7	5.56188	1.15984	-0.10307	1.30038	605.7	0.03604	0.01519	0.01415	0.01513
605.6	5.84561	0.99252	0.57864	0.94058	605.6	0.03611	0.01523	0.01419	0.01521
605.5	5.6077	1.21836	0.71516	0.98248	605.5	0.03618	0.01529	0.0142	0.01524
605.4	4.44114	1.06491	1.0613	0.83017	605.4	0.03621	0.01532	0.01423	0.01524
605.3	3.73561	1.23269	0.79288	0.86815	605.3	0.03622	0.01533	0.01424	0.01526
605.2	4.11501	1.51357	0.82715	0.79192	605.2	0.03627	0.01537	0.01428	0.01529
605.1	3.80776	1.29056	1.39096	1.09282	605.1	0.03632	0.01541	0.01431	0.01532
605	3.57553	0.83651	1.41093	0.9324	605	0.03637	0.01541	0.01431	0.01532
604.9	2.77396	1.11202	1.52285	1.23817	604.9	0.03648	0.01541	0.01433	0.0154
604.8	3.04348	0.9475	1.68745	1.02773	604.8	0.03654	0.01541	0.01436	0.01543
604.7	2.87607	1.12305	1.95059	1.32974	604.7	0.03658	0.01545	0.01437	0.01548
604.6	3.26359	1.04808	1.66478	1.85344	604.6	0.03662	0.01547	0.01437	0.01553
604.5	2.74603	1.13874	1.46555	1.79363	604.5	0.03669	0.01551	0.01436	0.01552
604.4	1.83015	1.13999	1.36119	1.73886	604.4	0.03677	0.0155	0.01438	0.01553
604.3	1.97778	1.50722	1.47539	1.65708	604.3	0.03684	0.01552	0.0144	0.01555
604.2	1.19784	1.56142	1.5702	2.01662	604.2	0.03691	0.01555	0.01442	0.01554
604.1	0.82473	1.2058	1.60671	2.49948	604.1	0.03694	0.01556	0.01444	0.0156
604	0.3289	0.88715	1.91904	2.52393	604	0.03697	0.01558	0.01446	0.01562
603.9	0.94096	0.87446	1.64616	2.39009	603.9	0.03702	0.01558	0.0145	0.01565
603.8	0.93769	0.75044	1.62172	2.56578	603.8	0.03705	0.0156	0.01448	0.01566
603.7	0.6655	0.85372	2.09197	3.08766	603.7	0.03707	0.01563	0.01449	0.01566
603.6	1.1162	0.82272	2.32356	3.15639	603.6	0.03716	0.01564	0.01453	0.01568
603.5	1.83651	1.01507	2.34748	3.57419	603.5	0.03726	0.01568	0.01458	0.01572
603.4	1.55908	0.89135	2.47358	3.06354	603.4	0.03727	0.01569	0.01463	0.01573
603.3	2.07228	0.83931	2.56738	3.18554	603.3	0.03738	0.01569	0.01466	0.01576
603.2	1.48702	1.27471	2.56995	3.21322	603.2	0.03747	0.01572	0.01469	0.0158
603.1	0.84122	1.32741	2.84176	3.51913	603.1	0.03753	0.01575	0.01476	0.01577
603	-0.15423	1.58923	2.81176	3.57397	603	0.03756	0.01574	0.01477	0.01575
602.9	0.50965	1.86436	2.96519	3.73862	602.9	0.03761	0.01579	0.01482	0.01578
602.8	0.69646	1.70157	2.65202	3.99222	602.8	0.03765	0.01578	0.01485	0.01582
602.7	1.02843	1.91039	2.67912	4.28094	602.7	0.03765	0.0158	0.01482	0.01582
602.6	1.18758	1.96242	2.73176	3.88491	602.6	0.03768	0.01583	0.01485	0.01583
602.5	1.6204	1.87862	2.77531	4.00466	602.5	0.03777	0.01591	0.01491	0.01586
602.4	1.01213	1.97834	2.48426	4.29198	602.4	0.03787	0.01593	0.01494	0.01589
602.3	1.49965	1.9328	2.5296	4.35184	602.3	0.03794	0.01595	0.01495	0.0159
602.2	1.64612	1.97714	2.73179	4.12147	602.2	0.03799	0.01594	0.015	0.01595
602.1	2.47438	1.42468	3.08485	4.08821	602.1	0.03813	0.01598	0.015	0.016
602	2.18826	1.28729	3.11774	4.31382	602	0.0382	0.01598	0.01507	0.01602
601.9	2.76446	0.99941	2.9753	4.28914	601.9	0.03825	0.01603	0.01509	0.01604
601.8	3.375	1.16561	2.6568	4.74301	601.8	0.03826	0.01607	0.01512	0.01605
601.7	3.81333	1.27975	2.49471	4.34024	601.7	0.0383	0.01611	0.01516	0.01604
601.6	4.36637	1.07717	2.6009	4.58811	601.6	0.03834	0.01614	0.01521	0.01606
601.5	4.55994	1.22898	2.35195	4.86252	601.5	0.03837	0.01617	0.01523	0.01606
601.4	4.23535	1.261	2.27927	4.31356	601.4	0.03842	0.01617	0.01527	0.01604
601.3	3.6696	1.45538	2.83182	4.08804	601.3	0.03849	0.01617	0.01534	0.01612
601.2	3.16643	1.25363	3.30432	4.31451	601.2	0.03856	0.01622	0.01536	0.01617
601.1	3.26869	1.15798	3.16665	4.34435	601.1	0.03862	0.01624	0.01541	0.01622
601	4.06467	1.2718	2.85325	4.56076	601	0.03872	0.01627	0.01543	0.01629
600.9	4.00559	1.44964	2.69053	4.527	600.9	0.03879	0.01628	0.01548	0.01631
600.8	2.98976	1.73315	2.51651	4.60284	600.8	0.03889	0.01638	0.01549	0.01631
600.7	3.83533	1.92466	2.20732	4.60551	600.7	0.03895	0.01639	0.01551	0.01636
600.6	3.5319	1.85299	2.27396	4.11393	600.6	0.03902	0.01643	0.01553	0.01638
600.5	3.94446	1.45464	1.9954	3.71863	600.5	0.03908	0.01646	0.01555	0.01641
600.4	2.92821	1.24146	1.82112	3.72726	600.4	0.0391	0.01652	0.01554	0.01642
600.3	2.61661	1.2438	1.89333	3.61353	600.3	0.03914	0.01661	0.01554	0.01644
600.2	2.73242	0.89751	1.80593	3.97659	600.2	0.03921	0.01663	0.0155	0.01648
600.1	3.36451	0.91784	1.8186	4.02564	600.1	0.03924	0.01667	0.01553	0.0165
600	2.55865	1.0514	1.56924	4.1319	600	0.03925	0.01668	0.01556	0.01656
599.9	2.90727	0.90926	1.11264	4.31595	599.9	0.03927	0.0167	0.01559	0.01664
599.8	3.73282	0.84745	1.42773	3.68508	599.8	0.03935	0.01675	0.01561	0.0167
599.7	3.40158	0.40467	1.4414	3.57676	599.7	0.03939	0.01677	0.01563	0.01674
599.6	2.30176	0.36566	1.59427	3.1803	599.6	0.0395	0.0168	0.01565	0.01674
599.5	1.42489	0.29633	1.33745	2.74346	599.5	0.03955	0.01685	0.01568	0.01676
599.4	1.30938	0.29208	1.15811	3.10609	599.4	0.03959	0.01689	0.01569	0.01677
599.3	0.76001	0.60546	0.88599	3.08641	599.3	0.0396	0.01691	0.01573	0.01676
599.2	1.57705	0.2448	1.10985	2.83543	599.2	0.03963	0.01695	0.01577	0.01682
599.1	1.34295	0.37262	0.72801	2.71743	599.1	0.03969	0.01697	0.01576	0.01681
599	1.33262	0.42151	0.33216	2.91215	599	0.03975	0.01704	0.01584	0.01684
598.9	1.0878	0.68112	0.06214	2.89491	598.9	0.03977	0.01707	0.01584	0.01687
598.8	0.78387	1.11778	0.24356	3.43154	598.8	0.0398	0.01714	0.01588	0.01692
598.7	0.95916	0.97789	0.03929	2.88387	598.7	0.03981	0.01717	0.0159	0.01697
598.6	-0.77234	0.90026	-0.04707	2.65831	598.6	0.0399	0.01718	0.01587	0.017
598.5	-0.71798	0.89025	0.47222	2.67114	598.5	0.04001	0.0172	0.01586	0.01706
598.4	-1.6922	1.0427	0.59545	2.92598	598.4	0.04011	0.01723	0.01588	0.0171
598.3	-0.99537	0.92742	0.79643	2.91465	598.3	0.04024	0.01728	0.01592	0.01711
598.2	-1.38976	1.24734	0.73402	2.86815	598.2	0.0403	0.01731	0.01596	0.01713
598.1	-0.15437	0.98103	0.47562	2.59973	598.1	0.04035	0.01737	0.01601	0.01713
598	-0.89721	0.98068	0.28899	2.86821	598	0.04038	0.01744	0.01597	0.01716
597.9	-0.2104	1.05433	0.3837	2.11405	597.9	0.04043	0.01746	0.016	0.01714
597.8	-0.61308	1.33107	0.35632	2.52608	597.8	0.04047	0.01748	0.01605	0.01714
597.7	-0.07906	1.2155	0.32584	2.78028	597.7	0.04051	0.01752	0.01606	0.01713
597.6	0.30025	1.1894	0.48483	2.76378	597.6	0.0406	0.01755	0.01609	0.01716
597.5	-0.04284	1.38925	0.38141	2.93172	597.5	0.04064	0.01757	0.0161	0.01715
597.4	-0.47586	1.4764	0.24781	3.10538	597.4	0.04073	0.01762	0.01614	0.01721
597.3	-0.31947	1.80877	-0.05053	3.12301	597.3	0.04081	0.01761	0.01618	0.01723
597.2	-0.673	1.85084	0.04269	3.17108	597.2	0.04087	0.01763	0.01618	0.01731
597.1	0.1368	2.12194	0.12988	3.61358	597.1	0.04096	0.01763	0.01621	0.01736
597	0.4048	2.13053	-0.07688	3.35648	597	0.04104	0.01762	0.01623	0.01736
596.9	-0.28122	2.10332	0.12241	3.45837	596.9	0.04112	0.01764	0.01629	0.01739
596.8	-0.72704	1.74201	-0.10035	3.75116	596.8	0.04118	0.01765	0.01631	0.0174
596.7	0.04813	1.38753	0.17977	3.79905	596.7	0.04132	0.0177	0.01635	0.01739
596.6	1.34576	1.25402	0.24292	3.85728	596.6	0.04141	0.01773	0.01638	0.0174
596.5	0.83961	1.36482	0.36513	4.2403	596.5	0.04146	0.01776	0.01642	0.01746
596.4	1.6562	1.03028	-0.01923	4.41606	596.4	0.04154	0.01778	0.01644	0.01749
596.3	2.05672	1.33186	0.17048	4.63088	596.3	0.04159	0.01784	0.01651	0.01754
596.2	2.82377	1.40477	0.59725	4.20018	596.2	0.04166	0.01785	0.01651	0.0176
596.1	1.89135	1.1577	0.69196	4.09096	596.1	0.04172	0.01789	0.01657	0.01768
596	1.86076	0.97994	0.58759	3.80287	596	0.04186	0.01792	0.0166	0.01776
595.9	1.32252	1.15959	0.62067	3.87101	595.9	0.04192	0.01792	0.01664	0.01779
595.8	2.42151	0.8669	0.73427	3.99317	595.8	0.04197	0.01794	0.01665	0.01785
595.7	1.98016	0.5212	1.12295	3.95064	595.7	0.04207	0.01797	0.01667	0.01785
595.6	2.36581	0.33333	1.09181	3.37528	595.6	0.04215	0.01798	0.01673	0.0179
595.5	1.85061	0.06184	1.19928	2.91067	595.5	0.04227	0.018	0.01673	0.01796
595.4	2.23116	0.1766	1.13125	3.3075	595.4	0.04236	0.01804	0.01673	0.01795
595.3	2.61582	0.45563	1.2583	3.63582	595.3	0.04243	0.01808	0.01679	0.01797
595.2	3.84768	0.26355	1.25393	3.68177	595.2	0.04247	0.01811	0.01686	0.018
595.1	3.9067	0.14713	1.42769	3.64973	595.1	0.04253	0.01816	0.01686	0.018
595	3.4833	0.07028	1.09824	3.5473	595	0.04256	0.01819	0.01689	0.01808
594.9	3.94028	0.03088	1.11026	3.75961	594.9	0.04266	0.01823	0.01692	0.01815
594.8	4.68668	-0.1964	1.22409	4.16994	594.8	0.0427	0.01823	0.01693	0.01818
594.7	5.24409	-0.12572	1.49681	4.28859	594.7	0.0428	0.01826	0.01702	0.0182
594.6	4.7239	-0.06515	1.3713	4.41217	594.6	0.04289	0.01829	0.01706	0.01826
594.5	4.41159	-0.21805	1.83714	3.983	594.5	0.04298	0.01833	0.01706	0.0183
594.4	3.85237	-0.33203	2.02604	3.95671	594.4	0.04308	0.01838	0.0171	0.01838
594.3	3.37143	-0.31168	1.90169	3.65582	594.3	0.04317	0.01838	0.01713	0.01841
594.2	3.19673	-0.53029	1.78307	3.74687	594.2	0.04325	0.01842	0.01721	0.01843
594.1	2.95842	-0.64041	1.47128	4.21363	594.1	0.04335	0.01842	0.01725	0.01842
594	3.07993	-0.84389	1.65355	4.57568	594	0.04341	0.01847	0.01728	0.01847
593.9	3.62157	-0.67118	1.69901	4.32041	593.9	0.04351	0.01852	0.01732	0.0185
593.8	3.54149	-0.76501	1.75005	3.94453	593.8	0.04353	0.01857	0.01737	0.01851
593.7	2.68894	-0.47625	1.80244	4.13875	593.7	0.04355	0.01855	0.01743	0.01856
593.6	3.44076	-0.25053	1.6436	3.80986	593.6	0.04358	0.01862	0.01748	0.0186
593.5	2.92075	-0.15067	1.16515	3.60038	593.5	0.04366	0.01868	0.01748	0.01864
593.4	2.44414	0.04578	1.16174	3.54339	593.4	0.04367	0.01868	0.01751	0.01871
593.3	1.74387	-0.12602	1.32595	3.70278	593.3	0.04372	0.01872	0.01754	0.01873
593.2	1.41084	-0.03086	0.8897	3.61248	593.2	0.04381	0.01875	0.01758	0.01872
593.1	1.85448	0.40158	1.24789	3.5761	593.1	0.0439	0.01879	0.01758	0.01875
593	0.92295	0.21494	1.10782	3.54002	593	0.044	0.01881	0.01758	0.01876
592.9	1.54639	0.10995	0.57696	4.2926	592.9	0.04408	0.01885	0.01759	0.01876
592.8	3.07962	0.11502	0.84393	4.50338	592.8	0.04418	0.01886	0.01761	0.01877
592.7	3.28582	0.15269	0.61358	4.51507	592.7	0.04425	0.01886	0.01763	0.01879
592.6	4.20445	0.10671	0.49783	4.71924	592.6	0.04432	0.01887	0.01764	0.01882
592.5	2.71675	0.23706	0.67919	4.58251	592.5	0.0444	0.01889	0.01769	0.01886
592.4	2.47849	0.17024	0.80039	4.58018	592.4	0.04447	0.01893	0.01772	0.01891
592.3	3.24478	0.3391	0.65114	4.9512	592.3	0.0445	0.01898	0.0177	0.01892
592.2	2.90646	0.32213	0.65014	5.27876	592.2	0.04456	0.01901	0.01771	0.01893
592.1	3.20748	0.10502	0.15868	5.10839	592.1	0.0446	0.01902	0.01776	0.01893
592	3.25831	0.36773	0.12298	5.07575	592	0.04465	0.01901	0.01776	0.01896
591.9	2.93326	0.61425	0.13009	4.99661	591.9	0.04474	0.01904	0.01778	0.01898
591.8	1.90469	0.45971	-0.2062	4.77207	591.8	0.04478	0.01907	0.01787	0.01903
591.7	1.46249	0.15932	-0.18676	4.90169	591.7	0.04487	0.0191	0.0179	0.0191
591.6	0.74257	-0.02969	-0.2671	4.51049	591.6	0.04492	0.01914	0.01793	0.01907
591.5	-0.44988	-0.22336	-0.50988	4.48478	591.5	0.04504	0.01916	0.01793	0.01909
591.4	-0.30444	-0.41638	-1.12217	4.47664	591.4	0.04517	0.0192	0.01793	0.01911
591.3	-0.08139	0.00843	-1.12356	4.51956	591.3	0.04526	0.01923	0.01793	0.01918
591.2	0.24652	-0.11445	-1.36231	5.10419	591.2	0.04536	0.01927	0.01795	0.01919
591.1	-0.01679	0.09051	-1.36596	5.13805	591.1	0.04544	0.01928	0.01802	0.01921
591	-0.15608	-0.26533	-0.96177	5.39257	591	0.0455	0.01931	0.01802	0.01926
590.9	0.34127	-0.30409	-0.91118	5.25455	590.9	0.04553	0.01934	0.01802	0.0193
590.8	-0.34244	-0.36177	-0.60355	5.37396	590.8	0.04562	0.0194	0.01803	0.01937
590.7	0.09639	-0.33772	-0.56763	5.20791	590.7	0.04566	0.01946	0.01807	0.01941
590.6	-0.58907	-0.36291	-0.74401	5.48805	590.6	0.04572	0.01948	0.01814	0.01946
590.5	-1.26663	-0.67122	-0.65612	5.60287	590.5	0.04579	0.01954	0.0182	0.01949
590.4	0.06633	-0.50457	-0.61755	5.57856	590.4	0.0459	0.01965	0.01823	0.01951
590.3	0.81525	-0.57776	-0.54786	5.82518	590.3	0.04604	0.01965	0.01824	0.01951
590.2	0.95584	-0.31711	-0.43491	5.51212	590.2	0.04617	0.0197	0.01829	0.01958
590.1	1.16011	-0.45329	-0.44101	5.70391	590.1	0.04634	0.01973	0.01827	0.01957
590	0.77983	-0.45374	-0.78871	5.51478	590	0.04647	0.01974	0.0183	0.01957
589.9	1.95808	-0.12445	-0.90223	5.15621	589.9	0.04656	0.01977	0.01829	0.01963
589.8	1.63801	-0.63803	-0.95517	4.70158	589.8	0.04662	0.0198	0.01832	0.01968
589.7	1.35856	-0.79772	-0.79112	4.46746	589.7	0.04666	0.01984	0.01836	0.01971
589.6	1.34075	-0.56227	-0.68759	4.185	589.6	0.04673	0.01989	0.01841	0.01974
589.5	-0.31081	-0.41982	-0.9497	4.5889	589.5	0.04678	0.01996	0.01846	0.01979
589.4	-0.89548	-0.58171	-0.79483	4.12137	589.4	0.04679	0.02001	0.0185	0.01978
589.3	-2.20753	-0.74202	-0.86965	4.55393	589.3	0.0468	0.02006	0.01853	0.01983
589.2	-1.23997	-0.9912	-0.98976	4.61196	589.2	0.04685	0.02015	0.01856	0.0198
589.1	-1.62997	-0.78428	-1.29889	4.66459	589.1	0.04692	0.02017	0.0186	0.01981
589	-1.65153	-0.92808	-1.14811	5.13697	589	0.04702	0.02019	0.01864	0.01986
588.9	-0.45605	-0.89916	-0.88476	4.68917	588.9	0.04712	0.02021	0.01868	0.01989
588.8	-0.13339	-0.78666	-0.82202	4.41319	588.8	0.04725	0.02025	0.01874	0.01993
588.7	0.04479	-0.89595	-0.98766	4.67262	588.7	0.04738	0.02029	0.01882	0.01999
588.6	-1.75784	-0.62782	-0.85388	4.95632	588.6	0.04748	0.02033	0.01881	0.02001
588.5	-0.53818	0.07494	-0.75469	4.66148	588.5	0.04756	0.02037	0.01882	0.02002
588.4	-0.74334	0.63318	-0.87978	4.57024	588.4	0.04765	0.0204	0.01887	0.02005
588.3	-0.10456	0.79278	-0.49622	4.8358	588.3	0.04771	0.02046	0.01888	0.02007
588.2	0.06158	0.4604	-0.05485	4.49229	588.2	0.04776	0.0205	0.01894	0.02008
588.1	-0.21493	1.31437	0.62413	4.65557	588.1	0.04776	0.02055	0.01901	0.02013
588	-0.25124	0.88134	0.76326	4.49653	588	0.04781	0.0206	0.01907	0.02012
587.9	-0.90055	0.69235	0.65969	4.48651	587.9	0.04787	0.02062	0.01913	0.02015
587.8	-0.09059	0.4462	0.12205	4.49122	587.8	0.04795	0.02071	0.01915	0.02017
587.7	-0.03921	1.17947	0.65785	4.26723	587.7	0.04806	0.02074	0.01922	0.02017
587.6	-0.63462	0.93044	0.01014	3.77249	587.6	0.04818	0.02078	0.01926	0.02016
587.5	-1.52477	1.28147	0.21225	3.30589	587.5	0.04828	0.02082	0.01931	0.0202
587.4	-1.1439	0.96016	0.07401	3.59137	587.4	0.04844	0.02087	0.01936	0.02018
587.3	-1.27232	1.12791	0.26581	3.55989	587.3	0.04856	0.02091	0.01937	0.02018
587.2	-1.83817	1.68549	0.0047	3.39162	587.2	0.04871	0.02093	0.0194	0.0202
587.1	-2.62693	0.96736	-0.33677	3.20549	587.1	0.04879	0.02097	0.01939	0.02025
587	-3.60138	1.22278	-0.31095	2.75864	587	0.04882	0.02101	0.01941	0.02032
586.9	-3.55633	1.20621	0.17323	3.03463	586.9	0.04886	0.02103	0.01942	0.02033
586.8	-3.16874	1.14863	0.59412	2.78534	586.8	0.0489	0.02107	0.01947	0.02041
586.7	-2.81326	0.99937	0.83422	3.00301	586.7	0.04891	0.02113	0.0195	0.02046
586.6	-3.75296	1.00686	0.9748	3.04695	586.6	0.04895	0.02117	0.01958	0.0205
586.5	-3.83323	1.02155	0.83149	3.24394	586.5	0.04904	0.02119	0.01963	0.02052
586.4	-4.02845	1.32229	0.2856	3.52709	586.4	0.04911	0.02124	0.01967	0.02055
586.3	-3.52299	1.51446	0.6726	3.46463	586.3	0.0492	0.02126	0.01969	0.02057
586.2	-3.07003	1.71144	0.5902	3.33974	586.2	0.04932	0.02126	0.01974	0.02058
586.1	-3.3466	2.24023	0.58631	3.35598	586.1	0.04947	0.02126	0.01976	0.02059
586	-2.55165	2.44918	0.78085	3.39148	586	0.04963	0.02132	0.01976	0.02062
585.9	-3.27535	2.7942	1.31933	3.23879	585.9	0.04981	0.02131	0.0198	0.0207
585.8	-3.22442	2.68105	1.29422	3.02454	585.8	0.04988	0.02136	0.01982	0.02071
585.7	-4.78372	2.46919	1.28574	2.80989	585.7	0.04999	0.02138	0.01988	0.02075
585.6	-5.59216	2.64299	0.69461	2.56316	585.6	0.05009	0.02145	0.01992	0.02079
585.5	-5.13005	2.30203	1.09452	2.67982	585.5	0.05014	0.02154	0.01993	0.02082
585.4	-5.65659	2.10821	1.11812	2.42836	585.4	0.05017	0.0216	0.01993	0.02084
585.3	-3.76487	1.84078	1.36752	1.78144	585.3	0.05021	0.02164	0.01997	0.0209
585.2	-5.3167	1.71241	1.22453	2.02787	585.2	0.05026	0.0217	0.01999	0.02093
585.1	-5.15292	1.46558	1.4168	2.32182	585.1	0.0503	0.02178	0.02001	0.02096
585	-6.44336	1.36073	1.33106	2.21766	585	0.05036	0.02182	0.02005	0.02102
584.9	-5.93743	1.45284	1.21197	2.64294	584.9	0.05042	0.02184	0.0201	0.02107
584.8	-6.32053	0.92439	0.80511	2.77956	584.8	0.05055	0.02182	0.02013	0.02109
584.7	-6.04287	0.922	0.60723	2.8965	584.7	0.05068	0.02187	0.02013	0.02114
584.6	-5.73861	0.68786	0.67371	3.06684	584.6	0.05083	0.02192	0.02015	0.02114
584.5	-5.08124	0.68755	0.47496	3.07271	584.5	0.05093	0.02196	0.02019	0.02122
584.4	-4.75654	0.69173	0.3074	3.05049	584.4	0.05104	0.02201	0.02027	0.02125
584.3	-4.2637	0.60433	0.57203	2.78339	584.3	0.0511	0.02206	0.0203	0.02133
584.2	-3.71045	0.63439	0.7286	2.88405	584.2	0.05115	0.0221	0.02032	0.02137
584.1	-5.12642	0.59798	1.01986	2.42944	584.1	0.05123	0.0221	0.02033	0.02139
584	-4.77905	0.72592	0.83999	2.54701	584	0.05124	0.02212	0.02037	0.02143
583.9	-3.31219	0.74472	1.26815	2.34474	583.9	0.05129	0.02218	0.02043	0.02147
583.8	-3.87328	0.9223	1.14917	2.61496	583.8	0.05136	0.02219	0.02044	0.02148
583.7	-4.38617	1.20433	0.97516	3.03557	583.7	0.05144	0.02223	0.0205	0.02148
583.6	-5.03835	1.01896	1.05725	3.22541	583.6	0.05153	0.02228	0.02053	0.0215
583.5	-4.95451	1.22546	0.95606	3.26291	583.5	0.0516	0.02233	0.0206	0.02148
583.4	-6.91839	1.45527	0.63974	3.49419	583.4	0.05174	0.02236	0.02062	0.02153
583.3	-6.81986	1.46834	0.65757	3.68811	583.3	0.05188	0.02242	0.02065	0.02154
583.2	-6.33666	1.08487	0.76277	4.13151	583.2	0.05204	0.02248	0.02068	0.02155
583.1	-6.49921	1.0748	1.07807	4.22944	583.1	0.05222	0.02253	0.02072	0.02161
583	-6.07027	0.81724	0.98529	4.51484	583	0.05233	0.02258	0.02081	0.02166
582.9	-5.70793	0.74267	1.04713	4.76143	582.9	0.05241	0.02264	0.02084	0.02171
582.8	-6.99396	0.4474	0.97623	4.50559	582.8	0.05247	0.02271	0.02091	0.02172
582.7	-6.03064	0.7561	1.29988	4.24659	582.7	0.05251	0.02274	0.02095	0.02177
582.6	-5.69303	0.28496	1.05137	4.44486	582.6	0.0525	0.02276	0.02101	0.02179
582.5	-5.10228	-0.06094	1.06909	4.79128	582.5	0.05254	0.02283	0.02105	0.02185
582.4	-5.7604	0.03734	1.15067	4.91012	582.4	0.05264	0.02291	0.02105	0.02193
582.3	-5.34651	0.21825	1.57978	5.62986	582.3	0.05271	0.02292	0.02108	0.02195
582.2	-5.44026	-0.22019	1.31371	5.65655	582.2	0.05283	0.02294	0.0211	0.02198
582.1	-5.18689	-0.09895	1.40357	5.92396	582.1	0.05296	0.02296	0.02113	0.02203
582	-6.1275	-0.10516	1.05473	6.68912	582	0.05313	0.02303	0.02117	0.02209
581.9	-5.3434	0.24015	0.78296	6.60622	581.9	0.05331	0.02305	0.02126	0.02213
581.8	-4.86749	0.00823	0.49242	6.52999	581.8	0.05351	0.02306	0.02133	0.02216
581.7	-4.32241	0.05032	0.15216	6.58262	581.7	0.05363	0.02306	0.02138	0.02219
581.6	-3.48954	0.52781	0.35721	6.83054	581.6	0.05379	0.02311	0.02142	0.02222
581.5	-2.35203	0.80633	0.49892	6.18482	581.5	0.05383	0.02319	0.02147	0.0223
581.4	-3.1336	0.87629	0.22863	5.91402	581.4	0.05387	0.02323	0.02155	0.02235
581.3	-1.90581	1.3262	0.74406	5.47801	581.3	0.05385	0.02323	0.02157	0.02237
581.2	-2.9494	1.64435	0.99379	5.12381	581.2	0.05389	0.02329	0.0216	0.02239
581.1	-3.85602	1.40791	0.96757	5.36397	581.1	0.05393	0.02334	0.02163	0.02242
581	-3.32624	1.30214	1.16354	5.66552	581	0.054	0.0234	0.02165	0.02242
580.9	-3.17469	1.21752	0.90445	6.59859	580.9	0.05413	0.02344	0.02167	0.02241
580.8	-2.59131	1.47487	1.01424	6.93002	580.8	0.05422	0.02353	0.02171	0.02247
580.7	-2.85509	1.10116	1.096	6.30021	580.7	0.05435	0.02356	0.02174	0.02252
580.6	-2.48544	0.71161	1.0086	6.18511	580.6	0.0545	0.02363	0.02177	0.02258
580.5	-2.29403	1.26692	1.13333	6.10144	580.5	0.05463	0.02368	0.02184	0.02262
580.4	-1.75847	0.98953	1.07729	5.3638	580.4	0.05475	0.02368	0.0219	0.02271
580.3	-1.63746	1.05696	1.28714	5.29416	580.3	0.05483	0.02374	0.02194	0.02274
580.2	-0.93013	0.91565	1.41855	4.92877	580.2	0.05488	0.02376	0.022	0.02282
580.1	-0.99977	1.11744	1.84181	5.00558	580.1	0.05491	0.0238	0.02206	0.02287
580	0.00133	0.72405	1.89103	5.1601	580	0.05496	0.02382	0.0221	0.0229
579.9	0.00754	0.23161	1.74554	5.38957	579.9	0.05496	0.02387	0.02215	0.02295
579.8	0.79035	0.19185	1.51428	5.27	579.8	0.05499	0.0239	0.02219	0.023
579.7	0.97493	-0.03707	1.96751	5.15306	579.7	0.05501	0.02395	0.02222	0.02304
579.6	0.9508	0.37432	1.45817	5.14794	579.6	0.05513	0.024	0.02225	0.02306
579.5	2.13244	-0.34853	1.59227	5.07832	579.5	0.05525	0.02407	0.02227	0.02316
579.4	2.29093	0.09778	1.83702	4.39105	579.4	0.05538	0.02414	0.02228	0.02318
579.3	1.36597	0.04466	1.96477	4.22056	579.3	0.05552	0.02422	0.02227	0.02326
579.2	0.88035	-0.1987	1.60776	4.40535	579.2	0.05567	0.02426	0.02231	0.0233
579.1	1.03535	0.20471	1.47622	4.37772	579.1	0.05581	0.02429	0.02235	0.02332
579	1.04891	0.39212	0.87702	3.95358	579	0.05591	0.02434	0.02241	0.02334
578.9	1.14985	0.49063	1.24417	3.76816	578.9	0.05597	0.02438	0.02245	0.02342
578.8	0.52025	0.57363	0.91222	3.47847	578.8	0.05603	0.02442	0.02253	0.02345
578.7	0.33918	0.6006	0.67871	3.2022	578.7	0.05603	0.02444	0.02264	0.02349
578.6	0.20477	0.31476	0.605	3.06738	578.6	0.05608	0.02449	0.02266	0.02356
578.5	0.45662	0.02035	0.96937	3.36723	578.5	0.0561	0.02455	0.02267	0.02359
578.4	0.79268	-0.26068	0.57162	3.31269	578.4	0.05618	0.02459	0.02268	0.02365
578.3	0.33822	-0.54373	0.28056	2.85903	578.3	0.05626	0.02462	0.02272	0.02372
578.2	-1.37639	-0.48879	0.44893	3.45158	578.2	0.05638	0.02469	0.02272	0.02372
578.1	-1.31078	0.28069	1.01012	3.39577	578.1	0.05651	0.02474	0.02271	0.02376
578	-3.95897	-0.08851	0.73577	3.99568	578	0.05665	0.0248	0.02279	0.02382
577.9	-3.99225	-0.15405	0.80307	4.37014	577.9	0.05682	0.02484	0.02283	0.02387
577.8	-3.64968	0.09949	0.73883	4.44796	577.8	0.05696	0.02489	0.02287	0.0239
577.7	-4.11774	-0.12564	0.56583	4.10023	577.7	0.05709	0.0249	0.02288	0.02394
577.6	-3.78559	-0.63897	1.06373	3.62675	577.6	0.05715	0.02494	0.02295	0.02398
577.5	-5.479	-1.08727	1.22133	3.58291	577.5	0.05723	0.02497	0.02302	0.02403
577.4	-5.0143	-1.07284	0.85846	4.42528	577.4	0.0573	0.02503	0.0231	0.02402
577.3	-5.72349	-0.82614	1.06483	4.77092	577.3	0.05734	0.02506	0.02313	0.02402
577.2	-6.50922	-1.31909	1.79569	5.24801	577.2	0.05741	0.0251	0.0232	0.02402
577.1	-6.07771	-1.64958	1.8458	5.36548	577.1	0.05751	0.02519	0.02324	0.02405
577	-5.54574	-1.35412	1.49175	4.95256	577	0.05761	0.02522	0.0233	0.02406
576.9	-6.12822	-1.34139	1.2537	5.23165	576.9	0.05774	0.02527	0.02332	0.02411
576.8	-5.45619	-1.08349	0.96556	5.22074	576.8	0.05788	0.02533	0.02338	0.02416
576.7	-6.50416	-0.69061	0.84236	5.31993	576.7	0.05801	0.02536	0.02345	0.02419
576.6	-6.82754	-0.62095	0.97759	5.38848	576.6	0.05815	0.02544	0.02346	0.02424
576.5	-7.64165	-0.74056	0.51553	5.31535	576.5	0.05831	0.02546	0.02351	0.02428
576.4	-8.40579	-0.94207	0.5171	5.17942	576.4	0.05847	0.02552	0.02355	0.02431
576.3	-8.75279	-1.09082	0.99524	5.35757	576.3	0.05856	0.02559	0.02359	0.02434
576.2	-9.94092	-0.60232	0.231	5.81533	576.2	0.05866	0.02563	0.02364	0.02437
576.1	-9.86496	-0.68081	0.21215	6.76088	576.1	0.05879	0.0257	0.02374	0.02441
576	-8.98898	-0.85823	-0.14468	6.78653	576	0.05884	0.02575	0.02381	0.02442
575.9	-9.95782	-1.51717	0.04245	6.57126	575.9	0.05891	0.02576	0.02391	0.02444
575.8	-10.0648	-1.05287	0.96425	6.98421	575.8	0.05896	0.02579	0.02396	0.02448
575.7	-9.56001	-1.56045	1.49537	7.40745	575.7	0.05905	0.02583	0.02399	0.02454
575.6	-10.575	-1.27402	1.72744	7.84369	575.6	0.05913	0.02587	0.02405	0.02455
575.5	-9.30136	-1.34009	1.91057	8.37951	575.5	0.05924	0.02595	0.02405	0.02458
575.4	-8.80333	-1.28324	1.9847	8.42913	575.4	0.05937	0.02603	0.02405	0.02459
575.3	-9.23366	-0.69685	2.26025	8.89403	575.3	0.05951	0.02607	0.02412	0.02458
575.2	-9.34669	-0.6228	2.55926	8.79818	575.2	0.05956	0.02613	0.02415	0.02462
575.1	-9.84441	-0.2308	2.35514	8.92557	575.1	0.05961	0.02614	0.02421	0.02462
575	-9.0252	-0.7673	2.4432	8.78188	575	0.05972	0.02625	0.02427	0.02466
574.9	-8.44121	-0.91607	2.17089	8.68148	574.9	0.05983	0.0263	0.02431	0.02466
574.8	-6.46737	-1.62535	1.5969	8.969	574.8	0.05993	0.02633	0.02438	0.0247
574.7	-6.66746	-1.62418	1.2901	8.59396	574.7	0.06	0.02639	0.02444	0.02476
574.6	-6.93469	-2.21594	1.54799	7.98072	574.6	0.06009	0.0264	0.0245	0.02483
574.5	-7.45879	-1.90081	1.43223	8.39359	574.5	0.06026	0.02646	0.02457	0.02489
574.4	-7.47557	-1.46876	1.53555	8.18151	574.4	0.06037	0.02654	0.02462	0.02494
574.3	-6.35908	-1.03639	1.55161	8.10833	574.3	0.06049	0.02655	0.02465	0.02502
574.2	-5.12709	-1.24681	1.52515	7.91071	574.2	0.0606	0.02658	0.02468	0.02506
574.1	-5.42243	-1.44196	1.13065	7.75624	574.1	0.06067	0.0266	0.0247	0.02516
574	-4.10141	-1.5639	1.20437	7.68177	574	0.06076	0.02664	0.02472	0.02525
573.9	-2.67925	-1.22234	0.61301	7.86644	573.9	0.06087	0.02671	0.02476	0.02533
573.8	-3.91598	-0.92463	0.71138	8.40286	573.8	0.06101	0.02672	0.02481	0.02535
573.7	-3.07773	-0.80397	0.81492	8.67314	573.7	0.06114	0.02678	0.02481	0.02538
573.6	-2.19311	-0.96799	1.1963	8.83615	573.6	0.06127	0.02682	0.02487	0.02539
573.5	-2.38772	-0.54253	0.84844	8.67157	573.5	0.0614	0.02688	0.02491	0.02544
573.4	-1.86005	-0.48649	0.89595	8.13986	573.4	0.06148	0.02693	0.02494	0.02546
573.3	-1.79649	-0.17826	1.50918	7.72084	573.3	0.06158	0.02701	0.02502	0.02547
573.2	-2.31864	-0.01456	1.4495	7.77777	573.2	0.06166	0.02707	0.02509	0.02551
573.1	-1.58884	-0.35784	1.01006	8.16441	573.1	0.06176	0.0271	0.02513	0.02557
573	-2.62978	-0.27194	1.64973	7.78215	573	0.06182	0.02717	0.02519	0.02561
572.9	-3.07832	-0.48527	1.77622	7.53823	572.9	0.0619	0.02718	0.0252	0.02567
572.8	-3.27642	-0.16412	1.75033	7.16629	572.8	0.06203	0.02721	0.02526	0.02572
572.7	-3.5317	0.20072	1.62896	7.40645	572.7	0.06216	0.02725	0.02531	0.02577
572.6	-2.61639	0.52903	0.91661	7.22366	572.6	0.06228	0.0273	0.02531	0.02582
572.5	-2.65495	0.69285	0.48129	6.79714	572.5	0.0624	0.02734	0.02539	0.02585
572.4	-2.34034	0.9116	-0.14829	6.88115	572.4	0.06257	0.0274	0.02547	0.0259
572.3	-2.73259	1.19199	0.46816	6.46494	572.3	0.06269	0.02747	0.02551	0.02595
572.2	-3.10744	1.276	0.15643	6.33925	572.2	0.06278	0.02751	0.02557	0.02599
572.1	-2.91817	1.64279	0.0096	6.26997	572.1	0.06289	0.0276	0.02562	0.02606
572	-3.60766	2.2979	0.12681	6.49913	572	0.06304	0.02764	0.02567	0.02613
571.9	-3.43849	1.90195	0.04378	6.10859	571.9	0.0632	0.02772	0.02573	0.02619
571.8	-3.21549	1.67018	-0.23798	6.89313	571.8	0.06329	0.02775	0.0258	0.02624
571.7	-3.56613	1.32649	-0.4785	7.07047	571.7	0.06338	0.02776	0.02583	0.02628
571.6	-3.90569	2.30221	-0.45339	7.23033	571.6	0.06341	0.02782	0.02585	0.02634
571.5	-2.44336	3.17946	-0.64052	7.20485	571.5	0.06358	0.02784	0.02589	0.02635
571.4	-2.14539	4.0992	-1.04684	7.53994	571.4	0.06369	0.02792	0.0259	0.02635
571.3	-2.76484	3.97182	-1.19704	7.45233	571.3	0.06374	0.02798	0.02593	0.02641
571.2	-1.43949	3.59749	-1.77642	7.64158	571.2	0.06387	0.02804	0.02596	0.02645
571.1	-2.30285	3.35524	-1.94386	7.58473	571.1	0.06396	0.02809	0.02602	0.02648
571	-2.58652	3.54805	-1.84077	7.60881	571	0.06414	0.02812	0.026	0.02651
570.9	-1.64235	4.29573	-2.00556	7.38161	570.9	0.06431	0.02822	0.02604	0.02651
570.8	-1.63774	4.71063	-2.25268	8.02396	570.8	0.06443	0.02828	0.0261	0.02656
570.7	-2.07695	4.34779	-2.08372	8.1368	570.7	0.06456	0.02831	0.02616	0.02663
570.6	-2.24675	4.3734	-2.12119	7.43427	570.6	0.06468	0.0284	0.0262	0.02671
570.5	-1.89871	4.54123	-1.63981	7.52891	570.5	0.06482	0.02849	0.02625	0.02675
570.4	-2.86176	4.45308	-1.58689	6.85168	570.4	0.06492	0.02857	0.02628	0.02684
570.3	-2.6839	4.30142	-1.35881	6.76633	570.3	0.06501	0.02864	0.02631	0.02687
570.2	-2.43678	4.18248	-1.42064	7.44936	570.2	0.06509	0.02869	0.02639	0.02693
570.1	-1.60174	4.24352	-1.75161	7.97951	570.1	0.06513	0.02874	0.02642	0.02701
570	-0.23763	3.84322	-2.01213	7.75572	570	0.0652	0.02875	0.02643	0.02704
569.9	-1.42578	3.93858	-1.49515	7.50787	569.9	0.06528	0.02878	0.02646	0.02706
569.8	-0.91055	4.39161	-1.23648	7.7674	569.8	0.0654	0.02883	0.02651	0.02711
569.7	-0.02406	4.3414	-1.30706	7.48478	569.7	0.06554	0.02885	0.02656	0.02716
569.6	0.07701	4.66544	-1.38989	7.29021	569.6	0.06573	0.02893	0.0266	0.02719
569.5	-0.54882	4.58094	-1.48111	7.54479	569.5	0.06588	0.029	0.02665	0.02723
569.4	0.81471	4.72454	-1.29004	8.07137	569.4	0.06602	0.02904	0.0267	0.02727
569.3	0.07222	4.03323	-0.83972	8.46035	569.3	0.06612	0.02913	0.02681	0.02734
569.2	0.50045	3.93348	-0.83578	8.22469	569.2	0.06625	0.0292	0.02683	0.02741
569.1	1.91699	3.35282	-1.03792	8.30333	569.1	0.06634	0.02926	0.02687	0.02747
569	2.37425	3.36181	-1.05217	8.11914	569	0.06644	0.02928	0.02694	0.02753
568.9	1.5189	2.32161	-0.73605	7.90828	568.9	0.06652	0.02934	0.02702	0.02754
568.8	2.6477	1.87584	-0.35948	8.24115	568.8	0.06659	0.02936	0.02706	0.02757
568.7	2.40384	1.16174	-0.52513	7.96248	568.7	0.06666	0.02943	0.02713	0.02762
568.6	1.5411	1.28324	-0.39231	7.8903	568.6	0.06679	0.02951	0.02715	0.02765
568.5	0.97857	1.53101	0.21278	7.73916	568.5	0.06692	0.02963	0.0272	0.02771
568.4	0.77534	1.22012	0.43633	7.72612	568.4	0.06708	0.0297	0.0273	0.02776
568.3	0.4363	1.0254	0.78498	7.21422	568.3	0.0673	0.02974	0.02737	0.02783
568.2	-0.0069	0.68147	0.83245	7.33344	568.2	0.06742	0.02981	0.02744	0.02789
568.1	-1.58795	0.57942	0.93588	7.30425	568.1	0.06759	0.02988	0.02746	0.02792
568	-0.42801	-0.07193	0.92179	7.35791	568	0.06773	0.02993	0.02755	0.02798
567.9	-1.47274	-0.22134	1.02451	7.23408	567.9	0.06786	0.02997	0.0276	0.02801
567.8	-1.90804	-0.39325	1.15209	7.4414	567.8	0.068	0.03007	0.02763	0.02812
567.7	-2.90974	-0.52044	1.40824	7.66467	567.7	0.06807	0.03018	0.02772	0.0282
567.6	-4.06002	-1.01572	1.23154	7.89408	567.6	0.06813	0.03022	0.02779	0.02827
567.5	-3.88904	-1.58394	1.63553	6.94212	567.5	0.06819	0.03028	0.02788	0.02832
567.4	-5.05117	-1.88672	1.52845	6.40849	567.4	0.06828	0.03032	0.02796	0.02832
567.3	-4.79173	-1.36688	1.80057	6.69502	567.3	0.06835	0.03038	0.02798	0.02836
567.2	-5.11095	-1.89186	1.84958	6.57292	567.2	0.06843	0.03042	0.02803	0.0284
567.1	-4.98281	-1.96746	1.21346	6.42872	567.1	0.06855	0.03048	0.02813	0.02839
567	-4.20507	-1.90316	1.39458	5.9768	567	0.0687	0.03052	0.02818	0.02843
566.9	-5.05805	-2.36721	0.35261	6.30155	566.9	0.06888	0.03057	0.02823	0.0285
566.8	-5.96721	-1.86439	0.38203	6.10313	566.8	0.06906	0.0306	0.02829	0.02857
566.7	-7.01272	-2.60887	0.4181	5.67031	566.7	0.06925	0.03067	0.02837	0.02861
566.6	-7.41405	-2.47835	0.52963	6.44009	566.6	0.06942	0.03074	0.02843	0.0287
566.5	-7.36277	-2.73494	0.19497	6.42532	566.5	0.06952	0.03076	0.02847	0.02873
566.4	-7.94209	-2.93379	-0.71189	7.07046	566.4	0.06961	0.03081	0.02851	0.02879
566.3	-7.94462	-3.48604	-1.29034	7.29043	566.3	0.06967	0.03091	0.02857	0.02883
566.2	-7.45701	-3.20469	-1.53731	7.64191	566.2	0.06972	0.03099	0.02865	0.02886
566.1	-6.84299	-3.03817	-1.87085	7.25933	566.1	0.0698	0.03109	0.02871	0.02892
566	-6.42599	-2.82199	-2.11837	6.82534	566	0.0699	0.03117	0.02877	0.02897
565.9	-5.32004	-2.24561	-2.57397	6.57214	565.9	0.07003	0.03121	0.02882	0.02898
565.8	-6.06801	-1.91167	-2.32672	6.62773	565.8	0.07018	0.03129	0.02885	0.02903
565.7	-7.78549	-1.73386	-1.78727	6.37759	565.7	0.07033	0.03134	0.0289	0.02908
565.6	-8.1336	-1.56632	-2.64793	7.27821	565.6	0.07055	0.0314	0.02892	0.02912
565.5	-8.26847	-1.57386	-3.0703	7.04589	565.5	0.07078	0.03147	0.02895	0.02921
565.4	-9.98147	-1.20285	-3.3362	6.95154	565.4	0.07097	0.03155	0.02899	0.02927
565.3	-9.6836	-1.14514	-3.77136	7.29015	565.3	0.07114	0.03158	0.02902	0.02932
565.2	-8.73915	-1.43919	-3.83652	6.88456	565.2	0.07128	0.03165	0.02906	0.02936
565.1	-8.56697	-1.16597	-4.11114	6.32488	565.1	0.07142	0.03172	0.02911	0.0294
565	-8.3369	-1.12884	-3.63222	6.62705	565	0.07156	0.03179	0.02918	0.02944
564.9	-8.26973	-1.19641	-4.06461	6.6024	564.9	0.07169	0.03187	0.02923	0.02948
564.8	-7.45247	-1.23967	-4.18421	6.88201	564.8	0.07178	0.03192	0.02928	0.02957
564.7	-6.12445	-1.19099	-3.96499	6.82301	564.7	0.07184	0.03198	0.02937	0.02964
564.6	-6.82365	-0.93151	-3.97444	7.52281	564.6	0.07195	0.03205	0.02941	0.02967
564.5	-6.93903	-0.97602	-3.84686	7.0488	564.5	0.07202	0.03208	0.02951	0.0297
564.4	-6.73726	-1.57026	-3.7176	7.03465	564.4	0.0721	0.0321	0.02955	0.02971
564.3	-5.59631	-1.22152	-3.17381	6.72574	564.3	0.07218	0.03215	0.02959	0.02972
564.2	-4.81169	-0.96174	-3.54225	7.61467	564.2	0.07232	0.03222	0.02964	0.02978
564.1	-4.52614	-0.83809	-3.59514	7.86002	564.1	0.07253	0.03228	0.02969	0.02985
564	-4.30811	-1.00416	-4.34226	7.71334	564	0.0727	0.03235	0.02972	0.02991
563.9	-4.34893	-1.25723	-3.71986	8.17757	563.9	0.07288	0.03243	0.02981	0.03
563.8	-4.20489	-0.72469	-3.84907	8.29203	563.8	0.07307	0.0325	0.02989	0.03005
563.7	-3.3394	-1.00218	-3.48245	8.74012	563.7	0.07322	0.03255	0.02998	0.03014
563.6	-3.47938	-0.4185	-2.99773	8.89876	563.6	0.07333	0.03265	0.03	0.03018
563.5	-1.64466	-0.14737	-2.40391	9.01905	563.5	0.07339	0.0327	0.03007	0.03024
563.4	-0.42884	-0.05433	-2.04628	8.8849	563.4	0.07349	0.03274	0.03007	0.03028
563.3	-0.46622	0.27649	-2.37523	9.32863	563.3	0.07356	0.03282	0.03015	0.03035
563.2	1.03888	0.60502	-2.41582	8.99628	563.2	0.07364	0.0329	0.03021	0.03042
563.1	2.43426	0.83833	-2.22357	9.07482	563.1	0.07376	0.03296	0.03025	0.03048
563	2.90315	1.12433	-1.22124	9.15005	563	0.07386	0.03306	0.0303	0.03049
562.9	2.3375	1.24927	-1.37563	9.65856	562.9	0.07399	0.03309	0.03038	0.03057
562.8	3.39303	0.62173	-1.24111	9.53059	562.8	0.07417	0.0331	0.03048	0.03062
562.7	2.5005	0.67963	-1.04279	9.08631	562.7	0.07434	0.03313	0.03053	0.03069
562.6	0.31021	0.28956	-0.45097	9.49949	562.6	0.07456	0.03317	0.03058	0.0307
562.5	0.71089	0.49936	-0.67873	9.06802	562.5	0.07477	0.03324	0.03067	0.03073
562.4	2.2674	0.89453	-0.53719	8.83004	562.4	0.07493	0.0333	0.0307	0.03076
562.3	1.32144	0.58122	-0.06303	8.02614	562.3	0.07507	0.03339	0.03082	0.03084
562.2	1.04215	0.16692	-0.12558	8.16935	562.2	0.07518	0.03344	0.03086	0.03085
562.1	3.40678	0.03762	-0.1733	8.16927	562.1	0.07531	0.03348	0.03094	0.0309
562	4.53405	0.1469	0.16401	7.31424	562	0.07542	0.03357	0.03105	0.03096
561.9	2.75992	0.15221	-0.04043	7.14124	561.9	0.07552	0.03365	0.03111	0.03101
561.8	3.38238	0.29913	0.56784	7.70859	561.8	0.07563	0.03368	0.03116	0.03112
561.7	2.7848	0.22277	-0.13791	7.97531	561.7	0.07571	0.03372	0.03119	0.03117
561.6	3.39923	0.09496	0.02827	8.12898	561.6	0.07582	0.03376	0.03124	0.03124
561.5	2.44454	0.41184	-0.04947	8.0899	561.5	0.07596	0.03382	0.0313	0.03127
561.4	1.42423	0.79383	-0.16016	7.86694	561.4	0.07614	0.03388	0.03137	0.03133
561.3	0.9566	0.07754	0.85768	7.47511	561.3	0.07634	0.03398	0.03142	0.03138
561.2	1.71388	0.48284	0.93782	7.59507	561.2	0.07658	0.03405	0.03146	0.03144
561.1	2.55146	0.81848	1.2181	7.41519	561.1	0.07681	0.03414	0.03152	0.03152
561	2.71785	0.42427	0.76545	7.36435	561	0.07698	0.03418	0.03163	0.03157
560.9	2.45005	0.67912	1.33783	7.27805	560.9	0.07715	0.03425	0.03169	0.03156
560.8	3.54334	0.54723	0.92939	7.00921	560.8	0.07725	0.0343	0.03175	0.03165
560.7	3.3377	0.69752	1.38072	7.29453	560.7	0.07739	0.03438	0.03181	0.0317
560.6	4.01987	0.24909	0.5084	7.37167	560.6	0.07755	0.03444	0.03188	0.03174
560.5	4.54672	-0.08534	0.65591	7.70537	560.5	0.07767	0.03452	0.03193	0.03182
560.4	3.89333	-0.85942	0.59797	7.70495	560.4	0.07779	0.03462	0.03197	0.03188
560.3	1.54595	-0.29838	0.25352	7.16926	560.3	0.07803	0.03469	0.03203	0.03196
560.2	1.0831	-0.87312	-0.25387	7.09889	560.2	0.0782	0.03476	0.03212	0.03202
560.1	0.6343	-0.91858	-0.88015	6.94977	560.1	0.07836	0.0348	0.03221	0.03207
560	0.71047	-1.19384	-0.10894	7.12825	560	0.07856	0.03489	0.03226	0.03214
559.9	0.52633	-1.59225	-0.11308	6.37724	559.9	0.0788	0.03494	0.03229	0.03218
559.8	0.27505	-2.37421	-0.21343	5.89176	559.8	0.07901	0.03503	0.03239	0.03222
559.7	1.23308	-2.68324	0.17583	5.37521	559.7	0.07927	0.0351	0.03242	0.03226
559.6	1.25535	-2.61981	0.40751	6.52603	559.6	0.07944	0.0352	0.03245	0.0323
559.5	0.30394	-2.65898	0.29691	6.55912	559.5	0.07952	0.0353	0.0325	0.03237
559.4	-1.00116	-2.51903	0.65009	6.89071	559.4	0.0796	0.0354	0.03252	0.03247
559.3	-0.43931	-2.73173	0.25898	6.8779	559.3	0.07966	0.0355	0.0326	0.03258
559.2	-0.9992	-3.1752	0.74817	7.5094	559.2	0.07977	0.03556	0.03266	0.03265
559.1	-0.57995	-2.80789	0.51631	8.06644	559.1	0.07986	0.03563	0.03272	0.03272
559	1.58214	-2.17182	0.29532	8.73412	559	0.07994	0.03568	0.03276	0.03279
558.9	1.46994	-1.8064	0.36195	8.29874	558.9	0.08006	0.03577	0.0328	0.03286
558.8	0.30254	-1.83858	0.50038	8.43068	558.8	0.08016	0.03584	0.03283	0.03291
558.7	-1.29747	-1.44869	0.79193	8.79127	558.7	0.0803	0.0359	0.03286	0.03296
558.6	-0.15653	-1.61099	1.42982	9.55521	558.6	0.08044	0.03595	0.03291	0.03299
558.5	-2.04037	-2.06015	1.59008	9.39623	558.5	0.08056	0.03598	0.03298	0.03305
558.4	-2.4243	-1.99988	1.51097	8.80555	558.4	0.0807	0.03603	0.03308	0.03309
558.3	-1.0621	-1.85485	0.90545	9.01471	558.3	0.08082	0.03609	0.03311	0.03316
558.2	-1.14386	-2.04202	0.95896	9.15666	558.2	0.08099	0.03614	0.03315	0.0332
558.1	-0.87658	-2.20636	1.4236	8.86669	558.1	0.08112	0.03621	0.0332	0.03326
558	-0.80058	-1.84314	1.02736	8.98512	558	0.08127	0.03629	0.03326	0.03334
557.9	-0.32493	-1.91632	0.51047	8.88861	557.9	0.08135	0.03636	0.03334	0.03341
557.8	-1.30534	-1.66853	0.00679	8.78894	557.8	0.08147	0.03642	0.0334	0.03345
557.7	-1.13576	-1.78648	-0.73401	9.19936	557.7	0.08156	0.03651	0.03343	0.03351
557.6	-1.87385	-1.79043	-1.16529	9.34107	557.6	0.08169	0.03658	0.03349	0.03357
557.5	-3.54718	-1.65688	-0.67323	9.58775	557.5	0.0818	0.03666	0.0336	0.03359
557.4	-3.77338	-1.53678	-0.53114	9.67465	557.4	0.08189	0.0367	0.03366	0.03362
557.3	-5.89282	-1.83207	-0.21013	9.52871	557.3	0.08197	0.03673	0.0337	0.03365
557.2	-4.77408	-0.96304	-0.14357	9.63797	557.2	0.08207	0.0368	0.03378	0.03369
557.1	-3.51304	-1.00397	0.20433	9.47349	557.1	0.08216	0.03685	0.03383	0.03369
557	-2.47265	-1.24376	0.07013	9.36971	557	0.08228	0.03694	0.0339	0.03373
556.9	-2.30429	-1.10582	-0.3027	9.36726	556.9	0.0824	0.03702	0.03397	0.03378
556.8	-3.26688	-1.28592	0.44537	9.15406	556.8	0.08254	0.03714	0.034	0.03382
556.7	-3.67887	-1.01901	-0.2426	8.98133	556.7	0.08266	0.03726	0.03407	0.03384
556.6	-5.11536	-1.35651	0.14754	9.43097	556.6	0.08277	0.03735	0.03419	0.03391
556.5	-3.7423	-1.17334	-0.18982	9.89563	556.5	0.08288	0.03742	0.03425	0.03399
556.4	-4.43509	-0.7846	-0.59744	10.5061	556.4	0.0829	0.03749	0.03438	0.03405
556.3	-5.10629	-1.02503	-0.53986	9.54446	556.3	0.08298	0.03757	0.03445	0.03409
556.2	-2.39945	-1.02565	-1.12188	9.60437	556.2	0.08309	0.03761	0.03455	0.03413
556.1	-1.1144	-1.48398	-0.87989	9.41209	556.1	0.08322	0.0377	0.03462	0.03418
556	-1.48289	-1.07846	-0.74574	9.22491	556	0.08333	0.03776	0.03469	0.03424
555.9	-2.61075	-0.88162	-1.46262	9.50777	555.9	0.08342	0.03781	0.03474	0.0343
555.8	-2.32656	-1.23015	-1.64647	8.92709	555.8	0.08355	0.03791	0.03479	0.03433
555.7	-2.91033	-1.45235	-1.57651	9.29916	555.7	0.08375	0.03797	0.03488	0.03439
555.6	-3.79466	-1.81361	-2.12776	9.71004	555.6	0.08395	0.03805	0.03496	0.03444
555.5	-3.56967	-1.8967	-2.38525	9.96857	555.5	0.08416	0.03809	0.03507	0.03451
555.4	-2.16863	-1.89221	-1.64847	10.3074	555.4	0.08433	0.03815	0.03512	0.03461
555.3	-3.25648	-1.30457	-2.38719	9.7702	555.3	0.0845	0.03822	0.03523	0.03467
555.2	-0.72142	-0.8406	-2.6782	9.86481	555.2	0.08469	0.03832	0.0353	0.03475
555.1	0.4871	-0.51262	-2.02875	10.7472	555.1	0.08486	0.03837	0.03537	0.03484
555	-0.42799	-0.98752	-1.20817	10.7754	555	0.08501	0.03843	0.03545	0.03492
554.9	-0.80927	-0.40846	-0.9244	9.99956	554.9	0.08511	0.03848	0.03555	0.03496
554.8	-0.69562	-0.08004	-1.33957	10.8668	554.8	0.08522	0.03856	0.03564	0.03505
554.7	-0.15244	-0.39594	-1.65922	11.4259	554.7	0.08534	0.03863	0.03567	0.0351
554.6	0.48299	-0.35191	-1.68089	11.4739	554.6	0.08552	0.03868	0.03576	0.03513
554.5	0.14699	-0.41909	-1.09096	11.9654	554.5	0.08572	0.03878	0.03583	0.03519
554.4	0.20089	-0.03439	-0.3552	11.1469	554.4	0.08592	0.03886	0.0359	0.03522
554.3	1.54258	-0.26372	-0.18283	11.0914	554.3	0.08613	0.03894	0.03596	0.03529
554.2	1.39974	-0.31751	-0.1553	11.327	554.2	0.08639	0.03902	0.036	0.03537
554.1	1.56062	-0.13848	-0.40097	11.1408	554.1	0.08661	0.0391	0.03605	0.03547
554	2.8149	0.42549	-0.78134	11.3411	554	0.08681	0.03923	0.03611	0.03557
553.9	2.75447	0.44223	-0.64871	11.1424	553.9	0.08698	0.03934	0.03617	0.03565
553.8	0.8818	0.26417	-0.63712	11.4059	553.8	0.08713	0.03944	0.03625	0.03579
553.7	1.28676	0.75646	-0.788	11.1597	553.7	0.08724	0.03953	0.03634	0.03589
553.6	1.21384	0.325	-0.584	11.2157	553.6	0.08735	0.03963	0.03639	0.03599
553.5	2.23571	0.32144	-0.57944	11.6546	553.5	0.08749	0.03966	0.03643	0.03606
553.4	3.19114	0.577	-0.4202	12.4523	553.4	0.08762	0.03966	0.03653	0.03612
553.3	3.4124	0.91953	-0.11189	12.4871	553.3	0.08776	0.03973	0.03659	0.03621
553.2	1.73947	0.78022	0.41375	12.9147	553.2	0.08794	0.03978	0.03666	0.03628
553.1	0.56945	0.52416	0.50436	12.4795	553.1	0.08816	0.03984	0.03667	0.03639
553	1.76004	0.75892	0.2208	12.8835	553	0.0884	0.03987	0.03674	0.03649
552.9	0.34693	0.86424	1.07119	12.6449	552.9	0.08864	0.03995	0.03682	0.03654
552.8	0.91631	0.71548	0.79196	12.8148	552.8	0.08887	0.04001	0.03689	0.03659
552.7	0.49767	0.32532	0.43269	12.9672	552.7	0.08906	0.04009	0.03694	0.03664
552.6	1.68897	0.73501	0.59925	12.2335	552.6	0.08922	0.04021	0.03702	0.0367
552.5	0.90046	0.68703	1.44153	12.5315	552.5	0.08936	0.04031	0.0371	0.03674
552.4	1.5996	0.55681	1.3451	11.8703	552.4	0.0895	0.04042	0.03718	0.03681
552.3	1.30266	0.36008	1.66246	11.4246	552.3	0.08963	0.04051	0.03728	0.03691
552.2	2.34282	0.23947	2.04917	11.7287	552.2	0.08976	0.04063	0.03736	0.03702
552.1	0.70833	0.21603	1.69709	11.5871	552.1	0.08988	0.04073	0.03743	0.03706
552	0.47835	-0.94037	2.18601	11.5055	552	0.09002	0.04082	0.0375	0.03711
551.9	-1.18193	-0.53298	2.31791	11.6529	551.9	0.09017	0.04091	0.03758	0.03714
551.8	-0.33808	-0.95017	1.84821	11.1713	551.8	0.09035	0.04104	0.03762	0.03718
551.7	0.34018	-0.75343	1.6035	11.0787	551.7	0.09053	0.04117	0.03769	0.03722
551.6	1.44718	-1.10321	1.43896	12.0656	551.6	0.09066	0.04131	0.03775	0.03732
551.5	1.75525	-1.36234	1.65843	12.1073	551.5	0.09085	0.04143	0.0378	0.03738
551.4	1.8177	-1.46958	2.14879	11.5324	551.4	0.09099	0.04151	0.03787	0.03748
551.3	2.35432	-1.95775	2.54248	11.1598	551.3	0.09113	0.04163	0.03794	0.03761
551.2	2.75229	-1.72557	2.8132	11.0349	551.2	0.09124	0.04173	0.03803	0.03769
551.1	2.74713	-1.88098	2.53959	11.1024	551.1	0.09137	0.0418	0.03812	0.0378
551	1.26611	-2.59545	2.64501	11.3844	551	0.0914	0.04185	0.03816	0.03789
550.9	1.85082	-2.63382	3.25679	11.3624	550.9	0.09144	0.04192	0.03824	0.03797
550.8	1.86239	-2.3034	2.87079	11.3742	550.8	0.0916	0.04197	0.03833	0.03804
550.7	1.6696	-2.36752	3.8215	11.4114	550.7	0.09176	0.04203	0.03842	0.03808
550.6	1.50704	-2.43968	3.18245	11.4133	550.6	0.09196	0.04209	0.03845	0.03812
550.5	0.87722	-1.82929	3.55866	11.9256	550.5	0.0922	0.04214	0.0385	0.03817
550.4	-0.01637	-1.68863	3.46845	11.7332	550.4	0.09241	0.04219	0.03859	0.03817
550.3	0.85458	-1.28473	3.80859	11.9604	550.3	0.09264	0.04232	0.03868	0.03823
550.2	1.31303	-1.08089	3.21104	11.521	550.2	0.09288	0.04247	0.03877	0.0383
550.1	1.8207	-1.40659	3.51973	10.7865	550.1	0.09305	0.04258	0.03883	0.03837
550	3.43119	-1.56823	3.198	11.3337	550	0.09318	0.04271	0.03887	0.03842
549.9	2.81129	-1.87485	2.09594	10.7349	549.9	0.09335	0.04279	0.03893	0.0385
549.8	2.51891	-1.76608	2.43493	10.8024	549.8	0.09347	0.0429	0.03905	0.03855
549.7	2.02941	-2.11211	2.83122	10.4091	549.7	0.09367	0.04306	0.03915	0.03865
549.6	2.62992	-2.00936	2.57509	10.2751	549.6	0.09383	0.04313	0.03922	0.03875
549.5	2.10305	-1.42153	3.23927	9.67019	549.5	0.09401	0.04321	0.03931	0.03882
549.4	2.42127	-1.42532	3.52954	9.47005	549.4	0.09418	0.04327	0.03936	0.03889
549.3	0.93171	-1.53109	4.73628	8.95809	549.3	0.0944	0.04333	0.03948	0.03897
549.2	0.83699	-0.9666	4.85372	9.69522	549.2	0.09461	0.04342	0.03951	0.03905
549.1	-1.00142	-1.65509	4.7737	10.0715	549.1	0.09478	0.04353	0.03959	0.03911
549	-0.26907	-1.52455	5.50056	10.5335	549	0.09495	0.0436	0.03963	0.03913
548.9	-0.44937	-1.40092	5.21531	10.2494	548.9	0.09511	0.04372	0.03969	0.03914
548.8	0.55138	-1.22948	4.25695	10.023	548.8	0.09531	0.04377	0.03977	0.0392
548.7	1.38	-0.53685	4.22304	10.5925	548.7	0.09554	0.04388	0.03989	0.03933
548.6	1.72405	0.11428	3.66482	10.5295	548.6	0.09572	0.04402	0.03999	0.03941
548.5	-0.43239	0.6634	4.32707	10.5617	548.5	0.09592	0.0441	0.04008	0.03946
548.4	-1.86763	0.57111	4.49051	10.4807	548.4	0.09612	0.04415	0.04018	0.03954
548.3	-1.16971	0.08141	4.39402	9.74867	548.3	0.09634	0.04422	0.04027	0.03961
548.2	-0.17928	0.04764	4.65775	10.5383	548.2	0.09652	0.04431	0.04039	0.03968
548.1	-1.37932	0.26479	3.74021	10.5134	548.1	0.09671	0.04441	0.04045	0.03971
548	-2.19075	0.31961	2.91448	10.7007	548	0.09688	0.04451	0.0405	0.03977
547.9	-1.67174	-0.29315	2.29527	11.1069	547.9	0.09708	0.04462	0.0406	0.03985
547.8	-2.08585	-0.54531	2.13081	11.3884	547.8	0.0973	0.04472	0.04072	0.03991
547.7	-0.50006	0.59407	1.22119	10.8822	547.7	0.09751	0.04482	0.04083	0.03995
547.6	-1.16981	0.10329	1.60453	11.0165	547.6	0.09764	0.04493	0.0409	0.03999
547.5	-1.26422	0.37676	1.41199	11.1957	547.5	0.09782	0.04506	0.04102	0.04002
547.4	-1.87402	0.48861	1.02935	10.977	547.4	0.09795	0.04517	0.04112	0.04006
547.3	-1.94515	-0.09914	2.00651	10.2992	547.3	0.09811	0.04526	0.04119	0.04012
547.2	-1.46221	-0.42563	1.34123	9.86106	547.2	0.09823	0.04536	0.04129	0.0402
547.1	-1.68173	-0.78076	1.1591	10.2467	547.1	0.0984	0.04544	0.04133	0.04027
547	-1.63952	-0.85108	1.59261	11.3735	547	0.09857	0.04549	0.04138	0.04036
546.9	-3.4738	-1.307	0.49777	11.5959	546.9	0.09873	0.04556	0.04149	0.04045
546.8	-3.76398	-0.88257	-0.02069	10.9241	546.8	0.09891	0.04561	0.04157	0.04052
546.7	-4.1734	-0.84777	0.80208	10.8943	546.7	0.09906	0.0457	0.04165	0.04062
546.6	-5.20331	-0.51673	1.18372	11.0146	546.6	0.09919	0.04579	0.04176	0.04071
546.5	-6.69032	-0.43378	1.12386	11.4313	546.5	0.0993	0.04587	0.04184	0.04079
546.4	-6.92753	-0.20619	0.69771	11.2016	546.4	0.09945	0.04595	0.04188	0.04083
546.3	-7.11346	0.40898	1.20161	11.1938	546.3	0.09965	0.04605	0.04197	0.04089
546.2	-4.94705	-0.35159	0.38719	11.8166	546.2	0.09983	0.04616	0.04204	0.04099
546.1	-3.05115	-0.51159	-0.71085	12.8599	546.1	0.10008	0.04629	0.04212	0.04106
546	-3.05913	-0.46485	-1.01663	13.2609	546	0.10031	0.04638	0.04222	0.04114
545.9	-2.22072	-0.4611	-0.89321	13.272	545.9	0.10052	0.04647	0.04229	0.04122
545.8	-1.95434	-0.13246	-1.43163	13.7093	545.8	0.10071	0.04657	0.04238	0.04128
545.7	-1.50724	0.64524	-1.54775	13.8674	545.7	0.10091	0.04667	0.04246	0.04137
545.6	-2.72037	0.99491	-0.46052	13.996	545.6	0.10109	0.04677	0.04257	0.04147
545.5	-1.78581	1.10336	-1.3914	13.4819	545.5	0.10123	0.04685	0.04267	0.04148
545.4	-1.99537	0.10276	-1.58171	13.2901	545.4	0.10142	0.04693	0.04275	0.04157
545.3	-2.0688	-0.19332	-1.23534	13.2329	545.3	0.10157	0.04705	0.0429	0.04159
545.2	-0.76782	-0.86335	-1.3578	13.3987	545.2	0.10173	0.04711	0.04297	0.04168
545.1	-0.64982	-0.80721	-1.46283	12.9118	545.1	0.10186	0.04727	0.04307	0.04177
545	-0.85381	-0.93608	-1.18473	12.8126	545	0.10205	0.04735	0.04318	0.04185
544.9	-1.77627	-0.80637	-1.12639	12.4749	544.9	0.10224	0.04745	0.04331	0.04193
544.8	-2.43224	-0.90816	-0.46727	12.5271	544.8	0.1024	0.04756	0.04342	0.04204
544.7	-1.82727	-0.71304	0.04293	12.2266	544.7	0.10267	0.04769	0.04354	0.04215
544.6	-1.12468	0.78036	0.28736	12.0436	544.6	0.10287	0.04784	0.04359	0.0422
544.5	-0.48442	0.42745	0.87142	12.3308	544.5	0.10306	0.04795	0.04365	0.04225
544.4	-1.02618	0.04798	-0.04556	11.9921	544.4	0.1033	0.04808	0.04374	0.04238
544.3	-2.00686	0.22323	0.13694	12.1397	544.3	0.10352	0.04815	0.04382	0.04248
544.2	-2.46979	-0.20199	1.03925	12.2623	544.2	0.10373	0.04822	0.04387	0.04255
544.1	0.54808	-0.46853	0.28011	13.1331	544.1	0.10391	0.04834	0.04398	0.04264
544	-1.48614	-0.18405	1.00736	14.2952	544	0.10414	0.04844	0.04408	0.04272
543.9	-0.56103	-0.34051	1.78264	13.7319	543.9	0.10435	0.04849	0.04413	0.04282
543.8	-1.05216	-1.30305	1.61089	14.0166	543.8	0.10453	0.04859	0.04424	0.04288
543.7	-1.9898	-1.28485	1.20391	13.789	543.7	0.10472	0.04867	0.04437	0.04296
543.6	-1.18144	-0.68284	1.22816	13.3316	543.6	0.10483	0.04879	0.04448	0.04302
543.5	-1.702	-0.63779	1.46864	13.7768	543.5	0.10503	0.04892	0.0446	0.04307
543.4	-0.63278	-0.26182	1.44909	13.9276	543.4	0.10519	0.04902	0.04468	0.0431
543.3	0.32232	-1.14907	1.40965	13.6156	543.3	0.10544	0.0491	0.04477	0.04313
543.2	0.67048	-0.96846	0.94126	14.5379	543.2	0.10565	0.04923	0.04488	0.04319
543.1	0.1376	-1.05085	1.45376	14.0856	543.1	0.10585	0.04935	0.04496	0.04326
543	-0.84993	-1.22395	1.04919	14.2275	543	0.10607	0.04944	0.04509	0.04335
542.9	-2.10428	-1.09602	1.93748	13.327	542.9	0.10623	0.0495	0.04518	0.04345
542.8	-2.95914	-0.9144	1.83859	12.5096	542.8	0.10647	0.0496	0.04527	0.04353
542.7	-2.77883	-1.29164	1.87718	12.5907	542.7	0.10662	0.04971	0.04533	0.0436
542.6	-2.41576	-2.3211	1.26104	12.7251	542.6	0.1068	0.04975	0.04542	0.04371
542.5	-2.45642	-2.2811	1.04038	12.6055	542.5	0.10697	0.0498	0.04547	0.04379
542.4	-2.58262	-3.51413	1.77727	12.1167	542.4	0.10715	0.04986	0.0456	0.04388
542.3	-2.46015	-3.90055	1.20757	12.9736	542.3	0.1073	0.04996	0.04569	0.04398
542.2	-0.4126	-5.05187	1.07764	12.1968	542.2	0.1075	0.05011	0.04576	0.04406
542.1	-0.12566	-5.05645	0.89975	12.4423	542.1	0.1077	0.05017	0.04581	0.04412
542	-1.3904	-5.14815	1.26938	12.6922	542	0.10787	0.05027	0.04589	0.04423
541.9	-2.00002	-5.35251	2.0834	13.3282	541.9	0.10805	0.05042	0.04599	0.04435
541.8	0.00704	-5.28817	2.33951	14.094	541.8	0.10831	0.0505	0.04602	0.04441
541.7	-0.74769	-5.08463	0.87537	13.7036	541.7	0.10848	0.05056	0.04612	0.0445
541.6	-1.89065	-4.649	0.8884	13.7309	541.6	0.10872	0.05071	0.04618	0.04461
541.5	0.69451	-4.16828	0.4931	13.3837	541.5	0.10895	0.0508	0.04628	0.04466
541.4	0.19754	-4.32201	0.4369	12.6648	541.4	0.10915	0.05085	0.04633	0.04473
541.3	-0.29094	-3.36242	1.00239	13.0502	541.3	0.10939	0.05092	0.04642	0.0448
541.2	-1.39906	-3.55585	1.36597	13.3856	541.2	0.10963	0.05099	0.04652	0.04491
541.1	-0.75809	-3.87575	1.65231	14.0892	541.1	0.10982	0.05108	0.04663	0.045
541	-0.30403	-2.92217	1.58058	13.7824	541	0.11	0.05119	0.04674	0.04504
540.9	0.75274	-3.06716	1.91515	13.4098	540.9	0.11013	0.05131	0.0468	0.04513
540.8	0.33232	-3.09284	1.81285	13.2142	540.8	0.11034	0.05146	0.0469	0.04523
540.7	-0.3631	-3.06865	1.6969	12.2019	540.7	0.11049	0.05157	0.04696	0.0453
540.6	-1.17672	-2.66191	0.92239	11.7714	540.6	0.11067	0.05165	0.04703	0.04536
540.5	-0.85357	-1.95521	1.15022	12.0365	540.5	0.1109	0.0518	0.04715	0.04542
540.4	-0.86272	-0.85506	1.29349	12.5643	540.4	0.11114	0.05194	0.04723	0.04551
540.3	-1.19867	-1.12376	2.03816	11.955	540.3	0.11138	0.05203	0.0473	0.0456
540.2	-0.78468	-0.78309	1.71159	12.35	540.2	0.11161	0.05207	0.04734	0.04571
540.1	-0.50032	-1.05016	2.19882	11.8308	540.1	0.11184	0.05214	0.04743	0.04579
540	0.05879	-0.81964	1.57739	12.1442	540	0.1121	0.05222	0.04752	0.0459
539.9	0.42858	-0.38422	1.64021	12.4627	539.9	0.11232	0.05232	0.04759	0.04601
539.8	-0.1091	-0.36122	1.96393	11.9994	539.8	0.11264	0.05239	0.04768	0.04611
539.7	0.53327	-0.30618	1.60541	11.8035	539.7	0.11285	0.05248	0.04779	0.04618
539.6	0.03887	-0.56375	1.86708	12.3194	539.6	0.11308	0.05258	0.04788	0.04624
539.5	-0.07931	-0.83905	1.25289	12.7484	539.5	0.11326	0.05271	0.04801	0.04635
539.4	-0.57476	-1.23088	1.17246	13.7613	539.4	0.11338	0.05284	0.04815	0.04645
539.3	-0.3223	-0.67015	1.54389	13.9368	539.3	0.11358	0.05295	0.04826	0.04653
539.2	-0.24817	-0.13435	1.88953	13.362	539.2	0.11371	0.0531	0.04835	0.04662
539.1	-0.46295	-0.41348	1.80887	12.5535	539.1	0.11387	0.05322	0.04844	0.0467
539	0.20658	0.43363	2.1879	12.6761	539	0.11401	0.05331	0.0485	0.04674
538.9	0.51835	0.49795	2.74737	11.878	538.9	0.1142	0.05343	0.04858	0.04683
538.8	-0.66483	0.92905	3.26179	13.0727	538.8	0.1144	0.05351	0.04869	0.04692
538.7	-0.6642	1.19926	3.84434	13.1737	538.7	0.11462	0.05362	0.04875	0.047
538.6	-1.31723	1.05761	3.80303	12.6531	538.6	0.11482	0.05371	0.0488	0.04708
538.5	-0.73865	2.04699	3.10929	12.2504	538.5	0.11507	0.05378	0.04892	0.04715
538.4	-0.77872	1.62921	2.7181	11.4867	538.4	0.11527	0.05387	0.04905	0.04724
538.3	-1.39436	1.61859	3.13716	11.6145	538.3	0.11546	0.05399	0.04915	0.0473
538.2	-0.79159	1.19501	3.03681	12.248	538.2	0.11565	0.0541	0.04928	0.04737
538.1	-2.70442	1.17671	2.63208	12.522	538.1	0.11584	0.05419	0.04939	0.04748
538	-2.25072	1.0583	2.63433	13.4551	538	0.11603	0.05436	0.04955	0.04758
537.9	-3.53667	0.40269	1.72275	13.3354	537.9	0.11617	0.05448	0.04965	0.04773
537.8	-4.67166	0.78082	1.71792	14.1511	537.8	0.11637	0.05463	0.04975	0.04783
537.7	-4.77687	1.00831	1.73642	14.3167	537.7	0.11656	0.05479	0.04986	0.04792
537.6	-5.16827	0.35962	1.32753	15.0273	537.6	0.11671	0.0549	0.04994	0.04803
537.5	-5.08599	0.09005	1.08537	15.7523	537.5	0.11695	0.05498	0.05006	0.0481
537.4	-6.54379	1.0461	0.88225	16.0681	537.4	0.11713	0.05504	0.05013	0.04816
537.3	-5.00194	1.2	0.68145	16.3749	537.3	0.11734	0.0551	0.05025	0.04821
537.2	-3.9493	0.38031	0.73063	16.6081	537.2	0.11752	0.05521	0.05033	0.04827
537.1	-1.69235	0.06788	0.20261	16.4639	537.1	0.11769	0.05535	0.05044	0.04836
537	-1.73389	-0.48406	-0.14071	16.5947	537	0.1179	0.05546	0.05056	0.04845
536.9	-1.69549	-0.67506	-0.19247	17.1162	536.9	0.11811	0.05562	0.05068	0.04857
536.8	-2.45621	-0.43293	-0.18288	17.7066	536.8	0.11838	0.0558	0.05081	0.04864
536.7	-1.88948	-0.54118	0.12497	18.0613	536.7	0.11862	0.05595	0.05092	0.04871
536.6	-3.75946	-0.29542	-0.85818	17.9561	536.6	0.11883	0.0561	0.05105	0.04881
536.5	-5.88151	-0.57376	-0.93788	17.9445	536.5	0.11899	0.05623	0.05119	0.04888
536.4	-4.94414	-0.58906	-0.1927	17.918	536.4	0.11919	0.05638	0.05135	0.04895
536.3	-5.70887	-0.51039	-0.10347	17.9699	536.3	0.11947	0.05652	0.05148	0.04902
536.2	-3.39224	-0.34698	0.18455	18.1187	536.2	0.11968	0.05664	0.05168	0.04908
536.1	-2.48377	-0.3213	0.07899	18.0309	536.1	0.1199	0.05675	0.0518	0.04912
536	-3.30635	-0.77499	-0.52338	17.8365	536	0.12013	0.05687	0.05187	0.04918
535.9	-3.48955	-1.10622	-0.13262	18.1574	535.9	0.12034	0.057	0.05199	0.04928
535.8	-3.73008	-0.52243	0.07254	18.2507	535.8	0.12056	0.05714	0.05211	0.04933
535.7	-3.59457	-0.0773	0.000255509	17.9897	535.7	0.1207	0.05729	0.05222	0.04942
535.6	-4.70716	0.86871	-0.61144	18.4738	535.6	0.12092	0.05742	0.05238	0.04952
535.5	-4.12176	0.09902	-1.02629	18.915	535.5	0.12105	0.05755	0.05249	0.04962
535.4	-3.53345	0.65497	-1.85729	18.7388	535.4	0.1212	0.05767	0.05262	0.04976
535.3	-3.36189	0.58809	-1.58872	19.3608	535.3	0.12143	0.05778	0.05272	0.04983
535.2	-3.94093	-0.15565	-1.42434	19.8423	535.2	0.12169	0.05792	0.05284	0.04991
535.1	-3.24727	-0.18166	-1.32625	19.6381	535.1	0.12189	0.05803	0.05293	0.05002
535	-5.44207	-0.21473	-0.91571	20.4112	535	0.12217	0.05817	0.05306	0.05008
534.9	-4.10542	-0.64605	-0.77494	20.0481	534.9	0.12239	0.0583	0.05317	0.05015
534.8	-3.98104	-1.60808	-0.85311	20.1798	534.8	0.12255	0.05845	0.05329	0.0502
534.7	-3.09478	-0.63252	-0.49578	20.277	534.7	0.12272	0.05858	0.05344	0.05027
534.6	-2.25174	-0.10689	-0.7237	20.7282	534.6	0.12291	0.05866	0.05353	0.05032
534.5	-2.47729	-0.40531	-0.69384	19.91	534.5	0.12315	0.05876	0.05365	0.05039
534.4	-1.88229	-0.93864	-0.32038	20.1643	534.4	0.12339	0.05883	0.05378	0.05057
534.3	-2.06391	-1.28595	0.08748	20.2145	534.3	0.1236	0.05889	0.05392	0.0507
534.2	-1.3083	-1.67137	0.11137	19.5775	534.2	0.12383	0.059	0.05401	0.05086
534.1	1.30226	-2.36246	0.37234	19.7833	534.1	0.12409	0.05914	0.05413	0.05102
534	0.88134	-1.74883	0.10136	20.4925	534	0.12437	0.05929	0.05422	0.05114
533.9	0.86144	-1.60322	0.47485	20.2877	533.9	0.12464	0.05939	0.05432	0.05128
533.8	-1.24584	-1.60571	0.46638	19.8051	533.8	0.12494	0.0595	0.05441	0.05136
533.7	-1.88862	-1.16809	0.63616	20.2272	533.7	0.1252	0.05965	0.05456	0.05142
533.6	-4.36927	-1.1379	1.1303	19.5663	533.6	0.12544	0.0598	0.05468	0.05148
533.5	-5.07807	-1.46488	1.20902	19.3961	533.5	0.12562	0.05992	0.05478	0.05157
533.4	-5.60642	-0.87152	1.56491	18.9077	533.4	0.12584	0.06006	0.05488	0.05168
533.3	-4.7354	-0.42146	1.11528	19.0763	533.3	0.12602	0.06015	0.05499	0.05178
533.2	-2.97499	0.54256	1.30001	18.9314	533.2	0.12628	0.06026	0.05512	0.05192
533.1	-2.92694	0.08717	0.61103	19.1897	533.1	0.12644	0.06037	0.05521	0.052
533	-3.49217	-0.26689	1.2494	18.7768	533	0.12658	0.06047	0.05525	0.05211
532.9	-4.30769	-0.41653	1.82799	18.7564	532.9	0.12673	0.06058	0.05529	0.05226
532.8	-2.30929	0.22734	1.73439	18.7211	532.8	0.12691	0.0607	0.05537	0.05239
532.7	-3.01464	0.23671	2.05848	18.7951	532.7	0.1271	0.0608	0.05545	0.05251
532.6	-3.39656	0.21475	1.83538	18.608	532.6	0.12731	0.06092	0.05554	0.05261
532.5	-3.93321	0.04218	1.80128	19.0847	532.5	0.12762	0.06102	0.05561	0.05276
532.4	-3.04084	-0.53463	1.29162	19.3728	532.4	0.12798	0.06111	0.05571	0.05286
532.3	-3.93806	-1.08428	1.23319	19.1642	532.3	0.12838	0.06129	0.05585	0.05295
532.2	-4.28129	-1.09685	1.40228	19.1546	532.2	0.1287	0.06141	0.05597	0.05302
532.1	-5.45841	-2.02916	2.01942	19.3862	532.1	0.12892	0.06152	0.05609	0.0531
532	-3.32342	-0.81546	1.45454	18.8588	532	0.1291	0.06163	0.05619	0.05317
531.9	-2.82374	0.45433	1.92858	19.3674	531.9	0.12924	0.06174	0.05633	0.05327
531.8	-3.65881	-0.36547	2.1474	19.5514	531.8	0.12938	0.06186	0.05646	0.05338
531.7	-4.29752	0.06113	2.02708	19.348	531.7	0.12951	0.06197	0.05657	0.05349
531.6	-4.59022	0.62374	1.90085	19.7193	531.6	0.12966	0.06207	0.05666	0.05364
531.5	-6.11458	0.27151	2.4796	18.6845	531.5	0.12997	0.06215	0.05675	0.05381
531.4	-3.71912	-0.02342	2.25416	18.7064	531.4	0.13024	0.06229	0.05682	0.05398
531.3	-1.82801	-0.38736	2.29005	17.8024	531.3	0.13051	0.06242	0.05694	0.05412
531.2	-0.80666	0.19713	1.71596	17.4037	531.2	0.1308	0.06257	0.05702	0.05421
531.1	-1.05757	0.37893	1.9099	16.5056	531.1	0.13113	0.06272	0.0571	0.05423
531	-1.0709	0.87618	1.97178	16.0339	531	0.13144	0.06289	0.05722	0.0543
530.9	-3.3489	1.35274	1.55734	15.9047	530.9	0.1317	0.06307	0.05737	0.05434
530.8	-4.44448	1.02802	1.57193	15.9547	530.8	0.13188	0.06319	0.05751	0.05439
530.7	-6.11946	0.18516	1.89489	15.2608	530.7	0.13206	0.06333	0.05765	0.05448
530.6	-6.05959	-0.34111	1.52217	15.5995	530.6	0.13232	0.06349	0.0578	0.05463
530.5	-4.94491	-0.84822	2.04013	14.4801	530.5	0.13244	0.06364	0.05789	0.05475
530.4	-3.8264	-0.56098	1.99689	15.2567	530.4	0.13266	0.06377	0.05801	0.05487
530.3	-2.9765	-1.18855	1.47918	16.1027	530.3	0.13285	0.06391	0.05814	0.05499
530.2	-2.77536	-0.77103	1.4244	16.1563	530.2	0.13308	0.064	0.05825	0.05513
530.1	-3.65718	-1.22752	1.78414	17.0033	530.1	0.13334	0.06413	0.05836	0.05524
530	-3.87342	-1.17586	2.23944	16.5842	530	0.13365	0.06427	0.05846	0.05535
529.9	-3.85835	-0.98532	2.60487	16.7733	529.9	0.13392	0.06441	0.05853	0.05547
529.8	-2.6315	-1.20556	2.96238	17.3245	529.8	0.1343	0.06461	0.05868	0.05559
529.7	-3.50105	-1.09196	2.10279	17.6803	529.7	0.13459	0.06479	0.05882	0.0557
529.6	-5.71226	-1.49794	1.53971	17.6107	529.6	0.13483	0.06492	0.05897	0.05582
529.5	-5.19849	-0.83306	1.09223	17.3188	529.5	0.13505	0.06503	0.05911	0.05592
529.4	-5.20736	-0.33744	2.00456	17.0425	529.4	0.13531	0.06511	0.05932	0.05601
529.3	-2.7226	0.08347	1.47699	18.3191	529.3	0.13555	0.06527	0.05948	0.05611
529.2	-3.55231	-0.11304	1.43116	18.7783	529.2	0.13574	0.06535	0.05964	0.0562
529.1	-4.38927	-0.01038	2.43115	19.53	529.1	0.13595	0.06547	0.05978	0.05634
529	-3.7302	0.45344	2.87349	18.266	529	0.13614	0.06561	0.05993	0.05647
528.9	-1.73866	0.75608	2.84725	17.9477	528.9	0.13633	0.06577	0.06007	0.05663
528.8	-1.05842	1.45525	1.82433	18.375	528.8	0.13668	0.06596	0.06022	0.05683
528.7	-1.75884	0.92643	1.72211	18.0414	528.7	0.13706	0.06607	0.06031	0.05698
528.6	-2.21764	0.91186	1.49815	17.9257	528.6	0.13741	0.06623	0.06041	0.05709
528.5	-1.14246	1.88731	2.03417	18.3709	528.5	0.13771	0.06638	0.06052	0.05721
528.4	-0.63412	2.90128	2.6744	17.964	528.4	0.138	0.06656	0.0606	0.05729
528.3	0.28244	3.22227	2.77623	18.1289	528.3	0.13826	0.06675	0.06073	0.05735
528.2	0.21213	3.06476	2.13287	18.6799	528.2	0.13844	0.06691	0.06081	0.0574
528.1	-2.17152	3.16131	2.52399	20.1113	528.1	0.13863	0.06705	0.06093	0.05744
528	-2.91101	2.40422	2.50599	20.8157	528	0.1388	0.06723	0.06107	0.05752
527.9	-2.68887	2.48365	2.45051	21.3382	527.9	0.13904	0.06732	0.06124	0.05762
527.8	-2.67248	2.6361	1.62342	21.8552	527.8	0.13939	0.0675	0.06143	0.0578
527.7	-3.16538	2.12291	1.71101	22.2915	527.7	0.13965	0.06763	0.06156	0.05792
527.6	-1.5412	1.93079	2.23649	22.4862	527.6	0.13997	0.06774	0.06166	0.05805
527.5	0.95883	1.57303	3.13382	23.0275	527.5	0.14023	0.06786	0.06182	0.05817
527.4	2.32455	2.16253	2.02884	23.8568	527.4	0.14044	0.06798	0.06192	0.05824
527.3	2.30597	3.3009	1.68136	23.3023	527.3	0.14068	0.0681	0.06202	0.05835
527.2	3.37365	3.29477	1.37517	24.4625	527.2	0.14095	0.06822	0.06213	0.05847
527.1	3.45412	4.08601	1.98514	23.4948	527.1	0.14119	0.06831	0.06223	0.05856
527	5.09269	4.12088	1.63809	23.0477	527	0.14146	0.06843	0.06232	0.05862
526.9	5.03797	3.31232	1.69199	22.2074	526.9	0.14174	0.06857	0.06244	0.0587
526.8	5.13065	4.03195	1.77611	21.7472	526.8	0.14197	0.06872	0.06257	0.05876
526.7	5.39495	4.25856	1.29757	21.6434	526.7	0.14214	0.06883	0.06269	0.05883
526.6	5.11476	5.17466	1.63952	21.7814	526.6	0.14234	0.06894	0.06281	0.0589
526.5	4.85994	5.16576	0.52415	20.8046	526.5	0.14254	0.06906	0.063	0.05908
526.4	5.18923	5.76706	1.48273	20.698	526.4	0.14278	0.06917	0.06311	0.05918
526.3	5.19549	6.49063	2.09225	21.2198	526.3	0.14305	0.06927	0.06322	0.05932
526.2	5.67581	6.19851	0.65796	21.6661	526.2	0.14338	0.06943	0.06332	0.05946
526.1	4.75954	6.73491	1.62391	22.7161	526.1	0.14373	0.06957	0.0634	0.05958
526	3.12299	6.91275	1.52436	21.8079	526	0.14401	0.06974	0.06348	0.05969
525.9	2.67443	7.21672	1.25638	21.7792	525.9	0.14425	0.06988	0.06356	0.05979
525.8	3.46284	6.97984	0.22733	22.6611	525.8	0.14454	0.06998	0.06364	0.05987
525.7	4.23711	6.45218	0.55505	22.9357	525.7	0.14482	0.07009	0.0637	0.05993
525.6	4.39635	5.97478	0.69949	22.5813	525.6	0.14503	0.07027	0.06381	0.05998
525.5	4.09605	6.28178	1.36215	22.6303	525.5	0.14521	0.07047	0.06398	0.06005
525.4	2.65502	6.22116	1.79329	22.5391	525.4	0.1453	0.07059	0.06412	0.06015
525.3	3.71617	4.92192	2.09285	22.7642	525.3	0.14542	0.07075	0.06428	0.06026
525.2	2.46341	5.23225	2.14278	21.6955	525.2	0.14558	0.07092	0.06443	0.06039
525.1	2.90892	4.22813	2.3914	22.7138	525.1	0.14579	0.07106	0.06457	0.06052
525	0.96165	3.55911	2.0063	22.8307	525	0.14605	0.07119	0.06471	0.06065
524.9	2.0081	2.78413	2.4041	22.1027	524.9	0.14636	0.07127	0.06488	0.0608
524.8	2.13176	2.80181	2.3316	21.6923	524.8	0.14668	0.0714	0.06502	0.06094
524.7	3.32486	2.69661	2.72647	21.5483	524.7	0.14698	0.07148	0.06516	0.061
524.6	2.92335	3.20407	3.60135	20.8237	524.6	0.14724	0.07164	0.06527	0.06111
524.5	2.55738	4.02385	3.04083	20.373	524.5	0.14738	0.07177	0.06538	0.06123
524.4	2.86428	3.55367	2.76159	19.3883	524.4	0.14764	0.07197	0.06554	0.06136
524.3	2.26286	2.76342	1.94146	19.096	524.3	0.1478	0.07216	0.06571	0.06145
524.2	2.04243	3.29343	1.51861	18.9667	524.2	0.14799	0.0724	0.06583	0.06158
524.1	0.15588	2.09755	2.02384	18.7052	524.1	0.14819	0.07264	0.06599	0.06171
524	0.35371	1.88531	2.10089	19.0611	524	0.14836	0.07284	0.06618	0.06178
523.9	-0.74558	1.90515	1.90166	19.0062	523.9	0.14856	0.07299	0.06634	0.06188
523.8	-2.09201	1.50305	1.67476	18.9644	523.8	0.14881	0.0731	0.06652	0.062
523.7	-2.14109	1.28715	2.06486	19.483	523.7	0.14904	0.0732	0.06669	0.06215
523.6	-2.48468	1.81059	1.56985	20.299	523.6	0.14931	0.07329	0.06686	0.06228
523.5	0.6951	1.04982	0.8197	20.5996	523.5	0.14955	0.07341	0.06699	0.06244
523.4	-0.41783	0.4398	1.86982	20.5865	523.4	0.14977	0.07351	0.06712	0.06259
523.3	-1.43401	-0.42606	1.44498	21.2372	523.3	0.14999	0.07364	0.06731	0.06273
523.2	-2.17337	-0.96229	1.80037	21.3054	523.2	0.15024	0.07385	0.06744	0.0628
523.1	0.69434	-1.30808	1.14335	21.5621	523.1	0.15043	0.074	0.06756	0.06291
523	-0.0375	-1.44873	0.85722	21.6413	523	0.15068	0.07421	0.06774	0.06299
522.9	-2.29712	-1.8796	1.88981	20.4196	522.9	0.15089	0.07441	0.06789	0.06304
522.8	-1.733	-2.22301	1.54357	20.197	522.8	0.15105	0.07463	0.06808	0.06311
522.7	-1.64236	-2.72465	1.94976	20.2754	522.7	0.15122	0.07483	0.06826	0.06321
522.6	-1.04001	-2.69453	2.21996	20.291	522.6	0.15139	0.07506	0.06845	0.06331
522.5	-1.86159	-3.22233	2.55336	20.3608	522.5	0.1516	0.07527	0.06864	0.06346
522.4	-3.19381	-3.22298	1.57291	20.854	522.4	0.15181	0.07543	0.06881	0.06363
522.3	-3.96672	-3.4271	2.37935	21.0905	522.3	0.15205	0.07556	0.06891	0.0638
522.2	-2.85622	-3.84028	1.99242	21.5099	522.2	0.15238	0.07566	0.06904	0.06392
522.1	-3.63618	-3.54698	1.44216	21.9199	522.1	0.15275	0.07579	0.06918	0.06405
522	-3.61996	-2.93175	1.47624	21.1431	522	0.15316	0.0759	0.06925	0.06419
521.9	-1.78813	-2.69325	0.81573	22.3925	521.9	0.15355	0.07598	0.06934	0.06431
521.8	-2.36334	-2.5325	0.67021	22.7267	521.8	0.15395	0.0761	0.0695	0.06439
521.7	-0.824	-2.79254	0.77604	22.5607	521.7	0.15425	0.07626	0.06963	0.06445
521.6	-2.87948	-1.49322	1.20971	23.6343	521.6	0.15452	0.07646	0.06975	0.06455
521.5	-2.29555	-2.29932	1.66651	23.9131	521.5	0.15479	0.07662	0.06991	0.06461
521.4	-1.30345	-2.76336	0.75182	24.0518	521.4	0.15497	0.07686	0.07007	0.06475
521.3	-2.64605	-2.48098	0.86859	24.886	521.3	0.15522	0.07703	0.07023	0.06489
521.2	-3.324	-3.38773	0.71387	25.2953	521.2	0.15555	0.07719	0.07041	0.06504
521.1	-4.07651	-3.55303	1.3182	25.6687	521.1	0.15581	0.07735	0.07055	0.06523
521	-5.46521	-2.72152	1.5949	26.2856	521	0.15608	0.07743	0.0707	0.06545
520.9	-5.87702	-2.50893	1.79483	25.5407	520.9	0.15635	0.07747	0.07086	0.06566
520.8	-3.32099	-1.76646	1.28949	25.897	520.8	0.15667	0.0775	0.07098	0.06582
520.7	-5.18501	-2.83262	1.5197	26.8983	520.7	0.15697	0.07757	0.07113	0.066
520.6	-4.47249	-2.375	1.68309	25.423	520.6	0.15731	0.07766	0.07124	0.06617
520.5	-5.38757	-2.56142	1.82892	26.1335	520.5	0.15761	0.07781	0.0714	0.06628
520.4	-6.39755	-2.24616	1.65765	26.8951	520.4	0.15785	0.07798	0.07154	0.06638
520.3	-4.93281	-2.22209	1.93845	26.8614	520.3	0.15806	0.07821	0.0717	0.06649
520.2	-7.44509	-3.03483	2.78693	27.4028	520.2	0.15827	0.07844	0.07185	0.0666
520.1	-5.68691	-2.73639	2.0853	27.9121	520.1	0.15858	0.0787	0.072	0.06672
520	-5.40617	-2.5435	1.95251	27.3977	520	0.15891	0.07896	0.0722	0.06684
519.9	-2.94527	-1.54507	2.30382	27.9845	519.9	0.15919	0.0792	0.07239	0.06696
519.8	-2.11129	-1.93634	1.95575	27.9793	519.8	0.15948	0.07942	0.07256	0.06709
519.7	-1.41525	-2.20783	1.78214	27.7661	519.7	0.15976	0.0796	0.07267	0.06722
519.6	0.96524	-2.65886	2.33741	28.5034	519.6	0.16002	0.07974	0.07277	0.06738
519.5	0.50241	-3.65136	2.69235	29.4624	519.5	0.16026	0.07985	0.07284	0.06757
519.4	-0.35899	-2.98032	3.00722	30.0169	519.4	0.16052	0.0799	0.07297	0.06773
519.3	-0.19351	-2.12766	2.50011	30.2461	519.3	0.16084	0.08	0.07308	0.06787
519.2	-0.10552	-1.77819	2.12144	29.7399	519.2	0.16113	0.08013	0.07318	0.06797
519.1	-1.03364	-0.54154	2.12794	29.7928	519.1	0.16149	0.08027	0.07329	0.06806
519	-1.71162	-0.77663	1.70599	29.8628	519	0.16185	0.08048	0.07341	0.06816
518.9	-0.57956	-0.58666	1.92071	29.7067	518.9	0.16216	0.08069	0.07357	0.06826
518.8	3.10533	-0.86485	1.87585	29.8692	518.8	0.16246	0.08094	0.07372	0.06837
518.7	2.76552	-1.68509	1.09696	30.725	518.7	0.16268	0.08118	0.07387	0.06849
518.6	3.56214	-2.77404	1.21123	30.2947	518.6	0.16286	0.08141	0.07402	0.06859
518.5	2.19951	-3.78164	1.7085	29.4146	518.5	0.16309	0.08161	0.07415	0.06875
518.4	1.21483	-2.67662	1.31685	29.6641	518.4	0.16325	0.08178	0.0743	0.06896
518.3	3.73446	-2.20075	1.32484	29.0548	518.3	0.16343	0.08193	0.07445	0.06915
518.2	1.90855	-2.38647	1.70961	28.3042	518.2	0.16356	0.08208	0.07462	0.06939
518.1	-0.90118	-2.2822	2.31267	28.2217	518.1	0.16386	0.08216	0.07478	0.06956
518	0.59459	-2.32352	2.4754	28.3213	518	0.16418	0.0823	0.07495	0.06969
517.9	1.23231	-2.84724	2.28558	29.1215	517.9	0.16457	0.08245	0.0751	0.06975
517.8	1.40955	-1.43008	1.77476	29.1747	517.8	0.16497	0.0826	0.07529	0.06973
517.7	3.49843	-1.45594	0.75087	28.7026	517.7	0.16536	0.08278	0.07544	0.06974
517.6	7.24439	-2.08315	2.54211	29.9679	517.6	0.16574	0.08306	0.07562	0.06973
517.5	6.26356	-1.54885	1.96237	30.0077	517.5	0.16607	0.08334	0.07575	0.06976
517.4	6.36809	-1.02242	2.24772	30.0303	517.4	0.16639	0.08357	0.07595	0.06983
517.3	4.56332	-0.53177	2.64163	30.7081	517.3	0.1667	0.08384	0.07616	0.06994
517.2	6.81613	-0.30481	2.2724	31.0494	517.2	0.16692	0.08407	0.07632	0.07013
517.1	9.85355	-0.45289	2.32811	31.0025	517.1	0.16721	0.08433	0.07646	0.07029
517	7.2385	-0.76997	2.62393	31.3493	517	0.16746	0.08449	0.07662	0.07049
516.9	6.99766	-0.46888	2.25397	31.5158	516.9	0.16774	0.08465	0.07675	0.07065
516.8	4.93958	-0.64337	2.8226	31.3842	516.8	0.16803	0.0847	0.07689	0.07083
516.7	3.66632	-0.45643	2.15782	31.2382	516.7	0.16834	0.08478	0.077	0.07096
516.6	2.82391	-0.40471	1.39003	31.4528	516.6	0.16876	0.08483	0.07705	0.07106
516.5	2.29632	-0.30123	1.89327	31.7754	516.5	0.16915	0.0849	0.07715	0.07119
516.4	2.05616	-0.24652	2.0745	33.2439	516.4	0.16951	0.08505	0.07728	0.07127
516.3	0.77047	-0.89962	1.68629	33.6988	516.3	0.16984	0.08521	0.07743	0.07138
516.2	2.16428	-0.86665	0.66503	33.4046	516.2	0.17014	0.08545	0.07761	0.07153
516.1	5.10045	-0.98839	0.18518	33.1916	516.1	0.17039	0.08571	0.07775	0.07163
516	6.0668	-1.2216	0.19059	33.1986	516	0.17071	0.08596	0.07795	0.07177
515.9	5.04338	-1.80067	0.66885	33.4486	515.9	0.1709	0.08618	0.07814	0.07194
515.8	7.56922	-2.33068	1.85413	32.6265	515.8	0.17104	0.08644	0.07836	0.07213
515.7	7.8956	-2.7543	2.10002	33.3415	515.7	0.17116	0.08665	0.07851	0.07231
515.6	8.39627	-2.87316	2.64476	33.5416	515.6	0.17133	0.08676	0.07865	0.07245
515.5	5.55672	-2.65927	2.23375	33.8977	515.5	0.1715	0.08693	0.07882	0.07262
515.4	3.21393	-2.43805	2.81878	33.3723	515.4	0.17174	0.08705	0.07898	0.07275
515.3	3.80798	-1.25791	2.8988	33.5551	515.3	0.17201	0.08719	0.07915	0.07291
515.2	2.95552	-1.72146	3.29138	34.4605	515.2	0.17233	0.0873	0.07929	0.07302
515.1	3.48272	-2.86923	3.42523	34.8191	515.1	0.17272	0.08745	0.07942	0.0731
515	3.29966	-3.20907	3.36515	34.1064	515	0.1731	0.08763	0.0796	0.07318
514.9	2.29857	-3.44485	3.14244	34.6885	514.9	0.17353	0.08788	0.07972	0.07325
514.8	3.32752	-3.73957	3.00212	35.3489	514.8	0.17389	0.08812	0.07979	0.07332
514.7	2.79118	-2.8914	1.966	34.8583	514.7	0.17418	0.08834	0.07995	0.07345
514.6	1.55541	-2.88206	1.16406	35.026	514.6	0.1744	0.08856	0.08011	0.0736
514.5	0.89312	-3.4881	1.58609	35.3633	514.5	0.17453	0.08879	0.08025	0.07385
514.4	-0.60157	-4.00729	1.96298	36.5428	514.4	0.17474	0.08899	0.08041	0.07407
514.3	-2.50291	-3.52051	0.8169	36.3921	514.3	0.17487	0.0891	0.08055	0.07431
514.2	-4.63453	-2.97539	1.98209	36.169	514.2	0.17509	0.08916	0.0807	0.07456
514.1	-1.52459	-2.79606	1.95272	36.2577	514.1	0.17536	0.08926	0.08085	0.07475
514	-0.94583	-2.84426	2.20611	36.1471	514	0.17566	0.08936	0.08094	0.07489
513.9	-0.2842	-3.99617	2.35576	36.332	513.9	0.17598	0.08947	0.08105	0.07497
513.8	-0.92543	-4.73931	2.32913	35.4816	513.8	0.17634	0.08961	0.08115	0.07501
513.7	1.48052	-4.54843	2.27783	34.8469	513.7	0.17675	0.08978	0.08125	0.07511
513.6	1.18991	-4.72496	2.7592	34.2963	513.6	0.17707	0.08998	0.08135	0.0752
513.5	2.97509	-5.1758	2.15589	35.5909	513.5	0.17743	0.09025	0.0815	0.07529
513.4	2.64259	-5.50249	2.33657	36.2151	513.4	0.17782	0.09055	0.08162	0.07541
513.3	1.29122	-4.70631	3.89221	36.3525	513.3	0.17814	0.09088	0.08174	0.07561
513.2	1.94836	-4.63779	4.7487	36.1446	513.2	0.17844	0.09116	0.0819	0.07578
513.1	4.34664	-4.34933	4.61217	35.3486	513.1	0.17871	0.09142	0.08211	0.07595
513	3.29931	-4.95257	5.36623	34.1752	513	0.17904	0.09158	0.08231	0.07611
512.9	4.22342	-5.09287	5.7825	33.9024	512.9	0.17943	0.09167	0.08252	0.0762
512.8	2.44872	-4.82326	5.54183	33.709	512.8	0.17983	0.0918	0.08272	0.0763
512.7	1.51889	-5.29334	4.99052	34.4406	512.7	0.18021	0.09192	0.08295	0.0764
512.6	2.66256	-4.5402	4.24995	33.9559	512.6	0.18057	0.09204	0.0831	0.07653
512.5	1.03391	-5.67516	4.47218	33.2055	512.5	0.18095	0.09214	0.08326	0.07663
512.4	1.23485	-5.77115	3.91705	33.3303	512.4	0.1814	0.09227	0.08343	0.07668
512.3	-1.93669	-4.22077	3.48822	33.5789	512.3	0.1818	0.09243	0.08361	0.07681
512.2	-2.21703	-3.63388	3.30021	32.7664	512.2	0.18219	0.09262	0.08377	0.07692
512.1	-0.8863	-3.52984	3.25246	32.6964	512.1	0.18261	0.09279	0.08389	0.07704
512	-0.29575	-4.0211	2.97088	32.5845	512	0.18302	0.09302	0.08412	0.07718
511.9	0.26716	-2.66371	2.07203	32.4062	511.9	0.18337	0.09326	0.08427	0.07736
511.8	-1.28454	-2.713	1.55236	33.0351	511.8	0.18372	0.09353	0.08445	0.07753
511.7	-1.87773	-1.9983	2.7296	31.9442	511.7	0.18405	0.09377	0.08463	0.07767
511.6	-0.85792	-1.90753	1.54357	31.6664	511.6	0.18433	0.09396	0.08481	0.07778
511.5	0.42445	-1.09802	2.06917	32.3276	511.5	0.18464	0.09411	0.08504	0.07795
511.4	1.11815	-1.69311	2.20939	32.5379	511.4	0.18488	0.09427	0.08522	0.07812
511.3	2.25552	-1.75873	3.44242	32.9134	511.3	0.18513	0.09444	0.08539	0.0782
511.2	1.84039	-1.41057	4.0844	32.6981	511.2	0.18541	0.0946	0.08555	0.07833
511.1	2.77392	-0.89618	4.24139	33.0268	511.1	0.18578	0.09477	0.08575	0.07841
511	0.26972	-0.81613	3.519	32.5303	511	0.18614	0.09491	0.08595	0.07854
510.9	-0.46837	-1.46519	3.7401	32.863	510.9	0.18655	0.09513	0.08616	0.07862
510.8	1.35486	-1.29946	2.37564	32.8253	510.8	0.18694	0.09541	0.08639	0.07876
510.7	-0.30928	-2.22345	2.41196	31.2033	510.7	0.18728	0.09565	0.0866	0.07889
510.6	-0.45971	-1.88739	2.47847	32.1737	510.6	0.18761	0.09595	0.08682	0.07907
510.5	-1.20353	-2.383	2.08142	31.442	510.5	0.18791	0.09622	0.08701	0.0793
510.4	-1.9412	-1.08103	2.97616	31.3373	510.4	0.18805	0.09645	0.08722	0.07947
510.3	-0.28456	-1.08599	2.60609	31.9852	510.3	0.18826	0.09666	0.08737	0.07965
510.2	-1.39761	-0.88189	2.61599	31.3471	510.2	0.18849	0.09675	0.08755	0.07979
510.1	-1.49205	-0.69126	3.43642	32.1713	510.1	0.18876	0.09682	0.08779	0.07999
510	-0.84227	-0.62457	3.2313	31.8829	510	0.189	0.09697	0.08804	0.08011
509.9	-2.16811	-1.02265	3.30737	31.5038	509.9	0.18925	0.0971	0.08829	0.08028
509.8	-4.5381	-0.97718	3.09105	31.5626	509.8	0.18956	0.09729	0.08848	0.08043
509.7	-2.88418	-0.51026	3.43815	32.7386	509.7	0.1899	0.09746	0.08864	0.08063
509.6	-2.079	-0.36237	3.49296	33.695	509.6	0.19021	0.09771	0.08879	0.08086
509.5	-3.41245	0.65656	4.38487	33.905	509.5	0.1905	0.09793	0.08894	0.08107
509.4	-3.99242	1.22544	5.61843	32.8492	509.4	0.19084	0.09821	0.08905	0.08129
509.3	-4.84603	1.02995	6.86297	32.5463	509.3	0.1912	0.09842	0.08923	0.08148
509.2	-4.78057	1.67672	6.21935	33.0376	509.2	0.19153	0.09864	0.08934	0.08164
509.1	-5.87561	2.99611	6.78465	34.2936	509.1	0.19178	0.09887	0.08952	0.08181
509	-4.25662	1.20998	8.01589	33.6225	509	0.19199	0.0991	0.08973	0.08197
508.9	-4.40741	0.2677	8.72598	34.2494	508.9	0.19218	0.09929	0.08992	0.08211
508.8	-4.84666	0.02228	8.74054	33.6559	508.8	0.1924	0.09947	0.09011	0.08227
508.7	-5.76152	-0.11817	9.14668	33.0157	508.7	0.19259	0.09962	0.09028	0.08243
508.6	-5.07898	-0.67706	8.89583	33.1566	508.6	0.19276	0.09977	0.09046	0.08257
508.5	-3.44148	-0.08275	7.92784	32.7396	508.5	0.19299	0.09989	0.09058	0.08277
508.4	-3.27276	-0.00661	7.61842	32.777	508.4	0.19329	0.10001	0.09067	0.083
508.3	-2.1249	0.33621	8.53876	33.3801	508.3	0.19363	0.10021	0.09081	0.08328
508.2	-2.50624	-0.52621	8.03485	33.9466	508.2	0.19401	0.10038	0.09097	0.08352
508.1	-1.52625	-0.41629	8.31345	34.6572	508.1	0.19433	0.10063	0.09113	0.08371
508	-2.66274	-0.64274	9.41539	34.8573	508	0.19471	0.1009	0.0913	0.08393
507.9	-1.60937	-0.93842	9.14289	34.5965	507.9	0.19505	0.10114	0.09146	0.08411
507.8	-0.44698	-0.56676	9.46793	33.9612	507.8	0.19532	0.1014	0.09163	0.0843
507.7	0.95722	-0.6072	9.49777	34.6409	507.7	0.19553	0.10167	0.09175	0.08447
507.6	1.93408	-0.55884	10.0518	34.5065	507.6	0.19569	0.10188	0.09185	0.08464
507.5	1.68615	-1.33547	10.3292	34.7542	507.5	0.1958	0.10205	0.09197	0.08472
507.4	1.85852	-0.92937	10.8105	36.5678	507.4	0.19612	0.10219	0.09214	0.08491
507.3	1.46084	-0.66687	11.135	36.5012	507.3	0.19645	0.10229	0.09229	0.08507
507.2	4.97706	-0.73683	11.5619	37.3202	507.2	0.19679	0.10242	0.0925	0.0852
507.1	5.34595	-1.88896	10.5394	37.6789	507.1	0.19721	0.10257	0.09272	0.08536
507	3.90811	-2.43135	10.2152	38.1711	507	0.19761	0.10282	0.09294	0.08551
506.9	3.59954	-2.76485	10.9465	37.6444	506.9	0.19797	0.10309	0.09315	0.08566
506.8	4.28401	-3.87451	10.1588	37.5086	506.8	0.19832	0.10337	0.09329	0.08582
506.7	3.43272	-2.47297	9.73875	37.674	506.7	0.19862	0.10359	0.09339	0.08595
506.6	4.47337	-3.36349	8.82582	38.2438	506.6	0.19888	0.10385	0.09352	0.08607
506.5	5.46101	-2.71069	9.0917	38.7348	506.5	0.19916	0.10405	0.09367	0.0862
506.4	4.2691	-2.16017	8.60652	37.8039	506.4	0.19939	0.1043	0.09381	0.08629
506.3	3.95625	-1.00063	7.91796	37.6904	506.3	0.19972	0.10445	0.09402	0.0864
506.2	2.88298	-1.23152	7.82642	37.8363	506.2	0.19995	0.1046	0.09422	0.08654
506.1	3.51304	-1.51008	6.68487	38.4055	506.1	0.20023	0.10471	0.09443	0.08668
506	2.54479	-2.11423	5.70915	38.3447	506	0.20055	0.10485	0.09461	0.08685
505.9	3.00034	-2.56625	6.27825	38.206	505.9	0.20105	0.10502	0.09485	0.08708
505.8	2.93664	-2.97136	4.38558	38.5525	505.8	0.20152	0.10518	0.09507	0.08725
505.7	1.7797	-3.00936	4.43401	38.0813	505.7	0.20196	0.10537	0.09528	0.0874
505.6	0.14348	-3.3443	5.33627	38.4807	505.6	0.20248	0.10559	0.09552	0.08757
505.5	0.34506	-3.01414	5.13467	39.0769	505.5	0.20299	0.10588	0.09575	0.08769
505.4	0.44865	-3.35578	5.46682	40.6256	505.4	0.20349	0.10621	0.09596	0.08788
505.3	0.44069	-1.29589	4.79425	41.1998	505.3	0.20393	0.10651	0.09617	0.088
505.2	-0.28097	-0.86874	5.96086	42.0879	505.2	0.20428	0.1068	0.09641	0.08807
505.1	1.77142	-0.33605	5.42378	42.2063	505.1	0.20458	0.10704	0.09667	0.08815
505	0.00335	-0.80335	5.29771	41.8607	505	0.20472	0.10721	0.0969	0.08822
504.9	0.49449	-0.58294	4.78236	41.0981	504.9	0.20496	0.10737	0.0971	0.08831
504.8	-2.12448	-0.11374	4.55029	40.4879	504.8	0.20517	0.10746	0.09722	0.08848
504.7	-0.49161	0.98495	4.36014	39.8187	504.7	0.20537	0.10753	0.09736	0.08861
504.6	1.28264	1.54264	3.46527	39.9295	504.6	0.20572	0.1076	0.09754	0.08883
504.5	1.24136	1.63038	3.49871	39.719	504.5	0.20605	0.10766	0.09775	0.08899
504.4	1.25751	1.34943	3.21655	40.4202	504.4	0.2065	0.10783	0.09796	0.0892
504.3	0.75356	1.11044	1.83849	40.8677	504.3	0.20705	0.10805	0.09824	0.08944
504.2	0.04304	1.1813	2.20985	39.85	504.2	0.20761	0.10833	0.09849	0.08968
504.1	-1.19588	1.31848	1.07233	38.6711	504.1	0.20805	0.10857	0.09869	0.08985
504	-2.46739	1.9455	0.47918	38.2034	504	0.20841	0.10886	0.09888	0.09004
503.9	-5.425	2.15793	0.83028	37.8971	503.9	0.20877	0.10914	0.09911	0.09014
503.8	-4.32931	2.11862	2.38142	37.7963	503.8	0.20905	0.10933	0.09926	0.09024
503.7	-5.20879	3.45714	1.77405	37.3283	503.7	0.20935	0.10954	0.09938	0.09035
503.6	-3.69914	5.77469	0.000734695	37.2389	503.6	0.2096	0.1097	0.0995	0.09052
503.5	-2.61132	4.3069	-0.18604	37.2346	503.5	0.20985	0.10985	0.09971	0.0907
503.4	-0.74639	3.5147	-0.19272	37.0999	503.4	0.21017	0.10995	0.09996	0.09088
503.3	-1.08733	4.7819	0.66019	36.4107	503.3	0.2106	0.11008	0.10017	0.0911
503.2	-3.40613	4.00864	0.17202	36.6968	503.2	0.21097	0.11027	0.10041	0.09132
503.1	-5.83982	4.03163	0.8076	36.5791	503.1	0.21137	0.11048	0.10062	0.09156
503	-2.9606	3.07689	0.15795	35.7659	503	0.21177	0.11071	0.10086	0.09174
502.9	-2.73185	2.97359	-0.46093	35.3379	502.9	0.21223	0.11096	0.10105	0.09196
502.8	-4.60223	2.94089	-0.98323	36.2012	502.8	0.21263	0.11117	0.10129	0.0921
502.7	-5.5109	3.83806	-0.69145	36.4141	502.7	0.21294	0.11133	0.10157	0.09222
502.6	-4.66967	2.47948	-1.29609	37.957	502.6	0.21325	0.11153	0.10178	0.09237
502.5	-2.01318	1.4749	-1.4883	38.2291	502.5	0.21351	0.11172	0.10199	0.09251
502.4	-1.24364	2.08529	-2.11103	39.1475	502.4	0.21383	0.11194	0.10213	0.09269
502.3	1.68802	2.85615	-2.25832	39.2309	502.3	0.2141	0.11218	0.10226	0.09285
502.2	0.25916	2.35688	-1.56265	40.3634	502.2	0.21443	0.11237	0.10238	0.09311
502.1	-1.90515	2.21583	-1.2764	39.0464	502.1	0.21474	0.11252	0.10253	0.09326
502	-1.78996	0.44536	-0.6548	38.9301	502	0.21515	0.11268	0.10269	0.09343
501.9	0.71218	-1.20905	-1.45134	38.8113	501.9	0.21558	0.11284	0.10281	0.09364
501.8	0.88115	-1.1408	-0.9741	39.8032	501.8	0.21607	0.11303	0.10298	0.09382
501.7	-0.22987	-0.24342	-0.50749	40.009	501.7	0.21653	0.11326	0.10317	0.09402
501.6	-0.21262	1.01218	0.52367	40.9488	501.6	0.21699	0.11348	0.10346	0.0942
501.5	-0.56886	0.11397	-1.08284	41.7642	501.5	0.21744	0.11377	0.10376	0.09437
501.4	-2.48877	-0.36536	-1.24895	41.1088	501.4	0.21794	0.11405	0.10404	0.09456
501.3	-3.15471	-0.00382	-1.70622	40.9262	501.3	0.21838	0.11432	0.10429	0.09472
501.2	-4.97632	0.10237	-2.3304	40.6698	501.2	0.21867	0.11464	0.10449	0.09493
501.1	-5.14057	0.26655	-1.69999	40.8554	501.1	0.21896	0.11491	0.10467	0.09508
501	-3.12354	-0.14226	-1.26779	41.0043	501	0.21919	0.11515	0.10478	0.0952
500.9	-2.7341	-0.60026	-0.25479	42.3632	500.9	0.21943	0.11541	0.1049	0.09528
500.8	-3.29178	-0.16941	0.74229	42.8934	500.8	0.21971	0.11565	0.10508	0.09543
500.7	-3.7797	-0.40139	1.02005	42.9069	500.7	0.22002	0.11585	0.10524	0.09555
500.6	-2.25571	-0.80077	-0.24559	43.4459	500.6	0.22042	0.11603	0.10541	0.09575
500.5	-2.66611	-0.04656	1.10732	43.7534	500.5	0.22085	0.11625	0.10565	0.09597
500.4	-1.97925	-0.15442	0.66232	44.7025	500.4	0.22128	0.11643	0.10593	0.09617
500.3	-3.1046	-2.13028	2.03364	44.9704	500.3	0.22167	0.11666	0.10623	0.09635
[truncated: 1,503 more rows]
