# Supplementary material for: Achieving Robust Cholesteric Liquid Crystal Polymer Networks with High Luminescence Dissymmetry Factor
Source: Research Square preprint supplement (doi:10.21203/rs.3.rs-7436711/v1), 2025-09-17
Supplement: Supplementary file 8 [file 985505b230c3a9df653d5dc7.xlsx]

## Sheet: Sheet1
	Before rinsing	After rinsing
200	0.15858	0.15515
200.5	0.15785	0.15501
201	0.15693	0.15478
201.5	0.1564	0.15373
202	0.15535	0.15268
202.5	0.15333	0.15109
203	0.15174	0.1497
203.5	0.1506	0.14906
204	0.15006	0.14768
204.5	0.14838	0.14619
205	0.14637	0.1437
205.5	0.14498	0.14268
206	0.14357	0.14136
206.5	0.14279	0.14024
207	0.14153	0.1385
207.5	0.14012	0.13706
208	0.13807	0.13566
208.5	0.1364	0.13478
209	0.13547	0.13345
209.5	0.13433	0.13212
210	0.13312	0.13061
210.5	0.13167	0.1294
211	0.13062	0.12848
211.5	0.12942	0.12709
212	0.12865	0.12625
212.5	0.12771	0.12512
213	0.12658	0.12419
213.5	0.12513	0.12285
214	0.12392	0.12139
214.5	0.12272	0.12027
215	0.12151	0.11887
215.5	0.12027	0.11757
216	0.11898	0.11593
216.5	0.11743	0.11448
217	0.11558	0.11287
217.5	0.11391	0.11149
218	0.11204	0.10963
218.5	0.11043	0.10796
219	0.10867	0.10583
219.5	0.10706	0.10422
220	0.10514	0.10255
220.5	0.10333	0.10107
221	0.1014	0.09917
221.5	0.10004	0.09761
222	0.09828	0.09586
222.5	0.0968	0.09453
223	0.09494	0.09263
223.5	0.09309	0.09085
224	0.09125	0.08892
224.5	0.08943	0.08732
225	0.08763	0.08561
225.5	0.08609	0.08418
226	0.0844	0.08253
226.5	0.0832	0.08135
227	0.08175	0.07996
227.5	0.08051	0.07868
228	0.07903	0.07743
228.5	0.07787	0.07623
229	0.07671	0.07523
229.5	0.07578	0.07424
230	0.07466	0.07339
230.5	0.07369	0.07254
231	0.07289	0.07177
231.5	0.07225	0.07081
232	0.07162	0.07019
232.5	0.07096	0.06941
233	0.07035	0.06893
233.5	0.06998	0.06845
234	0.06939	0.06805
234.5	0.0691	0.06807
235	0.06867	0.06789
235.5	0.06815	0.06782
236	0.0676	0.06707
236.5	0.06731	0.06651
237	0.06717	0.06603
237.5	0.06706	0.06594
238	0.06652	0.06592
238.5	0.06609	0.06537
239	0.06559	0.0648
239.5	0.06537	0.06423
240	0.06515	0.06415
240.5	0.06461	0.06375
241	0.0639	0.06308
241.5	0.06348	0.06257
242	0.06298	0.06193
242.5	0.06265	0.06165
243	0.06193	0.06106
243.5	0.0614	0.06068
244	0.06061	0.05975
244.5	0.06014	0.05895
245	0.05982	0.05848
245.5	0.05957	0.05815
246	0.05877	0.05765
246.5	0.05816	0.05713
247	0.05735	0.05642
247.5	0.057	0.05604
248	0.05639	0.05552
248.5	0.05585	0.05506
249	0.05527	0.05445
249.5	0.05472	0.05363
250	0.05445	0.05341
250.5	0.05424	0.05312
251	0.05377	0.05298
251.5	0.05329	0.05238
252	0.05274	0.05172
252.5	0.05245	0.05123
253	0.05214	0.05105
253.5	0.05209	0.05099
254	0.05193	0.0508
254.5	0.05184	0.05044
255	0.05136	0.05015
255.5	0.05107	0.04984
256	0.05086	0.0498
256.5	0.05085	0.04975
257	0.05112	0.04968
257.5	0.05128	0.04982
258	0.05165	0.05004
258.5	0.05151	0.05039
259	0.05143	0.05028
259.5	0.05131	0.05022
260	0.05166	0.05024
260.5	0.05184	0.05034
261	0.05207	0.05038
261.5	0.05201	0.05037
262	0.05217	0.05069
262.5	0.05212	0.05083
263	0.05208	0.05084
263.5	0.05216	0.05092
264	0.05212	0.05094
264.5	0.05227	0.05109
265	0.05223	0.05092
265.5	0.05228	0.05076
266	0.05207	0.05057
266.5	0.0517	0.05016
267	0.05166	0.05
267.5	0.05163	0.04974
268	0.05173	0.04985
268.5	0.05127	0.04967
269	0.05093	0.04964
269.5	0.05054	0.04936
270	0.05034	0.0492
270.5	0.05006	0.04874
271	0.04972	0.04827
271.5	0.04935	0.04794
272	0.04894	0.04759
272.5	0.04859	0.04733
273	0.0481	0.04676
273.5	0.04763	0.04644
274	0.04702	0.04577
274.5	0.04611	0.04496
275	0.04528	0.04423
275.5	0.04441	0.04341
276	0.04374	0.04259
276.5	0.04278	0.04135
277	0.04191	0.04051
277.5	0.04099	0.03959
278	0.04017	0.03872
278.5	0.03907	0.03763
279	0.03808	0.03676
279.5	0.03684	0.03582
280	0.03598	0.03497
280.5	0.03502	0.03402
281	0.03446	0.03316
281.5	0.03384	0.03249
282	0.0334	0.03198
282.5	0.03272	0.03134
283	0.03191	0.03051
283.5	0.03133	0.02985
284	0.03089	0.02949
284.5	0.03059	0.02938
285	0.03043	0.0294
285.5	0.03037	0.02927
286	0.03041	0.02909
286.5	0.0301	0.02879
287	0.02983	0.0286
287.5	0.02959	0.02858
288	0.02941	0.02841
288.5	0.0294	0.02837
289	0.0291	0.02821
289.5	0.02903	0.02817
290	0.02895	0.02797
290.5	0.02907	0.02779
291	0.02909	0.02774
291.5	0.02904	0.02793
292	0.02899	0.02794
292.5	0.02908	0.0279
293	0.02927	0.02799
293.5	0.02919	0.02785
294	0.02933	0.02793
294.5	0.02935	0.02787
295	0.02948	0.02801
295.5	0.02942	0.02817
296	0.0295	0.02823
296.5	0.02981	0.02832
297	0.02965	0.0283
297.5	0.02954	0.02843
298	0.02934	0.02837
298.5	0.02944	0.02841
299	0.02946	0.02826
299.5	0.02956	0.02829
300	0.02951	0.02809
300.5	0.02939	0.02795
301	0.02917	0.02778
301.5	0.0294	0.02813
302	0.02935	0.02809
302.5	0.02949	0.0284
303	0.02925	0.02818
303.5	0.02932	0.02832
304	0.02932	0.02819
304.5	0.02979	0.02841
305	0.03033	0.02926
305.5	0.03092	0.02991
306	0.03124	0.03025
306.5	0.03128	0.03022
307	0.03175	0.03073
307.5	0.03181	0.03131
308	0.03201	0.03112
308.5	0.0321	0.03106
309	0.03242	0.03114
309.5	0.03287	0.03195
310	0.03313	0.03224
310.5	0.03353	0.03258
311	0.03371	0.03282
311.5	0.03391	0.03304
312	0.03379	0.03278
312.5	0.03418	0.03314
313	0.03439	0.03349
313.5	0.03496	0.0337
314	0.03484	0.03369
314.5	0.03506	0.0337
315	0.0353	0.03463
315.5	0.03585	0.03504
316	0.03619	0.03571
316.5	0.03606	0.0356
317	0.03646	0.03555
317.5	0.03671	0.03566
318	0.03728	0.03628
318.5	0.03787	0.03718
319	0.03858	0.03745
319.5	0.03885	0.03781
320	0.03902	0.038
320.5	0.0395	0.03869
321	0.04049	0.03928
321.5	0.04107	0.0397
322	0.04109	0.03962
322.5	0.04152	0.03978
323	0.04137	0.03958
323.5	0.0418	0.03996
324	0.0421	0.04
324.5	0.04281	0.04102
325	0.04361	0.0413
325.5	0.04445	0.0421
326	0.04505	0.04232
326.5	0.04545	0.04328
327	0.04529	0.04366
327.5	0.04613	0.04432
328	0.04689	0.04484
328.5	0.04794	0.046
329	0.04859	0.04677
329.5	0.04922	0.04785
330	0.05023	0.04849
330.5	0.05106	0.04907
331	0.05168	0.04974
331.5	0.05212	0.05028
332	0.05284	0.05152
332.5	0.05352	0.05206
333	0.05447	0.05271
333.5	0.05542	0.05303
334	0.05687	0.05435
334.5	0.05774	0.05537
335	0.05807	0.05597
335.5	0.0582	0.05592
336	0.05887	0.05661
336.5	0.06035	0.0582
337	0.06151	0.05976
337.5	0.06266	0.06059
338	0.06346	0.06148
338.5	0.06452	0.06227
339	0.06523	0.06306
339.5	0.06615	0.06363
340	0.06694	0.06448
340.5	0.0679	0.06542
341	0.06894	0.06618
341.5	0.06984	0.06692
342	0.07069	0.06781
342.5	0.07107	0.06871
343	0.07206	0.0695
343.5	0.07281	0.07041
344	0.07388	0.07135
344.5	0.07405	0.07208
345	0.07501	0.07287
345.5	0.07564	0.07355
346	0.07695	0.07428
346.5	0.07764	0.07481
347	0.0784	0.07557
347.5	0.0792	0.07645
348	0.0799	0.07725
348.5	0.08074	0.07807
349	0.0813	0.07853
349.5	0.08216	0.07929
350	0.0826	0.07972
350.5	0.08316	0.08062
351	0.0834	0.08125
351.5	0.08402	0.08147
352	0.08457	0.08149
352.5	0.08507	0.08163
353	0.08554	0.08207
353.5	0.08564	0.08277
354	0.08604	0.08316
354.5	0.08635	0.0835
355	0.08702	0.08381
355.5	0.08745	0.08414
356	0.08759	0.08443
356.5	0.08758	0.08425
357	0.08754	0.08432
357.5	0.08781	0.08431
358	0.08767	0.08446
358.5	0.08786	0.08445
359	0.08767	0.08453
359.5	0.08801	0.08482
360	0.08783	0.08481
360.5	0.08802	0.08473
361	0.08793	0.08449
361.5	0.08794	0.08443
362	0.08756	0.08442
362.5	0.08735	0.0844
363	0.08717	0.08428
363.5	0.08716	0.08417
364	0.0871	0.08385
364.5	0.0872	0.08368
365	0.08706	0.08352
365.5	0.08697	0.08353
366	0.08631	0.08307
366.5	0.08604	0.08256
367	0.08535	0.08183
367.5	0.08509	0.08148
368	0.08451	0.08107
368.5	0.08415	0.08078
369	0.08336	0.08021
369.5	0.08267	0.07952
370	0.08228	0.07909
370.5	0.08179	0.07858
371	0.08115	0.07806
371.5	0.08015	0.07725
372	0.07902	0.07558
372.5	0.07775	0.07392
373	0.07668	0.07211
373.5	0.07596	0.07143
374	0.07537	0.07071
374.5	0.07431	0.06989
375	0.07323	0.06889
375.5	0.07216	0.06779
376	0.07134	0.06689
376.5	0.07048	0.066
377	0.06963	0.0652
377.5	0.06853	0.06421
378	0.06738	0.06314
378.5	0.06615	0.06194
379	0.06515	0.06086
379.5	0.06405	0.0598
380	0.06295	0.0588
380.5	0.06177	0.05772
381	0.06066	0.05669
381.5	0.05942	0.0554
382	0.05804	0.05415
382.5	0.05677	0.05281
383	0.05548	0.05178
383.5	0.05425	0.05066
384	0.05292	0.0495
384.5	0.05159	0.04816
385	0.0503	0.04692
385.5	0.04884	0.04553
386	0.04752	0.04426
386.5	0.04615	0.0429
387	0.04475	0.04162
387.5	0.04322	0.04026
388	0.04181	0.03884
388.5	0.04045	0.03752
389	0.03914	0.03621
389.5	0.03766	0.03491
390	0.03639	0.03366
390.5	0.035	0.03243
391	0.03369	0.03131
391.5	0.03238	0.03011
392	0.03104	0.02894
392.5	0.02963	0.02757
393	0.02812	0.02625
393.5	0.0267	0.02495
394	0.0254	0.02388
394.5	0.02416	0.02276
395	0.02295	0.02168
395.5	0.02175	0.02056
396	0.02065	0.0195
396.5	0.01952	0.01852
397	0.01843	0.0175
397.5	0.01738	0.0166
398	0.01647	0.01574
398.5	0.01558	0.01496
399	0.01469	0.01414
399.5	0.0139	0.01332
400	0.01303	0.01248
400.5	0.01224	0.0117
401	0.01135	0.01091
401.5	0.0108	0.01039
402	0.01024	0.01002
402.5	0.00973	0.00968
403	0.00908	0.00918
403.5	0.00851	0.00864
404	0.00804	0.00813
404.5	0.00766	0.00771
405	0.00736	0.00726
405.5	0.00694	0.00683
406	0.0066	0.00656
406.5	0.00623	0.00644
407	0.00611	0.00633
407.5	0.00587	0.00603
408	0.0055	0.0057
408.5	0.00528	0.00556
409	0.005	0.00551
409.5	0.00496	0.00545
410	0.00484	0.00521
410.5	0.00478	0.00503
411	0.00466	0.00481
411.5	0.00446	0.00467
412	0.00422	0.00451
412.5	0.00413	0.00444
413	0.00405	0.00449
413.5	0.00415	0.0045
414	0.00394	0.00449
414.5	0.00386	0.00423
415	0.00366	0.0041
415.5	0.00365	0.00394
416	0.0036	0.00395
416.5	0.00362	0.0039
417	0.00347	0.00378
417.5	0.00335	0.00375
418	0.00316	0.00364
418.5	0.00313	0.00359
419	0.00302	0.00336
419.5	0.00296	0.00331
420	0.00287	0.00317
420.5	0.00288	0.00329
421	0.00284	0.00312
421.5	0.00287	0.00312
422	0.00285	0.00302
422.5	0.00284	0.00307
423	0.00269	0.00302
423.5	0.00252	0.00283
424	0.00254	0.00272
424.5	0.00251	0.00266
425	0.00251	0.00261
425.5	0.00233	0.00262
426	0.00231	0.00256
426.5	0.00223	0.00262
427	0.00218	0.00253
427.5	0.00219	0.00248
428	0.00222	0.00244
428.5	0.00231	0.00238
429	0.00217	0.00237
429.5	0.00203	0.00228
430	0.00195	0.00226
430.5	0.00194	0.00219
431	0.00197	0.00224
431.5	0.00193	0.0022
432	0.00184	0.00206
432.5	0.00172	0.00189
433	0.00154	0.00183
433.5	0.00153	0.00188
434	0.00154	0.00184
434.5	0.00153	0.00184
435	0.00146	0.0018
435.5	0.00133	0.00179
436	0.00145	0.00175
436.5	0.00142	0.00173
437	0.00152	0.00166
437.5	0.00129	0.00151
438	0.00123	0.0014
438.5	0.00111	0.00141
439	0.00115	0.00147
439.5	0.00122	0.00152
440	0.00116	0.00151
440.5	0.00113	0.00141
441	0.00111	0.00139
441.5	0.00115	0.00129
442	0.00108	0.00129
442.5	0.000898	0.0012
443	0.000846	0.00125
443.5	0.000872	0.00118
444	0.000938	0.0011
444.5	0.000819	0.000898
445	0.000833	0.000937
445.5	0.00076	0.000979
446	0.000799	0.00104
446.5	0.000585	0.000943
447	0.000509	0.000737
447.5	0.0005	0.000729
448	0.000496	0.000574
448.5	0.000542	0.000748
449	0.000492	0.000689
449.5	0.000515	0.000659
450	0.000456	0.000448
450.5	0.000388	0.000466
451	0.000407	0.000584
451.5	0.000401	0.00066
452	0.000462	0.000569
452.5	0.000423	0.000522
453	0.000438	0.000536
453.5	0.000286	0.00055
454	0.000224	0.000479
454.5	0.00016	0.000502
455	0.000173	0.000459
455.5	0.000205	0.000468
456	0.000201	0.000365
456.5	0.000187	0.000307
457	9e-05	0.000301
457.5	1.2e-05	0.000244
458	2.3e-05	0.000239
458.5	8.7e-05	0.000234
459	7.5e-05	0.000207
459.5	5e-06	0.000217
460	2.8e-05	0.000258
460.5	-5.9e-05	0.000211
461	-7.2e-05	0.000114
461.5	-0.000124	2.3e-05
462	2.3e-05	0.000104
462.5	3.9e-05	0.000106
463	-9.4e-05	1.2e-05
463.5	-0.000183	-0.000132
464	-0.000187	-0.000139
464.5	-0.000137	-0.000205
465	-0.000144	-0.000178
465.5	-0.000226	-0.000254
466	-0.000242	-0.000261
466.5	-0.000275	-0.000278
467	-0.000224	-0.000218
467.5	-0.000261	-0.000197
468	-0.000336	-0.00026
468.5	-0.000383	-0.000309
469	-0.000385	-0.000283
469.5	-0.00038	-0.000293
470	-0.000384	-0.000361
470.5	-0.000421	-0.000417
471	-0.000373	-0.000461
471.5	-0.000454	-0.000458
472	-0.000428	-0.000511
472.5	-0.000521	-0.00049
473	-0.000464	-0.000459
473.5	-0.000585	-0.000472
474	-0.000482	-0.00054
474.5	-0.000571	-0.000665
475	-0.000537	-0.000713
475.5	-0.000592	-0.00075
476	-0.00055	-0.000652
476.5	-0.000618	-0.000676
477	-0.000667	-0.000616
477.5	-0.000706	-0.000719
478	-0.000709	-0.000703
478.5	-0.000699	-0.000734
479	-0.000693	-0.000711
479.5	-0.000636	-0.000728
480	-0.000676	-0.000728
480.5	-0.000694	-0.00072
481	-0.000769	-0.000761
481.5	-0.000812	-0.000815
482	-0.000814	-0.000875
482.5	-0.000837	-0.000929
483	-0.000836	-0.000985
483.5	-0.000951	-0.00105
484	-0.000931	-0.00103
484.5	-0.000947	-0.00095
485	-0.00091	-0.000911
485.5	-0.000915	-0.000889
486	-0.000841	-0.000836
486.5	-0.000831	-0.000801
487	-0.000824	-0.00076
487.5	-0.000932	-0.000827
488	-0.000901	-0.000863
488.5	-0.000941	-0.001
489	-0.000922	-0.00108
489.5	-0.00106	-0.00119
490	-0.000997	-0.00114
490.5	-0.00104	-0.00115
491	-0.00097	-0.00111
491.5	-0.00104	-0.00109
492	-0.00105	-0.00112
492.5	-0.00106	-0.00114
493	-0.0011	-0.00125
493.5	-0.00109	-0.00124
494	-0.00112	-0.00125
494.5	-0.00115	-0.00124
495	-0.00109	-0.00132
495.5	-0.00111	-0.00137
496	-0.00117	-0.0015
496.5	-0.00131	-0.00146
497	-0.00133	-0.00148
497.5	-0.00132	-0.0014
498	-0.00133	-0.00148
498.5	-0.00138	-0.00151
499	-0.00132	-0.00156
499.5	-0.00125	-0.00147
500	-0.00117	-0.00136
