# Supplementary material for: Achieving Robust Cholesteric Liquid Crystal Polymer Networks with High Luminescence Dissymmetry Factor
Source: Research Square preprint supplement (doi:10.21203/rs.3.rs-7436711/v1), 2025-09-17
Supplement: Supplementary file 9 [file 99528b6cb7f65e9dd7831191.xlsx]

## Sheet: Sheet1
	FC1	FC6	PC6
200	1	1	1
200.5	0.99921	0.99769	0.99821
201	0.99795	0.99339	0.99506
201.5	0.9965	0.98812	0.99136
202	0.99426	0.98139	0.98734
202.5	0.99215	0.97623	0.98322
203	0.98936	0.96972	0.98043
203.5	0.98637	0.9638	0.97741
204	0.98281	0.95746	0.97569
204.5	0.97958	0.95063	0.9741
205	0.97578	0.94323	0.97216
205.5	0.97231	0.93643	0.97122
206	0.96832	0.92907	0.96964
206.5	0.96468	0.92142	0.97023
207	0.96131	0.91443	0.96944
207.5	0.95787	0.90753	0.97001
208	0.95433	0.89987	0.97025
208.5	0.95092	0.89262	0.97062
209	0.94752	0.88575	0.9709
209.5	0.94375	0.87757	0.97076
210	0.94043	0.87024	0.97056
210.5	0.93696	0.86275	0.97071
211	0.93393	0.85553	0.96991
211.5	0.93027	0.84769	0.96928
212	0.92656	0.84096	0.96796
212.5	0.92239	0.83375	0.96684
213	0.91811	0.82718	0.96519
213.5	0.91342	0.82102	0.96324
214	0.90839	0.81451	0.96096
214.5	0.90255	0.80835	0.958
215	0.89652	0.80153	0.95431
215.5	0.88969	0.79423	0.95007
216	0.88197	0.78641	0.94528
216.5	0.87368	0.77936	0.93916
217	0.86541	0.7717	0.93172
217.5	0.85608	0.76407	0.92322
218	0.8465	0.75671	0.91309
218.5	0.83664	0.74989	0.90192
219	0.82646	0.74244	0.89004
219.5	0.8154	0.73512	0.8774
220	0.80431	0.72835	0.86375
220.5	0.79268	0.72154	0.84993
221	0.78098	0.71413	0.83582
221.5	0.7691	0.70768	0.8215
222	0.7571	0.70098	0.80653
222.5	0.74457	0.69296	0.7917
223	0.73169	0.68521	0.77639
223.5	0.71858	0.67698	0.76094
224	0.70555	0.66874	0.74422
224.5	0.69271	0.66043	0.72753
225	0.68024	0.65313	0.70994
225.5	0.66849	0.6456	0.69321
226	0.65668	0.63798	0.67668
226.5	0.64535	0.63016	0.6607
227	0.63428	0.62272	0.64494
227.5	0.62381	0.61508	0.62969
228	0.6138	0.60787	0.61521
228.5	0.60448	0.6013	0.60103
229	0.59534	0.59489	0.58819
229.5	0.58701	0.58873	0.57553
230	0.57919	0.58318	0.56438
230.5	0.57165	0.57707	0.55401
231	0.56498	0.57152	0.54456
231.5	0.55948	0.56635	0.53539
232	0.55439	0.56177	0.52637
232.5	0.54995	0.55733	0.5184
233	0.54618	0.55382	0.51127
233.5	0.54305	0.55071	0.5055
234	0.53997	0.54792	0.50034
234.5	0.53728	0.54519	0.49636
235	0.53479	0.54246	0.49316
235.5	0.53272	0.54018	0.49103
236	0.53075	0.53762	0.48928
236.5	0.52899	0.53531	0.48819
237	0.52718	0.53307	0.48739
237.5	0.52578	0.53119	0.48708
238	0.52441	0.52932	0.48735
238.5	0.52283	0.52756	0.4874
239	0.52119	0.52531	0.48803
239.5	0.51981	0.52316	0.48807
240	0.51839	0.52078	0.48862
240.5	0.51712	0.51853	0.48918
241	0.51607	0.51664	0.4902
241.5	0.51505	0.51446	0.49156
242	0.51422	0.5119	0.49281
242.5	0.51334	0.50932	0.49453
243	0.51244	0.50678	0.49683
243.5	0.51171	0.50384	0.49948
244	0.51138	0.50176	0.50216
244.5	0.51089	0.49926	0.50486
245	0.51048	0.49712	0.50802
245.5	0.51002	0.49419	0.5112
246	0.5094	0.49144	0.51446
246.5	0.50881	0.48918	0.51762
247	0.50834	0.48664	0.52012
247.5	0.50789	0.48425	0.52207
248	0.5074	0.4823	0.52303
248.5	0.50713	0.48035	0.52345
249	0.50663	0.47809	0.52276
249.5	0.5061	0.47675	0.52133
250	0.50552	0.47527	0.51867
250.5	0.50481	0.47363	0.51543
251	0.50402	0.47276	0.51106
251.5	0.50303	0.471	0.50646
252	0.50208	0.46953	0.50121
252.5	0.50103	0.46846	0.49604
253	0.49988	0.46762	0.49112
253.5	0.49848	0.46633	0.48653
254	0.49704	0.46579	0.48239
254.5	0.49541	0.46589	0.47879
255	0.49343	0.46563	0.4756
255.5	0.49105	0.46556	0.47294
256	0.48872	0.46582	0.47082
256.5	0.48616	0.46639	0.46913
257	0.48287	0.46604	0.46817
257.5	0.47967	0.46677	0.46758
258	0.47651	0.4678	0.46795
258.5	0.47286	0.46888	0.46887
259	0.46908	0.47011	0.47019
259.5	0.46538	0.47157	0.47168
260	0.46136	0.47287	0.47339
260.5	0.45716	0.47385	0.47545
261	0.45264	0.47456	0.47803
261.5	0.44806	0.47514	0.48082
262	0.44368	0.4764	0.48398
262.5	0.43923	0.47685	0.48669
263	0.43467	0.47754	0.48942
263.5	0.43035	0.4779	0.49194
264	0.42597	0.47842	0.49423
264.5	0.42129	0.47812	0.49621
265	0.41654	0.4784	0.49778
265.5	0.41182	0.4786	0.49907
266	0.4069	0.47893	0.49973
266.5	0.40171	0.47903	0.49995
267	0.3962	0.4788	0.50017
267.5	0.39017	0.47764	0.5005
268	0.38389	0.47688	0.50069
268.5	0.37712	0.4757	0.50074
269	0.36984	0.47422	0.50083
269.5	0.36233	0.47273	0.50082
270	0.35462	0.47189	0.50133
270.5	0.34614	0.46982	0.50137
271	0.33766	0.46826	0.50197
271.5	0.32887	0.46631	0.50221
272	0.31995	0.46431	0.50323
272.5	0.31094	0.46117	0.50388
273	0.30223	0.45818	0.50463
273.5	0.2933	0.45476	0.50493
274	0.2847	0.45074	0.50493
274.5	0.27619	0.44622	0.50424
275	0.26785	0.4415	0.50293
275.5	0.25968	0.43624	0.50116
276	0.25182	0.42982	0.49881
276.5	0.24412	0.42323	0.49565
277	0.23655	0.41608	0.4919
277.5	0.22928	0.40831	0.48767
278	0.222	0.39986	0.48335
278.5	0.21486	0.39114	0.47823
279	0.20795	0.38222	0.47282
279.5	0.20133	0.37344	0.46758
280	0.19488	0.36451	0.46292
280.5	0.18927	0.35611	0.45891
281	0.18397	0.34797	0.45505
281.5	0.17884	0.33928	0.45193
282	0.17431	0.33103	0.4499
282.5	0.17046	0.32374	0.44889
283	0.16657	0.31617	0.44864
283.5	0.16335	0.30962	0.44867
284	0.1607	0.30399	0.44915
284.5	0.15814	0.29824	0.44986
285	0.15558	0.29288	0.45062
285.5	0.15331	0.28803	0.45153
286	0.15115	0.28327	0.45232
286.5	0.14923	0.27897	0.45322
287	0.14737	0.27568	0.45368
287.5	0.14566	0.27193	0.45357
288	0.14431	0.26917	0.45303
288.5	0.1429	0.26644	0.45217
289	0.14144	0.26414	0.45103
289.5	0.14042	0.26174	0.44958
290	0.13959	0.26029	0.44771
290.5	0.13867	0.25853	0.44577
291	0.13821	0.25701	0.44362
291.5	0.13806	0.25595	0.44186
292	0.13797	0.25494	0.44028
292.5	0.13824	0.25415	0.43883
293	0.13893	0.25416	0.43738
293.5	0.13954	0.25369	0.43661
294	0.14019	0.25297	0.43634
294.5	0.14095	0.25244	0.4362
295	0.14172	0.25213	0.43616
295.5	0.14223	0.25124	0.43604
296	0.14267	0.25099	0.43629
296.5	0.14315	0.25059	0.43624
297	0.1435	0.25023	0.43664
297.5	0.14348	0.24918	0.43697
298	0.14351	0.24803	0.43721
298.5	0.14355	0.24695	0.43717
299	0.14358	0.24594	0.43743
299.5	0.14379	0.24506	0.43807
300	0.14416	0.2439	0.4387
300.5	0.14464	0.24306	0.43924
301	0.14533	0.24216	0.43969
301.5	0.14604	0.24133	0.44032
302	0.1467	0.2398	0.44118
302.5	0.14765	0.23901	0.44224
303	0.14904	0.23847	0.44338
303.5	0.15029	0.23799	0.44449
304	0.15184	0.23793	0.44581
304.5	0.15043	0.24071	0.44782
305	0.14906	0.24272	0.45005
305.5	0.14765	0.2452	0.45177
306	0.14688	0.24805	0.45369
306.5	0.14599	0.24961	0.45528
307	0.14828	0.2493	0.45707
307.5	0.15053	0.24905	0.45784
308	0.15279	0.24843	0.45868
308.5	0.15518	0.24776	0.45866
309	0.15759	0.24669	0.45854
309.5	0.16027	0.24619	0.45821
310	0.16314	0.24613	0.45818
310.5	0.1665	0.24611	0.45777
311	0.16934	0.24508	0.45715
311.5	0.17279	0.24635	0.45667
312	0.17603	0.24586	0.45728
312.5	0.17976	0.24601	0.45764
313	0.18322	0.24597	0.4584
313.5	0.18693	0.24659	0.45879
314	0.19096	0.24728	0.45913
314.5	0.19488	0.249	0.45973
315	0.19848	0.24996	0.45976
315.5	0.20228	0.25153	0.46112
316	0.20616	0.2535	0.46241
316.5	0.20931	0.25424	0.46297
317	0.21311	0.25573	0.46408
317.5	0.21711	0.258	0.46464
318	0.22089	0.25969	0.46658
318.5	0.22497	0.26171	0.46768
319	0.22908	0.26413	0.47005
319.5	0.23332	0.26579	0.47232
320	0.23761	0.26762	0.47433
320.5	0.24212	0.26993	0.47651
321	0.24677	0.27213	0.47806
321.5	0.25175	0.27476	0.47995
322	0.25646	0.27726	0.48138
322.5	0.26271	0.28093	0.48363
323	0.26926	0.28531	0.48644
323.5	0.27596	0.28966	0.48942
324	0.28272	0.29359	0.49214
324.5	0.28974	0.29795	0.4938
325	0.29544	0.30111	0.49595
325.5	0.30159	0.30359	0.4981
326	0.30762	0.30643	0.50069
326.5	0.3143	0.31002	0.50254
327	0.32075	0.31295	0.50427
327.5	0.32752	0.31663	0.50537
328	0.33415	0.32075	0.506
328.5	0.34054	0.32371	0.50662
329	0.34679	0.32736	0.50691
329.5	0.35363	0.3316	0.50747
330	0.36054	0.33564	0.50774
330.5	0.36704	0.33963	0.50723
331	0.37405	0.34485	0.50533
331.5	0.38061	0.34869	0.50307
332	0.38763	0.35296	0.50022
332.5	0.39426	0.35733	0.49771
333	0.40119	0.36188	0.49421
333.5	0.40798	0.36603	0.49071
334	0.4154	0.37107	0.48551
334.5	0.42238	0.37594	0.48011
335	0.4295	0.38025	0.47403
335.5	0.43665	0.38481	0.46826
336	0.44387	0.38988	0.4624
336.5	0.45096	0.39468	0.45519
337	0.45773	0.39893	0.44835
337.5	0.46476	0.40387	0.44051
338	0.4718	0.40794	0.43398
338.5	0.47879	0.41195	0.42682
339	0.4856	0.41645	0.42001
339.5	0.49265	0.42143	0.41296
340	0.49954	0.42626	0.40615
340.5	0.5062	0.43135	0.40029
341	0.51306	0.43667	0.39473
341.5	0.51945	0.44123	0.38963
342	0.52592	0.44596	0.38464
342.5	0.53217	0.44966	0.38076
343	0.53818	0.45379	0.37738
343.5	0.54405	0.45792	0.37446
344	0.55004	0.46216	0.37199
344.5	0.55566	0.46607	0.37022
345	0.56116	0.47054	0.36813
345.5	0.56664	0.47451	0.36668
346	0.57168	0.47786	0.36516
346.5	0.57656	0.48107	0.36501
347	0.58125	0.48496	0.36435
347.5	0.58573	0.48821	0.36423
348	0.59004	0.49174	0.36405
348.5	0.59424	0.4955	0.36434
349	0.59833	0.4986	0.36515
349.5	0.60234	0.50189	0.36589
350	0.60596	0.5057	0.36712
350.5	0.60924	0.50883	0.36873
351	0.61236	0.51169	0.37075
351.5	0.61537	0.51468	0.37317
352	0.61798	0.51736	0.37542
352.5	0.62053	0.51918	0.37827
353	0.62306	0.52173	0.38122
353.5	0.62552	0.52441	0.38446
354	0.62748	0.52678	0.3877
354.5	0.62959	0.52894	0.39164
355	0.6314	0.53131	0.39528
355.5	0.63316	0.53298	0.39904
356	0.63456	0.53467	0.40261
356.5	0.63614	0.53632	0.4064
357	0.63743	0.53825	0.4104
357.5	0.63883	0.53976	0.41455
358	0.64006	0.54142	0.41871
358.5	0.64121	0.54264	0.42309
359	0.642	0.54418	0.42705
359.5	0.64278	0.54499	0.43087
360	0.64337	0.54659	0.43462
360.5	0.64372	0.5476	0.43807
361	0.64403	0.54877	0.44186
361.5	0.64455	0.54974	0.44524
362	0.64463	0.55047	0.44878
362.5	0.64456	0.55106	0.45179
363	0.64448	0.55182	0.45463
363.5	0.64398	0.55196	0.45746
364	0.64321	0.55236	0.46026
364.5	0.64238	0.55275	0.46264
365	0.64143	0.55263	0.46489
365.5	0.64007	0.55211	0.46689
366	0.63903	0.55236	0.46863
366.5	0.63793	0.5521	0.4706
367	0.63644	0.55134	0.47291
367.5	0.63503	0.55166	0.4754
368	0.63343	0.55165	0.4777
368.5	0.63153	0.55112	0.48042
369	0.6295	0.55066	0.48331
369.5	0.62753	0.55076	0.48602
370	0.62531	0.55013	0.48866
370.5	0.62302	0.54961	0.49192
371	0.62047	0.54908	0.49559
371.5	0.61957	0.54882	0.49882
372	0.61853	0.54832	0.50195
372.5	0.61738	0.54748	0.50497
373	0.61615	0.5469	0.50813
373.5	0.61489	0.54584	0.5112
374	0.61136	0.54428	0.5142
374.5	0.60787	0.54274	0.51709
375	0.60419	0.54103	0.51962
375.5	0.60049	0.53911	0.52199
376	0.59658	0.53701	0.52389
376.5	0.59273	0.53529	0.52566
377	0.58871	0.53323	0.52721
377.5	0.58464	0.53089	0.52877
378	0.58047	0.52865	0.53004
378.5	0.57617	0.52644	0.53106
379	0.57189	0.5235	0.53181
379.5	0.56732	0.52074	0.53236
380	0.56271	0.51817	0.53257
380.5	0.55789	0.51527	0.53243
381	0.55296	0.51222	0.53177
381.5	0.54768	0.50917	0.53074
382	0.54232	0.50563	0.5296
382.5	0.53678	0.50179	0.5282
383	0.53116	0.49811	0.52664
383.5	0.5254	0.49432	0.52487
384	0.51957	0.49075	0.52316
384.5	0.51372	0.4871	0.52105
385	0.50777	0.48324	0.5188
385.5	0.50162	0.47901	0.51659
386	0.49515	0.47459	0.51458
386.5	0.48848	0.46959	0.5126
387	0.48171	0.46486	0.51052
387.5	0.4745	0.46001	0.50863
388	0.46728	0.45474	0.50733
388.5	0.46005	0.4496	0.50622
389	0.45279	0.44465	0.50556
389.5	0.44515	0.43888	0.50481
390	0.4376	0.43346	0.5042
390.5	0.42972	0.42807	0.50361
391	0.42161	0.4223	0.50314
391.5	0.41337	0.41633	0.50281
392	0.40501	0.41054	0.5023
392.5	0.3963	0.40427	0.50189
393	0.38747	0.39785	0.50144
393.5	0.37829	0.39116	0.50094
394	0.369	0.38456	0.50024
394.5	0.35968	0.37789	0.49915
395	0.35055	0.3713	0.49817
395.5	0.34151	0.3649	0.49689
396	0.33257	0.3584	0.49545
396.5	0.32365	0.35206	0.49365
397	0.31487	0.34537	0.49198
397.5	0.30614	0.33861	0.49003
398	0.2974	0.33225	0.48777
398.5	0.28925	0.3264	0.48507
399	0.28129	0.32003	0.48229
399.5	0.27336	0.31402	0.47918
400	0.2657	0.30774	0.47592
400.5	0.2585	0.30143	0.47235
401	0.25137	0.29489	0.46851
401.5	0.24465	0.28904	0.46422
402	0.23847	0.28314	0.4599
402.5	0.23272	0.27808	0.45568
403	0.227	0.27295	0.45123
403.5	0.22161	0.26802	0.44659
404	0.2164	0.26323	0.44148
404.5	0.21144	0.25879	0.43644
405	0.20666	0.25455	0.4311
405.5	0.20217	0.2499	0.42579
406	0.19798	0.2457	0.42027
406.5	0.19407	0.24155	0.41459
407	0.19036	0.23791	0.40869
407.5	0.1868	0.23429	0.4027
408	0.18368	0.23128	0.39666
408.5	0.18058	0.2285	0.39062
409	0.17757	0.22582	0.38451
409.5	0.17467	0.2231	0.37833
410	0.1718	0.22014	0.37198
410.5	0.16916	0.21748	0.36571
411	0.16667	0.21444	0.35931
411.5	0.16429	0.21177	0.3532
412	0.16206	0.20906	0.3468
412.5	0.15996	0.2064	0.34068
413	0.15776	0.20384	0.33426
413.5	0.15567	0.20192	0.32793
414	0.15366	0.19963	0.32153
414.5	0.15167	0.1976	0.31546
415	0.14981	0.19586	0.30938
415.5	0.14793	0.19408	0.30331
416	0.14608	0.19192	0.297
416.5	0.14425	0.18992	0.29074
417	0.14258	0.18847	0.28442
417.5	0.14081	0.18645	0.27833
418	0.13916	0.18468	0.27234
418.5	0.13763	0.18313	0.26649
419	0.13596	0.18155	0.2603
419.5	0.13418	0.17942	0.25411
420	0.13253	0.17761	0.24798
420.5	0.13089	0.17559	0.24217
421	0.12935	0.1739	0.23681
421.5	0.1279	0.17231	0.23149
422	0.12656	0.16988	0.22634
422.5	0.12516	0.16847	0.22112
423	0.12372	0.16697	0.21627
423.5	0.12239	0.16549	0.21163
424	0.12113	0.16421	0.207
424.5	0.1199	0.16371	0.20235
425	0.11873	0.16223	0.19777
425.5	0.11758	0.16096	0.1935
426	0.11631	0.15952	0.18937
426.5	0.11512	0.15821	0.18529
427	0.11391	0.15674	0.18133
427.5	0.11281	0.15576	0.1775
428	0.11175	0.1547	0.1738
428.5	0.11066	0.15359	0.17024
429	0.1096	0.15223	0.16688
429.5	0.10864	0.15128	0.16354
430	0.10756	0.14996	0.16036
430.5	0.10643	0.1486	0.15744
431	0.1055	0.14771	0.15467
431.5	0.10472	0.14704	0.15193
432	0.10358	0.14584	0.14928
432.5	0.1027	0.14479	0.14674
433	0.10187	0.14383	0.14424
433.5	0.10087	0.14265	0.14169
434	0.0999	0.14118	0.13937
434.5	0.09906	0.14006	0.13717
435	0.09815	0.13914	0.13499
435.5	0.09743	0.13847	0.133
436	0.09658	0.13742	0.13108
436.5	0.09559	0.13644	0.12932
437	0.09483	0.13556	0.12749
437.5	0.0939	0.13461	0.12563
438	0.09305	0.13365	0.12394
438.5	0.09221	0.13272	0.12211
439	0.09139	0.13164	0.12053
439.5	0.09059	0.13072	0.11882
440	0.08986	0.12966	0.11753
440.5	0.08897	0.12862	0.1161
441	0.08827	0.12794	0.11455
441.5	0.08753	0.12722	0.113
442	0.08665	0.12621	0.11156
442.5	0.08608	0.12566	0.11038
443	0.08534	0.12482	0.10909
443.5	0.0846	0.12383	0.10771
444	0.08396	0.12316	0.10639
444.5	0.08344	0.12253	0.10516
445	0.08261	0.12172	0.10408
445.5	0.08198	0.12091	0.10305
446	0.08131	0.1199	0.102
446.5	0.0806	0.11908	0.10092
447	0.07987	0.11839	0.09982
447.5	0.07913	0.11709	0.09884
448	0.07846	0.11617	0.09791
448.5	0.07782	0.11558	0.09695
449	0.07718	0.11449	0.09581
449.5	0.07655	0.11377	0.09478
450	0.07599	0.11326	0.09368
450.5	0.0754	0.11284	0.09286
451	0.07482	0.11203	0.09185
451.5	0.07418	0.1114	0.09119
452	0.07358	0.11066	0.0903
452.5	0.07294	0.10969	0.08952
453	0.07234	0.10885	0.08858
453.5	0.07167	0.10822	0.08765
454	0.07118	0.10772	0.08678
454.5	0.07056	0.10686	0.08589
455	0.0699	0.10639	0.08521
455.5	0.06924	0.10555	0.08447
456	0.0687	0.10468	0.08372
456.5	0.06807	0.10394	0.08282
457	0.06756	0.10321	0.08215
457.5	0.06714	0.10251	0.08148
458	0.06661	0.1018	0.08093
458.5	0.06603	0.10121	0.08011
459	0.06538	0.1002	0.07934
459.5	0.06473	0.09921	0.07872
460	0.06418	0.09842	0.07818
460.5	0.06367	0.09776	0.07768
461	0.06318	0.09708	0.07681
461.5	0.06278	0.09669	0.07611
462	0.06244	0.09638	0.07529
462.5	0.06203	0.09603	0.07478
463	0.0615	0.09515	0.07419
463.5	0.06107	0.09457	0.07364
464	0.06078	0.09406	0.073
464.5	0.0603	0.09339	0.07238
465	0.05984	0.09261	0.07174
465.5	0.05958	0.09225	0.07107
466	0.05916	0.09165	0.07042
466.5	0.05868	0.09109	0.06982
467	0.05842	0.09068	0.06939
467.5	0.05801	0.09024	0.06878
468	0.05755	0.08946	0.06835
468.5	0.0571	0.08894	0.06758
469	0.05663	0.08806	0.06697
469.5	0.05604	0.08737	0.06626
470	0.05541	0.08643	0.06573
470.5	0.05499	0.08592	0.06516
471	0.0546	0.08501	0.06465
471.5	0.05413	0.08461	0.0642
472	0.05372	0.08385	0.0637
472.5	0.05338	0.0834	0.06322
473	0.05294	0.0829	0.06263
473.5	0.0525	0.08242	0.0621
474	0.05218	0.08162	0.06162
474.5	0.05173	0.08092	0.06115
475	0.05148	0.08044	0.06074
475.5	0.0512	0.07984	0.06014
476	0.05089	0.07924	0.05967
476.5	0.05061	0.07892	0.05936
477	0.05028	0.0786	0.05889
477.5	0.04986	0.07794	0.05844
478	0.04951	0.07737	0.05776
478.5	0.04912	0.07689	0.05721
479	0.04873	0.07623	0.05669
479.5	0.04837	0.07558	0.05627
480	0.04807	0.07495	0.05595
480.5	0.04759	0.07441	0.05556
481	0.04726	0.07375	0.05517
481.5	0.04677	0.07309	0.05468
482	0.04651	0.07275	0.05429
482.5	0.04607	0.07243	0.0539
483	0.04583	0.07202	0.05364
483.5	0.04543	0.07183	0.0533
484	0.04512	0.07137	0.05295
484.5	0.04479	0.07079	0.05254
485	0.04452	0.07033	0.05188
485.5	0.04409	0.0697	0.05142
486	0.04377	0.06926	0.05098
486.5	0.0435	0.06904	0.05072
487	0.04314	0.06858	0.05028
487.5	0.04276	0.06798	0.04985
488	0.04247	0.06769	0.0495
488.5	0.04215	0.06716	0.04914
489	0.04175	0.06672	0.04878
489.5	0.04147	0.06652	0.0483
490	0.04119	0.0662	0.04785
490.5	0.04089	0.06569	0.04729
491	0.04056	0.06511	0.04696
491.5	0.04029	0.06458	0.04663
492	0.03987	0.0637	0.04631
492.5	0.03957	0.06329	0.04592
493	0.03922	0.06289	0.0456
493.5	0.03886	0.0624	0.04529
494	0.03867	0.06191	0.04504
494.5	0.03836	0.06165	0.04459
495	0.03814	0.06144	0.04419
495.5	0.03774	0.06093	0.04379
496	0.03753	0.0605	0.0434
496.5	0.03717	0.06036	0.043
497	0.03682	0.05974	0.04264
497.5	0.03644	0.05924	0.04234
498	0.03625	0.05886	0.04204
498.5	0.0359	0.05864	0.04166
499	0.03553	0.05821	0.0413
499.5	0.0354	0.05819	0.04094
500	0.03512	0.05775	0.04062
500.5	0.03488	0.05742	0.04031
501	0.0347	0.0571	0.04001
501.5	0.03435	0.05647	0.03964
502	0.03394	0.05582	0.03929
502.5	0.03367	0.05529	0.03897
503	0.03339	0.05503	0.03859
503.5	0.03301	0.0545	0.03825
504	0.03284	0.05404	0.03787
504.5	0.03265	0.05374	0.03749
505	0.03249	0.05363	0.0372
505.5	0.03227	0.05313	0.03698
506	0.03208	0.05255	0.03682
506.5	0.03176	0.05224	0.03651
507	0.03158	0.05215	0.03623
507.5	0.03116	0.05157	0.03599
508	0.03082	0.05122	0.03561
508.5	0.03062	0.05129	0.03527
509	0.0304	0.05088	0.0349
509.5	0.03013	0.05043	0.03466
510	0.02997	0.05026	0.03431
510.5	0.02974	0.04989	0.0339
511	0.0294	0.04926	0.03364
511.5	0.02923	0.04902	0.03337
512	0.02903	0.04866	0.03322
512.5	0.02867	0.04805	0.03287
513	0.0284	0.04751	0.03261
513.5	0.02812	0.04704	0.03226
514	0.02777	0.04658	0.03208
514.5	0.02745	0.04606	0.03173
515	0.02727	0.04577	0.03156
515.5	0.02696	0.04535	0.0312
516	0.02682	0.04525	0.03104
516.5	0.02651	0.04492	0.03078
517	0.02621	0.04461	0.03066
517.5	0.02598	0.04415	0.03041
518	0.02585	0.044	0.0301
518.5	0.02557	0.04355	0.02975
519	0.02549	0.04321	0.0294
519.5	0.02528	0.04275	0.02918
520	0.02507	0.04241	0.02892
520.5	0.02493	0.04223	0.02876
521	0.02469	0.04183	0.02854
521.5	0.02445	0.04157	0.02828
522	0.02431	0.04145	0.02806
522.5	0.02411	0.04133	0.02778
523	0.02376	0.04071	0.02753
523.5	0.02358	0.04064	0.02719
524	0.02331	0.04014	0.02681
524.5	0.02306	0.03964	0.02657
525	0.02277	0.03923	0.02626
525.5	0.02269	0.03913	0.02604
526	0.02252	0.03868	0.02577
526.5	0.02229	0.03849	0.02555
527	0.02213	0.03826	0.02531
527.5	0.02202	0.03799	0.02499
528	0.02173	0.03748	0.0249
528.5	0.02145	0.03722	0.02473
529	0.02122	0.03686	0.02458
529.5	0.02099	0.03668	0.02422
530	0.02073	0.03641	0.02398
530.5	0.02055	0.03616	0.02374
531	0.0204	0.03597	0.02352
531.5	0.02025	0.03559	0.02338
532	0.01987	0.03505	0.02312
532.5	0.01957	0.03455	0.02288
533	0.01932	0.0341	0.02252
533.5	0.01902	0.03366	0.02239
534	0.01889	0.0336	0.02212
534.5	0.01879	0.03313	0.02183
535	0.01885	0.03323	0.02162
535.5	0.01885	0.0329	0.02124
536	0.01888	0.03242	0.0212
536.5	0.0188	0.03207	0.02102
537	0.01884	0.03184	0.02113
537.5	0.01864	0.03115	0.02086
538	0.01843	0.03078	0.02069
538.5	0.01824	0.03056	0.02028
539	0.01803	0.03024	0.02004
539.5	0.01794	0.03033	0.01967
540	0.01789	0.03016	0.01955
540.5	0.01781	0.03038	0.01932
541	0.01767	0.02996	0.01909
541.5	0.01766	0.02991	0.01882
542	0.01741	0.02957	0.01861
542.5	0.01724	0.02942	0.01847
543	0.01703	0.02891	0.01832
543.5	0.0168	0.02886	0.01807
544	0.0165	0.02845	0.01783
544.5	0.01643	0.0281	0.01754
545	0.01615	0.02758	0.01737
545.5	0.01598	0.02723	0.01729
546	0.01582	0.02712	0.01702
546.5	0.01558	0.0267	0.01687
547	0.01525	0.02627	0.01662
547.5	0.01512	0.02612	0.0166
548	0.01492	0.0258	0.01648
548.5	0.01477	0.02541	0.01632
549	0.01459	0.02504	0.01615
549.5	0.01438	0.0247	0.01589
550	0.01408	0.02424	0.01565
550.5	0.01389	0.02399	0.01544
551	0.01359	0.02347	0.01528
551.5	0.01342	0.02306	0.01511
552	0.01322	0.02289	0.01485
552.5	0.01312	0.02293	0.0146
553	0.01283	0.02262	0.01443
553.5	0.01264	0.02244	0.01428
554	0.01254	0.02211	0.01407
554.5	0.01235	0.02164	0.01386
555	0.01216	0.02122	0.01369
555.5	0.01205	0.02117	0.01354
556	0.01195	0.02118	0.01325
556.5	0.01179	0.02147	0.01295
557	0.01165	0.0215	0.01267
557.5	0.0115	0.0213	0.01246
558	0.01131	0.02089	0.01231
558.5	0.01112	0.02053	0.01212
559	0.01093	0.02006	0.01193
559.5	0.01085	0.02009	0.01168
560	0.01072	0.0199	0.01156
560.5	0.01066	0.01982	0.01144
561	0.01057	0.01941	0.01133
561.5	0.0104	0.01923	0.01111
562	0.01027	0.01887	0.01085
562.5	0.01017	0.01867	0.01071
563	0.01017	0.01845	0.01044
563.5	0.01003	0.01842	0.01042
564	0.0099	0.01812	0.01018
564.5	0.00974	0.01784	0.01013
565	0.00966	0.01745	0.00994
565.5	0.00942	0.01715	0.00988
566	0.00933	0.01702	0.00972
566.5	0.00922	0.01674	0.00965
567	0.00916	0.01641	0.0095
567.5	0.009	0.01608	0.00943
568	0.00885	0.01569	0.0093
568.5	0.00873	0.01532	0.00913
569	0.00858	0.01513	0.00894
569.5	0.00839	0.01449	0.00866
570	0.00825	0.01426	0.00859
570.5	0.00811	0.01384	0.00838
571	0.00784	0.01342	0.00824
571.5	0.00786	0.01297	0.00801
572	0.00765	0.01273	0.00785
572.5	0.00749	0.01235	0.00762
573	0.00734	0.01218	0.0075
573.5	0.00719	0.01172	0.00735
574	0.00688	0.01146	0.00725
574.5	0.00665	0.01132	0.00703
575	0.00644	0.01127	0.00697
575.5	0.00632	0.01101	0.00683
576	0.0063	0.01111	0.00669
576.5	0.00627	0.01085	0.00648
577	0.0062	0.01053	0.00633
577.5	0.00604	0.01008	0.00622
578	0.00574	0.0098	0.00609
578.5	0.00558	0.00949	0.00582
579	0.00539	0.00942	0.00553
579.5	0.00533	0.00934	0.00532
580	0.00519	0.00939	0.00512
580.5	0.00509	0.00906	0.00507
581	0.00486	0.00879	0.00473
581.5	0.00469	0.00846	0.00472
582	0.00456	0.00835	0.00449
582.5	0.00446	0.00795	0.0045
583	0.00443	0.00783	0.00437
583.5	0.00429	0.00752	0.00421
584	0.00421	0.0075	0.00406
584.5	0.00399	0.00728	0.0039
585	0.00383	0.00704	0.00379
585.5	0.00358	0.00675	0.00367
586	0.00344	0.00647	0.00355
586.5	0.00325	0.00607	0.00344
587	0.00314	0.00561	0.00334
587.5	0.00305	0.00551	0.00323
588	0.00305	0.00538	0.0031
588.5	0.00303	0.00516	0.00293
589	0.00298	0.00488	0.00273
589.5	0.00287	0.00464	0.00255
590	0.00264	0.00415	0.00244
590.5	0.00249	0.00392	0.00231
591	0.00227	0.00375	0.00226
591.5	0.00209	0.0035	0.00219
592	0.00201	0.00347	0.00215
592.5	0.00191	0.00333	0.00206
593	0.0018	0.00315	0.00183
593.5	0.00165	0.00287	0.00159
594	0.00145	0.00254	0.0014
594.5	0.00127	0.00226	0.00142
595	0.00128	0.00204	0.00144
595.5	0.00103	0.00161	0.00138
596	0.000950691	0.00138	0.00124
596.5	0.000896674	0.00113	0.00106
597	0.000731924	0.000877384	0.00095557
597.5	0.000513157	0.000524075	0.000736994
598	0.000434833	0.000235539	0.000624904
598.5	0.000297091	0	0.000465175
599	0.000159349	0.00011777	0.000364294
599.5	8.37256e-05	8.24388e-05	0.000182147
600	0	0.000247316	0
