# Supplementary material for: Achieving Robust Cholesteric Liquid Crystal Polymer Networks with High Luminescence Dissymmetry Factor
Source: Research Square preprint supplement (doi:10.21203/rs.3.rs-7436711/v1), 2025-09-17
Supplement: Supplementary file 10 [file ad62b1bbf14ba8bd425406c6.xlsx]

## Sheet: Sheet1
	FC1		FC6		PC6
8.01938	51	8.00007	80	8.01938	68
8.03978	65	8.02047	75	8.03978	66
8.06019	58	8.04088	62	8.06019	69
8.08059	55	8.06129	72	8.08059	76
8.10099	52	8.0817	84	8.10099	52
8.12139	49	8.1021	64	8.12139	48
8.14179	52	8.12251	66	8.14179	65
8.16219	54	8.14292	70	8.16219	77
8.18259	52	8.16333	74	8.18259	83
8.20299	57	8.18374	72	8.20299	63
8.2234	68	8.20414	71	8.2234	66
8.2438	63	8.22455	63	8.2438	68
8.2642	55	8.24496	66	8.2642	66
8.2846	59	8.26537	84	8.2846	56
8.305	53	8.28578	62	8.305	54
8.3254	50	8.30618	76	8.3254	56
8.3458	51	8.32659	69	8.3458	67
8.3662	49	8.347	68	8.3662	59
8.38661	65	8.36741	60	8.38661	56
8.40701	53	8.38782	86	8.40701	63
8.42741	56	8.40822	65	8.42741	78
8.44781	56	8.42863	51	8.44781	54
8.46821	45	8.44904	86	8.46821	76
8.48861	52	8.46945	60	8.48861	71
8.50901	64	8.48986	67	8.50901	65
8.52941	36	8.51026	76	8.52941	66
8.54982	53	8.53067	66	8.54982	63
8.57022	61	8.55108	88	8.57022	51
8.59062	47	8.57149	74	8.59062	61
8.61102	56	8.59189	62	8.61102	81
8.63142	49	8.6123	70	8.63142	66
8.65182	56	8.63271	68	8.65182	64
8.67222	55	8.65312	62	8.67222	76
8.69262	50	8.67353	53	8.69262	65
8.71303	56	8.69393	73	8.71303	65
8.73343	56	8.71434	57	8.73343	63
8.75383	55	8.73475	72	8.75383	68
8.77423	64	8.75516	58	8.77423	64
8.79463	47	8.77557	63	8.79463	51
8.81503	45	8.79597	71	8.81503	64
8.83543	56	8.81638	67	8.83543	54
8.85583	57	8.83679	78	8.85583	50
8.87624	48	8.8572	79	8.87624	63
8.89664	60	8.87761	77	8.89664	80
8.91704	51	8.89801	54	8.91704	64
8.93744	53	8.91842	56	8.93744	61
8.95784	55	8.93883	68	8.95784	62
8.97824	55	8.95924	67	8.97824	80
8.99864	50	8.97965	67	8.99864	66
9.01904	63	9.00005	71	9.01904	57
9.03945	55	9.02046	54	9.03945	64
9.05985	50	9.04087	69	9.05985	62
9.08025	47	9.06128	72	9.08025	80
9.10065	59	9.08169	62	9.10065	67
9.12105	63	9.10209	73	9.12105	72
9.14145	43	9.1225	83	9.14145	70
9.16185	63	9.14291	89	9.16185	69
9.18225	54	9.16332	69	9.18225	58
9.20266	54	9.18372	58	9.20266	56
9.22306	55	9.20413	66	9.22306	61
9.24346	57	9.22454	66	9.24346	67
9.26386	51	9.24495	68	9.26386	68
9.28426	45	9.26536	65	9.28426	83
9.30466	48	9.28576	79	9.30466	67
9.32506	65	9.30617	62	9.32506	70
9.34546	63	9.32658	47	9.34546	62
9.36587	55	9.34699	68	9.36587	71
9.38627	54	9.3674	61	9.38627	68
9.40667	42	9.3878	77	9.40667	67
9.42707	48	9.40821	67	9.42707	75
9.44747	68	9.42862	78	9.44747	48
9.46787	50	9.44903	65	9.46787	64
9.48827	45	9.46944	65	9.48827	65
9.50867	58	9.48984	62	9.50867	61
9.52908	41	9.51025	60	9.52908	55
9.54948	54	9.53066	65	9.54948	57
9.56988	70	9.55107	71	9.56988	76
9.59028	66	9.57148	67	9.59028	61
9.61068	46	9.59188	62	9.61068	74
9.63108	40	9.61229	88	9.63108	74
9.65148	62	9.6327	69	9.65148	45
9.67188	44	9.65311	63	9.67188	64
9.69229	55	9.67351	88	9.69229	69
9.71269	63	9.69392	59	9.71269	63
9.73309	72	9.71433	67	9.73309	66
9.75349	57	9.73474	74	9.75349	71
9.77389	47	9.75515	64	9.77389	75
9.79429	41	9.77555	70	9.79429	62
9.81469	51	9.79596	61	9.81469	67
9.83509	54	9.81637	75	9.83509	57
9.8555	76	9.83678	73	9.8555	56
9.8759	53	9.85719	77	9.8759	72
9.8963	71	9.87759	59	9.8963	60
9.9167	62	9.898	76	9.9167	63
9.9371	61	9.91841	71	9.9371	58
9.9575	57	9.93882	62	9.9575	62
9.9779	62	9.95923	78	9.9779	70
9.9983	52	9.97963	77	9.9983	79
10.0187	50	10	72	10.0187	54
10.0391	53	10.0204	70	10.0391	64
10.0595	53	10.0409	61	10.0595	54
10.0799	55	10.0613	66	10.0799	69
10.1003	55	10.0817	62	10.1003	53
10.1207	59	10.1021	77	10.1207	61
10.1411	61	10.1225	61	10.1411	69
10.1615	63	10.1429	65	10.1615	57
10.1819	55	10.1633	83	10.1819	68
10.2023	65	10.1837	73	10.2023	63
10.2227	66	10.2041	82	10.2227	58
10.2431	56	10.2245	61	10.2431	63
10.2635	68	10.2449	73	10.2635	62
10.2839	57	10.2653	76	10.2839	65
10.3043	62	10.2858	74	10.3043	75
10.3247	49	10.3062	53	10.3247	58
10.3451	56	10.3266	54	10.3451	82
10.3655	62	10.347	65	10.3655	71
10.3859	67	10.3674	71	10.3859	49
10.4063	61	10.3878	66	10.4063	71
10.4267	57	10.4082	80	10.4267	72
10.4471	53	10.4286	50	10.4471	60
10.4675	65	10.449	74	10.4675	61
10.4879	58	10.4694	68	10.4879	53
10.5083	58	10.4898	71	10.5083	70
10.5287	56	10.5102	68	10.5287	65
10.5491	52	10.5306	73	10.5491	68
10.5695	60	10.5511	77	10.5695	69
10.5899	62	10.5715	85	10.5899	47
10.6103	62	10.5919	79	10.6103	71
10.6307	50	10.6123	62	10.6307	65
10.6511	51	10.6327	59	10.6511	69
10.6715	56	10.6531	74	10.6715	63
10.6919	51	10.6735	68	10.6919	63
10.7123	59	10.6939	86	10.7123	60
10.7327	59	10.7143	55	10.7327	82
10.7531	76	10.7347	55	10.7531	65
10.7736	59	10.7551	81	10.7736	62
10.794	68	10.7755	80	10.794	60
10.8144	57	10.796	79	10.8144	75
10.8348	51	10.8164	76	10.8348	62
10.8552	64	10.8368	65	10.8552	72
10.8756	47	10.8572	74	10.8756	74
10.896	62	10.8776	79	10.896	62
10.9164	62	10.898	79	10.9164	70
10.9368	51	10.9184	78	10.9368	63
10.9572	44	10.9388	72	10.9572	70
10.9776	56	10.9592	54	10.9776	62
10.998	59	10.9796	72	10.998	63
11.0184	64	11	71	11.0184	71
11.0388	59	11.0204	68	11.0388	68
11.0592	58	11.0408	82	11.0592	59
11.0796	62	11.0613	84	11.0796	55
11.1	59	11.0817	69	11.1	68
11.1204	54	11.1021	59	11.1204	78
11.1408	64	11.1225	58	11.1408	83
11.1612	51	11.1429	65	11.1612	59
11.1816	51	11.1633	66	11.1816	62
11.202	62	11.1837	73	11.202	66
11.2224	46	11.2041	77	11.2224	68
11.2428	64	11.2245	82	11.2428	49
11.2632	66	11.2449	71	11.2632	62
11.2836	47	11.2653	78	11.2836	66
11.304	66	11.2857	62	11.304	56
11.3244	47	11.3061	56	11.3244	68
11.3448	53	11.3266	87	11.3448	57
11.3652	62	11.347	59	11.3652	56
11.3856	68	11.3674	66	11.3856	59
11.406	54	11.3878	78	11.406	62
11.4264	50	11.4082	72	11.4264	59
11.4468	55	11.4286	70	11.4468	67
11.4672	50	11.449	79	11.4672	55
11.4876	48	11.4694	69	11.4876	62
11.508	71	11.4898	69	11.508	68
11.5284	56	11.5102	76	11.5284	82
11.5488	51	11.5306	65	11.5488	60
11.5692	61	11.551	75	11.5692	72
11.5896	60	11.5715	73	11.5896	55
11.61	53	11.5919	67	11.61	69
11.6304	69	11.6123	60	11.6304	67
11.6508	63	11.6327	59	11.6508	63
11.6712	64	11.6531	70	11.6712	64
11.6916	65	11.6735	87	11.6916	50
11.712	58	11.6939	83	11.712	55
11.7324	66	11.7143	55	11.7324	50
11.7528	58	11.7347	68	11.7528	64
11.7732	55	11.7551	86	11.7732	71
11.7936	53	11.7755	57	11.7936	80
11.814	61	11.7959	79	11.814	72
11.8344	51	11.8163	63	11.8344	61
11.8548	52	11.8368	77	11.8548	73
11.8752	51	11.8572	56	11.8752	57
11.8956	63	11.8776	94	11.8956	44
11.916	55	11.898	74	11.916	67
11.9364	59	11.9184	53	11.9364	59
11.9568	61	11.9388	88	11.9568	70
11.9772	71	11.9592	78	11.9772	59
11.9976	65	11.9796	73	11.9976	68
12.018	56	12	66	12.018	52
12.0384	60	12.0204	65	12.0384	70
12.0588	47	12.0408	69	12.0588	57
12.0792	65	12.0612	63	12.0792	65
12.0996	47	12.0817	64	12.0996	54
12.12	67	12.1021	68	12.12	61
12.1404	67	12.1225	75	12.1404	73
12.1608	53	12.1429	60	12.1608	56
12.1812	63	12.1633	64	12.1812	44
12.2016	61	12.1837	68	12.2016	65
12.222	47	12.2041	75	12.222	68
12.2424	53	12.2245	61	12.2424	59
12.2628	43	12.2449	73	12.2628	67
12.2832	67	12.2653	80	12.2832	57
12.3036	46	12.2857	70	12.3036	66
12.324	59	12.3061	54	12.324	54
12.3444	79	12.3265	82	12.3444	68
12.3648	60	12.347	80	12.3648	82
12.3852	54	12.3674	67	12.3852	74
12.4057	48	12.3878	61	12.4057	59
12.4261	68	12.4082	80	12.4261	73
12.4465	70	12.4286	57	12.4465	61
12.4669	70	12.449	59	12.4669	52
12.4873	58	12.4694	63	12.4873	70
12.5077	56	12.4898	64	12.5077	71
12.5281	62	12.5102	58	12.5281	63
12.5485	68	12.5306	65	12.5485	54
12.5689	68	12.551	57	12.5689	68
12.5893	56	12.5714	66	12.5893	51
12.6097	50	12.5918	67	12.6097	57
12.6301	75	12.6123	59	12.6301	53
12.6505	60	12.6327	79	12.6505	66
12.6709	80	12.6531	75	12.6709	56
12.6913	53	12.6735	46	12.6913	71
12.7117	62	12.6939	71	12.7117	76
12.7321	52	12.7143	68	12.7321	63
12.7525	61	12.7347	61	12.7525	59
12.7729	63	12.7551	73	12.7729	80
12.7933	59	12.7755	76	12.7933	67
12.8137	57	12.7959	71	12.8137	70
12.8341	57	12.8163	55	12.8341	69
12.8545	52	12.8367	84	12.8545	69
12.8749	53	12.8572	61	12.8749	60
12.8953	54	12.8776	61	12.8953	54
12.9157	67	12.898	58	12.9157	59
12.9361	62	12.9184	69	12.9361	63
12.9565	66	12.9388	79	12.9565	66
12.9769	68	12.9592	69	12.9769	71
12.9973	66	12.9796	60	12.9973	56
13.0177	58	13	62	13.0177	58
13.0381	44	13.0204	63	13.0381	75
13.0585	48	13.0408	69	13.0585	84
13.0789	59	13.0612	83	13.0789	69
13.0993	59	13.0816	61	13.0993	53
13.1197	69	13.102	73	13.1197	66
13.1401	58	13.1225	61	13.1401	77
13.1605	63	13.1429	62	13.1605	61
13.1809	77	13.1633	69	13.1809	60
13.2013	73	13.1837	59	13.2013	66
13.2217	50	13.2041	63	13.2217	64
13.2421	56	13.2245	61	13.2421	77
13.2625	72	13.2449	57	13.2625	69
13.2829	68	13.2653	78	13.2829	75
13.3033	42	13.2857	65	13.3033	55
13.3237	63	13.3061	60	13.3237	66
13.3441	56	13.3265	64	13.3441	75
13.3645	62	13.3469	66	13.3645	54
13.3849	64	13.3673	54	13.3849	75
13.4053	57	13.3878	71	13.4053	60
13.4257	50	13.4082	67	13.4257	60
13.4461	55	13.4286	62	13.4461	65
13.4665	62	13.449	60	13.4665	69
13.4869	60	13.4694	71	13.4869	71
13.5073	60	13.4898	67	13.5073	72
13.5277	81	13.5102	65	13.5277	58
13.5481	53	13.5306	55	13.5481	60
13.5685	61	13.551	61	13.5685	71
13.5889	64	13.5714	75	13.5889	63
13.6093	59	13.5918	55	13.6093	71
13.6297	67	13.6122	76	13.6297	65
13.6501	59	13.6327	68	13.6501	60
13.6705	71	13.6531	62	13.6705	60
13.6909	45	13.6735	70	13.6909	65
13.7113	53	13.6939	74	13.7113	65
13.7317	66	13.7143	77	13.7317	68
13.7521	56	13.7347	52	13.7521	64
13.7725	70	13.7551	60	13.7725	70
13.7929	63	13.7755	55	13.7929	80
13.8133	70	13.7959	64	13.8133	75
13.8337	56	13.8163	59	13.8337	65
13.8541	65	13.8367	58	13.8541	62
13.8745	49	13.8571	69	13.8745	74
13.8949	62	13.8775	47	13.8949	73
13.9153	53	13.898	69	13.9153	61
13.9357	80	13.9184	76	13.9357	70
13.9561	58	13.9388	72	13.9561	79
13.9765	53	13.9592	69	13.9765	80
13.9969	61	13.9796	67	13.9969	73
14.0173	72	14	60	14.0173	62
14.0377	64	14.0204	60	14.0377	59
14.0582	57	14.0408	71	14.0582	62
14.0786	61	14.0612	62	14.0786	61
14.099	57	14.0816	72	14.099	61
14.1194	57	14.102	72	14.1194	58
14.1398	66	14.1224	75	14.1398	50
14.1602	64	14.1429	62	14.1602	76
14.1806	66	14.1633	79	14.1806	59
14.201	63	14.1837	60	14.201	77
14.2214	61	14.2041	71	14.2214	50
14.2418	53	14.2245	52	14.2418	70
14.2622	61	14.2449	66	14.2622	63
14.2826	53	14.2653	67	14.2826	78
14.303	64	14.2857	73	14.303	57
14.3234	62	14.3061	71	14.3234	59
14.3438	58	14.3265	65	14.3438	63
14.3642	64	14.3469	59	14.3642	52
14.3846	64	14.3673	64	14.3846	67
14.405	39	14.3877	60	14.405	75
14.4254	67	14.4082	67	14.4254	55
14.4458	57	14.4286	67	14.4458	62
14.4662	57	14.449	69	14.4662	65
14.4866	59	14.4694	67	14.4866	49
14.507	56	14.4898	77	14.507	58
14.5274	64	14.5102	76	14.5274	69
14.5478	70	14.5306	56	14.5478	68
14.5682	51	14.551	70	14.5682	72
14.5886	57	14.5714	71	14.5886	71
14.609	68	14.5918	60	14.609	76
14.6294	56	14.6122	69	14.6294	64
14.6498	49	14.6326	69	14.6498	44
14.6702	62	14.653	69	14.6702	65
14.6906	68	14.6735	69	14.6906	68
14.711	73	14.6939	57	14.711	52
14.7314	55	14.7143	63	14.7314	72
14.7518	58	14.7347	66	14.7518	71
14.7722	62	14.7551	59	14.7722	66
14.7926	52	14.7755	64	14.7926	86
14.813	50	14.7959	61	14.813	75
14.8334	66	14.8163	67	14.8334	67
14.8538	56	14.8367	58	14.8538	54
14.8742	65	14.8571	64	14.8742	53
14.8946	76	14.8775	64	14.8946	51
14.915	63	14.8979	79	14.915	61
14.9354	64	14.9184	72	14.9354	63
14.9558	63	14.9388	57	14.9558	56
14.9762	60	14.9592	76	14.9762	55
14.9966	69	14.9796	62	14.9966	66
15.017	70	15	72	15.017	74
15.0374	59	15.0204	56	15.0374	63
15.0578	55	15.0408	79	15.0578	54
15.0782	65	15.0612	69	15.0782	55
15.0986	58	15.0816	52	15.0986	61
15.119	58	15.102	55	15.119	61
15.1394	75	15.1224	65	15.1394	72
15.1598	56	15.1428	63	15.1598	75
15.1802	65	15.1632	68	15.1802	60
15.2006	54	15.1837	71	15.2006	70
15.221	82	15.2041	82	15.221	72
15.2414	51	15.2245	64	15.2414	71
15.2618	54	15.2449	74	15.2618	55
15.2822	57	15.2653	67	15.2822	81
15.3026	67	15.2857	61	15.3026	65
15.323	64	15.3061	58	15.323	58
15.3434	63	15.3265	71	15.3434	73
15.3638	61	15.3469	70	15.3638	56
15.3842	77	15.3673	76	15.3842	49
15.4046	57	15.3877	58	15.4046	63
15.425	56	15.4081	66	15.425	59
15.4454	69	15.4285	58	15.4454	64
15.4658	69	15.449	71	15.4658	64
15.4862	76	15.4694	67	15.4862	63
15.5066	61	15.4898	76	15.5066	60
15.527	58	15.5102	69	15.527	66
15.5474	48	15.5306	64	15.5474	69
15.5678	65	15.551	62	15.5678	63
15.5882	78	15.5714	65	15.5882	53
15.6086	56	15.5918	55	15.6086	60
15.629	63	15.6122	72	15.629	51
15.6494	50	15.6326	69	15.6494	76
15.6698	57	15.653	84	15.6698	66
15.6902	76	15.6734	61	15.6902	77
15.7107	40	15.6939	75	15.7107	60
15.7311	57	15.7143	74	15.7311	64
15.7515	79	15.7347	75	15.7515	58
15.7719	68	15.7551	75	15.7719	77
15.7923	59	15.7755	72	15.7923	67
15.8127	73	15.7959	61	15.8127	77
15.8331	58	15.8163	79	15.8331	88
15.8535	75	15.8367	78	15.8535	73
15.8739	65	15.8571	73	15.8739	70
15.8943	61	15.8775	78	15.8943	64
15.9147	77	15.8979	67	15.9147	59
15.9351	65	15.9183	61	15.9351	57
15.9555	53	15.9387	58	15.9555	66
15.9759	53	15.9592	85	15.9759	78
15.9963	66	15.9796	59	15.9963	66
16.0167	69	16	69	16.0167	59
16.0371	62	16.0204	66	16.0371	58
16.0575	53	16.0408	75	16.0575	62
16.0779	61	16.0612	80	16.0779	67
16.0983	52	16.0816	62	16.0983	53
16.1187	65	16.102	64	16.1187	71
16.1391	60	16.1224	58	16.1391	81
16.1595	66	16.1428	79	16.1595	74
16.1799	73	16.1632	64	16.1799	60
16.2003	74	16.1836	71	16.2003	84
16.2207	69	16.2041	64	16.2207	58
16.2411	65	16.2245	70	16.2411	61
16.2615	49	16.2449	77	16.2615	84
16.2819	69	16.2653	50	16.2819	67
16.3023	69	16.2857	75	16.3023	71
16.3227	49	16.3061	78	16.3227	63
16.3431	49	16.3265	69	16.3431	66
16.3635	69	16.3469	66	16.3635	62
16.3839	65	16.3673	82	16.3839	64
16.4043	47	16.3877	67	16.4043	76
16.4247	67	16.4081	70	16.4247	70
16.4451	56	16.4285	75	16.4451	74
16.4655	54	16.4489	75	16.4655	62
16.4859	53	16.4694	64	16.4859	72
16.5063	64	16.4898	66	16.5063	59
16.5267	52	16.5102	75	16.5267	80
16.5471	64	16.5306	75	16.5471	71
16.5675	53	16.551	84	16.5675	68
16.5879	64	16.5714	72	16.5879	83
16.6083	71	16.5918	57	16.6083	71
16.6287	55	16.6122	81	16.6287	62
16.6491	61	16.6326	71	16.6491	61
16.6695	67	16.653	72	16.6695	65
16.6899	55	16.6734	89	16.6899	62
16.7103	61	16.6938	78	16.7103	64
16.7307	77	16.7142	79	16.7307	73
16.7511	58	16.7347	66	16.7511	69
16.7715	58	16.7551	76	16.7715	81
16.7919	60	16.7755	77	16.7919	64
16.8123	57	16.7959	102	16.8123	72
16.8327	71	16.8163	71	16.8327	64
16.8531	49	16.8367	62	16.8531	71
16.8735	63	16.8571	77	16.8735	55
16.8939	71	16.8775	92	16.8939	62
16.9143	58	16.8979	58	16.9143	67
16.9347	59	16.9183	66	16.9347	68
16.9551	66	16.9387	87	16.9551	69
16.9755	59	16.9591	62	16.9755	64
16.9959	71	16.9796	76	16.9959	64
17.0163	64	17	56	17.0163	95
17.0367	66	17.0204	83	17.0367	77
17.0571	63	17.0408	70	17.0571	83
17.0775	68	17.0612	80	17.0775	81
17.0979	62	17.0816	67	17.0979	61
17.1183	65	17.102	68	17.1183	70
17.1387	65	17.1224	77	17.1387	67
17.1591	67	17.1428	76	17.1591	78
17.1795	70	17.1632	71	17.1795	57
17.1999	81	17.1836	88	17.1999	72
17.2203	85	17.204	79	17.2203	68
17.2407	61	17.2244	72	17.2407	65
17.2611	75	17.2449	68	17.2611	64
17.2815	67	17.2653	78	17.2815	77
17.3019	53	17.2857	87	17.3019	75
17.3223	56	17.3061	85	17.3223	67
17.3428	62	17.3265	79	17.3428	69
17.3632	60	17.3469	77	17.3632	70
17.3836	68	17.3673	103	17.3836	72
17.404	81	17.3877	64	17.404	81
17.4244	67	17.4081	66	17.4244	56
17.4448	59	17.4285	69	17.4448	56
17.4652	71	17.4489	79	17.4652	81
17.4856	68	17.4693	84	17.4856	85
17.506	62	17.4898	72	17.506	77
17.5264	69	17.5102	79	17.5264	69
17.5468	62	17.5306	79	17.5468	73
17.5672	71	17.551	81	17.5672	63
17.5876	63	17.5714	80	17.5876	75
17.608	78	17.5918	78	17.608	75
17.6284	64	17.6122	72	17.6284	74
17.6488	64	17.6326	76	17.6488	86
17.6692	69	17.653	90	17.6692	67
17.6896	76	17.6734	71	17.6896	72
17.71	67	17.6938	81	17.71	70
17.7304	75	17.7142	68	17.7304	80
17.7508	60	17.7346	69	17.7508	81
17.7712	83	17.7551	98	17.7712	84
17.7916	75	17.7755	79	17.7916	65
17.812	76	17.7959	95	17.812	70
17.8324	75	17.8163	79	17.8324	82
17.8528	78	17.8367	90	17.8528	73
17.8732	63	17.8571	72	17.8732	71
17.8936	81	17.8775	85	17.8936	87
17.914	72	17.8979	74	17.914	71
17.9344	76	17.9183	82	17.9344	79
17.9548	71	17.9387	90	17.9548	66
17.9752	72	17.9591	91	17.9752	76
17.9956	69	17.9795	95	17.9956	72
18.016	68	17.9999	109	18.016	82
18.0364	66	18.0204	75	18.0364	76
18.0568	67	18.0408	82	18.0568	70
18.0772	68	18.0612	87	18.0772	68
18.0976	75	18.0816	78	18.0976	84
18.118	75	18.102	79	18.118	75
18.1384	55	18.1224	98	18.1384	88
18.1588	92	18.1428	81	18.1588	84
18.1792	91	18.1632	88	18.1792	85
18.1996	67	18.1836	80	18.1996	62
18.22	90	18.204	72	18.22	87
18.2404	80	18.2244	91	18.2404	78
18.2608	85	18.2448	71	18.2608	74
18.2812	70	18.2653	88	18.2812	94
18.3016	87	18.2857	100	18.3016	61
18.322	81	18.3061	99	18.322	66
18.3424	67	18.3265	91	18.3424	71
18.3628	77	18.3469	85	18.3628	103
18.3832	80	18.3673	78	18.3832	74
18.4036	63	18.3877	85	18.4036	97
18.424	66	18.4081	83	18.424	85
18.4444	68	18.4285	88	18.4444	83
18.4648	90	18.4489	89	18.4648	79
18.4852	70	18.4693	88	18.4852	83
18.5056	58	18.4897	107	18.5056	77
18.526	77	18.5101	79	18.526	85
18.5464	77	18.5306	86	18.5464	89
18.5668	83	18.551	96	18.5668	75
18.5872	84	18.5714	110	18.5872	72
18.6076	75	18.5918	89	18.6076	88
18.628	83	18.6122	89	18.628	94
18.6484	72	18.6326	80	18.6484	77
18.6688	80	18.653	95	18.6688	81
18.6892	78	18.6734	101	18.6892	77
18.7096	87	18.6938	80	18.7096	86
18.73	84	18.7142	90	18.73	96
18.7504	92	18.7346	96	18.7504	82
18.7708	61	18.755	97	18.7708	77
18.7912	85	18.7754	85	18.7912	79
18.8116	85	18.7959	103	18.8116	102
18.832	98	18.8163	86	18.832	94
18.8524	85	18.8367	97	18.8524	81
18.8728	85	18.8571	87	18.8728	84
18.8932	92	18.8775	86	18.8932	78
18.9136	71	18.8979	90	18.9136	95
18.934	80	18.9183	87	18.934	89
18.9544	72	18.9387	96	18.9544	89
18.9748	80	18.9591	92	18.9748	100
18.9953	80	18.9795	95	18.9953	83
19.0157	77	18.9999	91	19.0157	79
19.0361	72	19.0203	98	19.0361	70
19.0565	91	19.0408	79	19.0565	89
19.0769	87	19.0612	83	19.0769	85
19.0973	72	19.0816	89	19.0973	97
19.1177	69	19.102	86	19.1177	91
19.1381	82	19.1224	96	19.1381	82
19.1585	93	19.1428	72	19.1585	106
19.1789	78	19.1632	89	19.1789	82
19.1993	73	19.1836	82	19.1993	78
19.2197	62	19.204	93	19.2197	94
19.2401	69	19.2244	83	19.2401	90
19.2605	90	19.2448	106	19.2605	108
19.2809	72	19.2652	105	19.2809	92
19.3013	89	19.2856	81	19.3013	83
19.3217	86	19.3061	119	19.3217	88
19.3421	76	19.3265	105	19.3421	101
19.3625	87	19.3469	105	19.3625	94
19.3829	92	19.3673	94	19.3829	88
19.4033	81	19.3877	94	19.4033	92
19.4237	89	19.4081	103	19.4237	97
19.4441	82	19.4285	91	19.4441	82
19.4645	85	19.4489	87	19.4645	91
19.4849	81	19.4693	99	19.4849	81
19.5053	62	19.4897	98	19.5053	92
19.5257	90	19.5101	91	19.5257	74
19.5461	88	19.5305	97	19.5461	105
19.5665	107	19.551	83	19.5665	96
19.5869	94	19.5714	88	19.5869	106
19.6073	104	19.5918	90	19.6073	93
19.6277	101	19.6122	99	19.6277	97
19.6481	85	19.6326	100	19.6481	89
19.6685	107	19.653	106	19.6685	101
19.6889	87	19.6734	107	19.6889	87
19.7093	82	19.6938	101	19.7093	84
19.7297	73	19.7142	103	19.7297	87
19.7501	97	19.7346	94	19.7501	84
19.7705	91	19.755	86	19.7705	95
19.7909	84	19.7754	88	19.7909	97
19.8113	88	19.7958	87	19.8113	88
19.8317	69	19.8163	98	19.8317	71
19.8521	84	19.8367	93	19.8521	105
19.8725	103	19.8571	84	19.8725	91
19.8929	80	19.8775	84	19.8929	83
19.9133	92	19.8979	87	19.9133	103
19.9337	87	19.9183	86	19.9337	99
19.9541	103	19.9387	95	19.9541	95
19.9745	99	19.9591	96	19.9745	92
19.9949	93	19.9795	98	19.9949	97
20.0153	84	19.9999	103	20.0153	79
20.0357	96	20.0203	112	20.0357	91
20.0561	89	20.0407	108	20.0561	111
20.0765	86	20.0611	110	20.0765	91
20.0969	90	20.0816	110	20.0969	98
20.1173	90	20.102	79	20.1173	91
20.1377	90	20.1224	104	20.1377	98
20.1581	92	20.1428	94	20.1581	110
20.1785	95	20.1632	81	20.1785	82
20.1989	101	20.1836	103	20.1989	92
20.2193	85	20.204	94	20.2193	104
20.2397	91	20.2244	83	20.2397	105
20.2601	85	20.2448	91	20.2601	111
20.2805	81	20.2652	106	20.2805	97
20.3009	97	20.2856	82	20.3009	95
20.3213	87	20.306	110	20.3213	90
20.3417	90	20.3265	108	20.3417	104
20.3621	97	20.3469	97	20.3621	88
20.3825	84	20.3673	105	20.3825	102
20.4029	88	20.3877	102	20.4029	105
20.4233	107	20.4081	107	20.4233	97
20.4437	78	20.4285	84	20.4437	83
20.4641	88	20.4489	101	20.4641	99
20.4845	92	20.4693	98	20.4845	94
20.5049	79	20.4897	108	20.5049	106
20.5253	96	20.5101	92	20.5253	98
20.5457	92	20.5305	87	20.5457	90
20.5661	86	20.5509	105	20.5661	106
20.5865	87	20.5713	104	20.5865	103
20.6069	82	20.5918	89	20.6069	97
20.6273	80	20.6122	96	20.6273	103
20.6478	84	20.6326	85	20.6478	114
20.6682	96	20.653	94	20.6682	108
20.6886	101	20.6734	96	20.6886	94
20.709	78	20.6938	109	20.709	75
20.7294	80	20.7142	108	20.7294	92
20.7498	110	20.7346	103	20.7498	98
20.7702	90	20.755	85	20.7702	110
20.7906	86	20.7754	108	20.7906	97
20.811	79	20.7958	122	20.811	112
20.8314	90	20.8162	100	20.8314	102
20.8518	85	20.8366	108	20.8518	112
20.8722	87	20.8571	114	20.8722	103
20.8926	87	20.8775	126	20.8926	100
20.913	97	20.8979	108	20.913	100
20.9334	92	20.9183	101	20.9334	89
20.9538	103	20.9387	110	20.9538	80
20.9742	94	20.9591	121	20.9742	86
20.9946	87	20.9795	106	20.9946	93
21.015	84	20.9999	90	21.015	93
21.0354	92	21.0203	96	21.0354	96
21.0558	96	21.0407	117	21.0558	92
21.0762	107	21.0611	112	21.0762	82
21.0966	81	21.0815	104	21.0966	103
21.117	83	21.102	104	21.117	87
21.1374	100	21.1224	96	21.1374	104
21.1578	99	21.1428	117	21.1578	98
21.1782	110	21.1632	107	21.1782	100
21.1986	93	21.1836	105	21.1986	101
21.219	88	21.204	87	21.219	93
21.2394	96	21.2244	88	21.2394	91
21.2598	93	21.2448	97	21.2598	90
21.2802	84	21.2652	132	21.2802	96
21.3006	88	21.2856	93	21.3006	115
21.321	82	21.306	103	21.321	76
21.3414	95	21.3264	111	21.3414	100
21.3618	89	21.3468	109	21.3618	95
21.3822	99	21.3673	106	21.3822	84
21.4026	99	21.3877	84	21.4026	99
21.423	93	21.4081	114	21.423	90
21.4434	105	21.4285	83	21.4434	101
21.4638	83	21.4489	101	21.4638	88
21.4842	84	21.4693	99	21.4842	97
21.5046	98	21.4897	101	21.5046	105
21.525	84	21.5101	106	21.525	93
21.5454	102	21.5305	85	21.5454	102
21.5658	96	21.5509	114	21.5658	89
21.5862	102	21.5713	103	21.5862	98
21.6066	95	21.5917	107	21.6066	116
21.627	83	21.6122	100	21.627	90
21.6474	97	21.6326	94	21.6474	115
21.6678	116	21.653	112	21.6678	102
21.6882	81	21.6734	108	21.6882	84
21.7086	84	21.6938	109	21.7086	109
21.729	82	21.7142	97	21.729	104
21.7494	77	21.7346	91	21.7494	103
21.7698	95	21.755	82	21.7698	86
21.7902	104	21.7754	103	21.7902	92
21.8106	83	21.7958	93	21.8106	110
21.831	90	21.8162	109	21.831	81
21.8514	99	21.8366	86	21.8514	87
21.8718	85	21.857	79	21.8718	113
21.8922	76	21.8775	97	21.8922	83
21.9126	91	21.8979	119	21.9126	93
21.933	97	21.9183	107	21.933	91
21.9534	89	21.9387	118	21.9534	108
21.9738	77	21.9591	96	21.9738	97
21.9942	99	21.9795	105	21.9942	106
22.0146	82	21.9999	108	22.0146	89
22.035	110	22.0203	96	22.035	86
22.0554	90	22.0407	122	22.0554	106
22.0758	92	22.0611	98	22.0758	94
22.0962	73	22.0815	95	22.0962	106
22.1166	81	22.1019	94	22.1166	103
22.137	97	22.1223	91	22.137	104
22.1574	80	22.1428	105	22.1574	87
22.1778	87	22.1632	103	22.1778	88
22.1982	82	22.1836	95	22.1982	98
22.2186	88	22.204	98	22.2186	105
22.239	93	22.2244	106	22.239	109
22.2594	107	22.2448	100	22.2594	115
22.2799	96	22.2652	87	22.2799	94
22.3003	76	22.2856	124	22.3003	98
22.3207	96	22.306	86	22.3207	89
22.3411	77	22.3264	100	22.3411	101
22.3615	91	22.3468	87	22.3615	88
22.3819	96	22.3672	107	22.3819	91
22.4023	90	22.3877	110	22.4023	105
22.4227	91	22.4081	104	22.4227	111
22.4431	70	22.4285	83	22.4431	88
22.4635	75	22.4489	79	22.4635	91
22.4839	103	22.4693	89	22.4839	98
22.5043	67	22.4897	83	22.5043	90
22.5247	85	22.5101	76	22.5247	103
22.5451	97	22.5305	106	22.5451	85
22.5655	103	22.5509	81	22.5655	106
22.5859	82	22.5713	85	22.5859	84
22.6063	86	22.5917	91	22.6063	91
22.6267	82	22.6121	86	22.6267	93
22.6471	93	22.6325	107	22.6471	87
22.6675	85	22.653	94	22.6675	87
22.6879	89	22.6734	106	22.6879	70
22.7083	85	22.6938	98	22.7083	85
22.7287	96	22.7142	124	22.7287	87
22.7491	86	22.7346	100	22.7491	83
22.7695	89	22.755	96	22.7695	89
22.7899	86	22.7754	79	22.7899	91
22.8103	101	22.7958	113	22.8103	78
22.8307	102	22.8162	87	22.8307	104
22.8511	75	22.8366	97	22.8511	107
22.8715	81	22.857	79	22.8715	88
22.8919	89	22.8774	95	22.8919	81
22.9123	102	22.8979	83	22.9123	101
22.9327	100	22.9183	89	22.9327	81
22.9531	78	22.9387	93	22.9531	75
22.9735	81	22.9591	90	22.9735	91
22.9939	89	22.9795	86	22.9939	103
23.0143	87	22.9999	92	23.0143	91
23.0347	80	23.0203	76	23.0347	90
23.0551	80	23.0407	90	23.0551	94
23.0755	76	23.0611	97	23.0755	88
23.0959	77	23.0815	99	23.0959	113
23.1163	85	23.1019	70	23.1163	107
23.1367	81	23.1223	96	23.1367	96
23.1571	86	23.1427	70	23.1571	86
23.1775	82	23.1632	92	23.1775	97
23.1979	85	23.1836	86	23.1979	75
23.2183	80	23.204	78	23.2183	84
23.2387	82	23.2244	87	23.2387	91
23.2591	77	23.2448	81	23.2591	88
23.2795	83	23.2652	100	23.2795	101
23.2999	86	23.2856	90	23.2999	89
23.3203	93	23.306	89	23.3203	82
23.3407	93	23.3264	84	23.3407	71
23.3611	87	23.3468	100	23.3611	80
23.3815	79	23.3672	95	23.3815	72
23.4019	67	23.3876	69	23.4019	96
23.4223	91	23.408	106	23.4223	85
23.4427	86	23.4285	78	23.4427	86
23.4631	89	23.4489	95	23.4631	83
23.4835	73	23.4693	76	23.4835	73
23.5039	67	23.4897	81	23.5039	84
23.5243	85	23.5101	85	23.5243	98
23.5447	97	23.5305	82	23.5447	89
23.5651	71	23.5509	77	23.5651	69
23.5855	81	23.5713	70	23.5855	82
23.6059	83	23.5917	78	23.6059	71
23.6263	82	23.6121	86	23.6263	82
23.6467	81	23.6325	91	23.6467	92
23.6671	71	23.6529	86	23.6671	95
23.6875	90	23.6734	89	23.6875	61
23.7079	62	23.6938	88	23.7079	77
23.7283	82	23.7142	81	23.7283	81
23.7487	76	23.7346	89	23.7487	87
23.7691	81	23.755	87	23.7691	85
23.7895	87	23.7754	87	23.7895	72
23.8099	90	23.7958	87	23.8099	81
23.8303	75	23.8162	82	23.8303	78
23.8507	71	23.8366	78	23.8507	100
23.8711	86	23.857	78	23.8711	100
23.8915	74	23.8774	85	23.8915	79
23.9119	74	23.8978	99	23.9119	92
23.9324	91	23.9182	102	23.9324	76
23.9528	72	23.9387	90	23.9528	63
23.9732	83	23.9591	65	23.9732	77
23.9936	76	23.9795	89	23.9936	75
24.014	77	23.9999	81	24.014	90
24.0344	79	24.0203	71	24.0344	98
24.0548	72	24.0407	83	24.0548	80
24.0752	72	24.0611	108	24.0752	97
24.0956	81	24.0815	90	24.0956	81
24.116	81	24.1019	82	24.116	86
24.1364	77	24.1223	75	24.1364	74
24.1568	77	24.1427	77	24.1568	77
24.1772	75	24.1631	70	24.1772	81
24.1976	61	24.1835	97	24.1976	76
24.218	70	24.204	70	24.218	80
24.2384	69	24.2244	79	24.2384	89
24.2588	81	24.2448	89	24.2588	89
24.2792	61	24.2652	90	24.2792	76
24.2996	78	24.2856	88	24.2996	88
24.32	77	24.306	63	24.32	87
24.3404	93	24.3264	75	24.3404	61
24.3608	76	24.3468	82	24.3608	90
24.3812	78	24.3672	74	24.3812	74
24.4016	76	24.3876	72	24.4016	70
24.422	71	24.408	76	24.422	69
24.4424	85	24.4284	97	24.4424	70
24.4628	79	24.4489	82	24.4628	67
24.4832	69	24.4693	74	24.4832	76
24.5036	74	24.4897	73	24.5036	82
24.524	65	24.5101	86	24.524	95
24.5444	68	24.5305	69	24.5444	92
24.5648	70	24.5509	83	24.5648	86
24.5852	76	24.5713	72	24.5852	75
24.6056	69	24.5917	83	24.6056	66
24.626	68	24.6121	69	24.626	80
24.6464	69	24.6325	76	24.6464	73
24.6668	61	24.6529	77	24.6668	81
24.6872	71	24.6733	73	24.6872	70
24.7076	67	24.6937	72	24.7076	90
24.728	60	24.7142	82	24.728	66
24.7484	75	24.7346	85	24.7484	77
24.7688	62	24.755	77	24.7688	65
24.7892	67	24.7754	88	24.7892	60
24.8096	77	24.7958	90	24.8096	76
24.83	68	24.8162	76	24.83	82
24.8504	69	24.8366	85	24.8504	82
24.8708	79	24.857	76	24.8708	77
24.8912	74	24.8774	93	24.8912	76
24.9116	68	24.8978	89	24.9116	75
24.932	62	24.9182	91	24.932	76
24.9524	64	24.9386	83	24.9524	79
24.9728	78	24.9591	76	24.9728	85
24.9932	61	24.9795	69	24.9932	76
25.0136	87	24.9999	81	25.0136	72
25.034	66	25.0203	74	25.034	59
25.0544	68	25.0407	69	25.0544	70
25.0748	79	25.0611	75	25.0748	86
25.0952	59	25.0815	87	25.0952	68
25.1156	72	25.1019	87	25.1156	65
25.136	84	25.1223	72	25.136	72
25.1564	63	25.1427	72	25.1564	69
25.1768	64	25.1631	79	25.1768	88
25.1972	71	25.1835	73	25.1972	67
25.2176	66	25.2039	73	25.2176	67
25.238	61	25.2244	63	25.238	74
25.2584	52	25.2448	78	25.2584	72
25.2788	73	25.2652	69	25.2788	88
25.2992	81	25.2856	74	25.2992	70
25.3196	72	25.306	78	25.3196	67
25.34	67	25.3264	69	25.34	71
25.3604	64	25.3468	71	25.3604	62
25.3808	78	25.3672	80	25.3808	72
25.4012	75	25.3876	63	25.4012	64
25.4216	71	25.408	63	25.4216	81
25.442	92	25.4284	80	25.442	75
25.4624	70	25.4488	76	25.4624	75
25.4828	64	25.4692	73	25.4828	82
25.5032	76	25.4897	70	25.5032	78
25.5236	73	25.5101	71	25.5236	81
25.544	70	25.5305	63	25.544	77
25.5644	78	25.5509	80	25.5644	77
25.5849	72	25.5713	68	25.5849	70
25.6053	68	25.5917	58	25.6053	79
25.6257	68	25.6121	69	25.6257	89
25.6461	73	25.6325	76	25.6461	67
25.6665	74	25.6529	80	25.6665	79
25.6869	72	25.6733	77	25.6869	76
25.7073	84	25.6937	78	25.7073	72
25.7277	83	25.7141	65	25.7277	78
25.7481	59	25.7346	66	25.7481	69
25.7685	69	25.755	82	25.7685	78
25.7889	74	25.7754	81	25.7889	75
25.8093	75	25.7958	89	25.8093	63
25.8297	68	25.8162	73	25.8297	66
25.8501	80	25.8366	74	25.8501	70
25.8705	56	25.857	68	25.8705	74
25.8909	67	25.8774	67	25.8909	78
25.9113	75	25.8978	75	25.9113	81
25.9317	96	25.9182	62	25.9317	70
25.9521	60	25.9386	88	25.9521	78
25.9725	77	25.959	73	25.9725	61
25.9929	72	25.9794	74	25.9929	78
26.0133	94	25.9999	64	26.0133	71
26.0337	76	26.0203	70	26.0337	76
26.0541	70	26.0407	71	26.0541	53
26.0745	74	26.0611	76	26.0745	69
26.0949	70	26.0815	61	26.0949	62
26.1153	66	26.1019	73	26.1153	73
26.1357	72	26.1223	81	26.1357	67
26.1561	60	26.1427	56	26.1561	69
26.1765	76	26.1631	68	26.1765	48
26.1969	83	26.1835	61	26.1969	70
26.2173	76	26.2039	54	26.2173	73
26.2377	84	26.2243	76	26.2377	79
26.2581	68	26.2448	56	26.2581	89
26.2785	65	26.2652	74	26.2785	81
26.2989	68	26.2856	56	26.2989	71
26.3193	76	26.306	76	26.3193	62
26.3397	58	26.3264	61	26.3397	63
26.3601	68	26.3468	61	26.3601	67
26.3805	70	26.3672	64	26.3805	78
26.4009	62	26.3876	70	26.4009	59
26.4213	58	26.408	62	26.4213	70
26.4417	75	26.4284	62	26.4417	68
26.4621	69	26.4488	68	26.4621	70
26.4825	69	26.4692	78	26.4825	75
26.5029	89	26.4896	63	26.5029	72
26.5233	66	26.5101	69	26.5233	76
26.5437	85	26.5305	67	26.5437	61
26.5641	63	26.5509	64	26.5641	48
26.5845	61	26.5713	65	26.5845	71
26.6049	67	26.5917	57	26.6049	62
26.6253	64	26.6121	77	26.6253	72
26.6457	58	26.6325	59	26.6457	56
26.6661	60	26.6529	64	26.6661	52
26.6865	71	26.6733	53	26.6865	53
26.7069	82	26.6937	70	26.7069	67
26.7273	68	26.7141	66	26.7273	61
26.7477	63	26.7345	57	26.7477	69
26.7681	71	26.7549	56	26.7681	64
26.7885	65	26.7754	56	26.7885	62
26.8089	64	26.7958	62	26.8089	60
26.8293	80	26.8162	78	26.8293	79
26.8497	63	26.8366	64	26.8497	72
26.8701	84	26.857	56	26.8701	70
26.8905	70	26.8774	63	26.8905	56
26.9109	77	26.8978	53	26.9109	70
26.9313	63	26.9182	63	26.9313	64
26.9517	74	26.9386	59	26.9517	51
26.9721	68	26.959	62	26.9721	64
26.9925	62	26.9794	63	26.9925	53
27.0129	91	26.9998	65	27.0129	85
27.0333	61	27.0203	84	27.0333	67
27.0537	72	27.0407	83	27.0537	74
27.0741	67	27.0611	67	27.0741	78
27.0945	72	27.0815	62	27.0945	70
27.1149	73	27.1019	49	27.1149	67
27.1353	65	27.1223	66	27.1353	64
27.1557	74	27.1427	63	27.1557	68
27.1761	54	27.1631	54	27.1761	67
27.1965	69	27.1835	63	27.1965	62
27.217	49	27.2039	54	27.217	85
27.2374	54	27.2243	65	27.2374	70
27.2578	64	27.2447	49	27.2578	76
27.2782	64	27.2651	65	27.2782	77
27.2986	64	27.2856	77	27.2986	52
27.319	66	27.306	58	27.319	68
27.3394	77	27.3264	67	27.3394	90
27.3598	72	27.3468	52	27.3598	71
27.3802	71	27.3672	67	27.3802	68
27.4006	63	27.3876	53	27.4006	83
27.421	56	27.408	63	27.421	60
27.4414	58	27.4284	56	27.4414	54
27.4618	69	27.4488	71	27.4618	65
27.4822	63	27.4692	63	27.4822	62
27.5026	61	27.4896	60	27.5026	64
27.523	60	27.51	61	27.523	54
27.5434	56	27.5304	47	27.5434	76
27.5638	84	27.5509	70	27.5638	62
27.5842	74	27.5713	56	27.5842	58
27.6046	56	27.5917	58	27.6046	65
27.625	57	27.6121	64	27.625	63
27.6454	69	27.6325	61	27.6454	65
27.6658	66	27.6529	55	27.6658	67
27.6862	62	27.6733	53	27.6862	59
27.7066	59	27.6937	71	27.7066	56
27.727	73	27.7141	48	27.727	70
27.7474	54	27.7345	66	27.7474	71
27.7678	64	27.7549	70	27.7678	62
27.7882	68	27.7753	70	27.7882	84
27.8086	74	27.7958	67	27.8086	80
27.829	48	27.8162	64	27.829	70
27.8494	61	27.8366	76	27.8494	64
27.8698	65	27.857	54	27.8698	61
27.8902	70	27.8774	55	27.8902	83
27.9106	58	27.8978	46	27.9106	69
27.931	74	27.9182	54	27.931	67
27.9514	62	27.9386	66	27.9514	61
27.9718	78	27.959	67	27.9718	73
27.9922	65	27.9794	55	27.9922	78
28.0126	64	27.9998	61	28.0126	60
28.033	51	28.0202	53	28.033	80
28.0534	72	28.0406	69	28.0534	67
28.0738	77	28.0611	58	28.0738	75
28.0942	61	28.0815	63	28.0942	62
28.1146	68	28.1019	62	28.1146	63
28.135	81	28.1223	65	28.135	60
28.1554	72	28.1427	67	28.1554	71
28.1758	63	28.1631	63	28.1758	92
28.1962	54	28.1835	50	28.1962	73
28.2166	66	28.2039	67	28.2166	70
28.237	80	28.2243	73	28.237	69
28.2574	69	28.2447	48	28.2574	57
28.2778	57	28.2651	63	28.2778	59
28.2982	61	28.2855	47	28.2982	63
28.3186	63	28.306	52	28.3186	63
28.339	64	28.3264	71	28.339	79
28.3594	70	28.3468	46	28.3594	61
28.3798	64	28.3672	53	28.3798	57
28.4002	62	28.3876	54	28.4002	81
28.4206	81	28.408	63	28.4206	68
28.441	66	28.4284	61	28.441	60
28.4614	60	28.4488	60	28.4614	67
28.4818	71	28.4692	54	28.4818	66
28.5022	82	28.4896	54	28.5022	75
28.5226	55	28.51	53	28.5226	67
28.543	58	28.5304	54	28.543	60
28.5634	56	28.5508	53	28.5634	51
28.5838	67	28.5713	63	28.5838	55
28.6042	62	28.5917	61	28.6042	65
28.6246	55	28.6121	54	28.6246	69
28.645	62	28.6325	61	28.645	67
28.6654	80	28.6529	54	28.6654	72
28.6858	55	28.6733	58	28.6858	69
28.7062	79	28.6937	47	28.7062	58
28.7266	60	28.7141	63	28.7266	65
28.747	66	28.7345	68	28.747	75
28.7674	64	28.7549	55	28.7674	80
28.7878	69	28.7753	52	28.7878	49
28.8082	63	28.7957	74	28.8082	64
28.8286	70	28.8161	56	28.8286	55
28.849	69	28.8366	75	28.849	67
28.8695	63	28.857	44	28.8695	61
28.8899	71	28.8774	64	28.8899	74
28.9103	62	28.8978	47	28.9103	63
28.9307	67	28.9182	61	28.9307	75
28.9511	85	28.9386	71	28.9511	73
28.9715	65	28.959	54	28.9715	64
28.9919	79	28.9794	50	28.9919	63
29.0123	62	28.9998	57	29.0123	68
29.0327	63	29.0202	77	29.0327	68
29.0531	74	29.0406	48	29.0531	64
29.0735	78	29.061	60	29.0735	63
29.0939	65	29.0815	51	29.0939	72
29.1143	49	29.1019	40	29.1143	58
29.1347	71	29.1223	60	29.1347	75
29.1551	58	29.1427	63	29.1551	65
29.1755	64	29.1631	58	29.1755	61
29.1959	61	29.1835	67	29.1959	63
29.2163	68	29.2039	48	29.2163	62
29.2367	60	29.2243	56	29.2367	68
29.2571	65	29.2447	49	29.2571	56
29.2775	71	29.2651	70	29.2775	83
29.2979	61	29.2855	58	29.2979	68
29.3183	64	29.3059	57	29.3183	57
29.3387	60	29.3263	69	29.3387	66
29.3591	58	29.3468	60	29.3591	73
29.3795	73	29.3672	55	29.3795	74
29.3999	65	29.3876	62	29.3999	62
29.4203	69	29.408	60	29.4203	58
29.4407	49	29.4284	68	29.4407	63
29.4611	62	29.4488	54	29.4611	67
29.4815	76	29.4692	64	29.4815	70
29.5019	76	29.4896	68	29.5019	67
29.5223	64	29.51	42	29.5223	55
29.5427	68	29.5304	56	29.5427	74
29.5631	52	29.5508	47	29.5631	63
29.5835	64	29.5712	55	29.5835	56
29.6039	74	29.5916	52	29.6039	67
29.6243	75	29.6121	69	29.6243	77
29.6447	56	29.6325	54	29.6447	68
29.6651	63	29.6529	54	29.6651	71
29.6855	54	29.6733	56	29.6855	65
29.7059	71	29.6937	65	29.7059	71
29.7263	59	29.7141	58	29.7263	49
29.7467	86	29.7345	53	29.7467	70
29.7671	63	29.7549	49	29.7671	60
29.7875	73	29.7753	69	29.7875	63
29.8079	56	29.7957	50	29.8079	55
29.8283	57	29.8161	66	29.8283	61
29.8487	63	29.8365	57	29.8487	63
29.8691	64	29.857	54	29.8691	77
29.8895	53	29.8774	49	29.8895	51
29.9099	56	29.8978	40	29.9099	74
29.9303	57	29.9182	69	29.9303	46
29.9507	56	29.9386	59	29.9507	51
29.9711	55	29.959	60	29.9711	56
29.9915	70	29.9794	43	29.9915	69
30.0119	85	29.9998	53	30.0119	51
30.0323	63	30.0202	56	30.0323	62
30.0527	73	30.0406	50	30.0527	48
30.0731	58	30.061	82	30.0731	68
30.0935	60	30.0814	39	30.0935	71
30.1139	58	30.1018	53	30.1139	83
30.1343	72	30.1223	58	30.1343	68
30.1547	70	30.1427	50	30.1547	75
30.1751	47	30.1631	53	30.1751	62
30.1955	61	30.1835	56	30.1955	64
30.2159	70	30.2039	64	30.2159	61
30.2363	73	30.2243	53	30.2363	53
30.2567	47	30.2447	48	30.2567	80
30.2771	70	30.2651	54	30.2771	80
30.2975	61	30.2855	49	30.2975	76
30.3179	47	30.3059	52	30.3179	66
30.3383	68	30.3263	52	30.3383	65
30.3587	64	30.3467	54	30.3587	53
30.3791	66	30.3672	63	30.3791	70
30.3995	67	30.3876	58	30.3995	67
30.4199	74	30.408	57	30.4199	67
30.4403	47	30.4284	51	30.4403	60
30.4607	69	30.4488	49	30.4607	63
30.4811	69	30.4692	55	30.4811	49
30.5016	67	30.4896	49	30.5016	59
30.522	49	30.51	62	30.522	66
30.5424	55	30.5304	51	30.5424	65
30.5628	64	30.5508	44	30.5628	62
30.5832	70	30.5712	44	30.5832	53
30.6036	66	30.5916	52	30.6036	59
30.624	67	30.612	44	30.624	65
30.6444	61	30.6325	58	30.6444	52
30.6648	58	30.6529	53	30.6648	67
30.6852	62	30.6733	47	30.6852	63
30.7056	56	30.6937	59	30.7056	54
30.726	60	30.7141	62	30.726	59
30.7464	61	30.7345	49	30.7464	60
30.7668	70	30.7549	44	30.7668	53
30.7872	63	30.7753	51	30.7872	67
30.8076	58	30.7957	59	30.8076	61
30.828	44	30.8161	47	30.828	71
30.8484	77	30.8365	49	30.8484	53
30.8688	70	30.8569	50	30.8688	65
30.8892	55	30.8773	51	30.8892	60
30.9096	73	30.8978	51	30.9096	64
30.93	61	30.9182	52	30.93	75
30.9504	60	30.9386	56	30.9504	54
30.9708	75	30.959	48	30.9708	58
30.9912	70	30.9794	57	30.9912	65
31.0116	78	30.9998	56	31.0116	69
31.032	70	31.0202	60	31.032	55
31.0524	78	31.0406	59	31.0524	59
31.0728	69	31.061	52	31.0728	60
31.0932	70	31.0814	56	31.0932	69
31.1136	60	31.1018	53	31.1136	54
31.134	64	31.1222	51	31.134	64
31.1544	56	31.1427	52	31.1544	52
31.1748	51	31.1631	56	31.1748	58
31.1952	64	31.1835	49	31.1952	60
31.2156	60	31.2039	60	31.2156	43
31.236	70	31.2243	33	31.236	56
31.2564	63	31.2447	54	31.2564	59
31.2768	70	31.2651	56	31.2768	56
31.2972	66	31.2855	57	31.2972	64
31.3176	58	31.3059	46	31.3176	51
31.338	58	31.3263	46	31.338	51
31.3584	62	31.3467	49	31.3584	62
31.3788	66	31.3671	60	31.3788	69
31.3992	65	31.3875	54	31.3992	67
31.4196	57	31.408	54	31.4196	68
31.44	64	31.4284	54	31.44	54
31.4604	61	31.4488	45	31.4604	53
31.4808	68	31.4692	56	31.4808	61
31.5012	66	31.4896	53	31.5012	72
31.5216	63	31.51	47	31.5216	61
31.542	62	31.5304	52	31.542	67
31.5624	60	31.5508	46	31.5624	71
31.5828	60	31.5712	41	31.5828	77
31.6032	67	31.5916	60	31.6032	46
31.6236	62	31.612	39	31.6236	50
31.644	84	31.6324	54	31.644	60
31.6644	46	31.6529	65	31.6644	51
31.6848	51	31.6733	48	31.6848	47
31.7052	62	31.6937	59	31.7052	67
31.7256	57	31.7141	62	31.7256	58
31.746	73	31.7345	48	31.746	54
31.7664	72	31.7549	48	31.7664	63
31.7868	68	31.7753	57	31.7868	55
31.8072	63	31.7957	48	31.8072	70
31.8276	49	31.8161	47	31.8276	55
31.848	64	31.8365	45	31.848	51
31.8684	59	31.8569	55	31.8684	45
31.8888	57	31.8773	45	31.8888	56
31.9092	67	31.8977	57	31.9092	59
31.9296	52	31.9182	44	31.9296	68
31.95	63	31.9386	49	31.95	67
31.9704	63	31.959	54	31.9704	42
31.9908	60	31.9794	44	31.9908	51
32.0112	54	31.9998	50	32.0112	51
32.0316	59	32.0202	47	32.0316	69
32.052	51	32.0406	49	32.052	65
32.0724	71	32.061	47	32.0724	60
32.0928	59	32.0814	58	32.0928	54
32.1132	56	32.1018	59	32.1132	60
32.1336	59	32.1222	42	32.1336	50
32.1541	61	32.1426	59	32.1541	61
32.1745	53	32.163	48	32.1745	57
32.1949	67	32.1835	52	32.1949	62
32.2153	75	32.2039	47	32.2153	65
32.2357	73	32.2243	56	32.2357	57
32.2561	68	32.2447	41	32.2561	47
32.2765	61	32.2651	48	32.2765	62
32.2969	56	32.2855	54	32.2969	67
32.3173	45	32.3059	57	32.3173	52
32.3377	54	32.3263	54	32.3377	56
32.3581	51	32.3467	64	32.3581	57
32.3785	57	32.3671	53	32.3785	69
32.3989	46	32.3875	63	32.3989	55
32.4193	55	32.4079	45	32.4193	72
32.4397	52	32.4284	49	32.4397	72
32.4601	64	32.4488	56	32.4601	55
32.4805	66	32.4692	39	32.4805	44
32.5009	51	32.4896	46	32.5009	70
32.5213	52	32.51	55	32.5213	67
32.5417	53	32.5304	44	32.5417	63
32.5621	56	32.5508	56	32.5621	65
32.5825	58	32.5712	50	32.5825	69
32.6029	72	32.5916	59	32.6029	57
32.6233	79	32.612	61	32.6233	50
32.6437	59	32.6324	40	32.6437	65
32.6641	61	32.6528	50	32.6641	53
32.6845	64	32.6732	57	32.6845	54
32.7049	57	32.6937	42	32.7049	57
32.7253	61	32.7141	51	32.7253	53
32.7457	56	32.7345	47	32.7457	50
32.7661	75	32.7549	56	32.7661	47
32.7865	54	32.7753	42	32.7865	52
32.8069	73	32.7957	56	32.8069	69
32.8273	56	32.8161	57	32.8273	57
32.8477	74	32.8365	42	32.8477	69
32.8681	82	32.8569	57	32.8681	61
32.8885	57	32.8773	45	32.8885	58
32.9089	67	32.8977	48	32.9089	48
32.9293	52	32.9181	62	32.9293	54
32.9497	47	32.9385	50	32.9497	64
32.9701	58	32.959	48	32.9701	63
32.9905	69	32.9794	45	32.9905	54
33.0109	65	32.9998	60	33.0109	53
33.0313	58	33.0202	50	33.0313	52
33.0517	56	33.0406	51	33.0517	58
33.0721	65	33.061	45	33.0721	65
33.0925	53	33.0814	45	33.0925	61
33.1129	72	33.1018	53	33.1129	60
33.1333	61	33.1222	47	33.1333	51
33.1537	67	33.1426	62	33.1537	54
33.1741	55	33.163	51	33.1741	46
33.1945	56	33.1834	59	33.1945	66
33.2149	46	33.2039	49	33.2149	55
33.2353	54	33.2243	56	33.2353	52
33.2557	51	33.2447	46	33.2557	58
33.2761	59	33.2651	44	33.2761	59
33.2965	54	33.2855	49	33.2965	57
33.3169	56	33.3059	43	33.3169	46
33.3373	65	33.3263	38	33.3373	59
33.3577	54	33.3467	50	33.3577	55
33.3781	58	33.3671	65	33.3781	52
33.3985	48	33.3875	46	33.3985	64
33.4189	49	33.4079	48	33.4189	56
33.4393	52	33.4283	62	33.4393	56
33.4597	60	33.4487	56	33.4597	49
33.4801	56	33.4692	59	33.4801	45
33.5005	65	33.4896	53	33.5005	50
33.5209	55	33.51	38	33.5209	58
33.5413	49	33.5304	46	33.5413	60
33.5617	53	33.5508	49	33.5617	55
33.5821	52	33.5712	49	33.5821	59
33.6025	58	33.5916	44	33.6025	44
33.6229	45	33.612	62	33.6229	53
33.6433	63	33.6324	45	33.6433	45
33.6637	60	33.6528	49	33.6637	57
33.6841	47	33.6732	54	33.6841	60
33.7045	57	33.6936	58	33.7045	58
33.7249	48	33.7141	52	33.7249	69
33.7453	51	33.7345	42	33.7453	55
33.7657	66	33.7549	50	33.7657	58
33.7861	63	33.7753	45	33.7861	56
33.8066	58	33.7957	50	33.8066	50
33.827	49	33.8161	59	33.827	44
33.8474	50	33.8365	46	33.8474	39
33.8678	41	33.8569	48	33.8678	48
33.8882	63	33.8773	46	33.8882	59
33.9086	57	33.8977	51	33.9086	48
33.929	50	33.9181	42	33.929	48
33.9494	59	33.9385	42	33.9494	62
33.9698	53	33.9589	49	33.9698	53
33.9902	63	33.9794	36	33.9902	48
34.0106	63	33.9998	54	34.0106	50
34.031	49	34.0202	52	34.031	40
34.0514	67	34.0406	43	34.0514	54
34.0718	42	34.061	42	34.0718	62
34.0922	66	34.0814	70	34.0922	55
34.1126	62	34.1018	49	34.1126	43
34.133	55	34.1222	51	34.133	56
34.1534	52	34.1426	40	34.1534	64
34.1738	63	34.163	46	34.1738	52
34.1942	44	34.1834	44	34.1942	59
34.2146	76	34.2038	42	34.2146	53
34.235	59	34.2242	42	34.235	33
34.2554	54	34.2447	52	34.2554	43
34.2758	51	34.2651	38	34.2758	49
34.2962	47	34.2855	42	34.2962	57
34.3166	56	34.3059	42	34.3166	47
34.337	53	34.3263	42	34.337	65
34.3574	56	34.3467	40	34.3574	47
34.3778	57	34.3671	43	34.3778	70
34.3982	58	34.3875	43	34.3982	52
34.4186	61	34.4079	45	34.4186	70
34.439	63	34.4283	47	34.439	59
34.4594	69	34.4487	52	34.4594	59
34.4798	51	34.4691	37	34.4798	47
34.5002	57	34.4896	42	34.5002	56
34.5206	40	34.51	45	34.5206	56
34.541	69	34.5304	51	34.541	48
34.5614	57	34.5508	44	34.5614	54
34.5818	46	34.5712	35	34.5818	48
34.6022	56	34.5916	52	34.6022	55
34.6226	57	34.612	40	34.6226	42
34.643	50	34.6324	47	34.643	61
34.6634	49	34.6528	52	34.6634	65
34.6838	47	34.6732	53	34.6838	52
34.7042	55	34.6936	55	34.7042	44
34.7246	48	34.714	57	34.7246	48
34.745	56	34.7344	44	34.745	50
34.7654	58	34.7549	48	34.7654	51
34.7858	55	34.7753	51	34.7858	49
34.8062	60	34.7957	50	34.8062	58
34.8266	49	34.8161	39	34.8266	44
34.847	55	34.8365	37	34.847	55
34.8674	53	34.8569	46	34.8674	54
34.8878	40	34.8773	55	34.8878	53
34.9082	58	34.8977	55	34.9082	50
34.9286	60	34.9181	53	34.9286	55
34.949	49	34.9385	42	34.949	50
34.9694	62	34.9589	51	34.9694	53
34.9898	76	34.9793	62	34.9898	37
35.0102	53	34.9998	50	35.0102	37
35.0306	53	35.0202	44	35.0306	65
35.051	58	35.0406	47	35.051	55
35.0714	54	35.061	44	35.0714	49
35.0918	59	35.0814	44	35.0918	52
35.1122	54	35.1018	41	35.1122	53
35.1326	48	35.1222	44	35.1326	52
35.153	48	35.1426	48	35.153	48
35.1734	46	35.163	45	35.1734	52
35.1938	56	35.1834	46	35.1938	46
35.2142	41	35.2038	58	35.2142	50
35.2346	39	35.2242	46	35.2346	55
35.255	66	35.2446	44	35.255	57
35.2754	53	35.2651	36	35.2754	62
35.2958	57	35.2855	52	35.2958	42
35.3162	54	35.3059	37	35.3162	57
35.3366	49	35.3263	44	35.3366	46
35.357	49	35.3467	50	35.357	45
35.3774	58	35.3671	45	35.3774	39
35.3978	49	35.3875	40	35.3978	45
35.4182	50	35.4079	59	35.4182	59
35.4387	56	35.4283	51	35.4387	55
35.4591	47	35.4487	51	35.4591	62
35.4795	62	35.4691	44	35.4795	50
35.4999	64	35.4895	40	35.4999	50
35.5203	54	35.5099	36	35.5203	51
35.5407	65	35.5304	37	35.5407	54
35.5611	52	35.5508	45	35.5611	42
35.5815	60	35.5712	48	35.5815	57
35.6019	40	35.5916	51	35.6019	46
35.6223	61	35.612	48	35.6223	59
35.6427	60	35.6324	47	35.6427	55
35.6631	59	35.6528	42	35.6631	43
35.6835	61	35.6732	38	35.6835	57
35.7039	53	35.6936	46	35.7039	54
35.7243	45	35.714	41	35.7243	43
35.7447	55	35.7344	52	35.7447	42
35.7651	53	35.7548	47	35.7651	43
35.7855	41	35.7753	40	35.7855	52
35.8059	52	35.7957	45	35.8059	55
35.8263	59	35.8161	39	35.8263	45
35.8467	56	35.8365	43	35.8467	58
35.8671	55	35.8569	39	35.8671	59
35.8875	52	35.8773	47	35.8875	62
35.9079	68	35.8977	46	35.9079	47
35.9283	55	35.9181	36	35.9283	41
35.9487	49	35.9385	36	35.9487	50
35.9691	59	35.9589	50	35.9691	58
35.9895	52	35.9793	40	35.9895	54
36.0099	49	35.9997	48	36.0099	51
36.0303	48	36.0201	47	36.0303	50
36.0507	68	36.0406	49	36.0507	52
36.0711	44	36.061	44	36.0711	36
36.0915	52	36.0814	42	36.0915	36
36.1119	50	36.1018	50	36.1119	44
36.1323	46	36.1222	57	36.1323	49
36.1527	37	36.1426	36	36.1527	55
36.1731	61	36.163	60	36.1731	41
36.1935	54	36.1834	42	36.1935	37
36.2139	61	36.2038	37	36.2139	52
36.2343	35	36.2242	44	36.2343	51
36.2547	53	36.2446	45	36.2547	46
36.2751	59	36.265	46	36.2751	46
36.2955	70	36.2854	37	36.2955	52
36.3159	66	36.3059	47	36.3159	41
36.3363	54	36.3263	36	36.3363	50
36.3567	56	36.3467	48	36.3567	51
36.3771	42	36.3671	26	36.3771	51
36.3975	58	36.3875	40	36.3975	40
36.4179	54	36.4079	41	36.4179	41
36.4383	40	36.4283	42	36.4383	40
36.4587	53	36.4487	39	36.4587	38
36.4791	50	36.4691	40	36.4791	50
36.4995	58	36.4895	44	36.4995	53
36.5199	50	36.5099	38	36.5199	69
36.5403	45	36.5303	42	36.5403	54
36.5607	57	36.5508	33	36.5607	48
36.5811	41	36.5712	39	36.5811	54
36.6015	58	36.5916	44	36.6015	52
36.6219	46	36.612	38	36.6219	40
36.6423	44	36.6324	38	36.6423	47
36.6627	43	36.6528	55	36.6627	46
36.6831	51	36.6732	55	36.6831	53
36.7035	63	36.6936	44	36.7035	54
36.7239	53	36.714	48	36.7239	55
36.7443	50	36.7344	42	36.7443	49
36.7647	43	36.7548	41	36.7647	51
36.7851	50	36.7752	41	36.7851	51
36.8055	54	36.7956	32	36.8055	46
36.8259	53	36.8161	42	36.8259	47
36.8463	58	36.8365	38	36.8463	55
36.8667	48	36.8569	40	36.8667	57
36.8871	43	36.8773	46	36.8871	47
36.9075	65	36.8977	43	36.9075	45
36.9279	46	36.9181	48	36.9279	47
36.9483	63	36.9385	40	36.9483	45
36.9687	51	36.9589	31	36.9687	37
36.9891	47	36.9793	46	36.9891	35
37.0095	43	36.9997	39	37.0095	44
37.0299	50	37.0201	48	37.0299	43
37.0503	51	37.0405	45	37.0503	38
37.0707	49	37.061	40	37.0707	57
37.0912	51	37.0814	45	37.0912	59
37.1116	41	37.1018	29	37.1116	37
37.132	67	37.1222	44	37.132	47
37.1524	53	37.1426	43	37.1524	57
37.1728	52	37.163	51	37.1728	42
37.1932	41	37.1834	41	37.1932	50
37.2136	57	37.2038	45	37.2136	43
37.234	42	37.2242	37	37.234	50
37.2544	45	37.2446	37	37.2544	51
37.2748	63	37.265	47	37.2748	54
37.2952	49	37.2854	40	37.2952	59
37.3156	46	37.3058	37	37.3156	47
37.336	56	37.3263	32	37.336	54
37.3564	54	37.3467	44	37.3564	54
37.3768	62	37.3671	49	37.3768	38
37.3972	64	37.3875	34	37.3972	36
37.4176	46	37.4079	24	37.4176	47
37.438	56	37.4283	56	37.438	40
37.4584	45	37.4487	36	37.4584	64
37.4788	43	37.4691	52	37.4788	51
37.4992	48	37.4895	39	37.4992	49
37.5196	57	37.5099	37	37.5196	42
37.54	44	37.5303	23	37.54	45
37.5604	52	37.5507	38	37.5604	53
37.5808	45	37.5711	41	37.5808	48
37.6012	52	37.5916	47	37.6012	48
37.6216	39	37.612	34	37.6216	54
37.642	49	37.6324	46	37.642	43
37.6624	51	37.6528	53	37.6624	43
37.6828	56	37.6732	52	37.6828	40
37.7032	39	37.6936	43	37.7032	39
37.7236	52	37.714	40	37.7236	35
37.744	57	37.7344	48	37.744	41
37.7644	46	37.7548	39	37.7644	50
37.7848	67	37.7752	47	37.7848	48
37.8052	52	37.7956	42	37.8052	49
37.8256	51	37.816	43	37.8256	52
37.846	44	37.8365	40	37.846	40
37.8664	59	37.8569	33	37.8664	40
37.8868	49	37.8773	34	37.8868	61
37.9072	48	37.8977	39	37.9072	45
37.9276	46	37.9181	33	37.9276	44
37.948	37	37.9385	41	37.948	47
37.9684	45	37.9589	47	37.9684	39
37.9888	55	37.9793	27	37.9888	40
38.0092	46	37.9997	47	38.0092	41
38.0296	41	38.0201	34	38.0296	51
38.05	46	38.0405	39	38.05	41
38.0704	39	38.0609	51	38.0704	48
38.0908	39	38.0813	52	38.0908	53
38.1112	56	38.1018	44	38.1112	39
38.1316	61	38.1222	42	38.1316	40
38.152	53	38.1426	34	38.152	42
38.1724	51	38.163	33	38.1724	44
38.1928	50	38.1834	42	38.1928	44
38.2132	35	38.2038	25	38.2132	38
38.2336	49	38.2242	42	38.2336	49
38.254	51	38.2446	34	38.254	59
38.2744	52	38.265	52	38.2744	51
38.2948	53	38.2854	33	38.2948	61
38.3152	54	38.3058	38	38.3152	53
38.3356	52	38.3262	35	38.3356	37
38.356	51	38.3466	40	38.356	45
38.3764	48	38.3671	40	38.3764	46
38.3968	41	38.3875	40	38.3968	43
38.4172	48	38.4079	41	38.4172	31
38.4376	56	38.4283	41	38.4376	50
38.458	43	38.4487	37	38.458	33
38.4784	47	38.4691	40	38.4784	31
38.4988	43	38.4895	42	38.4988	44
38.5192	52	38.5099	44	38.5192	45
38.5396	48	38.5303	44	38.5396	36
38.56	56	38.5507	43	38.56	47
38.5804	51	38.5711	43	38.5804	38
38.6008	54	38.5915	29	38.6008	41
38.6212	42	38.612	41	38.6212	47
38.6416	44	38.6324	43	38.6416	41
38.662	31	38.6528	32	38.662	48
38.6824	42	38.6732	43	38.6824	42
38.7028	44	38.6936	39	38.7028	49
38.7232	42	38.714	34	38.7232	46
38.7437	60	38.7344	30	38.7437	38
38.7641	57	38.7548	36	38.7641	59
38.7845	42	38.7752	36	38.7845	35
38.8049	56	38.7956	38	38.8049	51
38.8253	43	38.816	43	38.8253	42
38.8457	41	38.8364	26	38.8457	36
38.8661	42	38.8568	39	38.8661	44
38.8865	53	38.8773	39	38.8865	41
38.9069	40	38.8977	40	38.9069	44
38.9273	51	38.9181	42	38.9273	39
38.9477	46	38.9385	38	38.9477	39
38.9681	43	38.9589	52	38.9681	47
38.9885	40	38.9793	43	38.9885	44
39.0089	58	38.9997	39	39.0089	44
39.0293	42	39.0201	41	39.0293	39
39.0497	64	39.0405	45	39.0497	48
39.0701	46	39.0609	34	39.0701	52
39.0905	34	39.0813	55	39.0905	39
39.1109	55	39.1017	38	39.1109	48
39.1313	51	39.1222	41	39.1313	45
39.1517	43	39.1426	37	39.1517	40
39.1721	46	39.163	53	39.1721	46
39.1925	54	39.1834	36	39.1925	35
39.2129	32	39.2038	44	39.2129	37
39.2333	52	39.2242	37	39.2333	52
39.2537	45	39.2446	42	39.2537	54
39.2741	53	39.265	41	39.2741	41
39.2945	53	39.2854	41	39.2945	49
39.3149	43	39.3058	38	39.3149	39
39.3353	49	39.3262	41	39.3353	51
39.3557	50	39.3466	37	39.3557	43
39.3761	57	39.367	28	39.3761	54
39.3965	47	39.3875	47	39.3965	51
39.4169	53	39.4079	30	39.4169	51
39.4373	52	39.4283	39	39.4373	50
39.4577	52	39.4487	36	39.4577	36
39.4781	65	39.4691	43	39.4781	31
39.4985	61	39.4895	34	39.4985	42
39.5189	46	39.5099	44	39.5189	36
39.5393	59	39.5303	28	39.5393	44
39.5597	49	39.5507	43	39.5597	52
39.5801	51	39.5711	40	39.5801	49
39.6005	50	39.5915	41	39.6005	48
39.6209	62	39.6119	39	39.6209	42
39.6413	50	39.6323	38	39.6413	46
39.6617	53	39.6528	35	39.6617	37
39.6821	29	39.6732	35	39.6821	47
39.7025	50	39.6936	44	39.7025	60
39.7229	40	39.714	51	39.7229	46
39.7433	52	39.7344	27	39.7433	36
39.7637	46	39.7548	35	39.7637	54
39.7841	40	39.7752	34	39.7841	49
39.8045	52	39.7956	50	39.8045	48
39.8249	45	39.816	36	39.8249	41
39.8453	41	39.8364	49	39.8453	42
39.8657	49	39.8568	42	39.8657	47
39.8861	50	39.8772	43	39.8861	40
39.9065	62	39.8977	41	39.9065	37
39.9269	49	39.9181	45	39.9269	48
39.9473	44	39.9385	39	39.9473	43
39.9677	46	39.9589	28	39.9677	38
39.9881	67	39.9793	38	39.9881	49
40.0085	61	39.9997	31	40.0085	38
40.0289	46	40.0201	33	40.0289	50
40.0493	46	40.0405	54	40.0493	46
40.0697	54	40.0609	38	40.0697	37
40.0901	50	40.0813	37	40.0901	40
40.1105	47	40.1017	54	40.1105	40
40.1309	40	40.1221	44	40.1309	42
40.1513	54	40.1425	34	40.1513	46
40.1717	42	40.163	43	40.1717	52
40.1921	51	40.1834	52	40.1921	55
40.2125	43	40.2038	39	40.2125	41
40.2329	49	40.2242	44	40.2329	36
40.2533	47	40.2446	25	40.2533	40
40.2737	48	40.265	40	40.2737	45
40.2941	45	40.2854	40	40.2941	45
40.3145	46	40.3058	42	40.3145	55
40.3349	40	40.3262	46	40.3349	49
40.3553	49	40.3466	43	40.3553	40
40.3758	40	40.367	41	40.3758	45
40.3962	40	40.3874	37	40.3962	51
40.4166	45	40.4079	30	40.4166	47
40.437	38	40.4283	38	40.437	53
40.4574	46	40.4487	30	40.4574	35
40.4778	45	40.4691	37	40.4778	54
40.4982	39	40.4895	40	40.4982	41
40.5186	56	40.5099	48	40.5186	29
40.539	52	40.5303	35	40.539	46
40.5594	55	40.5507	31	40.5594	40
40.5798	47	40.5711	35	40.5798	44
40.6002	53	40.5915	39	40.6002	42
40.6206	44	40.6119	38	40.6206	31
40.641	45	40.6323	40	40.641	42
40.6614	52	40.6527	41	40.6614	44
40.6818	49	40.6732	40	40.6818	51
40.7022	37	40.6936	30	40.7022	44
40.7226	40	40.714	36	40.7226	47
40.743	57	40.7344	44	40.743	48
40.7634	50	40.7548	53	40.7634	41
40.7838	42	40.7752	44	40.7838	48
40.8042	58	40.7956	37	40.8042	44
40.8246	44	40.816	47	40.8246	42
40.845	45	40.8364	38	40.845	50
40.8654	45	40.8568	37	40.8654	57
40.8858	49	40.8772	31	40.8858	47
40.9062	43	40.8976	39	40.9062	44
40.9266	44	40.918	30	40.9266	42
40.947	42	40.9385	39	40.947	52
40.9674	42	40.9589	37	40.9674	40
40.9878	40	40.9793	27	40.9878	44
41.0082	47	40.9997	32	41.0082	52
41.0286	46	41.0201	41	41.0286	46
41.049	36	41.0405	33	41.049	32
41.0694	44	41.0609	28	41.0694	47
41.0898	42	41.0813	41	41.0898	38
41.1102	49	41.1017	43	41.1102	34
41.1306	48	41.1221	39	41.1306	58
41.151	46	41.1425	39	41.151	49
41.1714	46	41.1629	38	41.1714	46
41.1918	51	41.1834	35	41.1918	53
41.2122	48	41.2038	42	41.2122	44
41.2326	52	41.2242	48	41.2326	43
41.253	38	41.2446	33	41.253	30
41.2734	51	41.265	45	41.2734	44
41.2938	39	41.2854	32	41.2938	57
41.3142	51	41.3058	50	41.3142	51
41.3346	39	41.3262	42	41.3346	30
41.355	46	41.3466	34	41.355	44
41.3754	49	41.367	36	41.3754	36
41.3958	43	41.3874	21	41.3958	38
41.4162	37	41.4078	37	41.4162	45
41.4366	47	41.4282	39	41.4366	42
41.457	46	41.4487	38	41.457	44
41.4774	65	41.4691	38	41.4774	42
41.4978	41	41.4895	34	41.4978	47
41.5182	42	41.5099	40	41.5182	33
41.5386	39	41.5303	28	41.5386	45
41.559	39	41.5507	51	41.559	48
41.5794	54	41.5711	41	41.5794	45
41.5998	54	41.5915	34	41.5998	47
41.6202	58	41.6119	34	41.6202	53
41.6406	50	41.6323	40	41.6406	42
41.661	49	41.6527	50	41.661	35
41.6814	48	41.6731	29	41.6814	40
41.7018	50	41.6935	41	41.7018	46
41.7222	39	41.714	36	41.7222	40
41.7426	51	41.7344	41	41.7426	41
41.763	47	41.7548	36	41.763	49
41.7834	52	41.7752	52	41.7834	42
41.8038	48	41.7956	44	41.8038	46
41.8242	34	41.816	46	41.8242	44
41.8446	51	41.8364	50	41.8446	46
41.865	47	41.8568	37	41.865	49
41.8854	45	41.8772	32	41.8854	51
41.9058	45	41.8976	37	41.9058	57
41.9262	64	41.918	38	41.9262	43
41.9466	49	41.9384	33	41.9466	43
41.967	43	41.9589	31	41.967	32
41.9874	59	41.9793	31	41.9874	46
42.0078	48	41.9997	38	42.0078	52
42.0283	55	42.0201	34	42.0283	40
42.0487	44	42.0405	37	42.0487	42
42.0691	51	42.0609	46	42.0691	54
42.0895	40	42.0813	26	42.0895	48
42.1099	55	42.1017	33	42.1099	36
42.1303	51	42.1221	50	42.1303	47
42.1507	54	42.1425	45	42.1507	47
42.1711	50	42.1629	54	42.1711	39
42.1915	42	42.1833	47	42.1915	45
42.2119	39	42.2037	40	42.2119	61
42.2323	55	42.2242	42	42.2323	44
42.2527	37	42.2446	39	42.2527	63
42.2731	59	42.265	40	42.2731	31
42.2935	49	42.2854	48	42.2935	51
42.3139	50	42.3058	41	42.3139	47
42.3343	44	42.3262	39	42.3343	44
42.3547	37	42.3466	33	42.3547	47
42.3751	37	42.367	49	42.3751	52
42.3955	47	42.3874	53	42.3955	63
42.4159	48	42.4078	37	42.4159	44
42.4363	52	42.4282	39	42.4363	37
42.4567	39	42.4486	41	42.4567	44
42.4771	41	42.4691	37	42.4771	52
42.4975	46	42.4895	38	42.4975	44
42.5179	40	42.5099	36	42.5179	43
42.5383	53	42.5303	39	42.5383	30
42.5587	37	42.5507	35	42.5587	44
42.5791	59	42.5711	33	42.5791	38
42.5995	41	42.5915	42	42.5995	34
42.6199	50	42.6119	36	42.6199	43
42.6403	46	42.6323	33	42.6403	44
42.6607	40	42.6527	37	42.6607	51
42.6811	38	42.6731	37	42.6811	49
42.7015	39	42.6935	38	42.7015	45
42.7219	42	42.7139	31	42.7219	46
42.7423	47	42.7344	28	42.7423	53
42.7627	38	42.7548	47	42.7627	40
42.7831	58	42.7752	35	42.7831	38
42.8035	49	42.7956	34	42.8035	43
42.8239	62	42.816	38	42.8239	40
42.8443	42	42.8364	37	42.8443	47
42.8647	50	42.8568	37	42.8647	40
42.8851	46	42.8772	45	42.8851	40
42.9055	45	42.8976	27	42.9055	51
42.9259	50	42.918	45	42.9259	45
42.9463	46	42.9384	51	42.9463	46
42.9667	40	42.9588	50	42.9667	36
42.9871	51	42.9792	37	42.9871	34
43.0075	61	42.9997	38	43.0075	33
43.0279	48	43.0201	35	43.0279	46
43.0483	42	43.0405	40	43.0483	41
43.0687	41	43.0609	55	43.0687	50
43.0891	48	43.0813	36	43.0891	42
43.1095	48	43.1017	37	43.1095	47
43.1299	49	43.1221	29	43.1299	41
43.1503	42	43.1425	41	43.1503	36
43.1707	51	43.1629	42	43.1707	53
43.1911	56	43.1833	37	43.1911	34
43.2115	54	43.2037	29	43.2115	40
43.2319	45	43.2241	45	43.2319	40
43.2523	42	43.2446	39	43.2523	51
43.2727	46	43.265	31	43.2727	33
43.2931	47	43.2854	46	43.2931	32
43.3135	36	43.3058	27	43.3135	35
43.3339	51	43.3262	34	43.3339	39
43.3543	34	43.3466	35	43.3543	36
43.3747	38	43.367	42	43.3747	33
43.3951	58	43.3874	37	43.3951	38
43.4155	48	43.4078	43	43.4155	39
43.4359	34	43.4282	37	43.4359	35
43.4563	53	43.4486	40	43.4563	50
43.4767	57	43.469	46	43.4767	55
43.4971	56	43.4894	39	43.4971	47
43.5175	36	43.5099	45	43.5175	51
43.5379	43	43.5303	38	43.5379	34
43.5583	51	43.5507	35	43.5583	38
43.5787	44	43.5711	32	43.5787	40
43.5991	51	43.5915	39	43.5991	47
43.6195	52	43.6119	40	43.6195	42
43.6399	35	43.6323	34	43.6399	44
43.6603	37	43.6527	44	43.6603	41
43.6808	50	43.6731	51	43.6808	42
43.7012	47	43.6935	54	43.7012	40
43.7216	38	43.7139	45	43.7216	34
43.742	43	43.7343	30	43.742	41
43.7624	40	43.7547	35	43.7624	31
43.7828	58	43.7752	46	43.7828	42
43.8032	32	43.7956	42	43.8032	31
43.8236	63	43.816	40	43.8236	42
43.844	54	43.8364	31	43.844	43
43.8644	37	43.8568	33	43.8644	40
43.8848	52	43.8772	41	43.8848	49
43.9052	36	43.8976	34	43.9052	29
43.9256	50	43.918	32	43.9256	38
43.946	46	43.9384	39	43.946	45
43.9664	48	43.9588	32	43.9664	36
43.9868	46	43.9792	43	43.9868	37
44.0072	40	43.9996	28	44.0072	40
44.0276	29	44.0201	38	44.0276	45
44.048	44	44.0405	24	44.048	45
44.0684	46	44.0609	43	44.0684	35
44.0888	48	44.0813	35	44.0888	43
44.1092	42	44.1017	43	44.1092	40
44.1296	41	44.1221	32	44.1296	41
44.15	37	44.1425	27	44.15	48
44.1704	33	44.1629	38	44.1704	46
44.1908	39	44.1833	41	44.1908	65
44.2112	45	44.2037	41	44.2112	41
44.2316	40	44.2241	33	44.2316	28
44.252	31	44.2445	43	44.252	40
44.2724	50	44.2649	38	44.2724	34
44.2928	46	44.2854	38	44.2928	46
44.3132	44	44.3058	36	44.3132	44
44.3336	39	44.3262	35	44.3336	49
44.354	42	44.3466	24	44.354	30
44.3744	34	44.367	38	44.3744	41
44.3948	55	44.3874	23	44.3948	41
44.4152	42	44.4078	42	44.4152	37
44.4356	38	44.4282	39	44.4356	45
44.456	43	44.4486	41	44.456	39
44.4764	50	44.469	48	44.4764	47
44.4968	34	44.4894	28	44.4968	40
44.5172	44	44.5098	31	44.5172	27
44.5376	37	44.5303	39	44.5376	51
44.558	49	44.5507	48	44.558	39
44.5784	50	44.5711	23	44.5784	35
44.5988	40	44.5915	46	44.5988	32
44.6192	48	44.6119	35	44.6192	43
44.6396	38	44.6323	43	44.6396	40
44.66	47	44.6527	36	44.66	36
44.6804	43	44.6731	36	44.6804	31
44.7008	39	44.6935	33	44.7008	38
44.7212	48	44.7139	39	44.7212	41
44.7416	34	44.7343	29	44.7416	44
44.762	40	44.7547	28	44.762	56
44.7824	55	44.7751	32	44.7824	38
44.8028	49	44.7956	38	44.8028	40
44.8232	45	44.816	35	44.8232	39
44.8436	53	44.8364	40	44.8436	36
44.864	32	44.8568	37	44.864	40
44.8844	37	44.8772	33	44.8844	37
44.9048	45	44.8976	37	44.9048	37
44.9252	54	44.918	32	44.9252	37
44.9456	40	44.9384	41	44.9456	32
44.966	43	44.9588	37	44.966	53
44.9864	51	44.9792	40	44.9864	51
45.0068	40	44.9996	29	45.0068	57
45.0272	43	45.02	38	45.0272	40
45.0476	44	45.0404	31	45.0476	46
45.068	40	45.0609	30	45.068	37
45.0884	37	45.0813	34	45.0884	38
45.1088	39	45.1017	34	45.1088	44
45.1292	42	45.1221	40	45.1292	44
45.1496	34	45.1425	32	45.1496	47
45.17	38	45.1629	39	45.17	37
45.1904	50	45.1833	35	45.1904	33
45.2108	52	45.2037	41	45.2108	36
45.2312	42	45.2241	41	45.2312	35
45.2516	39	45.2445	29	45.2516	43
45.272	45	45.2649	26	45.272	40
45.2924	50	45.2853	39	45.2924	28
45.3129	40	45.3058	34	45.3129	39
45.3333	60	45.3262	28	45.3333	39
45.3537	34	45.3466	28	45.3537	33
45.3741	38	45.367	32	45.3741	29
45.3945	45	45.3874	39	45.3945	40
45.4149	46	45.4078	43	45.4149	41
45.4353	39	45.4282	29	45.4353	33
45.4557	43	45.4486	42	45.4557	48
45.4761	39	45.469	36	45.4761	31
45.4965	41	45.4894	36	45.4965	30
45.5169	30	45.5098	35	45.5169	36
45.5373	53	45.5302	31	45.5373	40
45.5577	51	45.5506	28	45.5577	39
45.5781	27	45.5711	33	45.5781	40
45.5985	41	45.5915	35	45.5985	41
45.6189	39	45.6119	29	45.6189	46
45.6393	34	45.6323	39	45.6393	41
45.6597	30	45.6527	52	45.6597	32
45.6801	54	45.6731	30	45.6801	43
45.7005	37	45.6935	40	45.7005	42
45.7209	49	45.7139	36	45.7209	33
45.7413	39	45.7343	35	45.7413	41
45.7617	42	45.7547	29	45.7617	42
45.7821	34	45.7751	30	45.7821	50
45.8025	40	45.7955	31	45.8025	41
45.8229	47	45.816	50	45.8229	51
45.8433	55	45.8364	33	45.8433	44
45.8637	37	45.8568	43	45.8637	47
45.8841	40	45.8772	43	45.8841	34
45.9045	46	45.8976	35	45.9045	31
45.9249	41	45.918	27	45.9249	40
45.9453	41	45.9384	40	45.9453	32
45.9657	47	45.9588	31	45.9657	40
45.9861	48	45.9792	31	45.9861	36
46.0065	47	45.9996	31	46.0065	43
46.0269	35	46.02	40	46.0269	30
46.0473	44	46.0404	44	46.0473	34
46.0677	39	46.0608	39	46.0677	42
46.0881	37	46.0813	44	46.0881	31
46.1085	40	46.1017	31	46.1085	43
46.1289	46	46.1221	42	46.1289	40
46.1493	39	46.1425	33	46.1493	34
46.1697	44	46.1629	35	46.1697	38
46.1901	38	46.1833	41	46.1901	42
46.2105	36	46.2037	29	46.2105	44
46.2309	49	46.2241	35	46.2309	38
46.2513	31	46.2445	40	46.2513	46
46.2717	37	46.2649	36	46.2717	44
46.2921	36	46.2853	39	46.2921	36
46.3125	41	46.3057	42	46.3125	33
46.3329	46	46.3261	36	46.3329	31
46.3533	35	46.3466	46	46.3533	35
46.3737	39	46.367	49	46.3737	34
46.3941	44	46.3874	40	46.3941	43
46.4145	37	46.4078	27	46.4145	34
46.4349	46	46.4282	41	46.4349	41
46.4553	48	46.4486	33	46.4553	40
46.4757	31	46.469	36	46.4757	37
46.4961	42	46.4894	35	46.4961	45
46.5165	48	46.5098	30	46.5165	31
46.5369	43	46.5302	31	46.5369	40
46.5573	36	46.5506	38	46.5573	44
46.5777	57	46.571	27	46.5777	28
46.5981	35	46.5915	34	46.5981	31
46.6185	49	46.6119	33	46.6185	32
46.6389	40	46.6323	35	46.6389	40
46.6593	44	46.6527	38	46.6593	29
46.6797	47	46.6731	29	46.6797	39
46.7001	32	46.6935	26	46.7001	42
46.7205	38	46.7139	48	46.7205	33
46.7409	43	46.7343	39	46.7409	42
46.7613	48	46.7547	36	46.7613	36
46.7817	29	46.7751	33	46.7817	38
46.8021	42	46.7955	38	46.8021	31
46.8225	55	46.8159	41	46.8225	43
46.8429	50	46.8363	32	46.8429	41
46.8633	33	46.8568	34	46.8633	42
46.8837	41	46.8772	31	46.8837	28
46.9041	43	46.8976	37	46.9041	29
46.9245	37	46.918	42	46.9245	31
46.9449	31	46.9384	29	46.9449	42
46.9654	39	46.9588	36	46.9654	31
46.9858	46	46.9792	32	46.9858	35
47.0062	42	46.9996	24	47.0062	36
47.0266	35	47.02	30	47.0266	42
47.047	50	47.0404	29	47.047	37
47.0674	42	47.0608	28	47.0674	33
47.0878	32	47.0812	35	47.0878	45
47.1082	41	47.1016	30	47.1082	42
47.1286	44	47.1221	45	47.1286	31
47.149	30	47.1425	30	47.149	32
47.1694	43	47.1629	30	47.1694	42
47.1898	40	47.1833	30	47.1898	41
47.2102	26	47.2037	35	47.2102	30
47.2306	33	47.2241	37	47.2306	56
47.251	38	47.2445	25	47.251	36
47.2714	39	47.2649	43	47.2714	36
47.2918	36	47.2853	39	47.2918	31
47.3122	36	47.3057	26	47.3122	31
47.3326	30	47.3261	25	47.3326	31
47.353	32	47.3465	38	47.353	32
47.3734	34	47.367	34	47.3734	28
47.3938	33	47.3874	31	47.3938	28
47.4142	38	47.4078	25	47.4142	41
47.4346	38	47.4282	44	47.4346	41
47.455	48	47.4486	33	47.455	27
47.4754	37	47.469	34	47.4754	28
47.4958	45	47.4894	45	47.4958	37
47.5162	39	47.5098	22	47.5162	33
47.5366	43	47.5302	45	47.5366	44
47.557	43	47.5506	28	47.557	29
47.5774	27	47.571	40	47.5774	35
47.5978	34	47.5914	40	47.5978	37
47.6182	30	47.6118	32	47.6182	43
47.6386	43	47.6323	23	47.6386	36
47.659	35	47.6527	38	47.659	47
47.6794	38	47.6731	39	47.6794	41
47.6998	52	47.6935	40	47.6998	34
47.7202	34	47.7139	35	47.7202	35
47.7406	38	47.7343	30	47.7406	40
47.761	50	47.7547	30	47.761	39
47.7814	37	47.7751	42	47.7814	41
47.8018	36	47.7955	32	47.8018	30
47.8222	28	47.8159	28	47.8222	37
47.8426	48	47.8363	23	47.8426	36
47.863	41	47.8567	23	47.863	44
47.8834	39	47.8772	41	47.8834	32
47.9038	42	47.8976	24	47.9038	29
47.9242	30	47.918	27	47.9242	32
47.9446	36	47.9384	34	47.9446	33
47.965	42	47.9588	35	47.965	35
47.9854	38	47.9792	18	47.9854	33
48.0058	30	47.9996	37	48.0058	26
48.0262	40	48.02	27	48.0262	44
48.0466	41	48.0404	40	48.0466	36
48.067	32	48.0608	45	48.067	36
48.0874	37	48.0812	29	48.0874	33
48.1078	44	48.1016	30	48.1078	40
48.1282	35	48.122	37	48.1282	48
48.1486	30	48.1425	35	48.1486	38
48.169	35	48.1629	30	48.169	44
48.1894	46	48.1833	39	48.1894	33
48.2098	37	48.2037	39	48.2098	37
48.2302	40	48.2241	27	48.2302	32
48.2506	42	48.2445	28	48.2506	30
48.271	37	48.2649	26	48.271	46
48.2914	42	48.2853	32	48.2914	38
48.3118	40	48.3057	41	48.3118	28
48.3322	32	48.3261	30	48.3322	36
48.3526	46	48.3465	28	48.3526	32
48.373	46	48.3669	26	48.373	35
48.3934	37	48.3873	28	48.3934	34
48.4138	31	48.4078	37	48.4138	42
48.4342	37	48.4282	32	48.4342	33
48.4546	35	48.4486	30	48.4546	24
48.475	40	48.469	28	48.475	43
48.4954	47	48.4894	34	48.4954	31
48.5158	38	48.5098	31	48.5158	29
48.5362	39	48.5302	28	48.5362	32
48.5566	40	48.5506	33	48.5566	38
48.577	60	48.571	35	48.577	32
48.5975	28	48.5914	34	48.5975	34
48.6179	39	48.6118	32	48.6179	36
48.6383	37	48.6322	21	48.6383	46
48.6587	28	48.6527	26	48.6587	27
48.6791	39	48.6731	33	48.6791	35
48.6995	48	48.6935	24	48.6995	41
48.7199	43	48.7139	35	48.7199	41
48.7403	32	48.7343	30	48.7403	38
48.7607	35	48.7547	34	48.7607	30
48.7811	40	48.7751	41	48.7811	36
[truncated: 60 more rows]
