# Supplementary material for: Achieving Robust Cholesteric Liquid Crystal Polymer Networks with High Luminescence Dissymmetry Factor
Source: Research Square preprint supplement (doi:10.21203/rs.3.rs-7436711/v1), 2025-09-17
Supplement: Supplementary file 11 [file b47704bd1bfff01832e2e24c.xlsx]

## Sheet: Sheet1
CPL					CD					CPL					CD
	(S-M)0.01-(FC6)0.99	(S-M)0.03-(FC6)0.97	(S-M)0.05-(FC6)0.95	(S-M)0.1-(FC6)0.9		(S-M)0.01-(FC6)0.99	(S-M)0.03-(FC6)0.97	(S-M)0.05-(FC6)0.95	(S-M)0.1-(FC6)0.9		(R-M)0.01-(FC6)0.99	(R-M)0.03-(FC6)0.97	(R-M)0.05-(FC6)0.95	(R-M)0.1-(FC6)0.9		(R-M)0.01-(FC6)0.99	(R-M)0.03-(FC6)0.97	(R-M)0.05-(FC6)0.95	(R-M)0.1-(FC6)0.9
600	14.2212	9.73779	2.78525	1.69347	600	0.00885	0.00958	0.00911	0.00882	600	-16.719	-5.27148	-1.4574	0.64168	600	0.0063	0.00656	0.00596	0.00698
599	15.208	10.2174	1.75472	1.61733	599	0.00894	0.00973	0.00926	0.00887	599.9	-16.7944	-5.09273	-1.33451	0.37935	599.9	0.0063	0.00653	0.00592	0.00699
598	16.2601	9.84271	2.73315	1.49949	598	0.00898	0.00978	0.00934	0.00894	599.8	-16.9844	-5.08901	-1.44122	0.3075	599.8	0.0063	0.00655	0.00592	0.007
597	17.8554	8.75222	3.89348	0.43897	597	0.00903	0.00989	0.00946	0.00907	599.7	-16.7608	-4.99267	-1.57668	0.29469	599.7	0.00633	0.00656	0.0059	0.007
596	17.8213	8.09233	4.77295	0.64661	596	0.00897	0.00994	0.00956	0.00916	599.6	-16.8226	-4.70398	-1.49636	0.22963	599.6	0.00636	0.00655	0.00589	0.00703
595	18.5305	8.01365	4.72699	1.37251	595	0.00907	0.00999	0.00966	0.00922	599.5	-16.8575	-5.02297	-1.22397	0.19223	599.5	0.00637	0.00652	0.00587	0.00704
594	18.1375	8.89204	4.56765	0.19222	594	0.00916	0.01003	0.00958	0.00921	599.4	-17.005	-5.38592	-1.01551	0.0979	599.4	0.00636	0.00651	0.00585	0.00707
593	18.2091	9.93045	3.82089	-0.01819	593	0.00932	0.01005	0.00962	0.00934	599.3	-16.8505	-5.28406	-0.79621	0.42782	599.3	0.00634	0.00653	0.00587	0.00709
592	17.3027	10.816	2.84588	0.11258	592	0.00937	0.01016	0.00963	0.00941	599.2	-17.122	-5.15028	-1.10264	0.40953	599.2	0.00638	0.0065	0.00586	0.0071
591	18.5543	10.5603	3.90493	-0.03564	591	0.00945	0.01024	0.00987	0.00947	599.1	-17.3032	-5.28491	-1.56004	0.42222	599.1	0.00641	0.00652	0.00589	0.00709
590	18.5415	11.0111	4.45502	0.60169	590	0.00967	0.01038	0.01001	0.00951	599	-17.0225	-5.60162	-1.59804	0.98646	599	0.00639	0.0065	0.00585	0.00709
589	20.9401	10.6307	4.80054	1.11409	589	0.00969	0.01046	0.01018	0.00957	598.9	-16.9255	-5.67919	-1.90627	0.51316	598.9	0.00638	0.00646	0.00583	0.00709
588	21.8632	10.2779	5.26051	1.54428	588	0.00974	0.01056	0.01015	0.00959	598.8	-17.1624	-5.57346	-2.05723	0.69205	598.8	0.0064	0.00647	0.00583	0.0071
587	22.8399	9.62215	4.5826	0.81767	587	0.00977	0.0105	0.01031	0.00973	598.7	-16.7306	-5.11014	-1.93934	0.71184	598.7	0.00639	0.00649	0.00587	0.00714
586	23.1074	10.0095	6.47549	0.80484	586	0.0098	0.01054	0.01038	0.00994	598.6	-16.6261	-5.08258	-1.60446	0.78885	598.6	0.00636	0.00649	0.00587	0.00716
585	25.2675	10.5378	6.40741	1.04131	585	0.00999	0.01063	0.01041	0.01008	598.5	-16.7028	-5.51714	-1.89772	1.07246	598.5	0.00632	0.0065	0.0059	0.00716
584	27.7718	11.5051	6.11271	0.6883	584	0.01006	0.01082	0.01048	0.01017	598.4	-16.5267	-5.27108	-1.7593	0.93266	598.4	0.00626	0.0065	0.00591	0.00716
583	28.8079	10.7098	6.36478	1.44355	583	0.01014	0.01093	0.01049	0.01012	598.3	-16.8843	-5.10644	-1.54062	0.8851	598.3	0.0063	0.00648	0.0059	0.00716
582	30.8798	12.7426	6.69217	0.8833	582	0.01021	0.01107	0.01064	0.01016	598.2	-17.2391	-5.32374	-1.30133	1.32601	598.2	0.0063	0.00652	0.00592	0.0072
581	30.4182	12.6861	8.80324	1.84024	581	0.01032	0.01111	0.01074	0.01027	598.1	-17.3014	-5.77527	-1.24878	1.24132	598.1	0.00632	0.00652	0.0059	0.00724
580	30.6273	13.5057	8.96628	2.49973	580	0.01045	0.01115	0.01093	0.01043	598	-17.5643	-5.70396	-1.08702	1.28497	598	0.00634	0.00659	0.00591	0.00724
579	30.1812	13.2074	9.25008	2.41779	579	0.01062	0.01116	0.01107	0.01066	597.9	-17.3841	-5.5568	-0.70911	1.11915	597.9	0.00632	0.00661	0.00593	0.00726
578	30.0345	13.8305	8.30583	2.87872	578	0.01075	0.01131	0.01114	0.01087	597.8	-17.6979	-5.42069	-0.68046	0.84132	597.8	0.00632	0.00665	0.00592	0.00728
577	30.1556	13.2504	7.1862	1.40898	577	0.01082	0.0115	0.01124	0.01097	597.7	-17.8684	-5.08741	-0.78093	1.01792	597.7	0.00634	0.00669	0.00592	0.00728
576	30.5967	15.5009	6.83694	0.50517	576	0.01085	0.0116	0.01127	0.01103	597.6	-17.6386	-5.34038	-0.97461	0.94304	597.6	0.00639	0.0067	0.00594	0.00729
575	33.6148	14.3386	9.02844	-1.13495	575	0.01089	0.01183	0.01141	0.011	597.5	-17.7117	-5.37831	-0.88385	0.97954	597.5	0.00641	0.00671	0.00596	0.00728
574	35.3908	14.7231	8.88677	0.31112	574	0.01104	0.01192	0.01151	0.01115	597.4	-17.8724	-5.51493	-1.04022	0.97767	597.4	0.00643	0.00669	0.00598	0.00731
573	37.5933	15.5441	11.6474	-0.04884	573	0.0113	0.01202	0.01174	0.01133	597.3	-17.9089	-5.57242	-0.85492	0.60128	597.3	0.00643	0.00667	0.00598	0.00732
572	38.141	16.7673	9.61211	0.66221	572	0.01142	0.01207	0.0119	0.01164	597.2	-18.003	-5.44747	-1.29115	0.19601	597.2	0.00642	0.00665	0.00597	0.00736
571	37.8249	17.2214	9.17668	1.4093	571	0.01157	0.01226	0.01206	0.01172	597.1	-18.2033	-5.94548	-1.62725	0.28295	597.1	0.00643	0.00664	0.00597	0.00737
570	39.4518	17.7889	7.80151	3.12175	570	0.01179	0.01246	0.01227	0.0119	597	-18.3127	-6.22114	-1.90821	0.48668	597	0.00646	0.00666	0.00599	0.00739
569	42.523	18.2688	9.35799	1.69156	569	0.01203	0.0127	0.01241	0.01191	596.9	-18.1007	-6.46531	-1.91523	0.39693	596.9	0.00649	0.00664	0.006	0.00737
568	44.2423	19.1469	10.1188	0.14376	568	0.01223	0.01287	0.01243	0.01192	596.8	-18.1099	-6.8406	-1.85886	0.41061	596.8	0.00652	0.00666	0.00604	0.0074
567	46.8013	19.6266	12.1568	0.40155	567	0.01229	0.01302	0.0125	0.01202	596.7	-17.9731	-6.70678	-2.07689	1.09863	596.7	0.00652	0.00665	0.00605	0.00744
566	47.8979	20.4218	12.3806	0.41398	566	0.01233	0.0131	0.01264	0.01225	596.6	-18.1839	-7.36014	-2.30015	1.76582	596.6	0.00652	0.00668	0.0061	0.00747
565	49.7041	20.5348	12.5818	0.78175	565	0.01241	0.01327	0.01288	0.01251	596.5	-18.1689	-7.15965	-1.98409	1.49919	596.5	0.0065	0.00665	0.00611	0.00748
564	50.1674	22.1918	11.7489	2.46562	564	0.01263	0.01345	0.01322	0.01278	596.4	-18.5263	-7.43528	-1.68449	1.80578	596.4	0.00645	0.00664	0.00614	0.00749
563	50.0283	23.9757	11.18	1.8234	563	0.01286	0.01364	0.01348	0.01304	596.3	-18.1254	-7.88555	-2.18868	2.14624	596.3	0.00644	0.00665	0.00614	0.00748
562	52.3182	26.6286	13.0059	2.68762	562	0.01316	0.01387	0.01361	0.01322	596.2	-18.2262	-7.82416	-2.21167	2.03364	596.2	0.00646	0.00667	0.00613	0.0075
561	54.8866	27.2846	12.776	3.71134	561	0.01338	0.01407	0.01377	0.01332	596.1	-18.4408	-7.35863	-2.58261	2.09445	596.1	0.00649	0.00669	0.00615	0.00751
560	58.1402	27.5763	13.1134	3.75129	560	0.0136	0.01433	0.01403	0.01335	596	-18.5039	-7.86229	-2.49064	1.54285	596	0.00653	0.00671	0.00615	0.00755
559	59.8828	26.9923	12.8212	2.68921	559	0.01381	0.0146	0.0143	0.01364	595.9	-18.2566	-7.80289	-2.03359	1.37155	595.9	0.00655	0.00672	0.00612	0.00755
558	61.8388	26.8185	14.139	2.31277	558	0.01413	0.01485	0.01451	0.01395	595.8	-18.203	-7.63711	-1.58573	1.37453	595.8	0.00653	0.00672	0.00613	0.00758
557	63.367	28.0459	15.9312	1.43745	557	0.01428	0.01504	0.01474	0.01425	595.7	-18.2153	-7.64881	-1.44835	1.07713	595.7	0.00656	0.00676	0.00619	0.00758
556	65.4674	28.8706	15.7567	0.41122	556	0.0145	0.01522	0.01494	0.01444	595.6	-18.3517	-7.60208	-1.13783	1.21177	595.6	0.00658	0.0068	0.0062	0.00761
555	66.7683	29.0693	17.6165	-0.72698	555	0.01474	0.01541	0.01513	0.01458	595.5	-18.4792	-7.85061	-1.15115	1.11299	595.5	0.00657	0.00682	0.0062	0.00762
554	69.8071	31.1893	16.547	0.33044	554	0.01498	0.01563	0.01534	0.01483	595.4	-18.5007	-7.79012	-1.38529	1.23724	595.4	0.00659	0.00681	0.00619	0.00763
553	71.5665	31.7725	17.782	-0.0654	553	0.0153	0.01595	0.01562	0.01508	595.3	-18.5569	-7.52981	-1.72391	0.87059	595.3	0.00661	0.00681	0.00621	0.0076
552	75.5815	35.1757	18.022	-0.33676	552	0.01548	0.01618	0.01593	0.01544	595.2	-18.7246	-7.31674	-1.92503	0.9692	595.2	0.00667	0.00682	0.00618	0.00762
551	77.0022	36.1209	18.9151	-1.48968	551	0.01565	0.01643	0.0163	0.0158	595.1	-19.2069	-7.15084	-2.48064	1.05355	595.1	0.00673	0.00685	0.00621	0.00764
550	80.2528	38.0701	19.4122	-2.25701	550	0.01593	0.01683	0.01649	0.01601	595	-19.0717	-7.33275	-2.61457	0.70209	595	0.00673	0.00688	0.00623	0.00767
549	83.9083	39.9835	20.4399	-1.95178	549	0.01632	0.0172	0.01676	0.01634	594.9	-18.5019	-7.43618	-2.56403	0.54149	594.9	0.00676	0.00685	0.00623	0.00766
548	85.2703	39.606	18.6316	-0.61272	548	0.01675	0.01753	0.0171	0.0165	594.8	-18.7417	-6.79033	-2.79443	-0.20176	594.8	0.00678	0.00683	0.00623	0.00766
547	88.8127	40.1077	19.7605	0.35896	547	0.01701	0.01786	0.01741	0.01688	594.7	-18.8103	-6.91478	-2.60723	-0.69688	594.7	0.0068	0.00678	0.00626	0.00769
546	90.5978	42.7313	20.1017	0.42632	546	0.01727	0.01815	0.01769	0.01711	594.6	-19.2731	-7.00973	-2.83744	-0.47844	594.6	0.00681	0.00675	0.00626	0.00768
545	94.3791	45.4275	20.5373	2.57207	545	0.01756	0.01839	0.01793	0.01747	594.5	-19.1361	-6.81828	-2.71118	-0.54721	594.5	0.00683	0.0067	0.00629	0.00768
544	98.4602	49.296	23.9977	0.71329	544	0.01788	0.01873	0.01829	0.01777	594.4	-19.2984	-6.92128	-2.68196	-0.82042	594.4	0.00685	0.0067	0.0063	0.00771
543	100.412	50.5105	23.1355	2.77322	543	0.01821	0.01913	0.01872	0.01807	594.3	-19.6136	-6.41594	-2.49989	-0.70573	594.3	0.00682	0.00666	0.00629	0.00771
542	102.748	52.238	25.9026	-0.04043	542	0.01858	0.01955	0.01901	0.01856	594.2	-19.3642	-6.36175	-2.22801	-0.70957	594.2	0.0068	0.00668	0.00631	0.00772
541	109.197	54.6856	26.4563	0.04182	541	0.01897	0.01987	0.01935	0.0189	594.1	-19.4238	-6.07972	-2.61477	-0.47687	594.1	0.00679	0.00672	0.0063	0.00771
540	113.369	55.8855	28.0757	0.68103	540	0.01951	0.02027	0.01975	0.01925	594	-19.664	-5.87133	-2.84435	-0.43782	594	0.00678	0.00678	0.00629	0.0077
539	117.064	56.9119	29.5708	1.62812	539	0.02002	0.0206	0.02018	0.01967	593.9	-19.6285	-6.00713	-3.01139	-0.38084	593.9	0.0068	0.00679	0.0063	0.00768
538	121.395	57.5221	29.14	0.4537	538	0.02046	0.02103	0.02057	0.02016	593.8	-19.8403	-5.74655	-2.84078	-0.55031	593.8	0.00683	0.00682	0.00631	0.00765
537	126.209	57.0854	28.5794	0.64113	537	0.02095	0.02139	0.02115	0.02072	593.7	-20.01	-5.56388	-2.76858	-0.55301	593.7	0.00681	0.0068	0.00634	0.00765
536	134.667	57.6503	29.7898	-0.604	536	0.02135	0.02191	0.02154	0.02117	593.6	-20.0004	-5.3425	-2.66152	-0.76904	593.6	0.0068	0.00686	0.00635	0.00767
535	139.215	60.9958	29.7107	0.2043	535	0.02189	0.02243	0.02211	0.02151	593.5	-20.0069	-4.65993	-2.66893	-0.75826	593.5	0.00682	0.00688	0.00635	0.00768
534	145.424	65.3855	31.6385	1.11807	534	0.02234	0.02296	0.02254	0.02192	593.4	-20.1095	-4.87497	-2.44058	-0.95367	593.4	0.00682	0.00692	0.00638	0.00768
533	148.386	68.3411	34.0731	-0.20029	533	0.02293	0.02352	0.02303	0.02239	593.3	-19.8803	-4.60309	-2.5036	-1.14373	593.3	0.00683	0.00691	0.00639	0.00765
532	153.378	69.9792	33.1666	-0.12314	532	0.02326	0.02405	0.02347	0.02294	593.2	-19.9511	-4.6035	-2.43154	-0.75159	593.2	0.00686	0.00692	0.00638	0.00764
531	158.072	71.237	34.2648	0.05294	531	0.02386	0.02456	0.02393	0.02345	593.1	-19.7643	-4.64337	-2.67723	-1.13589	593.1	0.00689	0.00694	0.00638	0.00766
530	163.903	73.7756	34.3706	-0.50425	530	0.02432	0.02514	0.02448	0.02412	593	-20.2047	-4.54157	-2.5177	-1.27055	593	0.0069	0.00696	0.00638	0.00768
529	168.935	76.8386	39.0636	-2.81268	529	0.02497	0.02572	0.02513	0.0248	592.9	-19.8377	-4.55819	-2.50822	-1.0842	592.9	0.00691	0.00698	0.00642	0.00767
528	173.704	79.0106	41.0494	-0.73224	528	0.02555	0.02624	0.02571	0.02544	592.8	-19.7619	-4.67662	-2.28897	-1.38264	592.8	0.00691	0.007	0.00645	0.00765
527	178.978	82.9939	41.2998	-0.79427	527	0.02606	0.02682	0.02635	0.02605	592.7	-19.9448	-4.46108	-2.24809	-1.09014	592.7	0.00689	0.00703	0.00646	0.00766
526	184.953	86.7541	40.2921	-1.22729	526	0.02666	0.02748	0.02702	0.02663	592.6	-20.1457	-4.54641	-2.66385	-1.13321	592.6	0.00686	0.00704	0.00649	0.00766
525	191.704	91.3596	41.7839	-2.71154	525	0.02735	0.02815	0.02767	0.02713	592.5	-20.1025	-5.10117	-2.89401	-1.16465	592.5	0.00691	0.00708	0.00651	0.00765
524	199.734	94.7647	42.0763	-2.00349	524	0.02811	0.02894	0.02833	0.02779	592.4	-19.8258	-4.8011	-3.26259	-1.23133	592.4	0.00691	0.00709	0.00651	0.00767
523	207.864	99.3901	45.309	-1.59251	523	0.02888	0.02955	0.02904	0.02846	592.3	-20.1929	-5.008	-3.35815	-0.98492	592.3	0.00694	0.0071	0.00648	0.00767
522	215.704	102.941	47.1269	-1.86204	522	0.02967	0.03031	0.02969	0.02919	592.2	-20.5396	-4.74096	-3.19998	-1.05125	592.2	0.00693	0.00707	0.00649	0.00768
521	224.66	106.995	48.2966	1.04625	521	0.03043	0.03101	0.03055	0.02999	592.1	-20.1405	-5.27723	-2.76767	-0.95607	592.1	0.00695	0.00709	0.00651	0.00768
520	231.681	108.831	52.1159	2.72289	520	0.03116	0.03187	0.03126	0.03063	592	-20.2482	-5.50807	-2.38968	-0.95227	592	0.00697	0.0071	0.0065	0.00771
519	238.895	112.553	55.624	2.76345	519	0.03196	0.03268	0.03217	0.03138	591.9	-20.0234	-5.34138	-2.31543	-1.28772	591.9	0.00694	0.00711	0.00654	0.00773
518	243.777	117.794	60.2166	-0.5796	518	0.03292	0.03358	0.03311	0.03219	591.8	-20.1225	-5.61666	-1.91555	-1.2034	591.8	0.00696	0.00709	0.00653	0.00774
517	254.978	123.824	63.2048	0.84178	517	0.03391	0.03446	0.03403	0.03312	591.7	-20.3585	-5.39438	-1.54215	-1.17142	591.7	0.00698	0.00706	0.00651	0.00771
516	265.507	127.14	64.6775	1.55772	516	0.03484	0.03536	0.03486	0.03406	591.6	-20.434	-5.50507	-1.66745	-0.99698	591.6	0.00699	0.00706	0.00651	0.00771
515	277.811	130.22	65.2817	0.43043	515	0.03572	0.03633	0.0357	0.03511	591.5	-20.114	-5.5568	-1.71114	-1.02425	591.5	0.007	0.00709	0.00653	0.00773
514	289.538	133.549	63.7383	-1.12959	514	0.0366	0.03735	0.03671	0.03585	591.4	-20.2209	-5.88645	-1.87668	-0.71951	591.4	0.00699	0.00712	0.00657	0.00772
513	299.193	141.947	67.7654	-1.30385	513	0.03768	0.0384	0.03781	0.03681	591.3	-19.6114	-5.57017	-1.74396	-0.5977	591.3	0.00699	0.00715	0.00653	0.00773
512	312.025	146.664	73.4063	-1.23301	512	0.03859	0.03949	0.0389	0.03785	591.2	-20.1544	-5.85978	-1.71349	-0.64959	591.2	0.00702	0.00717	0.00658	0.00774
511	323.966	154.122	76.6735	-0.2717	511	0.0396	0.04069	0.04017	0.03896	591.1	-20.0952	-6.06991	-1.56358	-0.02811	591.1	0.00701	0.00717	0.00656	0.00774
510	336.812	164.286	79.877	-0.3932	510	0.04076	0.0418	0.04118	0.04022	591	-19.8258	-6.15649	-1.45058	0.19241	591	0.007	0.00722	0.0066	0.00777
509	351.026	172.098	84.025	-1.32199	509	0.04194	0.04305	0.04248	0.04129	590.9	-20.198	-5.6886	-1.85832	0.10377	590.9	0.00701	0.00722	0.00662	0.00779
508	363.593	175.857	85.6378	-2.51711	508	0.04325	0.04413	0.04362	0.04237	590.8	-20.7465	-6.01405	-1.64196	0.18278	590.8	0.00702	0.00723	0.00662	0.00781
507	379.531	177.986	88.085	-0.4585	507	0.04442	0.04542	0.04463	0.04362	590.7	-20.6334	-6.5048	-1.32818	0.4335	590.7	0.00703	0.0072	0.00665	0.00785
506	394.99	186.135	88.9248	0.26619	506	0.04565	0.04664	0.0458	0.04493	590.6	-20.7319	-6.14383	-1.15164	0.67963	590.6	0.00704	0.00721	0.00667	0.00785
505	408.1	195.579	94.8628	1.43602	505	0.04713	0.04819	0.04714	0.04638	590.5	-20.4852	-6.16399	-1.21555	0.87602	590.5	0.00706	0.00721	0.00668	0.00789
504	422.448	201.596	98.1206	4.72928	504	0.04862	0.04957	0.04862	0.04765	590.4	-20.4225	-6.20712	-1.33091	0.90822	590.4	0.00708	0.00727	0.00667	0.0079
503	435.736	206.069	99.5216	3.83114	503	0.05014	0.0509	0.04993	0.04908	590.3	-20.6548	-6.08306	-1.42065	1.14403	590.3	0.00708	0.00725	0.00668	0.00791
502	452.547	215.201	101.889	1.48627	502	0.05174	0.05222	0.05148	0.05055	590.2	-20.4715	-6.02404	-1.45006	1.19595	590.2	0.00707	0.00726	0.00668	0.00792
501	468.214	221.862	102.54	-0.14399	501	0.05313	0.05377	0.05309	0.05183	590.1	-20.3723	-6.3983	-1.75911	0.56159	590.1	0.00708	0.00728	0.0067	0.00796
500	480.727	228.604	111.286	-1.29734	500	0.05456	0.05526	0.05476	0.0532	590	-20.5356	-6.55621	-1.61103	0.17915	590	0.00708	0.00727	0.00671	0.00799
499	497.059	237.085	113.475	2.38215	499	0.05613	0.05706	0.05639	0.05474	589.9	-20.6244	-6.54931	-1.74715	-0.15962	589.9	0.00708	0.00732	0.00673	0.00802
498	519.318	245.844	122.591	2.43351	498	0.0579	0.05883	0.05812	0.05655	589.8	-20.7796	-6.55315	-1.71591	-0.16623	589.8	0.00712	0.00737	0.00679	0.00803
497	540.823	256.343	127.341	-1.54155	497	0.05983	0.06058	0.05992	0.05805	589.7	-21.0177	-6.41448	-1.1934	0.06093	589.7	0.00712	0.00738	0.0068	0.00802
496	558.177	266.044	130.18	-3.32606	496	0.06155	0.06231	0.06152	0.0599	589.6	-21.4661	-6.48286	-1.19419	-0.40695	589.6	0.00718	0.00736	0.00683	0.00807
495	574.372	276.391	136.433	-3.7094	495	0.06325	0.06406	0.06352	0.06171	589.5	-21.4756	-6.63109	-1.45954	0.50203	589.5	0.00721	0.00736	0.00682	0.00811
494	590.469	285.352	142.009	-2.07515	494	0.06514	0.06598	0.0654	0.06364	589.4	-21.4101	-6.63385	-1.70449	0.72687	589.4	0.00722	0.00734	0.00684	0.00812
493	615.817	295.843	148.74	-2.78231	493	0.0671	0.06788	0.06742	0.06563	589.3	-21.4761	-6.7372	-1.73342	0.53213	589.3	0.00726	0.00731	0.0068	0.00812
492	634.749	304.774	154.025	-4.89941	492	0.06891	0.06978	0.06933	0.06742	589.2	-21.8862	-6.6844	-1.68222	0.51849	589.2	0.00728	0.0073	0.00682	0.00814
491	666.157	319.905	151.753	-3.69804	491	0.07115	0.07214	0.0713	0.06944	589.1	-22.0749	-6.73721	-1.57831	0.45762	589.1	0.00731	0.00732	0.00684	0.00817
490	690.173	334.092	156.478	-3.71059	490	0.07317	0.07435	0.07321	0.07146	589	-22.0238	-6.46907	-1.26442	0.16886	589	0.0073	0.00732	0.00688	0.00818
489	716.721	346.967	163.329	-5.17455	489	0.07542	0.07667	0.07543	0.07363	588.9	-22.1848	-6.22379	-1.62464	-0.38623	588.9	0.00735	0.00734	0.00689	0.00816
488	742.206	359.956	172.033	-4.36347	488	0.07781	0.07885	0.07778	0.07583	588.8	-22.3476	-5.87582	-2.0322	-0.49993	588.8	0.00736	0.00737	0.00687	0.00816
487	766.117	373.553	181.989	-4.88307	487	0.08018	0.08134	0.08016	0.07802	588.7	-22.4465	-5.62392	-2.24576	-0.33249	588.7	0.00738	0.00738	0.00689	0.00818
486	790.936	387.256	192.14	-3.799	486	0.0825	0.08386	0.08278	0.08056	588.6	-22.4334	-5.41133	-2.21719	-0.12146	588.6	0.00735	0.0074	0.0069	0.0082
485	820.199	403.038	197.316	-2.5918	485	0.08527	0.08651	0.08548	0.08336	588.5	-22.5769	-4.70304	-2.24039	0.02014	588.5	0.00737	0.00743	0.00689	0.00822
484	853.246	418.998	204.827	-3.97092	484	0.08809	0.08908	0.08791	0.08604	588.4	-23.0469	-4.58157	-2.19573	0.47518	588.4	0.00733	0.00747	0.00691	0.00825
483	886.097	435.171	207.601	-5.92261	483	0.0911	0.09192	0.0906	0.08852	588.3	-23.0041	-4.11779	-2.50716	0.45653	588.3	0.00737	0.00751	0.0069	0.00825
482	917.06	449.841	216.744	-6.06955	482	0.09384	0.09461	0.09344	0.09115	588.2	-23.2882	-4.08667	-2.51187	0.73718	588.2	0.00736	0.00751	0.00693	0.00827
481	954.078	463.806	227.775	-2.31336	481	0.09715	0.09772	0.09669	0.09422	588.1	-23.5201	-4.27502	-2.71102	1.08725	588.1	0.00736	0.00755	0.00695	0.0083
480	992.42	480.616	237.249	-1.00089	480	0.10057	0.10075	0.09992	0.09736	588	-23.5345	-4.41464	-2.83187	0.87754	588	0.00735	0.00758	0.00696	0.00832
479	1034.1	500.839	247.937	3.51065	479	0.10391	0.10397	0.10306	0.10041	587.9	-23.4778	-4.56681	-3.00204	0.69181	587.9	0.00734	0.00757	0.00694	0.00831
478	1072.56	522.051	262.205	2.87134	478	0.10729	0.10722	0.1064	0.10344	587.8	-23.7936	-4.80762	-3.21629	-0.25228	587.8	0.00737	0.00758	0.00694	0.00831
477	1104.96	537.955	265.273	-1.08329	477	0.11035	0.11038	0.10994	0.10666	587.7	-23.5261	-4.67705	-3.08262	-0.5337	587.7	0.00737	0.00758	0.00696	0.00831
476	1144.2	565.715	274.093	1.23476	476	0.1139	0.11427	0.11341	0.11036	587.6	-23.908	-4.94542	-2.77165	-0.35819	587.6	0.0074	0.00758	0.00696	0.00832
475	1183.67	589.382	281.339	-3.35656	475	0.11769	0.11804	0.11703	0.11411	587.5	-23.9715	-4.58761	-3.00691	-0.59482	587.5	0.0074	0.00759	0.00698	0.00832
474	1237.76	618.99	296.199	-1.20245	474	0.1219	0.1221	0.12074	0.11811	587.4	-23.8857	-4.69821	-2.67897	-0.90432	587.4	0.00739	0.00759	0.007	0.00833
473	1282.42	642.458	309.866	-1.22115	473	0.12591	0.12578	0.12467	0.12193	587.3	-24.2529	-5.53622	-3.0232	-1.35889	587.3	0.00737	0.00763	0.00702	0.00834
472	1329.88	664.775	315.132	2.88444	472	0.13013	0.12962	0.12824	0.1255	587.2	-24.4304	-5.8923	-3.09616	-1.70854	587.2	0.00735	0.00767	0.00703	0.00837
471	1373.21	686.75	326.435	3.66538	471	0.13379	0.13375	0.13198	0.12922	587.1	-24.451	-5.91032	-3.05351	-1.68052	587.1	0.00739	0.00764	0.00705	0.00838
470	1415.33	705.37	336.261	1.81851	470	0.13751	0.13756	0.13584	0.13303	587	-24.6285	-6.21477	-3.18571	-1.63447	587	0.00743	0.00764	0.00706	0.0084
469	1463.92	731.02	344.297	-5.99939	469	0.14154	0.14184	0.14063	0.13734	586.9	-24.9395	-6.64635	-3.304	-1.58937	586.9	0.00745	0.00764	0.00708	0.00839
468	1511.41	757.008	355.452	-10.0982	468	0.14606	0.14619	0.14465	0.14147	586.8	-25.184	-6.55423	-3.68024	-1.29105	586.8	0.00746	0.00764	0.00709	0.0084
467	1567.41	786.473	367.611	-4.46237	467	0.15084	0.15068	0.14921	0.14595	586.7	-25.3944	-6.84459	-3.94679	-0.7718	586.7	0.0075	0.00766	0.00711	0.0084
466	1619.99	812.697	380.439	-1.69156	466	0.15539	0.1551	0.15366	0.15012	586.6	-25.6879	-6.69563	-3.90976	-0.87358	586.6	0.0075	0.00764	0.00711	0.00839
465	1673.18	841.702	398.842	1.94242	465	0.16024	0.15968	0.15853	0.15466	586.5	-25.5631	-6.84565	-4.19156	-0.92525	586.5	0.00751	0.0076	0.00708	0.00841
464	1726.34	874.518	411.645	0.2498	464	0.16503	0.16399	0.16344	0.1593	586.4	-25.1159	-6.47144	-4.76569	-0.89672	586.4	0.00749	0.00762	0.00709	0.00842
463	1781.9	903.819	426.784	1.10336	463	0.16987	0.1689	0.16799	0.16346	586.3	-25.3418	-6.46656	-5.1591	-0.58586	586.3	0.00746	0.00763	0.00707	0.0084
462	1837.19	931.027	445.416	3.1551	462	0.1746	0.1736	0.17273	0.16773	586.2	-25.1226	-6.53034	-4.89539	-1.33732	586.2	0.00744	0.00765	0.00711	0.00838
461	1889.21	956.263	460.631	3.31489	461	0.17914	0.17791	0.17779	0.17272	586.1	-25.146	-6.25278	-4.33932	-1.19328	586.1	0.00745	0.00766	0.0071	0.00835
460	1943.84	983.332	479.917	5.37887	460	0.18415	0.18269	0.1825	0.17795	586	-25.2133	-5.80413	-4.16936	-0.72314	586	0.00747	0.00768	0.00716	0.00839
459	1991.41	1030.59	492.153	6.76505	459	0.18902	0.18839	0.18733	0.18315	585.9	-24.8981	-5.79039	-4.28625	-0.3146	585.9	0.00745	0.00771	0.00714	0.00838
458	2060.63	1055.76	502.553	5.53386	458	0.1943	0.19355	0.19241	0.18822	585.8	-24.8207	-6.02691	-4.17411	-0.46556	585.8	0.00741	0.00769	0.00715	0.00838
457	2120.3	1091.82	519.094	9.04577	457	0.19976	0.19879	0.1977	0.19335	585.7	-24.9186	-6.19301	-4.17872	-0.28853	585.7	0.00741	0.0077	0.00717	0.00841
456	2193.2	1127.79	525.428	12.3727	456	0.20563	0.20459	0.20356	0.19895	585.6	-25.3441	-6.08358	-4.13393	0.31404	585.6	0.0074	0.00774	0.00718	0.00843
455	2253.47	1173.25	546.658	6.76842	455	0.21165	0.21075	0.20932	0.20435	585.5	-25.6807	-6.10124	-3.82961	0.50856	585.5	0.0074	0.00773	0.00721	0.00846
454	2316.01	1213.53	560.719	-0.61034	454	0.21777	0.21618	0.21516	0.20979	585.4	-25.8051	-6.33581	-3.79116	0.24979	585.4	0.0074	0.0077	0.00723	0.00846
453	2376.4	1244.76	586.211	-3.18717	453	0.22367	0.22156	0.22154	0.21524	585.3	-26.2264	-6.44643	-3.47532	0.11527	585.3	0.00741	0.00769	0.00722	0.00846
452	2441.49	1283.88	599.461	-4.90981	452	0.23026	0.22732	0.22763	0.22165	585.2	-26.0923	-7.25311	-3.67481	-0.15557	585.2	0.00738	0.00773	0.00726	0.00846
451	2518.49	1323.72	616.127	-7.46207	451	0.23632	0.23375	0.23334	0.22825	585.1	-25.4558	-7.72274	-3.90136	0.02577	585.1	0.00743	0.00768	0.00725	0.00847
450	2585.84	1374.87	638.286	2.38229	450	0.24225	0.23988	0.23966	0.23362	585	-25.5952	-8.51677	-3.78397	-0.10913	585	0.00742	0.00768	0.00729	0.00847
449	2663.9	1412.61	662.846	9.21986	449	0.24861	0.24584	0.24632	0.23925	584.9	-25.9038	-8.69714	-3.6528	0.03295	584.9	0.00741	0.00763	0.00729	0.00849
448	2741.04	1450.16	694.122	10.4648	448	0.25557	0.25219	0.25324	0.24581	584.8	-26.0404	-8.47048	-3.43977	-0.07923	584.8	0.00738	0.00762	0.00727	0.00849
447	2814	1495.83	713.371	3.17635	447	0.26169	0.25901	0.25929	0.25259	584.7	-26.2199	-8.56926	-3.4663	0.43942	584.7	0.00737	0.00763	0.00731	0.0085
446	2894.63	1551.62	737.698	-1.52806	446	0.26957	0.2663	0.26648	0.25994	584.6	-26.0706	-8.59315	-3.8293	0.45933	584.6	0.00738	0.00764	0.00734	0.00853
445	2986.79	1603.96	763.998	1.87299	445	0.27725	0.27372	0.27383	0.26697	584.5	-25.8964	-8.28875	-3.70375	1.25738	584.5	0.00741	0.00766	0.00737	0.00851
444	3073.76	1658.4	788.227	4.1818	444	0.28541	0.28147	0.28117	0.2743	584.4	-25.9892	-7.98746	-3.90442	1.80521	584.4	0.00746	0.0077	0.00737	0.00853
443	3171.67	1698.68	815.753	5.66323	443	0.29332	0.28839	0.28793	0.28224	584.3	-25.9341	-8.294	-4.29279	1.4188	584.3	0.00745	0.00769	0.00737	0.00853
442	3265.88	1748.27	832.798	0.03305	442	0.30144	0.29571	0.2952	0.28971	584.2	-26.2704	-8.41454	-4.52125	1.92343	584.2	0.00748	0.00767	0.00737	0.00853
441	3342.27	1804.38	858.731	-1.89833	441	0.30918	0.30312	0.30279	0.29698	584.1	-26.2396	-8.27716	-4.80061	1.64571	584.1	0.00752	0.00767	0.00736	0.00856
440	3423.93	1859.18	878.609	-5.22299	440	0.31688	0.31079	0.31062	0.30422	584	-26.0895	-8.03966	-4.76987	1.81228	584	0.00754	0.00765	0.00738	0.00856
439	3505.33	1916.9	912.125	-1.90543	439	0.32527	0.31774	0.31943	0.31201	583.9	-26.3394	-7.76282	-4.83621	1.56895	583.9	0.00757	0.00764	0.00737	0.00857
438	3592.1	1980.96	933.447	-7.20182	438	0.33322	0.32632	0.32793	0.31967	583.8	-26.2235	-7.88411	-4.71086	2.09062	583.8	0.00756	0.00764	0.00739	0.00859
437	3672.42	2042.42	965.807	-6.82446	437	0.34079	0.33436	0.33602	0.32715	583.7	-26.1074	-7.98696	-4.60273	2.41462	583.7	0.00757	0.00767	0.00738	0.00857
436	3746.07	2088.81	997.873	-8.02717	436	0.34797	0.34158	0.34382	0.33447	583.6	-26.4031	-7.97805	-4.03987	2.35109	583.6	0.00754	0.00767	0.00738	0.00855
435	3832.61	2147.59	1023.93	-0.48904	435	0.35589	0.34891	0.35087	0.34285	583.5	-26.1195	-7.74021	-3.82479	2.50528	583.5	0.00753	0.00766	0.00737	0.00856
434	3924.51	2202.03	1049.82	4.26172	434	0.36395	0.35644	0.35813	0.34942	583.4	-26.365	-7.33679	-3.83874	2.50066	583.4	0.00755	0.00766	0.00738	0.00855
433	4010.51	2262.66	1072.14	8.98737	433	0.37173	0.36323	0.36372	0.3558	583.3	-26.5168	-7.78761	-3.61361	2.0974	583.3	0.00753	0.00767	0.00737	0.00855
432	4073.88	2306.35	1099.21	10.3796	432	0.37912	0.36916	0.37131	0.362	583.2	-26.6734	-7.55716	-3.54809	2.40044	583.2	0.00754	0.00769	0.00741	0.00856
431	4135.67	2358.38	1125.24	17.0579	431	0.38602	0.37579	0.37737	0.36714	583.1	-26.9979	-7.85072	-3.4764	2.67427	583.1	0.00754	0.00771	0.00741	0.00859
430	4171.65	2402.33	1161.02	15.5019	430	0.39124	0.38249	0.38447	0.3738	583	-27.2463	-8.23402	-3.08762	2.70097	583	0.00756	0.00768	0.00745	0.0086
429	4216.5	2449.23	1180.22	11.6388	429	0.39601	0.38804	0.39022	0.37954	582.9	-27.7708	-8.58843	-3.14912	3.03185	582.9	0.00759	0.00768	0.00743	0.00865
428	4268.27	2486.82	1202.82	7.14499	428	0.40168	0.3924	0.39488	0.38554	582.8	-27.9398	-8.35992	-3.46239	2.58704	582.8	0.00761	0.00767	0.00744	0.00867
427	4317.75	2527.86	1219.94	7.07895	427	0.4069	0.39677	0.39956	0.38982	582.7	-28.2016	-8.72647	-3.45477	2.06716	582.7	0.00759	0.00768	0.00745	0.00872
426	4367.94	2571.59	1244.11	12.8003	426	0.41133	0.40156	0.40452	0.394	582.6	-28.1161	-8.6311	-3.31535	2.02774	582.6	0.00762	0.00771	0.00748	0.00872
425	4405.75	2613.85	1256.2	13.0606	425	0.41539	0.40603	0.40989	0.39828	582.5	-28.1235	-8.69652	-3.58117	2.16721	582.5	0.00764	0.00773	0.00752	0.00874
424	4426.12	2643.58	1275.72	7.83291	424	0.41871	0.40938	0.41482	0.40304	582.4	-28.3163	-8.89474	-3.3367	2.49108	582.4	0.00764	0.00772	0.00749	0.00874
423	4442	2681.55	1305.41	-8.36814	423	0.42229	0.41282	0.41913	0.40622	582.3	-27.85	-8.69992	-3.80997	2.89181	582.3	0.00768	0.00769	0.00749	0.00877
422	4469.54	2712.93	1335.82	-17.4118	422	0.42595	0.41583	0.42301	0.40995	582.2	-27.9305	-8.83908	-3.73801	2.11876	582.2	0.0077	0.0077	0.00746	0.0088
421	4503.9	2748.88	1360.62	-6.40722	421	0.43013	0.41921	0.42634	0.41364	582.1	-27.9758	-9.23363	-3.54524	2.51742	582.1	0.00773	0.00778	0.00748	0.00881
420	4534.17	2784.21	1376.57	2.00673	420	0.43421	0.42338	0.42876	0.41794	582	-28.0239	-9.54837	-4.12293	2.50124	582	0.00776	0.00781	0.00748	0.00883
419	4546.65	2800.8	1394.62	5.61287	419	0.43771	0.42543	0.43205	0.42006	581.9	-28.0578	-9.7384	-3.64997	2.58304	581.9	0.00779	0.00781	0.0075	0.00881
418	4555.32	2812.45	1407.77	3.07165	418	0.4396	0.42625	0.43546	0.42437	581.8	-28.356	-9.65666	-3.85782	2.29761	581.8	0.00782	0.00785	0.00749	0.00885
417	4565.63	2835.97	1422.48	-0.53864	417	0.44186	0.42819	0.4378	0.42765	581.7	-28.6206	-8.87807	-3.6266	1.87783	581.7	0.00783	0.00787	0.0075	0.00888
416	4566.28	2861.04	1439.63	-7.69388	416	0.44383	0.43007	0.44096	0.43178	581.6	-28.4636	-8.56478	-3.56715	1.95005	581.6	0.00783	0.00791	0.00752	0.0089
415	4570.93	2884.72	1452.41	-10.9785	415	0.44608	0.43153	0.44326	0.43425	581.5	-28.326	-8.43376	-3.55037	1.61776	581.5	0.0079	0.00793	0.00752	0.00888
414	4545.96	2891.78	1465.6	-5.28714	414	0.44679	0.43193	0.44523	0.43581	581.4	-28.5234	-8.67397	-3.69596	1.52777	581.4	0.00792	0.00794	0.00751	0.00889
413	4515.17	2897.76	1467.85	-5.93972	413	0.44629	0.43236	0.44607	0.43688	581.3	-28.8966	-8.41492	-3.51214	1.66104	581.3	0.00793	0.00795	0.00751	0.00891
412	4478.62	2886.55	1471.87	-0.28453	412	0.44509	0.43029	0.44605	0.43767	581.2	-29.1608	-8.70787	-3.28342	1.88786	581.2	0.00791	0.00796	0.00748	0.00897
411	4436.8	2876.21	1478.45	-8.34742	411	0.44367	0.428	0.44488	0.43803	581.1	-29.637	-9.13596	-3.15928	1.6326	581.1	0.00794	0.00798	0.00749	0.009
410	4383.3	2840.39	1474.92	-7.42095	410	0.44022	0.42375	0.44303	0.43755	581	-29.4627	-9.02538	-3.23395	1.86947	581	0.00797	0.008	0.00753	0.00902
409	4310.95	2812.84	1477.98	-15.3475	409	0.4363	0.42013	0.43948	0.43524	580.9	-29.7452	-9.69466	-2.82888	2.30183	580.9	0.00801	0.00803	0.00755	0.00905
408	4219.43	2770.65	1456.74	-8.73549	408	0.43049	0.41422	0.43546	0.43049	580.8	-29.6274	-9.50944	-3.02816	2.07143	580.8	0.00804	0.00805	0.00757	0.00905
407	4111.84	2728.38	1435.22	-5.69001	407	0.42373	0.40779	0.4288	0.42551	580.7	-29.8866	-9.51917	-2.86045	2.38652	580.7	0.008	0.0081	0.00758	0.00906
406	3999.81	2673.6	1417.23	3.08099	406	0.41484	0.40038	0.42204	0.42022	580.6	-29.676	-9.52545	-2.45777	2.83719	580.6	0.00801	0.00807	0.00754	0.00907
405	3882.54	2597.11	1383.6	7.2763	405	0.40586	0.39149	0.4136	0.41273	580.5	-29.6348	-9.44981	-2.18255	2.11253	580.5	0.00804	0.00809	0.00756	0.00908
404	3741.39	2508.69	1348.91	7.33536	404	0.39395	0.38086	0.40123	0.40374	580.4	-29.8755	-9.39268	-2.11817	1.92571	580.4	0.00802	0.00811	0.00759	0.00916
403	3578.64	2423.77	1314.04	9.48253	403	0.3812	0.36988	0.3907	0.39427	580.3	-29.9757	-9.02467	-2.38587	1.99275	580.3	0.00809	0.00814	0.00758	0.00917
402	3416.35	2328.35	1278.16	1.70423	402	0.36819	0.35657	0.37907	0.38358	580.2	-30.2327	-9.51513	-2.33421	1.32847	580.2	0.00809	0.00815	0.00761	0.00919
401	3277.07	2233.66	1230.34	8.23326	401	0.35636	0.34359	0.36766	0.37296	580.1	-30.33	-9.29299	-2.34747	1.29156	580.1	0.0081	0.00817	0.00762	0.00917
400	3131.13	2135.68	1181.59	1.00923	400	0.34338	0.33023	0.35414	0.36126	580	-30.0933	-8.592	-3.01339	1.9813	580	0.00815	0.00821	0.00763	0.0092
399	2966.07	2044.65	1131.37	-1.93484	399	0.32905	0.31658	0.34024	0.34956	579.9	-30.2774	-8.87333	-2.99269	1.6572	579.9	0.00817	0.00823	0.00765	0.00925
398	2795.67	1940.79	1087.39	-10.1501	398	0.31393	0.30199	0.32614	0.33645	579.8	-30.1674	-8.72716	-3.09211	1.4062	579.8	0.00818	0.00826	0.00765	0.00923
397	2633.38	1837.66	1042.41	-2.82011	397	0.29887	0.28737	0.31213	0.3215	579.7	-30.3061	-8.77385	-3.1335	1.26209	579.7	0.0082	0.00829	0.00765	0.00926
396	2487.68	1730.82	983.406	5.44773	396	0.28461	0.27255	0.29727	0.30699	579.6	-29.962	-8.62254	-3.25942	1.11468	579.6	0.00822	0.00831	0.00768	0.00929
395	2332.64	1630.09	929.255	6.21001	395	0.27028	0.25828	0.28279	0.29389	579.5	-30.1242	-8.64939	-3.53536	1.49261	579.5	0.00822	0.00832	0.00769	0.00931
394	2175.63	1532.02	879.098	1.20834	394	0.25561	0.24477	0.26834	0.28132	579.4	-30.2203	-9.10781	-3.43056	1.093	579.4	0.00822	0.00835	0.0077	0.00932
393	2025.18	1431.61	833.324	-4.04244	393	0.24181	0.23075	0.25435	0.26776	579.3	-30.3987	-9.16223	-3.31322	1.30117	579.3	0.00823	0.00832	0.00771	0.00933
392	1881.88	1330.68	787.224	-0.66649	392	0.22737	0.21734	0.24138	0.2545	579.2	-30.5171	-9.2314	-3.51236	0.91591	579.2	0.00824	0.00832	0.00772	0.00934
391	1738.84	1229.44	729.861	2.36755	391	0.21294	0.20359	0.22698	0.241	579.1	-30.7796	-9.24298	-3.44086	0.84514	579.1	0.00826	0.00838	0.00772	0.00936
390	1598.3	1132.26	677.315	7.61072	390	0.19802	0.18979	0.21195	0.2266	579	-31.0044	-9.21558	-3.4842	0.72719	579	0.00825	0.00836	0.00775	0.0094
389	1453.28	1031.84	623.011	5.83757	389	0.18324	0.17592	0.1972	0.21229	578.9	-30.5099	-9.61261	-3.57194	0.99704	578.9	0.00826	0.00836	0.00777	0.00936
388	1311.91	932.148	571.534	7.17865	388	0.16855	0.162	0.18219	0.19819	578.8	-30.4256	-9.54494	-3.81561	0.5656	578.8	0.0083	0.00837	0.00778	0.00937
387	1173.64	834.361	518.356	10.31	387	0.15409	0.148	0.16719	0.18379	578.7	-30.7096	-9.39848	-3.72509	0.61885	578.7	0.00832	0.00833	0.0078	0.0094
386	1036.5	732.855	462.489	10.9746	386	0.1398	0.13417	0.15228	0.16878	578.6	-31.2466	-9.29324	-4.07516	-0.07791	578.6	0.00834	0.00833	0.00779	0.00941
385	899.821	638.716	412.742	9.6132	385	0.12546	0.12061	0.13842	0.15391	578.5	-31.0784	-9.39793	-3.71162	-0.02075	578.5	0.00833	0.00832	0.00781	0.00941
384	771.626	534.748	360.082	5.1388	384	0.11105	0.10692	0.12347	0.13837	578.4	-31.4692	-9.28056	-3.8253	0.01304	578.4	0.00836	0.00832	0.00782	0.00942
383	639.61	444.059	301.651	0.67793	383	0.0966	0.09315	0.10839	0.12283	578.3	-31.4113	-9.41692	-4.01986	0.13974	578.3	0.00835	0.00836	0.00785	0.00944
382	527.257	359.3	254.426	-0.32591	382	0.08311	0.08076	0.09449	0.10789	578.2	-31.7293	-9.5602	-4.11047	0.32203	578.2	0.00834	0.00836	0.00786	0.00946
381	422.73	290.611	206.304	1.02198	381	0.07094	0.06901	0.08142	0.09377	578.1	-31.3278	-9.42837	-3.88271	0.76049	578.1	0.00836	0.00834	0.00787	0.00949
380	335.13	227.348	170.96	3.97431	380	0.05989	0.05851	0.06936	0.08091	578	-31.6439	-9.75597	-3.8323	0.06	578	0.00839	0.00838	0.00787	0.00949
379	259.245	171.131	131.432	2.38267	379	0.05009	0.04889	0.05831	0.06894	577.9	-31.8102	-9.83057	-3.99878	0.24745	577.9	0.00845	0.00838	0.00791	0.00947
378	195.779	123.241	100.673	5.12483	378	0.04148	0.04071	0.04863	0.05809	577.8	-31.6901	-9.61888	-4.48953	0.53167	577.8	0.00845	0.00838	0.00791	0.00949
377	142.125	86.8945	71.3022	5.65987	377	0.03412	0.03367	0.04011	0.04834	577.7	-31.6835	-9.43976	-4.27321	0.15723	577.7	0.00844	0.00839	0.00789	0.0095
376	100.52	59.8242	51.4621	0.80698	376	0.02787	0.02775	0.03285	0.03972	577.6	-31.4284	-9.32171	-4.76208	-0.32777	577.6	0.00842	0.0084	0.00791	0.00952
375	70.5012	37.9708	33.9953	-3.02874	375	0.02283	0.02286	0.02683	0.03255	577.5	-31.8737	-9.80461	-3.97792	0.0381	577.5	0.00845	0.00841	0.00794	0.00954
374	47.2214	25.2742	20.972	-2.56244	374	0.01894	0.01905	0.02209	0.02657	577.4	-31.894	-9.71898	-4.2136	0.00946	577.4	0.0085	0.0084	0.00795	0.00956
373	31.9366	14.0793	12.7952	-2.7465	373	0.01593	0.01612	0.01848	0.02201	577.3	-32.3024	-9.81873	-4.40138	0.11228	577.3	0.00849	0.00844	0.00802	0.00956
372	21.767	9.16873	8.74808	-0.94324	372	0.01349	0.01379	0.0156	0.01831	577.2	-32.7203	-10.2461	-4.58337	0.61328	577.2	0.00852	0.00842	0.00804	0.00957
371	13.8803	4.55322	4.75516	-0.14515	371	0.01167	0.01211	0.01343	0.01542	577.1	-32.7249	-10.5714	-5.03707	0.12664	577.1	0.00856	0.00844	0.00805	0.00957
370	9.69816	3.67108	2.26978	0.93832	370	0.01035	0.01086	0.01178	0.01316	577	-32.7421	-10.6525	-5.14779	0.33821	577	0.00854	0.00845	0.00807	0.00962
369	7.07893	2.13316	-0.20739	1.04646	369	0.00941	0.00995	0.01056	0.01143	576.9	-32.8869	-10.9969	-5.1109	0.60954	576.9	0.00856	0.00847	0.00807	0.00964
368	3.73705	1.97725	-0.47761	-0.12548	368	0.00865	0.00927	0.00968	0.01019	576.8	-33.0722	-11.081	-5.09189	0.88988	576.8	0.00856	0.00849	0.00807	0.00967
367	2.13712	1.07176	0.24362	-0.48386	367	0.00803	0.00878	0.00903	0.00922	576.7	-33.1374	-11.6298	-4.74253	0.21525	576.7	0.00856	0.00846	0.00809	0.00967
366	-0.08602	0.42619	0.26572	-0.53622	366	0.00768	0.00851	0.00852	0.00864	576.6	-32.8924	-11.3773	-4.77736	0.8139	576.6	0.00858	0.00848	0.00807	0.00965
365	0.64099	1.35541	0.26496	-0.68275	365	0.00746	0.0083	0.00818	0.0081	576.5	-32.7652	-11.2516	-4.46802	0.70812	576.5	0.00861	0.00846	0.00812	0.00969
364	-0.84654	1.73142	0.25243	0.09838	364	0.00725	0.00813	0.00804	0.00774	576.4	-33.0667	-11.5022	-4.33168	0.46957	576.4	0.00863	0.00847	0.00816	0.00972
363	0.25072	0.92321	0.0727	0.00875	363	0.00706	0.00807	0.00793	0.00759	576.3	-33.3201	-11.6941	-4.26352	0.52923	576.3	0.00862	0.00851	0.00811	0.00971
362	0.1546	-0.20066	0.06957	-0.25304	362	0.00698	0.00792	0.00784	0.00751	576.2	-33.2556	-11.8389	-4.3925	0.47761	576.2	0.00865	0.00852	0.00813	0.00973
361	1.80321	-0.6852	-0.96227	-0.20933	361	0.00684	0.00785	0.00761	0.00737	576.1	-33.8034	-12.1658	-4.81064	0.58341	576.1	0.00869	0.00852	0.00813	0.00979
360	2.45754	-0.34237	-0.85376	-0.06206	360	0.00688	0.0078	0.00748	0.00724	576	-33.9867	-11.9661	-4.99338	0.57785	576	0.00867	0.00855	0.00811	0.00985
359	2.15918	1.26209	-0.57493	0.89184	359	0.00676	0.00765	0.00747	0.00706	575.9	-34.2258	-11.4823	-4.93582	1.03856	575.9	0.0087	0.00857	0.00814	0.00989
358	1.80842	1.50806	0.61823	0.21135	358	0.00689	0.0076	0.00743	0.00694	575.8	-34.5083	-11.6247	-4.97926	0.86874	575.8	0.00872	0.00856	0.00817	0.00988
357	0.46499	0.24273	0.69353	-0.14001	357	0.0069	0.00751	0.00748	0.00688	575.7	-34.7007	-11.5211	-4.96554	0.83659	575.7	0.00873	0.00865	0.00816	0.00988
356	-0.50852	-0.66954	0.09466	0.43196	356	0.00694	0.0076	0.00744	0.00686	575.6	-35.1792	-11.7093	-4.73779	1.42058	575.6	0.00878	0.00864	0.00818	0.00988
355	-0.6229	-0.18703	1.1547	0.65587	355	0.00692	0.00759	0.00743	0.00696	575.5	-35.4122	-11.1775	-4.83994	2.03073	575.5	0.00873	0.00865	0.00819	0.0099
354	0.05997	-0.33403	0.10537	0.57922	354	0.00693	0.00766	0.00738	0.00697	575.4	-35.7246	-11.0906	-4.92715	2.05252	575.4	0.00868	0.0087	0.00819	0.00994
353	1.43067	-0.03331	0.13391	-0.35605	353	0.00695	0.00769	0.00737	0.00704	575.3	-35.8119	-11.4041	-4.93919	2.3539	575.3	0.00868	0.00872	0.00826	0.00998
352	1.4138	-0.21869	0.45516	0.96565	352	0.00688	0.00765	0.00735	0.007	575.2	-36.215	-11.6306	-5.1251	3.0908	575.2	0.00867	0.00874	0.00829	0.01
351	1.64058	-0.68383	1.64351	1.27799	351	0.0068	0.00767	0.00734	0.00703	575.1	-36.3445	-11.3679	-5.17999	2.90679	575.1	0.00871	0.00877	0.0083	0.01001
350	1.8806	0.06866	3.03015	1.2752	350	0.00671	0.0077	0.00735	0.007	575	-36.6943	-11.3249	-4.92979	2.90446	575	0.00876	0.00879	0.00828	0.01003
										574.9	-37.2445	-11.5037	-4.76368	2.96271	574.9	0.00876	0.00881	0.00829	0.01005
										574.8	-37.2044	-11.8013	-4.99357	3.43732	574.8	0.00877	0.00885	0.00832	0.01008
										574.7	-37.0357	-12.135	-5.00517	3.53194	574.7	0.00875	0.00887	0.00833	0.0101
										574.6	-37.215	-12.3099	-4.97286	3.59425	574.6	0.00877	0.00889	0.00838	0.01013
										574.5	-37.4318	-12.6242	-4.76095	3.56564	574.5	0.00876	0.00889	0.00842	0.01013
										574.4	-37.8258	-12.285	-5.18185	3.65655	574.4	0.00877	0.00887	0.00844	0.01012
										574.3	-37.9793	-11.421	-5.68908	3.41145	574.3	0.00878	0.00891	0.00845	0.01013
										574.2	-37.8455	-11.2489	-5.7442	3.21591	574.2	0.00881	0.00893	0.00847	0.01017
										574.1	-38.524	-10.9013	-5.77829	2.81089	574.1	0.00882	0.00895	0.00845	0.01019
										574	-38.6027	-10.9758	-5.66414	2.97595	574	0.00882	0.00896	0.00845	0.01024
										573.9	-38.7622	-10.8664	-5.65137	3.3151	573.9	0.00882	0.00897	0.00844	0.0102
										573.8	-38.4947	-10.2098	-5.07233	3.07395	573.8	0.00882	0.00897	0.00847	0.0102
										573.7	-38.9078	-9.8456	-5.42473	3.2946	573.7	0.00886	0.00896	0.00845	0.01022
										573.6	-38.7431	-9.88088	-5.66417	2.9241	573.6	0.0089	0.00894	0.00848	0.01026
										573.5	-38.6984	-10.028	-5.28064	2.48415	573.5	0.00891	0.00895	0.00852	0.01029
										573.4	-38.8773	-10.4948	-5.36554	2.99252	573.4	0.0089	0.00898	0.00855	0.01031
										573.3	-39.3319	-10.6398	-5.07996	3.01665	573.3	0.00893	0.009	0.00856	0.01029
										573.2	-39.2863	-10.5702	-5.45713	2.95459	573.2	0.00894	0.00902	0.00856	0.01031
										573.1	-39.2311	-10.7215	-5.81733	3.41793	573.1	0.00897	0.00904	0.00861	0.01033
										573	-39.7847	-10.7327	-5.46547	3.54874	573	0.00898	0.00907	0.00863	0.01032
										572.9	-40.091	-10.5317	-5.3631	2.86585	572.9	0.00901	0.00912	0.00867	0.01029
										572.8	-39.809	-10.1277	-5.36128	3.49527	572.8	0.00901	0.00911	0.00874	0.01027
										572.7	-40.2189	-10.2433	-5.08635	3.36912	572.7	0.00901	0.00913	0.00879	0.01024
										572.6	-40.4468	-10.3209	-5.4279	3.02851	572.6	0.00902	0.00914	0.00879	0.01028
										572.5	-40.7696	-10.831	-5.7614	2.9141	572.5	0.00907	0.00912	0.00881	0.01032
										572.4	-40.6882	-10.3781	-6.27199	1.98767	572.4	0.00907	0.00912	0.00883	0.01032
										572.3	-40.4145	-10.848	-6.02389	1.95388	572.3	0.00911	0.00915	0.00886	0.01033
										572.2	-40.3656	-10.9481	-5.8362	1.56016	572.2	0.00919	0.00916	0.00886	0.01033
										572.1	-40.0364	-10.3281	-6.25286	1.6174	572.1	0.0092	0.0092	0.00886	0.01033
										572	-40.0465	-10.9385	-5.84548	1.03668	572	0.00922	0.00923	0.00889	0.01037
										571.9	-40.1283	-11.2996	-5.66913	1.38211	571.9	0.00926	0.00925	0.0089	0.01038
										571.8	-40.199	-11.5961	-5.66168	1.3883	571.8	0.00926	0.00926	0.00896	0.01038
										571.7	-39.8397	-11.7789	-5.75926	1.15535	571.7	0.00926	0.00929	0.00898	0.0104
										571.6	-40.3638	-11.4287	-5.80207	1.07089	571.6	0.00929	0.00931	0.009	0.01043
										571.5	-40.6178	-11.3516	-5.97952	1.43622	571.5	0.00932	0.00931	0.009	0.01046
										571.4	-41.0093	-11.3685	-5.96376	1.36853	571.4	0.00933	0.00931	0.00902	0.01049
										571.3	-41.2172	-11.4887	-6.05405	0.93077	571.3	0.00936	0.00932	0.00899	0.01048
										571.2	-41.2272	-11.5606	-5.75092	1.15672	571.2	0.00938	0.00937	0.00902	0.01053
										571.1	-41.2339	-12.1321	-5.57937	1.36861	571.1	0.00938	0.00937	0.00904	0.01056
										571	-41.442	-12.1288	-6.05404	1.33732	571	0.00935	0.0094	0.00904	0.01057
										570.9	-41.4017	-12.5893	-6.07254	1.475	570.9	0.00939	0.00939	0.00907	0.01057
										570.8	-41.3697	-12.0751	-6.28434	1.36854	570.8	0.00944	0.00941	0.00908	0.01058
										570.7	-41.5989	-12.3287	-6.18268	0.7559	570.7	0.00946	0.00943	0.00906	0.01062
										570.6	-41.626	-12.7415	-6.55551	0.56889	570.6	0.00945	0.00945	0.00907	0.01067
										570.5	-41.9663	-13.092	-6.11314	0.64132	570.5	0.00946	0.00946	0.00909	0.01068
										570.4	-42.3523	-13.0822	-5.67938	1.00954	570.4	0.00945	0.00952	0.00911	0.01068
										570.3	-42.8719	-12.8822	-5.97654	1.30286	570.3	0.00944	0.00959	0.00908	0.01071
										570.2	-42.6434	-13.0934	-6.15202	0.83698	570.2	0.00947	0.0096	0.00906	0.01073
										570.1	-43.3706	-12.7885	-6.62529	0.58985	570.1	0.00946	0.0096	0.00908	0.01077
										570	-42.9977	-13.2431	-6.59634	0.86496	570	0.00946	0.00965	0.00908	0.01077
										569.9	-43.0981	-13.0104	-6.39768	0.29177	569.9	0.00946	0.00964	0.00909	0.01078
										569.8	-42.9439	-12.1712	-6.291	0.81292	569.8	0.00946	0.00969	0.00909	0.01078
										569.7	-42.6632	-12.2209	-6.362	0.8914	569.7	0.00949	0.00968	0.00908	0.0108
										569.6	-42.7189	-13.2123	-5.78643	1.33106	569.6	0.00952	0.00968	0.00907	0.01083
										569.5	-42.9945	-13.5957	-6.40563	1.46891	569.5	0.00957	0.0097	0.00907	0.01084
										569.4	-43.151	-13.8513	-6.15147	1.5119	569.4	0.00962	0.00972	0.00905	0.01087
										569.3	-43.0812	-13.72	-5.57479	1.70813	569.3	0.00962	0.00974	0.00908	0.01087
										569.2	-43.0873	-13.8471	-5.81779	1.39914	569.2	0.00964	0.00976	0.00911	0.01089
										569.1	-43.591	-14.2133	-5.57459	1.71158	569.1	0.00965	0.00977	0.00915	0.01094
										569	-43.8704	-14.2664	-5.63391	1.48794	569	0.00963	0.00978	0.00917	0.01096
										568.9	-43.7853	-14.3607	-5.3933	1.92931	568.9	0.00963	0.00977	0.00919	0.01099
										568.8	-44.1411	-14.5221	-5.42203	2.22314	568.8	0.00968	0.00977	0.00919	0.01103
										568.7	-44.4611	-13.9019	-5.69483	2.52177	568.7	0.00967	0.00977	0.00918	0.01103
										568.6	-44.8958	-13.8401	-5.97987	2.86072	568.6	0.00966	0.00975	0.00921	0.01106
										568.5	-45.5801	-13.679	-6.16083	3.07103	568.5	0.00968	0.00975	0.00918	0.0111
										568.4	-45.9609	-13.7438	-6.3217	3.43686	568.4	0.00969	0.00976	0.0092	0.01112
										568.3	-46.1515	-14.1857	-6.32994	3.07903	568.3	0.00968	0.00977	0.00923	0.0111
										568.2	-46.0123	-13.9692	-6.10969	2.63044	568.2	0.00971	0.0098	0.00926	0.01112
										568.1	-46.0509	-13.9066	-6.15815	2.68053	568.1	0.00973	0.00983	0.00926	0.01113
										568	-46.0949	-14.5137	-5.93053	2.56255	568	0.00974	0.00984	0.0093	0.01116
										567.9	-45.6401	-14.7965	-6.08622	2.64515	567.9	0.00976	0.00983	0.00929	0.01118
										567.8	-46.1169	-15.1284	-6.00746	2.88292	567.8	0.00982	0.00987	0.00928	0.0112
										567.7	-46.3085	-15.1114	-5.79725	2.88961	567.7	0.00982	0.00989	0.00931	0.01121
										567.6	-46.1436	-15.3878	-5.69337	2.72475	567.6	0.00982	0.0099	0.00932	0.01125
										567.5	-46.4659	-15.2005	-5.49567	2.76504	567.5	0.00981	0.00994	0.00934	0.01127
										567.4	-46.5069	-15.4628	-5.5374	3.2669	567.4	0.00983	0.00995	0.00939	0.01129
										567.3	-47.0392	-15.5734	-5.15698	3.57543	567.3	0.00988	0.01	0.00942	0.0113
										567.2	-47.381	-14.7895	-5.65123	3.08588	567.2	0.00989	0.01002	0.00946	0.01133
										567.1	-47.2144	-15.1027	-5.39476	3.13351	567.1	0.00995	0.01002	0.00945	0.01136
										567	-47.4085	-14.9713	-5.76458	3.61233	567	0.00997	0.01001	0.00947	0.01136
										566.9	-47.4336	-15.3295	-5.23405	3.46531	566.9	0.01	0.01004	0.00949	0.01135
										566.8	-47.5233	-14.5985	-5.32896	3.92038	566.8	0.01	0.01007	0.00952	0.01136
										566.7	-47.4406	-13.845	-4.78874	4.44107	566.7	0.01003	0.01008	0.00955	0.01139
										566.6	-47.8299	-13.7377	-5.22997	4.35725	566.6	0.01006	0.01009	0.00957	0.01142
										566.5	-48.4611	-13.701	-5.48322	4.33335	566.5	0.01008	0.01013	0.0096	0.01146
										566.4	-48.6255	-14.0571	-5.48222	4.48114	566.4	0.01012	0.01012	0.00962	0.0115
										566.3	-48.9709	-13.8393	-5.73267	4.50395	566.3	0.0101	0.01013	0.00965	0.01152
										566.2	-49.1119	-13.8857	-5.96945	3.44387	566.2	0.0101	0.01015	0.00969	0.01154
										566.1	-49.4339	-13.3152	-5.5449	3.22109	566.1	0.01014	0.01018	0.0097	0.01155
										566	-49.915	-13.3762	-6.00349	3.77522	566	0.01012	0.01014	0.00974	0.01157
										565.9	-50.0709	-12.8996	-6.60826	3.24183	565.9	0.0102	0.01018	0.00975	0.01159
										565.8	-49.9256	-13.0317	-6.34184	3.55412	565.8	0.01021	0.0102	0.00975	0.01162
										565.7	-50.4398	-12.9453	-6.08535	3.83679	565.7	0.01023	0.01018	0.00975	0.01162
										565.6	-50.6985	-12.3251	-6.1649	4.08447	565.6	0.01026	0.01019	0.00978	0.01164
										565.5	-50.9837	-12.711	-6.5911	3.93714	565.5	0.01029	0.01023	0.00977	0.01164
										565.4	-51.6985	-12.5052	-6.41696	3.6598	565.4	0.01033	0.01026	0.00979	0.01165
										565.3	-51.4665	-12.3474	-6.49232	3.17189	565.3	0.01032	0.01028	0.00981	0.0117
										565.2	-51.4414	-12.6954	-6.1503	2.69736	565.2	0.01034	0.01032	0.00983	0.0117
										565.1	-51.253	-13.3457	-5.95702	2.66836	565.1	0.01034	0.01032	0.00984	0.01168
										565	-51.1961	-13.0682	-5.75615	2.47181	565	0.01039	0.01034	0.00986	0.01172
										564.9	-51.6214	-12.4776	-5.59751	2.57381	564.9	0.01044	0.01036	0.00989	0.01176
										564.8	-52.0078	-13.3132	-5.85098	2.98828	564.8	0.01042	0.01037	0.00991	0.01178
										564.7	-52.0663	-13.5855	-5.67837	3.18256	564.7	0.01042	0.01039	0.0099	0.01178
										564.6	-52.5868	-12.9716	-5.66835	3.50074	564.6	0.01043	0.01041	0.00991	0.01182
										564.5	-52.8135	-12.4882	-5.49291	2.72623	564.5	0.01042	0.0104	0.00991	0.01178
										564.4	-53.237	-12.0269	-5.42082	2.69909	564.4	0.01043	0.01045	0.0099	0.01181
										564.3	-53.0169	-12.219	-5.41404	2.82017	564.3	0.01046	0.01049	0.00993	0.01183
										564.2	-53.0973	-12.0404	-5.5027	2.85922	564.2	0.01045	0.01048	0.00994	0.01187
										564.1	-52.9604	-12.776	-5.78563	2.65258	564.1	0.01047	0.01048	0.00998	0.01189
										564	-52.9794	-12.3275	-6.12371	2.949	564	0.01049	0.0105	0.00998	0.01193
										563.9	-53.5263	-12.9569	-6.14736	3.02058	563.9	0.01052	0.0105	0.00998	0.01193
										563.8	-53.0747	-13.472	-6.32527	3.4583	563.8	0.01054	0.0105	0.01002	0.01193
										563.7	-53.0887	-13.2705	-6.64168	3.84586	563.7	0.01055	0.01052	0.01008	0.01195
										563.6	-53.3172	-13.1322	-6.64671	3.70681	563.6	0.01057	0.01052	0.01012	0.01201
										563.5	-52.9418	-13.5718	-6.88268	2.96622	563.5	0.0106	0.01053	0.01018	0.01205
										563.4	-53.4139	-14.4707	-7.21957	2.46878	563.4	0.01064	0.01054	0.01017	0.01205
										563.3	-53.6278	-15.2418	-7.15263	2.0851	563.3	0.0106	0.01057	0.01018	0.01207
										563.2	-54.0367	-15.4626	-6.39121	2.2454	563.2	0.01067	0.01057	0.01021	0.01208
										563.1	-53.6378	-15.7345	-6.18431	2.03593	563.1	0.01065	0.01061	0.01025	0.01211
										563	-53.4935	-16.4053	-6.70322	2.04324	563	0.01068	0.01064	0.01026	0.01211
										562.9	-53.5951	-16.3448	-6.89819	2.30457	562.9	0.01071	0.01066	0.01029	0.01215
										562.8	-53.6017	-17.1029	-7.27815	2.23009	562.8	0.0107	0.01069	0.0103	0.01217
										562.7	-53.5868	-17.1357	-7.23222	1.97446	562.7	0.01069	0.01075	0.01032	0.01217
										562.6	-53.1027	-18.1628	-6.76156	2.09433	562.6	0.01065	0.01075	0.01034	0.01222
										562.5	-53.4685	-17.9772	-6.86685	1.78786	562.5	0.0107	0.01078	0.01037	0.01225
										562.4	-53.2245	-18.5287	-6.85936	1.70734	562.4	0.0107	0.01084	0.01038	0.01226
										562.3	-53.5441	-19.1599	-6.81187	1.22849	562.3	0.01076	0.01086	0.0104	0.01227
										562.2	-52.9573	-19.3955	-6.96333	1.13537	562.2	0.01076	0.01086	0.01045	0.01227
										562.1	-52.7343	-20.0185	-6.69474	1.01287	562.1	0.01076	0.01086	0.01047	0.0123
										562	-52.8324	-20.6632	-6.84138	0.94993	562	0.01078	0.01087	0.01048	0.0123
										561.9	-52.7701	-21.0026	-7.19889	0.69715	561.9	0.01082	0.01091	0.0105	0.01234
										561.8	-52.9423	-20.8034	-7.27237	0.27358	561.8	0.01082	0.01091	0.01053	0.01236
										561.7	-52.8576	-21.0585	-7.64729	-0.08072	561.7	0.01081	0.01093	0.01054	0.0124
										561.6	-52.5836	-21.7868	-7.58491	-0.40634	561.6	0.01083	0.01096	0.01057	0.01242
										561.5	-52.3939	-20.9279	-7.08873	-0.72394	561.5	0.01087	0.01097	0.01057	0.01247
										561.4	-52.7529	-20.4607	-7.10669	-0.51396	561.4	0.01091	0.01104	0.01063	0.0125
										561.3	-52.3038	-20.6412	-6.70125	-0.89306	561.3	0.01097	0.01108	0.0107	0.01252
										561.2	-52.3023	-20.7905	-6.70042	-0.57408	561.2	0.011	0.01108	0.01072	0.01256
										561.1	-52.4902	-21.3697	-6.7373	-0.4564	561.1	0.011	0.01111	0.01075	0.01255
										561	-52.9391	-21.6883	-6.88986	-0.51345	561	0.01103	0.01112	0.01077	0.0126
										560.9	-52.9265	-21.7223	-6.90815	-0.68193	560.9	0.01107	0.01113	0.01078	0.01262
										560.8	-53.2566	-22.2063	-6.7024	-1.354	560.8	0.01108	0.01113	0.01082	0.01263
										560.7	-53.3849	-22.0841	-6.92749	-1.10391	560.7	0.01109	0.01116	0.01083	0.01261
										560.6	-53.5747	-21.9741	-7.56135	-0.7167	560.6	0.01109	0.01119	0.01084	0.01266
										560.5	-53.4618	-22.1408	-7.15659	-0.43098	560.5	0.01108	0.0112	0.01086	0.01268
										560.4	-53.8814	-23.1152	-7.14671	-0.30017	560.4	0.01112	0.01125	0.01087	0.01268
										560.3	-54.2659	-22.877	-6.92607	-0.83442	560.3	0.01115	0.01126	0.01085	0.01271
										560.2	-54.4346	-22.869	-6.88365	-0.15289	560.2	0.01117	0.01128	0.01087	0.01276
										560.1	-54.7502	-22.7203	-7.15253	0.01942	560.1	0.01123	0.0113	0.0109	0.01281
										560	-54.6752	-22.752	-7.77058	-0.01741	560	0.01127	0.01132	0.01092	0.01286
										559.9	-54.5313	-22.8183	-8.07209	-0.57353	559.9	0.01128	0.01134	0.01094	0.01288
										559.8	-54.6016	-22.6681	-8.47007	-0.49677	559.8	0.0113	0.01135	0.01094	0.01291
										559.7	-55.3467	-22.6811	-8.027	-0.37711	559.7	0.01135	0.01138	0.01098	0.01292
										559.6	-55.3566	-22.5206	-7.58283	-0.24287	559.6	0.01137	0.0114	0.011	0.01295
										559.5	-55.4224	-22.3258	-7.77962	-0.10694	559.5	0.01137	0.01142	0.01106	0.01297
										559.4	-55.7709	-21.499	-8.22538	0.48671	559.4	0.01142	0.01147	0.01109	0.01299
										559.3	-56.146	-22.0947	-8.46319	-0.01438	559.3	0.01146	0.01152	0.01113	0.01301
										559.2	-56.4632	-22.336	-8.35938	0.14453	559.2	0.01147	0.01155	0.01116	0.013
										559.1	-56.8678	-22.2626	-9.12779	0.45443	559.1	0.01152	0.01156	0.01117	0.01305
										559	-57.6875	-22.8641	-9.04158	0.89578	559	0.01152	0.01161	0.01117	0.01309
										558.9	-58.3432	-22.7753	-8.59495	0.86024	558.9	0.01159	0.01165	0.01119	0.0131
										558.8	-58.4366	-22.3976	-8.71183	1.63599	558.8	0.0116	0.01166	0.01125	0.01311
										558.7	-58.6946	-22.5456	-8.39255	1.52582	558.7	0.01162	0.01166	0.01124	0.01315
										558.6	-58.8119	-22.1568	-8.53538	1.79458	558.6	0.01166	0.01168	0.01129	0.0132
										558.5	-59.3946	-22.5033	-8.37037	1.71443	558.5	0.01171	0.01172	0.01131	0.01323
										558.4	-60.3667	-22.4781	-8.75217	1.8601	558.4	0.01176	0.01172	0.01131	0.01326
										558.3	-60.7718	-22.4723	-9.51907	1.84469	558.3	0.01178	0.01173	0.01134	0.01329
										558.2	-61.4135	-22.9816	-9.75328	1.92453	558.2	0.01181	0.01177	0.01138	0.01329
										558.1	-62.2901	-23.1303	-9.92028	2.10453	558.1	0.01186	0.01179	0.01138	0.01332
										558	-62.6021	-23.7604	-10.2402	1.9764	558	0.01189	0.01184	0.01139	0.01337
										557.9	-63.4591	-23.8747	-10.639	2.35037	557.9	0.01193	0.01187	0.01142	0.01342
										557.8	-63.7896	-23.2546	-10.5146	2.22617	557.8	0.01195	0.0119	0.01145	0.01346
										557.7	-63.7789	-23.4544	-10.08	2.4755	557.7	0.01199	0.01195	0.01149	0.01346
										557.6	-64.5628	-24.0721	-10.2797	2.54237	557.6	0.01204	0.012	0.01152	0.01348
										557.5	-65.7791	-24.0932	-9.92116	3.33746	557.5	0.01207	0.01202	0.01153	0.01352
										557.4	-65.8236	-24.2894	-10.0994	2.94469	557.4	0.01211	0.01202	0.01157	0.01354
										557.3	-66.1672	-24.6893	-9.8707	2.87614	557.3	0.01215	0.01205	0.01158	0.01359
										557.2	-66.007	-24.4679	-9.76354	2.39368	557.2	0.0122	0.01207	0.01162	0.01364
										557.1	-66.1045	-24.1199	-9.45755	2.68842	557.1	0.0122	0.0121	0.01165	0.01369
										557	-66.5996	-23.8489	-9.81321	2.94914	557	0.0122	0.01215	0.01167	0.01372
										556.9	-67.1034	-24.1035	-9.83778	2.4614	556.9	0.01223	0.01217	0.01174	0.01373
										556.8	-67.5185	-23.9549	-10.1547	2.64201	556.8	0.01222	0.0122	0.01176	0.01371
										556.7	-68.1011	-24.2396	-10.092	2.64988	556.7	0.01221	0.01222	0.01181	0.01373
										556.6	-68.5201	-24.8601	-10.3131	3.04044	556.6	0.01226	0.01225	0.01181	0.01374
										556.5	-69.268	-24.9134	-10.1512	3.12012	556.5	0.01231	0.01229	0.01186	0.01374
										556.4	-69.2458	-25.0454	-10.369	3.15451	556.4	0.01232	0.01228	0.01187	0.01377
										556.3	-69.5808	-25.0262	-10.2799	2.87526	556.3	0.01235	0.01233	0.01189	0.01378
										556.2	-69.6582	-25.6004	-10.3372	2.8742	556.2	0.01238	0.01234	0.01186	0.01384
										556.1	-70.2888	-25.58	-10.1971	2.21804	556.1	0.01239	0.01237	0.01187	0.01383
										556	-70.5629	-24.9313	-10.4305	2.56619	556	0.01239	0.01235	0.01185	0.01388
										555.9	-70.3884	-24.9164	-10.5858	2.50351	555.9	0.01241	0.01235	0.01187	0.0139
										555.8	-70.508	-24.6904	-10.7428	2.78491	555.8	0.01243	0.0124	0.0119	0.01392
										555.7	-70.2653	-23.8925	-10.8054	3.36714	555.7	0.01244	0.01241	0.01196	0.01394
										555.6	-70.3798	-24.0876	-10.9782	3.08026	555.6	0.01244	0.01244	0.012	0.01397
										555.5	-70.4549	-23.7769	-11.0683	2.3051	555.5	0.01252	0.01249	0.01203	0.01403
										555.4	-70.506	-23.3913	-11.4268	2.45956	555.4	0.01253	0.01253	0.01205	0.01402
										555.3	-70.6387	-23.6016	-11.118	2.30725	555.3	0.01255	0.01258	0.01204	0.01404
										555.2	-70.8751	-23.2747	-11.4161	1.9724	555.2	0.01258	0.01258	0.01207	0.01408
										555.1	-70.6949	-23.521	-10.8537	2.00454	555.1	0.01258	0.01261	0.0121	0.01408
										555	-70.133	-23.6651	-10.1396	2.03742	555	0.01261	0.01263	0.01212	0.01407
										554.9	-70.0061	-23.6009	-9.92202	1.73245	554.9	0.01263	0.01264	0.01215	0.01407
										554.8	-69.9346	-23.5026	-9.84566	2.0628	554.8	0.01266	0.01263	0.01219	0.01408
										554.7	-70.4496	-23.3057	-10.0523	2.54403	554.7	0.0127	0.01262	0.0122	0.01409
										554.6	-70.1058	-24.0101	-9.80012	1.80449	554.6	0.01272	0.01264	0.01224	0.01409
										554.5	-70.6664	-24.6155	-10.3245	1.87223	554.5	0.01275	0.01264	0.01224	0.01412
										554.4	-71.1314	-23.8032	-10.6739	1.74303	554.4	0.01277	0.01261	0.01226	0.01412
										554.3	-71.19	-22.7517	-10.6412	1.5287	554.3	0.01276	0.01262	0.0123	0.01415
										554.2	-71.3823	-22.4769	-10.9643	0.81682	554.2	0.01278	0.01265	0.0123	0.01416
										554.1	-71.5341	-23.3505	-10.9126	1.29998	554.1	0.01281	0.01267	0.01234	0.01418
										554	-71.9458	-22.7819	-11.1282	0.55555	554	0.01282	0.0127	0.01236	0.01419
										553.9	-72.367	-22.2751	-11.3212	0.29482	553.9	0.01283	0.01274	0.01237	0.01422
										553.8	-72.5784	-22.4625	-11.9124	-0.03763	553.8	0.01287	0.01277	0.0124	0.01424
										553.7	-72.7307	-23.1047	-11.5742	0.5253	553.7	0.01291	0.01275	0.01243	0.01425
										553.6	-73.111	-22.7399	-11.3739	0.85912	553.6	0.01294	0.01276	0.01243	0.01429
										553.5	-72.4665	-23.1074	-10.7581	1.41044	553.5	0.01299	0.01277	0.01244	0.01432
										553.4	-72.6629	-22.7495	-10.3007	0.68327	553.4	0.01303	0.01281	0.01247	0.01438
										553.3	-72.8618	-22.7812	-9.64795	0.56236	553.3	0.01303	0.01282	0.0125	0.01441
										553.2	-73.6182	-22.7157	-9.69334	0.64681	553.2	0.01305	0.01282	0.01253	0.01445
										553.1	-74.2008	-22.5856	-9.64428	0.21529	553.1	0.0131	0.01285	0.01254	0.01448
										553	-74.2119	-22.6859	-9.75156	-0.07341	553	0.01314	0.01284	0.01254	0.01451
										552.9	-74.5086	-22.4242	-9.81393	0.06289	552.9	0.01317	0.01286	0.01258	0.01453
										552.8	-74.6088	-22.6123	-9.78745	0.30251	552.8	0.01319	0.01289	0.01262	0.01457
										552.7	-74.3519	-22.7868	-9.59593	-0.00865	552.7	0.01324	0.01293	0.01268	0.01454
										552.6	-75.3042	-23.2117	-9.74974	-0.39106	552.6	0.01329	0.01295	0.01273	0.01457
										552.5	-75.6974	-23.1393	-8.9571	-0.88755	552.5	0.01329	0.01295	0.01278	0.01457
										552.4	-76.555	-23.9974	-9.53429	-1.41908	552.4	0.01335	0.01299	0.01282	0.0146
										552.3	-76.7597	-24.045	-9.89283	-1.345	552.3	0.01336	0.01302	0.01283	0.01463
										552.2	-77.5746	-24.7401	-9.79074	-0.89289	552.2	0.01337	0.01305	0.01284	0.01464
										552.1	-77.9427	-24.7816	-9.56908	-0.89731	552.1	0.01341	0.0131	0.01287	0.0147
										552	-78.2301	-24.9183	-9.58241	-0.44759	552	0.01342	0.01311	0.01292	0.01475
										551.9	-78.1155	-25.0548	-9.32586	0.04329	551.9	0.01347	0.01314	0.01294	0.01478
										551.8	-78.3871	-24.6402	-9.53271	0.28749	551.8	0.01346	0.01316	0.01297	0.01481
										551.7	-79.0659	-24.5747	-10.0324	0.4819	551.7	0.01348	0.01319	0.01301	0.01485
										551.6	-78.6361	-25.004	-10.3638	0.26654	551.6	0.0135	0.0132	0.01303	0.01491
										551.5	-79.1217	-24.9015	-10.2029	-0.07681	551.5	0.01351	0.01324	0.01306	0.01496
										551.4	-79.5135	-25.0348	-10.0876	-0.6708	551.4	0.01355	0.01329	0.01312	0.01498
										551.3	-79.8712	-24.1456	-9.91303	-0.60016	551.3	0.01358	0.01331	0.01314	0.01502
										551.2	-80.0691	-23.781	-9.6857	-0.45949	551.2	0.0136	0.01334	0.01316	0.01503
										551.1	-79.9605	-24.6881	-9.03827	-0.53019	551.1	0.01362	0.01341	0.0132	0.0151
										551	-80.1389	-25.217	-8.98378	0.08772	551	0.01365	0.01343	0.01324	0.01511
										550.9	-80.0785	-25.4941	-9.00138	0.66024	550.9	0.01365	0.01346	0.0133	0.01516
										550.8	-79.9893	-24.6217	-8.50878	0.52104	550.8	0.01368	0.01351	0.01332	0.01523
										550.7	-79.9597	-24.1587	-8.28941	1.59254	550.7	0.01374	0.01354	0.01331	0.01529
										550.6	-80.5636	-24.3426	-8.33323	1.69369	550.6	0.01375	0.01358	0.01332	0.01535
										550.5	-81.1605	-24.7347	-8.48733	2.49199	550.5	0.01379	0.0136	0.01336	0.0154
										550.4	-81.6036	-24.8347	-8.68253	2.04446	550.4	0.01379	0.01363	0.01339	0.01543
										550.3	-82.4713	-25.0383	-9.31696	1.62932	550.3	0.01379	0.01367	0.01339	0.01544
										550.2	-82.7635	-24.9708	-9.15808	1.28827	550.2	0.01383	0.0137	0.01341	0.01549
										550.1	-82.3729	-24.8101	-9.64826	2.00575	550.1	0.01383	0.01372	0.01341	0.01549
										550	-82.9908	-24.8364	-9.9646	1.99465	550	0.01387	0.01377	0.01342	0.01552
										549.9	-82.2483	-25.003	-10.2017	2.28035	549.9	0.01389	0.01381	0.01342	0.01556
										549.8	-82.3072	-25.2507	-10.6279	3.20467	549.8	0.01395	0.01387	0.01345	0.0156
										549.7	-82.9467	-25.3573	-10.3254	4.05466	549.7	0.01403	0.01391	0.01351	0.01567
										549.6	-83.305	-25.6739	-9.98349	3.99302	549.6	0.01408	0.01394	0.01356	0.01572
										549.5	-83.6932	-25.3841	-10.1185	3.98031	549.5	0.01413	0.01393	0.01356	0.01578
										549.4	-83.7819	-25.4796	-10.0335	4.78808	549.4	0.01418	0.01398	0.0136	0.01583
										549.3	-83.8254	-25.843	-10.634	4.49068	549.3	0.01422	0.01403	0.01356	0.01591
										549.2	-84.3328	-25.4008	-10.797	5.00846	549.2	0.01427	0.01405	0.01358	0.01597
										549.1	-84.5932	-25.6092	-10.3705	5.0882	549.1	0.01425	0.01405	0.01359	0.01603
										549	-84.5997	-25.536	-10.6706	5.58368	549	0.01429	0.01407	0.01364	0.01608
										548.9	-84.0031	-25.7001	-11.468	5.34792	548.9	0.01432	0.01411	0.01367	0.01608
										548.8	-84.3605	-26.3493	-11.5374	5.279	548.8	0.01435	0.01413	0.01371	0.01609
										548.7	-84.8113	-27.1307	-11.401	5.40504	548.7	0.01443	0.01418	0.01378	0.0161
										548.6	-85.4025	-27.2605	-12.005	5.54403	548.6	0.01441	0.01419	0.01379	0.01612
										548.5	-86.4291	-26.8973	-11.3565	5.89513	548.5	0.01448	0.01421	0.01377	0.01617
										548.4	-87.1512	-26.8959	-11.4862	5.50803	548.4	0.01452	0.01425	0.01377	0.01621
										548.3	-87.6453	-27.0973	-11.4178	4.84002	548.3	0.01456	0.01433	0.01379	0.01623
										548.2	-87.8705	-26.9867	-11.6906	5.21108	548.2	0.01459	0.01435	0.0138	0.01627
										548.1	-87.8548	-27.3984	-11.4505	5.24973	548.1	0.01461	0.01438	0.01382	0.01631
										548	-88.631	-27.6879	-12.0044	5.10675	548	0.01463	0.01443	0.01384	0.01635
										547.9	-89.147	-27.5652	-12.8378	5.56616	547.9	0.01472	0.01447	0.0139	0.01639
										547.8	-90.0674	-28.355	-13.3365	5.68107	547.8	0.01476	0.0145	0.01393	0.01644
										547.7	-90.7884	-28.5901	-13.5063	5.83723	547.7	0.01483	0.01454	0.01393	0.01648
										547.6	-90.7624	-28.908	-13.9543	5.42393	547.6	0.01485	0.0146	0.01397	0.01654
										547.5	-91.4685	-29.5471	-14.073	4.3709	547.5	0.01488	0.01464	0.01402	0.01652
										547.4	-91.6318	-30.9559	-13.9134	4.88572	547.4	0.01493	0.01467	0.01409	0.01653
										547.3	-91.4083	-30.3971	-13.4788	4.67316	547.3	0.01497	0.01472	0.01411	0.01654
										547.2	-91.6183	-30.4629	-13.584	4.51098	547.2	0.015	0.01472	0.01408	0.01653
										547.1	-91.7018	-30.36	-13.7586	4.29561	547.1	0.01505	0.01477	0.0141	0.01662
										547	-92.3053	-30.2463	-14.0197	4.40547	547	0.0151	0.01481	0.01414	0.01667
										546.9	-92.8315	-31.1851	-13.8598	4.43994	546.9	0.01518	0.01483	0.01419	0.01671
										546.8	-93.4418	-31.5936	-13.5305	4.05742	546.8	0.01523	0.01486	0.01421	0.01677
										546.7	-93.405	-31.4353	-13.3931	3.7254	546.7	0.01525	0.01488	0.01425	0.01683
										546.6	-93.7875	-32.0607	-13.3568	3.82261	546.6	0.01524	0.0149	0.01431	0.01684
										546.5	-94.1801	-32.0339	-14.0718	3.38763	546.5	0.01525	0.01491	0.01433	0.01688
										546.4	-95.0755	-31.8242	-15.0014	3.56478	546.4	0.01524	0.01498	0.01437	0.01688
										546.3	-94.7362	-32.159	-15.1089	3.78859	546.3	0.01526	0.01503	0.01439	0.01689
										546.2	-95.4921	-33.0242	-15.0552	3.15728	546.2	0.0153	0.01506	0.01442	0.01692
										546.1	-96.2061	-33.1447	-14.7173	3.19783	546.1	0.01535	0.0151	0.01452	0.01696
										546	-96.157	-33.4479	-14.502	3.29366	546	0.01537	0.01514	0.01454	0.01701
										545.9	-96.4327	-33.7257	-15.1442	3.30323	545.9	0.01541	0.0152	0.01455	0.01702
										545.8	-97.2864	-33.8912	-14.9814	3.41417	545.8	0.01547	0.01524	0.01458	0.01706
										545.7	-98.552	-34.0367	-14.7019	3.6797	545.7	0.01553	0.01526	0.01461	0.01709
										545.6	-98.6562	-33.9554	-14.5528	3.77092	545.6	0.01555	0.01531	0.01464	0.01714
										545.5	-99.3375	-33.8074	-14.8167	3.53233	545.5	0.0156	0.01534	0.01466	0.01719
										545.4	-99.816	-33.7646	-14.7423	3.06396	545.4	0.01562	0.0154	0.01468	0.01727
										545.3	-99.3778	-33.8736	-14.7387	2.24583	545.3	0.01571	0.01545	0.01471	0.01733
										545.2	-99.2552	-34.1829	-15.4794	2.77552	545.2	0.01573	0.01548	0.01478	0.01735
										545.1	-99.466	-34.6218	-15.4049	3.54353	545.1	0.01578	0.01551	0.01482	0.01737
										545	-99.886	-35.1108	-15.5541	3.79323	545	0.01582	0.01552	0.01488	0.01743
										544.9	-100.203	-35.6376	-14.6408	3.36753	544.9	0.01584	0.01554	0.01493	0.01746
										544.8	-99.919	-35.8957	-14.3846	2.90347	544.8	0.01591	0.01559	0.01499	0.01751
										544.7	-99.928	-36.43	-13.8734	2.31987	544.7	0.01598	0.01567	0.01504	0.01756
										544.6	-100.5	-36.2707	-13.7206	1.60585	544.6	0.01601	0.01571	0.01508	0.01758
										544.5	-100.16	-35.8626	-13.6788	1.35036	544.5	0.01603	0.01574	0.01512	0.01761
										544.4	-100.546	-35.2391	-13.794	0.79246	544.4	0.01606	0.01577	0.01514	0.01761
										544.3	-100.901	-35.1341	-14.0008	1.13094	544.3	0.01611	0.01581	0.01518	0.01765
										544.2	-101.51	-35.6902	-14.8554	1.65108	544.2	0.01615	0.01585	0.0152	0.01771
										544.1	-102.323	-35.383	-15.0659	1.58157	544.1	0.01617	0.01587	0.01523	0.01774
										544	-102.686	-36.1281	-15.3107	1.5704	544	0.01626	0.01592	0.01531	0.01776
										543.9	-103.78	-36.2489	-15.1592	1.88639	543.9	0.01631	0.01597	0.01536	0.01781
										543.8	-103.905	-36.79	-14.3358	1.80474	543.8	0.01636	0.01597	0.01542	0.01784
										543.7	-104.319	-37.3758	-14.2093	1.62728	543.7	0.01641	0.01602	0.01547	0.01787
										543.6	-105.606	-37.1529	-14.4141	0.59864	543.6	0.01646	0.01608	0.01549	0.01791
										543.5	-106.2	-36.3216	-15.0669	0.20759	543.5	0.01647	0.01609	0.01554	0.01792
										543.4	-106.512	-36.2982	-15.6466	0.18793	543.4	0.01652	0.01614	0.01558	0.01795
										543.3	-106.865	-35.9584	-14.9723	-0.29224	543.3	0.01659	0.01619	0.01559	0.01803
										543.2	-107.49	-36.4882	-14.442	0.34672	543.2	0.01664	0.01624	0.01561	0.01805
										543.1	-107.796	-36.7111	-13.911	0.05589	543.1	0.01668	0.01624	0.01563	0.0181
										543	-108.71	-36.6356	-13.8913	0.4563	543	0.0167	0.01629	0.01566	0.01814
										542.9	-108.816	-36.319	-14.105	0.38844	542.9	0.01672	0.01632	0.01568	0.01825
										542.8	-109.592	-36.5752	-13.6744	0.87995	542.8	0.01671	0.01634	0.0157	0.01826
										542.7	-110.275	-36.3776	-13.9607	0.70489	542.7	0.01675	0.0164	0.01577	0.01832
										542.6	-110.567	-35.5563	-13.3115	0.38772	542.6	0.01682	0.01638	0.01581	0.01834
										542.5	-110.865	-35.1903	-12.9615	0.33679	542.5	0.01681	0.01642	0.01584	0.01836
										542.4	-111.365	-35.3846	-13.1479	0.25794	542.4	0.01688	0.01647	0.01587	0.01841
										542.3	-111.755	-35.0132	-13.6374	0.52388	542.3	0.01693	0.01647	0.0159	0.01844
										542.2	-112.44	-34.9306	-13.6814	1.02616	542.2	0.01694	0.01653	0.01593	0.01846
										542.1	-111.947	-35.4246	-14.5378	0.59726	542.1	0.01699	0.01657	0.01599	0.01848
										542	-112.373	-35.6632	-14.326	1.06605	542	0.01704	0.01662	0.01603	0.0185
										541.9	-112.305	-35.8211	-13.985	0.65406	541.9	0.01708	0.01669	0.01607	0.01855
										541.8	-112.879	-35.359	-14.0577	-0.50483	541.8	0.0171	0.01677	0.01613	0.01865
										541.7	-113.407	-35.2664	-14.0727	0.00799	541.7	0.01716	0.01685	0.01615	0.01867
										541.6	-114.184	-35.1675	-14.7224	1.03667	541.6	0.01722	0.01692	0.01618	0.01873
										541.5	-114.767	-35.0136	-14.968	0.88095	541.5	0.01726	0.01696	0.0162	0.01877
										541.4	-115.351	-34.1643	-15.2594	1.1941	541.4	0.01727	0.01699	0.01621	0.01879
										541.3	-116.076	-34.352	-15.9481	1.66882	541.3	0.01731	0.01703	0.01625	0.01879
										541.2	-116.157	-34.0909	-15.9956	1.48243	541.2	0.01739	0.01707	0.01623	0.01884
										541.1	-116.574	-34.2206	-15.8873	1.70173	541.1	0.01744	0.01713	0.01626	0.01884
										541	-116.613	-33.9572	-15.949	1.23331	541	0.01747	0.01715	0.01631	0.0189
										540.9	-116.423	-34.1318	-15.7399	1.05027	540.9	0.01752	0.01718	0.01637	0.01896
										540.8	-116.367	-34.4371	-15.2472	-0.22461	540.8	0.01754	0.01722	0.01645	0.01902
										540.7	-116.657	-34.6636	-15.0622	0.31052	540.7	0.01758	0.01727	0.01648	0.01908
										540.6	-116.614	-34.1216	-15.1006	-0.17797	540.6	0.01759	0.01729	0.01652	0.01913
										540.5	-116.463	-34.3312	-15.311	0.22093	540.5	0.01763	0.01731	0.01655	0.01917
										540.4	-116.559	-34.4553	-15.8631	0.94254	540.4	0.01764	0.01734	0.01661	0.0192
										540.3	-117.407	-34.8228	-16.2814	1.94451	540.3	0.01769	0.0174	0.01667	0.01924
										540.2	-117.478	-35.232	-16.7272	2.76802	540.2	0.01776	0.01742	0.01672	0.01929
										540.1	-118.286	-35.5582	-16.5789	2.99019	540.1	0.01779	0.01749	0.01674	0.0193
										540	-118.737	-36.4421	-16.4298	2.85107	540	0.01785	0.01753	0.01678	0.01932
										539.9	-119.517	-36.4808	-16.7001	2.81045	539.9	0.01789	0.01756	0.01684	0.01935
										539.8	-119.974	-36.319	-16.8663	2.31726	539.8	0.01797	0.01762	0.01691	0.01937
										539.7	-120.468	-36.5441	-16.8443	2.24386	539.7	0.01802	0.01769	0.01698	0.01939
										539.6	-120.564	-36.334	-16.5689	1.27531	539.6	0.01805	0.01772	0.01701	0.01939
										539.5	-121.193	-36.3196	-16.8416	1.27122	539.5	0.01808	0.01778	0.01709	0.01942
										539.4	-121.817	-35.9806	-16.8309	-0.04392	539.4	0.01817	0.01783	0.01712	0.01943
										539.3	-122.18	-36.2664	-16.7987	-0.33055	539.3	0.01822	0.01788	0.01712	0.01946
										539.2	-122.6	-37.7314	-16.5657	-0.26568	539.2	0.01827	0.01794	0.01717	0.01951
										539.1	-122.786	-37.9588	-16.7248	-0.29283	539.1	0.01831	0.01798	0.01718	0.01953
										539	-123.172	-37.5287	-16.9008	0.14444	539	0.01833	0.01801	0.01723	0.01956
										538.9	-124.679	-38.3056	-16.535	-0.75555	538.9	0.01837	0.01807	0.01728	0.01962
										538.8	-124.631	-37.8948	-16.3309	-0.50128	538.8	0.01841	0.01811	0.01727	0.01972
										538.7	-124.745	-38.0695	-16.1241	0.00887	538.7	0.01843	0.01818	0.01732	0.01975
										538.6	-125.304	-37.8409	-16.277	-0.11938	538.6	0.01845	0.0182	0.01735	0.01979
										538.5	-125.618	-38.2113	-16.3009	0.8198	538.5	0.01848	0.01824	0.01739	0.01983
										538.4	-126.558	-38.2465	-16.8715	0.43512	538.4	0.01851	0.01825	0.0174	0.01989
										538.3	-127.638	-38.4885	-16.9575	0.22277	538.3	0.01858	0.01826	0.01746	0.01992
										538.2	-127.852	-38.5446	-16.6724	0.059	538.2	0.01862	0.01831	0.01751	0.01998
										538.1	-128.348	-39.5887	-16.8645	-0.341	538.1	0.01866	0.01835	0.01755	0.02003
										538	-128.246	-40.079	-17.3408	-0.31567	538	0.0187	0.01839	0.0176	0.0201
										537.9	-128.192	-40.4565	-16.9531	-0.15191	537.9	0.01873	0.01844	0.01765	0.02017
										537.8	-129.127	-40.3513	-17.116	-0.32948	537.8	0.01875	0.01849	0.01772	0.0202
										537.7	-130.221	-40.8647	-16.4399	-0.22619	537.7	0.01878	0.01852	0.01774	0.02026
										537.6	-131.232	-40.8994	-16.5679	-0.09408	537.6	0.01882	0.01858	0.01777	0.02031
										537.5	-131.969	-40.9923	-16.7128	-0.98786	537.5	0.01887	0.01862	0.0178	0.02032
										537.4	-132.494	-40.588	-16.7428	0.22539	537.4	0.01896	0.01868	0.01784	0.02034
										537.3	-132.712	-40.4424	-16.733	-0.00439	537.3	0.019	0.01872	0.01786	0.02039
										537.2	-133.357	-40.9679	-16.9397	0.12969	537.2	0.01909	0.01881	0.0179	0.02046
										537.1	-134.474	-41.1508	-17.3464	-0.49516	537.1	0.01914	0.01885	0.01794	0.02051
										537	-134.513	-40.6513	-17.5349	-0.65373	537	0.01917	0.01893	0.01796	0.02056
										536.9	-134.91	-40.8209	-17.7597	-1.50948	536.9	0.0192	0.01895	0.01797	0.02061
										536.8	-134.703	-40.5194	-17.1592	-2.07931	536.8	0.01924	0.01903	0.01801	0.02069
										536.7	-134.535	-41.3165	-17.1505	-1.653	536.7	0.0193	0.01906	0.01806	0.02077
										536.6	-135.26	-40.3111	-17.3715	-1.03359	536.6	0.01935	0.01907	0.0181	0.02083
										536.5	-136.254	-41.2263	-17.0914	-1.56269	536.5	0.0194	0.01914	0.0181	0.02091
										536.4	-136.289	-40.7162	-17.8413	-1.28572	536.4	0.0194	0.01913	0.01811	0.02101
										536.3	-136.295	-40.8096	-17.9386	-0.92896	536.3	0.01943	0.0192	0.01815	0.02104
										536.2	-136.664	-40.4448	-17.468	-0.60877	536.2	0.01951	0.01921	0.01817	0.02109
										536.1	-137.305	-41.0653	-18.0612	-0.62803	536.1	0.01957	0.01924	0.01821	0.02115
										536	-136.926	-41.4648	-17.7299	-0.37001	536	0.01959	0.01926	0.01826	0.02121
										535.9	-137.094	-41.8857	-17.7714	0.70994	535.9	0.01963	0.01928	0.01832	0.02125
										535.8	-137.915	-41.1658	-17.8379	0.41221	535.8	0.01968	0.01938	0.01838	0.0213
										535.7	-138.073	-41.9746	-17.2609	-0.20679	535.7	0.01972	0.01941	0.01847	0.02134
										535.6	-137.954	-42.3275	-17.3418	-0.1721	535.6	0.01977	0.01945	0.01845	0.02139
										535.5	-138.23	-43.002	-17.6509	-1.32772	535.5	0.01983	0.01949	0.01848	0.02142
										535.4	-139.4	-42.6806	-17.5056	-1.49615	535.4	0.0199	0.01952	0.01855	0.02144
										535.3	-140.488	-42.8373	-17.2051	-1.74175	535.3	0.01995	0.01956	0.01858	0.0215
										535.2	-140.983	-42.326	-17.3516	-2.3114	535.2	0.02001	0.0196	0.01861	0.0215
										535.1	-140.942	-42.9009	-17.4784	-3.24102	535.1	0.02006	0.01963	0.01867	0.02151
										535	-141.314	-43.1055	-17.5285	-3.4996	535	0.02009	0.01966	0.01875	0.02155
										534.9	-141.689	-43.5978	-17.2499	-3.03289	534.9	0.02011	0.01973	0.01883	0.02161
										534.8	-142.325	-42.9646	-18.2136	-3.25343	534.8	0.02016	0.01981	0.01889	0.02168
										534.7	-142.892	-42.8986	-18.0405	-2.92978	534.7	0.02025	0.01985	0.01894	0.02173
										534.6	-143.104	-42.4397	-18.1311	-2.2661	534.6	0.02028	0.01991	0.01899	0.02178
										534.5	-143.841	-43.3628	-18.1454	-2.44806	534.5	0.02034	0.01997	0.019	0.02183
										534.4	-143.347	-44.2638	-18.3811	-1.67806	534.4	0.02043	0.02	0.01907	0.02191
										534.3	-143.048	-44.6446	-19.1626	-0.5316	534.3	0.02047	0.02005	0.01909	0.02195
										534.2	-143.722	-44.4446	-19.3411	0.0952	534.2	0.02055	0.02007	0.01914	0.02203
										534.1	-144.527	-45.2357	-19.7541	-0.38341	534.1	0.02059	0.02013	0.01918	0.02206
										534	-145.229	-45.5605	-20.0097	-1.04978	534	0.02064	0.0202	0.01923	0.0221
										533.9	-146.494	-45.4974	-19.8608	-1.48029	533.9	0.0207	0.02024	0.01929	0.02215
										533.8	-147.246	-45.9033	-20.0595	-1.19458	533.8	0.02073	0.02033	0.01937	0.02218
										533.7	-147.583	-46.6224	-19.8651	-0.67983	533.7	0.02083	0.02033	0.01946	0.02223
										533.6	-147.921	-46.5033	-19.3801	-0.18094	533.6	0.02088	0.02042	0.01952	0.02232
										533.5	-148.397	-47.3993	-19.3434	-0.34363	533.5	0.02096	0.02045	0.01955	0.02233
										533.4	-149.834	-47.4562	-19.0938	-0.59305	533.4	0.02103	0.02054	0.01958	0.02234
										533.3	-150.074	-48.2514	-19.3785	-0.69339	533.3	0.02109	0.02058	0.01962	0.02237
										533.2	-150.393	-48.9175	-19.7827	0.16318	533.2	0.02118	0.02067	0.01968	0.02245
										533.1	-151.235	-48.9513	-19.5352	0.05496	533.1	0.02124	0.02075	0.01975	0.02249
										533	-151.77	-48.5875	-20.1442	0.4069	533	0.02129	0.02079	0.01982	0.02255
										532.9	-151.69	-49.161	-20.6713	0.90536	532.9	0.02135	0.02086	0.01989	0.02259
										532.8	-152.231	-49.6127	-21.4275	1.61213	532.8	0.02138	0.02091	0.01997	0.02264
										532.7	-152.947	-49.2434	-22.2107	1.93533	532.7	0.0215	0.021	0.02002	0.0227
										532.6	-153.328	-49.2795	-22.6257	1.91379	532.6	0.02157	0.02107	0.02009	0.02277
										532.5	-154.003	-50.3063	-22.865	1.53673	532.5	0.02163	0.02112	0.02011	0.02285
										532.4	-154.541	-50.4649	-23.9128	2.38129	532.4	0.0217	0.02115	0.02016	0.02291
										532.3	-155.536	-50.7354	-22.8434	2.62071	532.3	0.02174	0.02121	0.02026	0.02299
										532.2	-156.317	-50.9636	-23.034	2.88057	532.2	0.02179	0.02128	0.02033	0.02307
										532.1	-156.648	-51.7421	-23.4784	3.4671	532.1	0.02184	0.02133	0.02035	0.02313
										532	-157.518	-52.0656	-23.5798	3.48928	532	0.0219	0.02139	0.02042	0.02319
										531.9	-158.648	-52.2558	-22.589	3.6579	531.9	0.02195	0.02144	0.02049	0.02325
										531.8	-159.088	-52.2256	-22.2077	4.01535	531.8	0.02203	0.02151	0.02052	0.02328
										531.7	-158.212	-53.05	-22.9126	3.64573	531.7	0.0221	0.02158	0.02055	0.02332
										531.6	-159.558	-52.8966	-22.3948	2.94422	531.6	0.02214	0.02161	0.02058	0.02337
										531.5	-160.504	-53.6884	-23.0619	2.6633	531.5	0.02221	0.02163	0.02061	0.02343
										531.4	-160.676	-54.2292	-22.3451	1.61519	531.4	0.02222	0.02171	0.02067	0.02348
										531.3	-160.525	-53.9259	-22.1935	2.12551	531.3	0.02231	0.02175	0.02077	0.02356
										531.2	-161.401	-53.8429	-22.7645	3.15582	531.2	0.02243	0.02182	0.02085	0.0236
										531.1	-162.334	-54.0801	-21.9274	3.5289	531.1	0.02245	0.02189	0.02093	0.02367
										531	-162.792	-54.593	-21.4273	2.6201	531	0.02249	0.02198	0.02095	0.02373
										530.9	-162.65	-54.8066	-21.4224	2.25604	530.9	0.02253	0.02202	0.02103	0.0238
										530.8	-163.475	-54.8423	-21.28	2.62287	530.8	0.02255	0.02206	0.02113	0.02384
										530.7	-163.481	-55.323	-22.0649	2.92618	530.7	0.02259	0.02209	0.02114	0.02389
										530.6	-162.762	-55.5459	-21.744	3.4824	530.6	0.02262	0.02217	0.02118	0.02394
										530.5	-163.636	-54.6749	-21.5427	3.33919	530.5	0.02268	0.02219	0.02119	0.02398
										530.4	-164.312	-54.3602	-21.949	2.77877	530.4	0.02275	0.02224	0.02122	0.02401
										530.3	-164.831	-53.4545	-22.0661	2.75553	530.3	0.02276	0.02228	0.02129	0.02408
										530.2	-164.949	-53.6035	-22.4284	1.76234	530.2	0.0228	0.02233	0.02134	0.02417
										530.1	-166.407	-53.8902	-22.2055	2.15891	530.1	0.02284	0.02237	0.02142	0.02424
										530	-166.826	-53.6899	-21.7907	3.12797	530	0.02288	0.02243	0.02147	0.0243
										529.9	-167.595	-54.1571	-22.08	2.92634	529.9	0.0229	0.0225	0.02152	0.0244
										529.8	-169.226	-54.2815	-22.4644	2.64255	529.8	0.023	0.02258	0.02157	0.02449
										529.7	-170.122	-54.8218	-22.8861	2.74053	529.7	0.02306	0.02266	0.02158	0.02459
										529.6	-170.112	-54.9398	-22.1143	2.63429	529.6	0.02308	0.02273	0.02162	0.02466
										529.5	-170.917	-55.5896	-21.7121	1.30726	529.5	0.02308	0.02279	0.02164	0.02471
										529.4	-170.805	-55.4576	-21.7655	1.40385	529.4	0.02311	0.02281	0.02172	0.02476
										529.3	-172.052	-54.8155	-21.3515	2.27994	529.3	0.02317	0.02282	0.02178	0.02481
										529.2	-172.098	-54.7485	-20.6428	2.43958	529.2	0.02321	0.02289	0.02179	0.02487
										529.1	-172.702	-54.4912	-20.8072	2.493	529.1	0.02325	0.02295	0.02182	0.02494
										529	-172.82	-54.098	-21.9372	2.88775	529	0.0233	0.02304	0.02188	0.025
										528.9	-174.148	-54.9665	-22.7002	3.58939	528.9	0.02338	0.02307	0.02193	0.02507
										528.8	-175.466	-55.0137	-22.2342	4.02201	528.8	0.02349	0.02316	0.02199	0.02512
										528.7	-175.331	-55.1715	-22.2167	3.93793	528.7	0.02356	0.02322	0.02203	0.0252
										528.6	-175.977	-55.4915	-23.3767	3.86892	528.6	0.02359	0.02328	0.02205	0.02525
										528.5	-177.437	-55.3155	-23.0342	4.87767	528.5	0.02363	0.02331	0.02207	0.02533
										528.4	-178.178	-55.3891	-23.4501	5.1204	528.4	0.02372	0.02335	0.02215	0.02542
										528.3	-178.938	-55.8288	-23.2127	5.69006	528.3	0.02378	0.02343	0.0222	0.02545
										528.2	-179.941	-55.5381	-23.9955	5.83093	528.2	0.02388	0.02352	0.02223	0.0255
										528.1	-180.838	-55.8349	-24.63	6.78255	528.1	0.02397	0.02353	0.02228	0.02558
										528	-180.702	-56.8321	-24.243	5.99902	528	0.02397	0.0236	0.02233	0.02562
										527.9	-181.834	-56.7741	-24.3488	5.53105	527.9	0.02404	0.02363	0.02237	0.02568
										527.8	-182.763	-57.6657	-25.2794	5.43532	527.8	0.02411	0.0237	0.02248	0.02574
										527.7	-184.229	-57.4076	-24.8929	5.26905	527.7	0.02417	0.02374	0.02254	0.02577
										527.6	-185.25	-57.44	-24.921	4.83901	527.6	0.02427	0.02379	0.02259	0.02586
										527.5	-186.081	-57.7076	-24.7195	4.77736	527.5	0.02428	0.02386	0.02269	0.02597
										527.4	-187.594	-57.006	-24.2262	5.00184	527.4	0.02438	0.02392	0.02273	0.02603
										527.3	-188.172	-58.3271	-24.2474	4.194	527.3	0.02447	0.02403	0.02283	0.02613
										527.2	-188.779	-58.7129	-23.7349	4.24498	527.2	0.02452	0.02412	0.02288	0.0262
										527.1	-189.052	-58.9296	-22.8815	3.94818	527.1	0.02455	0.02418	0.02293	0.02626
										527	-189.426	-59.1637	-23.3463	4.3557	527	0.02459	0.02422	0.023	0.02631
										526.9	-190.53	-59.2011	-23.5708	5.18045	526.9	0.02465	0.02431	0.02305	0.02637
										526.8	-191.53	-59.6609	-23.6881	3.67196	526.8	0.02469	0.02438	0.02309	0.02642
										526.7	-191.698	-59.5463	-23.485	3.42858	526.7	0.02477	0.02447	0.02316	0.02648
										526.6	-191.855	-60.7479	-23.6524	3.01975	526.6	0.02487	0.02453	0.02325	0.02651
										526.5	-192.664	-60.2485	-22.953	3.35748	526.5	0.02498	0.02465	0.02337	0.02658
										526.4	-192.501	-60.0381	-21.8062	3.44662	526.4	0.02504	0.02472	0.02345	0.02665
										526.3	-193.518	-60.0487	-21.9358	4.37769	526.3	0.02514	0.02477	0.0235	0.02671
										526.2	-195.233	-60.6564	-21.8987	4.08579	526.2	0.02523	0.02483	0.02354	0.02677
										526.1	-195.91	-60.7791	-21.4771	2.53734	526.1	0.0253	0.02494	0.02359	0.02686
										526	-196.456	-62.2907	-22.2763	0.91051	526	0.02539	0.02502	0.02363	0.02693
										525.9	-198.399	-62.6379	-22.2953	0.63312	525.9	0.02544	0.02509	0.02369	0.02696
										525.8	-198.436	-63.3633	-22.7058	1.00007	525.8	0.02552	0.02516	0.02377	0.02706
										525.7	-198.669	-63.6909	-22.3138	0.50209	525.7	0.02558	0.02519	0.02381	0.02713
										525.6	-199.437	-63.789	-22.4368	-0.62026	525.6	0.02565	0.02526	0.02389	0.02718
										525.5	-200.066	-63.9516	-23.3938	-0.98103	525.5	0.02569	0.02532	0.02396	0.02729
										525.4	-200.683	-64.1681	-24.1007	-0.99108	525.4	0.02575	0.02541	0.02405	0.02736
										525.3	-202.152	-64.0207	-24.6251	-0.427	525.3	0.02582	0.02548	0.02414	0.02745
										525.2	-202.043	-64.9695	-24.6057	-1.17004	525.2	0.0259	0.02555	0.0242	0.02752
										525.1	-202.318	-64.1049	-23.7155	-0.40898	525.1	0.02599	0.02566	0.02421	0.02757
										525	-202.862	-64.3079	-23.4729	-1.3203	525	0.02604	0.0257	0.02426	0.02765
										524.9	-203.33	-64.7697	-23.4552	-0.7736	524.9	0.0261	0.02578	0.02435	0.0277
										524.8	-204.555	-64.6722	-23.3575	-1.43934	524.8	0.02615	0.02585	0.02443	0.02779
										524.7	-206.579	-64.6707	-24.3264	-1.45817	524.7	0.02622	0.02592	0.02452	0.02785
										524.6	-207.048	-65.5173	-24.4442	-1.56535	524.6	0.0263	0.02601	0.02454	0.02791
										524.5	-207.773	-65.0764	-24.2358	-0.93602	524.5	0.02641	0.02608	0.0246	0.02798
										524.4	-209.014	-65.0931	-25.3733	-1.41334	524.4	0.0265	0.02616	0.02467	0.02805
										524.3	-209.584	-65.6032	-25.4646	-1.02139	524.3	0.02655	0.02621	0.02468	0.02813
										524.2	-210.298	-65.5073	-25.999	-0.84545	524.2	0.02668	0.02632	0.02472	0.02819
										524.1	-210.719	-65.4157	-26.908	0.40225	524.1	0.02677	0.02632	0.02477	0.02823
										524	-211.747	-66.0357	-27.1439	0.25333	524	0.02684	0.02634	0.02485	0.02831
										523.9	-212.72	-66.9326	-27.5335	0.20255	523.9	0.02691	0.02644	0.02495	0.02838
										523.8	-214.137	-68.4248	-28.1103	-0.38706	523.8	0.02705	0.02648	0.02507	0.02845
										523.7	-214.596	-68.7971	-27.9645	0.20403	523.7	0.02718	0.02659	0.02515	0.02852
										523.6	-214.577	-69.2636	-28.3302	0.6034	523.6	0.02725	0.02666	0.02525	0.0286
										523.5	-215.834	-70.2743	-28.9449	0.12812	523.5	0.02733	0.02671	0.02533	0.02871
										523.4	-216.65	-70.6073	-29.4328	-0.51465	523.4	0.02743	0.02677	0.02539	0.02874
										523.3	-217.349	-69.9919	-29.3725	-0.44936	523.3	0.02751	0.02682	0.02544	0.02883
										523.2	-217.806	-70.9452	-29.5428	-0.78777	523.2	0.0276	0.02686	0.02544	0.02888
										523.1	-219.187	-71.379	-30.2862	-1.14757	523.1	0.0277	0.02692	0.02549	0.02894
										523	-218.926	-70.8612	-30.0239	-0.738	523	0.02773	0.02699	0.02554	0.02902
										522.9	-219.161	-70.899	-30.7117	-0.95464	522.9	0.02784	0.02708	0.02562	0.02911
										522.8	-220.252	-70.579	-31.2547	0.32284	522.8	0.02791	0.02713	0.02568	0.02917
										522.7	-220.885	-69.4178	-30.883	0.81439	522.7	0.02798	0.02724	0.02576	0.02925
										522.6	-221.327	-69.6157	-31.8272	0.62975	522.6	0.02812	0.02732	0.02588	0.02936
										522.5	-222.941	-69.4966	-32.5669	0.14806	522.5	0.02821	0.02739	0.02595	0.02938
										522.4	-223.753	-68.4865	-32.9106	0.54783	522.4	0.02833	0.02749	0.02601	0.02945
										522.3	-224.646	-68.3748	-33.1303	1.08458	522.3	0.02837	0.02752	0.02608	0.0295
										522.2	-225.464	-69.494	-32.9149	1.34231	522.2	0.02848	0.02762	0.02616	0.02955
										522.1	-225.6	-70.5104	-32.5562	1.58256	522.1	0.02855	0.02767	0.02626	0.02964
										522	-226.608	-71.1048	-31.7428	1.57095	522	0.02867	0.02774	0.0263	0.02971
										521.9	-227.925	-70.7095	-32.3992	1.1808	521.9	0.02873	0.0278	0.02641	0.0298
										521.8	-229.206	-72.461	-32.8874	0.71111	521.8	0.02881	0.02785	0.02648	0.02991
										521.7	-229.842	-73.9652	-33.2192	0.77465	521.7	0.02889	0.02795	0.02655	0.02997
										521.6	-231.695	-74.6043	-33.3013	0.95478	521.6	0.02896	0.02803	0.02661	0.03005
										521.5	-232.201	-74.3079	-33.8264	1.55096	521.5	0.02905	0.02812	0.02664	0.03011
										521.4	-232.663	-74.465	-33.4782	0.78652	521.4	0.02916	0.0282	0.02667	0.03024
										521.3	-234.318	-74.5651	-34.0406	0.31853	521.3	0.02926	0.02828	0.02675	0.03032
										521.2	-234.94	-75.3284	-33.4882	-0.33057	521.2	0.02934	0.02837	0.0268	0.03042
										521.1	-236.003	-76.1778	-33.0451	0.15668	521.1	0.02941	0.02846	0.0269	0.03054
										521	-236.296	-76.2518	-33.458	0.51664	521	0.02954	0.0286	0.02696	0.03062
										520.9	-237.439	-76.0635	-33.6593	0.1852	520.9	0.02963	0.02868	0.02704	0.0307
										520.8	-238.719	-76.8718	-33.1589	-0.05393	520.8	0.02973	0.02874	0.02712	0.03083
										520.7	-239.348	-76.3142	-33.0647	-0.14979	520.7	0.02978	0.02884	0.0272	0.03091
										520.6	-240.279	-76.2643	-33.5552	-0.41693	520.6	0.02984	0.0289	0.02727	0.03098
										520.5	-240.827	-76.445	-33.7049	1.02807	520.5	0.02988	0.02899	0.02728	0.03107
										520.4	-241.193	-76.8017	-34.4305	2.25916	520.4	0.02996	0.02904	0.02736	0.03114
										520.3	-241.99	-77.1125	-34.572	1.35565	520.3	0.03002	0.02913	0.02744	0.03127
										520.2	-241.847	-76.4282	-33.8188	1.07216	520.2	0.03012	0.02922	0.02752	0.03134
										520.1	-242.452	-76.537	-33.932	1.26233	520.1	0.03021	0.02933	0.02756	0.03144
										520	-242.921	-77.0962	-33.7954	0.82259	520	0.0303	0.0294	0.02765	0.03151
										519.9	-243.859	-77.6293	-33.8791	0.34197	519.9	0.03041	0.02949	0.02776	0.03157
										519.8	-245.637	-78.3567	-34.559	0.57581	519.8	0.03051	0.0296	0.02786	0.03168
										519.7	-246.976	-79.0712	-34.8943	0.61298	519.7	0.03061	0.02969	0.02793	0.03181
										519.6	-247.979	-80.5768	-34.7702	0.60357	519.6	0.03071	0.02978	0.02799	0.0319
										519.5	-249.053	-80.9143	-34.8383	0.61223	519.5	0.03081	0.02985	0.02806	0.03197
										519.4	-249.567	-81.6026	-34.9933	0.73309	519.4	0.03089	0.02994	0.02815	0.03204
										519.3	-250.916	-82.4394	-34.5226	1.47804	519.3	0.03092	0.03003	0.02818	0.03211
										519.2	-250.708	-83.2395	-34.2576	1.99599	519.2	0.031	0.03007	0.02824	0.03223
										519.1	-250.825	-83.9052	-34.9953	1.10726	519.1	0.03105	0.03018	0.02831	0.03232
										519	-251.647	-84.6013	-35.4229	1.60379	519	0.03115	0.03031	0.02838	0.03239
										518.9	-252.614	-84.6228	-36.0759	1.2522	518.9	0.03122	0.03039	0.02847	0.03248
										518.8	-253.468	-84.941	-36.2266	0.54396	518.8	0.03133	0.03045	0.02851	0.03258
										518.7	-253.856	-84.4285	-36.3344	0.39079	518.7	0.03141	0.03057	0.02859	0.03265
										518.6	-255.403	-85.455	-36.4401	-0.28145	518.6	0.03147	0.03066	0.02868	0.03274
										518.5	-256.293	-84.9862	-36.9981	0.40392	518.5	0.03159	0.03076	0.02874	0.03281
										518.4	-257.738	-84.5741	-36.5169	0.41441	518.4	0.03169	0.03082	0.02885	0.03291
										518.3	-258.366	-84.8917	-35.4911	0.66815	518.3	0.03182	0.03085	0.02895	0.03306
										518.2	-258.473	-84.7867	-35.5133	-0.36417	518.2	0.0319	0.03092	0.02906	0.03317
										518.1	-259.774	-85.2678	-35.8425	-1.76242	518.1	0.03197	0.03101	0.02916	0.03325
										518	-260.422	-84.8143	-35.939	-1.12484	518	0.03201	0.0311	0.02926	0.03335
										517.9	-261.659	-85.3058	-36.2498	0.21651	517.9	0.03213	0.03119	0.02935	0.03346
										517.8	-262.624	-84.9494	-36.8329	-0.51482	517.8	0.0322	0.03128	0.02941	0.03353
										517.7	-264.368	-86.7055	-36.9684	-0.62785	517.7	0.03228	0.03133	0.02951	0.03358
										517.6	-265.749	-87.1992	-37.6139	-1.13755	517.6	0.03237	0.03141	0.02964	0.03365
										517.5	-267.654	-87.8766	-37.878	-1.77664	517.5	0.03245	0.03155	0.02973	0.03373
										517.4	-268.519	-89.0724	-37.2476	-1.37714	517.4	0.03255	0.03165	0.02983	0.03382
										517.3	-270.308	-89.0147	-36.6688	-1.02198	517.3	0.03265	0.03177	0.02994	0.03386
										517.2	-271.231	-88.9631	-35.9218	-1.92887	517.2	0.03277	0.03187	0.03006	0.03396
										517.1	-272.348	-90.3574	-35.539	-2.38132	517.1	0.03291	0.03198	0.03012	0.03401
										517	-273.665	-91.1338	-35.5836	-2.52864	517	0.03304	0.03207	0.0302	0.03406
										516.9	-274.593	-92.6329	-35.9048	-1.13032	516.9	0.03312	0.03217	0.03025	0.03416
										516.8	-276.282	-92.9896	-37.1417	0.02811	516.8	0.0332	0.03226	0.03035	0.03426
										516.7	-278.041	-93.5071	-37.7198	0.78851	516.7	0.03325	0.03238	0.03043	0.03435
										516.6	-278.747	-94.0209	-37.7961	1.21008	516.6	0.03331	0.03246	0.03051	0.03448
										516.5	-279.266	-94.1679	-36.8794	0.68981	516.5	0.0334	0.03252	0.03059	0.03455
										516.4	-280.778	-94.1942	-37.217	0.49168	516.4	0.03353	0.0326	0.03065	0.03466
										516.3	-281.719	-94.0374	-37.5084	-0.19304	516.3	0.03359	0.03264	0.03077	0.03475
										516.2	-281.893	-93.5727	-37.826	-0.6755	516.2	0.03368	0.03275	0.03087	0.03485
										516.1	-282.896	-94.4926	-38.0622	0.30397	516.1	0.03378	0.03284	0.03098	0.03497
										516	-283.415	-94.1819	-38.6741	0.21631	516	0.03394	0.03291	0.0311	0.03508
										515.9	-285.721	-94.3476	-39.2904	-0.29045	515.9	0.03406	0.03302	0.03119	0.03516
										515.8	-287.539	-94.8005	-38.1548	-1.39537	515.8	0.03421	0.0331	0.03132	0.03525
										515.7	-288.52	-95.7549	-37.2098	0.01967	515.7	0.03428	0.0332	0.03141	0.03538
										515.6	-290.051	-94.9759	-37.3705	-0.63199	515.6	0.0344	0.03333	0.03149	0.03548
										515.5	-291.787	-95.5924	-36.117	-1.39198	515.5	0.03446	0.03343	0.0316	0.03556
										515.4	-293.557	-95.9588	-36.5345	-2.0054	515.4	0.03456	0.03351	0.03171	0.03566
										515.3	-294.953	-96.8416	-36.9009	-1.80029	515.3	0.0347	0.0336	0.03179	0.03575
										515.2	-296.096	-97.8493	-37.3674	-0.56283	515.2	0.03481	0.03367	0.03185	0.03583
										515.1	-296.702	-98.836	-36.756	0.29393	515.1	0.0349	0.03378	0.03195	0.03595
										515	-297.337	-98.1498	-38.0823	0.21434	515	0.03501	0.03389	0.03203	0.03603
										514.9	-299.238	-98.5651	-37.448	0.27913	514.9	0.03512	0.03402	0.0321	0.03609
										514.8	-300.178	-98.9232	-38.2231	1.07342	514.8	0.03523	0.03415	0.03217	0.03619
										514.7	-300.702	-100.425	-38.5662	1.14779	514.7	0.03536	0.03426	0.0323	0.03626
										514.6	-302.001	-100.017	-39.4204	1.10265	514.6	0.03545	0.03436	0.03237	0.03635
										514.5	-303.297	-101.605	-39.1276	0.84752	514.5	0.03558	0.03447	0.03252	0.03647
										514.4	-303.161	-102.171	-38.4055	1.54401	514.4	0.03568	0.03459	0.03264	0.03657
										514.3	-303.19	-103.401	-37.996	1.01595	514.3	0.03578	0.0347	0.03274	0.03669
										514.2	-304.021	-103.789	-37.4796	2.49387	514.2	0.0359	0.03479	0.03281	0.03678
										514.1	-304.377	-103.822	-37.8847	1.80041	514.1	0.03599	0.03487	0.0329	0.03682
										514	-305.107	-104.505	-37.9143	1.21155	514	0.0361	0.03496	0.03295	0.0369
										513.9	-306.413	-104.014	-39.0202	2.00168	513.9	0.03622	0.03502	0.03303	0.03701
										513.8	-308.358	-102.796	-39.9141	1.64883	513.8	0.03629	0.03513	0.03311	0.03708
										513.7	-309.613	-103.437	-39.7725	1.58144	513.7	0.03636	0.03524	0.03315	0.0372
										513.6	-310.882	-103.549	-39.9602	1.36449	513.6	0.03639	0.03532	0.03323	0.0373
										513.5	-312.722	-102.099	-39.5262	0.43477	513.5	0.0365	0.03541	0.03336	0.03743
										513.4	-314.159	-102.446	-38.401	-0.22994	513.4	0.03662	0.03555	0.03345	0.03753
										513.3	-315.999	-102.287	-39.1318	-1.76218	513.3	0.03674	0.03565	0.03358	0.03761
										513.2	-317.28	-103.675	-40.6867	-2.2827	513.2	0.03684	0.03573	0.03364	0.03771
										513.1	-319.143	-104.201	-40.5639	-1.35187	513.1	0.03693	0.03584	0.03377	0.03779
										513	-320.357	-104.863	-40.9746	-2.70066	513	0.03704	0.03597	0.0339	0.03787
										512.9	-322.445	-104.759	-40.344	-2.52489	512.9	0.03715	0.03606	0.034	0.03795
										512.8	-323.705	-105.498	-40.1626	-2.25887	512.8	0.03726	0.03617	0.0341	0.03802
										512.7	-325.325	-106.395	-40.7607	-2.42996	512.7	0.03738	0.03628	0.03417	0.03808
										512.6	-326.358	-107.487	-41.2268	-2.05836	512.6	0.03747	0.0364	0.03428	0.03816
										512.5	-326.991	-107.952	-41.7406	-2.20398	512.5	0.03758	0.03651	0.0344	0.03826
										512.4	-328.458	-107.837	-41.3117	-2.28958	512.4	0.03768	0.0366	0.03448	0.03839
										512.3	-329.664	-108.838	-40.5125	-2.32877	512.3	0.03782	0.03673	0.03459	0.0385
										512.2	-330.078	-110.065	-41.1182	-0.85874	512.2	0.03793	0.03685	0.03466	0.03863
										512.1	-331.031	-108.782	-41.2697	-0.28908	512.1	0.03804	0.03695	0.03474	0.03877
										512	-331.534	-107.96	-41.4917	-0.44466	512	0.03815	0.03706	0.03479	0.03888
										511.9	-332.178	-108.205	-41.7654	0.15117	511.9	0.03824	0.0372	0.0349	0.039
										511.8	-333.554	-108.071	-42.1878	-0.19929	511.8	0.03837	0.03728	0.03503	0.03908
										511.7	-334.214	-107.938	-42.9202	-0.97764	511.7	0.03848	0.03741	0.03514	0.03919
										511.6	-335.483	-109.288	-42.8696	-1.24139	511.6	0.03862	0.03752	0.03525	0.03929
										511.5	-337.525	-110.085	-42.6887	-0.02835	511.5	0.03873	0.03762	0.03539	0.03941
										511.4	-337.546	-109.862	-41.5804	0.02654	511.4	0.03883	0.03774	0.03551	0.03953
										511.3	-338.129	-110.666	-41.0254	1.29961	511.3	0.03894	0.03786	0.03562	0.03966
										511.2	-339.43	-111.794	-41.0357	0.82113	511.2	0.03903	0.03799	0.03569	0.03976
										511.1	-341.307	-112.567	-41.4218	1.3133	511.1	0.03915	0.03813	0.03575	0.03984
										511	-342.848	-111.673	-42.2078	0.80444	511	0.03926	0.0382	0.0358	0.03996
										510.9	-343.692	-110.781	-42.7522	0.38853	510.9	0.03934	0.03831	0.03591	0.04011
										510.8	-345.388	-112.236	-44.039	-0.37972	510.8	0.03946	0.03844	0.03598	0.04026
										510.7	-346.581	-111.768	-44.7717	-0.20532	510.7	0.03959	0.03857	0.03608	0.04046
										510.6	-348.107	-112.7	-45.7003	0.0857	510.6	0.03974	0.0387	0.0362	0.0406
										510.5	-349.031	-114.368	-46.3481	-0.51004	510.5	0.03989	0.03885	0.03632	0.04076
										510.4	-350.072	-115.38	-45.3188	-1.8681	510.4	0.04005	0.03894	0.03648	0.04096
										510.3	-351.471	-115.636	-44.924	-1.61881	510.3	0.04021	0.03904	0.03662	0.04108
										510.2	-351.803	-115.88	-45.2334	-1.20441	510.2	0.04035	0.03914	0.03671	0.04117
										510.1	-352.617	-115.931	-45.6742	-0.65655	510.1	0.04047	0.03922	0.03682	0.04125
										510	-354.226	-117.263	-45.4937	-0.55688	510	0.04062	0.03934	0.03695	0.04138
										509.9	-355.344	-116.872	-44.5883	-0.43509	509.9	0.04073	0.03947	0.03707	0.0415
										509.8	-357.02	-117.034	-45.188	0.80028	509.8	0.04084	0.0396	0.03715	0.04159
										509.7	-357.846	-117.919	-46.0896	0.5888	509.7	0.04096	0.03972	0.03724	0.04171
										509.6	-358.773	-119.626	-47.6452	1.98425	509.6	0.04107	0.03982	0.03736	0.04185
										509.5	-360.491	-119.572	-47.0255	1.36386	509.5	0.04121	0.03997	0.03746	0.04196
										509.4	-362.293	-120.164	-48.0282	0.95845	509.4	0.04136	0.04011	0.03758	0.04211
										509.3	-362.756	-121.567	-47.8521	0.38622	509.3	0.04148	0.0402	0.03772	0.04222
										509.2	-365.699	-121.438	-48.3657	2.03469	509.2	0.04161	0.04029	0.03784	0.04233
										509.1	-366.48	-122.471	-48.635	1.45412	509.1	0.04174	0.04043	0.03796	0.0424
										509	-368.387	-122.543	-49.5092	1.34961	509	0.04188	0.04054	0.03808	0.04251
										508.9	-369.996	-122.656	-50.2212	1.42872	508.9	0.04201	0.04064	0.03822	0.04259
										508.8	-371.559	-123.748	-51.6346	1.86801	508.8	0.04218	0.04073	0.03834	0.04271
										508.7	-373.742	-126.375	-51.8201	0.73184	508.7	0.04235	0.04083	0.03845	0.0428
										508.6	-375.711	-127.961	-52.772	1.21356	508.6	0.04251	0.04097	0.03858	0.04292
										508.5	-376.816	-127.072	-52.8679	0.5634	508.5	0.04265	0.04108	0.03868	0.04307
										508.4	-377.734	-127.206	-53.7625	1.11535	508.4	0.04276	0.04117	0.03878	0.04318
										508.3	-379.75	-127.992	-55.2172	0.61371	508.3	0.04286	0.0413	0.03889	0.04331
										508.2	-381.166	-127.469	-56.4321	0.06928	508.2	0.04297	0.04145	0.03897	0.04344
										508.1	-383.66	-128.623	-57.3268	-0.6468	508.1	0.04307	0.0416	0.03907	0.04359
										508	-385.605	-129.28	-58.057	-1.30776	508	0.04323	0.04174	0.03916	0.04369
										507.9	-387.407	-128.856	-58.3745	-1.61775	507.9	0.04337	0.04191	0.0393	0.04381
										507.8	-388.665	-129.26	-58.0075	-1.67426	507.8	0.0435	0.04205	0.03943	0.04395
										507.7	-390.566	-129.472	-57.2147	-1.2473	507.7	0.04362	0.04215	0.0396	0.04404
										507.6	-393.266	-131.134	-58.2083	-1.06892	507.6	0.04378	0.04232	0.0397	0.04418
										507.5	-394.65	-130.874	-56.7623	-0.92578	507.5	0.04392	0.04244	0.03985	0.04425
										507.4	-396.04	-131.363	-55.5252	-1.53552	507.4	0.04414	0.04262	0.04001	0.04437
										507.3	-397.893	-132.114	-56.4967	-1.96513	507.3	0.04423	0.04275	0.04009	0.04451
										507.2	-399.351	-132.564	-55.7867	-2.38999	507.2	0.04429	0.04285	0.04019	0.04456
										507.1	-400.133	-133.223	-56.6154	-0.17763	507.1	0.0444	0.04296	0.04024	0.04466
										507	-401.872	-132.752	-57.3451	-1.36608	507	0.04454	0.04309	0.04032	0.04478
										506.9	-403.51	-132.753	-57.9272	-0.8307	506.9	0.04469	0.04325	0.04044	0.04491
										506.8	-405.735	-133.717	-58.9002	-1.38887	506.8	0.04485	0.04339	0.04055	0.04508
										506.7	-406.305	-134.014	-58.8301	-0.7716	506.7	0.04498	0.04353	0.04068	0.0452
										506.6	-407.942	-133.857	-59.4453	-0.43736	506.6	0.0451	0.0437	0.04079	0.04535
										506.5	-408.221	-134.253	-58.3889	-1.48628	506.5	0.04526	0.04381	0.04096	0.04549
										506.4	-410.315	-135.077	-57.9437	-0.75571	506.4	0.04538	0.04397	0.0411	0.04563
										506.3	-410.963	-135.572	-56.7248	-2.33321	506.3	0.04554	0.04414	0.04123	0.04574
										506.2	-412.432	-137.928	-57.5951	-2.21791	506.2	0.04568	0.04429	0.04138	0.04589
										506.1	-413.252	-138.95	-56.1044	-2.29887	506.1	0.0458	0.04439	0.04148	0.04602
										506	-415.023	-138.148	-56.3875	-2.48211	506	0.04592	0.04459	0.04156	0.04618
										505.9	-416.509	-140.864	-56.6016	-2.23161	505.9	0.0461	0.04475	0.04168	0.04633
										505.8	-416.522	-141.049	-57.47	-0.93851	505.8	0.04621	0.04487	0.0418	0.04646
										505.7	-417.678	-141.404	-57.439	-0.40254	505.7	0.04631	0.04497	0.0419	0.04658
										505.6	-418.115	-141.579	-56.0466	-0.22281	505.6	0.04646	0.04509	0.04205	0.04671
										505.5	-418.15	-141.148	-56.3869	-0.6312	505.5	0.04651	0.04523	0.04218	0.04684
										505.4	-418.344	-141.904	-56.0127	1.16663	505.4	0.04655	0.04537	0.04233	0.04701
										505.3	-419.521	-142.001	-55.6422	-0.57009	505.3	0.0467	0.04552	0.04246	0.04712
										505.2	-421.946	-143.131	-55.2164	0.14395	505.2	0.04685	0.04569	0.04261	0.04723
										505.1	-424.413	-144.743	-54.3536	0.25494	505.1	0.04702	0.04583	0.04273	0.0474
										505	-425.508	-144.657	-54.5283	0.4459	505	0.04717	0.04594	0.04288	0.0475
										504.9	-427.071	-145.2	-54.3365	0.61147	504.9	0.04738	0.04611	0.04302	0.04762
										504.8	-429.077	-145.876	-54.2502	0.24178	504.8	0.04757	0.04627	0.04314	0.04771
										504.7	-429.146	-146.746	-54.2988	0.93204	504.7	0.04771	0.04637	0.04329	0.04782
										504.6	-431.809	-146.22	-56.5427	-0.42181	504.6	0.04787	0.04648	0.04338	0.04796
										504.5	-432.35	-145.906	-56.266	0.34659	504.5	0.04798	0.04662	0.04349	0.04808
										504.4	-433.732	-147.102	-56.7981	0.55437	504.4	0.04816	0.04678	0.04362	0.0482
										504.3	-434.037	-148.142	-58.3135	-0.44388	504.3	0.0483	0.0469	0.0437	0.04833
										504.2	-436.879	-148.452	-58.7319	-0.22085	504.2	0.04841	0.04701	0.04376	0.04851
										504.1	-437.3	-148.926	-59.6173	0.91804	504.1	0.04855	0.0471	0.04389	0.04863
										504	-437.998	-149.467	-59.9372	0.63207	504	0.04872	0.04722	0.04403	0.04878
										503.9	-440.041	-149.436	-61.1709	1.32566	503.9	0.04891	0.04743	0.04417	0.04896
										503.8	-442.093	-149.601	-61.5219	0.30022	503.8	0.04904	0.04765	0.04432	0.04913
										503.7	-443.684	-150.074	-62.3548	0.57374	503.7	0.04922	0.04778	0.04449	0.04926
										503.6	-444.369	-151.405	-62.4269	-0.51023	503.6	0.04938	0.04791	0.04464	0.04942
										503.5	-446.473	-151.36	-62.3729	-0.27216	503.5	0.04951	0.04806	0.04478	0.04956
										503.4	-449.512	-153.47	-64.145	-0.7705	503.4	0.04965	0.04818	0.04493	0.0497
										503.3	-450.844	-153.273	-63.5267	0.78186	503.3	0.04982	0.04831	0.04504	0.04985
										503.2	-452.863	-153.575	-64.2872	-0.51524	503.2	0.04998	0.04848	0.04516	0.04997
										503.1	-454.73	-153.421	-65.3418	0.2273	503.1	0.05012	0.04862	0.04523	0.05012
										503	-455.04	-153.644	-66.2118	1.34412	503	0.05024	0.04875	0.04531	0.05025
										502.9	-456.441	-152.596	-66.3201	2.78798	502.9	0.05034	0.04883	0.04538	0.0504
										502.8	-458.099	-152.537	-66.303	3.93323	502.8	0.05048	0.04897	0.04555	0.05057
										502.7	-459.657	-153.159	-66.3416	3.09991	502.7	0.05064	0.04907	0.0457	0.05072
										502.6	-461.593	-151.43	-66.4066	2.04623	502.6	0.05076	0.04923	0.04587	0.05091
										502.5	-464.124	-151.984	-66.4079	0.91704	502.5	0.05099	0.04943	0.04602	0.0511
										502.4	-465.885	-152.639	-67.4019	1.27275	502.4	0.05117	0.04962	0.04617	0.0513
										502.3	-468.758	-154.257	-68.0782	-0.24717	502.3	0.05135	0.04979	0.04629	0.05144
										502.2	-470.767	-154.604	-67.6722	-0.65668	502.2	0.05164	0.05003	0.04646	0.05167
										502.1	-473.366	-154.245	-68.2488	0.54238	502.1	0.05181	0.05022	0.04657	0.05183
										502	-475.094	-154.896	-68.4914	0.74643	502	0.05196	0.05031	0.04669	0.05196
										501.9	-476.872	-154.569	-69.5209	0.41852	501.9	0.05209	0.05045	0.04678	0.05212
										501.8	-479.488	-154.77	-71.006	-0.9852	501.8	0.05224	0.05061	0.04689	0.05227
										501.7	-480.897	-156.43	-70.0125	-1.41766	501.7	0.05233	0.05074	0.04702	0.05238
										501.6	-482.023	-157.428	-70.9006	-1.46601	501.6	0.05241	0.05082	0.04719	0.05254
										501.5	-483.205	-157.861	-71.842	0.53533	501.5	0.05252	0.05092	0.04735	0.05271
										501.4	-485.854	-159.385	-71.8117	0.25092	501.4	0.05268	0.05105	0.04752	0.05291
										501.3	-486.304	-159.207	-71.7197	0.91532	501.3	0.05286	0.05123	0.0477	0.05311
										501.2	-488.793	-161.113	-72.7963	1.50316	501.2	0.05303	0.05139	0.04783	0.05329
										501.1	-490.079	-161.214	-72.5736	2.78391	501.1	0.05318	0.05155	0.04799	0.05347
										501	-492.777	-162.052	-72.075	3.2567	501	0.05333	0.0517	0.04815	0.05363
										500.9	-494.823	-162.55	-72.8465	3.07703	500.9	0.05351	0.05185	0.04831	0.05381
										500.8	-495.877	-163.854	-71.501	3.51152	500.8	0.05368	0.05204	0.04848	0.05401
										500.7	-499.063	-164.122	-71.2508	3.93033	500.7	0.05386	0.0522	0.04863	0.05417
										500.6	-500.243	-165.062	-70.4763	3.34745	500.6	0.05402	0.05233	0.04876	0.0543
										500.5	-501.749	-166.813	-70.8502	4.08838	500.5	0.05418	0.05245	0.04887	0.05445
										500.4	-503.399	-167.208	-70.1785	4.35817	500.4	0.05435	0.0526	0.04903	0.05459
										500.3	-505.24	-167.827	-70.0641	4.66778	500.3	0.05448	0.05278	0.04914	0.05472
										500.2	-506.11	-169.103	-69.4417	4.25819	500.2	0.05459	0.05294	0.04926	0.05488
										500.1	-507.353	-168.917	-69.1729	4.47731	500.1	0.05474	0.0531	0.04939	0.05504
										500	-508.858	-171.024	-69.5069	3.7923	500	0.0549	0.05327	0.04951	0.05522
										499.9	-510.782	-171.785	-69.6256	5.06223	499.9	0.05508	0.05343	0.04969	0.0554
										499.8	-511.625	-172.451	-69.202	3.90439	499.8	0.05527	0.05357	0.04986	0.05555
										499.7	-515.141	-172.815	-70.0408	3.37661	499.7	0.05548	0.05377	0.05009	0.05571
										499.6	-517.641	-172.609	-70.8667	2.69631	499.6	0.05568	0.05397	0.05028	0.05583
										499.5	-520.219	-174.136	-71.2936	2.00357	499.5	0.05592	0.05421	0.05045	0.05601
										499.4	-522.162	-176.122	-70.9143	2.93965	499.4	0.05606	0.05441	0.0506	0.05618
										499.3	-523.742	-179.127	-72.2979	3.30261	499.3	0.05625	0.05461	0.05072	0.05633
										499.2	-525.182	-179.094	-71.4627	3.38075	499.2	0.05641	0.05475	0.05084	0.05649
										499.1	-527.013	-179.839	-70.9873	2.86707	499.1	0.05655	0.05487	0.05094	0.05663
										499	-528.503	-180.761	-71.3031	3.14234	499	0.05671	0.05506	0.05107	0.05685
										498.9	-532.165	-181.827	-71.6308	2.95366	498.9	0.05686	0.05518	0.05124	0.05697
										498.8	-534.544	-183.979	-71.3315	1.14019	498.8	0.05704	0.05531	0.0514	0.05713
										498.7	-535.723	-184.676	-72.1889	1.27029	498.7	0.05723	0.05549	0.05157	0.05733
										498.6	-538.338	-185.596	-72.2532	1.72695	498.6	0.05736	0.05565	0.05174	0.0575
										498.5	-539.054	-186.327	-71.8563	2.41007	498.5	0.05754	0.05587	0.05194	0.05768
										498.4	-541.328	-185.997	-72.2008	1.5483	498.4	0.05776	0.05608	0.05209	0.05787
										498.3	-543.192	-185.853	-71.7007	1.54981	498.3	0.05796	0.05628	0.05216	0.05803
										498.2	-544.785	-185.89	-70.8291	1.00741	498.2	0.05817	0.05648	0.05224	0.05821
										498.1	-547.018	-184.87	-70.617	0.95533	498.1	0.05835	0.05663	0.05235	0.05836
										498	-550.614	-186.23	-69.7546	2.14939	498	0.05853	0.05677	0.05249	0.05853
										497.9	-552.617	-186.129	-70.5352	0.99723	497.9	0.05868	0.05693	0.05267	0.05872
										497.8	-554.181	-185.94	-71.5461	-0.56787	497.8	0.05883	0.05712	0.05282	0.05887
										497.7	-556.261	-186.379	-72.0144	-0.5722	497.7	0.05903	0.05731	0.05297	0.05904
										497.6	-557.273	-187.738	-72.9331	0.09767	497.6	0.05917	0.05751	0.05314	0.05915
										497.5	-559.515	-186.946	-73.6701	-1.87406	497.5	0.05935	0.0577	0.05329	0.05928
										497.4	-561.145	-189.488	-73.9646	-1.58914	497.4	0.05953	0.05786	0.05346	0.0594
										497.3	-564.111	-190.834	-73.7085	-1.05791	497.3	0.05968	0.05803	0.05366	0.05955
										497.2	-565.752	-190.849	-74.3929	-1.0665	497.2	0.05984	0.05819	0.05381	0.0597
										497.1	-568.011	-190.908	-74.7185	-1.42939	497.1	0.06004	0.05835	0.05394	0.05987
										497	-570.39	-190.952	-75.8988	-2.50176	497	0.06021	0.0585	0.05411	0.06006
										496.9	-573.401	-191.802	-76.8917	-2.31665	496.9	0.06045	0.05866	0.05426	0.06018
										496.8	-574.722	-192.508	-77.9039	-1.9282	496.8	0.06067	0.05882	0.0544	0.06036
										496.7	-577.119	-193.799	-77.9452	-2.52586	496.7	0.06087	0.05899	0.05458	0.06054
										496.6	-580.266	-194.451	-78.9156	-3.07682	496.6	0.06105	0.05918	0.05469	0.06071
										496.5	-582.688	-195.842	-78.6583	-3.19099	496.5	0.06123	0.05939	0.05484	0.06092
										496.4	-584.992	-197.303	-78.2342	-3.78733	496.4	0.06143	0.05956	0.05499	0.06112
										496.3	-585.797	-198.235	-77.2443	-3.83623	496.3	0.06159	0.05977	0.05514	0.06134
										496.2	-588.489	-199.536	-79.9449	-3.71506	496.2	0.06177	0.05994	0.05533	0.06153
										496.1	-590.688	-198.996	-81.1687	-3.08677	496.1	0.0619	0.0601	0.05552	0.06169
										496	-591.571	-197.621	-81.0775	-2.27378	496	0.06208	0.0603	0.05575	0.06188
										495.9	-594.414	-199.524	-81.1618	-2.9773	495.9	0.06227	0.06049	0.05598	0.06206
										495.8	-596.03	-199.503	-81.2114	-3.07061	495.8	0.06246	0.06071	0.05615	0.0622
										495.7	-596.581	-200.187	-82.1054	-2.57989	495.7	0.06263	0.06088	0.05635	0.06232
										495.6	-597.694	-200.093	-82.0921	-2.04749	495.6	0.06283	0.06112	0.0565	0.06248
										495.5	-599.819	-200.951	-82.7272	-2.23554	495.5	0.06306	0.06136	0.05661	0.06262
										495.4	-601.407	-201.924	-82.9514	-2.57192	495.4	0.06326	0.06158	0.05675	0.06276
										495.3	-602.609	-201.791	-83.0513	-3.21249	495.3	0.06347	0.06175	0.05694	0.06294
										495.2	-604.234	-202.838	-83.0108	-3.49432	495.2	0.06366	0.06192	0.0571	0.06314
										495.1	-606.105	-202.879	-82.2884	-1.32685	495.1	0.06383	0.0621	0.05727	0.06335
										495	-607.25	-204.865	-82.4974	-1.1011	495	0.06401	0.06227	0.05749	0.0635
										494.9	-610.067	-205.791	-83.3592	-2.10679	494.9	0.06418	0.06244	0.05776	0.06368
										494.8	-612.468	-207.971	-84.2472	-3.46464	494.8	0.0644	0.06263	0.05794	0.06384
										494.7	-614.467	-208.683	-85.3843	-3.91376	494.7	0.06462	0.06285	0.05815	0.06405
										494.6	-615.689	-209.013	-84.9639	-5.0284	494.6	0.06485	0.06302	0.05839	0.06424
										494.5	-619.028	-211.161	-84.7418	-3.45209	494.5	0.0651	0.0632	0.05857	0.0645
										494.4	-622.317	-211.958	-85.0667	-4.43751	494.4	0.06535	0.06342	0.05874	0.06468
										494.3	-624.955	-211.747	-83.9592	-5.68102	494.3	0.06559	0.06361	0.05895	0.06493
										494.2	-627.008	-212.653	-83.8676	-5.83217	494.2	0.06576	0.06381	0.05913	0.06514
										494.1	-630.073	-214.171	-83.58	-6.27154	494.1	0.06601	0.06406	0.05933	0.06537
										494	-631.887	-213.018	-84.1006	-6.42507	494	0.06624	0.06428	0.05948	0.06557
										493.9	-633.519	-214.77	-84.6117	-6.34304	493.9	0.06644	0.0645	0.05965	0.06577
										493.8	-635.117	-215.035	-84.9881	-6.19789	493.8	0.06657	0.0647	0.05979	0.06601
										493.7	-636.49	-216.28	-84.8646	-6.90909	493.7	0.06676	0.0649	0.05992	0.06619
										493.6	-638.812	-216.887	-84.4824	-5.22835	493.6	0.06693	0.0651	0.06012	0.06641
										493.5	-641.442	-217.327	-84.8902	-5.14955	493.5	0.06707	0.06532	0.0603	0.0666
										493.4	-643.314	-217.75	-84.2911	-5.24671	493.4	0.06732	0.06554	0.06054	0.06681
										493.3	-645.844	-218.469	-85.4952	-4.46008	493.3	0.0675	0.06579	0.06071	0.06705
										493.2	-647.594	-220.527	-86.2891	-2.781	493.2	0.06775	0.06598	0.06094	0.06722
										493.1	-650.683	-221.907	-87.4785	-2.53979	493.1	0.06799	0.06616	0.06113	0.06741
										493	-652.376	-220.659	-88.0344	-2.7423	493	0.06817	0.06632	0.06128	0.06761
										492.9	-654.583	-221.515	-86.7832	-1.87522	492.9	0.06842	0.06653	0.06143	0.06784
										492.8	-657.037	-222.478	-85.8963	-1.77309	492.8	0.06864	0.0668	0.06157	0.06804
										492.7	-660.75	-224.165	-86.7884	-3.1511	492.7	0.06885	0.06695	0.06169	0.06823
										492.6	-662.874	-224.106	-87.5675	-3.02496	492.6	0.06897	0.06708	0.06178	0.06839
										492.5	-664.752	-225.999	-88.5983	-1.68986	492.5	0.06918	0.06725	0.06194	0.06865
										492.4	-668.513	-227.502	-88.4882	-2.97229	492.4	0.06933	0.06747	0.06212	0.06886
										492.3	-671.021	-229.031	-88.2794	-1.81988	492.3	0.06953	0.06764	0.0623	0.06909
										492.2	-674.336	-229.045	-88.2527	-1.59801	492.2	0.06972	0.0678	0.06254	0.06929
										492.1	-676.779	-231.683	-88.2604	-1.74023	492.1	0.06992	0.06797	0.06277	0.06953
										492	-678.994	-232.012	-87.9359	-2.80983	492	0.07014	0.06817	0.06298	0.06974
										491.9	-682.374	-233.076	-88.4127	-0.48561	491.9	0.07033	0.0684	0.06318	0.06995
										491.8	-685.36	-233.116	-88.1093	-0.28987	491.8	0.07058	0.06863	0.06337	0.07016
										491.7	-689.496	-232.067	-88.4913	-1.32244	491.7	0.07081	0.06888	0.06355	0.07036
										491.6	-691.927	-232.96	-88.6647	0.33969	491.6	0.07105	0.06912	0.06369	0.07059
										491.5	-694.183	-234.769	-90.0398	0.93119	491.5	0.07127	0.06938	0.06388	0.07081
										491.4	-696.326	-235.854	-89.8664	1.10326	491.4	0.0715	0.06958	0.06406	0.07102
										491.3	-698.845	-238.496	-89.9501	0.28031	491.3	0.07174	0.06985	0.06419	0.07118
										491.2	-701.535	-240.444	-90.2301	1.65118	491.2	0.07195	0.07012	0.06433	0.07136
										491.1	-703.398	-240.681	-90.2245	3.13955	491.1	0.07212	0.07033	0.06453	0.07155
										491	-704.341	-242.08	-90.11	4.02863	491	0.07229	0.07053	0.0647	0.07173
										490.9	-705.36	-241.938	-91.5211	5.28238	490.9	0.07254	0.07074	0.06488	0.0719
										490.8	-707.339	-241.988	-92.7521	7.59682	490.8	0.0727	0.07097	0.06505	0.07211
										490.7	-709.157	-242.429	-93.0245	7.77459	490.7	0.07293	0.07117	0.06522	0.07232
										490.6	-711.017	-244.425	-94.0465	6.60856	490.6	0.07313	0.07137	0.06545	0.07253
										490.5	-713.879	-246.914	-95.3492	6.02595	490.5	0.07342	0.07157	0.06567	0.07274
										490.4	-716.989	-247.619	-95.1438	6.45956	490.4	0.07367	0.07176	0.0659	0.07299
										490.3	-720.06	-248.471	-95.4653	7.41034	490.3	0.07397	0.07199	0.0661	0.0732
										490.2	-723.348	-250.923	-95.5324	6.77589	490.2	0.07427	0.07222	0.0663	0.07348
										490.1	-726.362	-248.775	-96.2828	6.70153	490.1	0.07454	0.07241	0.06648	0.0737
										490	-729.911	-249.694	-96.9733	6.00856	490	0.0748	0.07257	0.0667	0.0739
										489.9	-731.73	-249.942	-95.9409	6.15585	489.9	0.07499	0.07276	0.06687	0.0741
										489.8	-734.097	-249.557	-95.1945	6.0777	489.8	0.07519	0.07295	0.06707	0.07435
										489.7	-736.073	-250.301	-96.5835	6.96939	489.7	0.07539	0.0732	0.0673	0.07457
										489.6	-739.658	-252.265	-97.5215	8.04878	489.6	0.07558	0.07344	0.06749	0.07478
										489.5	-741.971	-253.999	-98.3517	7.24543	489.5	0.07579	0.07367	0.06774	0.07498
										489.4	-743.372	-255.163	-97.9646	6.98705	489.4	0.07602	0.07387	0.06802	0.07519
										489.3	-745.849	-257.558	-98.1361	6.05324	489.3	0.07631	0.07409	0.06826	0.07538
										489.2	-749.062	-258.418	-97.4466	4.9257	489.2	0.07664	0.07429	0.06854	0.07556
										489.1	-751.436	-258.752	-98.6671	7.83627	489.1	0.07693	0.07452	0.06873	0.07579
										489	-754.493	-258.652	-100.37	8.14457	489	0.07722	0.07474	0.06891	0.07601
										488.9	-756.729	-260.675	-102.424	8.89579	488.9	0.07747	0.07498	0.06909	0.07626
										488.8	-760.029	-262.105	-104.59	8.6743	488.8	0.07777	0.07528	0.06928	0.07649
										488.7	-763.23	-261.746	-104.657	11.6087	488.7	0.07807	0.07549	0.06948	0.07673
										488.6	-765.124	-262.965	-106.507	9.45402	488.6	0.07835	0.07572	0.06967	0.07695
										488.5	-767.484	-264	-107.215	8.07113	488.5	0.07858	0.07597	0.0699	0.07723
										488.4	-768.372	-265.832	-107.991	9.38809	488.4	0.07882	0.07623	0.07008	0.0775
										488.3	-771.326	-267.127	-107.601	8.92228	488.3	0.07907	0.07645	0.07032	0.07779
										488.2	-773.383	-266.703	-107.605	9.73278	488.2	0.07933	0.07666	0.07056	0.07812
										488.1	-776.606	-265.979	-108.775	8.26364	488.1	0.0796	0.07691	0.0708	0.07836
										488	-779.351	-265.488	-109.244	7.89913	488	0.07987	0.07714	0.07106	0.07862
										487.9	-781.702	-266.895	-110.123	8.75802	487.9	0.08004	0.07735	0.07123	0.07883
										487.8	-784.785	-266.859	-110.694	8.98127	487.8	0.0803	0.07762	0.07146	0.07914
										487.7	-786.819	-268.07	-112.092	8.17456	487.7	0.08058	0.07778	0.07172	0.07936
										487.6	-791.131	-270.141	-112.713	8.15993	487.6	0.08086	0.07803	0.07197	0.07965
										487.5	-794.56	-272.578	-112.831	8.61427	487.5	0.08118	0.07827	0.07227	0.07996
										487.4	-795.9	-272.273	-111.694	8.71181	487.4	0.08146	0.07851	0.07253	0.08021
										487.3	-800.182	-272.485	-111.859	9.72519	487.3	0.08174	0.07874	0.07278	0.08051
										487.2	-803.402	-271.786	-109.75	10.959	487.2	0.08203	0.07899	0.07301	0.08079
										487.1	-805.525	-272.846	-109.423	11.163	487.1	0.08222	0.07922	0.07326	0.08103
										487	-807.79	-273.333	-111.102	11.5669	487	0.08249	0.07952	0.07349	0.08124
										486.9	-809.834	-275.232	-111.599	12.3336	486.9	0.08266	0.07981	0.07377	0.08147
										486.8	-810.529	-278.713	-112.534	12.3245	486.8	0.08286	0.08013	0.074	0.08169
										486.7	-813.534	-280.452	-111.923	13.2595	486.7	0.0831	0.08045	0.07424	0.08196
										486.6	-815.903	-280.14	-113.047	13.5451	486.6	0.08333	0.08074	0.0745	0.08223
										486.5	-818.301	-282.668	-113.217	13.7478	486.5	0.08368	0.08103	0.0747	0.08249
										486.4	-822.481	-285.39	-113.961	13.4507	486.4	0.08398	0.08132	0.07492	0.08275
										486.3	-825.48	-285.302	-114.566	13.768	486.3	0.08431	0.08153	0.07513	0.08302
										486.2	-829.935	-285.935	-116.335	12.548	486.2	0.08468	0.08178	0.07535	0.08328
										486.1	-832.141	-286.857	-116.907	12.9121	486.1	0.08498	0.08201	0.07554	0.08351
										486	-835.406	-286.422	-116.786	14.4257	486	0.08521	0.08231	0.07572	0.08377
										485.9	-836.526	-285.259	-119.238	15.2889	485.9	0.08545	0.08258	0.07596	0.08402
										485.8	-839.94	-285.416	-119.355	14.7685	485.8	0.08568	0.08276	0.07624	0.0843
										485.7	-842.091	-287.167	-119.288	12.7053	485.7	0.08589	0.08301	0.07653	0.08454
										485.6	-845.222	-286.174	-117.469	12.3038	485.6	0.08611	0.08327	0.07685	0.08485
										485.5	-849.172	-287.643	-115.216	10.9666	485.5	0.08634	0.08354	0.07716	0.08512
										485.4	-849.926	-288.558	-115.428	11.5058	485.4	0.08655	0.08381	0.07742	0.08542
										485.3	-852.619	-291.986	-115.175	11.0675	485.3	0.08676	0.08411	0.07765	0.08572
										485.2	-857.112	-293.478	-115.169	11.2214	485.2	0.08704	0.08442	0.07789	0.08599
										485.1	-860.58	-295.292	-115.649	11.4926	485.1	0.08738	0.08466	0.07819	0.0862
										485	-865.458	-296.432	-117.491	11.7854	485	0.08767	0.08496	0.07845	0.08643
										484.9	-870.166	-298.302	-119.318	10.7758	484.9	0.08801	0.08525	0.07875	0.08664
										484.8	-872.479	-300.612	-119.773	13.1585	484.8	0.0883	0.08553	0.07901	0.08684
										484.7	-876.672	-301.614	-119.499	15.7028	484.7	0.08857	0.08581	0.07932	0.08711
										484.6	-877.966	-302.593	-119.011	14.7939	484.6	0.08886	0.08607	0.07958	0.08741
										484.5	-882.148	-304.67	-120.775	13.5273	484.5	0.08913	0.08625	0.07989	0.08764
										484.4	-887.298	-304.886	-120.385	13.2199	484.4	0.08941	0.08662	0.08018	0.08794
										484.3	-888.53	-305.342	-119.899	14.0715	484.3	0.08966	0.08688	0.08041	0.08824
										484.2	-891.883	-305.684	-121.944	13.3483	484.2	0.08991	0.08713	0.08065	0.08851
										484.1	-895.634	-307.04	-121.763	13.9069	484.1	0.09012	0.08738	0.0809	0.08879
										484	-896.692	-308.039	-122.128	14.8509	484	0.09038	0.08764	0.08118	0.08904
										483.9	-900.727	-309.714	-123.925	13.3768	483.9	0.09065	0.08794	0.0814	0.08926
										483.8	-902.704	-310.211	-124.662	14.0454	483.8	0.09095	0.08828	0.08163	0.08956
										483.7	-907.468	-312.213	-125.049	14.3931	483.7	0.0913	0.08857	0.08187	0.08986
										483.6	-911.908	-312.369	-125.297	14.3011	483.6	0.09168	0.08885	0.08214	0.09016
										483.5	-916.07	-310.665	-125.667	14.1302	483.5	0.09201	0.08911	0.08245	0.09042
										483.4	-919.549	-312.47	-127.413	13.9842	483.4	0.09239	0.08947	0.08281	0.09074
										483.3	-922.671	-314.602	-128.09	13.3463	483.3	0.09268	0.08977	0.08308	0.09102
										483.2	-925.926	-312.601	-127.162	13.0333	483.2	0.09288	0.09005	0.08337	0.09126
										483.1	-927.867	-314.5	-127.354	12.3758	483.1	0.09309	0.09034	0.08365	0.09152
										483	-930.978	-317.379	-128.249	12.2585	483	0.09336	0.09067	0.08397	0.09183
										482.9	-932.988	-318.088	-129.035	12.1679	482.9	0.09361	0.09092	0.08425	0.0921
										482.8	-936.994	-319.561	-128.867	11.0841	482.8	0.09389	0.09121	0.08455	0.0924
										482.7	-941.843	-321.23	-129.338	9.64926	482.7	0.09427	0.09155	0.08483	0.09272
										482.6	-945.437	-322.561	-128.759	8.91903	482.6	0.09456	0.09183	0.08504	0.09306
										482.5	-948.718	-323.067	-130.361	8.21045	482.5	0.09492	0.09222	0.08524	0.09337
										482.4	-952.651	-324.184	-129.021	8.80033	482.4	0.09527	0.09258	0.08544	0.09366
										482.3	-954.894	-327.22	-130.872	9.40671	482.3	0.09562	0.09293	0.08566	0.0939
										482.2	-957.422	-327.053	-132.166	10.4759	482.2	0.09589	0.09325	0.08595	0.09419
										482.1	-961.659	-327.423	-133.436	9.59145	482.1	0.0962	0.09354	0.08625	0.09445
										482	-965.968	-326.995	-135.584	10.5502	482	0.09651	0.09378	0.08659	0.09476
										481.9	-967.633	-327.586	-136.355	10.5344	481.9	0.09682	0.09405	0.0869	0.09508
										481.8	-970.253	-326.952	-137.577	10.3908	481.8	0.09708	0.09433	0.08717	0.09541
										481.7	-973.204	-326.654	-138.621	10.8954	481.7	0.09739	0.09468	0.0875	0.09584
										481.6	-974.679	-328.482	-138.005	12.028	481.6	0.09767	0.09495	0.08772	0.09617
										481.5	-977.854	-329.896	-137.469	12.3565	481.5	0.09797	0.09525	0.08793	0.0965
										481.4	-980.815	-332.265	-138.73	9.71878	481.4	0.09827	0.09554	0.08811	0.09682
										481.3	-984.197	-333.695	-140.539	10.7569	481.3	0.09857	0.0959	0.08834	0.09711
										481.2	-987.064	-335.369	-141.727	9.98234	481.2	0.09888	0.09627	0.08856	0.09739
										481.1	-991.219	-337.967	-142.812	11.6291	481.1	0.0992	0.0966	0.08883	0.09762
										481	-994.967	-338.779	-144.133	10.8354	481	0.0995	0.09693	0.08912	0.0979
										480.9	-998.7	-341.607	-144.327	8.53513	480.9	0.09982	0.09725	0.0894	0.09817
										480.8	-1002.46	-343.891	-145.642	6.04949	480.8	0.10014	0.0976	0.0897	0.09845
										480.7	-1006.31	-345.568	-146.04	5.47027	480.7	0.10043	0.09787	0.08999	0.0988
										480.6	-1009.9	-347.39	-147.47	4.71543	480.6	0.10075	0.0982	0.09037	0.09912
										480.5	-1014.48	-350.889	-147.717	3.25394	480.5	0.10103	0.09847	0.0907	0.09946
										480.4	-1017.7	-350.555	-147.735	2.90445	480.4	0.10132	0.09876	0.09102	0.09981
										480.3	-1020.72	-352.489	-149.169	2.98247	480.3	0.10172	0.09916	0.09135	0.10027
										480.2	-1025.25	-353.396	-149.989	1.49303	480.2	0.10206	0.09943	0.09162	0.1007
										480.1	-1029.31	-354.48	-149.644	1.58429	480.1	0.10242	0.09974	0.09192	0.10107
										480	-1034.22	-357.241	-150.346	3.55787	480	0.10278	0.10003	0.09224	0.1014
										479.9	-1038.18	-358.748	-152.697	2.98169	479.9	0.10318	0.10033	0.09252	0.10171
										479.8	-1043.89	-359.451	-152.912	3.90597	479.8	0.10355	0.10062	0.09279	0.102
										479.7	-1048.62	-361.562	-153.401	1.77043	479.7	0.10391	0.10097	0.09307	0.10231
										479.6	-1052.84	-362.137	-154.385	0.89108	479.6	0.10425	0.10136	0.09337	0.10262
										479.5	-1056.86	-362.885	-154.606	2.39983	479.5	0.10456	0.1017	0.09364	0.10295
										479.4	-1060.15	-365.681	-154.822	3.21529	479.4	0.10486	0.10203	0.09399	0.1033
										479.3	-1063.92	-368.029	-154.152	1.24128	479.3	0.1052	0.10245	0.09431	0.10363
										479.2	-1067.68	-371.545	-154.884	2.96568	479.2	0.10547	0.10276	0.09471	0.10397
										479.1	-1071.25	-371.65	-156.485	3.04481	479.1	0.10579	0.10303	0.09506	0.10435
										479	-1077.54	-372.954	-157.443	3.06372	479	0.10611	0.10331	0.09537	0.10473
										478.9	-1080.93	-373.997	-157.899	0.8339	478.9	0.1065	0.10366	0.09568	0.10515
										478.8	-1083.83	-376.268	-158.71	-0.16055	478.8	0.10688	0.10398	0.09594	0.10551
										478.7	-1088.21	-377.461	-158.578	-0.52276	478.7	0.10725	0.10433	0.09627	0.10578
										478.6	-1095.14	-380.813	-159.414	-0.98289	478.6	0.10772	0.10476	0.09662	0.1062
										478.5	-1098.96	-384.368	-159.338	-0.72117	478.5	0.10812	0.10506	0.09696	0.10654
										478.4	-1104.32	-387.025	-160.919	-1.76086	478.4	0.10847	0.10537	0.09721	0.10688
										478.3	-1110.35	-387.993	-162.461	-3.8543	478.3	0.10878	0.10574	0.09757	0.10723
										478.2	-1114.53	-389.253	-163.278	-3.72852	478.2	0.10913	0.10614	0.09787	0.10756
										478.1	-1117.67	-389.808	-162.885	-2.90334	478.1	0.10946	0.10651	0.09819	0.10788
										478	-1121.47	-388.954	-162.944	-3.04842	478	0.10978	0.10688	0.09857	0.10818
										477.9	-1125.26	-390.456	-162.503	-2.49889	477.9	0.1101	0.10723	0.0989	0.1085
										477.8	-1126.54	-390.933	-160.938	-3.94628	477.8	0.11047	0.10757	0.09921	0.10885
										477.7	-1132.72	-393.126	-161.201	-4.10761	477.7	0.11086	0.10791	0.09952	0.10921
										477.6	-1137.77	-392.298	-163.144	-4.66541	477.6	0.11124	0.10825	0.09979	0.10957
										477.5	-1143.56	-393.329	-163.54	-2.03836	477.5	0.11157	0.10858	0.10006	0.10995
										477.4	-1146.47	-393.803	-162.892	-1.7307	477.4	0.11194	0.10891	0.10034	0.11032
										477.3	-1149.83	-393.602	-163.012	-1.96142	477.3	0.11239	0.10921	0.1006	0.11069
										477.2	-1156.72	-395.762	-164.137	-2.19144	477.2	0.1129	0.10966	0.10099	0.11108
										477.1	-1161.81	-399.249	-166.183	-2.47014	477.1	0.11327	0.11004	0.10131	0.11138
										477	-1166.09	-402.692	-167.083	-3.40464	477	0.11367	0.11044	0.10167	0.11165
										476.9	-1170.08	-405.2	-166.912	-3.75376	476.9	0.11399	0.1108	0.10191	0.11193
										476.8	-1175.23	-406.628	-166.728	-2.85905	476.8	0.11429	0.11121	0.10218	0.11224
										476.7	-1177.81	-409.169	-166.341	-5.54129	476.7	0.11455	0.11161	0.10247	0.11256
										476.6	-1180.71	-410.838	-167.084	-4.44182	476.6	0.11481	0.11203	0.1028	0.11291
										476.5	-1184.16	-411.64	-165.874	-3.3284	476.5	0.11516	0.11246	0.10315	0.11331
										476.4	-1186.4	-414.096	-167.248	-1.65077	476.4	0.11548	0.11284	0.10349	0.11367
										476.3	-1189.95	-413.509	-166.515	-2.05364	476.3	0.11585	0.11323	0.1039	0.11399
										476.2	-1195.57	-416.594	-168.137	0.26022	476.2	0.11623	0.11364	0.10426	0.11439
										476.1	-1202.11	-419.152	-170.46	-2.21209	476.1	0.11667	0.11411	0.10467	0.11482
										476	-1207.43	-419.897	-170.952	-2.46942	476	0.11708	0.11447	0.105	0.11514
										475.9	-1211.64	-422.754	-171.91	-3.24579	475.9	0.11746	0.11489	0.10531	0.11546
										475.8	-1215.49	-425.375	-173.473	-3.72265	475.8	0.1179	0.11532	0.10562	0.1158
										475.7	-1220.32	-427.365	-173.125	-1.11421	475.7	0.11828	0.11572	0.10596	0.11614
										475.6	-1226.16	-430.68	-174.55	0.2325	475.6	0.11864	0.11612	0.10627	0.11646
										475.5	-1231.72	-432.273	-174.572	0.38438	475.5	0.11901	0.11657	0.1066	0.11683
										475.4	-1233.42	-433.684	-174.301	-1.05551	475.4	0.11937	0.11697	0.10691	0.1172
										475.3	-1237.44	-436.222	-173.473	-3.8203	475.3	0.11977	0.11749	0.10735	0.11764
										475.2	-1241.91	-437.435	-173.927	-2.84047	475.2	0.12014	0.11794	0.1077	0.11796
										475.1	-1244.55	-438.889	-173.357	-3.2509	475.1	0.12053	0.11828	0.10806	0.11831
										475	-1249.24	-442.23	-174.268	-2.65201	475	0.12095	0.11869	0.10837	0.11869
										474.9	-1255.06	-442.726	-176.64	-2.56736	474.9	0.12137	0.11901	0.10874	0.11914
										474.8	-1260.28	-446.259	-177.282	-2.34569	474.8	0.12182	0.11934	0.10906	0.11956
										474.7	-1263.67	-448.042	-178.188	-3.17261	474.7	0.1222	0.11969	0.10938	0.12004
										474.6	-1268.86	-451.317	-179.341	-2.00374	474.6	0.12268	0.12004	0.10972	0.12049
										474.5	-1274.62	-454.452	-182.607	-1.07718	474.5	0.12304	0.12036	0.11013	0.12094
										474.4	-1277.95	-457.364	-183.133	1.32862	474.4	0.12344	0.12074	0.11052	0.12135
										474.3	-1281.35	-461.585	-181.895	-0.02558	474.3	0.12396	0.12123	0.11095	0.12184
										474.2	-1285.27	-463.978	-182.757	-0.51031	474.2	0.12437	0.12167	0.11126	0.12216
										474.1	-1290.11	-467.081	-184.476	1.38229	474.1	0.12468	0.12211	0.11161	0.12249
										474	-1293.73	-468.273	-184.867	2.76877	474	0.125	0.12249	0.11196	0.12286
										473.9	-1298.24	-468.692	-184.65	3.93749	473.9	0.12531	0.12292	0.1123	0.12325
										473.8	-1302.96	-469.242	-185.255	2.75645	473.8	0.12571	0.12328	0.11264	0.12364
										473.7	-1305.65	-472.352	-184.764	3.34948	473.7	0.12607	0.12364	0.11306	0.12402
										473.6	-1310.8	-475.126	-186.152	1.65387	473.6	0.12654	0.12402	0.11342	0.12441
										473.5	-1316.69	-476.179	-189.015	1.65246	473.5	0.12703	0.12436	0.11383	0.12484
										473.4	-1323.3	-478.372	-190.717	1.75618	473.4	0.12753	0.12466	0.11415	0.12532
										473.3	-1328.75	-479.214	-190.991	0.47835	473.3	0.128	0.12503	0.11447	0.12579
										473.2	-1334.33	-479.898	-192.191	-0.11584	473.2	0.12843	0.12546	0.11491	0.12628
										473.1	-1339.32	-483.271	-192.174	-1.18338	473.1	0.12885	0.12585	0.11523	0.12671
										473	-1343.26	-484.419	-193.709	-0.05587	473	0.12927	0.12622	0.11557	0.12717
										472.9	-1347.86	-487.254	-194.176	-2.98017	472.9	0.12967	0.1266	0.11592	0.12761
										472.8	-1350.21	-488.856	-193.782	-0.13563	472.8	0.13009	0.12703	0.11632	0.12801
										472.7	-1355.35	-491.193	-195.017	-2.31779	472.7	0.13053	0.12743	0.11671	0.12842
										472.6	-1360.04	-491.794	-193.747	-2.32821	472.6	0.1309	0.12788	0.11705	0.12885
										472.5	-1365.37	-492.041	-192.853	-2.53086	472.5	0.13125	0.12831	0.1174	0.12927
										472.4	-1368.42	-494.405	-193.442	-5.55689	472.4	0.13164	0.12868	0.11776	0.12967
										472.3	-1371.57	-494.722	-194.389	-5.9351	472.3	0.13204	0.12906	0.11806	0.13012
										472.2	-1377.48	-495.083	-194.574	-6.11803	472.2	0.13242	0.1294	0.11841	0.13053
										472.1	-1383.71	-495.568	-196.232	-6.03208	472.1	0.13284	0.12975	0.11878	0.13088
										472	-1388.21	-499.249	-196.053	-5.13708	472	0.13317	0.13003	0.1191	0.13122
										471.9	-1392.63	-500.302	-196.429	-4.18093	471.9	0.13354	0.13036	0.11952	0.13165
										471.8	-1397.33	-501.406	-197.326	-3.60232	471.8	0.13399	0.13078	0.11996	0.13206
										471.7	-1401.87	-505.096	-198.547	-5.87198	471.7	0.13436	0.1312	0.12037	0.13248
										471.6	-1404.41	-507.582	-198.439	-7.48333	471.6	0.13479	0.13163	0.12082	0.13288
										471.5	-1409.33	-507.826	-197.795	-7.27662	471.5	0.1352	0.13205	0.12119	0.13332
										471.4	-1415.75	-510.873	-198.263	-8.41987	471.4	0.1356	0.13247	0.12157	0.13372
										471.3	-1419.52	-510.557	-199.403	-10.1451	471.3	0.13594	0.13289	0.12192	0.13417
										471.2	-1425.44	-510.557	-199.967	-10.8671	471.2	0.13637	0.13328	0.12226	0.13459
										471.1	-1429.54	-511.528	-200.405	-13.8549	471.1	0.13676	0.13375	0.12263	0.13498
										471	-1433.41	-512.394	-199.409	-15.659	471	0.13701	0.13411	0.12292	0.13529
										470.9	-1437.03	-514.107	-202.683	-13.6419	470.9	0.13742	0.13454	0.12327	0.13579
										470.8	-1442.93	-517.893	-204.704	-13.6752	470.8	0.13786	0.13494	0.1237	0.13622
										470.7	-1445.96	-520.668	-206.578	-15.1809	470.7	0.1383	0.13538	0.12404	0.1367
										470.6	-1450.45	-523.923	-205.74	-14.7087	470.6	0.13881	0.13578	0.12447	0.13718
										470.5	-1456.58	-526.309	-207.333	-12.9221	470.5	0.13927	0.13619	0.12484	0.13758
										470.4	-1461.66	-526.648	-209.004	-13.8457	470.4	0.13972	0.13661	0.12524	0.138
										470.3	-1465.37	-527.119	-210.23	-15.1415	470.3	0.14014	0.13711	0.12565	0.13849
										470.2	-1468.71	-528.856	-210.744	-13.4019	470.2	0.14044	0.13758	0.12604	0.13896
										470.1	-1473.39	-531.308	-209.5	-15.5809	470.1	0.14081	0.13803	0.12643	0.13942
										470	-1474.21	-531.563	-208.266	-14.9683	470	0.14106	0.13837	0.12676	0.13975
										469.9	-1477.97	-535.898	-209.147	-13.9566	469.9	0.14144	0.13878	0.12715	0.14019
										469.8	-1481.02	-536.1	-208.236	-14.4313	469.8	0.14188	0.13909	0.12747	0.14062
										469.7	-1486.04	-535.505	-211.084	-14.0247	469.7	0.14237	0.13945	0.12793	0.14111
										469.6	-1489.13	-538.43	-212.18	-13.1576	469.6	0.14286	0.13985	0.12834	0.14148
										469.5	-1493.99	-538.691	-212.658	-12.875	469.5	0.14332	0.14029	0.12876	0.14191
										469.4	-1499.32	-541.548	-213.95	-14.1036	469.4	0.14382	0.14067	0.1291	0.14236
										469.3	-1504.29	-543.376	-216.04	-12.3978	469.3	0.14427	0.14106	0.1295	0.14284
										469.2	-1510.17	-544.7	-217.702	-12.8839	469.2	0.14481	0.14148	0.1299	0.14329
										469.1	-1513	-547.414	-219.881	-11.8022	469.1	0.14532	0.14181	0.13028	0.14374
										469	-1519.69	-548.852	-221.291	-10.6	469	0.14578	0.14223	0.1307	0.14419
										468.9	-1526.39	-551.465	-222.541	-9.55374	468.9	0.1463	0.14262	0.13114	0.14457
										468.8	-1528.91	-553.604	-222.527	-9.19272	468.8	0.14672	0.14306	0.13153	0.14496
										468.7	-1533.93	-557.478	-224.964	-10.1909	468.7	0.14718	0.14349	0.1319	0.1454
										468.6	-1538.49	-558.741	-226.305	-8.39285	468.6	0.14769	0.14392	0.13225	0.1458
										468.5	-1541.58	-558.694	-229.335	-11.1334	468.5	0.1482	0.14438	0.1326	0.14625
										468.4	-1547.86	-559.115	-231.907	-9.80201	468.4	0.14863	0.14481	0.13301	0.14671
										468.3	-1552.8	-558.163	-232.001	-7.95147	468.3	0.14909	0.14526	0.13339	0.14717
										468.2	-1559.57	-561.701	-232.874	-7.01984	468.2	0.14958	0.1457	0.13382	0.14759
										468.1	-1563.78	-565.203	-233.243	-8.15948	468.1	0.15008	0.14612	0.13422	0.14803
										468	-1567.94	-565.054	-235.368	-5.2136	468	0.15058	0.14652	0.13468	0.14841
										467.9	-1574.92	-568.66	-235.224	-5.62373	467.9	0.15105	0.14699	0.13509	0.14873
										467.8	-1577.45	-572.384	-235.189	-3.89078	467.8	0.15151	0.1474	0.13553	0.14911
										467.7	-1583.74	-575.944	-236.03	-2.66695	467.7	0.1521	0.14791	0.13607	0.14958
										467.6	-1589.73	-579.006	-236.38	-4.41374	467.6	0.15265	0.14833	0.13647	0.14995
										467.5	-1595.93	-580.602	-234.936	-4.86664	467.5	0.15314	0.14881	0.1369	0.15035
										467.4	-1602.42	-583.514	-235.435	-2.52986	467.4	0.15361	0.14929	0.13733	0.15078
										467.3	-1608.76	-585.253	-236.438	-5.41819	467.3	0.15403	0.14983	0.13778	0.1512
										467.2	-1611.1	-588.262	-236.71	-7.37049	467.2	0.15448	0.15026	0.13822	0.15168
										467.1	-1615.43	-592.649	-236.099	-7.67023	467.1	0.15487	0.15071	0.13864	0.15215
										467	-1620	-592.756	-238.644	-4.70936	467	0.15532	0.15114	0.13901	0.15258
										466.9	-1625.58	-595.298	-238.172	-5.03039	466.9	0.15583	0.1515	0.13934	0.15308
										466.8	-1631.25	-596.644	-239.572	-5.25754	466.8	0.1563	0.15195	0.13974	0.15357
										466.7	-1635.17	-600.365	-240.768	-5.73424	466.7	0.1568	0.15238	0.14017	0.15406
										466.6	-1642.75	-602.432	-242.579	-5.73639	466.6	0.15731	0.15291	0.14062	0.15449
										466.5	-1649.75	-607.009	-244.413	-6.7154	466.5	0.1578	0.15349	0.14107	0.15495
										466.4	-1654.48	-610.912	-242.744	-4.70562	466.4	0.15827	0.15407	0.14147	0.15535
										466.3	-1660.89	-613.049	-242.335	-5.45538	466.3	0.15873	0.15461	0.14189	0.15589
										466.2	-1667.63	-616.466	-242.473	-3.08919	466.2	0.1592	0.15509	0.14228	0.15634
										466.1	-1673.76	-619.284	-244.969	-3.86605	466.1	0.15968	0.15553	0.14268	0.15682
										466	-1678.77	-620.611	-245.458	-2.73138	466	0.16016	0.15601	0.14306	0.15729
										465.9	-1683.75	-623.388	-247.577	-2.11869	465.9	0.16057	0.15641	0.14348	0.15774
										465.8	-1689.73	-626.216	-247.196	-1.68887	465.8	0.16098	0.1569	0.14394	0.15815
										465.7	-1693.99	-628.281	-247.516	-2.08221	465.7	0.16136	0.15731	0.14431	0.15856
										465.6	-1698.55	-629.955	-248.471	-0.28347	465.6	0.16174	0.1578	0.14474	0.15906
										465.5	-1705.36	-633.82	-251.761	-1.35608	465.5	0.1622	0.1583	0.14518	0.15958
										465.4	-1710.03	-635.236	-250.846	-0.29548	465.4	0.16265	0.15885	0.14569	0.16017
										465.3	-1715.93	-638.473	-252.157	0.6071	465.3	0.16309	0.15942	0.14612	0.16072
										465.2	-1722.98	-641.714	-250.913	-0.00666	465.2	0.16349	0.15998	0.14659	0.16122
										465.1	-1727.26	-644.027	-249.949	-0.64905	465.1	0.164	0.16051	0.14697	0.16177
										465	-1731.66	-648.697	-247.962	-2.01688	465	0.16447	0.16101	0.14737	0.16231
										464.9	-1736.7	-649.821	-249.891	-3.11742	464.9	0.16492	0.16156	0.14782	0.16281
										464.8	-1742.24	-651.098	-251.087	-1.68454	464.8	0.16538	0.16205	0.1482	0.16333
										464.7	-1748.85	-652.397	-250.261	-3.11971	464.7	0.16594	0.16254	0.14862	0.16389
										464.6	-1757.33	-654.643	-253.706	-2.83437	464.6	0.16647	0.16302	0.149	0.16442
										464.5	-1764.21	-656.443	-254.185	-3.08349	464.5	0.16703	0.16346	0.14943	0.16488
										464.4	-1770.04	-660.283	-255.521	0.23762	464.4	0.1675	0.16396	0.14987	0.16532
										464.3	-1775.87	-659.92	-258.477	-1.42726	464.3	0.16794	0.16441	0.1504	0.16584
										464.2	-1778.64	-661.55	-260.606	1.10592	464.2	0.16833	0.16494	0.1509	0.16639
										464.1	-1781.68	-664.106	-261.181	-0.27024	464.1	0.16873	0.16534	0.15137	0.16701
										464	-1785.39	-663.849	-262.725	-0.46373	464	0.16918	0.16576	0.1518	0.16752
										463.9	-1788.84	-663.35	-263.448	0.71722	463.9	0.16955	0.16609	0.15207	0.16791
										463.8	-1795.21	-665.143	-264.871	0.73639	463.8	0.17008	0.16657	0.1525	0.16842
										463.7	-1801.98	-666.293	-265.466	-0.26769	463.7	0.17058	0.16704	0.15293	0.16894
										463.6	-1807.43	-671.31	-267.895	0.83309	463.6	0.17112	0.16755	0.15342	0.1694
										463.5	-1814.42	-670.886	-266.856	-0.89883	463.5	0.1717	0.16799	0.15391	0.16988
										463.4	-1823.67	-673.45	-267.661	0.26941	463.4	0.17231	0.16851	0.15441	0.1703
										463.3	-1829.57	-674.005	-270.21	-1.94877	463.3	0.17286	0.16898	0.15481	0.17074
										463.2	-1836.21	-676.247	-270.861	-3.28302	463.2	0.17339	0.16935	0.1553	0.17119
										463.1	-1841.34	-678.515	-273.433	-4.22141	463.1	0.1739	0.16974	0.15582	0.17162
										463	-1848.69	-680.87	-274.855	-4.51732	463	0.17446	0.17024	0.15626	0.17211
										462.9	-1853.27	-681.26	-277.272	-6.12697	462.9	0.17496	0.17074	0.15673	0.17253
										462.8	-1856.54	-684.117	-278.464	-5.2177	462.8	0.17536	0.1711	0.15709	0.17292
										462.7	-1861.41	-684.142	-277.119	-5.23702	462.7	0.17577	0.17156	0.15762	0.17332
										462.6	-1864.57	-685.173	-277.049	-3.52176	462.6	0.17618	0.17206	0.15814	0.17383
										462.5	-1868.49	-686.579	-278.928	-0.74728	462.5	0.17664	0.17258	0.1586	0.17434
										462.4	-1874.91	-688.765	-281.2	-2.22454	462.4	0.17717	0.17312	0.15907	0.17492
										462.3	-1882.56	-690.508	-282.029	-0.7214	462.3	0.17776	0.17369	0.15954	0.17547
										462.2	-1888.26	-694.239	-283.418	-1.45912	462.2	0.17839	0.17422	0.16003	0.17604
										462.1	-1893.87	-697.417	-283.092	-1.7531	462.1	0.17893	0.17474	0.16047	0.17653
										462	-1900.2	-698.809	-284.355	-0.0534	462	0.1795	0.17525	0.16091	0.17695
										461.9	-1905.89	-697.888	-284.753	-1.95021	461.9	0.18005	0.17574	0.16138	0.17744
										461.8	-1911.93	-701.387	-288.125	2.37803	461.8	0.18064	0.17621	0.16183	0.17787
										461.7	-1918.13	-703.491	-287.534	4.04889	461.7	0.18116	0.17663	0.16234	0.17836
										461.6	-1922.95	-702.741	-286.879	5.82015	461.6	0.1817	0.17706	0.16279	0.17879
										461.5	-1930.55	-705.635	-287.731	6.92904	461.5	0.18225	0.17746	0.16333	0.17928
										461.4	-1935.93	-707.042	-288.357	7.70951	461.4	0.18262	0.17787	0.16372	0.17961
										461.3	-1942.19	-711.815	-288.067	8.44725	461.3	0.18308	0.17843	0.1642	0.1801
										461.2	-1946.05	-713.907	-287.89	8.42974	461.2	0.18356	0.17898	0.16471	0.18069
										461.1	-1951.48	-715.215	-290.255	8.42691	461.1	0.18398	0.17958	0.16519	0.18136
										461	-1957.41	-715.085	-293.463	4.85245	461	0.18454	0.18013	0.16561	0.18204
										460.9	-1964.61	-717.58	-295.827	7.4069	460.9	0.18507	0.1807	0.16599	0.1826
										460.8	-1972.7	-721.471	-297.637	6.40947	460.8	0.18565	0.18112	0.16642	0.1831
										460.7	-1980.12	-723.39	-298.59	7.17895	460.7	0.18621	0.18166	0.16679	0.18352
										460.6	-1986.27	-726.059	-298.497	6.6717	460.6	0.18668	0.18222	0.16719	0.18402
										460.5	-1988.84	-727.083	-299.952	5.68749	460.5	0.18711	0.18271	0.16776	0.18456
										460.4	-1993.15	-729.081	-299.584	6.43566	460.4	0.18754	0.18314	0.16822	0.1851
										460.3	-1999	-731.989	-303.088	7.12307	460.3	0.1881	0.18359	0.16875	0.18566
										460.2	-2002.83	-734.062	-302.621	7.29944	460.2	0.18847	0.18407	0.16925	0.18614
										460.1	-2007.73	-738.865	-305.545	6.55663	460.1	0.18897	0.18456	0.16974	0.18656
										460	-2010.11	-740.828	-307.631	8.27211	460	0.18945	0.18511	0.17025	0.187
										459.9	-2014.89	-742.466	-306.506	9.52352	459.9	0.18986	0.18573	0.17075	0.18744
										459.8	-2018.6	-746.346	-307.98	7.48066	459.8	0.19039	0.18635	0.17126	0.18794
										459.7	-2027.15	-748.389	-308.377	9.28972	459.7	0.19093	0.1869	0.17168	0.1884
										459.6	-2031.68	-753.814	-308.952	10.8399	459.6	0.19143	0.18744	0.17213	0.18892
										459.5	-2036.5	-755.184	-310.313	8.49234	459.5	0.19194	0.18801	0.17257	0.18949
										459.4	-2043.69	-757.366	-311.934	5.58196	459.4	0.19254	0.18856	0.17302	0.19008
										459.3	-2050.22	-760.551	-312.29	5.25664	459.3	0.19315	0.18915	0.17348	0.19069
										459.2	-2058.83	-764.761	-313.931	1.82021	459.2	0.1938	0.18966	0.17395	0.19123
										459.1	-2065.63	-767.636	-312.616	2.32089	459.1	0.19436	0.19017	0.1745	0.19176
										459	-2070.55	-769.614	-311.587	0.56188	459	0.19487	0.19071	0.175	0.19229
										458.9	-2075.5	-772.355	-312.217	1.8647	458.9	0.19545	0.19134	0.17566	0.1929
										458.8	-2080.1	-775.592	-312.319	0.50298	458.8	0.19592	0.19186	0.17621	0.19338
										458.7	-2086.34	-776.837	-313.962	-1.3147	458.7	0.19644	0.19234	0.17673	0.19389
										458.6	-2091.8	-782.47	-314.261	0.03009	458.6	0.19703	0.19279	0.17728	0.19438
										458.5	-2099.33	-786.5	-315.415	-2.1506	458.5	0.19757	0.19328	0.17777	0.19491
										458.4	-2106.37	-785.343	-317.369	-3.11122	458.4	0.1982	0.19384	0.17826	0.1955
										458.3	-2114.44	-789.928	-320.474	-1.77891	458.3	0.19879	0.19438	0.17872	0.19609
										458.2	-2120.74	-791.062	-323.281	-0.05955	458.2	0.1994	0.19497	0.17921	0.1967
										458.1	-2126.11	-795.227	-324.011	-2.26961	458.1	0.19997	0.19552	0.17968	0.19729
										458	-2131.03	-797.997	-325.753	-2.47461	458	0.20057	0.19609	0.18018	0.19781
										457.9	-2137.14	-799.451	-327.05	-5.59648	457.9	0.20117	0.19664	0.18064	0.19828
										457.8	-2141.57	-801.991	-327.128	-5.76389	457.8	0.20173	0.19716	0.18112	0.19864
										457.7	-2147.26	-805.579	-326.559	-6.40396	457.7	0.20222	0.1977	0.18158	0.19908
										457.6	-2154.86	-807.396	-323.591	-7.19722	457.6	0.20289	0.1983	0.18217	0.19971
										457.5	-2159.74	-808.695	-322.994	-7.61357	457.5	0.20341	0.19887	0.18263	0.20025
										457.4	-2166.29	-810.871	-322.839	-7.91059	457.4	0.20403	0.19938	0.1832	0.20085
										457.3	-2173.45	-814.169	-325.015	-8.45882	457.3	0.2047	0.19996	0.18375	0.20137
										457.2	-2183.52	-819.579	-324.922	-7.31181	457.2	0.20541	0.20051	0.18429	0.20192
										457.1	-2190.18	-820.706	-326.084	-9.25721	457.1	0.2061	0.20122	0.18478	0.20248
										457	-2199.03	-823.681	-326.407	-8.7806	457	0.20674	0.20191	0.1853	0.20306
										456.9	-2206.32	-825.086	-326.995	-9.44548	456.9	0.20743	0.20259	0.18573	0.20364
										456.8	-2214.32	-827.489	-327.24	-10.2037	456.8	0.20805	0.20326	0.18607	0.20437
										456.7	-2220.66	-829.752	-328.947	-11.4441	456.7	0.20866	0.20386	0.18642	0.20506
										456.6	-2230.13	-831.516	-329.319	-10.1307	456.6	0.20939	0.20446	0.18692	0.20583
										456.5	-2235.75	-832.071	-330.328	-8.48631	456.5	0.20994	0.20496	0.18728	0.20639
										456.4	-2240.28	-833.478	-330.318	-8.28055	456.4	0.21044	0.20535	0.18773	0.20701
										456.3	-2244.34	-832.191	-330.284	-9.52229	456.3	0.21096	0.20574	0.18821	0.20758
										456.2	-2251.28	-835.469	-330.894	-10.9261	456.2	0.21147	0.20622	0.18872	0.2081
										456.1	-2256.16	-838.028	-331.854	-6.75017	456.1	0.21197	0.20667	0.18924	0.20857
										456	-2262.08	-841.36	-330.392	-4.01816	456	0.2125	0.20724	0.18973	0.20911
										455.9	-2271.71	-846.041	-333.332	-1.9716	455.9	0.21319	0.208	0.1903	0.20987
										455.8	-2281.32	-847.185	-335.978	-2.74004	455.8	0.21377	0.20862	0.19072	0.21049
										455.7	-2287.86	-850.331	-337.626	-0.27799	455.7	0.21443	0.20922	0.19111	0.21109
										455.6	-2295	-853.982	-337.498	-1.97064	455.6	0.21509	0.20983	0.1916	0.21174
										455.5	-2301.44	-855.457	-338.528	-2.38821	455.5	0.21569	0.21038	0.19208	0.21239
										455.4	-2310.62	-855.855	-340.64	-0.04662	455.4	0.21626	0.21088	0.19262	0.21309
										455.3	-2318.39	-859.696	-343.272	1.01408	455.3	0.21685	0.21145	0.19315	0.21374
										455.2	-2325.87	-865.688	-342.725	1.57833	455.2	0.21749	0.21212	0.19386	0.21451
										455.1	-2332.61	-869.125	-343.867	-0.25274	455.1	0.21798	0.21268	0.19443	0.21499
										455	-2335.54	-872.895	-344.948	-1.38525	455	0.21839	0.21331	0.19498	0.21546
										454.9	-2340.2	-873.964	-346.805	-1.80785	454.9	0.21884	0.21388	0.1955	0.21596
										454.8	-2344.55	-875.709	-348.83	-0.50087	454.8	0.21929	0.21444	0.19597	0.2164
										454.7	-2350.54	-879.519	-350.759	3.20854	454.7	0.2198	0.21497	0.19653	0.2169
										454.6	-2357.16	-885.028	-350.397	4.27534	454.6	0.22035	0.21553	0.19705	0.21757
										454.5	-2365.67	-885.53	-351.172	6.78953	454.5	0.22103	0.21604	0.19756	0.21829
										454.4	-2374.78	-889.462	-354.192	7.24135	454.4	0.22185	0.21679	0.1983	0.21905
										454.3	-2382.34	-893.069	-355.694	4.14199	454.3	0.22255	0.21737	0.1989	0.2197
										454.2	-2390.14	-894.889	-356.788	8.10979	454.2	0.22325	0.21802	0.19956	0.22033
										454.1	-2398.99	-900.36	-355.392	9.18885	454.1	0.2239	0.21863	0.20006	0.22098
										454	-2408.47	-900.711	-355.296	11.0507	454	0.22455	0.21922	0.2006	0.22159
										453.9	-2416.11	-901.727	-357.138	10.5741	453.9	0.2251	0.21979	0.20113	0.22219
										453.8	-2421.35	-902.584	-357.894	9.08326	453.8	0.22559	0.22031	0.2016	0.22276
										453.7	-2428.63	-906.294	-358.974	8.4729	453.7	0.22622	0.22093	0.20228	0.22346
										453.6	-2434.05	-909.749	-361.685	11.6105	453.6	0.22674	0.22141	0.20291	0.22395
										453.5	-2441.09	-912.118	-362.297	9.1589	453.5	0.22723	0.22191	0.20362	0.22445
										453.4	-2447.95	-913.956	-362.47	7.22913	453.4	0.22776	0.22248	0.2043	0.22499
										453.3	-2454.45	-917.824	-365.408	9.31931	453.3	0.22833	0.2231	0.20498	0.22556
										453.2	-2463.06	-921.576	-367.548	10.1879	453.2	0.22895	0.22385	0.20555	0.22609
										453.1	-2471.82	-928.539	-367.568	8.84283	453.1	0.22962	0.22459	0.20618	0.22669
										453	-2481.94	-930.885	-369.559	12.6081	453	0.23034	0.22533	0.2068	0.22735
										452.9	-2491.52	-933.498	-370.857	12.6536	452.9	0.23105	0.22598	0.20733	0.22808
										452.8	-2500.46	-936.66	-375.138	7.3982	452.8	0.23188	0.22683	0.20807	0.22889
										452.7	-2507.19	-940.665	-377.09	5.30368	452.7	0.2325	0.22747	0.20861	0.22958
										452.6	-2509.57	-946.72	-375.663	5.63541	452.6	0.23303	0.22806	0.20924	0.23018
										452.5	-2518.99	-949.773	-378.99	3.95726	452.5	0.2336	0.22867	0.20993	0.23078
										452.4	-2525.74	-952.874	-379.443	5.78074	452.4	0.23416	0.22931	0.21055	0.23135
										452.3	-2532.58	-954.9	-379.863	4.99804	452.3	0.23465	0.22996	0.21118	0.23187
										452.2	-2536.08	-960.659	-381.99	5.33251	452.2	0.23522	0.23066	0.21171	0.23233
										452.1	-2541.07	-964.414	-382.402	3.42618	452.1	0.23576	0.23133	0.21222	0.23281
										452	-2547.94	-967.368	-383.687	4.41052	452	0.23635	0.23202	0.21275	0.23331
										451.9	-2554.26	-968.308	-385.035	3.06192	451.9	0.23697	0.23259	0.21322	0.23388
										451.8	-2562.51	-973.697	-385.042	3.64165	451.8	0.23766	0.23318	0.21369	0.23446
										451.7	-2570.63	-975.183	-387.345	4.21566	451.7	0.23845	0.23378	0.21418	0.23511
										451.6	-2579.31	-982.508	-388.935	4.82676	451.6	0.23914	0.23448	0.21474	0.23578
										451.5	-2587.55	-985.068	-387.3	4.12942	451.5	0.23979	0.23515	0.21535	0.23648
										451.4	-2592.96	-984.466	-388.377	0.86906	451.4	0.24038	0.23587	0.21593	0.23717
										451.3	-2601.99	-988.752	-388.075	2.36706	451.3	0.24096	0.23654	0.21656	0.23778
										451.2	-2607.93	-993.084	-390.408	0.72948	451.2	0.24151	0.2372	0.21719	0.23835
										451.1	-2616.02	-996.848	-393.478	5.78505	451.1	0.24216	0.23784	0.21774	0.23887
										451	-2623.29	-999.231	-395.9	3.02228	451	0.24276	0.23844	0.21832	0.23939
										450.9	-2630.07	-1002.55	-396.397	0.92242	450.9	0.24337	0.239	0.2188	0.23985
										450.8	-2636.18	-1005	-397.512	0.96175	450.8	0.24393	0.23956	0.21933	0.24036
										450.7	-2641.88	-1008.42	-398.33	-1.25027	450.7	0.24455	0.24021	0.21984	0.24087
										450.6	-2648.65	-1016.12	-398.993	-1.49945	450.6	0.24525	0.24081	0.22041	0.24146
										450.5	-2658.47	-1019.56	-401.276	0.83963	450.5	0.24599	0.24141	0.22103	0.24206
										450.4	-2670.36	-1023.21	-405.375	-0.01884	450.4	0.24681	0.24216	0.2216	0.24281
										450.3	-2677.9	-1027.17	-405.898	0.384	450.3	0.2475	0.24289	0.22219	0.24357
										450.2	-2685.71	-1034.05	-405.202	5.83884	450.2	0.24819	0.24363	0.2227	0.24435
										450.1	-2694.03	-1038.07	-406.669	6.26688	450.1	0.24888	0.24427	0.22318	0.24523
										450	-2699.94	-1044.3	-409.032	7.69908	450	0.24953	0.24495	0.22377	0.24601
										449.9	-2707.81	-1045.38	-409.785	6.58199	449.9	0.25011	0.24555	0.22438	0.24683
										449.8	-2715.37	-1047.27	-413.86	7.109	449.8	0.25069	0.24609	0.22494	0.24741
										449.7	-2720.61	-1050.01	-416.315	6.34717	449.7	0.25126	0.2467	0.22549	0.24796
										449.6	-2728.29	-1053.3	-417.971	7.815	449.6	0.25176	0.24727	0.22606	0.2485
										449.5	-2735.42	-1055.6	-418.96	7.37888	449.5	0.25236	0.2479	0.22664	0.24911
										449.4	-2740.81	-1061.31	-419.98	8.31321	449.4	0.25303	0.24841	0.22725	0.24974
										449.3	-2749.93	-1061.68	-420.799	5.93473	449.3	0.25369	0.24901	0.22778	0.25028
										449.2	-2757.61	-1066.39	-420.728	5.57992	449.2	0.25444	0.24957	0.22835	0.25095
										449.1	-2765.58	-1071.28	-424.505	4.6278	449.1	0.25508	0.2502	0.2289	0.25163
										449	-2770.81	-1073.19	-426.737	5.24379	449	0.25585	0.25084	0.22941	0.25249
										448.9	-2780.03	-1077.16	-428.196	2.2474	448.9	0.25655	0.25157	0.22999	0.25318
										448.8	-2789.85	-1079.97	-430.213	4.84393	448.8	0.25728	0.25232	0.23057	0.25395
										448.7	-2796.48	-1085.66	-429.618	5.38091	448.7	0.25796	0.253	0.23112	0.25468
										448.6	-2805.53	-1091.19	-433.3	6.82876	448.6	0.25864	0.25374	0.23179	0.2554
										448.5	-2810.76	-1094.64	-432.81	4.09403	448.5	0.25928	0.25452	0.23252	0.25617
										448.4	-2818.79	-1099.05	-432.384	3.00855	448.4	0.25982	0.25525	0.23324	0.25691
										448.3	-2825.15	-1100.14	-432.503	6.1237	448.3	0.26037	0.25592	0.23389	0.25764
										448.2	-2831.3	-1104.02	-431.424	3.76209	448.2	0.26102	0.25659	0.23453	0.25836
										448.1	-2839.53	-1109.2	-435.774	5.85273	448.1	0.26175	0.25711	0.23518	0.25909
										448	-2847.44	-1113.56	-438.813	7.07036	448	0.26249	0.25777	0.23582	0.25981
										447.9	-2854.68	-1112.68	-440.504	6.77842	447.9	0.26329	0.25848	0.23641	0.26068
										447.8	-2864.2	-1115.66	-439.064	3.81991	447.8	0.26399	0.25919	0.23707	0.26152
										447.7	-2872.03	-1120.81	-445.081	-0.33741	447.7	0.26474	0.25992	0.23773	0.26238
										447.6	-2877.86	-1122.13	-448.276	1.36772	447.6	0.26543	0.26068	0.23831	0.26323
										447.5	-2884.96	-1128.34	-451.092	2.74526	447.5	0.26614	0.26151	0.23894	0.26407
										447.4	-2892.15	-1131.77	-452.424	0.68424	447.4	0.26679	0.26232	0.23962	0.26485
										447.3	-2898.04	-1134.73	-453.762	1.83308	447.3	0.26738	0.26311	0.2404	0.26557
										447.2	-2902.75	-1137.1	-456.366	2.97051	447.2	0.26786	0.26395	0.24117	0.26641
										447.1	-2907.47	-1141.48	-457.397	5.81394	447.1	0.26843	0.26492	0.2422	0.2673
										447	-2914.72	-1146.3	-458.417	5.38009	447	0.26899	0.2657	0.24292	0.26791
										446.9	-2922.08	-1146.81	-462.324	2.7399	446.9	0.26965	0.26642	0.2437	0.26855
										446.8	-2929.79	-1148.31	-465.179	5.06214	446.8	0.27033	0.26711	0.24446	0.26909
										446.7	-2940	-1149.72	-465.444	2.14879	446.7	0.27106	0.26766	0.24513	0.26975
										446.6	-2945.6	-1154.8	-464.741	2.00054	446.6	0.27188	0.26826	0.24584	0.27045
										446.5	-2955.18	-1159.33	-463.738	2.63999	446.5	0.27269	0.26896	0.24662	0.27137
										446.4	-2965.68	-1164.07	-463.087	0.66592	446.4	0.27352	0.26968	0.2473	0.27234
										446.3	-2974.61	-1166.49	-465.392	-0.30518	446.3	0.27438	0.27055	0.24793	0.27322
										446.2	-2982.27	-1171.7	-467.028	2.1712	446.2	0.27522	0.27131	0.24858	0.27411
										446.1	-2992.37	-1173.12	-468.88	4.43398	446.1	0.27602	0.27221	0.2492	0.2749
										446	-3003.58	-1176.05	-469.609	3.32981	446	0.27687	0.27308	0.24982	0.27574
										445.9	-3011.42	-1180.53	-470.636	4.22551	445.9	0.27767	0.27395	0.25047	0.27649
										445.8	-3020.5	-1184.09	-470.376	4.84824	445.8	0.2785	0.27474	0.25112	0.27723
										445.7	-3030.87	-1188.59	-470.933	3.89939	445.7	0.2792	0.27546	0.25191	0.27784
										445.6	-3038.01	-1191.09	-472.731	4.08764	445.6	0.27995	0.27609	0.25261	0.27858
										445.5	-3046.62	-1195.51	-474.766	3.39125	445.5	0.28065	0.27668	0.25347	0.27934
										445.4	-3054.23	-1198.05	-478.041	0.00735	445.4	0.28139	0.27739	0.25427	0.28005
										445.3	-3062.66	-1202.33	-477.832	2.5785	445.3	0.28214	0.27817	0.25497	0.28088
										445.2	-3073.6	-1202.94	-482.541	0.47307	445.2	0.28301	0.27891	0.2557	0.28162
										445.1	-3083.93	-1207.32	-483.189	1.01604	445.1	0.284	0.27967	0.25643	0.28245
										445	-3093.46	-1208.9	-485.536	-3.42686	445	0.28491	0.28042	0.25718	0.28324
										444.9	-3106.93	-1213.94	-489.962	-2.30742	444.9	0.28583	0.28122	0.25794	0.28411
										444.8	-3115.56	-1216.31	-490.327	-0.33159	444.8	0.28663	0.28204	0.25871	0.28497
										444.7	-3121.28	-1219.5	-492.011	-2.6307	444.7	0.28732	0.28273	0.25935	0.28585
										444.6	-3127.76	-1224.4	-493.354	-0.38948	444.6	0.28802	0.28337	0.25994	0.2866
										444.5	-3135.68	-1229.55	-496.326	0.44054	444.5	0.28879	0.28408	0.26056	0.28725
										444.4	-3144.25	-1231.8	-493.288	5.37136	444.4	0.28952	0.28483	0.26115	0.28788
										444.3	-3151.96	-1235.47	-496.926	5.57998	444.3	0.29022	0.28564	0.26194	0.28844
										444.2	-3160.4	-1240.62	-499.397	4.33464	444.2	0.29106	0.28643	0.26273	0.28903
										444.1	-3171.59	-1243.26	-499.538	5.70881	444.1	0.29188	0.28724	0.26357	0.2897
										444	-3182.95	-1248.28	-501.153	4.95886	444	0.29272	0.28817	0.26431	0.29047
										443.9	-3193.92	-1253.54	-503.179	5.03069	443.9	0.29362	0.28898	0.26501	0.29125
										443.8	-3200.91	-1257.98	-504.894	0.47458	443.8	0.29461	0.28982	0.26564	0.29208
										443.7	-3210.15	-1262.51	-506.641	-0.02408	443.7	0.29554	0.29058	0.26632	0.29304
										443.6	-3217.77	-1265.63	-506.982	-0.89971	443.6	0.29649	0.29153	0.26698	0.29396
										443.5	-3225.09	-1267.67	-508.346	2.60786	443.5	0.29707	0.2922	0.26753	0.2947
										443.4	-3233.07	-1275.54	-509.647	1.13914	443.4	0.29792	0.29316	0.26824	0.29567
										443.3	-3241.8	-1278.6	-511.258	-1.54386	443.3	0.29868	0.29413	0.26899	0.29662
										443.2	-3248.29	-1284.52	-513.274	1.21748	443.2	0.29941	0.29504	0.26965	0.29743
										443.1	-3254.11	-1287.84	-518.026	1.5034	443.1	0.30015	0.29589	0.27036	0.29819
										443	-3262.69	-1292.67	-521.215	2.74848	443	0.30088	0.29675	0.2711	0.29893
										442.9	-3268.97	-1297.61	-522.603	1.36818	442.9	0.3016	0.29755	0.27194	0.29971
										442.8	-3274.17	-1301.5	-524.531	0.24035	442.8	0.30229	0.29835	0.27272	0.30039
										442.7	-3281.22	-1310.22	-528.604	-1.76694	442.7	0.30298	0.29919	0.27353	0.30113
										442.6	-3286.53	-1313.72	-529.884	-0.43927	442.6	0.30354	0.29978	0.27409	0.30169
										442.5	-3296.61	-1314.87	-532.607	-1.73457	442.5	0.30424	0.30059	0.27478	0.30242
										442.4	-3306.14	-1319.93	-531.052	-2.05818	442.4	0.30504	0.30147	0.27545	0.30331
										442.3	-3314.98	-1323.52	-533.606	-0.88048	442.3	0.30592	0.30235	0.27602	0.30418
										442.2	-3326.64	-1333.1	-536.501	1.38149	442.2	0.30678	0.30333	0.27666	0.30506
										442.1	-3333.19	-1336.4	-536.743	1.76894	442.1	0.30768	0.30417	0.27729	0.30605
										442	-3342.02	-1338.15	-536.346	3.16653	442	0.30841	0.30474	0.2778	0.30677
										441.9	-3350.73	-1342.62	-538.097	0.0159	441.9	0.30934	0.30546	0.27847	0.3077
										441.8	-3360.3	-1350.4	-536.245	1.49133	441.8	0.31026	0.30614	0.27909	0.30856
										441.7	-3368.93	-1352.27	-538.833	2.58126	441.7	0.31104	0.30678	0.27981	0.30943
										441.6	-3379.59	-1361.05	-539.552	3.91323	441.6	0.31185	0.30747	0.28058	0.31022
										441.5	-3386.94	-1362.79	-540.013	3.86483	441.5	0.31261	0.30826	0.28124	0.31098
										441.4	-3397.27	-1368.52	-540.664	4.67844	441.4	0.31344	0.30916	0.282	0.31168
										441.3	-3405.99	-1375.62	-540.578	8.6405	441.3	0.31415	0.30988	0.28258	0.31225
										441.2	-3419.58	-1382.77	-541.615	2.01938	441.2	0.31507	0.31091	0.2834	0.31302
										441.1	-3430.67	-1387.82	-540.563	3.7719	441.1	0.31596	0.31181	0.28422	0.31393
										441	-3441.89	-1389.47	-544.406	4.70767	441	0.31686	0.31272	0.28512	0.31489
										440.9	-3452.03	-1394.77	-546.124	-0.37323	440.9	0.31781	0.31358	0.28588	0.31603
										440.8	-3460.84	-1399.84	-545.763	1.02429	440.8	0.31846	0.31424	0.28649	0.3169
										440.7	-3470.66	-1404.11	-550.52	-0.20015	440.7	0.31927	0.31504	0.28729	0.31804
										440.6	-3479.23	-1410.96	-554.591	3.13624	440.6	0.32011	0.31582	0.28801	0.319
										440.5	-3484.45	-1417.12	-556.492	5.07197	440.5	0.32094	0.31644	0.28873	0.31981
										440.4	-3495.04	-1423.58	-561.127	4.09804	440.4	0.32178	0.3171	0.28948	0.32056
										440.3	-3504.71	-1428.58	-561.328	6.35806	440.3	0.32262	0.31769	0.29026	0.32133
										440.2	-3512.65	-1431.28	-561.749	3.63504	440.2	0.32324	0.31825	0.29082	0.32179
										440.1	-3523.8	-1435.11	-564.248	3.24578	440.1	0.32404	0.31895	0.29167	0.32248
										440	-3535.18	-1437.02	-566.902	3.52942	440	0.32495	0.31971	0.29246	0.32312
										439.9	-3545.59	-1440.32	-570.022	5.04983	439.9	0.32587	0.32058	0.29325	0.32378
										439.8	-3556.49	-1449.35	-571.663	6.1676	439.8	0.32682	0.32143	0.29396	0.32459
										439.7	-3565.02	-1454.47	-572.384	7.38595	439.7	0.32759	0.32235	0.29463	0.32544
										439.6	-3573.34	-1463.8	-574.793	9.49231	439.6	0.32847	0.32332	0.29539	0.32627
										439.5	-3581.49	-1465.58	-574.823	7.52314	439.5	0.32941	0.32421	0.29605	0.32707
										439.4	-3589.98	-1468.34	-575.563	8.16469	439.4	0.3301	0.32486	0.29654	0.3277
										439.3	-3603.31	-1471.44	-574.917	7.87355	439.3	0.33103	0.3256	0.29738	0.32859
										439.2	-3612.16	-1473.69	-576.471	8.72902	439.2	0.33194	0.3263	0.29824	0.32959
										439.1	-3620.04	-1475.36	-578.907	10.553	439.1	0.3328	0.32703	0.29919	0.33053
										439	-3629.85	-1479.83	-578.247	10.7942	439	0.33367	0.32776	0.30016	0.33133
										438.9	-3637.18	-1480.22	-582.471	9.79084	438.9	0.33453	0.32828	0.30115	0.33212
										438.8	-3648.12	-1482.01	-583.009	11.8283	438.8	0.33529	0.32902	0.30205	0.33285
										438.7	-3658.53	-1485.63	-580.789	11.1161	438.7	0.33613	0.32974	0.30295	0.33364
										438.6	-3667.72	-1489.32	-585.646	10.0235	438.6	0.33689	0.33068	0.30381	0.3344
										438.5	-3676.36	-1496.41	-589.37	11.3614	438.5	0.33759	0.33158	0.30466	0.33518
										438.4	-3682.51	-1500.55	-590.73	14.4219	438.4	0.33824	0.33256	0.30547	0.33605
										438.3	-3688.71	-1504.93	-592.582	14.743	438.3	0.33895	0.33363	0.3062	0.33697
										438.2	-3700.07	-1510.75	-595.681	11.4566	438.2	0.33972	0.33473	0.30683	0.33779
										438.1	-3708.22	-1515.22	-597.307	12.0645	438.1	0.34056	0.33573	0.30747	0.33876
										438	-3712.66	-1519.65	-602.519	8.38478	438	0.34129	0.33641	0.30807	0.33965
										437.9	-3719.1	-1518.49	-606.204	4.53205	437.9	0.34203	0.33711	0.30876	0.34052
										437.8	-3725.28	-1520.9	-608.436	9.9646	437.8	0.34278	0.3377	0.30947	0.34138
										437.7	-3731.79	-1525.79	-612.824	6.70923	437.7	0.34349	0.33844	0.31019	0.34217
										437.6	-3736.42	-1532.56	-613.002	5.57565	437.6	0.34418	0.33918	0.31084	0.34291
										437.5	-3746.2	-1536.39	-610.988	4.69689	437.5	0.34485	0.33982	0.31159	0.34357
										437.4	-3751.11	-1536.31	-611.548	5.76576	437.4	0.34564	0.34041	0.31216	0.34434
										437.3	-3757.56	-1539.41	-612.348	5.20318	437.3	0.34632	0.34109	0.31273	0.34507
										437.2	-3765.77	-1543.73	-613.741	5.26232	437.2	0.34707	0.34188	0.31331	0.34589
										437.1	-3774.98	-1545.53	-613.383	4.58991	437.1	0.34786	0.34273	0.31399	0.34676
										437	-3788.73	-1552.46	-613.325	7.46589	437	0.34897	0.34402	0.3148	0.34784
										436.9	-3796.78	-1559.13	-614.676	8.52795	436.9	0.34975	0.34513	0.31549	0.34875
										436.8	-3802.26	-1565.55	-613.816	10.2253	436.8	0.3505	0.34607	0.31616	0.34965
										436.7	-3802.96	-1573.78	-616.375	10.9385	436.7	0.35117	0.34709	0.31681	0.35048
										436.6	-3810.07	-1580.01	-619.737	9.79239	436.6	0.3518	0.3478	0.31751	0.3513
										436.5	-3815.1	-1577.5	-621.207	4.30591	436.5	0.3524	0.34849	0.3183	0.35198
										436.4	-3823.69	-1579.1	-623.138	4.28843	436.4	0.3531	0.34908	0.31909	0.35265
										436.3	-3828.88	-1585.63	-623.362	2.69515	436.3	0.3537	0.34961	0.31976	0.3533
										436.2	-3839.21	-1592.21	-625.624	1.53717	436.2	0.35426	0.3502	0.32051	0.35405
										436.1	-3847.13	-1596.48	-624.947	-0.88131	436.1	0.35486	0.35082	0.32124	0.35487
										436	-3852.77	-1602.44	-627.652	0.81114	436	0.35551	0.35172	0.32185	0.35558
										435.9	-3862.31	-1607.09	-630.383	-0.54385	435.9	0.35631	0.35264	0.32236	0.35631
										435.8	-3870.99	-1614.59	-633.499	-1.71069	435.8	0.35717	0.35362	0.32293	0.35701
										435.7	-3878.01	-1618.27	-639.163	-3.73601	435.7	0.35794	0.35457	0.32352	0.35782
										435.6	-3885.4	-1627.47	-640.961	-2.89076	435.6	0.35891	0.35588	0.32431	0.35886
										435.5	-3892.27	-1628.72	-644.392	-6.11345	435.5	0.35966	0.3567	0.3251	0.35969
										435.4	-3898.75	-1637.79	-647.026	-8.32058	435.4	0.36046	0.35763	0.32574	0.36048
										435.3	-3904.37	-1642.97	-647.395	-5.25451	435.3	0.36123	0.35838	0.32642	0.36119
										435.2	-3912.3	-1649.11	-650.036	-8.02591	435.2	0.36191	0.35914	0.32708	0.36185
										435.1	-3920.88	-1650.07	-653.487	-5.96458	435.1	0.36249	0.35977	0.32781	0.36252
										435	-3929.45	-1653.34	-656.681	-9.92947	435	0.36319	0.36039	0.32851	0.36313
										434.9	-3932.67	-1655.97	-654.522	-4.27984	434.9	0.36383	0.36101	0.32926	0.36378
										434.8	-3937.15	-1662.63	-655.081	-5.67396	434.8	0.36443	0.36176	0.33004	0.36436
										434.7	-3944.27	-1669.08	-655.706	-7.29072	434.7	0.3651	0.36262	0.33083	0.36506
										434.6	-3950.41	-1676.75	-657.584	-5.18633	434.6	0.36587	0.36351	0.33149	0.36569
										434.5	-3958.51	-1682.84	-659.198	-4.30798	434.5	0.36657	0.36443	0.33216	0.36634
										434.4	-3962.25	-1691.6	-660.117	-3.09147	434.4	0.36726	0.36532	0.33287	0.36695
										434.3	-3970.54	-1693.75	-661.212	-1.95816	434.3	0.36808	0.36622	0.33361	0.36763
										434.2	-3978.22	-1701.64	-664.415	-4.55389	434.2	0.36887	0.36714	0.33433	0.36824
										434.1	-3990.15	-1709.1	-667.152	-5.90119	434.1	0.36967	0.3682	0.33512	0.3689
										434	-3999.16	-1713.01	-668.331	-4.83327	434	0.37053	0.36909	0.3359	0.36954
										433.9	-4006.22	-1718.28	-670.798	-7.01974	433.9	0.37128	0.3699	0.33661	0.37021
										433.8	-4013.7	-1721.56	-677.683	-3.97605	433.8	0.37209	0.37055	0.33731	0.37084
										433.7	-4018.51	-1724.49	-677.979	-2.15301	433.7	0.37282	0.37108	0.33794	0.37144
										433.6	-4025.8	-1725.64	-679.842	-1.64748	433.6	0.37357	0.37151	0.33854	0.37197
										433.5	-4035.64	-1727.61	-680.589	-2.22282	433.5	0.37428	0.372	0.33915	0.37264
										433.4	-4049.1	-1727.52	-681.259	-2.98326	433.4	0.37505	0.37253	0.33978	0.37332
										433.3	-4055.81	-1730.08	-681.526	-2.18992	433.3	0.37575	0.37328	0.34038	0.37403
										433.2	-4066.45	-1736.79	-682.788	1.96472	433.2	0.37653	0.37418	0.34096	0.37476
										433.1	-4074.73	-1744.77	-684.446	2.27964	433.1	0.37734	0.37508	0.34159	0.37557
										433	-4085.24	-1747.93	-687.193	0.89901	433	0.37813	0.37597	0.3423	0.37635
										432.9	-4090.51	-1750.67	-689.388	3.09668	432.9	0.37907	0.37685	0.34293	0.37717
										432.8	-4099.28	-1755.57	-694.193	1.58097	432.8	0.37989	0.37774	0.34355	0.3779
										432.7	-4107.31	-1759.48	-694.079	-0.7995	432.7	0.3807	0.37846	0.34417	0.37868
										432.6	-4112.33	-1762.47	-695.058	-0.42069	432.6	0.38135	0.37907	0.34485	0.37935
										432.5	-4117.75	-1767.25	-695.302	-0.59037	432.5	0.38182	0.37965	0.34543	0.38004
										432.4	-4122.24	-1770.59	-695.345	0.78393	432.4	0.38226	0.38017	0.34608	0.38075
										432.3	-4130.04	-1775.68	-698.098	0.48058	432.3	0.38275	0.38071	0.3467	0.3814
										432.2	-4132.3	-1778.16	-698.955	-3.70789	432.2	0.38317	0.38123	0.34731	0.38201
										432.1	-4138.3	-1781.13	-700.635	0.88261	432.1	0.38369	0.38181	0.3479	0.38253
										432	-4143.84	-1783.65	-703.05	1.92564	432	0.38425	0.38226	0.34847	0.38321
										431.9	-4151.08	-1785.08	-706.439	3.43261	431.9	0.38488	0.38282	0.34906	0.38384
										431.8	-4157.89	-1787.35	-703.292	-0.18302	431.8	0.38575	0.38337	0.34962	0.38438
										431.7	-4163.62	-1792.25	-705.065	-2.842	431.7	0.38662	0.38393	0.35022	0.3849
										431.6	-4175.75	-1797.84	-710.852	-3.93093	431.6	0.38748	0.38445	0.35079	0.38558
										431.5	-4188.92	-1802.55	-713.979	-4.15169	431.5	0.38834	0.38504	0.3513	0.38637
										431.4	-4197.76	-1806.89	-714.742	-4.00361	431.4	0.38919	0.38569	0.35184	0.38716
										431.3	-4206	-1810.4	-717.048	-4.99119	431.3	0.38985	0.38635	0.35247	0.388
										431.2	-4214.67	-1813.31	-719.191	-3.00733	431.2	0.39042	0.38708	0.35318	0.38879
										431.1	-4222.45	-1815.06	-721.18	-3.87281	431.1	0.39098	0.38781	0.35385	0.38966
										431	-4227.33	-1815.74	-720.514	-5.33243	431	0.39143	0.3884	0.35448	0.39039
										430.9	-4233.12	-1819.65	-726.616	-4.91325	430.9	0.39198	0.38892	0.35522	0.39118
										430.8	-4237.54	-1821.32	-726.711	-3.43785	430.8	0.39243	0.38906	0.35574	0.39166
										430.7	-4243.22	-1823.74	-729.791	-3.67703	430.7	0.39288	0.38926	0.35619	0.39208
										430.6	-4246.81	-1828.13	-728.572	-3.56019	430.6	0.39349	0.38959	0.3567	0.39256
										430.5	-4249.65	-1832.69	-728.115	-7.33385	430.5	0.39398	0.38997	0.35717	0.39316
										430.4	-4255.99	-1831.59	-729.911	-10.2623	430.4	0.39448	0.39057	0.35782	0.39373
										430.3	-4260.25	-1832.09	-732.111	-9.49512	430.3	0.39504	0.39113	0.35843	0.39448
										430.2	-4265.07	-1835.51	-736.014	-9.26582	430.2	0.39569	0.39183	0.35899	0.39519
										430.1	-4270.96	-1842.88	-735.471	-8.70581	430.1	0.39632	0.39256	0.35947	0.39595
										430	-4278.57	-1850.72	-735.058	-8.18562	430	0.39692	0.39322	0.36002	0.39659
										429.9	-4282.04	-1857.32	-736.872	-8.2741	429.9	0.39737	0.39388	0.36051	0.39722
										429.8	-4285.41	-1858.05	-737.518	-10.3109	429.8	0.39774	0.39445	0.36085	0.39771
										429.7	-4289.4	-1861.99	-736.73	-7.45173	429.7	0.39808	0.39498	0.36122	0.39823
										429.6	-4292.78	-1864.78	-736.244	-6.37282	429.6	0.39833	0.39536	0.36162	0.39866
										429.5	-4294.05	-1868.06	-736.85	-3.07865	429.5	0.39857	0.39572	0.36218	0.39905
										429.4	-4297.67	-1869.92	-739.036	-0.41188	429.4	0.39895	0.39592	0.36275	0.39956
										429.3	-4301.28	-1876.07	-739.6	0.09136	429.3	0.3993	0.39632	0.3634	0.40003
										429.2	-4306.55	-1877.45	-740.227	-0.84166	429.2	0.39984	0.39669	0.364	0.40062
										429.1	-4311.12	-1882.65	-744.837	0.05195	429.1	0.40045	0.3973	0.36444	0.40118
										429	-4313.32	-1886.42	-747.269	-0.11436	429	0.40105	0.39786	0.36491	0.40172
										428.9	-4320.4	-1891.62	-747.932	2.5305	428.9	0.40163	0.39857	0.36537	0.40238
										428.8	-4328.92	-1898.51	-750.977	3.12358	428.8	0.40234	0.39944	0.36595	0.40317
										428.7	-4330.62	-1903.64	-750.74	1.00804	428.7	0.40288	0.40019	0.36648	0.40379
										428.6	-4338.8	-1906.1	-752.164	1.62053	428.6	0.4034	0.40102	0.36706	0.40447
										428.5	-4341.47	-1913.94	-754.271	1.72991	428.5	0.40372	0.40189	0.36758	0.40515
										428.4	-4343.2	-1914.2	-755.138	3.97878	428.4	0.40401	0.40267	0.36817	0.40588
										428.3	-4341.32	-1918.62	-752.705	6.04868	428.3	0.40429	0.40344	0.36874	0.40634
										428.2	-4341.29	-1921.67	-755.645	4.90683	428.2	0.40461	0.40408	0.3693	0.40673
										428.1	-4344.18	-1923.43	-759.833	1.23969	428.1	0.40492	0.40462	0.36981	0.40705
										428	-4346.48	-1922.98	-759.568	3.1273	428	0.4054	0.40496	0.37028	0.40755
										427.9	-4348.77	-1925.48	-760.147	0.72645	427.9	0.40586	0.40529	0.37075	0.40803
										427.8	-4353.81	-1931.23	-760.159	0.28889	427.8	0.40646	0.40555	0.37124	0.4086
										427.7	-4357.29	-1930.58	-763.119	1.32027	427.7	0.40701	0.40596	0.3717	0.40918
										427.6	-4367.2	-1936.01	-762.931	3.39766	427.6	0.40784	0.40655	0.37228	0.41008
										427.5	-4370.63	-1938.89	-763.041	6.68605	427.5	0.40855	0.40717	0.37279	0.41085
										427.4	-4375.53	-1941.18	-764.209	5.95846	427.4	0.40916	0.40787	0.37327	0.41156
										427.3	-4381.54	-1943.54	-766.81	5.19676	427.3	0.40964	0.40866	0.37383	0.41211
										427.2	-4390.38	-1951.89	-766.917	2.55288	427.2	0.41009	0.40937	0.3743	0.41268
										427.1	-4395.6	-1957.54	-767.708	5.67146	427.1	0.41046	0.41	0.3747	0.41306
										427	-4397.41	-1962.26	-767.725	6.2934	427	0.41077	0.41068	0.37506	0.41357
										426.9	-4397.87	-1967.55	-769.38	7.01999	426.9	0.41094	0.4112	0.37554	0.41393
										426.8	-4398.25	-1966.77	-772.621	5.21733	426.8	0.41125	0.4115	0.37601	0.41433
										426.7	-4398.82	-1968.98	-777.377	6.579	426.7	0.41153	0.41177	0.37653	0.4147
										426.6	-4400.58	-1968.16	-777.343	10.7232	426.6	0.41195	0.41203	0.3771	0.4151
										426.5	-4404.44	-1971.06	-777.437	9.52002	426.5	0.41258	0.4124	0.37793	0.41573
										426.4	-4403.45	-1976.33	-777.226	5.22962	426.4	0.41314	0.41283	0.37854	0.41621
										426.3	-4408.56	-1974.22	-781.309	8.02519	426.3	0.41379	0.41342	0.37912	0.41677
										426.2	-4413.16	-1980.86	-782.363	5.67122	426.2	0.41446	0.41408	0.37964	0.41732
										426.1	-4413.99	-1988.26	-782.117	7.51627	426.1	0.41499	0.41486	0.38008	0.41774
										426	-4419.62	-1991.54	-784.688	8.24547	426	0.41547	0.4156	0.38059	0.41829
										425.9	-4422.27	-1992.67	-787.959	7.57694	425.9	0.41592	0.4163	0.38103	0.41875
										425.8	-4428.82	-1998.88	-788.005	8.22655	425.8	0.41646	0.41698	0.38142	0.41929
										425.7	-4430.23	-2000.06	-787.014	9.88206	425.7	0.41687	0.41755	0.38188	0.41976
										425.6	-4433.78	-2000.36	-786.043	8.88904	425.6	0.4173	0.41802	0.38231	0.42024
										425.5	-4438.53	-2001.52	-786.36	12.2592	425.5	0.41765	0.41835	0.38276	0.4206
										425.4	-4438.97	-2002.22	-788.417	10.8735	425.4	0.4179	0.41869	0.38316	0.42096
										425.3	-4441.01	-1999.66	-792.694	6.96405	425.3	0.41825	0.41883	0.38357	0.42131
										425.2	-4443.71	-2006.96	-794.857	5.30572	425.2	0.41877	0.41888	0.38401	0.42189
										425.1	-4444.74	-2010.4	-796.558	7.45526	425.1	0.41911	0.41908	0.38432	0.42228
										425	-4448.99	-2017.37	-796.506	3.3399	425	0.41956	0.41935	0.38454	0.42274
										424.9	-4453.37	-2022.81	-795.538	5.99807	424.9	0.42005	0.41975	0.38476	0.42314
										424.8	-4458.26	-2025.95	-795.18	10.0229	424.8	0.42068	0.42021	0.38493	0.42359
										424.7	-4461.02	-2032.37	-798.751	7.64429	424.7	0.42115	0.42076	0.38521	0.42384
										424.6	-4467.43	-2035.96	-805.531	8.84896	424.6	0.4216	0.42132	0.38546	0.42407
										424.5	-4470.69	-2043.43	-807.753	11.3702	424.5	0.42189	0.42196	0.38585	0.42435
										424.4	-4471.03	-2049.36	-809.735	12.9253	424.4	0.42203	0.42263	0.38628	0.4247
										424.3	-4472.35	-2051.55	-813.722	11.8717	424.3	0.42215	0.42329	0.38675	0.42501
										424.2	-4467.97	-2055.6	-812.105	7.89925	424.2	0.42211	0.42383	0.3873	0.42539
										424.1	-4466.29	-2059.33	-814.319	8.05138	424.1	0.42215	0.4242	0.38782	0.42589
										424	-4461.17	-2061.26	-815.63	15.9507	424	0.4222	0.42447	0.38835	0.42638
										423.9	-4459.19	-2057.38	-819.367	16.3531	423.9	0.42247	0.42462	0.38878	0.42689
										423.8	-4456.09	-2059.96	-819.168	11.0181	423.8	0.42275	0.42471	0.38919	0.42731
										423.7	-4460.03	-2064.03	-823.323	5.65809	423.7	0.42325	0.42479	0.38953	0.42765
										423.6	-4461.77	-2064.36	-825.58	4.44049	423.6	0.4237	0.42502	0.38979	0.42801
										423.5	-4463.43	-2063.09	-827.85	1.99091	423.5	0.4241	0.42534	0.39017	0.42844
										423.4	-4471.2	-2065.51	-827.578	0.61036	423.4	0.42457	0.42585	0.39043	0.42895
										423.3	-4472.25	-2068.33	-825.227	-2.5927	423.3	0.42492	0.42644	0.39086	0.42938
										423.2	-4474.93	-2072.39	-832.134	1.86697	423.2	0.42532	0.42722	0.39128	0.42988
										423.1	-4479.6	-2077.94	-834.013	1.15019	423.1	0.42554	0.42774	0.39157	0.43032
										423	-4477.32	-2081.25	-835.068	-3.44614	423	0.42559	0.42829	0.39192	0.43061
										422.9	-4479.46	-2081.04	-837.061	-6.01347	422.9	0.42574	0.42862	0.39226	0.43097
										422.8	-4478.74	-2080.95	-841.18	-6.00854	422.8	0.42588	0.42872	0.39264	0.43125
										422.7	-4479.76	-2082.64	-841.115	-4.06114	422.7	0.42621	0.42878	0.39299	0.4316
										422.6	-4482.7	-2082.24	-839.555	-3.54314	422.6	0.42655	0.42878	0.39339	0.432
										422.5	-4481.54	-2083.61	-840.96	-4.74979	422.5	0.42686	0.4288	0.39388	0.43237
										422.4	-4485.14	-2085.22	-842.664	-0.33531	422.4	0.42725	0.42885	0.39422	0.43265
										422.3	-4485.32	-2091.86	-845.413	-0.47268	422.3	0.42753	0.42908	0.39451	0.43296
										422.2	-4484.07	-2090.3	-847.262	-6.57682	422.2	0.42787	0.42939	0.39475	0.43331
										422.1	-4492.98	-2096.98	-849.543	-4.59777	422.1	0.42829	0.42985	0.39509	0.43355
										422	-4492.76	-2102.62	-848.795	-3.72269	422	0.42857	0.43046	0.39544	0.43386
										421.9	-4491.42	-2102.56	-848.355	-0.66088	421.9	0.42877	0.43094	0.39581	0.43402
										421.8	-4494.99	-2105.72	-848.792	-4.61523	421.8	0.429	0.4315	0.39631	0.43441
										421.7	-4495	-2107.93	-850.937	-4.42708	421.7	0.4291	0.43207	0.39703	0.43479
										421.6	-4493.03	-2109.17	-853.646	-3.40477	421.6	0.42917	0.43248	0.39762	0.43523
										421.5	-4495.05	-2115.17	-855.265	-7.9012	421.5	0.42916	0.43286	0.39826	0.43567
										421.4	-4494.93	-2117.28	-853.851	-4.22651	421.4	0.42937	0.43314	0.39869	0.43621
										421.3	-4495.68	-2118.02	-852.391	-7.15957	421.3	0.42969	0.43336	0.39906	0.43672
										421.2	-4497.62	-2115.64	-849.806	-9.33632	421.2	0.43002	0.43358	0.39932	0.43716
										421.1	-4494.52	-2116.05	-853.308	-7.06542	421.1	0.43035	0.43393	0.39967	0.43743
										421	-4493.8	-2118.33	-855.429	-10.0801	421	0.43068	0.43427	0.40004	0.43775
										420.9	-4497.04	-2123.91	-857.409	-11.4064	420.9	0.43105	0.43467	0.40041	0.43797
										420.8	-4500.55	-2128.36	-856.219	-12.244	420.8	0.43151	0.43521	0.40065	0.43816
										420.7	-4505.01	-2130.36	-855.217	-19.0594	420.7	0.43185	0.43576	0.40085	0.43838
										420.6	-4504.15	-2136.64	-855.223	-18.7407	420.6	0.43206	0.43633	0.40115	0.43858
										420.5	-4505.39	-2138.12	-858.803	-18.0328	420.5	0.43222	0.43664	0.40149	0.43888
										420.4	-4504.4	-2143.84	-858.768	-12.769	420.4	0.43243	0.43722	0.40193	0.43917
										420.3	-4505.01	-2147.01	-857.778	-9.40618	420.3	0.43254	0.43777	0.40234	0.43947
										420.2	-4507.56	-2152.45	-859.9	-6.98867	420.2	0.43284	0.43817	0.40278	0.43979
										420.1	-4506.46	-2154.2	-859.641	-5.52542	420.1	0.43306	0.43845	0.40315	0.44007
										420	-4508.06	-2156.78	-861.865	-3.56084	420	0.43334	0.43861	0.40353	0.44046
										419.9	-4510.36	-2156.27	-862.335	-4.01838	419.9	0.43375	0.43867	0.40381	0.44092
										419.8	-4510.83	-2161.21	-863.384	-4.38293	419.8	0.43402	0.43872	0.40401	0.44134
										419.7	-4513.07	-2164.07	-865.796	-4.5344	419.7	0.43445	0.43869	0.40407	0.44169
										419.6	-4516.46	-2167.23	-866.076	-4.58768	419.6	0.4347	0.43876	0.40406	0.44195
										419.5	-4516.83	-2172.17	-864.663	-1.57503	419.5	0.43506	0.43888	0.40404	0.44233
										419.4	-4520.73	-2177.92	-861.54	-2.60531	419.4	0.43541	0.43937	0.40409	0.44267
										419.3	-4522.62	-2178.35	-862.75	-2.23288	419.3	0.43571	0.43983	0.40419	0.44298
										419.2	-4521.84	-2182.69	-864.841	-2.98748	419.2	0.43583	0.44042	0.40444	0.44315
										419.1	-4523.58	-2180.48	-867.666	-3.27627	419.1	0.43601	0.44094	0.4046	0.44348
										419	-4520.31	-2187.06	-871.152	-4.29574	419	0.43607	0.44144	0.40486	0.44396
										418.9	-4517.41	-2187.78	-876.499	-4.02514	418.9	0.43621	0.44188	0.40516	0.44444
										418.8	-4511.8	-2193.13	-875.827	-1.54063	418.8	0.43628	0.44222	0.40547	0.44489
										418.7	-4507.63	-2192.2	-875.21	0.97387	418.7	0.4363	0.44241	0.40564	0.44531
										418.6	-4505.8	-2194.79	-876.29	-0.05244	418.6	0.43641	0.44278	0.40594	0.44577
										418.5	-4508.92	-2199.91	-877.346	0.01307	418.5	0.43664	0.44302	0.4061	0.44613
										418.4	-4509.77	-2200.08	-878.281	5.36224	418.4	0.43692	0.44326	0.40625	0.44628
										418.3	-4512.2	-2200	-877.695	7.72073	418.3	0.43736	0.44338	0.40623	0.44644
										418.2	-4518.63	-2199.49	-880.236	7.37318	418.2	0.43777	0.44352	0.40634	0.44662
										418.1	-4519.05	-2195.33	-881.126	9.80073	418.1	0.43812	0.4437	0.40641	0.4467
										418	-4519.72	-2195.55	-881.853	7.34758	418	0.43828	0.4439	0.40659	0.44681
										417.9	-4518.54	-2198.25	-885.379	8.91038	417.9	0.43837	0.44428	0.40688	0.44696
										417.8	-4515.13	-2204.12	-886.503	12.1929	417.8	0.43842	0.44456	0.40704	0.4473
										417.7	-4516.71	-2207.4	-885.804	8.41217	417.7	0.43855	0.44484	0.40722	0.44777
										417.6	-4515.92	-2207.67	-884.857	8.81135	417.6	0.43881	0.44499	0.40729	0.44824
										417.5	-4515.56	-2206.84	-886.855	11.992	417.5	0.43903	0.44519	0.4074	0.44877
										417.4	-4517.42	-2206.22	-890.809	14.5773	417.4	0.43933	0.44529	0.40762	0.44915
										417.3	-4521.79	-2206.94	-891.105	17.1334	417.3	0.43962	0.44535	0.40792	0.44957
										417.2	-4525.36	-2205.33	-894.454	14.2778	417.2	0.43992	0.44551	0.40816	0.44984
										417.1	-4529.38	-2203.74	-895.066	11.4315	417.1	0.44019	0.44566	0.40835	0.45004
										417	-4530.4	-2203.81	-898.512	5.31106	417	0.44044	0.44589	0.40857	0.45029
										416.9	-4533.35	-2200.98	-898.134	8.44981	416.9	0.4408	0.4461	0.40892	0.4506
										416.8	-4531.42	-2205.56	-902.266	6.61639	416.8	0.44107	0.4463	0.40913	0.4509
										416.7	-4531.47	-2208.1	-904.071	9.35944	416.7	0.44132	0.44654	0.40925	0.45113
										416.6	-4528.82	-2208.57	-906.23	4.47462	416.6	0.44155	0.4468	0.40937	0.45141
										416.5	-4528.61	-2212.88	-904.784	1.45271	416.5	0.44179	0.44715	0.40967	0.45167
										416.4	-4530.59	-2213.02	-907.122	0.23373	416.4	0.44207	0.44733	0.41005	0.45199
										416.3	-4528.17	-2211.43	-904.937	1.98528	416.3	0.44235	0.44741	0.41058	0.45236
										416.2	-4528.32	-2214.82	-905.24	2.93677	416.2	0.44253	0.44753	0.4111	0.45273
										416.1	-4523.81	-2212.56	-909.693	1.12928	416.1	0.44262	0.44761	0.41158	0.45313
										416	-4518.84	-2212.77	-909.198	0.09411	416	0.44273	0.44767	0.41188	0.45347
										415.9	-4520.58	-2215.8	-908.447	1.0769	415.9	0.44288	0.44754	0.41208	0.45383
										415.8	-4519.79	-2218.31	-910.74	0.91475	415.8	0.44297	0.44747	0.41225	0.45397
										415.7	-4517.48	-2215.66	-911.867	2.51991	415.7	0.44315	0.44731	0.41235	0.45412
										415.6	-4517.49	-2214.04	-908.003	-0.22355	415.6	0.44335	0.44731	0.41252	0.45415
										415.5	-4520.43	-2216.02	-909.304	5.86382	415.5	0.44361	0.44733	0.41261	0.45439
										415.4	-4526.36	-2218.65	-912.131	0.79526	415.4	0.44386	0.4474	0.41281	0.45449
										415.3	-4522.44	-2219.32	-911.797	-2.25598	415.3	0.44408	0.44742	0.41299	0.45457
										415.2	-4521.29	-2216.95	-914.276	-2.14377	415.2	0.44422	0.44738	0.41321	0.45474
										415.1	-4519.15	-2218.39	-916.535	-6.71938	415.1	0.44427	0.44751	0.41352	0.45492
										415	-4516.32	-2218.93	-919.475	-6.31311	415	0.44428	0.44767	0.41377	0.4552
										414.9	-4513.48	-2222.16	-917.518	-9.17385	414.9	0.44426	0.44777	0.41404	0.4555
										414.8	-4507.24	-2222.99	-919.275	-8.71289	414.8	0.44437	0.44791	0.41424	0.45582
										414.7	-4505.57	-2224.77	-921.165	-10.5228	414.7	0.4445	0.44799	0.41442	0.45598
										414.6	-4503.62	-2223.83	-922.579	-10.7355	414.6	0.44468	0.44806	0.41463	0.45617
										414.5	-4503.96	-2224.01	-921.98	-6.93255	414.5	0.44493	0.44815	0.41483	0.45635
										414.4	-4501.62	-2225.09	-921.673	-7.73535	414.4	0.44501	0.44814	0.41491	0.4565
										414.3	-4496.85	-2223.27	-921.635	-5.98384	414.3	0.44496	0.44815	0.41501	0.45658
										414.2	-4492.57	-2223.15	-920.678	-11.8458	414.2	0.44479	0.44813	0.41501	0.45675
										414.1	-4485.54	-2221.71	-920.901	-13.744	414.1	0.44462	0.44823	0.41511	0.45689
										414	-4479.89	-2225.8	-923.36	-14.6532	414	0.44449	0.44831	0.41513	0.4571
										413.9	-4474.89	-2228.6	-927.083	-15.359	413.9	0.44439	0.44841	0.41521	0.45731
										413.8	-4469.15	-2231.26	-926.541	-12.1187	413.8	0.44431	0.44846	0.41526	0.45753
										413.7	-4462.8	-2232.42	-926.153	-8.62488	413.7	0.44426	0.44852	0.41541	0.45768
										413.6	-4459.67	-2228.75	-926.95	-11.053	413.6	0.44419	0.44843	0.41549	0.45787
										413.5	-4457.02	-2230.06	-926.14	-16.7327	413.5	0.44403	0.44844	0.41565	0.45801
										413.4	-4457.3	-2227.64	-923.133	-16.304	413.4	0.444	0.44836	0.4158	0.45813
										413.3	-4453.63	-2226.98	-923.012	-12.6344	413.3	0.44389	0.44829	0.41595	0.45835
										413.2	-4450.41	-2224.42	-922.607	-14.2725	413.2	0.4437	0.44823	0.41611	0.45852
										413.1	-4443.69	-2220.49	-925.488	-10.2633	413.1	0.44342	0.44828	0.41622	0.45852
										413	-4438.02	-2222.24	-926.442	-7.64604	413	0.44314	0.4483	0.41631	0.45854
										412.9	-4433.08	-2220.07	-931.334	-11.1925	412.9	0.44288	0.44856	0.41637	0.45854
										412.8	-4429.6	-2215.77	-930.72	-13.7199	412.8	0.44279	0.44869	0.41629	0.45846
										412.7	-4428.12	-2213.83	-931.13	-14.3437	412.7	0.44273	0.44884	0.41635	0.45828
										412.6	-4423.96	-2211.13	-933.712	-12.9175	412.6	0.4427	0.4489	0.41639	0.4582
										412.5	-4417.02	-2211.75	-932.34	-11.7826	412.5	0.44269	0.44894	0.4164	0.45812
										412.4	-4410.35	-2212.72	-930.82	-9.87492	412.4	0.44258	0.44904	0.41644	0.45812
										412.3	-4407.83	-2210.04	-930.433	-14.0066	412.3	0.44249	0.44914	0.41649	0.45803
										412.2	-4402.33	-2211.57	-931.032	-15.2082	412.2	0.44237	0.44903	0.41648	0.45803
										412.1	-4395.35	-2207.65	-929.826	-20.0502	412.1	0.44214	0.44891	0.41655	0.45793
										412	-4389.96	-2206.39	-929.022	-22.2506	412	0.442	0.44865	0.41649	0.45782
										411.9	-4384.5	-2204.78	-929.18	-21.9662	411.9	0.44188	0.44845	0.41646	0.45772
										411.8	-4377	-2203.41	-931.544	-21.5209	411.8	0.44172	0.44824	0.41635	0.4576
										411.7	-4372.29	-2202.6	-930.073	-18.9851	411.7	0.44159	0.44803	0.41621	0.45761
										411.6	-4369.5	-2198.47	-929.306	-19.2322	411.6	0.44146	0.44772	0.41608	0.45769
										411.5	-4362.82	-2196.88	-929.921	-18.7859	411.5	0.44124	0.44755	0.416	0.45773
										411.4	-4355.87	-2190.37	-930.566	-19.8907	411.4	0.4409	0.44732	0.41597	0.45763
										411.3	-4348.74	-2190.66	-929.746	-20.7878	411.3	0.4405	0.44704	0.41591	0.45752
										411.2	-4339.8	-2189.42	-929.947	-17.0563	411.2	0.44009	0.44681	0.41585	0.45734
										411.1	-4329.23	-2186.68	-933.164	-19.934	411.1	0.43968	0.4465	0.41577	0.45715
										411	-4324.2	-2183.63	-935.552	-18.9226	411	0.4395	0.44629	0.41569	0.45686
										410.9	-4320.76	-2181.79	-936.772	-23.0708	410.9	0.43931	0.446	0.41552	0.45656
										410.8	-4316.85	-2180.98	-936.032	-20.4959	410.8	0.43927	0.44569	0.41541	0.4563
										410.7	-4312.35	-2180.69	-928.987	-21.7835	410.7	0.43911	0.4453	0.41523	0.45602
										410.6	-4305.26	-2174.83	-929.197	-21.1071	410.6	0.43897	0.44483	0.415	0.45577
										410.5	-4297.53	-2168.91	-928.522	-19.1222	410.5	0.43874	0.4444	0.41481	0.45552
										410.4	-4293.86	-2161.15	-926.138	-20.8371	410.4	0.43845	0.44401	0.41461	0.45526
										410.3	-4285.46	-2163.77	-927.054	-20.626	410.3	0.43809	0.44377	0.41434	0.455
										410.2	-4280.25	-2160.65	-928.026	-20.5893	410.2	0.4377	0.44352	0.41403	0.45473
										410.1	-4272.13	-2160.81	-928.09	-19.4546	410.1	0.43727	0.44332	0.41376	0.45439
										410	-4260.9	-2162.64	-931.392	-17.6839	410	0.43676	0.44308	0.41342	0.45393
										409.9	-4253.26	-2163.84	-929.83	-18.3659	409.9	0.43633	0.44276	0.41309	0.45347
										409.8	-4246.14	-2164.11	-927.875	-16.369	409.8	0.43592	0.44226	0.41268	0.45299
										409.7	-4237.71	-2161.33	-928.932	-19.2967	409.7	0.4356	0.44169	0.41229	0.45264
										409.6	-4229.87	-2159.13	-921.755	-16.3358	409.6	0.43518	0.44116	0.41196	0.45218
										409.5	-4223.74	-2157.99	-922.108	-15.4464	409.5	0.43479	0.44048	0.41163	0.45176
										409.4	-4213.9	-2157.27	-925.078	-14.7774	409.4	0.4343	0.43987	0.41136	0.45122
										409.3	-4205.96	-2155.62	-925.151	-17.6184	409.3	0.43385	0.43923	0.41102	0.45081
										409.2	-4198.78	-2152.86	-924.571	-17.9197	409.2	0.43329	0.43868	0.41077	0.4504
										409.1	-4190.3	-2150.5	-927.021	-17.7473	409.1	0.43276	0.43811	0.41046	0.44999
										409	-4180.94	-2143.85	-923.756	-17.6072	409	0.43211	0.43758	0.41012	0.44966
										408.9	-4170.18	-2141.7	-922.709	-15.6451	408.9	0.43144	0.43722	0.40973	0.44931
										408.8	-4164	-2138.76	-921.702	-9.66479	408.8	0.43083	0.43682	0.40926	0.44894
										408.7	-4152.8	-2133.9	-921.806	-6.84529	408.7	0.43018	0.43629	0.40879	0.44854
										408.6	-4142.39	-2127.04	-919.933	-2.45985	408.6	0.42963	0.43559	0.4082	0.44816
										408.5	-4132.48	-2123.16	-917.847	0.17673	408.5	0.42907	0.43486	0.40772	0.44776
										408.4	-4122.52	-2112.1	-917.495	-2.91858	408.4	0.42848	0.43404	0.40713	0.44722
										408.3	-4111.56	-2105.43	-915.948	-4.25469	408.3	0.42781	0.43322	0.40659	0.44666
										408.2	-4100.98	-2100.46	-913.531	-0.54959	408.2	0.42709	0.4324	0.40607	0.446
										408.1	-4091.91	-2094.11	-909.532	2.89714	408.1	0.42643	0.43166	0.40551	0.44544
										408	-4083.19	-2090.2	-906.765	3.96916	408	0.42577	0.43078	0.40493	0.44498
										407.9	-4072.23	-2083.2	-906.907	4.2935	407.9	0.42515	0.42996	0.40443	0.44453
										407.8	-4061.24	-2076.45	-906.252	3.43939	407.8	0.42434	0.42914	0.40393	0.44398
										407.7	-4049.76	-2070.84	-903.482	5.57152	407.7	0.42352	0.42818	0.40339	0.44346
										407.6	-4037.75	-2064.97	-900.12	3.9192	407.6	0.42266	0.42754	0.40289	0.44294
										407.5	-4026.13	-2056.21	-896.285	6.78702	407.5	0.42179	0.42666	0.40223	0.44233
										407.4	-4011.15	-2050.23	-900.188	8.01193	407.4	0.42084	0.426	0.40168	0.4417
										407.3	-4004.13	-2045.28	-899.037	6.95771	407.3	0.42024	0.42547	0.40121	0.44119
										407.2	-3992.62	-2043.3	-894.866	9.37632	407.2	0.41943	0.42468	0.4005	0.44045
										407.1	-3983.01	-2038.31	-893.872	10.5162	407.1	0.41874	0.42386	0.39971	0.43975
										407	-3971.88	-2036.47	-891.181	10.1131	407	0.41802	0.423	0.399	0.43895
										406.9	-3960.3	-2029.52	-888.095	8.06389	406.9	0.41727	0.42199	0.39826	0.4383
										406.8	-3947.65	-2024.25	-884.746	6.60009	406.8	0.41649	0.42097	0.39769	0.43767
										406.7	-3937.17	-2014.77	-878.93	3.34834	406.7	0.41575	0.41975	0.39697	0.4371
										406.6	-3924.7	-2007.99	-882.289	1.60048	406.6	0.41497	0.41873	0.39625	0.4366
										406.5	-3912.92	-1999.46	-882.491	1.21547	406.5	0.41409	0.4177	0.39559	0.43605
										406.4	-3899.18	-1990.88	-881.245	-1.29325	406.4	0.41313	0.41686	0.39486	0.43545
										406.3	-3884.51	-1982.13	-879.327	-1.94126	406.3	0.41225	0.41605	0.39407	0.43469
										406.2	-3869.46	-1977.01	-878.89	-3.66872	406.2	0.41134	0.41527	0.39316	0.43389
										406.1	-3856.99	-1970.22	-876.136	1.24333	406.1	0.41037	0.41462	0.39239	0.4332
										406	-3841.03	-1963.72	-873.635	2.2376	406	0.4094	0.41381	0.39149	0.43251
										405.9	-3829.59	-1955.17	-871.282	6.07424	405.9	0.40843	0.41296	0.3905	0.43172
										405.8	-3815.25	-1947.74	-868.488	4.64296	405.8	0.40754	0.41188	0.3895	0.43092
										405.7	-3803.81	-1942.7	-870.274	1.87978	405.7	0.40664	0.41075	0.38853	0.43013
										405.6	-3790.24	-1936.37	-869.622	2.38416	405.6	0.40583	0.40948	0.38755	0.42919
										405.5	-3778.4	-1929.32	-866.733	2.65319	405.5	0.40509	0.40811	0.38666	0.42834
										405.4	-3762.33	-1921.66	-861.511	0.99361	405.4	0.40423	0.40685	0.38577	0.42748
										405.3	-3750.75	-1915.72	-858.071	-3.1472	405.3	0.40337	0.40568	0.38489	0.42667
										405.2	-3738.55	-1914.66	-855.643	-3.48046	405.2	0.40235	0.40468	0.38416	0.42582
										405.1	-3726.84	-1911	-854.503	-1.92796	405.1	0.40131	0.40371	0.38338	0.42487
										405	-3712.73	-1911.77	-854.771	-0.23646	405	0.40023	0.40287	0.38267	0.42381
										404.9	-3695.28	-1907.12	-850.432	0.45568	404.9	0.39902	0.40177	0.38165	0.42247
										404.8	-3681.14	-1901.15	-851.326	-3.39658	404.8	0.39804	0.40083	0.3808	0.42137
										404.7	-3667.33	-1896.32	-850.208	-3.4803	404.7	0.39702	0.40001	0.37992	0.4202
										404.6	-3654.13	-1892.64	-847.507	-3.07997	404.6	0.39596	0.39906	0.37894	0.41909
										404.5	-3640.37	-1889.22	-841.487	-4.78223	404.5	0.39495	0.39793	0.37795	0.41806
										404.4	-3626.32	-1882.95	-839.514	-6.73331	404.4	0.39394	0.39677	0.37688	0.41702
										404.3	-3613.68	-1875.03	-837.312	-7.56401	404.3	0.39296	0.39556	0.37576	0.41606
										404.2	-3596.52	-1869.75	-838.892	-7.68764	404.2	0.39196	0.39432	0.37472	0.415
										404.1	-3584.95	-1867.19	-836.166	-10.1936	404.1	0.39102	0.39299	0.37357	0.41394
										404	-3568.57	-1858.78	-832.035	-9.57135	404	0.38972	0.39141	0.37238	0.41262
										403.9	-3552.02	-1850.12	-831.127	-11.9512	403.9	0.38855	0.3902	0.37159	0.41149
										403.8	-3539.58	-1846.05	-828.739	-12.9343	403.8	0.38741	0.38898	0.37074	0.41039
										403.7	-3522.98	-1840.06	-825.748	-11.0787	403.7	0.38619	0.38789	0.36984	0.40936
										403.6	-3506.05	-1834.67	-826.263	-11.2554	403.6	0.38501	0.38673	0.36881	0.40827
										403.5	-3490.14	-1830.07	-825.157	-9.0205	403.5	0.3838	0.38568	0.36773	0.4071
										403.4	-3469	-1821.39	-822.098	-13.1576	403.4	0.38233	0.38433	0.36629	0.40548
										403.3	-3451.59	-1811.18	-818.637	-12.214	403.3	0.3811	0.38316	0.36514	0.40404
										403.2	-3436.18	-1805.03	-816.327	-9.62046	403.2	0.37997	0.38191	0.36397	0.40267
										403.1	-3420.42	-1797.39	-811.759	-8.90354	403.1	0.37862	0.38048	0.36287	0.40123
										403	-3406.34	-1788.86	-809.948	-7.40574	403	0.37739	0.37903	0.36181	0.4
										402.9	-3386.33	-1779.11	-810.184	-9.85019	402.9	0.37573	0.37702	0.36041	0.39854
										402.8	-3371.95	-1767.92	-804.304	-6.93882	402.8	0.37444	0.37545	0.35935	0.39744
										402.7	-3353.02	-1759.81	-800.294	-9.34601	402.7	0.37316	0.37394	0.35839	0.39636
										402.6	-3336.67	-1754.07	-798.372	-13.8116	402.6	0.3719	0.37262	0.35743	0.39519
										402.5	-3324.01	-1748.81	-792.546	-13.2607	402.5	0.37078	0.37144	0.35645	0.394
										402.4	-3308.79	-1741.06	-790.309	-12.9611	402.4	0.36955	0.37036	0.3555	0.39283
										402.3	-3291.08	-1733.35	-787.59	-16.2034	402.3	0.36801	0.36894	0.35422	0.39125
										402.2	-3278.6	-1725.72	-785.137	-15.609	402.2	0.36671	0.36791	0.3531	0.39001
										402.1	-3263.38	-1718.65	-783.087	-14.2411	402.1	0.3653	0.36683	0.35191	0.38868
										402	-3245.63	-1713.19	-782.101	-13.2384	402	0.36389	0.36558	0.3506	0.38735
										401.9	-3228.38	-1703.71	-778.706	-14.805	401.9	0.36246	0.36419	0.34929	0.38624
										401.8	-3209.26	-1694.31	-775.04	-16.3857	401.8	0.36106	0.3626	0.34796	0.38507
										401.7	-3191.86	-1684.25	-771.335	-20.731	401.7	0.35967	0.36106	0.34662	0.38401
										401.6	-3177.26	-1672.73	-768.887	-16.7084	401.6	0.35834	0.35943	0.3454	0.38279
										401.5	-3159.95	-1668.23	-765.054	-18.2003	401.5	0.35698	0.35786	0.34411	0.38171
										401.4	-3140.46	-1655.99	-760.345	-20.0124	401.4	0.35562	0.35636	0.34284	0.38067
										401.3	-3125.59	-1644.14	-759.144	-23.0619	401.3	0.35433	0.35496	0.34159	0.37957
										401.2	-3109.84	-1634.14	-757.352	-19.7194	401.2	0.35308	0.35371	0.34043	0.37831
										401.1	-3093.09	-1627.97	-751.595	-18.5147	401.1	0.35178	0.35234	0.33938	0.37694
										401	-3077.52	-1618.52	-747.458	-16.5965	401	0.35051	0.35117	0.33821	0.37558
										400.9	-3061.49	-1612.19	-741.114	-15.1822	400.9	0.34916	0.34997	0.33703	0.37421
										400.8	-3043.32	-1601.91	-739.252	-16.8309	400.8	0.34776	0.34873	0.33574	0.3729
										400.7	-3023.2	-1596.89	-738.643	-17.2463	400.7	0.34635	0.34743	0.33434	0.37159
										400.6	-3006.8	-1590.91	-733.632	-18.1335	400.6	0.34501	0.34607	0.33295	0.37037
										400.5	-2991.19	-1580.43	-732.469	-18.1854	400.5	0.34357	0.34461	0.33162	0.3692
										400.4	-2977.19	-1571.84	-729.93	-19.0631	400.4	0.3422	0.34302	0.33031	0.36801
										400.3	-2962.92	-1564.3	-724.751	-11.8589	400.3	0.34089	0.34146	0.32902	0.36682
[truncated: 503 more rows]
