# Supplementary material for: Achieving Robust Cholesteric Liquid Crystal Polymer Networks with High Luminescence Dissymmetry Factor
Source: Research Square preprint supplement (doi:10.21203/rs.3.rs-7436711/v1), 2025-09-17
Supplement: Supplementary file 12 [file d7781baadb69f4861deacbc8.xlsx]

## Sheet: Sheet1
CPL					CD
	(S-M)0.01-(PC6)0.99-55℃	(S-M)0.03-(PC6)0.97-45℃	(S-M)0.05-(PC6)0.95-70℃	(S-M)0.1-(PC6)0.9-65℃		(S-M)0.01-(PC6)0.99-55℃	(S-M)0.03-(PC6)0.97-45℃	(S-M)0.05-(PC6)0.95-70℃	(S-M)0.1-(PC6)0.9-65℃
700	0.44595	0.44839	0.52529	0.73467	700	0.00474	0.00412	0.00391	0.0041
699.9	0.59068	0.46859	0.43427	0.77255	699.9	0.00471	0.00414	0.00391	0.00413
699.8	0.60508	0.48728	0.58576	0.69848	699.8	0.00474	0.00414	0.00395	0.00415
699.7	0.4894	0.46294	0.64744	0.85317	699.7	0.00473	0.00414	0.00397	0.00414
699.6	0.35938	0.44898	0.67739	0.82652	699.6	0.00477	0.00414	0.00399	0.00412
699.5	0.46622	0.48994	0.66666	0.66926	699.5	0.00478	0.0041	0.00399	0.00412
699.4	0.47557	0.48982	0.73356	0.83816	699.4	0.00478	0.00411	0.00402	0.00412
699.3	0.52099	0.51692	0.68049	0.88413	699.3	0.00482	0.00411	0.00402	0.00411
699.2	0.47358	0.47012	0.68079	0.88878	699.2	0.0048	0.00411	0.00396	0.00409
699.1	0.36082	0.51269	0.76408	0.92159	699.1	0.00482	0.00413	0.00396	0.00409
699	0.34842	0.54197	0.79336	0.93583	699	0.00482	0.00413	0.00398	0.00407
698.9	0.42585	0.56999	0.80002	0.90478	698.9	0.00483	0.00411	0.00395	0.00408
698.8	0.3888	0.61965	0.77605	0.99538	698.8	0.00484	0.00408	0.00394	0.00407
698.7	0.3614	0.61023	0.72814	0.91189	698.7	0.00486	0.00412	0.00391	0.00406
698.6	0.3379	0.57312	0.68762	0.89428	698.6	0.00488	0.00413	0.00392	0.00404
698.5	0.43346	0.60159	0.72445	0.84615	698.5	0.00489	0.00412	0.00391	0.00402
698.4	0.46936	0.62732	0.68687	0.79874	698.4	0.0049	0.00408	0.00394	0.00403
698.3	0.53944	0.68859	0.66665	0.80425	698.3	0.00491	0.00406	0.00396	0.00399
698.2	0.56307	0.54572	0.51549	0.87399	698.2	0.00488	0.00406	0.00394	0.00403
698.1	0.53676	0.46241	0.50111	0.81967	698.1	0.00493	0.0041	0.00394	0.00406
698	0.582	0.55137	0.50254	0.78474	698	0.0049	0.00406	0.00398	0.00406
697.9	0.63291	0.58085	0.42418	0.715	697.9	0.00489	0.00407	0.00396	0.00408
697.8	0.6347	0.54692	0.34644	0.7396	697.8	0.00489	0.00403	0.00401	0.00404
697.7	0.68977	0.4762	0.32927	0.67086	697.7	0.00495	0.004	0.00405	0.00409
697.6	0.66925	0.36184	0.43636	0.62523	697.6	0.00497	0.00399	0.004	0.00412
697.5	0.57903	0.51503	0.4131	0.68118	697.5	0.00498	0.00401	0.00396	0.00414
697.4	0.45125	0.49035	0.3591	0.67046	697.4	0.00502	0.00401	0.00396	0.00414
697.3	0.49095	0.51472	0.30425	0.75367	697.3	0.00499	0.004	0.00396	0.00415
697.2	0.55237	0.55875	0.248	0.70746	697.2	0.00494	0.00398	0.00397	0.00414
697.1	0.77543	0.53838	0.2891	0.82323	697.1	0.00492	0.00399	0.00403	0.00413
697	0.75295	0.61992	0.30955	0.93556	697	0.00497	0.00401	0.004	0.00412
696.9	0.80744	0.61055	0.25077	0.89347	696.9	0.00497	0.00404	0.004	0.00415
696.8	0.69945	0.62829	0.23584	0.85247	696.8	0.00497	0.00406	0.004	0.00416
696.7	0.68588	0.65237	0.10554	0.84266	696.7	0.005	0.00405	0.00399	0.00414
696.6	0.7334	0.75981	0.09101	0.89228	696.6	0.00501	0.00409	0.004	0.00419
696.5	0.71343	0.69182	0.01111	0.85743	696.5	0.005	0.00412	0.004	0.00419
696.4	0.69676	0.7584	-0.02322	0.88932	696.4	0.00502	0.00415	0.00398	0.00418
696.3	0.6576	0.7396	0.01458	1.00802	696.3	0.00503	0.00414	0.00397	0.00418
696.2	0.74187	0.7725	-0.0634	0.8645	696.2	0.00505	0.00418	0.00395	0.0042
696.1	0.69979	0.74528	-0.1032	0.89134	696.1	0.00507	0.00416	0.00394	0.00421
696	0.84482	0.75322	-0.32024	0.82704	696	0.00506	0.00416	0.00392	0.00424
695.9	0.92894	0.74758	-0.21903	0.74159	695.9	0.00503	0.00418	0.00392	0.00424
695.8	0.81761	0.75161	-0.15983	0.75239	695.8	0.00504	0.00421	0.00394	0.00427
695.7	0.86026	0.72385	-0.16105	0.70766	695.7	0.00504	0.00423	0.00392	0.00427
695.6	0.73311	0.65519	-0.20886	0.60889	695.6	0.00503	0.00425	0.00391	0.00426
695.5	0.79992	0.70988	-0.11207	0.62117	695.5	0.00503	0.00423	0.00394	0.00428
695.4	0.72593	0.76323	-0.07438	0.68965	695.4	0.00507	0.00425	0.00394	0.00429
695.3	0.69822	0.78938	-0.08321	0.73878	695.3	0.00504	0.00427	0.00396	0.00432
695.2	0.73985	0.8357	-0.07012	0.64641	695.2	0.00502	0.00432	0.00394	0.0043
695.1	0.86502	0.79259	-0.14506	0.62204	695.1	0.00505	0.00437	0.00391	0.0043
695	0.88368	0.88586	-0.01116	0.50265	695	0.00507	0.00438	0.00393	0.00429
694.9	0.87352	0.89349	-0.03264	0.46688	694.9	0.00506	0.00438	0.00397	0.00426
694.8	0.86693	0.77989	-0.07401	0.53209	694.8	0.0051	0.00441	0.00396	0.00425
694.7	0.74489	0.78718	0.00226	0.58394	694.7	0.00513	0.00446	0.00398	0.00426
694.6	0.80339	0.82598	-0.05469	0.61086	694.6	0.00512	0.0045	0.00391	0.0043
694.5	0.94905	0.95994	-0.11598	0.69017	694.5	0.0051	0.00453	0.00392	0.00431
694.4	1.00602	0.88429	-0.07539	0.72701	694.4	0.00509	0.00455	0.00395	0.0043
694.3	0.95613	0.71368	-0.07057	0.66344	694.3	0.0051	0.00456	0.00402	0.00429
694.2	1.09081	0.72705	-0.01596	0.67145	694.2	0.0051	0.00458	0.00401	0.00429
694.1	1.0491	0.74217	-0.00397	0.64704	694.1	0.00512	0.00459	0.00403	0.00434
694	1.05483	0.7416	-0.03611	0.56005	694	0.00514	0.0046	0.00404	0.00433
693.9	0.93324	0.63184	-0.03953	0.48701	693.9	0.00518	0.0046	0.00403	0.00433
693.8	0.93191	0.58662	-0.03985	0.34311	693.8	0.00516	0.0046	0.00407	0.00436
693.7	0.84396	0.67403	-0.14505	0.34612	693.7	0.00518	0.00462	0.00407	0.00437
693.6	0.87026	0.64332	-0.07436	0.33496	693.6	0.00518	0.00464	0.00408	0.00436
693.5	0.77686	0.51205	-0.0331	0.37137	693.5	0.00519	0.00462	0.00408	0.0044
693.4	0.74322	0.49572	-0.01466	0.26614	693.4	0.00521	0.00461	0.00408	0.00435
693.3	0.56783	0.4404	0.06323	0.30287	693.3	0.00521	0.0046	0.00406	0.00435
693.2	0.65075	0.52985	0.08239	0.18359	693.2	0.0052	0.00458	0.00406	0.00438
693.1	0.64357	0.33907	0.05589	0.04401	693.1	0.00521	0.0046	0.00408	0.00439
693	0.52054	0.22656	0.21206	-0.06784	693	0.00519	0.00458	0.00409	0.00438
692.9	0.64322	0.17347	0.19587	-0.10186	692.9	0.00515	0.00453	0.00411	0.00441
692.8	0.66643	0.24062	0.30716	-0.06314	692.8	0.00518	0.00453	0.00413	0.00442
692.7	0.59622	0.18824	0.24434	-0.00416	692.7	0.00521	0.00454	0.00411	0.00442
692.6	0.64396	0.15836	0.10132	-0.04141	692.6	0.00523	0.00453	0.00414	0.0044
692.5	0.59339	0.05064	0.00424	-0.04736	692.5	0.00524	0.00449	0.00418	0.0044
692.4	0.55557	-0.00217	0.08568	-0.08201	692.4	0.00524	0.00449	0.00416	0.00441
692.3	0.70688	-0.06811	0.0873	-0.0819	692.3	0.00524	0.00451	0.00419	0.0044
692.2	0.66341	-0.04278	0.02348	-0.16446	692.2	0.00524	0.00451	0.00418	0.00439
692.1	0.66451	-0.06146	0.08702	-0.23502	692.1	0.00523	0.00454	0.00418	0.00439
692	0.5964	-0.13121	0.08895	-0.21678	692	0.00527	0.00454	0.00417	0.00436
691.9	0.56711	-0.24741	0.1331	-0.12882	691.9	0.00529	0.00452	0.00417	0.00438
691.8	0.51205	-0.2589	0.25593	-0.10753	691.8	0.00529	0.00454	0.00423	0.00435
691.7	0.32054	-0.23009	0.23627	0.01591	691.7	0.00526	0.00456	0.00426	0.00438
691.6	0.44287	-0.16396	0.21705	0.048	691.6	0.00523	0.00452	0.00428	0.00439
691.5	0.40825	-0.05627	0.24875	-0.05341	691.5	0.00522	0.00451	0.00426	0.0044
691.4	0.38697	-0.0215	0.22037	-0.04194	691.4	0.00525	0.00447	0.00427	0.00442
691.3	0.30848	-0.09021	0.30733	0.05266	691.3	0.00526	0.00447	0.00431	0.00441
691.2	0.27898	-0.15346	0.35997	-0.02557	691.2	0.00525	0.00446	0.00432	0.00439
691.1	0.20746	-0.19535	0.32716	-0.05551	691.1	0.00525	0.00445	0.00431	0.0044
691	0.43538	-0.02137	0.26269	-0.03256	691	0.00524	0.00449	0.00432	0.0044
690.9	0.34483	-0.06003	0.32191	-0.05169	690.9	0.00524	0.00451	0.00431	0.00439
690.8	0.28689	-0.03419	0.34556	0.01896	690.8	0.00521	0.00451	0.00432	0.0044
690.7	0.36584	-0.05327	0.32913	0.05565	690.7	0.00523	0.0045	0.00431	0.00443
690.6	0.4343	-0.05126	0.45402	0.0968	690.6	0.00523	0.00451	0.00427	0.0044
690.5	0.33438	-0.06277	0.3601	0.18349	690.5	0.00526	0.00453	0.00426	0.0044
690.4	0.29963	-0.10692	0.4321	0.23539	690.4	0.00527	0.00451	0.00427	0.00438
690.3	0.24156	-0.14699	0.45914	0.22683	690.3	0.00524	0.00447	0.00428	0.00438
690.2	0.14462	-0.04255	0.42997	0.28296	690.2	0.00526	0.00447	0.00429	0.00436
690.1	0.20345	-0.01254	0.4115	0.26839	690.1	0.00527	0.0045	0.00432	0.00437
690	0.25334	0.0253	0.45263	0.27221	690	0.00527	0.00451	0.00433	0.0044
689.9	0.22734	0.10754	0.44489	0.30386	689.9	0.00526	0.0045	0.00433	0.00438
689.8	0.26163	0.15587	0.49425	0.29035	689.8	0.00526	0.00453	0.00434	0.00437
689.7	0.26521	0.3217	0.49028	0.34426	689.7	0.00529	0.00455	0.00433	0.00435
689.6	0.26135	0.41614	0.42821	0.43437	689.6	0.00529	0.00454	0.00433	0.00436
689.5	0.19593	0.63662	0.40856	0.44728	689.5	0.00532	0.00456	0.00435	0.00434
689.4	0.10703	0.60235	0.37465	0.45806	689.4	0.00533	0.00458	0.00439	0.00432
689.3	0.07304	0.65228	0.37451	0.45476	689.3	0.00536	0.00456	0.00442	0.00433
689.2	0.04298	0.7288	0.52872	0.60486	689.2	0.00537	0.00458	0.00441	0.00437
689.1	0.04396	0.71632	0.53319	0.73724	689.1	0.00539	0.00462	0.00439	0.00438
689	0.00476	0.7118	0.56786	0.80479	689	0.00538	0.00461	0.00441	0.00437
688.9	-0.00618	0.85989	0.57216	0.83938	688.9	0.00539	0.00462	0.00442	0.00437
688.8	0.06173	0.97386	0.61688	0.95306	688.8	0.00539	0.00461	0.00441	0.00435
688.7	0.08035	0.92801	0.52076	0.94859	688.7	0.00542	0.0046	0.00442	0.00435
688.6	0.28979	0.99695	0.54587	0.93272	688.6	0.00539	0.00459	0.0044	0.00433
688.5	0.17991	1.14131	0.33681	0.87645	688.5	0.0054	0.00457	0.00442	0.00436
688.4	0.25789	1.19196	0.23959	0.86111	688.4	0.00539	0.00456	0.0044	0.00438
688.3	0.38697	1.25367	0.27521	0.87639	688.3	0.00538	0.00458	0.00439	0.00437
688.2	0.49608	1.21155	0.34312	0.82236	688.2	0.00541	0.0046	0.00436	0.00439
688.1	0.29941	1.23885	0.37164	0.92759	688.1	0.00547	0.00461	0.00438	0.0044
688	0.28358	1.10984	0.29055	0.92672	688	0.00546	0.0046	0.00434	0.00438
687.9	0.07287	1.13015	0.36299	0.74583	687.9	0.00547	0.0046	0.00435	0.00437
687.8	0.12268	1.08742	0.35542	0.72318	687.8	0.00549	0.00461	0.00435	0.00436
687.7	0.12837	1.13545	0.39719	0.8624	687.7	0.00549	0.00462	0.00436	0.00435
687.6	0.14169	1.15799	0.24383	0.85074	687.6	0.0055	0.00459	0.00439	0.00438
687.5	0.16543	1.18003	0.34681	0.84655	687.5	0.00547	0.00453	0.00438	0.00438
687.4	0.26496	1.12908	0.41513	0.83942	687.4	0.00548	0.00454	0.00436	0.00439
687.3	0.34082	1.1475	0.24744	0.81898	687.3	0.00551	0.00455	0.00436	0.00435
687.2	0.30938	1.16758	0.33064	0.73832	687.2	0.00552	0.00455	0.00433	0.00437
687.1	0.28948	1.36138	0.30711	0.61956	687.1	0.0055	0.00449	0.0043	0.00439
687	0.23417	1.51824	0.33854	0.45902	687	0.00548	0.0045	0.00431	0.00438
686.9	0.25806	1.44856	0.31289	0.56064	686.9	0.00554	0.00454	0.00434	0.0044
686.8	0.39447	1.37333	0.37281	0.47407	686.8	0.00552	0.00455	0.00435	0.00441
686.7	0.38799	1.39345	0.29489	0.55465	686.7	0.0055	0.00458	0.00434	0.00441
686.6	0.30808	1.42866	0.24852	0.60984	686.6	0.00551	0.00457	0.00433	0.00439
686.5	0.29466	1.32483	0.30699	0.61418	686.5	0.0055	0.0046	0.00433	0.00439
686.4	0.42976	1.27717	0.2824	0.61504	686.4	0.00546	0.0046	0.00436	0.00444
686.3	0.29201	1.24347	0.36707	0.60977	686.3	0.00548	0.0046	0.00437	0.00447
686.2	0.29679	1.2675	0.1891	0.64352	686.2	0.00547	0.00462	0.0044	0.00448
686.1	0.49127	1.05349	0.18066	0.72271	686.1	0.00548	0.00465	0.00441	0.00447
686	0.48714	1.07579	0.32895	0.616	686	0.0055	0.00467	0.00439	0.00449
685.9	0.52228	1.00169	0.30798	0.6335	685.9	0.00547	0.00467	0.00436	0.00449
685.8	0.5136	0.99192	0.42906	0.60762	685.8	0.00546	0.00472	0.00434	0.0045
685.7	0.42072	1.01954	0.42627	0.56071	685.7	0.00547	0.0047	0.00433	0.00449
685.6	0.39575	1.12372	0.45878	0.4418	685.6	0.0055	0.00468	0.00436	0.00452
685.5	0.37606	1.24217	0.39892	0.42975	685.5	0.00554	0.00468	0.00436	0.00453
685.4	0.42198	1.11292	0.40889	0.46039	685.4	0.00553	0.00465	0.00438	0.00462
685.3	0.37927	1.15905	0.36014	0.39419	685.3	0.00557	0.00464	0.0044	0.00463
685.2	0.33449	1.25044	0.42441	0.36839	685.2	0.00559	0.00469	0.00441	0.00467
685.1	0.42615	1.25818	0.32021	0.43726	685.1	0.0056	0.00468	0.00441	0.00465
685	0.46651	1.08552	0.43031	0.47559	685	0.00564	0.00473	0.0044	0.00464
684.9	0.50308	1.10225	0.51943	0.44428	684.9	0.00566	0.00472	0.00442	0.00464
684.8	0.32364	1.17582	0.50696	0.48795	684.8	0.00565	0.00472	0.00443	0.00464
684.7	0.40704	0.92286	0.43865	0.5271	684.7	0.00567	0.00472	0.00442	0.00467
684.6	0.54365	1.02096	0.3892	0.41531	684.6	0.00567	0.00475	0.00442	0.00468
684.5	0.57576	0.97656	0.32781	0.56312	684.5	0.00566	0.00479	0.00442	0.00472
684.4	0.66862	1.00835	0.28028	0.72743	684.4	0.00567	0.00478	0.00443	0.00475
684.3	0.66044	1.02285	0.38503	0.67582	684.3	0.00568	0.00477	0.00442	0.00476
684.2	0.75221	0.96587	0.44216	0.74379	684.2	0.00568	0.00481	0.0044	0.00478
684.1	0.79966	0.98857	0.37387	0.84254	684.1	0.00568	0.00482	0.00439	0.00478
684	0.76486	0.91997	0.28532	0.7468	684	0.00572	0.00484	0.00443	0.00478
683.9	0.68053	0.84145	0.27241	0.68175	683.9	0.00576	0.00484	0.00444	0.00479
683.8	0.674	0.8231	0.34451	0.76974	683.8	0.00575	0.00487	0.00445	0.0048
683.7	0.67986	0.76846	0.47591	0.82815	683.7	0.00578	0.00495	0.00452	0.0048
683.6	0.84441	0.69559	0.37792	0.91056	683.6	0.00579	0.00495	0.00452	0.00482
683.5	0.87359	0.68446	0.3447	0.92689	683.5	0.00579	0.00496	0.00451	0.00483
683.4	0.77492	0.79973	0.30263	1.02342	683.4	0.00584	0.00496	0.00452	0.00485
683.3	0.76506	0.73305	0.40862	0.9629	683.3	0.00587	0.00494	0.00451	0.00486
683.2	0.92757	0.62866	0.44014	0.95738	683.2	0.00589	0.00494	0.00451	0.00491
683.1	1.0863	0.52339	0.48326	0.91237	683.1	0.00592	0.00494	0.0045	0.0049
683	1.0005	0.54344	0.50658	0.93618	683	0.00595	0.00495	0.00451	0.00491
682.9	1.0282	0.60712	0.36556	0.92426	682.9	0.00597	0.00496	0.0045	0.0049
682.8	1.03992	0.46357	0.43319	0.87399	682.8	0.00597	0.00497	0.00449	0.00491
682.7	0.89106	0.57197	0.34201	0.85037	682.7	0.00596	0.00501	0.00449	0.00493
682.6	0.80533	0.48176	0.31772	0.75649	682.6	0.00603	0.005	0.00449	0.0049
682.5	0.78962	0.50591	0.31979	0.77724	682.5	0.00607	0.005	0.00453	0.0049
682.4	0.81526	0.42614	0.37244	0.69168	682.4	0.00611	0.00499	0.00457	0.00493
682.3	0.81723	0.40447	0.29214	0.69741	682.3	0.00608	0.00501	0.00456	0.00491
682.2	0.95799	0.2647	0.35502	0.72282	682.2	0.00611	0.00504	0.00455	0.0049
682.1	0.94628	0.30353	0.32548	0.6825	682.1	0.0061	0.00513	0.00454	0.00487
682	1.03492	0.18068	0.4038	0.76054	682	0.0061	0.00512	0.00455	0.00486
681.9	0.98755	0.13283	0.36542	0.77888	681.9	0.00609	0.00511	0.00455	0.00487
681.8	0.897	0.021	0.4891	0.89024	681.8	0.00607	0.00511	0.00457	0.0049
681.7	0.89413	-0.05441	0.57992	0.95347	681.7	0.00607	0.00509	0.00463	0.00492
681.6	0.89692	-0.01639	0.52178	0.99211	681.6	0.00608	0.00511	0.0046	0.00492
681.5	1.08184	-0.03192	0.56603	0.92804	681.5	0.00608	0.00513	0.00459	0.00494
681.4	1.09366	0.00786	0.59767	0.74483	681.4	0.00606	0.00512	0.00458	0.00493
681.3	1.03314	-0.10252	0.64487	0.7628	681.3	0.00606	0.00513	0.00461	0.00494
681.2	1.02775	-0.11017	0.73724	0.70135	681.2	0.00608	0.0051	0.00462	0.00491
681.1	0.93819	-0.08338	0.64982	0.60847	681.1	0.00608	0.00514	0.00464	0.0049
681	0.9396	-0.06153	0.65925	0.55614	681	0.0061	0.00515	0.00463	0.0049
680.9	0.82837	-0.02462	0.62383	0.45858	680.9	0.0061	0.00515	0.00465	0.00487
680.8	0.72576	-0.05338	0.61141	0.46987	680.8	0.00611	0.00516	0.00469	0.00487
680.7	0.62894	-0.11387	0.63286	0.44446	680.7	0.0061	0.00516	0.00471	0.00489
680.6	0.61977	-0.02734	0.64436	0.48174	680.6	0.00612	0.00517	0.00472	0.00491
680.5	0.64663	-0.04205	0.5014	0.59902	680.5	0.00611	0.00515	0.00474	0.00491
680.4	0.71255	-0.162	0.39759	0.61444	680.4	0.00607	0.00513	0.00473	0.00491
680.3	0.60839	-0.11873	0.46764	0.55948	680.3	0.00607	0.00516	0.00472	0.00493
680.2	0.45507	-0.13551	0.38909	0.42874	680.2	0.00608	0.00513	0.00475	0.0049
680.1	0.55861	-0.18701	0.46436	0.51536	680.1	0.00609	0.00517	0.00476	0.00491
680	0.50575	-0.02222	0.52595	0.43491	680	0.0061	0.00517	0.0048	0.00488
679.9	0.41516	0.07313	0.3905	0.35102	679.9	0.00609	0.00518	0.00481	0.00486
679.8	0.36639	0.07008	0.42134	0.3689	679.8	0.00609	0.00521	0.00484	0.00489
679.7	0.57468	0.15188	0.43423	0.4925	679.7	0.00609	0.00522	0.00485	0.00488
679.6	0.43754	0.25508	0.43586	0.49934	679.6	0.00611	0.0052	0.00486	0.00486
679.5	0.4999	0.2456	0.52566	0.55249	679.5	0.00612	0.00518	0.00489	0.00484
679.4	0.56854	0.33819	0.49096	0.6251	679.4	0.00609	0.00519	0.00491	0.00491
679.3	0.53648	0.28169	0.51481	0.63597	679.3	0.00606	0.00521	0.0049	0.00494
679.2	0.45252	0.27911	0.40644	0.74804	679.2	0.00602	0.00522	0.00491	0.00494
679.1	0.46406	0.29031	0.4751	0.71424	679.1	0.00605	0.00524	0.00492	0.00496
679	0.5495	0.15851	0.5054	0.65656	679	0.00604	0.00524	0.00492	0.00497
678.9	0.50662	0.04172	0.53271	0.68692	678.9	0.00603	0.00523	0.00493	0.00499
678.8	0.46477	0.14853	0.53415	0.6038	678.8	0.00606	0.00522	0.0049	0.00497
678.7	0.43236	0.10516	0.56661	0.63392	678.7	0.00605	0.00524	0.00489	0.00496
678.6	0.27173	0.2326	0.49833	0.4606	678.6	0.00612	0.00526	0.00488	0.00495
678.5	0.26995	0.29751	0.51682	0.43452	678.5	0.0061	0.00527	0.00487	0.00495
678.4	0.27654	0.25882	0.38784	0.45666	678.4	0.00612	0.00526	0.00489	0.005
678.3	0.26844	0.25285	0.41988	0.47526	678.3	0.00616	0.00525	0.00492	0.00501
678.2	0.23129	0.19601	0.41859	0.61896	678.2	0.00619	0.0053	0.00495	0.005
678.1	0.20463	0.35546	0.47899	0.71733	678.1	0.00618	0.00527	0.00494	0.00499
678	0.29557	0.39051	0.51706	0.62794	678	0.00618	0.00528	0.00493	0.00501
677.9	0.32602	0.25774	0.60761	0.65784	677.9	0.00617	0.00525	0.00495	0.00502
677.8	0.48875	0.18365	0.5328	0.86793	677.8	0.00615	0.00524	0.00497	0.00505
677.7	0.6033	0.27221	0.5972	0.97309	677.7	0.00619	0.00526	0.00495	0.00506
677.6	0.63482	0.28965	0.49885	1.08783	677.6	0.00615	0.00529	0.00496	0.00506
677.5	0.67998	0.3172	0.56153	0.98693	677.5	0.00615	0.00529	0.00491	0.00503
677.4	0.78081	0.38998	0.59126	0.80379	677.4	0.00614	0.00524	0.00493	0.005
677.3	0.73715	0.41544	0.70439	0.70078	677.3	0.00617	0.00529	0.00494	0.00499
677.2	0.60575	0.40732	0.82276	0.63175	677.2	0.00622	0.00528	0.00499	0.00501
677.1	0.64786	0.43568	0.82881	0.71667	677.1	0.00619	0.00529	0.00499	0.00501
677	0.77809	0.42588	0.73502	0.75417	677	0.0062	0.00527	0.00499	0.00508
676.9	0.68917	0.47891	0.50281	0.73375	676.9	0.00618	0.0053	0.00498	0.00508
676.8	0.73586	0.37781	0.53129	0.85782	676.8	0.00619	0.00531	0.00495	0.00508
676.7	0.61061	0.37726	0.56131	0.85375	676.7	0.00622	0.00529	0.00493	0.00509
676.6	0.5268	0.33432	0.45999	0.80359	676.6	0.00624	0.00529	0.00489	0.00506
676.5	0.51308	0.32446	0.47922	0.83978	676.5	0.0062	0.00529	0.00489	0.00511
676.4	0.54722	0.25249	0.53356	0.75559	676.4	0.00621	0.00528	0.00491	0.00513
676.3	0.45009	0.26328	0.49741	0.82166	676.3	0.0062	0.00529	0.0049	0.00514
676.2	0.60736	0.32197	0.66549	0.7209	676.2	0.0062	0.0053	0.00493	0.00512
676.1	0.59635	0.29616	0.54191	0.83167	676.1	0.00624	0.00529	0.00492	0.0051
676	0.50744	0.3458	0.37624	0.67517	676	0.0062	0.00529	0.00492	0.00509
675.9	0.44791	0.43872	0.5868	0.61242	675.9	0.00623	0.00527	0.00493	0.0051
675.8	0.40516	0.4983	0.63874	0.625	675.8	0.00627	0.00527	0.00492	0.00511
675.7	0.59818	0.45388	0.62381	0.55539	675.7	0.00625	0.00528	0.00493	0.00513
675.6	0.66585	0.55899	0.58026	0.45971	675.6	0.0063	0.00529	0.00493	0.00512
675.5	0.69087	0.56859	0.62557	0.55592	675.5	0.00626	0.0053	0.00494	0.00514
675.4	0.63441	0.46602	0.60001	0.53292	675.4	0.00624	0.00532	0.00494	0.00516
675.3	0.44324	0.48537	0.57147	0.60554	675.3	0.00624	0.00531	0.00493	0.00517
675.2	0.35185	0.54307	0.62011	0.60916	675.2	0.00624	0.00531	0.00495	0.00516
675.1	0.29467	0.71467	0.65335	0.54098	675.1	0.00629	0.00531	0.00496	0.00515
675	0.38655	0.62553	0.51918	0.4214	675	0.00632	0.00527	0.00498	0.00516
674.9	0.40703	0.73099	0.525	0.27955	674.9	0.00629	0.00528	0.00499	0.0052
674.8	0.37623	0.72536	0.26719	0.22087	674.8	0.00631	0.00528	0.005	0.00519
674.7	0.36049	0.7874	0.37219	0.09664	674.7	0.00633	0.00532	0.00498	0.00522
674.6	0.23111	0.75072	0.39065	0.11241	674.6	0.00635	0.00533	0.00498	0.00522
674.5	0.35847	0.8221	0.35427	0.00103	674.5	0.00637	0.00535	0.005	0.00522
674.4	0.28447	0.85781	0.35341	-0.01914	674.4	0.00639	0.00534	0.00502	0.00525
674.3	0.1092	0.83013	0.52726	0.29708	674.3	0.00642	0.00538	0.00503	0.00528
674.2	0.16813	0.90279	0.53392	0.23507	674.2	0.00641	0.00539	0.00503	0.00531
674.1	0.19797	0.9136	0.50355	0.33193	674.1	0.00642	0.00539	0.005	0.0053
674	0.36147	0.86951	0.57072	0.36942	674	0.00643	0.00541	0.00503	0.00532
673.9	0.1467	0.82972	0.58854	0.30365	673.9	0.00645	0.00543	0.00505	0.00532
673.8	0.33524	0.71201	0.43395	0.31916	673.8	0.00644	0.00546	0.00507	0.00531
673.7	0.48298	0.75759	0.41423	0.2325	673.7	0.0065	0.00545	0.00509	0.00533
673.6	0.52446	0.59876	0.524	0.33394	673.6	0.00652	0.00546	0.0051	0.00534
673.5	0.60247	0.54236	0.58037	0.25112	673.5	0.0065	0.00549	0.00511	0.00535
673.4	0.4791	0.46477	0.62956	0.31256	673.4	0.00653	0.00548	0.0051	0.00532
673.3	0.4849	0.48421	0.59879	0.37009	673.3	0.00654	0.00548	0.00513	0.00532
673.2	0.49787	0.49931	0.81226	0.34478	673.2	0.00657	0.00551	0.00509	0.00532
673.1	0.65935	0.70204	0.75768	0.31818	673.1	0.0066	0.00552	0.00508	0.00531
673	0.51759	0.63762	0.64176	0.26296	673	0.00659	0.00552	0.00506	0.00529
672.9	0.70171	0.61646	0.83211	0.34703	672.9	0.00663	0.00549	0.0051	0.00532
672.8	0.57258	0.62171	0.75733	0.43685	672.8	0.00664	0.00552	0.00509	0.00533
672.7	0.57973	0.64238	0.63537	0.56326	672.7	0.00663	0.00555	0.0051	0.00534
672.6	0.40891	0.59859	0.65929	0.69628	672.6	0.00663	0.00556	0.00511	0.00534
672.5	0.41627	0.47526	0.63247	0.83673	672.5	0.00663	0.00557	0.00511	0.00534
672.4	0.49336	0.37475	0.60353	0.79992	672.4	0.00666	0.00558	0.00514	0.00535
672.3	0.38511	0.351	0.59333	0.72249	672.3	0.00667	0.00558	0.00514	0.00537
672.2	0.36668	0.32853	0.61365	0.69405	672.2	0.00672	0.00557	0.00514	0.00534
672.1	0.34125	0.31307	0.78032	0.5653	672.1	0.00674	0.00559	0.00516	0.00533
672	0.521	0.27557	0.6297	0.51953	672	0.00674	0.00561	0.00514	0.00536
671.9	0.48269	0.30831	0.47441	0.63151	671.9	0.00676	0.00564	0.00516	0.00538
671.8	0.51261	0.15238	0.61773	0.83338	671.8	0.00678	0.00567	0.00511	0.00536
671.7	0.42589	0.24344	0.75544	0.95413	671.7	0.00682	0.0057	0.00512	0.00537
671.6	0.48259	0.13251	0.73796	0.87711	671.6	0.00681	0.00568	0.00514	0.00539
671.5	0.47259	0.03545	0.70692	0.90308	671.5	0.00683	0.00569	0.00514	0.00539
671.4	0.35126	0.06706	0.78192	0.80303	671.4	0.00682	0.00568	0.00513	0.0054
671.3	0.29107	0.05457	0.84154	0.79603	671.3	0.00686	0.00566	0.00514	0.0054
671.2	0.37891	0.07981	0.94008	0.77873	671.2	0.00686	0.00569	0.00514	0.00541
671.1	0.50008	-0.09465	0.81335	0.72814	671.1	0.00685	0.00567	0.00515	0.00542
671	0.30109	-0.14823	0.80621	0.77476	671	0.00686	0.00567	0.0052	0.00542
670.9	0.40033	-0.10468	0.74428	0.66017	670.9	0.00688	0.00566	0.00518	0.00544
670.8	0.19177	-0.09793	0.70346	0.55346	670.8	0.00689	0.00567	0.00517	0.00543
670.7	0.36844	-0.04767	0.73415	0.68973	670.7	0.00689	0.00563	0.00516	0.00541
670.6	0.26379	-0.02176	0.8553	0.68727	670.6	0.00691	0.00565	0.00516	0.00543
670.5	0.20763	0.01	1.05996	0.71049	670.5	0.0069	0.00565	0.00516	0.00545
670.4	0.26137	0.1781	0.96708	0.69274	670.4	0.0069	0.00567	0.00516	0.00544
670.3	0.27784	0.24581	0.98864	0.642	670.3	0.00691	0.00566	0.00517	0.00547
670.2	0.21624	0.3095	1.01033	0.50877	670.2	0.00694	0.00569	0.00519	0.00548
670.1	0.24995	0.1822	1.03733	0.51752	670.1	0.00693	0.00569	0.00519	0.00549
670	0.32444	0.14266	0.98107	0.47191	670	0.00693	0.0057	0.00518	0.00551
669.9	0.29375	0.10691	1.04844	0.44539	669.9	0.00694	0.00568	0.00518	0.00551
669.8	0.38387	0.20003	1.04965	0.4166	669.8	0.00698	0.00571	0.00521	0.00554
669.7	0.40074	0.17339	1.13917	0.41131	669.7	0.00697	0.00572	0.00518	0.00551
669.6	0.60986	0.23407	1.04223	0.33499	669.6	0.00699	0.00575	0.00521	0.00549
669.5	0.67426	0.08984	1.13908	0.31373	669.5	0.00698	0.0057	0.0052	0.00549
669.4	0.5473	0.19368	1.05851	0.17789	669.4	0.00699	0.00573	0.00525	0.00546
669.3	0.43584	0.20233	1.04381	0.20565	669.3	0.007	0.00573	0.00527	0.0055
669.2	0.33783	0.28798	0.98642	0.30464	669.2	0.007	0.00574	0.00527	0.00553
669.1	0.26511	0.17349	0.95915	0.27369	669.1	0.007	0.00576	0.00529	0.00551
669	0.40633	0.21892	0.872	0.29674	669	0.00701	0.00583	0.00532	0.00553
668.9	0.66076	0.23389	0.79012	0.1645	668.9	0.00703	0.00584	0.00532	0.00554
668.8	0.5121	0.19059	0.53038	0.16051	668.8	0.00703	0.00581	0.0053	0.00555
668.7	0.35449	0.28132	0.44599	0.21984	668.7	0.00702	0.0058	0.00528	0.00555
668.6	0.43567	0.24903	0.53572	0.19506	668.6	0.007	0.00581	0.00533	0.00553
668.5	0.47254	0.31292	0.46208	0.28696	668.5	0.00701	0.00581	0.00536	0.00553
668.4	0.43802	0.32483	0.3957	0.12053	668.4	0.007	0.00581	0.00534	0.00557
668.3	0.56459	0.46249	0.45178	0.17914	668.3	0.007	0.00582	0.00533	0.00555
668.2	0.47559	0.45215	0.49039	0.22317	668.2	0.007	0.00584	0.0053	0.00557
668.1	0.49949	0.40807	0.40669	0.26658	668.1	0.00703	0.00587	0.00531	0.00554
668	0.32575	0.26188	0.42025	0.26502	668	0.00703	0.00592	0.00531	0.00558
667.9	0.3832	0.24961	0.25835	0.25924	667.9	0.00704	0.00593	0.00534	0.00557
667.8	0.51802	0.33083	0.27233	0.22975	667.8	0.00702	0.00596	0.00538	0.00557
667.7	0.70094	0.42892	0.11789	0.29426	667.7	0.00705	0.006	0.00539	0.00559
667.6	0.64375	0.39504	0.15907	0.40779	667.6	0.00706	0.00601	0.00541	0.0056
667.5	0.62493	0.34216	0.20594	0.46099	667.5	0.00706	0.00602	0.00543	0.00559
667.4	0.71717	0.31795	0.34541	0.42795	667.4	0.00708	0.00606	0.00538	0.00562
667.3	0.62639	0.31961	0.42326	0.36433	667.3	0.00708	0.00602	0.0054	0.00563
667.2	0.59432	0.27092	0.41291	0.36585	667.2	0.00709	0.00599	0.00544	0.00564
667.1	0.42793	0.3659	0.38606	0.34764	667.1	0.00711	0.00599	0.00542	0.00564
667	0.3748	0.54742	0.37571	0.41489	667	0.00712	0.00601	0.00541	0.00562
666.9	0.47624	0.57657	0.42149	0.45516	666.9	0.00714	0.00603	0.00545	0.00566
666.8	0.3688	0.48611	0.50082	0.55959	666.8	0.00713	0.00603	0.00546	0.00565
666.7	0.41191	0.46313	0.44581	0.54528	666.7	0.00714	0.00602	0.0055	0.00566
666.6	0.418	0.38771	0.33369	0.6063	666.6	0.00711	0.00603	0.0055	0.00569
666.5	0.30101	0.39737	0.26433	0.55813	666.5	0.00713	0.00606	0.00556	0.0057
666.4	0.20231	0.30757	0.38061	0.54127	666.4	0.00714	0.00608	0.0056	0.00571
666.3	0.15345	0.40619	0.40698	0.60842	666.3	0.00714	0.0061	0.00561	0.00575
666.2	0.02281	0.27173	0.32466	0.51479	666.2	0.00714	0.00611	0.00562	0.00576
666.1	0.11108	0.42236	0.31192	0.46152	666.1	0.00716	0.00614	0.00567	0.00577
666	0.24939	0.4329	0.26472	0.48098	666	0.00717	0.00614	0.00566	0.0058
665.9	0.39086	0.58574	0.25831	0.54672	665.9	0.00721	0.00615	0.00566	0.00581
665.8	0.46196	0.61036	0.22561	0.39115	665.8	0.00721	0.00614	0.00564	0.00582
665.7	0.57931	0.7627	0.27192	0.31781	665.7	0.00724	0.00614	0.00565	0.00585
665.6	0.57129	0.66153	0.39393	0.19117	665.6	0.00725	0.00611	0.00564	0.00583
665.5	0.37568	0.78273	0.37906	0.35555	665.5	0.00725	0.00611	0.00565	0.00583
665.4	0.3805	0.77661	0.42821	0.3191	665.4	0.00726	0.0061	0.00567	0.00584
665.3	0.36297	0.94297	0.68652	0.37161	665.3	0.00728	0.0061	0.00569	0.00586
665.2	0.46239	0.90876	0.74923	0.43607	665.2	0.00731	0.0061	0.00566	0.00589
665.1	0.47996	0.8835	0.81405	0.49797	665.1	0.00731	0.00613	0.00566	0.00589
665	0.55516	0.93277	0.84495	0.50023	665	0.00732	0.00613	0.00568	0.00584
664.9	0.34197	0.76322	0.66312	0.55494	664.9	0.00738	0.00614	0.00572	0.00585
664.8	0.35154	0.82106	0.57503	0.38961	664.8	0.00741	0.00614	0.00575	0.00584
664.7	0.29341	0.85634	0.65655	0.48988	664.7	0.00742	0.00613	0.00577	0.00588
664.6	0.50206	0.95656	0.69473	0.47354	664.6	0.00745	0.0061	0.00574	0.00591
664.5	0.42449	0.93326	0.76839	0.51179	664.5	0.00742	0.00607	0.00571	0.00592
664.4	0.35167	0.8782	0.71375	0.50441	664.4	0.00744	0.00608	0.0057	0.00595
664.3	0.47727	0.76403	0.7791	0.53487	664.3	0.00745	0.00608	0.00565	0.00592
664.2	0.31824	0.8473	0.67018	0.54927	664.2	0.00744	0.00609	0.00565	0.00591
664.1	0.39777	1.03602	0.70854	0.51733	664.1	0.00744	0.00611	0.00567	0.00592
664	0.29121	0.95703	0.65292	0.53303	664	0.00743	0.00612	0.0057	0.00591
663.9	0.34743	1.13194	0.76108	0.53681	663.9	0.00743	0.00614	0.00569	0.00591
663.8	0.35789	1.0999	0.68821	0.68468	663.8	0.00747	0.00619	0.0057	0.0059
663.7	0.33542	1.05195	0.71617	0.80645	663.7	0.00748	0.00619	0.00574	0.00593
663.6	0.33984	0.82283	0.85542	0.77911	663.6	0.00749	0.0062	0.00576	0.00594
663.5	0.24456	0.67986	0.76445	0.6884	663.5	0.00749	0.00622	0.00575	0.00594
663.4	0.24464	0.7763	0.59895	0.7646	663.4	0.00747	0.00623	0.00572	0.00598
663.3	0.18708	0.86068	0.58538	0.75288	663.3	0.00748	0.00628	0.00571	0.00599
663.2	0.11415	0.86001	0.53464	0.66537	663.2	0.00751	0.00629	0.00572	0.00596
663.1	0.20337	0.78838	0.53007	0.63526	663.1	0.00751	0.00631	0.00573	0.00598
663	0.15786	0.62675	0.56142	0.74685	663	0.00751	0.00632	0.0057	0.00598
662.9	0.21451	0.55648	0.37581	0.82006	662.9	0.00752	0.00632	0.00573	0.00597
662.8	0.05547	0.6814	0.32682	0.83905	662.8	0.00752	0.00636	0.00572	0.00599
662.7	0.08284	0.55416	0.4674	0.91404	662.7	0.00753	0.0064	0.00568	0.00603
662.6	-0.07937	0.51965	0.27471	0.99513	662.6	0.00751	0.00641	0.00569	0.00602
662.5	0.03348	0.38685	0.27006	0.80652	662.5	0.00748	0.0064	0.00573	0.00604
662.4	0.15278	0.4575	0.32524	0.76636	662.4	0.00752	0.00644	0.00575	0.00603
662.3	0.07574	0.4362	0.33198	0.67639	662.3	0.00753	0.00641	0.00574	0.00603
662.2	0.07723	0.50177	0.36139	0.64735	662.2	0.00756	0.00643	0.00574	0.00606
662.1	0.28366	0.47342	0.35019	0.54747	662.1	0.00755	0.00644	0.00576	0.00605
662	0.31104	0.4847	0.53121	0.56335	662	0.00753	0.00649	0.00576	0.00605
661.9	0.45083	0.27665	0.5485	0.43929	661.9	0.00751	0.00652	0.00576	0.00607
661.8	0.4053	0.47438	0.50251	0.38795	661.8	0.00751	0.00652	0.00579	0.0061
661.7	0.33802	0.37533	0.43746	0.33753	661.7	0.00751	0.0065	0.0058	0.0061
661.6	0.30524	0.26655	0.56934	0.31207	661.6	0.00753	0.00652	0.00581	0.00614
661.5	0.35629	0.35741	0.5303	0.32112	661.5	0.00752	0.00651	0.00579	0.00613
661.4	0.41252	0.2814	0.46972	0.39752	661.4	0.00752	0.00652	0.0058	0.00615
661.3	0.46828	0.3162	0.3059	0.36239	661.3	0.00752	0.00654	0.00578	0.00616
661.2	0.53823	0.32505	0.2849	0.39481	661.2	0.00752	0.00655	0.0058	0.00612
661.1	0.41091	0.20555	0.14041	0.39968	661.1	0.00754	0.00656	0.00582	0.00614
661	0.35342	0.25984	0.12332	0.28426	661	0.00756	0.00659	0.00582	0.00615
660.9	0.26746	0.21886	0.24273	0.12765	660.9	0.00758	0.00657	0.00587	0.00618
660.8	0.53745	0.10011	0.28338	0.06096	660.8	0.00761	0.00657	0.00588	0.00622
660.7	0.52591	0.0126	0.23385	-0.03563	660.7	0.00765	0.00658	0.00584	0.00625
660.6	0.58402	-0.14781	0.05329	-0.08517	660.6	0.00769	0.0066	0.00584	0.00626
660.5	0.56509	-0.08375	0.0525	-0.02778	660.5	0.00769	0.00661	0.00584	0.00627
660.4	0.51802	-0.06346	0.09912	-0.0714	660.4	0.00771	0.00663	0.00585	0.00629
660.3	0.61896	0.01467	0.06091	-0.08857	660.3	0.00769	0.00668	0.00589	0.00626
660.2	0.60581	0.07908	0.13138	-0.14172	660.2	0.0077	0.00665	0.00586	0.00625
660.1	0.67434	0.25038	0.11332	-0.08938	660.1	0.00774	0.00668	0.00591	0.00625
660	0.83401	0.27598	0.284	-0.00637	660	0.00778	0.00664	0.00588	0.00624
659.9	0.85687	0.27832	0.28136	-0.06824	659.9	0.00779	0.00663	0.00589	0.00625
659.8	1.03616	0.2185	0.14906	0.03463	659.8	0.00781	0.00664	0.0059	0.00623
659.7	0.95827	0.41802	0.16167	-0.09728	659.7	0.00782	0.00663	0.0059	0.00626
659.6	1.00518	0.5926	0.20506	-0.14043	659.6	0.00784	0.00658	0.00592	0.00629
659.5	1.06878	0.72183	0.22914	-0.03908	659.5	0.00786	0.00654	0.00592	0.00631
659.4	1.0028	0.84775	0.33788	0.09663	659.4	0.00788	0.00649	0.00594	0.00631
659.3	1.27111	0.7644	0.41252	0.12056	659.3	0.00791	0.00647	0.00595	0.00633
659.2	1.22612	0.82894	0.53501	0.20791	659.2	0.00791	0.00652	0.00599	0.00631
659.1	1.18364	0.65087	0.43051	0.42943	659.1	0.00787	0.00652	0.006	0.00632
659	1.12623	0.67994	0.47737	0.74829	659	0.00788	0.00656	0.00602	0.00634
658.9	1.19545	0.55005	0.5159	0.78631	658.9	0.00788	0.0066	0.00604	0.00632
658.8	1.05207	0.56091	0.48204	0.85198	658.8	0.00787	0.00663	0.00605	0.00636
658.7	1.1686	0.55801	0.59701	0.92526	658.7	0.0079	0.00664	0.00606	0.00638
658.6	1.01233	0.65548	0.48285	0.99256	658.6	0.00787	0.00667	0.00606	0.00638
658.5	0.96146	0.47449	0.45632	0.97768	658.5	0.00789	0.00666	0.00604	0.00637
658.4	0.79157	0.51421	0.53695	0.83945	658.4	0.00789	0.00669	0.00606	0.00638
658.3	0.95114	0.62315	0.44234	0.86546	658.3	0.00789	0.00672	0.00606	0.00639
658.2	0.98648	0.73698	0.60734	0.83088	658.2	0.00791	0.00677	0.0061	0.00639
658.1	1.09818	0.7204	0.59727	0.99264	658.1	0.00791	0.00678	0.00614	0.00641
658	1.04345	0.79199	0.63606	0.92533	658	0.00793	0.00681	0.00615	0.00643
657.9	1.05915	0.72004	0.80428	0.86064	657.9	0.00795	0.00684	0.00619	0.00644
657.8	1.1762	0.71046	0.84076	0.91842	657.8	0.00799	0.00685	0.00619	0.00642
657.7	1.21992	0.73818	0.88881	0.94805	657.7	0.00801	0.00687	0.00622	0.00644
657.6	1.19199	0.78582	0.72731	1.22932	657.6	0.00802	0.00688	0.00626	0.00646
657.5	1.13827	0.78431	0.73054	1.28897	657.5	0.00801	0.00688	0.00625	0.00646
657.4	1.17254	0.85455	0.76307	1.41092	657.4	0.00802	0.00691	0.00629	0.00649
657.3	1.2237	0.88294	0.78728	1.35825	657.3	0.00805	0.00688	0.0063	0.00649
657.2	1.23542	0.70002	0.76234	1.40326	657.2	0.00804	0.00688	0.00632	0.00649
657.1	1.05632	0.7585	0.6877	1.39311	657.1	0.00804	0.00689	0.00634	0.00648
657	1.00873	0.70054	0.5097	1.40317	657	0.00806	0.0069	0.00634	0.00651
656.9	1.12426	0.62242	0.57153	1.4213	656.9	0.00807	0.00691	0.00636	0.00655
656.8	1.01918	0.67561	0.57897	1.43509	656.8	0.00809	0.00695	0.00636	0.00656
656.7	1.02057	0.70949	0.54763	1.47018	656.7	0.0081	0.00695	0.0064	0.00658
656.6	1.12664	0.74701	0.68155	1.38932	656.6	0.00811	0.00695	0.00643	0.00662
656.5	0.96336	0.8071	0.84065	1.26215	656.5	0.00812	0.00697	0.0064	0.00663
656.4	1.02098	0.7905	0.88564	1.1682	656.4	0.00816	0.00701	0.0064	0.00664
656.3	0.93427	0.72548	0.88957	1.10124	656.3	0.00815	0.00706	0.00641	0.00665
656.2	0.83919	0.58923	0.80015	1.00911	656.2	0.00815	0.00713	0.00641	0.00666
656.1	0.70511	0.64489	0.69142	0.99549	656.1	0.00816	0.00714	0.00641	0.00667
656	0.44199	0.64569	0.52362	0.987	656	0.0082	0.0071	0.00644	0.0067
655.9	0.46678	0.77895	0.55991	0.89723	655.9	0.00821	0.00707	0.00641	0.00674
655.8	0.48079	0.74626	0.59514	0.76552	655.8	0.00824	0.00705	0.00643	0.00674
655.7	0.50677	0.76413	0.42107	0.66334	655.7	0.00823	0.00706	0.00645	0.00677
655.6	0.51333	0.91248	0.40211	0.69385	655.6	0.00828	0.00707	0.00649	0.00673
655.5	0.47957	0.83788	0.23331	0.7847	655.5	0.00828	0.00707	0.00648	0.00677
655.4	0.36155	0.7247	0.22824	0.85698	655.4	0.00831	0.00706	0.00651	0.00678
655.3	0.27095	0.74711	0.48287	0.94066	655.3	0.00835	0.00707	0.00647	0.00677
655.2	0.46306	0.8101	0.37416	1.23342	655.2	0.00836	0.00708	0.00649	0.00678
655.1	0.54327	0.81458	0.23612	1.26209	655.1	0.00838	0.00709	0.00647	0.00677
655	0.52052	0.91369	0.18632	1.33636	655	0.00841	0.00709	0.00648	0.00679
654.9	0.35599	0.6792	0.24946	1.30924	654.9	0.00841	0.0071	0.00647	0.00679
654.8	0.18882	0.92699	0.42419	1.223	654.8	0.00843	0.00708	0.00645	0.00679
654.7	0.21883	0.75148	0.44823	1.24472	654.7	0.00841	0.00708	0.00648	0.0068
654.6	0.11559	0.76933	0.28841	1.17632	654.6	0.00841	0.00712	0.00648	0.0068
654.5	0.00487	0.8472	0.29338	1.29161	654.5	0.0084	0.00713	0.00653	0.00683
654.4	-0.03788	0.81198	0.22091	1.2331	654.4	0.00842	0.00716	0.00653	0.00682
654.3	-0.17664	0.92481	0.32781	1.10031	654.3	0.00842	0.00718	0.00653	0.00683
654.2	-0.21617	0.78979	0.31079	1.09534	654.2	0.00844	0.00719	0.00658	0.00682
654.1	-0.1045	0.99467	0.29389	1.29802	654.1	0.00843	0.00716	0.0066	0.00682
654	0.00659	1.00324	0.18253	1.18874	654	0.00844	0.00721	0.0066	0.00686
653.9	0.11436	1.25037	0.31357	1.15154	653.9	0.00846	0.00722	0.00658	0.00687
653.8	0.22932	1.11451	0.25233	1.03234	653.8	0.00848	0.00722	0.00659	0.00685
653.7	0.26742	1.11956	0.30256	0.88976	653.7	0.00849	0.00727	0.00659	0.0069
653.6	0.21276	1.02913	0.09752	0.9591	653.6	0.00851	0.00729	0.00658	0.00687
653.5	0.28125	0.90187	0.11152	0.96608	653.5	0.00852	0.00732	0.00656	0.00687
653.4	0.08743	0.77671	0.19106	1.10037	653.4	0.00852	0.00734	0.00657	0.00687
653.3	0.19583	0.78803	0.16726	1.2042	653.3	0.00852	0.00735	0.00658	0.00689
653.2	0.22791	0.64377	0.02939	1.43962	653.2	0.00853	0.00735	0.0066	0.00687
653.1	0.24048	0.5934	0.19815	1.40721	653.1	0.00853	0.00734	0.00666	0.00688
653	0.54329	0.58799	0.10814	1.53293	653	0.00855	0.00734	0.00665	0.0069
652.9	0.54183	0.63928	0.24901	1.47965	652.9	0.00858	0.0073	0.00662	0.00689
652.8	0.69049	0.51939	0.56939	1.37118	652.8	0.0086	0.00733	0.00664	0.00692
652.7	0.86086	0.42352	0.7235	1.43689	652.7	0.00862	0.00739	0.00664	0.00692
652.6	0.80717	0.34247	0.89552	1.30952	652.6	0.00864	0.00742	0.00667	0.0069
652.5	0.72398	0.21961	0.75454	1.39388	652.5	0.00865	0.00745	0.00667	0.00687
652.4	0.77634	0.24903	0.89337	1.47803	652.4	0.00866	0.00746	0.00667	0.00687
652.3	0.73312	0.02906	0.80311	1.50953	652.3	0.00866	0.00748	0.00666	0.00692
652.2	0.71031	0.12487	0.8229	1.47773	652.2	0.00869	0.00748	0.00668	0.00694
652.1	1.02423	0.26567	0.73561	1.34386	652.1	0.0087	0.00751	0.0067	0.00695
652	1.30848	0.35035	0.63391	1.2852	652	0.00871	0.00751	0.00675	0.00697
651.9	1.18172	0.27696	0.77107	1.103	651.9	0.00874	0.00754	0.00677	0.007
651.8	1.023	0.28963	0.89673	1.22983	651.8	0.00877	0.00754	0.00678	0.007
651.7	0.92104	0.39243	0.9838	1.11534	651.7	0.00876	0.00753	0.00675	0.00704
651.6	1.00605	0.55392	0.88102	1.14824	651.6	0.0088	0.00752	0.00677	0.00705
651.5	0.97083	0.5549	0.86318	1.02732	651.5	0.00881	0.00753	0.00682	0.00707
651.4	0.92361	0.63858	0.83338	1.07673	651.4	0.00883	0.00753	0.00682	0.00707
651.3	0.85486	0.72558	0.77903	1.06192	651.3	0.00885	0.00752	0.00684	0.00709
651.2	0.9827	0.87305	0.65312	1.08893	651.2	0.00887	0.00753	0.00681	0.0071
651.1	1.02829	0.89149	0.68882	1.24189	651.1	0.00888	0.00749	0.0068	0.00714
651	1.05831	0.91042	0.64031	1.32926	651	0.00888	0.00752	0.00681	0.00715
650.9	0.97501	1.00871	0.59774	1.23485	650.9	0.00891	0.00752	0.00684	0.00717
650.8	0.87499	0.99632	0.51414	1.10945	650.8	0.00894	0.00753	0.00685	0.00719
650.7	0.88223	0.80241	0.61083	1.17723	650.7	0.00896	0.00754	0.00688	0.0072
650.6	0.95279	0.61554	0.5805	1.04806	650.6	0.00896	0.00751	0.00689	0.00719
650.5	0.82632	0.68449	0.82558	1.15742	650.5	0.00897	0.00751	0.00693	0.00723
650.4	0.87181	0.64157	0.89072	1.23857	650.4	0.00901	0.00749	0.00692	0.00725
650.3	0.8822	0.66688	0.87741	1.3354	650.3	0.00901	0.00748	0.00695	0.00724
650.2	0.66457	0.76674	0.88351	1.2095	650.2	0.00903	0.00747	0.007	0.00726
650.1	0.77284	0.87165	0.74605	1.17823	650.1	0.00902	0.00749	0.00701	0.00727
650	0.70283	0.7545	0.60386	1.17212	650	0.00906	0.00747	0.00702	0.00727
649.9	0.77014	0.8764	0.63765	0.99807	649.9	0.00908	0.00752	0.00705	0.0073
649.8	0.70416	0.92359	0.40856	0.98986	649.8	0.00908	0.00752	0.00706	0.00732
649.7	0.45594	0.88684	0.59692	0.91792	649.7	0.00912	0.00757	0.00706	0.00734
649.6	0.44497	0.96587	0.61513	0.64018	649.6	0.00912	0.00757	0.00708	0.00733
649.5	0.48317	1.1272	0.56459	0.73217	649.5	0.00911	0.00759	0.00709	0.0073
649.4	0.40398	1.21319	0.4089	0.85641	649.4	0.00909	0.00762	0.00712	0.00733
649.3	0.42245	1.30691	0.36838	0.95601	649.3	0.00912	0.00763	0.00714	0.00736
649.2	0.41015	1.31664	0.45112	0.81435	649.2	0.00915	0.00764	0.00714	0.00742
649.1	0.32913	1.19689	0.38383	0.65787	649.1	0.00919	0.00766	0.00716	0.00742
649	0.4497	1.31612	0.3282	0.62219	649	0.00918	0.00768	0.00719	0.00745
648.9	0.4324	1.36341	0.41477	0.58414	648.9	0.0092	0.0077	0.0072	0.00747
648.8	0.27039	1.32535	0.52383	0.55306	648.8	0.00919	0.00773	0.00722	0.0075
648.7	0.11818	1.25301	0.55654	0.6329	648.7	0.00919	0.00773	0.0072	0.00748
648.6	0.10666	1.2265	0.59461	0.71769	648.6	0.00923	0.00773	0.00724	0.00748
648.5	0.10737	1.34112	0.56935	0.71691	648.5	0.0092	0.00775	0.00727	0.0075
648.4	0.21854	1.26354	0.55908	0.61663	648.4	0.00921	0.00775	0.00728	0.00749
648.3	0.44898	1.33838	0.657	0.48146	648.3	0.00921	0.00779	0.00733	0.0075
648.2	0.26687	1.25043	0.57614	0.6223	648.2	0.00923	0.00784	0.00729	0.00753
648.1	0.21861	1.20912	0.66857	0.67659	648.1	0.00926	0.00784	0.0073	0.0075
648	0.22339	1.46872	0.70188	0.64578	648	0.00929	0.00783	0.00726	0.00753
647.9	0.35661	1.21959	0.79797	0.62359	647.9	0.00929	0.00784	0.00724	0.00754
647.8	0.12293	1.18531	0.69946	0.64247	647.8	0.00932	0.00786	0.00724	0.00755
647.7	0.08744	1.11314	0.75822	0.44774	647.7	0.00935	0.0079	0.00724	0.00755
647.6	0.13578	1.16359	0.93018	0.55542	647.6	0.00934	0.00789	0.0072	0.00754
647.5	0.13488	1.28704	0.90621	0.46906	647.5	0.00933	0.0079	0.00722	0.00754
647.4	0.09198	1.26	0.78731	0.62038	647.4	0.00934	0.00794	0.00722	0.00754
647.3	0.07668	1.38815	0.74487	0.66835	647.3	0.00932	0.00792	0.00725	0.00756
647.2	0.00515	1.56821	0.81637	0.85207	647.2	0.00937	0.00795	0.00726	0.00754
647.1	0.00799	1.62787	0.64974	0.73591	647.1	0.00938	0.00797	0.0073	0.00754
647	-0.08029	1.45054	0.51626	0.64374	647	0.0094	0.00798	0.00729	0.00759
646.9	0.20286	1.6047	0.48497	0.87429	646.9	0.0094	0.00801	0.00728	0.00762
646.8	0.06243	1.51082	0.52215	0.96991	646.8	0.00943	0.00801	0.00724	0.00766
646.7	0.24066	1.59877	0.49874	0.92751	646.7	0.00943	0.00801	0.00728	0.00766
646.6	0.06858	1.7347	0.57534	1.06695	646.6	0.00944	0.00806	0.0073	0.00771
646.5	0.12097	1.73732	0.54451	1.05063	646.5	0.00947	0.00807	0.00734	0.00773
646.4	0.03234	1.52989	0.59543	1.38737	646.4	0.00948	0.00807	0.00731	0.00776
646.3	0.09552	1.48995	0.39683	1.46311	646.3	0.00949	0.00808	0.00731	0.00776
646.2	0.03266	1.40283	0.27173	1.56809	646.2	0.00951	0.00806	0.00732	0.00779
646.1	0.03905	1.32854	0.27963	1.52916	646.1	0.00956	0.00804	0.00733	0.00779
646	0.14838	1.39073	0.26872	1.57047	646	0.00956	0.00805	0.0073	0.0078
645.9	-0.0074	1.46523	0.35552	1.6712	645.9	0.00957	0.00805	0.00732	0.00778
645.8	-0.02685	1.47772	0.11067	1.64429	645.8	0.00958	0.00803	0.00732	0.00778
645.7	0.16284	1.6044	0.21614	1.86971	645.7	0.00961	0.00804	0.0073	0.00782
645.6	0.11853	1.48235	0.36965	1.7305	645.6	0.00965	0.00805	0.00729	0.0078
645.5	0.08713	1.58748	0.31326	1.68836	645.5	0.00969	0.00806	0.00727	0.0078
645.4	0.00127	1.64454	0.01103	1.73854	645.4	0.00973	0.00805	0.00731	0.00783
645.3	-0.17403	1.57891	0.10694	1.59676	645.3	0.00977	0.00809	0.00732	0.00784
645.2	-0.15298	1.51	0.09583	1.59299	645.2	0.00975	0.00808	0.00731	0.00786
645.1	-0.11063	1.50561	0.02332	1.45256	645.1	0.00976	0.00808	0.00733	0.00787
645	-0.20981	1.2411	0.07926	1.65856	645	0.00978	0.0081	0.00733	0.00789
644.9	-0.12659	1.22941	0.09479	1.82121	644.9	0.00979	0.00808	0.00732	0.00792
644.8	0.14554	1.1919	-0.06471	1.66994	644.8	0.00982	0.00805	0.00739	0.00795
644.7	0.26475	1.30833	0.05638	1.72291	644.7	0.00985	0.0081	0.0074	0.00798
644.6	0.2213	1.12803	0.22663	1.59491	644.6	0.00984	0.0081	0.00743	0.00797
644.5	0.18809	1.23583	0.25908	1.69255	644.5	0.00988	0.00815	0.00747	0.00797
644.4	0.36934	1.22639	0.26991	1.57017	644.4	0.00988	0.00813	0.00749	0.00799
644.3	0.35705	1.2632	0.16398	1.57622	644.3	0.00989	0.00817	0.00749	0.00803
644.2	0.35318	1.0485	0.12102	1.53341	644.2	0.0099	0.00817	0.0075	0.00805
644.1	0.2769	0.98617	0.25899	1.588	644.1	0.00994	0.00817	0.00751	0.00806
644	0.18044	1.15407	0.18413	1.57491	644	0.00998	0.0082	0.0075	0.0081
643.9	0.24861	1.16973	0.34638	1.51319	643.9	0.01002	0.00825	0.0075	0.00812
643.8	0.50547	1.39709	0.40669	1.49419	643.8	0.01002	0.00824	0.00751	0.00815
643.7	0.41798	1.41318	0.31723	1.56014	643.7	0.01002	0.00822	0.0075	0.00812
643.6	0.55806	1.41606	0.52609	1.36783	643.6	0.01003	0.00825	0.00753	0.00815
643.5	0.42118	1.42341	0.78457	1.16448	643.5	0.01004	0.00828	0.00757	0.00816
643.4	0.22206	1.35273	0.94235	1.15066	643.4	0.01006	0.00832	0.00762	0.00816
643.3	0.15313	1.24498	0.93065	1.05414	643.3	0.01009	0.00833	0.00759	0.00816
643.2	-0.0616	1.0715	1.01998	1.15849	643.2	0.01007	0.00832	0.0076	0.00817
643.1	-0.01442	1.06728	0.91628	1.12255	643.1	0.0101	0.00835	0.00758	0.00817
643	-0.05671	1.12047	0.77388	1.0181	643	0.01011	0.00836	0.00761	0.00818
642.9	-0.04605	1.20834	0.55198	1.02522	642.9	0.01014	0.00834	0.00764	0.00819
642.8	0.000102823	1.14293	0.58016	0.85288	642.8	0.01016	0.00837	0.00765	0.0082
642.7	0.15156	1.14078	0.54542	0.91254	642.7	0.01015	0.0084	0.00768	0.00821
642.6	0.23127	1.14525	0.75391	0.86503	642.6	0.01018	0.00842	0.00769	0.00823
642.5	0.51561	1.06812	0.6983	1.06052	642.5	0.01017	0.00845	0.00771	0.00825
642.4	0.41447	0.97377	0.67103	1.17389	642.4	0.01018	0.00845	0.00769	0.00825
642.3	0.48077	0.98996	0.70692	1.09647	642.3	0.01018	0.00846	0.00773	0.00824
642.2	0.52366	0.95502	0.62844	1.22438	642.2	0.01016	0.00849	0.00776	0.00825
642.1	0.45659	0.89343	0.61896	1.26859	642.1	0.01016	0.00848	0.00778	0.00825
642	0.78461	0.68521	0.82862	1.41584	642	0.01017	0.00852	0.0078	0.00824
641.9	0.73336	0.63677	0.82405	1.2512	641.9	0.0102	0.00856	0.00783	0.00822
641.8	0.69525	0.58616	0.92949	1.3594	641.8	0.01028	0.00857	0.00787	0.00824
641.7	0.66898	0.63125	0.77293	1.34506	641.7	0.0103	0.00861	0.0079	0.00824
641.6	0.43088	0.68103	0.6211	1.31169	641.6	0.01036	0.00863	0.00792	0.00825
641.5	0.22713	0.65898	0.73639	1.37299	641.5	0.01038	0.00867	0.00795	0.00822
641.4	0.26958	0.63261	0.89908	1.41416	641.4	0.01035	0.00871	0.00798	0.00824
641.3	0.24749	0.54954	0.82068	1.30289	641.3	0.01039	0.00874	0.00799	0.00824
641.2	0.33142	0.48599	0.77378	1.29593	641.2	0.0104	0.00872	0.00802	0.00831
641.1	0.41317	0.62775	0.78433	1.16226	641.1	0.01041	0.00876	0.00803	0.00833
641	0.44305	0.48128	0.85763	1.22703	641	0.01044	0.00878	0.00806	0.00834
640.9	0.55838	0.49909	0.75741	1.23748	640.9	0.01045	0.00879	0.00807	0.00835
640.8	0.94628	0.50215	0.62911	1.36226	640.8	0.01044	0.00883	0.00809	0.00836
640.7	0.92173	0.55357	0.74644	1.29339	640.7	0.01047	0.00883	0.0081	0.00833
640.6	1.25265	0.59798	0.68246	1.17079	640.6	0.01047	0.00885	0.00813	0.00834
640.5	1.11146	0.42423	0.63119	1.14219	640.5	0.01049	0.00889	0.00812	0.00835
640.4	1.20906	0.12308	0.68961	1.35125	640.4	0.01053	0.00893	0.00816	0.00838
640.3	1.23973	0.34921	0.62228	1.35922	640.3	0.01054	0.00896	0.00814	0.00841
640.2	1.33768	0.25001	0.26407	1.32889	640.2	0.01059	0.00894	0.00816	0.00839
640.1	1.76575	0.42369	0.16507	1.44812	640.1	0.01062	0.00892	0.00817	0.00841
640	1.7899	0.38288	0.14046	1.34185	640	0.01065	0.00889	0.00818	0.00841
639.9	1.92727	0.39822	0.09245	1.21567	639.9	0.01063	0.00894	0.00816	0.00842
639.8	2.07815	0.20589	0.14985	1.2433	639.8	0.01066	0.00896	0.00817	0.00843
639.7	2.2587	0.26886	0.2727	0.95982	639.7	0.01069	0.00898	0.00817	0.00844
639.6	2.35539	0.2579	0.59872	0.82046	639.6	0.01069	0.00903	0.00818	0.00843
639.5	2.23072	0.19928	0.74094	0.84418	639.5	0.01068	0.00907	0.00818	0.00844
639.4	2.01421	0.19116	0.83295	0.94754	639.4	0.01069	0.00911	0.00819	0.00847
639.3	1.9899	0.07405	0.70307	0.89634	639.3	0.01075	0.00912	0.00822	0.00842
639.2	2.08027	-0.07113	0.64294	0.81958	639.2	0.01077	0.00914	0.00825	0.00847
639.1	2.14715	-0.09751	0.78932	0.68669	639.1	0.01077	0.00917	0.00829	0.00852
639	1.90586	-0.09334	0.60202	0.66379	639	0.01076	0.0092	0.00833	0.00854
638.9	1.97061	-0.08497	0.375	0.61394	638.9	0.01081	0.00918	0.00829	0.00857
638.8	2.03886	-0.04988	0.53101	0.63946	638.8	0.01082	0.00924	0.0083	0.00859
638.7	2.15424	0.04933	0.4299	0.47693	638.7	0.01085	0.00925	0.00834	0.00863
638.6	2.08623	-0.10928	0.31474	0.58237	638.6	0.01086	0.00923	0.00833	0.00868
638.5	2.29312	0.02318	0.2739	0.45884	638.5	0.01084	0.00925	0.00829	0.00874
638.4	2.22099	0.16019	0.29942	0.31681	638.4	0.01086	0.00925	0.0083	0.00878
638.3	2.67897	0.29774	0.33234	0.30251	638.3	0.01083	0.00927	0.0083	0.00879
638.2	2.97733	0.4595	0.24458	0.47645	638.2	0.01084	0.00926	0.0083	0.00884
638.1	2.77534	0.31266	0.0998	0.42887	638.1	0.01089	0.00924	0.00828	0.00883
638	2.82268	0.36827	0.06609	0.47114	638	0.01089	0.00924	0.0083	0.00884
637.9	2.84019	0.35045	0.15007	0.43593	637.9	0.0109	0.00925	0.0083	0.00882
637.8	2.70312	0.42482	0.19726	0.52556	637.8	0.01093	0.00925	0.00832	0.00882
637.7	2.62878	0.44155	0.23353	0.72029	637.7	0.01092	0.00924	0.00833	0.00881
637.6	2.5029	0.44929	0.33673	0.68202	637.6	0.01096	0.00925	0.00835	0.00886
637.5	2.22611	0.66702	0.5312	0.55684	637.5	0.01099	0.00926	0.00835	0.00887
637.4	1.97317	0.48773	0.36867	0.58056	637.4	0.01099	0.00922	0.00836	0.00891
637.3	1.7216	0.42261	0.27587	0.59607	637.3	0.01103	0.00923	0.00837	0.00895
637.2	1.58288	0.49409	0.19822	0.48621	637.2	0.01105	0.00924	0.00838	0.00894
637.1	1.31387	0.48436	0.03107	0.3592	637.1	0.01109	0.00926	0.00838	0.00896
637	1.29935	0.24657	0.09049	0.34355	637	0.01109	0.00926	0.00841	0.00899
636.9	1.28491	0.25861	0.21889	0.29239	636.9	0.01108	0.00927	0.00842	0.009
636.8	1.04035	0.04483	0.18291	0.11794	636.8	0.0111	0.00925	0.00842	0.009
636.7	1.12695	0.21809	0.13533	0.13978	636.7	0.01113	0.00929	0.00842	0.00901
636.6	1.05023	0.32449	0.12839	0.14204	636.6	0.01119	0.0093	0.00846	0.00905
636.5	1.15975	0.61846	0.05556	0.19373	636.5	0.01121	0.00929	0.00847	0.00904
636.4	1.11079	0.49644	-0.01006	0.23215	636.4	0.01119	0.00929	0.00852	0.00906
636.3	1.07255	0.52334	-0.26184	0.25289	636.3	0.01123	0.00927	0.00855	0.00911
636.2	1.12263	0.61141	-0.43237	0.1735	636.2	0.01127	0.0093	0.00856	0.00912
636.1	1.09819	0.61374	-0.52103	0.11784	636.1	0.0113	0.00932	0.00858	0.00912
636	1.09139	0.39892	-0.36478	-0.10529	636	0.01128	0.00934	0.00859	0.00921
635.9	0.89754	0.55983	-0.3595	-0.2386	635.9	0.01129	0.00936	0.00863	0.00922
635.8	0.80534	0.58778	-0.27126	-0.09935	635.8	0.01134	0.00937	0.00863	0.00918
635.7	0.86972	0.88157	-0.14589	-0.04645	635.7	0.01136	0.00936	0.00864	0.00915
635.6	0.8246	0.93685	0.11025	-0.05832	635.6	0.01139	0.00937	0.0087	0.00917
635.5	0.83838	0.83951	0.00805	-0.10439	635.5	0.01141	0.00937	0.00869	0.00916
635.4	0.71512	0.94359	0.15933	-0.14478	635.4	0.01139	0.00938	0.00867	0.00917
635.3	0.68533	1.16513	0.1228	-0.14419	635.3	0.0114	0.00938	0.00868	0.00921
635.2	0.62	1.18065	0.0771	-0.20482	635.2	0.01145	0.00939	0.00869	0.00921
635.1	0.78996	1.07998	0.01128	-0.20138	635.1	0.01147	0.00944	0.00868	0.00919
635	0.61289	0.93197	-0.05678	-0.28273	635	0.01149	0.00946	0.0087	0.0092
634.9	0.26556	0.80744	-0.07769	-0.42627	634.9	0.01151	0.00951	0.00873	0.00921
634.8	0.5784	0.72592	0.02134	-0.56799	634.8	0.01152	0.00954	0.00877	0.00921
634.7	0.52796	0.61704	-0.12706	-0.59978	634.7	0.01152	0.00959	0.00876	0.00923
634.6	0.40544	0.43152	-0.2269	-0.56791	634.6	0.01156	0.00965	0.00878	0.00928
634.5	0.37373	0.45805	-0.276	-0.52068	634.5	0.01157	0.00963	0.00882	0.00927
634.4	0.26773	0.47243	-0.26802	-0.49055	634.4	0.01161	0.0097	0.00884	0.0093
634.3	0.13492	0.34082	-0.07549	-0.51288	634.3	0.0116	0.00972	0.00885	0.00931
634.2	0.02782	0.12107	-0.35637	-0.54386	634.2	0.01162	0.00976	0.00886	0.0093
634.1	0.19884	0.31094	-0.35482	-0.46781	634.1	0.01165	0.0098	0.00887	0.00931
634	0.24671	0.32245	-0.32933	-0.52259	634	0.01163	0.00986	0.00888	0.00931
633.9	0.26719	0.19325	-0.22818	-0.46066	633.9	0.01164	0.00988	0.0089	0.00934
633.8	0.27916	0.09956	-0.04153	-0.52226	633.8	0.01165	0.0099	0.00893	0.00933
633.7	0.1519	0.26025	-0.19406	-0.45056	633.7	0.01165	0.00992	0.00898	0.00934
633.6	0.27236	0.42176	-0.26587	-0.51332	633.6	0.01166	0.00991	0.00899	0.00936
633.5	0.39709	0.4475	-0.23828	-0.1548	633.5	0.01166	0.00995	0.00901	0.00939
633.4	0.54315	0.47863	-0.25646	-0.32044	633.4	0.01167	0.00995	0.00904	0.0094
633.3	0.56378	0.62562	-0.11107	-0.39439	633.3	0.01168	0.00995	0.00904	0.00941
633.2	0.52521	0.54338	-0.14041	-0.348	633.2	0.01169	0.01	0.00906	0.00942
633.1	0.61904	0.65923	-0.05282	-0.18623	633.1	0.01172	0.01003	0.00906	0.00942
633	0.39843	0.78438	0.03557	-0.12775	633	0.01173	0.01005	0.00908	0.00946
632.9	0.48321	0.71961	0.11522	0.07382	632.9	0.01175	0.01003	0.00908	0.00948
632.8	0.25953	0.92145	0.16183	-0.00647	632.8	0.01177	0.01003	0.00909	0.0095
632.7	0.40481	1.02623	-0.12733	0.02161	632.7	0.0118	0.01007	0.00911	0.0095
632.6	0.34202	1.22302	-0.10488	0.08529	632.6	0.01183	0.01008	0.00909	0.00954
632.5	0.53112	1.2088	-0.26181	0.11619	632.5	0.01186	0.01009	0.00909	0.00959
632.4	0.52763	1.09328	-0.27519	0.03161	632.4	0.01188	0.01007	0.00911	0.00962
632.3	0.16109	1.04977	-0.31628	-0.01308	632.3	0.01193	0.01014	0.00912	0.00966
632.2	0.17707	1.00542	-0.34484	-0.08688	632.2	0.01197	0.01015	0.00913	0.00967
632.1	0.17724	0.91551	-0.32478	-0.08149	632.1	0.01202	0.01017	0.00917	0.00968
632	0.40425	1.00102	-0.40006	-0.1645	632	0.01206	0.01022	0.0092	0.00967
631.9	0.37097	0.66337	-0.32825	0.0376	631.9	0.01205	0.01024	0.00927	0.00973
631.8	0.34351	0.71259	-0.36989	0.13838	631.8	0.01208	0.01025	0.00928	0.00975
631.7	0.13489	0.51911	-0.33752	0.32739	631.7	0.01213	0.01029	0.00929	0.00978
631.6	-0.12983	0.35903	-0.1413	0.4721	631.6	0.01214	0.0103	0.0093	0.00981
631.5	0.10534	0.46646	-0.06475	0.54587	631.5	0.01214	0.01033	0.00929	0.00983
631.4	0.19355	0.46453	-0.03055	0.56689	631.4	0.01217	0.01033	0.00933	0.00985
631.3	0.2647	0.46112	-0.0018	0.46838	631.3	0.01222	0.01031	0.00934	0.00987
631.2	0.40112	0.44668	0.01638	0.53114	631.2	0.01225	0.01032	0.00933	0.0099
631.1	0.32625	0.43951	-0.31086	0.44942	631.1	0.01226	0.01033	0.00933	0.00991
631	0.4679	0.53145	-0.26497	0.21791	631	0.01228	0.01032	0.00933	0.00991
630.9	0.41572	0.63492	-0.1308	0.31944	630.9	0.01231	0.01033	0.00935	0.00991
630.8	0.42226	0.67512	-0.17307	0.39109	630.8	0.01233	0.01035	0.0094	0.00993
630.7	0.40136	0.47356	-0.06861	0.39196	630.7	0.01235	0.01037	0.00945	0.00992
630.6	0.42717	0.58133	-0.1875	0.30837	630.6	0.01238	0.01038	0.00946	0.00992
630.5	0.48653	0.71645	-0.09405	0.41953	630.5	0.01241	0.01037	0.00948	0.00992
630.4	0.69021	0.80625	0.0748	0.52937	630.4	0.01243	0.01038	0.00946	0.00994
630.3	0.71157	0.56249	0.19539	0.69528	630.3	0.01246	0.01045	0.00947	0.00996
630.2	0.74846	0.47238	0.25241	0.64521	630.2	0.01251	0.01047	0.00949	0.00997
630.1	0.67662	0.27856	0.37145	0.64562	630.1	0.01252	0.0105	0.00949	0.00998
630	0.46851	0.07089	0.19091	0.84066	630	0.01257	0.01051	0.0095	0.01001
629.9	0.6281	-0.07916	0.14932	0.88603	629.9	0.01258	0.01052	0.00957	0.01006
629.8	0.64431	-0.1511	0.30841	0.97976	629.8	0.0126	0.01055	0.00958	0.01007
629.7	0.57472	-0.28974	0.21637	1.04571	629.7	0.01262	0.01063	0.00959	0.01007
629.6	0.98806	-0.52777	0.07414	0.85282	629.6	0.01266	0.01063	0.00962	0.01006
629.5	1.15502	-0.5638	0.04296	0.88486	629.5	0.01268	0.01064	0.00966	0.01008
629.4	1.19244	-0.4641	0.30508	0.89767	629.4	0.01268	0.01065	0.00968	0.01008
629.3	1.11302	-0.52005	0.57536	0.73781	629.3	0.01273	0.01068	0.00969	0.01009
629.2	1.01807	-0.3742	0.74408	0.78699	629.2	0.01273	0.01067	0.00969	0.01009
629.1	0.97656	-0.48404	0.70231	0.84484	629.1	0.01277	0.01072	0.00971	0.01012
629	1.28923	-0.4999	0.7391	0.7739	629	0.01276	0.01073	0.00971	0.01012
628.9	1.51984	-0.73696	0.71576	1.00311	628.9	0.01276	0.01075	0.00972	0.01016
628.8	1.59201	-0.60757	0.84012	0.98972	628.8	0.01279	0.01076	0.00973	0.01016
628.7	1.58064	-0.59063	0.64323	1.02896	628.7	0.01283	0.01074	0.00975	0.01018
628.6	1.55306	-0.46684	0.65037	1.12042	628.6	0.01285	0.01078	0.00972	0.01015
628.5	1.55626	-0.76211	0.64411	1.03835	628.5	0.01286	0.01078	0.00975	0.01017
628.4	1.48444	-0.68083	0.87349	0.81196	628.4	0.01281	0.01079	0.00974	0.01019
628.3	1.79556	-0.54629	0.67276	0.77729	628.3	0.01283	0.01083	0.00976	0.01018
628.2	1.68784	-0.43438	0.57891	0.89345	628.2	0.01286	0.01083	0.0098	0.01021
628.1	1.48512	-0.38898	0.65613	0.80475	628.1	0.01289	0.01083	0.00981	0.01021
628	1.2485	-0.20803	1.01752	0.94552	628	0.01291	0.01083	0.00983	0.01023
627.9	1.34179	-0.03557	1.02665	1.06705	627.9	0.01293	0.01087	0.00986	0.01028
627.8	1.22843	0.08809	1.35347	0.77882	627.8	0.01295	0.01092	0.00991	0.01027
627.7	1.33314	0.06581	1.40067	0.73464	627.7	0.01296	0.01092	0.00994	0.0103
627.6	1.44336	0.10617	1.31656	0.72958	627.6	0.01298	0.01094	0.00995	0.01035
627.5	1.6719	-0.12081	1.25041	0.52656	627.5	0.01301	0.01094	0.00994	0.01034
627.4	1.6399	0.10429	1.39582	0.6943	627.4	0.01303	0.01095	0.00995	0.01039
627.3	1.68769	0.02315	1.41489	0.68353	627.3	0.01303	0.01095	0.00994	0.01041
627.2	1.56369	0.07035	1.60996	0.72245	627.2	0.01303	0.01099	0.00998	0.01045
627.1	1.51069	0.24663	1.45897	0.47162	627.1	0.01304	0.01103	0.01003	0.01046
627	1.45964	0.35987	1.46365	0.55153	627	0.01305	0.01104	0.01004	0.01048
626.9	1.23891	0.69332	1.27077	0.4265	626.9	0.01306	0.01104	0.01005	0.01049
626.8	1.17325	0.8942	1.3859	0.70971	626.8	0.01307	0.01103	0.01006	0.01052
626.7	1.39066	1.12359	1.36803	0.73897	626.7	0.0131	0.01105	0.0101	0.01055
626.6	1.25691	1.03563	1.59364	0.68898	626.6	0.01313	0.01107	0.01011	0.01057
626.5	1.29187	1.23937	1.43129	0.4946	626.5	0.01316	0.01108	0.01009	0.01061
626.4	1.24249	1.27071	1.53968	0.38644	626.4	0.01323	0.01106	0.01009	0.01065
626.3	0.9872	1.20519	1.68873	0.53262	626.3	0.0132	0.0111	0.01009	0.01071
626.2	0.81059	1.17191	1.6082	0.58113	626.2	0.01322	0.01112	0.01009	0.01073
626.1	0.68042	1.21133	1.53265	0.65615	626.1	0.01321	0.01112	0.01011	0.01077
626	0.70618	1.2454	1.2259	0.70378	626	0.01319	0.01114	0.01012	0.01079
625.9	0.56773	1.09869	1.30538	0.70418	625.9	0.01321	0.01117	0.01012	0.0108
625.8	0.62624	1.17452	1.15604	0.68077	625.8	0.01324	0.01118	0.01014	0.01083
625.7	0.52925	1.29283	0.95371	0.73719	625.7	0.01326	0.01118	0.01014	0.01085
625.6	0.27682	1.40711	1.09757	0.63397	625.6	0.01328	0.01115	0.01014	0.01087
625.5	-0.01177	1.41523	1.10384	0.79587	625.5	0.01328	0.01115	0.01014	0.01091
625.4	-0.00924	1.43997	1.01407	0.81813	625.4	0.01325	0.01119	0.01016	0.01093
625.3	0.0067	1.44143	1.02964	0.86949	625.3	0.01326	0.01119	0.0102	0.01096
625.2	-0.02348	1.65901	1.07187	0.76964	625.2	0.01329	0.01118	0.0102	0.011
625.1	0.13294	1.69678	0.79299	0.8548	625.1	0.01336	0.0112	0.01023	0.01099
625	0.08191	1.65337	0.8589	0.67492	625	0.01336	0.01121	0.01029	0.01101
624.9	0.11796	1.63291	0.94358	0.80104	624.9	0.01339	0.01122	0.0103	0.01102
624.8	0.36319	1.77431	0.89028	0.91215	624.8	0.01343	0.01126	0.01033	0.01106
624.7	0.5082	1.61745	0.56171	0.59986	624.7	0.01345	0.01128	0.01037	0.01104
624.6	0.61777	1.66717	0.43851	0.4813	624.6	0.01348	0.01128	0.01036	0.01105
624.5	0.56603	1.71193	0.19946	0.7152	624.5	0.01349	0.01129	0.01034	0.0111
624.4	0.64275	1.51134	0.508	0.67414	624.4	0.01349	0.01132	0.01036	0.01111
624.3	0.61766	1.57695	0.55926	0.6667	624.3	0.0135	0.01133	0.0104	0.01117
624.2	0.48508	1.33977	0.5708	0.57195	624.2	0.01352	0.01134	0.01044	0.01122
624.1	0.46125	1.32981	0.36429	0.59826	624.1	0.01357	0.01136	0.01045	0.01125
624	0.26593	1.2495	0.30197	0.62003	624	0.01362	0.01138	0.01048	0.01128
623.9	0.40926	1.07324	0.15463	0.86347	623.9	0.01367	0.01141	0.01049	0.01131
623.8	0.83673	1.05124	0.30072	0.93613	623.8	0.0137	0.01139	0.01047	0.01129
623.7	0.81613	1.1885	0.41237	0.9711	623.7	0.01372	0.01142	0.01051	0.01134
623.6	0.69624	1.005	0.50071	0.74614	623.6	0.01374	0.01144	0.01051	0.01133
623.5	0.67293	0.7707	0.51992	0.48163	623.5	0.01375	0.0115	0.01056	0.01135
623.4	0.48535	0.93864	0.38262	0.45201	623.4	0.01378	0.0115	0.01057	0.01137
623.3	0.5129	0.94932	0.16065	0.41726	623.3	0.0138	0.01156	0.01061	0.01138
623.2	0.5834	0.99174	0.16888	0.53278	623.2	0.0138	0.01157	0.01064	0.0114
623.1	0.60328	1.26655	0.25343	0.56934	623.1	0.01382	0.0116	0.01066	0.01138
623	0.82232	1.25571	0.11618	0.62173	623	0.01387	0.01159	0.01069	0.01137
622.9	1.29054	1.33471	0.19939	0.42186	622.9	0.01387	0.01161	0.01074	0.01139
622.8	1.41227	1.28087	0.10768	0.6139	622.8	0.01394	0.01164	0.01077	0.01143
622.7	1.45332	1.2594	0.0515	0.66649	622.7	0.01398	0.01166	0.0108	0.01145
622.6	1.40925	1.27022	0.19546	0.51654	622.6	0.01399	0.01167	0.01087	0.01149
622.5	1.35198	1.30764	0.20526	0.52173	622.5	0.01401	0.01171	0.01087	0.01149
622.4	1.37489	1.16225	0.33395	0.58747	622.4	0.01401	0.01177	0.01094	0.01152
622.3	1.63671	1.27375	0.12209	0.65683	622.3	0.01402	0.01182	0.01098	0.01155
622.2	1.62014	1.43298	0.14592	0.61713	622.2	0.01406	0.01184	0.01098	0.0116
622.1	1.52183	1.45727	0.16547	0.46233	622.1	0.01411	0.01187	0.01097	0.0116
622	1.63125	1.39594	0.23247	0.51236	622	0.01414	0.01195	0.011	0.0116
621.9	1.8757	1.52845	0.17158	0.54842	621.9	0.01416	0.01196	0.01105	0.01162
621.8	1.94738	1.26568	0.09139	0.54947	621.8	0.0142	0.01199	0.01104	0.01166
621.7	1.86809	1.32332	0.13699	0.46598	621.7	0.01426	0.01201	0.01104	0.0117
621.6	1.79241	1.07059	-0.07112	0.42313	621.6	0.01429	0.01204	0.01103	0.01172
621.5	1.58144	1.01942	-0.03841	0.69777	621.5	0.01429	0.01208	0.01103	0.01174
621.4	1.64343	0.89282	0.1397	0.70754	621.4	0.01434	0.01209	0.01104	0.01179
621.3	1.72315	0.7835	0.07436	0.76171	621.3	0.01439	0.01207	0.01108	0.01182
621.2	1.76004	0.92257	-0.08786	1.02658	621.2	0.01441	0.0121	0.01112	0.01183
621.1	2.08859	0.91989	0.00787	1.02068	621.1	0.01445	0.01212	0.01114	0.01182
621	2.21168	0.87386	0.17257	0.94884	621	0.01448	0.01216	0.01116	0.01183
620.9	2.2795	1.01196	0.25276	0.75193	620.9	0.0145	0.01222	0.0112	0.01185
620.8	2.28699	1.05739	0.2694	0.88684	620.8	0.01452	0.01224	0.01124	0.01186
620.7	2.38602	1.00161	0.26501	0.95599	620.7	0.01454	0.01227	0.01127	0.01188
620.6	1.94321	0.99007	0.20883	1.18776	620.6	0.01455	0.01229	0.01132	0.01195
620.5	2.00991	0.72408	0.16563	0.99126	620.5	0.01458	0.01231	0.01133	0.01196
620.4	1.81739	0.68482	-0.02382	1.02898	620.4	0.01464	0.01235	0.01136	0.01197
620.3	1.93462	0.78908	-0.05551	0.96327	620.3	0.01466	0.01234	0.01138	0.01198
620.2	2.02847	0.80862	0.03112	1.27599	620.2	0.01471	0.01239	0.01142	0.01199
620.1	1.79971	0.70659	0.16031	1.25391	620.1	0.01471	0.01238	0.01145	0.012
620	2.04426	0.6452	0.30183	1.28356	620	0.01476	0.01242	0.01149	0.01203
619.9	1.86278	0.54016	0.1628	1.16101	619.9	0.01479	0.01247	0.01148	0.01206
619.8	1.75431	0.57285	0.24044	1.172	619.8	0.01481	0.01245	0.01149	0.01209
619.7	1.50227	0.67435	0.29899	1.26397	619.7	0.0148	0.01249	0.01151	0.01211
619.6	1.4606	0.8016	0.40452	1.23665	619.6	0.01487	0.01249	0.01151	0.0121
619.5	1.50781	0.80111	0.37124	1.12108	619.5	0.01491	0.01252	0.01154	0.0121
619.4	1.53942	0.77178	0.70222	1.17643	619.4	0.01494	0.01257	0.01155	0.01211
619.3	1.55037	0.72614	0.58798	1.23808	619.3	0.01501	0.01261	0.01154	0.01211
619.2	1.5219	0.75425	0.4003	1.19911	619.2	0.01505	0.0126	0.01154	0.01213
619.1	1.46274	0.99829	0.4472	1.39262	619.1	0.0151	0.01262	0.01159	0.01214
619	1.48458	0.99415	0.58936	1.25717	619	0.01515	0.01262	0.01164	0.01214
618.9	1.54718	1.14252	0.70822	1.41179	618.9	0.01518	0.01264	0.01167	0.01217
618.8	1.59677	0.99374	0.67334	1.32005	618.8	0.0152	0.01268	0.01175	0.01219
618.7	1.37466	0.94969	0.6209	1.3358	618.7	0.01523	0.01268	0.01175	0.01221
618.6	1.44637	0.97085	0.73416	1.46355	618.6	0.01526	0.01272	0.01175	0.01223
618.5	1.2406	0.8977	0.81427	1.51485	618.5	0.01528	0.01272	0.01178	0.01223
618.4	1.05745	0.97883	1.03745	1.58235	618.4	0.01531	0.01275	0.01185	0.01224
618.3	1.07023	0.92204	0.88271	1.60501	618.3	0.01531	0.01275	0.01191	0.01226
618.2	0.91803	1.1367	0.92832	1.76348	618.2	0.01536	0.0128	0.01193	0.0123
618.1	0.843	1.30029	0.95375	1.52075	618.1	0.01539	0.01282	0.01194	0.01231
618	0.90256	1.32292	0.69366	1.269	618	0.01544	0.01283	0.01194	0.01232
617.9	0.61613	1.52031	0.39329	1.33633	617.9	0.01544	0.01289	0.01198	0.01236
617.8	0.51034	1.5348	0.10913	1.26055	617.8	0.01545	0.01288	0.01197	0.01239
617.7	0.69914	1.42178	0.18331	1.21035	617.7	0.01546	0.01288	0.01196	0.01241
617.6	0.66986	1.66435	0.25133	0.97268	617.6	0.01551	0.01296	0.01197	0.01245
617.5	0.56901	1.74614	0.14484	0.75929	617.5	0.01553	0.01297	0.01197	0.01249
617.4	0.64102	1.76458	-0.02805	0.76805	617.4	0.01554	0.01301	0.01199	0.01249
617.3	0.43524	2.0317	0.0281	0.88371	617.3	0.01558	0.01303	0.012	0.01252
617.2	0.33167	1.94767	0.07286	0.98122	617.2	0.01565	0.01308	0.01204	0.01257
617.1	0.58679	1.90465	-0.08187	0.62225	617.1	0.01568	0.01308	0.01205	0.0126
617	0.44145	2.15745	-0.14904	0.72107	617	0.01571	0.01315	0.01207	0.01266
616.9	0.39497	2.24226	-0.37316	0.93274	616.9	0.01573	0.01316	0.01208	0.01269
616.8	0.0903	2.21857	-0.33604	0.80888	616.8	0.01577	0.01317	0.01209	0.01271
616.7	0.18819	2.17702	-0.11936	0.84415	616.7	0.01579	0.0132	0.01213	0.01273
616.6	0.07653	2.01958	-0.06017	0.65096	616.6	0.01584	0.01324	0.01216	0.01275
616.5	-0.02884	1.91875	-0.10645	0.49993	616.5	0.0159	0.01329	0.01217	0.01278
616.4	-0.32076	1.95384	-0.25957	0.48455	616.4	0.01592	0.0133	0.01219	0.01282
616.3	-0.35857	2.12411	-0.17426	0.48245	616.3	0.01591	0.0133	0.01218	0.01283
616.2	-0.40031	1.95155	-0.32309	0.32316	616.2	0.01593	0.01332	0.01224	0.01283
616.1	-0.24443	1.90072	-0.05673	0.13017	616.1	0.01595	0.0133	0.01228	0.01288
616	-0.3346	1.9511	-0.17671	0.08066	616	0.01598	0.01333	0.01231	0.01289
615.9	-0.69013	1.59939	-0.26264	0.38631	615.9	0.01602	0.01335	0.01231	0.01293
615.8	-0.57447	1.56115	-0.2048	0.30162	615.8	0.01604	0.01339	0.01233	0.01297
615.7	-0.39432	1.61145	-0.36832	0.33017	615.7	0.01606	0.01344	0.01235	0.01297
615.6	-0.23134	1.52752	-0.47556	0.31675	615.6	0.0161	0.01343	0.01234	0.013
615.5	-0.23601	1.72116	-0.44118	0.40379	615.5	0.01613	0.01347	0.01238	0.01302
615.4	-0.21365	1.58998	-0.31468	0.31127	615.4	0.01615	0.01344	0.01241	0.01307
615.3	-0.19873	1.75425	-0.41051	0.39827	615.3	0.01617	0.01347	0.01244	0.01313
615.2	0.10755	1.73317	-0.34547	0.44133	615.2	0.01619	0.01349	0.01245	0.01314
615.1	0.352	1.9074	-0.42799	0.2686	615.1	0.01625	0.01353	0.01245	0.01317
615	0.37983	1.84106	-0.5574	0.32802	615	0.01629	0.01355	0.01249	0.01318
614.9	0.6233	1.40366	-0.4732	0.18141	614.9	0.0163	0.01356	0.01249	0.01321
614.8	0.1398	1.28047	-0.43976	0.33908	614.8	0.01633	0.01361	0.0125	0.01324
614.7	0.05095	1.01344	-0.49798	0.65871	614.7	0.01637	0.01365	0.0125	0.01327
614.6	0.19337	1.10639	-0.20967	0.75808	614.6	0.01642	0.01368	0.0125	0.01328
614.5	0.09734	1.05002	-0.204	0.85914	614.5	0.01645	0.01372	0.01254	0.01329
614.4	0.39546	1.15079	-0.16695	0.93861	614.4	0.01649	0.01372	0.01257	0.01331
614.3	0.24396	0.97952	-0.06204	0.95166	614.3	0.01651	0.01371	0.01262	0.01331
614.2	0.33671	0.93646	-0.06502	1.09235	614.2	0.01654	0.01374	0.01265	0.01335
614.1	0.25024	0.92006	0.19526	1.10272	614.1	0.01659	0.01377	0.01267	0.01338
614	0.61246	0.88625	0.32219	0.9723	614	0.01661	0.01381	0.0127	0.01339
613.9	0.59074	0.88324	0.1586	0.93242	613.9	0.01659	0.01383	0.01273	0.01341
613.8	0.50278	0.85752	0.41736	1.12879	613.8	0.01662	0.01389	0.01275	0.01341
613.7	0.64452	0.65264	0.37126	0.95882	613.7	0.01662	0.01387	0.01277	0.01342
613.6	0.54001	0.31518	0.35064	1.13867	613.6	0.01667	0.0139	0.0128	0.01343
613.5	0.60948	0.33681	0.59863	1.12908	613.5	0.01669	0.01393	0.0128	0.01344
613.4	0.58113	0.42501	0.50291	1.06048	613.4	0.01673	0.01397	0.01282	0.01347
613.3	0.45466	0.33902	0.46445	1.48497	613.3	0.01673	0.01399	0.01284	0.01346
613.2	0.90584	0.42794	0.29616	1.68669	613.2	0.01675	0.01402	0.01289	0.01347
613.1	0.75431	0.17439	0.36289	1.74209	613.1	0.01683	0.01405	0.01291	0.0135
613	0.90399	0.44522	0.44443	2.00374	613	0.01688	0.01408	0.01296	0.01356
612.9	0.77233	0.45647	0.38363	2.06071	612.9	0.01695	0.0141	0.01301	0.01361
612.8	0.923	0.48788	0.50118	2.0279	612.8	0.01697	0.0141	0.01303	0.01362
612.7	0.96252	0.4481	0.41111	2.10128	612.7	0.017	0.01413	0.01305	0.01364
612.6	1.02912	0.52937	0.88409	1.97626	612.6	0.01701	0.01418	0.01308	0.01368
612.5	1.34351	0.61071	0.91707	1.78971	612.5	0.01707	0.01422	0.0131	0.0137
612.4	1.00027	0.53265	0.78802	2.02844	612.4	0.01709	0.01421	0.01312	0.01369
612.3	0.85743	0.37505	1.20806	2.19404	612.3	0.01712	0.01421	0.01315	0.0137
612.2	0.52926	0.16389	1.41085	1.9992	612.2	0.01716	0.01424	0.01318	0.01374
612.1	0.48206	0.42893	1.38012	2.03226	612.1	0.01718	0.01428	0.0132	0.01373
612	0.42122	0.2464	1.32109	2.26182	612	0.01724	0.01431	0.0132	0.01377
611.9	0.63963	0.36294	1.3363	2.07169	611.9	0.01724	0.01435	0.01322	0.0138
611.8	0.53779	0.37103	1.44029	1.97957	611.8	0.01726	0.0144	0.01323	0.01382
611.7	0.52575	0.37301	1.50981	2.04401	611.7	0.01727	0.01442	0.01325	0.01386
611.6	0.38785	0.41484	1.39533	2.16393	611.6	0.0173	0.01448	0.01326	0.01389
611.5	0.24179	0.66031	1.58119	2.06846	611.5	0.01735	0.01455	0.01329	0.01392
611.4	0.1552	0.80264	1.59112	2.1467	611.4	0.01738	0.01458	0.01333	0.01396
611.3	0.21103	0.90365	1.5407	1.72553	611.3	0.01739	0.01462	0.01337	0.01395
611.2	0.35888	0.8293	1.13097	1.68974	611.2	0.01743	0.01462	0.01343	0.01396
611.1	0.52933	0.87835	1.12905	1.82561	611.1	0.01744	0.01467	0.01346	0.01401
611	0.21794	0.8337	1.32224	1.73828	611	0.01744	0.01471	0.01347	0.01402
610.9	0.30262	0.84047	1.18101	1.87221	610.9	0.0175	0.01477	0.01347	0.01404
610.8	0.65323	0.62307	0.9578	1.86413	610.8	0.01755	0.0148	0.01349	0.01403
610.7	0.5365	0.25122	1.09105	1.60954	610.7	0.01759	0.01483	0.01351	0.01405
610.6	0.46338	0.26989	1.19889	1.76387	610.6	0.01764	0.01484	0.01355	0.0141
610.5	0.55504	0.13738	1.05269	1.89779	610.5	0.01769	0.01486	0.01357	0.01417
610.4	0.28605	-0.03626	1.33147	1.86068	610.4	0.01769	0.01485	0.0136	0.01424
610.3	0.35753	-0.15327	1.28109	1.6928	610.3	0.01773	0.01487	0.01361	0.01425
610.2	0.31948	-0.15654	1.25834	1.2825	610.2	0.01779	0.01489	0.01364	0.01431
610.1	0.37635	-0.0611	1.04835	1.51526	610.1	0.01778	0.01492	0.01369	0.01437
610	0.35578	-0.31469	0.88105	1.46	610	0.01782	0.01494	0.01373	0.0144
609.9	0.3359	-0.28197	1.01499	1.16909	609.9	0.01791	0.01496	0.01377	0.01445
609.8	0.0508	-0.25504	1.0602	1.13878	609.8	0.01794	0.01501	0.01377	0.01449
609.7	0.32255	-0.13933	0.76632	1.1586	609.7	0.01793	0.01505	0.0138	0.01449
609.6	0.38076	-0.44886	0.56367	0.83227	609.6	0.01796	0.01509	0.01382	0.01452
609.5	0.31772	-0.30313	0.74797	0.77545	609.5	0.01798	0.01514	0.01382	0.01453
609.4	0.4348	-0.67258	0.58257	1.02454	609.4	0.01801	0.01518	0.01385	0.01455
609.3	0.53214	-0.73631	0.53989	1.06932	609.3	0.01805	0.01521	0.01389	0.01459
609.2	0.53754	-0.61895	0.28021	0.87217	609.2	0.01811	0.01525	0.01393	0.01462
609.1	0.47762	-0.53883	0.1955	1.09579	609.1	0.01811	0.01528	0.01395	0.0147
609	0.69298	-0.69381	0.23652	0.93484	609	0.01817	0.0153	0.01396	0.01476
608.9	0.85698	-0.61867	-0.13159	0.81466	608.9	0.01819	0.01536	0.01398	0.01482
608.8	0.94767	-0.4159	-0.04963	0.93559	608.8	0.01822	0.01544	0.01401	0.01487
608.7	0.98815	-0.66364	-0.07956	0.95439	608.7	0.01825	0.01546	0.01407	0.0149
608.6	0.82198	-0.56308	-0.01215	0.87294	608.6	0.0183	0.0155	0.01407	0.01494
608.5	0.48243	-0.38355	-0.13886	0.84256	608.5	0.01838	0.01556	0.0141	0.01495
608.4	0.33299	-0.27787	-0.07537	0.92363	608.4	0.0184	0.01562	0.01418	0.01498
608.3	0.42708	-0.17969	-0.13538	0.9377	608.3	0.01844	0.01564	0.0142	0.01501
608.2	0.43437	-0.15121	-0.16395	0.95158	608.2	0.01844	0.01562	0.01424	0.01501
608.1	0.61241	-0.22689	-0.50195	1.0819	608.1	0.01849	0.01559	0.01425	0.01507
608	0.36482	-0.43893	-0.57315	1.19512	608	0.01851	0.01561	0.01431	0.01513
607.9	0.35935	-0.37814	-0.3501	1.49397	607.9	0.01852	0.01561	0.01435	0.01522
607.8	0.36036	-0.48214	-0.37396	1.29609	607.8	0.01857	0.01564	0.01436	0.01525
607.7	0.08115	-0.35919	-0.51302	1.50198	607.7	0.0186	0.01571	0.01442	0.01532
607.6	0.29754	-0.29689	-0.72734	1.20265	607.6	0.01866	0.01573	0.01446	0.01534
607.5	0.08331	-0.10446	-0.64995	1.04992	607.5	0.01868	0.01572	0.01449	0.01536
607.4	0.31334	-0.00704	-0.61497	1.1469	607.4	0.0187	0.01572	0.01452	0.01537
607.3	0.47086	0.27018	-0.74923	1.46652	607.3	0.01872	0.01575	0.01454	0.01537
607.2	0.57899	0.51735	-0.65527	1.44029	607.2	0.01875	0.01579	0.01455	0.01539
607.1	0.79593	0.54193	-0.72516	1.34885	607.1	0.01878	0.01583	0.01457	0.01539
607	0.99329	0.67851	-0.94783	1.30587	607	0.01883	0.01588	0.0146	0.01543
606.9	1.1195	0.70965	-1.02178	1.37543	606.9	0.01882	0.01591	0.01465	0.01544
606.8	1.13132	0.49951	-0.76212	1.24888	606.8	0.01889	0.01593	0.01467	0.01545
606.7	1.2395	0.48336	-0.88201	1.25082	606.7	0.01892	0.01596	0.01469	0.01549
606.6	1.38045	0.74876	-1.05356	1.14008	606.6	0.01893	0.01598	0.01473	0.01551
606.5	1.51005	0.44837	-1.16531	1.21602	606.5	0.01899	0.01601	0.01477	0.01556
606.4	1.61447	0.59663	-1.00053	1.13856	606.4	0.019	0.01601	0.01483	0.0156
606.3	1.33281	0.34928	-0.87236	1.26013	606.3	0.01904	0.01602	0.01483	0.01563
606.2	1.2493	0.1374	-1.06112	1.09461	606.2	0.01905	0.01603	0.01489	0.01566
606.1	1.1726	0.35987	-1.07875	0.8682	606.1	0.01904	0.01604	0.01492	0.0157
606	1.23513	0.4686	-1.06019	0.8182	606	0.01906	0.01606	0.01492	0.01567
605.9	0.99876	0.29683	-0.79197	0.9767	605.9	0.01906	0.01609	0.01496	0.01564
605.8	0.89226	0.22047	-0.67263	0.71711	605.8	0.0191	0.01612	0.01498	0.01565
605.7	0.66186	0.2514	-0.67037	0.60468	605.7	0.01913	0.01614	0.01504	0.01565
605.6	0.37585	0.30741	-0.57057	0.51946	605.6	0.01917	0.01614	0.01505	0.01568
605.5	0.61184	0.08667	-0.64486	0.54439	605.5	0.0192	0.01616	0.01508	0.01572
605.4	0.67534	0.24989	-0.56242	0.40167	605.4	0.01926	0.01615	0.01513	0.01575
605.3	0.5505	-0.22753	-0.57856	0.20663	605.3	0.01924	0.01617	0.01517	0.01578
605.2	0.96049	-0.42184	-0.73466	0.20867	605.2	0.01932	0.01615	0.01514	0.01581
605.1	1.2476	-0.59667	-0.66067	0.06211	605.1	0.01935	0.01619	0.01516	0.01585
605	1.36281	-0.50508	-0.47273	-0.10258	605	0.01939	0.01623	0.01519	0.0159
604.9	1.48166	-0.27068	-0.18471	-0.4366	604.9	0.01946	0.01632	0.01521	0.01593
604.8	1.60256	-0.20111	0.2267	-0.53947	604.8	0.01951	0.01637	0.01523	0.01595
604.7	1.45413	-0.27833	0.18704	-0.55114	604.7	0.01954	0.0164	0.01526	0.01598
604.6	1.50327	-0.1335	0.09978	-0.6704	604.6	0.01957	0.01641	0.01529	0.01602
604.5	1.73843	-0.09447	0.25071	-0.72848	604.5	0.01963	0.01644	0.01532	0.01604
604.4	1.74055	-0.38678	0.33821	-0.68946	604.4	0.01966	0.01646	0.01531	0.01607
604.3	1.5513	-0.35476	0.67155	-0.59415	604.3	0.01968	0.01646	0.01532	0.01612
604.2	1.59788	-0.44653	0.58727	-0.66069	604.2	0.01975	0.01652	0.01535	0.0162
604.1	1.2941	-0.50924	0.40012	-0.82747	604.1	0.01983	0.01653	0.0154	0.01627
604	0.97221	-0.72683	0.37871	-0.83066	604	0.01984	0.01658	0.01546	0.01628
603.9	1.08693	-0.72722	0.46925	-0.86373	603.9	0.01989	0.01665	0.01552	0.01631
603.8	0.68547	-0.52607	0.32288	-0.96802	603.8	0.01993	0.01673	0.01555	0.01633
603.7	0.68284	-0.71376	0.648	-0.85995	603.7	0.01998	0.01675	0.01555	0.01638
603.6	0.88959	-0.22486	0.64035	-1.11401	603.6	0.02	0.0168	0.01563	0.01643
603.5	0.69963	0.05853	0.64053	-0.95267	603.5	0.02006	0.01687	0.01567	0.01647
603.4	0.57851	-0.04194	0.63342	-0.81621	603.4	0.0201	0.01694	0.01567	0.0165
603.3	0.46941	0.11572	0.7606	-0.79698	603.3	0.02011	0.01698	0.0157	0.01653
603.2	0.57474	0.27397	0.76944	-0.76463	603.2	0.02017	0.01702	0.01572	0.01658
603.1	0.53979	0.23129	0.86533	-0.94733	603.1	0.02024	0.01707	0.01572	0.01661
603	0.69635	0.80863	0.75733	-0.83522	603	0.02026	0.0171	0.01574	0.01669
602.9	0.84175	0.72278	0.78474	-0.91609	602.9	0.02034	0.01717	0.01575	0.01673
602.8	0.62627	1.03728	0.66843	-0.94072	602.8	0.02042	0.01722	0.01576	0.01682
602.7	0.6076	1.20903	0.74089	-0.84778	602.7	0.02045	0.01726	0.01582	0.0169
602.6	0.84714	1.52399	0.77532	-0.75719	602.6	0.02048	0.01731	0.0159	0.01695
602.5	1.29337	1.50333	0.58729	-0.81533	602.5	0.02056	0.01733	0.01592	0.01699
602.4	1.58908	1.56245	0.69612	-0.79681	602.4	0.0206	0.01739	0.01594	0.01701
602.3	1.67971	1.6999	0.60389	-0.6696	602.3	0.02061	0.01742	0.01599	0.01704
602.2	1.32583	1.61841	0.36291	-0.4275	602.2	0.02066	0.01748	0.01605	0.01712
602.1	1.59475	1.82473	0.46552	-0.43984	602.1	0.02072	0.01754	0.01611	0.01714
602	1.42245	1.94138	0.78158	-0.67594	602	0.02071	0.01759	0.0162	0.01715
601.9	1.27957	1.92889	0.71906	-0.7259	601.9	0.02073	0.0176	0.01619	0.01718
601.8	1.10757	1.94086	0.4042	-0.37396	601.8	0.02076	0.01762	0.01618	0.01719
601.7	0.95357	1.85644	0.29984	-0.1536	601.7	0.02081	0.01763	0.01623	0.01722
601.6	0.96994	1.45855	0.24595	-0.35637	601.6	0.02085	0.01767	0.01625	0.01723
601.5	1.02312	1.72626	0.12772	-0.22815	601.5	0.02088	0.01769	0.01628	0.01724
601.4	1.3131	1.50127	0.19116	0.13503	601.4	0.02096	0.01771	0.01633	0.01727
601.3	1.18907	1.50747	0.0817	-0.02242	601.3	0.02103	0.01771	0.01635	0.01731
601.2	1.38166	1.84998	0.34592	-0.09825	601.2	0.02109	0.01775	0.01642	0.01735
601.1	1.43902	1.65433	0.02713	-0.22471	601.1	0.02111	0.01781	0.01648	0.01739
601	1.40358	1.65401	0.08503	-0.04712	601	0.02112	0.01784	0.01655	0.01742
600.9	1.59363	1.8609	0.14858	-0.08996	600.9	0.02114	0.01793	0.01654	0.01747
600.8	1.62741	1.87573	0.06229	-0.12081	600.8	0.02114	0.01794	0.01655	0.01749
600.7	1.47254	2.15625	0.11041	-0.06458	600.7	0.0212	0.01796	0.01653	0.01755
600.6	1.91571	2.238	0.19024	0.09307	600.6	0.02122	0.01797	0.01655	0.01756
600.5	1.81158	2.33877	-0.02621	0.35861	600.5	0.02122	0.018	0.0166	0.01761
600.4	1.38546	2.0678	0.34914	0.41498	600.4	0.02125	0.01803	0.01658	0.01763
600.3	1.70018	1.97779	0.41996	0.34478	600.3	0.0213	0.01804	0.01664	0.01764
600.2	2.04096	1.95837	0.50562	0.53674	600.2	0.02132	0.01807	0.01668	0.01769
600.1	1.77821	1.90624	0.62986	0.24011	600.1	0.02138	0.01808	0.01672	0.01769
600	1.73368	1.80141	0.6016	0.38449	600	0.02143	0.01809	0.01678	0.01771
599.9	1.42758	1.6638	0.45233	0.33321	599.9	0.02149	0.01811	0.01687	0.01771
599.8	1.35984	1.73043	0.4017	0.22388	599.8	0.02158	0.01816	0.01692	0.01773
599.7	1.57579	1.77063	0.4567	0.25616	599.7	0.02164	0.01818	0.01695	0.01774
599.6	1.69499	1.46386	0.59922	0.49432	599.6	0.02171	0.01821	0.017	0.01779
599.5	1.95111	1.34828	0.44946	0.40841	599.5	0.02176	0.01821	0.01704	0.01782
599.4	1.70851	1.16613	0.31351	0.28672	599.4	0.02178	0.01823	0.01701	0.01788
599.3	1.23884	0.86481	0.32666	0.54315	599.3	0.02179	0.01829	0.01701	0.01792
599.2	1.02215	0.81237	0.50832	0.73584	599.2	0.02181	0.01832	0.01704	0.01794
599.1	0.80814	0.54375	0.52376	0.35617	599.1	0.02184	0.01835	0.01708	0.01797
599	1.1328	0.79689	0.41521	0.34224	599	0.0219	0.0184	0.01712	0.018
598.9	1.13177	0.85704	0.52177	0.19664	598.9	0.0219	0.01843	0.01712	0.01803
598.8	0.68131	1.0079	0.39565	0.26371	598.8	0.02194	0.01844	0.01716	0.0181
598.7	0.58606	0.68873	0.10686	0.35831	598.7	0.02201	0.01848	0.01721	0.01815
598.6	0.2888	0.94656	-0.08439	0.37521	598.6	0.02206	0.01853	0.01728	0.01819
598.5	0.28207	0.88386	0.1432	0.28121	598.5	0.02213	0.01857	0.01735	0.01822
598.4	0.61583	0.88888	0.07012	0.17811	598.4	0.02221	0.01859	0.01742	0.01829
598.3	0.69431	0.89367	0.21784	0.01221	598.3	0.02229	0.01864	0.01746	0.01835
598.2	0.76994	0.96444	0.15398	0.01929	598.2	0.02232	0.01872	0.01748	0.01839
598.1	0.45492	0.5204	0.21174	0.28564	598.1	0.02232	0.0188	0.01752	0.01844
598	0.37168	0.5568	0.09965	0.44905	598	0.02233	0.01885	0.01756	0.01847
597.9	0.22832	0.45888	0.20582	0.23038	597.9	0.02235	0.01888	0.01758	0.01851
597.8	0.38565	0.33145	0.42303	0.28237	597.8	0.02241	0.01889	0.0176	0.01853
597.7	0.37237	0.42668	0.37843	0.43915	597.7	0.02245	0.01893	0.01759	0.01855
597.6	0.44308	0.61359	0.61178	0.61672	597.6	0.02248	0.01896	0.01765	0.01857
597.5	0.30103	0.25337	0.56697	0.46793	597.5	0.02253	0.01896	0.01769	0.01861
597.4	0.11126	0.06028	0.47223	0.31469	597.4	0.02259	0.01902	0.01773	0.01865
597.3	0.00239	0.31444	0.77371	0.27774	597.3	0.02266	0.01901	0.01778	0.01869
597.2	-0.02608	0.11904	0.56478	0.0729	597.2	0.02275	0.01906	0.01783	0.0187
597.1	0.40915	0.41572	0.31785	0.36224	597.1	0.02278	0.01909	0.01789	0.01875
597	0.06113	0.14227	0.29062	0.24478	597	0.02285	0.01913	0.01793	0.01879
596.9	0.26441	-0.24674	0.24899	0.10639	596.9	0.02291	0.0192	0.01799	0.01883
596.8	0.71011	-0.28537	-0.10851	0.02606	596.8	0.02294	0.01922	0.01796	0.01893
596.7	0.95588	-0.29411	0.26934	0.05077	596.7	0.02294	0.01926	0.01802	0.01898
596.6	1.06197	-0.15667	0.12071	0.24988	596.6	0.02295	0.01929	0.01802	0.01901
596.5	1.22667	-0.10069	0.41224	0.42566	596.5	0.02293	0.01933	0.01808	0.01908
596.4	0.97972	-0.02951	0.06229	0.57447	596.4	0.02293	0.01935	0.01813	0.0191
596.3	0.79468	0.15139	0.08974	0.68621	596.3	0.02296	0.0194	0.01817	0.01912
596.2	0.4693	0.02892	0.05306	0.67426	596.2	0.02301	0.01945	0.01819	0.01916
596.1	0.70136	0.05742	0.00629	0.52283	596.1	0.02306	0.0195	0.0182	0.01917
596	0.87968	0.4198	-0.06707	0.39426	596	0.02313	0.01957	0.01827	0.0192
595.9	1.01846	0.7191	-0.06892	0.06002	595.9	0.0232	0.01957	0.01829	0.01925
595.8	1.19936	1.10196	0.00154	0.23309	595.8	0.02327	0.01961	0.01834	0.01928
595.7	1.21132	1.07831	-0.18252	-0.03819	595.7	0.02335	0.01964	0.01838	0.01932
595.6	1.45625	0.80184	-0.53151	0.07852	595.6	0.02341	0.01969	0.01841	0.01936
595.5	1.58914	0.68934	-0.53389	0.18024	595.5	0.02349	0.01975	0.01841	0.01939
595.4	1.61715	0.71701	-0.54529	0.21074	595.4	0.0235	0.01981	0.01844	0.01942
595.3	1.86964	0.59423	-0.52669	0.32124	595.3	0.02353	0.01984	0.01846	0.01949
595.2	1.90823	0.33924	-0.62151	-0.02898	595.2	0.02353	0.01988	0.01853	0.01952
595.1	1.74506	0.46446	-0.63576	0.04292	595.1	0.02357	0.01988	0.01855	0.01955
595	1.73248	0.42441	-0.69508	0.2822	595	0.02358	0.01993	0.01857	0.01956
594.9	1.73335	0.3192	-0.86114	0.03042	594.9	0.02362	0.01997	0.01863	0.01958
594.8	2.09541	0.42422	-0.91512	-0.18991	594.8	0.02367	0.01997	0.01866	0.01958
594.7	2.16459	0.36404	-1.02247	-0.22981	594.7	0.0237	0.02002	0.01871	0.01961
594.6	2.09754	0.32695	-1.08625	-0.23604	594.6	0.02379	0.02008	0.01878	0.01964
594.5	2.02295	0.2782	-1.07871	-0.11358	594.5	0.02384	0.02011	0.01884	0.01968
594.4	1.90161	0.24058	-0.8827	-0.56266	594.4	0.02389	0.02013	0.01889	0.01971
594.3	1.55511	0.12327	-1.11455	-0.76721	594.3	0.02399	0.02018	0.01892	0.01979
594.2	2.07522	0.19154	-1.35356	-0.81035	594.2	0.02403	0.02024	0.019	0.01983
594.1	2.16846	0.1462	-1.3417	-0.66898	594.1	0.02408	0.02025	0.01907	0.01987
594	2.09656	0.11914	-1.09848	-0.51014	594	0.0241	0.02033	0.0191	0.01993
593.9	2.37368	0.06376	-1.0605	-0.44515	593.9	0.02416	0.02037	0.01909	0.01997
593.8	2.34166	-0.01244	-1.00305	-0.26633	593.8	0.02419	0.02044	0.01914	0.02003
593.7	2.03992	0.23374	-1.03352	-0.18045	593.7	0.02422	0.02049	0.01916	0.02007
593.6	1.86057	0.64755	-1.10641	-0.28172	593.6	0.02425	0.02054	0.01919	0.02012
593.5	1.64682	0.48813	-1.07273	-0.52892	593.5	0.02432	0.02061	0.01925	0.02017
593.4	1.39685	0.4994	-1.25285	-0.56326	593.4	0.02437	0.02068	0.01923	0.02024
593.3	1.40522	0.41442	-0.79607	-0.92088	593.3	0.02443	0.02072	0.01929	0.02026
593.2	1.25625	0.25166	-1.08208	-1.15893	593.2	0.0245	0.02075	0.01931	0.0203
593.1	1.30189	-0.16634	-1.00869	-1.00856	593.1	0.02457	0.0208	0.01936	0.02035
593	1.32816	0.08826	-1.15542	-1.39324	593	0.02462	0.02084	0.01939	0.0204
592.9	1.56899	0.20528	-1.10575	-1.32867	592.9	0.02465	0.02088	0.01946	0.02044
592.8	1.28906	0.4558	-1.12754	-1.35671	592.8	0.02473	0.02092	0.01955	0.02048
592.7	1.43639	0.16366	-0.81324	-1.33207	592.7	0.02479	0.02092	0.01963	0.02053
592.6	1.39372	-0.15058	-0.89193	-1.15287	592.6	0.02483	0.02097	0.01971	0.02057
592.5	1.35248	-0.3903	-1.26518	-1.06563	592.5	0.02488	0.02105	0.01973	0.02062
592.4	1.07918	-0.69587	-1.29797	-1.24314	592.4	0.02492	0.0211	0.01977	0.02067
592.3	0.82093	-0.63574	-0.88898	-0.98287	592.3	0.02495	0.02114	0.0198	0.0207
592.2	0.74183	-0.38479	-0.71104	-0.93203	592.2	0.02501	0.02114	0.01982	0.02075
592.1	0.83931	-0.35918	-0.40721	-0.77125	592.1	0.02504	0.02115	0.01984	0.02079
592	0.87032	-0.55073	-0.46713	-0.63438	592	0.02508	0.02122	0.01988	0.02082
591.9	0.65221	-0.09573	-0.3833	-0.69618	591.9	0.02516	0.02125	0.0199	0.02089
591.8	0.33762	-0.10677	-0.33134	-0.2418	591.8	0.02521	0.02133	0.01991	0.02093
591.7	0.36331	-0.21747	-0.52722	-0.2799	591.7	0.0253	0.02139	0.01995	0.02099
591.6	0.28229	0.06492	-0.1547	-0.42705	591.6	0.02538	0.02145	0.01999	0.02106
591.5	0.05968	0.39739	-0.48543	-0.52017	591.5	0.02542	0.0215	0.02002	0.02112
591.4	0.00975	0.45618	-0.27638	-0.65138	591.4	0.0255	0.02157	0.0201	0.02122
591.3	0.37686	0.55312	-0.44893	-0.43253	591.3	0.02556	0.0216	0.02015	0.02127
591.2	0.47659	0.8888	-0.54232	-0.31026	591.2	0.02561	0.02164	0.0202	0.02128
591.1	0.51619	0.80903	-0.82931	-0.09577	591.1	0.02561	0.02173	0.02024	0.02131
591	0.58221	0.52625	-0.83732	-0.3003	591	0.02565	0.02172	0.02027	0.02138
590.9	0.40048	0.67292	-0.91145	-0.33959	590.9	0.02567	0.02176	0.02028	0.0214
590.8	0.49554	0.49879	-0.73417	-0.24102	590.8	0.02573	0.02181	0.02032	0.02143
590.7	0.25914	0.38276	-1.2482	-0.13228	590.7	0.0258	0.02184	0.02036	0.02151
590.6	0.28893	0.49572	-1.12662	-0.29624	590.6	0.02583	0.02185	0.02042	0.02154
590.5	0.54981	0.30297	-1.21262	-0.39149	590.5	0.02588	0.02188	0.02046	0.02156
590.4	0.3468	0.49035	-1.21929	-0.51607	590.4	0.02592	0.02192	0.02052	0.0216
590.3	0.36152	0.63709	-1.17382	-0.16763	590.3	0.02594	0.02192	0.02056	0.02165
590.2	0.2814	0.80449	-0.87879	0.09796	590.2	0.026	0.02197	0.02066	0.02167
590.1	0.49057	1.18845	-1.03153	0.41798	590.1	0.0261	0.02201	0.02075	0.02167
590	0.62062	1.24286	-1.16075	0.33912	590	0.02616	0.02207	0.02079	0.02174
589.9	0.77738	1.18374	-1.04016	0.78262	589.9	0.0262	0.02212	0.02083	0.02181
589.8	0.61907	1.51886	-0.96501	0.52636	589.8	0.02626	0.02217	0.02086	0.02187
589.7	0.79516	1.08247	-0.76016	0.43918	589.7	0.02629	0.02221	0.02088	0.0219
589.6	1.16629	1.0128	-0.72613	-0.04755	589.6	0.02637	0.02225	0.02091	0.02195
589.5	1.20227	0.63706	-0.70163	0.16418	589.5	0.02638	0.02231	0.0209	0.022
589.4	1.07121	0.47627	-0.92623	0.12465	589.4	0.02641	0.02235	0.02091	0.02206
589.3	0.79679	0.84175	-0.94298	0.13365	589.3	0.02644	0.02241	0.02093	0.02211
589.2	0.83492	0.76156	-0.48018	0.3303	589.2	0.02644	0.02245	0.02099	0.02219
589.1	0.61215	0.98869	-0.55031	0.54478	589.1	0.02648	0.02248	0.02105	0.02223
589	0.78498	1.08031	-0.61475	0.58003	589	0.02651	0.02254	0.02111	0.02228
588.9	0.92771	0.98008	-0.43175	0.41845	588.9	0.02659	0.02261	0.02118	0.02232
588.8	1.05618	1.08559	-0.72368	0.67782	588.8	0.02669	0.02266	0.02124	0.02239
588.7	1.04773	0.99259	-0.52458	0.56762	588.7	0.02675	0.02272	0.02129	0.02245
588.6	1.2204	1.23742	-0.3858	0.51986	588.6	0.02681	0.02279	0.02135	0.02249
588.5	1.18163	1.119	-0.12047	0.34962	588.5	0.0269	0.02281	0.0214	0.02253
588.4	1.16566	1.20663	0.44139	0.28103	588.4	0.02694	0.02286	0.02144	0.02256
588.3	0.93786	1.04655	0.56594	0.35001	588.3	0.02695	0.02289	0.02146	0.02259
588.2	1.22884	0.67128	0.87448	0.6166	588.2	0.02699	0.02291	0.02152	0.02264
588.1	1.0647	0.51271	0.77094	0.87654	588.1	0.02704	0.02292	0.0215	0.02264
588	0.78812	0.69544	1.14286	0.68797	588	0.02708	0.02297	0.02156	0.02269
587.9	1.09622	0.65802	0.9201	0.45299	587.9	0.02711	0.02303	0.02158	0.02276
587.8	0.53613	0.61163	0.72303	0.57618	587.8	0.0272	0.02307	0.02165	0.02284
587.7	0.2598	0.85278	0.82962	0.49631	587.7	0.02726	0.02314	0.02169	0.02286
587.6	0.47517	0.94852	0.78356	0.14104	587.6	0.02733	0.0232	0.02176	0.02293
587.5	0.34329	0.91139	0.79682	-0.12277	587.5	0.02739	0.02325	0.02181	0.02295
587.4	0.45971	0.79902	0.7268	-0.24053	587.4	0.02749	0.02331	0.02187	0.02301
587.3	0.28843	0.61523	0.81897	-0.11908	587.3	0.02759	0.02341	0.02193	0.02305
587.2	-0.13449	0.56027	0.92167	-0.38616	587.2	0.02769	0.02347	0.02193	0.02312
587.1	0.1358	0.24203	0.86215	-0.26087	587.1	0.02776	0.02354	0.02195	0.02317
587	0.40435	-0.21554	0.64123	-0.47212	587	0.02783	0.02358	0.02196	0.0232
586.9	0.34255	-0.47149	0.58352	-0.45331	586.9	0.02786	0.02364	0.02198	0.02328
586.8	0.4016	-0.48778	0.61538	-0.38459	586.8	0.02787	0.02367	0.02199	0.02332
586.7	0.37161	-0.85698	0.46784	-0.07902	586.7	0.02792	0.02373	0.02203	0.02336
586.6	0.84373	-0.58912	0.55651	-0.36104	586.6	0.02793	0.0238	0.02208	0.02337
586.5	0.69376	-0.56096	0.80634	0.00986	586.5	0.02801	0.02387	0.02217	0.02343
586.4	0.14043	-0.32633	0.24013	0.56214	586.4	0.02807	0.02392	0.02223	0.02349
586.3	-0.2007	-0.29456	0.25263	1.02919	586.3	0.02817	0.02398	0.02228	0.02352
586.2	-0.25868	-0.3308	0.26118	0.96282	586.2	0.02826	0.02403	0.0224	0.02358
586.1	0.1197	-0.23407	0.46914	1.01997	586.1	0.02835	0.02409	0.02247	0.02361
586	0.38135	-0.52212	0.2959	0.75827	586	0.02841	0.02415	0.02251	0.02366
585.9	0.53189	-0.47178	-0.03473	0.81269	585.9	0.0285	0.0242	0.02258	0.02368
585.8	1.16081	-0.36731	0.04767	1.03731	585.8	0.02858	0.02426	0.02262	0.02376
585.7	1.34977	0.02085	-0.00738	0.96974	585.7	0.02866	0.02433	0.02266	0.02379
585.6	0.8328	-0.09758	0.17057	0.81138	585.6	0.02871	0.02438	0.02267	0.02382
585.5	1.09102	0.2337	0.25714	0.51192	585.5	0.02875	0.02442	0.02273	0.02386
585.4	0.98032	0.24643	0.21665	0.51301	585.4	0.02878	0.02446	0.02279	0.02391
585.3	0.69088	-0.0894	0.2159	0.38338	585.3	0.0288	0.02449	0.02286	0.02394
585.2	0.80682	0.09385	0.28526	0.28469	585.2	0.0288	0.02456	0.02294	0.02398
585.1	1.1064	0.13555	-0.46462	0.51792	585.1	0.02886	0.0246	0.02299	0.02402
585	0.88094	0.57892	-0.15192	0.67	585	0.02892	0.02467	0.02306	0.02409
584.9	0.8658	0.87027	-0.22031	0.58462	584.9	0.029	0.02474	0.0231	0.02415
584.8	1.11206	0.94901	-0.3312	0.5777	584.8	0.02909	0.02482	0.02316	0.02422
584.7	1.30527	0.87012	-0.48827	0.62689	584.7	0.02916	0.02488	0.02318	0.02428
584.6	1.13572	0.65565	-0.22755	0.94149	584.6	0.02924	0.02492	0.02326	0.02432
584.5	1.68236	0.68397	-0.13997	0.7097	584.5	0.02931	0.02497	0.02334	0.02438
584.4	1.38782	0.3379	0.3389	0.35849	584.4	0.02938	0.02503	0.0234	0.02444
584.3	1.03797	0.53765	0.46096	1.1106	584.3	0.02946	0.02506	0.02346	0.02451
584.2	1.40526	0.5924	0.35714	1.26414	584.2	0.02951	0.02514	0.02351	0.02459
584.1	1.83336	0.69249	-0.0164	1.2648	584.1	0.0295	0.02522	0.02354	0.02463
584	1.74413	0.91291	0.1831	1.08871	584	0.02954	0.02525	0.02357	0.02469
583.9	1.89279	1.10501	0.16399	1.10585	583.9	0.02957	0.0253	0.02364	0.02475
583.8	1.69575	1.21544	0.01375	1.17415	583.8	0.02961	0.02535	0.02369	0.02478
583.7	1.61427	1.52124	0.16773	0.99511	583.7	0.02967	0.0254	0.02381	0.02484
583.6	1.49563	1.65581	0.01344	1.08293	583.6	0.02975	0.02544	0.0239	0.02489
583.5	1.67555	1.22456	-0.09958	0.85196	583.5	0.02985	0.0255	0.02396	0.02493
583.4	1.584	1.28986	-0.04957	0.87668	583.4	0.02991	0.02555	0.02404	0.025
583.3	1.21166	1.13157	0.07717	0.84235	583.3	0.03002	0.02562	0.02411	0.02505
583.2	1.43801	1.32644	-0.2597	0.62914	583.2	0.03011	0.02567	0.02417	0.02509
583.1	1.4479	0.96638	0.06538	0.38711	583.1	0.03017	0.02572	0.02424	0.02512
583	1.92291	0.63542	0.07618	0.10047	583	0.03022	0.02579	0.02431	0.02521
582.9	2.0597	0.62824	0.16367	-0.12039	582.9	0.03026	0.02585	0.02432	0.02527
582.8	2.02634	0.73332	0.25156	-0.04755	582.8	0.03033	0.0259	0.02433	0.02534
582.7	1.94546	1.07416	-0.06393	-0.21089	582.7	0.03041	0.02595	0.0244	0.02541
582.6	1.6004	1.00813	0.09242	-0.03119	582.6	0.03047	0.026	0.02442	0.02546
582.5	1.47461	0.8577	0.16915	-0.14101	582.5	0.03051	0.02604	0.02446	0.02551
582.4	1.27607	0.29935	-0.0195	-0.44619	582.4	0.03055	0.02609	0.02455	0.02556
582.3	1.56784	0.28077	-0.16216	-0.39571	582.3	0.03059	0.02613	0.02464	0.02562
582.2	1.37168	0.58514	-0.2174	0.01638	582.2	0.03065	0.02617	0.02472	0.0257
582.1	1.19164	0.31569	-0.29166	-0.21098	582.1	0.03072	0.02627	0.02477	0.02575
582	1.30313	0.32124	-0.51499	-0.21324	582	0.03081	0.02633	0.02482	0.02579
581.9	1.47778	0.83374	-0.8594	-0.05816	581.9	0.03088	0.02638	0.02487	0.02587
581.8	1.01483	0.52677	-0.4886	-0.19434	581.8	0.03095	0.02646	0.02489	0.02598
581.7	1.02861	0.48775	-0.92385	-0.21519	581.7	0.03104	0.02651	0.02495	0.02603
581.6	1.35763	0.13838	-1.22813	-0.30661	581.6	0.0311	0.02657	0.02503	0.02606
581.5	1.20473	-0.13063	-0.89235	-0.4898	581.5	0.03115	0.02663	0.0251	0.02613
581.4	1.22868	-0.0902	-0.94228	-0.65127	581.4	0.03121	0.02667	0.02516	0.02616
581.3	0.97529	-0.20714	-1.3878	-0.54328	581.3	0.03128	0.02673	0.02522	0.0262
581.2	1.11473	-0.19744	-1.56601	-0.20672	581.2	0.03133	0.02679	0.02529	0.02624
581.1	1.28167	-0.0679	-1.7029	0.2333	581.1	0.0314	0.02685	0.02531	0.02631
581	1.66403	-0.08439	-2.10874	0.22159	581	0.03146	0.02693	0.02534	0.02634
580.9	1.58785	0.28826	-2.02112	-0.25827	580.9	0.03155	0.02698	0.02543	0.02639
580.8	1.74825	0.12396	-1.70929	0.24788	580.8	0.03165	0.027	0.02549	0.02643
580.7	1.76682	0.13617	-1.67622	0.46075	580.7	0.03174	0.02702	0.02554	0.0265
580.6	1.72851	0.29266	-1.79333	0.4669	580.6	0.0318	0.02706	0.02558	0.02656
580.5	2.12053	0.17672	-1.93155	0.9033	580.5	0.03185	0.02708	0.02563	0.02664
580.4	1.8262	0.19095	-1.88109	0.91851	580.4	0.03193	0.02712	0.02571	0.02671
580.3	1.88537	0.25675	-1.94411	0.79987	580.3	0.03198	0.02717	0.02575	0.02678
580.2	1.66623	0.33284	-1.88116	0.60617	580.2	0.03203	0.0272	0.02581	0.02685
580.1	1.47354	0.62246	-1.90766	0.65002	580.1	0.0321	0.02723	0.02585	0.02693
580	1.47813	0.74565	-2.04884	0.53323	580	0.03216	0.02729	0.0259	0.027
579.9	0.91612	0.73764	-1.96773	0.57724	579.9	0.03222	0.02737	0.02593	0.02707
579.8	1.75269	0.74597	-2.00284	0.2877	579.8	0.0323	0.02741	0.02596	0.02712
579.7	1.55773	0.79649	-1.99601	0.66823	579.7	0.03235	0.02746	0.02601	0.02717
579.6	1.60487	1.09646	-1.64965	0.85453	579.6	0.0324	0.0275	0.02606	0.02724
579.5	1.40253	1.42237	-2.06278	0.89799	579.5	0.03247	0.02759	0.02612	0.02729
579.4	1.56553	1.42554	-2.19476	1.10733	579.4	0.03252	0.02767	0.02618	0.02736
579.3	1.7373	1.37465	-2.20461	1.17501	579.3	0.03257	0.02769	0.02624	0.02741
579.2	1.50271	1.20191	-1.78804	1.54125	579.2	0.03264	0.02776	0.02629	0.02747
579.1	1.62238	1.30735	-1.61112	1.66688	579.1	0.03272	0.02779	0.02638	0.02751
579	1.56327	1.71142	-1.8834	1.74429	579	0.03276	0.02784	0.02642	0.02757
578.9	1.69813	1.49549	-1.91742	1.39807	578.9	0.0328	0.0279	0.02642	0.02761
578.8	1.86067	1.38645	-2.01893	1.93788	578.8	0.03286	0.02792	0.02646	0.02765
578.7	2.64733	1.60865	-2.14063	1.65756	578.7	0.03293	0.02798	0.02654	0.02775
578.6	2.7433	1.22499	-1.8449	1.69474	578.6	0.033	0.02805	0.02659	0.02781
578.5	3.1591	1.8034	-1.9944	1.89577	578.5	0.03306	0.02808	0.02665	0.02786
578.4	3.39014	1.53855	-1.83804	1.94551	578.4	0.0331	0.02816	0.02668	0.02793
578.3	3.12814	1.51583	-1.69649	1.93609	578.3	0.03319	0.02823	0.02675	0.02801
578.2	2.89662	1.79741	-1.83536	2.04093	578.2	0.03323	0.02832	0.02681	0.02807
578.1	2.77759	1.97153	-1.54632	1.97836	578.1	0.03329	0.0284	0.02685	0.02815
578	3.12951	2.11185	-1.02898	1.7121	578	0.03334	0.02849	0.02691	0.02824
577.9	3.16932	1.9966	-0.99086	1.65107	577.9	0.03338	0.02859	0.02695	0.02832
577.8	2.73478	1.812	-0.62248	1.77913	577.8	0.03342	0.02863	0.02702	0.02838
577.7	2.61987	1.78152	-0.43185	1.59889	577.7	0.03349	0.02868	0.02705	0.02847
577.6	2.44928	1.4897	-0.21759	1.8738	577.6	0.03351	0.02871	0.02709	0.02849
577.5	1.71645	1.47421	-0.03969	1.59428	577.5	0.03356	0.02877	0.02711	0.02856
577.4	1.67891	1.54588	-0.16622	1.58383	577.4	0.03361	0.02886	0.02719	0.02861
577.3	1.99577	1.54659	0.24991	1.99323	577.3	0.03369	0.02894	0.02725	0.02866
577.2	1.69867	1.50289	0.08778	2.05363	577.2	0.0338	0.02907	0.02733	0.02871
577.1	1.99396	1.63025	0.20327	2.22154	577.1	0.0339	0.02915	0.02738	0.02877
577	1.61155	1.71581	0.08105	2.29779	577	0.03398	0.02925	0.02743	0.02882
576.9	1.16265	1.83505	0.33932	2.51515	576.9	0.03404	0.02933	0.02748	0.02886
576.8	1.3218	1.78612	0.47365	2.35673	576.8	0.0341	0.02944	0.0276	0.02892
576.7	1.69319	1.80306	0.68036	2.42314	576.7	0.03417	0.0295	0.02768	0.02897
576.6	1.51459	1.47186	0.84302	2.2332	576.6	0.03425	0.02956	0.02773	0.02904
576.5	1.65492	1.83402	0.81241	2.42321	576.5	0.0343	0.02966	0.0278	0.02913
576.4	1.33657	2.02479	0.89443	2.0692	576.4	0.03436	0.02977	0.02788	0.02919
576.3	1.44917	1.91767	0.60089	2.12965	576.3	0.03441	0.0298	0.02795	0.02926
576.2	1.63032	1.61019	0.56585	2.14787	576.2	0.03442	0.02983	0.02801	0.02931
576.1	1.71985	1.96262	0.62457	1.93104	576.1	0.03448	0.02992	0.02808	0.02937
576	1.63874	1.92341	0.82046	1.63606	576	0.03456	0.02997	0.02811	0.02942
575.9	1.5251	1.99288	0.57656	1.52628	575.9	0.03465	0.03004	0.02816	0.02948
575.8	1.32707	1.80892	0.55273	1.35752	575.8	0.03475	0.03015	0.02819	0.02957
575.7	1.30069	1.78104	0.62985	1.33544	575.7	0.03487	0.03022	0.02823	0.02965
575.6	0.88751	1.67125	0.71827	0.74495	575.6	0.03497	0.0303	0.02831	0.0297
575.5	0.38608	1.89168	0.88957	0.83375	575.5	0.03512	0.03036	0.02836	0.02978
575.4	-0.14737	1.60272	1.1713	1.08631	575.4	0.03521	0.03045	0.02844	0.02985
575.3	-0.38525	1.49207	0.71736	0.93515	575.3	0.03535	0.03051	0.02854	0.02988
575.2	-0.39558	1.64805	1.12446	0.73465	575.2	0.03543	0.03057	0.02863	0.02995
575.1	-0.4698	1.82539	1.49327	0.89717	575.1	0.03547	0.03062	0.0287	0.02998
575	-0.41555	1.43441	1.41268	0.98753	575	0.03552	0.03064	0.02877	0.03006
574.9	-0.47206	1.4721	1.03711	1.25529	574.9	0.03555	0.03072	0.02881	0.03013
574.8	0.02268	1.84068	1.07422	1.88505	574.8	0.03563	0.03078	0.02888	0.03019
574.7	-0.35483	1.75793	0.53842	2.0532	574.7	0.03569	0.03082	0.02895	0.03024
574.6	-0.21251	1.90849	0.50119	2.28944	574.6	0.03578	0.03086	0.02896	0.03035
574.5	0.27685	2.06394	0.09671	1.87209	574.5	0.03583	0.03097	0.02909	0.03045
574.4	0.53088	2.0689	-0.00572	2.41307	574.4	0.03591	0.03106	0.02916	0.03054
574.3	0.95173	2.16244	-0.2932	2.43147	574.3	0.036	0.03116	0.02923	0.03063
574.2	0.74968	2.06535	-0.02321	2.27317	574.2	0.0361	0.03121	0.02932	0.03071
574.1	1.02767	2.01029	-0.28599	2.13169	574.1	0.03615	0.03129	0.02938	0.03078
574	0.73051	1.62704	-0.24928	2.54438	574	0.03619	0.0313	0.02944	0.03087
573.9	0.86621	1.65539	0.06761	1.71412	573.9	0.03625	0.03135	0.02948	0.03098
573.8	1.3585	1.30942	0.52597	1.27012	573.8	0.03632	0.03142	0.02955	0.03109
573.7	1.50084	1.05722	0.30345	1.43262	573.7	0.03641	0.03145	0.02962	0.03114
573.6	1.6196	0.96067	0.35297	1.649	573.6	0.03648	0.03149	0.02966	0.03121
573.5	1.75461	0.58486	0.22934	1.21073	573.5	0.03656	0.03154	0.02968	0.03127
573.4	1.69168	1.13929	0.28665	1.17807	573.4	0.03663	0.03159	0.02971	0.03136
573.3	1.94287	0.83667	0.22718	0.98826	573.3	0.03672	0.03165	0.02982	0.03141
573.2	1.48175	1.15489	0.52412	1.38274	573.2	0.03683	0.03171	0.02985	0.03148
573.1	1.78875	0.73566	0.57274	0.91032	573.1	0.03698	0.03178	0.02993	0.03152
573	1.53353	0.74479	0.84583	0.97783	573	0.03711	0.03185	0.02999	0.03159
572.9	1.38115	0.68105	1.25053	0.94596	572.9	0.0372	0.03192	0.0301	0.03169
572.8	1.56006	0.69356	1.01481	0.98415	572.8	0.03731	0.032	0.0302	0.03173
572.7	1.58542	0.71749	1.22584	0.73713	572.7	0.03738	0.03207	0.03027	0.03181
572.6	1.78586	0.62918	1.18997	0.77174	572.6	0.03744	0.03213	0.03033	0.03188
572.5	1.6916	0.45152	1.45802	0.95318	572.5	0.03752	0.03216	0.03046	0.03193
572.4	1.51676	0.63303	1.16617	1.45259	572.4	0.03758	0.03225	0.03059	0.03206
572.3	1.86384	0.67348	0.96599	1.2077	572.3	0.03761	0.03233	0.03065	0.03212
572.2	2.38327	0.58964	0.80188	1.44995	572.2	0.03766	0.0324	0.03072	0.03218
572.1	2.60539	0.18415	0.83061	1.50163	572.1	0.0377	0.03252	0.03081	0.03222
572	2.25689	0.02224	0.572	1.51276	572	0.03779	0.03258	0.03086	0.03229
571.9	2.49947	0.21079	0.34779	1.48393	571.9	0.03787	0.03264	0.0309	0.03237
571.8	2.64867	0.65573	0.50842	1.16952	571.8	0.03803	0.03278	0.03096	0.03242
571.7	2.62647	0.53683	0.90281	0.82134	571.7	0.03819	0.03287	0.03102	0.03247
571.6	2.26541	0.01789	0.9728	0.50413	571.6	0.03831	0.03293	0.0311	0.03252
571.5	2.98887	0.08876	1.37462	0.1195	571.5	0.03847	0.033	0.03118	0.03262
571.4	2.78499	-0.19222	1.43311	-0.0791	571.4	0.03854	0.0331	0.03128	0.03268
571.3	2.58751	-0.12813	2.33974	-0.33212	571.3	0.03867	0.03316	0.03136	0.03275
571.2	2.61246	0.01215	2.65724	-0.37773	571.2	0.03875	0.03323	0.03142	0.03283
571.1	2.5782	0.45986	2.86375	-0.22153	571.1	0.03885	0.0333	0.03153	0.03291
571	2.89397	0.0803	2.95795	0.03427	571	0.03888	0.03337	0.0316	0.03297
570.9	2.51163	-0.00133	3.03561	-0.27695	570.9	0.03899	0.03344	0.03167	0.03305
570.8	2.8655	-0.07126	3.12849	-0.47982	570.8	0.03914	0.03351	0.03172	0.03308
570.7	3.16896	0.02274	2.88448	-0.64067	570.7	0.03921	0.03361	0.0318	0.03312
570.6	2.72375	0.41832	2.45365	-0.59176	570.6	0.03931	0.03372	0.03185	0.03315
570.5	2.47943	0.59051	2.62944	-0.5126	570.5	0.03938	0.03383	0.03192	0.0332
570.4	2.32726	0.74927	2.40079	-0.62853	570.4	0.0395	0.03394	0.03202	0.03332
570.3	2.34502	1.04467	2.35821	-0.6029	570.3	0.0396	0.03403	0.03206	0.03339
570.2	2.34035	0.72031	1.80489	-0.73426	570.2	0.03968	0.03409	0.03213	0.03346
570.1	2.33685	0.80327	1.73447	-0.10434	570.1	0.03973	0.03416	0.03217	0.03355
570	2.81952	0.69913	1.43857	-0.39125	570	0.03978	0.03421	0.03227	0.03362
569.9	2.84973	0.42795	1.19332	-0.5865	569.9	0.03982	0.0343	0.03241	0.03372
569.8	2.48296	0.80943	0.93909	-0.08033	569.8	0.03986	0.03437	0.03247	0.0338
569.7	2.19662	0.83937	0.8205	-0.28568	569.7	0.04001	0.03443	0.03253	0.03389
569.6	1.9676	0.90649	0.75386	-0.26908	569.6	0.04005	0.03453	0.03255	0.03394
569.5	2.12247	0.87524	0.99016	-0.86966	569.5	0.04012	0.03459	0.03261	0.03402
569.4	1.79301	0.73093	1.06991	-0.55838	569.4	0.0402	0.03467	0.03268	0.0341
569.3	1.65881	1.07567	0.89871	-0.41067	569.3	0.04033	0.03481	0.03271	0.03416
569.2	1.80713	1.30579	0.60998	-0.38122	569.2	0.04041	0.0349	0.03275	0.03422
569.1	2.21217	1.38243	1.01608	-0.70588	569.1	0.04051	0.03496	0.03277	0.03429
569	1.79768	1.24826	0.9327	-0.74992	569	0.04062	0.03505	0.03283	0.03435
568.9	1.32783	1.56982	1.09347	-0.93934	568.9	0.04076	0.03511	0.03287	0.03448
568.8	1.16411	1.72326	1.36883	-0.91397	568.8	0.04087	0.03515	0.03296	0.03459
568.7	0.72493	1.66892	1.7726	-1.03938	568.7	0.04093	0.03521	0.03303	0.03469
568.6	0.84669	1.57555	1.79303	-1.23118	568.6	0.04102	0.03526	0.03312	0.03481
568.5	0.30183	1.78358	2.00008	-1.31818	568.5	0.04106	0.03528	0.03321	0.03492
568.4	0.40301	1.85557	1.72863	-1.4547	568.4	0.04111	0.03533	0.0333	0.03503
568.3	0.1412	2.20659	1.71465	-1.39674	568.3	0.04117	0.03541	0.03343	0.03512
568.2	-0.58964	2.30405	1.55895	-1.2612	568.2	0.04125	0.03548	0.03348	0.03515
568.1	-0.56371	2.56335	1.56606	-1.13724	568.1	0.04133	0.03555	0.03355	0.03518
568	-0.43035	2.3755	0.86594	-1.02046	568	0.04146	0.03562	0.03361	0.03526
567.9	-0.52195	2.37172	0.3412	-0.88218	567.9	0.04154	0.03571	0.03368	0.03531
567.8	-0.55262	2.06405	-0.02542	-1.49409	567.8	0.04161	0.03581	0.03373	0.03535
567.7	-0.79253	2.12962	-0.08581	-1.73496	567.7	0.04175	0.0359	0.03379	0.03543
567.6	-0.59235	2.34628	-0.01209	-2.0167	567.6	0.04187	0.036	0.03388	0.03549
567.5	-0.84209	2.39314	-0.47884	-2.08284	567.5	0.04198	0.03607	0.03395	0.03558
567.4	-1.01899	2.68338	-0.33513	-1.93312	567.4	0.0421	0.03614	0.03402	0.03566
567.3	-0.94802	2.31592	0.06744	-1.81191	567.3	0.04215	0.03616	0.03413	0.03578
567.2	-1.4192	2.15873	0.25018	-1.7012	567.2	0.04222	0.03624	0.03418	0.03588
567.1	-0.74053	1.94482	0.21982	-2.16087	567.1	0.04229	0.03629	0.03428	0.03595
567	-0.73095	2.06271	-0.11469	-2.16479	567	0.04236	0.03635	0.03436	0.03602
566.9	-0.64081	2.25693	0.21064	-1.90401	566.9	0.04242	0.03644	0.03445	0.03611
566.8	-0.9889	2.3781	0.6924	-1.89438	566.8	0.04256	0.0365	0.03453	0.03619
566.7	-1.52393	2.40886	0.87413	-1.69173	566.7	0.0427	0.03657	0.0346	0.03626
566.6	-2.05234	3.05266	1.20274	-1.5889	566.6	0.04283	0.03669	0.03463	0.03634
566.5	-1.77532	3.03261	1.35818	-1.53897	566.5	0.04291	0.03673	0.0347	0.03637
566.4	-1.61889	2.69926	1.59644	-1.80976	566.4	0.04301	0.03683	0.03478	0.03644
566.3	-1.44281	2.63437	1.22625	-1.87467	566.3	0.0431	0.03691	0.03489	0.03653
566.2	-1.16439	2.19526	0.9514	-1.87441	566.2	0.04324	0.03698	0.03499	0.03663
566.1	-0.96966	2.28657	0.92841	-1.85463	566.1	0.04336	0.03705	0.03505	0.03673
566	-0.94449	2.47479	0.81781	-1.68683	566	0.04349	0.03711	0.03513	0.0368
565.9	-1.15723	2.43608	0.91571	-1.85847	565.9	0.04357	0.03714	0.03526	0.0369
565.8	-1.19994	1.89668	1.35448	-1.72179	565.8	0.04366	0.03716	0.03535	0.037
565.7	-1.20978	2.08284	1.20035	-1.29325	565.7	0.04372	0.03723	0.03543	0.03709
565.6	-1.30421	2.4223	1.0938	-1.13543	565.6	0.04377	0.03729	0.03555	0.03719
565.5	-1.04559	2.19177	1.20903	-0.86711	565.5	0.04383	0.03738	0.03564	0.03722
565.4	-0.5415	2.46737	0.83357	-1.30365	565.4	0.04391	0.03747	0.0357	0.0373
565.3	-0.0859	2.18682	0.75974	-1.14089	565.3	0.04403	0.03758	0.03578	0.03736
565.2	-0.25499	2.26725	0.63901	-0.76561	565.2	0.04411	0.03771	0.03586	0.03744
565.1	-0.39789	2.56246	0.59499	-0.44714	565.1	0.04422	0.03781	0.03594	0.03748
565	0.18183	2.52718	0.72683	-0.53082	565	0.04431	0.03788	0.03598	0.03752
564.9	0.58927	2.4127	0.13031	-0.74163	564.9	0.04444	0.03796	0.03603	0.03758
564.8	0.81804	2.34341	0.02772	-0.79565	564.8	0.04453	0.03807	0.03607	0.03772
564.7	0.76074	2.19747	0.61795	-0.90897	564.7	0.04466	0.03815	0.03622	0.03781
564.6	0.85271	2.3922	0.76829	-0.98373	564.6	0.04477	0.03825	0.0363	0.03788
564.5	1.17597	2.36226	1.00271	-0.12397	564.5	0.0449	0.03831	0.03639	0.03796
564.4	1.13046	2.85552	0.80329	0.09588	564.4	0.04496	0.03836	0.03649	0.03806
564.3	1.59467	3.33467	0.29428	0.07577	564.3	0.04503	0.03841	0.03659	0.03816
564.2	1.73005	3.58084	0.24317	-0.03842	564.2	0.04506	0.03848	0.03664	0.03825
564.1	1.48409	3.56937	0.5978	0.15877	564.1	0.04513	0.03859	0.03675	0.03837
564	1.53351	3.23541	0.76102	0.298	564	0.04524	0.03872	0.03683	0.03843
563.9	1.85387	3.83858	0.43127	0.65375	563.9	0.04535	0.0388	0.03691	0.03855
563.8	1.90313	3.23789	0.6854	0.99745	563.8	0.04547	0.03889	0.037	0.03864
563.7	1.19837	3.1067	1.09716	1.49003	563.7	0.0456	0.03899	0.03709	0.03874
563.6	0.84938	3.11226	1.22692	1.74061	563.6	0.04568	0.03907	0.0372	0.03882
563.5	0.67558	3.18174	1.36275	1.48736	563.5	0.04579	0.03918	0.03729	0.03892
563.4	1.26378	2.96355	1.3133	1.56837	563.4	0.04588	0.03927	0.03737	0.03902
563.3	1.19555	3.11434	1.12823	1.26548	563.3	0.04596	0.03938	0.03748	0.03913
563.2	1.09459	2.6849	0.6866	1.49909	563.2	0.04603	0.03951	0.03757	0.03922
563.1	1.24364	2.52584	0.76137	1.63439	563.1	0.0461	0.03962	0.03766	0.03932
563	1.10055	2.59046	0.95084	1.40732	563	0.04618	0.03976	0.03779	0.0394
562.9	1.22516	2.65273	0.78565	1.33314	562.9	0.04628	0.03986	0.03787	0.03951
562.8	1.06862	2.75467	1.07523	1.30141	562.8	0.04632	0.04001	0.03802	0.03961
562.7	0.9055	2.28037	1.43543	1.4194	562.7	0.0464	0.04016	0.03815	0.0397
562.6	1.57946	2.53767	1.16867	1.41779	562.6	0.04649	0.04026	0.03827	0.0398
562.5	1.73375	2.49814	0.80315	1.30623	562.5	0.04662	0.04041	0.03839	0.03992
562.4	2.05008	2.46714	0.96685	1.11015	562.4	0.04675	0.04051	0.03849	0.03999
562.3	2.38173	2.05656	1.30938	0.99447	562.3	0.04689	0.04061	0.03855	0.04008
562.2	2.46455	1.94482	1.17242	0.93572	562.2	0.047	0.0407	0.03859	0.04016
562.1	2.19488	1.81328	0.95444	1.08388	562.1	0.04708	0.0408	0.03865	0.04026
562	2.2049	2.49851	1.05921	1.62222	562	0.04716	0.04088	0.03872	0.04037
561.9	2.18706	2.54811	1.09375	1.48263	561.9	0.04722	0.04097	0.0388	0.04048
561.8	2.37313	2.60037	0.91563	1.55186	561.8	0.04731	0.04107	0.0389	0.04061
561.7	1.96182	2.96035	1.07333	1.30796	561.7	0.04739	0.04121	0.03904	0.04077
561.6	1.86858	2.8819	1.75738	1.08976	561.6	0.04749	0.04131	0.03915	0.04092
561.5	1.72926	2.5778	1.45222	1.37528	561.5	0.04758	0.0414	0.03928	0.04104
561.4	2.24981	2.454	1.18322	1.42198	561.4	0.04766	0.04152	0.03936	0.04115
561.3	1.91019	3.10483	0.83741	1.65815	561.3	0.04777	0.04165	0.03949	0.0413
561.2	1.92964	2.96434	0.70936	1.30149	561.2	0.04787	0.04171	0.03959	0.0414
561.1	1.65344	3.30392	0.64373	1.79553	561.1	0.048	0.04182	0.0397	0.0415
561	1.36266	3.07597	1.12313	1.86572	561	0.04813	0.04191	0.03979	0.04158
560.9	1.5395	3.11731	0.90688	1.85077	560.9	0.04828	0.04204	0.03989	0.04167
560.8	1.45436	3.0255	0.81392	1.62696	560.8	0.04838	0.0421	0.04001	0.04171
560.7	1.48549	3.06253	0.93754	1.31566	560.7	0.0485	0.04217	0.0401	0.0418
560.6	1.36317	3.00492	0.97168	1.40098	560.6	0.04861	0.04228	0.0402	0.04187
560.5	1.066	3.6035	0.96358	1.00551	560.5	0.0487	0.0424	0.04026	0.04195
560.4	1.62503	3.6814	0.14167	0.38465	560.4	0.04881	0.04253	0.04033	0.04205
560.3	1.577	3.7337	0.53521	0.89363	560.3	0.04898	0.04265	0.04043	0.04219
560.2	1.13913	3.39786	0.61205	0.72465	560.2	0.04908	0.04277	0.04054	0.04228
560.1	1.40385	3.67946	0.9544	0.59765	560.1	0.04918	0.04288	0.04064	0.0424
560	1.36424	3.84586	0.76874	0.56957	560	0.04929	0.04295	0.04072	0.04248
559.9	1.02322	3.9187	0.61891	0.69369	559.9	0.04942	0.04303	0.0408	0.04259
559.8	1.06281	4.1617	0.70018	1.37229	559.8	0.04954	0.04311	0.0409	0.04268
559.7	1.23328	3.79251	0.97734	1.52873	559.7	0.04963	0.04317	0.04096	0.0428
559.6	0.85476	4.03829	0.71394	1.33651	559.6	0.04975	0.04324	0.04101	0.04288
559.5	1.70261	4.73765	0.66173	1.12209	559.5	0.04987	0.04332	0.04109	0.04299
559.4	1.38805	4.69904	0.51561	1.13993	559.4	0.05001	0.04337	0.04116	0.04307
559.3	0.81516	4.72795	0.46328	0.98225	559.3	0.05012	0.04351	0.04123	0.0432
559.2	0.77648	4.86589	1.05558	1.18684	559.2	0.05023	0.04363	0.04132	0.04334
559.1	-0.04873	4.71097	0.76598	1.05513	559.1	0.05033	0.04377	0.04143	0.04347
559	0.18131	4.85655	1.41842	0.72298	559	0.05049	0.04394	0.04157	0.04364
558.9	0.01369	4.67318	1.81884	0.87981	558.9	0.05062	0.04409	0.04167	0.04378
558.8	0.21357	4.05872	2.23158	0.50759	558.8	0.05076	0.04418	0.04179	0.04386
558.7	0.41157	3.30646	2.13389	0.19967	558.7	0.05087	0.0443	0.04194	0.04395
558.6	0.07491	3.49081	2.62884	0.23394	558.6	0.05102	0.04438	0.04206	0.04406
558.5	0.38947	3.05504	2.49911	0.48758	558.5	0.05114	0.04446	0.04213	0.04412
558.4	0.41862	2.87454	2.21852	0.44591	558.4	0.05129	0.04453	0.04225	0.0442
558.3	0.30688	3.38385	2.47771	0.40793	558.3	0.0514	0.04462	0.04236	0.04426
558.2	0.3481	3.36648	2.70791	0.17131	558.2	0.05152	0.04471	0.04246	0.04434
558.1	0.54637	2.79191	2.3281	0.72809	558.1	0.05164	0.04479	0.04255	0.04446
558	0.75588	2.24561	2.96949	0.14935	558	0.05175	0.04489	0.04263	0.04457
557.9	0.8854	2.13492	2.80931	-0.10929	557.9	0.05186	0.04501	0.0427	0.04466
557.8	0.72686	1.8692	2.9397	-0.26917	557.8	0.05195	0.04508	0.04277	0.04475
557.7	0.67538	1.79861	2.64562	-0.57596	557.7	0.05204	0.0452	0.04286	0.04487
557.6	0.42308	1.39662	2.70091	0.15103	557.6	0.05218	0.04532	0.04295	0.04497
557.5	0.72058	1.68252	2.93809	0.09125	557.5	0.05228	0.04549	0.04301	0.04512
557.4	1.19423	1.97902	2.50423	0.26184	557.4	0.05236	0.04564	0.04314	0.04521
557.3	1.11766	2.43065	2.02464	-0.1491	557.3	0.05249	0.04576	0.04325	0.04532
557.2	0.95829	2.05004	1.80466	-0.01156	557.2	0.0526	0.04588	0.04339	0.04542
557.1	1.00675	2.09438	2.10177	0.11844	557.1	0.05273	0.04597	0.04358	0.04556
557	1.3709	2.05357	1.40114	0.29393	557	0.05282	0.04606	0.04376	0.04566
556.9	1.59841	2.15431	1.36448	0.54126	556.9	0.05299	0.04614	0.04388	0.04575
556.8	1.40941	2.05218	1.08258	0.43393	556.8	0.05313	0.0462	0.04404	0.04584
556.7	1.64893	2.05043	1.17341	0.60709	556.7	0.05325	0.04625	0.04414	0.04593
556.6	2.16206	2.59529	0.84503	0.67194	556.6	0.05339	0.04634	0.04421	0.04602
556.5	2.07459	2.76125	0.67871	0.13807	556.5	0.05352	0.04642	0.04428	0.04612
556.4	2.17774	2.4556	1.12904	0.25968	556.4	0.05367	0.04657	0.04439	0.04619
556.3	2.33183	2.53724	1.49867	0.87291	556.3	0.05382	0.04667	0.04449	0.04631
556.2	2.11178	1.90945	1.45291	1.25412	556.2	0.05391	0.04682	0.0446	0.04643
556.1	2.03042	2.68827	1.72808	0.80318	556.1	0.05397	0.04692	0.04472	0.04653
556	2.23999	2.34517	1.54997	0.54661	556	0.05408	0.04704	0.04485	0.04661
555.9	2.15186	2.12381	1.51885	0.24575	555.9	0.05419	0.04711	0.04499	0.04669
555.8	2.74357	2.20692	0.84512	0.41597	555.8	0.0543	0.04718	0.04513	0.0468
555.7	2.85284	2.17621	0.13469	1.06185	555.7	0.05441	0.04725	0.04528	0.0469
555.6	2.79588	2.65603	0.11832	0.75261	555.6	0.05453	0.0473	0.04544	0.04695
555.5	2.70656	2.67786	0.06094	1.39368	555.5	0.05464	0.04741	0.04558	0.04704
555.4	2.29536	3.13308	-0.05657	1.61817	555.4	0.05477	0.04753	0.04567	0.04713
555.3	2.53029	2.82573	-0.59022	1.82832	555.3	0.05486	0.04762	0.04578	0.04722
555.2	3.0753	3.05183	-0.63021	1.62173	555.2	0.05499	0.04776	0.04587	0.04734
555.1	2.59071	2.99162	-0.74792	1.68618	555.1	0.05508	0.04785	0.04595	0.04744
555	1.94391	2.93475	-1.18513	1.94946	555	0.0552	0.04796	0.04605	0.04756
554.9	1.3616	2.80485	-1.00395	2.04171	554.9	0.05535	0.04809	0.04614	0.04769
554.8	1.38905	3.33173	-0.39389	1.33395	554.8	0.05545	0.04825	0.04623	0.04779
554.7	1.07924	3.61466	-0.68142	1.30821	554.7	0.05561	0.04838	0.04635	0.04793
554.6	1.21632	3.60047	-0.69892	1.07983	554.6	0.05573	0.04848	0.04648	0.0481
554.5	1.04319	3.68413	-1.10366	1.12277	554.5	0.05589	0.0486	0.04662	0.04826
554.4	1.09672	4.058	-1.00021	1.13447	554.4	0.05606	0.04867	0.04675	0.04841
554.3	0.88569	4.38533	-0.87686	1.04467	554.3	0.0562	0.0488	0.04685	0.04856
554.2	1.11126	4.36738	-1.24206	0.94799	554.2	0.05635	0.04887	0.04696	0.0487
554.1	0.86102	3.79287	-1.26657	0.86127	554.1	0.05651	0.04896	0.04704	0.04879
554	1.07667	2.77064	-0.59397	1.18725	554	0.05668	0.04905	0.04712	0.04892
553.9	1.05733	2.4125	-0.52855	1.24239	553.9	0.05679	0.04917	0.04719	0.04901
553.8	1.20317	2.90589	-0.34439	1.64707	553.8	0.05693	0.04928	0.04719	0.04909
553.7	1.22801	3.22028	-0.38286	1.42081	553.7	0.05707	0.04941	0.04723	0.0492
553.6	2.34781	3.14943	-0.97402	0.98921	553.6	0.05714	0.04954	0.04734	0.04935
553.5	1.7131	3.06687	-1.25355	0.98141	553.5	0.05723	0.04969	0.04741	0.04946
553.4	2.04394	3.10654	-1.21245	1.23392	553.4	0.05734	0.04983	0.04757	0.04964
553.3	1.52772	2.653	-0.75006	0.77806	553.3	0.05745	0.04994	0.04774	0.04979
553.2	1.75811	2.80079	-0.62857	0.72892	553.2	0.05752	0.05006	0.0479	0.04994
553.1	1.67749	3.00545	-0.86177	0.4729	553.1	0.05765	0.05016	0.04802	0.05004
553	1.47079	2.90534	-1.1394	0.47398	553	0.05775	0.05029	0.04814	0.05011
552.9	1.2749	2.73367	-1.12167	0.76344	552.9	0.05794	0.05041	0.04828	0.05022
552.8	1.40535	2.80691	-1.36933	0.97444	552.8	0.05811	0.05059	0.04838	0.05032
552.7	1.28701	2.87777	-1.43307	1.04556	552.7	0.05827	0.0507	0.04847	0.05039
552.6	1.82583	2.96153	-1.06706	0.98798	552.6	0.05842	0.05082	0.04854	0.05047
552.5	1.22621	2.90489	-0.80305	1.34544	552.5	0.05857	0.05096	0.04863	0.05056
552.4	0.95567	3.16836	-1.02734	0.49765	552.4	0.0587	0.05112	0.04871	0.05071
552.3	0.8438	2.75698	-1.70027	0.46496	552.3	0.05884	0.05126	0.04879	0.05085
552.2	0.30529	3.12574	-1.61203	0.1987	552.2	0.05898	0.05139	0.04892	0.051
552.1	0.11292	3.18815	-1.32507	-0.00787	552.1	0.05912	0.05151	0.04903	0.05114
552	-0.00418	3.15725	-1.34587	-0.12966	552	0.05926	0.05169	0.04917	0.05134
551.9	-0.59856	2.71703	-1.10482	0.2364	551.9	0.05944	0.05182	0.04931	0.05149
551.8	0.41193	2.70833	-1.08865	0.08677	551.8	0.05959	0.05198	0.04946	0.0516
551.7	0.69935	3.02664	-1.00074	0.09891	551.7	0.05971	0.05212	0.04956	0.05171
551.6	1.13908	3.05872	-1.28189	-0.09335	551.6	0.05982	0.05225	0.04972	0.05178
551.5	1.20041	2.7569	-1.36542	-0.06317	551.5	0.06	0.05233	0.04983	0.05187
551.4	1.29155	3.08063	-0.81939	0.17773	551.4	0.06012	0.05243	0.04993	0.05197
551.3	1.16077	3.21707	-1.12755	0.77453	551.3	0.06026	0.05254	0.05	0.05207
551.2	1.42587	3.24101	-1.10044	0.71924	551.2	0.06039	0.05269	0.05007	0.05214
551.1	1.57603	3.0478	-0.87361	0.75745	551.1	0.06052	0.05288	0.05017	0.05225
551	2.09499	3.19314	-0.87299	0.66572	551	0.06061	0.05294	0.05028	0.05235
550.9	1.56203	3.13389	-0.53563	0.86248	550.9	0.06075	0.05304	0.0504	0.05247
550.8	2.22707	3.4956	-0.8701	0.41342	550.8	0.06093	0.0532	0.05058	0.05269
550.7	1.82791	4.1173	-0.99127	0.66597	550.7	0.06107	0.05331	0.05079	0.05283
550.6	1.95913	4.19852	-1.28032	1.22286	550.6	0.06123	0.05346	0.05097	0.05302
550.5	1.89239	3.98832	-1.58995	1.21476	550.5	0.06137	0.05358	0.05114	0.05317
550.4	1.44094	3.85924	-1.34374	0.87717	550.4	0.06152	0.0537	0.0513	0.05331
550.3	1.59091	3.82904	-0.57585	1.29466	550.3	0.06163	0.05386	0.05142	0.05347
550.2	2.01821	3.91182	-0.42973	1.06952	550.2	0.06177	0.05394	0.05152	0.05359
550.1	1.87071	3.47711	-0.51149	1.32743	550.1	0.06188	0.05412	0.05162	0.05367
550	2.06711	2.91026	-0.77695	1.13229	550	0.06202	0.05426	0.0517	0.0538
549.9	2.34849	2.41849	-1.05999	1.49807	549.9	0.06222	0.0544	0.05181	0.05393
549.8	2.10925	2.70315	-1.11613	1.43655	549.8	0.06237	0.05452	0.05194	0.05409
549.7	1.86427	2.28133	-1.28959	1.43519	549.7	0.0626	0.0547	0.05212	0.05427
549.6	1.90789	3.16918	-1.65912	1.7626	549.6	0.06274	0.05482	0.05226	0.05443
549.5	1.69793	3.46365	-2.01577	1.12133	549.5	0.06287	0.05493	0.0524	0.05463
549.4	0.90814	4.0974	-2.41797	1.16173	549.4	0.06301	0.05505	0.05261	0.05483
549.3	1.20405	4.05165	-2.6194	1.3933	549.3	0.06316	0.05519	0.05275	0.05503
549.2	1.41878	3.17751	-2.9888	1.624	549.2	0.06327	0.05534	0.05289	0.0552
549.1	0.94181	3.13688	-2.38146	2.31936	549.1	0.06344	0.05546	0.05301	0.05535
549	1.22466	3.16972	-2.42366	2.19281	549	0.06354	0.05557	0.05313	0.05548
548.9	1.48306	3.05617	-2.66335	2.05627	548.9	0.06369	0.05571	0.05324	0.05558
548.8	1.68833	3.36779	-3.04598	1.88847	548.8	0.06385	0.05587	0.05335	0.05568
548.7	1.58324	2.94554	-2.98475	1.61567	548.7	0.06402	0.05601	0.05346	0.05579
548.6	1.58583	3.15818	-3.56774	1.88954	548.6	0.06417	0.0561	0.05353	0.05591
548.5	0.52798	2.82941	-3.25869	2.21764	548.5	0.06426	0.05622	0.05368	0.05604
548.4	0.58049	2.54332	-3.32583	2.44073	548.4	0.06439	0.0563	0.05379	0.0562
548.3	0.32883	2.58049	-3.2773	2.64416	548.3	0.0645	0.05643	0.05396	0.05637
548.2	0.45899	2.1377	-3.56862	2.56471	548.2	0.06458	0.05659	0.05412	0.05654
548.1	0.25501	2.08052	-3.7282	2.43314	548.1	0.06469	0.05674	0.05427	0.05667
548	0.90165	2.11796	-2.96991	2.2779	548	0.0648	0.05686	0.05444	0.05682
547.9	0.79093	1.62823	-2.92295	2.04586	547.9	0.06496	0.057	0.05468	0.05701
547.8	0.12072	1.43093	-3.06929	2.26768	547.8	0.06509	0.05715	0.05486	0.05715
547.7	0.00844	1.34182	-3.15206	2.00524	547.7	0.06521	0.05733	0.05501	0.05727
547.6	-0.41732	0.57108	-2.99773	2.18386	547.6	0.06532	0.0575	0.05508	0.05738
547.5	-0.48649	0.43876	-3.06775	1.98971	547.5	0.06543	0.05762	0.0552	0.05745
547.4	-1.36189	0.53477	-2.47559	1.83172	547.4	0.06558	0.05775	0.05526	0.0575
547.3	-1.44489	0.28312	-2.69172	1.29413	547.3	0.06568	0.05786	0.05539	0.05759
547.2	-1.14948	0.58399	-2.43466	0.91682	547.2	0.06578	0.05801	0.05547	0.0577
547.1	-1.25884	0.85985	-2.46879	1.05715	547.1	0.06597	0.05818	0.0556	0.05782
547	-1.61856	1.11075	-2.96327	1.64562	547	0.0662	0.0584	0.05578	0.05799
546.9	-1.94789	0.99816	-3.07547	2.2277	546.9	0.0664	0.05854	0.0559	0.05814
546.8	-1.72015	1.60144	-2.66244	2.53262	546.8	0.06654	0.05869	0.05602	0.0583
546.7	-1.6353	1.99531	-2.58861	2.35633	546.7	0.0667	0.05884	0.05618	0.05848
546.6	-1.91679	1.81612	-2.51134	2.50832	546.6	0.06686	0.05899	0.05629	0.05865
546.5	-2.03029	2.15633	-2.65724	2.42276	546.5	0.06699	0.05914	0.05644	0.05882
546.4	-2.26178	1.65164	-1.8949	1.90509	546.4	0.06712	0.05928	0.05658	0.05899
546.3	-2.37356	1.46264	-1.90803	1.96487	546.3	0.06728	0.05939	0.05669	0.05911
546.2	-2.3669	1.18195	-1.59068	2.31097	546.2	0.06743	0.05953	0.05678	0.05921
546.1	-2.34265	1.32474	-0.75912	1.76576	546.1	0.06762	0.05969	0.05688	0.05932
546	-2.22572	1.68956	-0.4589	2.26821	546	0.06779	0.05983	0.05698	0.05941
545.9	-2.02142	1.88421	-0.53088	1.39818	545.9	0.0679	0.05991	0.05712	0.05953
545.8	-1.82346	1.96287	-0.38504	1.63974	545.8	0.06806	0.06005	0.05729	0.05968
545.7	-1.80195	1.6348	-0.7815	1.83893	545.7	0.0682	0.06022	0.05741	0.05988
545.6	-1.87303	1.44445	-0.88684	1.57026	545.6	0.06834	0.06032	0.05757	0.06006
545.5	-1.807	1.53624	-1.66573	1.43963	545.5	0.06846	0.06043	0.05775	0.0602
545.4	-1.68692	1.71743	-1.8092	1.70389	545.4	0.06856	0.06051	0.05799	0.06033
545.3	-1.40333	2.00194	-1.39096	1.72382	545.3	0.0687	0.06062	0.0582	0.06046
545.2	-0.21994	2.32631	-1.51109	1.64492	545.2	0.06888	0.06077	0.05836	0.06065
545.1	-0.27571	2.03029	-1.74936	1.55909	545.1	0.06903	0.0609	0.0585	0.06079
545	-0.27384	1.78788	-1.7068	1.73165	545	0.06925	0.06103	0.05863	0.06097
544.9	-0.26355	1.52577	-1.49499	1.69185	544.9	0.06947	0.06119	0.05877	0.0611
544.8	-0.03486	1.5461	-1.49308	1.39251	544.8	0.06968	0.06135	0.05887	0.06127
544.7	-0.71693	2.82633	-1.88982	1.37476	544.7	0.06996	0.06154	0.05899	0.0614
544.6	-1.05407	2.99397	-2.13747	1.51379	544.6	0.07014	0.06173	0.0591	0.06154
544.5	-0.73307	2.90137	-1.58781	1.88546	544.5	0.07031	0.06187	0.05926	0.06167
544.4	-0.59726	3.26306	-1.3817	1.85177	544.4	0.07049	0.06203	0.05938	0.06181
544.3	-0.5839	3.40049	-1.13268	1.60897	544.3	0.07067	0.06215	0.05955	0.06195
544.2	-0.19062	2.85891	-0.82756	1.92575	544.2	0.07083	0.06229	0.05976	0.06213
544.1	0.05295	2.70504	-1.15277	1.62313	544.1	0.07099	0.06245	0.05994	0.06232
544	0.32752	2.60102	-1.25292	2.26075	544	0.07122	0.06259	0.0601	0.06248
543.9	0.22931	2.33739	-1.83578	2.43528	543.9	0.07143	0.06273	0.0603	0.06264
543.8	0.4784	2.48727	-1.63075	2.13307	543.8	0.0716	0.0628	0.06045	0.06279
543.7	0.38123	2.02674	-0.99161	0.96591	543.7	0.07179	0.06293	0.06057	0.06297
543.6	0.86438	2.06775	-0.94737	0.08989	543.6	0.07197	0.06309	0.06078	0.06312
543.5	0.79638	2.18732	-0.69643	-0.29916	543.5	0.07217	0.06323	0.06093	0.06331
543.4	0.73114	1.52244	-0.38657	-0.12712	543.4	0.0723	0.06339	0.0611	0.06347
543.3	0.88692	1.42151	-0.48069	0.38226	543.3	0.07245	0.06353	0.06126	0.0636
543.2	1.26584	1.70523	-0.6645	0.18139	543.2	0.07263	0.06367	0.06138	0.06373
543.1	0.92317	1.93863	-0.71958	0.19341	543.1	0.07285	0.06385	0.06151	0.06387
543	0.84289	1.09036	-0.4175	0.13063	543	0.07304	0.06402	0.06164	0.06404
542.9	0.99284	0.79705	-0.22572	-0.05461	542.9	0.07322	0.06419	0.06179	0.06422
542.8	1.40172	1.1286	-0.40593	0.35677	542.8	0.0734	0.06438	0.06197	0.06443
542.7	1.6423	0.71341	-0.60451	0.37153	542.7	0.07357	0.06448	0.06219	0.06463
542.6	2.00477	0.32927	-0.7559	1.0261	542.6	0.07378	0.06464	0.06236	0.06481
542.5	2.71403	0.69359	-1.08193	1.10341	542.5	0.07388	0.06475	0.06248	0.06491
542.4	3.22565	0.93606	-0.44131	0.84307	542.4	0.07404	0.06487	0.06269	0.06504
542.3	3.09465	0.97913	-0.24399	0.80066	542.3	0.07421	0.065	0.06289	0.06519
542.2	3.02841	1.35402	0.32562	0.226	542.2	0.07445	0.06516	0.06307	0.06533
542.1	2.42465	1.22005	0.03014	0.01504	542.1	0.07467	0.06537	0.06322	0.06553
542	2.49233	1.23451	-0.16834	-0.1772	542	0.07489	0.06561	0.06326	0.06575
541.9	1.96502	1.09715	0.37118	0.19766	541.9	0.07506	0.0658	0.06336	0.06594
541.8	1.77201	1.65755	0.64496	0.33556	541.8	0.07527	0.06598	0.06351	0.06612
541.7	1.81406	1.88126	0.56037	-0.21578	541.7	0.07541	0.06614	0.06367	0.06629
541.6	2.14869	2.26512	0.63071	-0.2453	541.6	0.07556	0.06635	0.06384	0.06643
541.5	1.60856	2.21271	0.20642	-0.25803	541.5	0.07569	0.06655	0.06401	0.06656
541.4	1.88884	1.34566	0.29831	-0.08291	541.4	0.07582	0.06673	0.0642	0.06677
541.3	1.60447	1.16047	0.56078	0.17748	541.3	0.07594	0.06689	0.06441	0.0669
541.2	1.74187	1.12884	0.10396	-0.1817	541.2	0.07607	0.067	0.06459	0.06707
541.1	2.24097	0.8172	-0.00319	0.12366	541.1	0.0762	0.06712	0.06479	0.06729
541	2.78723	0.54112	-0.22941	0.1499	541	0.07633	0.06722	0.065	0.06748
540.9	3.25308	0.88762	-0.31012	-0.25595	540.9	0.07649	0.06734	0.06515	0.06767
540.8	3.52468	0.81314	-0.18252	-0.30971	540.8	0.07663	0.06751	0.06528	0.06786
540.7	3.73449	1.32104	0.66729	-0.39921	540.7	0.07679	0.06766	0.06547	0.06801
540.6	3.844	1.42512	0.14791	-0.66261	540.6	0.07691	0.06775	0.06557	0.06813
540.5	3.67516	0.93657	0.47901	-0.52799	540.5	0.07709	0.0679	0.06572	0.06832
540.4	4.05613	1.41916	0.40143	0.01698	540.4	0.07722	0.06811	0.06587	0.06846
540.3	3.72412	1.973	0.29926	0.6024	540.3	0.07736	0.06826	0.06599	0.06859
540.2	3.45051	2.13292	0.73275	0.90049	540.2	0.07754	0.06844	0.06613	0.06873
540.1	3.03202	2.28946	0.48154	0.67517	540.1	0.07776	0.06864	0.06629	0.06882
540	2.6931	3.03087	0.23437	0.84792	540	0.07796	0.06878	0.06645	0.06897
539.9	2.57054	2.83749	-0.02754	0.52752	539.9	0.07815	0.069	0.06663	0.06915
539.8	2.84916	3.0698	-0.20851	0.59118	539.8	0.07832	0.06916	0.0668	0.06931
539.7	2.73124	3.37264	-0.89652	1.03891	539.7	0.07848	0.06931	0.06693	0.06955
539.6	3.53848	3.35299	-0.88053	0.84869	539.6	0.07867	0.06945	0.06711	0.06973
539.5	3.02884	3.41135	-1.25168	1.1627	539.5	0.07881	0.06959	0.0673	0.06989
539.4	3.24886	2.8039	-1.9903	1.06216	539.4	0.07896	0.06974	0.06747	0.07001
539.3	3.23614	2.84967	-1.54736	1.21068	539.3	0.0791	0.06995	0.06763	0.07016
539.2	2.67499	3.01028	-1.67103	0.37419	539.2	0.07932	0.07016	0.06779	0.07032
539.1	2.73902	2.62668	-1.53416	0.60254	539.1	0.07951	0.07035	0.06795	0.07045
539	1.85164	3.0423	-1.56313	0.91595	539	0.07967	0.07054	0.06805	0.07055
538.9	1.82337	3.08861	-1.31539	0.69843	538.9	0.07989	0.07072	0.06817	0.07071
538.8	1.76491	2.90841	-1.26904	0.87944	538.8	0.08009	0.0709	0.06831	0.07093
538.7	1.88618	2.95678	-1.25351	1.1092	538.7	0.08031	0.07106	0.06842	0.07109
538.6	2.16149	3.38032	-1.0558	0.47351	538.6	0.08048	0.07119	0.06866	0.07125
538.5	1.62109	3.33126	-1.27019	-0.34714	538.5	0.08068	0.07135	0.0688	0.07144
538.4	2.44543	3.08273	-1.63498	0.13426	538.4	0.08083	0.07154	0.06892	0.07156
538.3	2.38958	2.82431	-1.64054	0.51708	538.3	0.08102	0.0717	0.06907	0.07172
538.2	2.41787	2.47999	-1.3606	0.86756	538.2	0.08124	0.07183	0.06925	0.07189
538.1	2.57179	3.24148	-1.40388	1.18253	538.1	0.08145	0.07201	0.06945	0.07206
538	1.86368	3.17606	-1.56546	1.20018	538	0.08165	0.0722	0.06962	0.07223
537.9	2.25036	3.18747	-1.13691	1.54467	537.9	0.0819	0.0724	0.06977	0.07239
537.8	2.23559	3.20678	-1.22356	1.7484	537.8	0.08214	0.0726	0.06993	0.07258
537.7	1.76769	3.53278	-1.82896	1.65246	537.7	0.08241	0.07281	0.07007	0.07276
537.6	1.21779	3.21333	-1.42266	1.34426	537.6	0.08267	0.07305	0.0702	0.07297
537.5	0.48046	3.24613	-1.80143	1.72882	537.5	0.08293	0.07324	0.07034	0.07319
537.4	0.68145	3.8902	-2.47702	2.09356	537.4	0.08317	0.07342	0.07049	0.07341
537.3	1.20269	3.82072	-2.74453	2.4684	537.3	0.08335	0.07361	0.07064	0.07362
537.2	1.46315	4.89089	-2.48686	2.22776	537.2	0.08356	0.07388	0.0708	0.07384
537.1	1.3915	5.07875	-3.08822	2.10033	537.1	0.08371	0.07405	0.07101	0.07401
537	1.0605	4.38121	-2.87543	1.73751	537	0.08387	0.07423	0.07124	0.0742
536.9	1.69688	3.7286	-3.20572	2.18837	536.9	0.08406	0.07439	0.07147	0.07439
536.8	1.93712	3.044	-4.1014	2.29964	536.8	0.08421	0.07456	0.07167	0.07458
536.7	2.23475	2.78636	-3.68932	2.43439	536.7	0.08445	0.07472	0.07185	0.07482
536.6	2.70961	2.6472	-2.93863	2.05446	536.6	0.08464	0.07488	0.07203	0.07495
536.5	2.83894	2.76108	-3.40791	2.674	536.5	0.08484	0.07503	0.07221	0.07515
536.4	2.38784	3.09469	-2.67917	2.36365	536.4	0.08506	0.0752	0.07236	0.0753
536.3	2.90508	3.14115	-2.45089	2.32935	536.3	0.08524	0.07542	0.07255	0.07547
536.2	2.5955	3.11315	-1.9641	2.32199	536.2	0.08539	0.07559	0.07272	0.07563
536.1	3.15947	3.33206	-1.76075	2.62872	536.1	0.08561	0.07575	0.07285	0.07579
536	2.91711	4.03133	-1.00351	2.48034	536	0.08582	0.07591	0.07301	0.07601
535.9	2.87038	3.68956	-1.08622	2.36738	535.9	0.08603	0.07609	0.07315	0.07622
535.8	2.39465	3.52688	-0.88454	2.75775	535.8	0.0862	0.07628	0.07329	0.07643
535.7	2.63323	3.18099	-1.08867	2.73185	535.7	0.08638	0.07646	0.07345	0.07668
535.6	2.90132	2.84025	-1.20251	2.66523	535.6	0.08653	0.0766	0.07363	0.07688
535.5	3.35816	2.63866	-1.2139	3.81547	535.5	0.08672	0.07672	0.07384	0.07708
535.4	3.03767	2.66812	-1.30545	3.35652	535.4	0.08691	0.07691	0.07412	0.07727
535.3	2.79791	2.14919	-1.35218	3.44698	535.3	0.08715	0.07709	0.07434	0.07747
535.2	2.96618	2.29709	-1.14237	4.3359	535.2	0.08738	0.07732	0.07452	0.07763
535.1	2.56038	1.99655	-0.70563	4.33253	535.1	0.08763	0.07753	0.07472	0.0778
535	2.60568	1.94157	-0.29365	3.78983	535	0.08793	0.07774	0.07493	0.07799
534.9	1.85165	2.2668	-1.3176	4.27609	534.9	0.08813	0.07796	0.07514	0.07818
534.8	2.03113	1.78495	-0.87377	4.29927	534.8	0.08836	0.07817	0.07531	0.07838
534.7	2.32245	1.82169	-0.84177	4.58813	534.7	0.08856	0.07838	0.07549	0.07853
534.6	2.21379	1.81451	-0.94673	4.43149	534.6	0.08871	0.0786	0.07562	0.07874
534.5	2.21004	2.09843	-0.32889	3.79261	534.5	0.08889	0.07878	0.07582	0.07893
534.4	1.78744	1.88365	0.02122	4.07577	534.4	0.08909	0.07903	0.07605	0.07913
534.3	1.65348	1.98418	0.21722	4.47601	534.3	0.08919	0.07921	0.07627	0.07929
534.2	1.57325	2.00381	0.47433	4.18189	534.2	0.08935	0.07941	0.07646	0.07946
534.1	1.77396	1.07872	0.68897	4.01874	534.1	0.0895	0.0796	0.07663	0.07964
534	0.78019	0.86705	1.32143	4.56927	534	0.08974	0.0798	0.07677	0.07981
533.9	0.83623	0.02185	1.44325	4.73692	533.9	0.08996	0.07998	0.07693	0.08
533.8	0.75601	-0.1379	2.00469	4.56494	533.8	0.09025	0.08019	0.07709	0.08019
533.7	1.78866	-0.27574	1.79231	4.54525	533.7	0.0905	0.08041	0.07724	0.08041
533.6	1.76066	-0.24804	1.33484	4.16375	533.6	0.09072	0.08063	0.07742	0.08063
533.5	1.40795	0.66897	1.66586	4.37799	533.5	0.09097	0.08082	0.07758	0.08085
533.4	1.52036	1.85643	1.21043	4.00158	533.4	0.09114	0.08097	0.07778	0.08106
533.3	1.54646	1.63595	0.64831	4.12369	533.3	0.09133	0.08114	0.07801	0.08127
533.2	0.97045	1.33413	1.45954	4.19089	533.2	0.09152	0.08138	0.07823	0.0815
533.1	1.46694	1.41721	1.1887	4.4753	533.1	0.09169	0.08155	0.07844	0.08164
533	1.29956	1.57625	1.08423	4.91871	533	0.0919	0.08174	0.07861	0.08182
532.9	1.17654	1.28822	0.06873	4.90725	532.9	0.09211	0.08197	0.07879	0.08204
532.8	0.90779	0.81368	-0.68791	4.18576	532.8	0.09236	0.08222	0.07894	0.08226
532.7	1.44293	0.656	-1.08617	4.01639	532.7	0.09261	0.08243	0.0791	0.08246
532.6	0.83204	0.99118	-0.85141	4.38226	532.6	0.09288	0.08262	0.07928	0.08261
532.5	1.59921	0.91556	-1.12778	4.37421	532.5	0.09313	0.08285	0.07947	0.0828
532.4	1.51072	1.40204	-1.14237	4.61491	532.4	0.09336	0.08305	0.07967	0.08298
532.3	1.52328	1.88673	-1.50779	4.55522	532.3	0.09368	0.08335	0.07996	0.0832
532.2	1.81053	2.22704	-1.64416	4.42006	532.2	0.09388	0.08356	0.08014	0.08342
532.1	0.85674	2.02129	-0.83592	4.65447	532.1	0.09405	0.08378	0.08032	0.08369
532	1.94484	2.79447	-0.71541	4.03491	532	0.09421	0.08396	0.08049	0.08395
531.9	2.38926	2.46849	-1.71043	4.01157	531.9	0.09437	0.08409	0.08072	0.08417
531.8	2.18036	2.1813	-1.59667	3.52315	531.8	0.09452	0.08423	0.08091	0.08437
531.7	2.2084	1.98372	-1.36792	3.99515	531.7	0.0947	0.08439	0.08111	0.08455
531.6	1.95271	2.09818	-1.7389	3.6834	531.6	0.09486	0.08456	0.08128	0.08479
531.5	1.34459	1.38529	-2.05145	3.56664	531.5	0.09513	0.08476	0.08157	0.085
531.4	1.95844	1.28645	-1.9294	3.46028	531.4	0.0954	0.08495	0.08183	0.08517
531.3	2.29274	1.5063	-1.91537	3.69569	531.3	0.0957	0.08515	0.0821	0.08537
531.2	2.35601	1.45463	-2.21134	2.14297	531.2	0.09598	0.08536	0.08235	0.08558
531.1	2.82402	1.54692	-2.84968	1.70333	531.1	0.09626	0.08558	0.08257	0.08585
531	2.8429	2.02493	-2.51366	1.68064	531	0.09653	0.08578	0.08279	0.08607
530.9	2.64415	1.96833	-3.44358	1.68142	530.9	0.09675	0.08598	0.08299	0.08632
530.8	2.28273	1.86338	-3.85872	1.88998	530.8	0.09693	0.08613	0.08321	0.08661
530.7	2.14595	2.09329	-3.84004	1.95028	530.7	0.09713	0.08631	0.08343	0.08686
530.6	1.12849	2.25462	-3.82046	2.37848	530.6	0.09735	0.08653	0.08368	0.08713
530.5	1.37411	2.50784	-3.82387	1.96843	530.5	0.09759	0.08675	0.08388	0.08734
530.4	1.15278	2.69447	-3.56469	1.80867	530.4	0.09781	0.08695	0.0841	0.08751
530.3	0.41968	2.41131	-3.71427	1.16149	530.3	0.09808	0.08718	0.08426	0.08771
530.2	0.18902	1.73356	-3.37027	1.41515	530.2	0.09838	0.08748	0.08446	0.08786
530.1	-1.13707	2.29869	-3.12684	1.90418	530.1	0.09868	0.08772	0.08465	0.08804
530	-1.18362	2.02439	-3.01606	1.44499	530	0.09902	0.08797	0.08486	0.08822
529.9	-1.13505	1.57508	-3.55379	1.14201	529.9	0.09932	0.08822	0.0851	0.08847
529.8	-0.95583	1.18965	-3.68261	0.8067	529.8	0.09963	0.08847	0.08549	0.08872
529.7	-0.63712	1.46454	-3.43558	1.10361	529.7	0.09982	0.08865	0.08572	0.08897
529.6	-0.40988	1.14518	-3.85517	0.69307	529.6	0.09999	0.08884	0.08604	0.08919
529.5	-0.81949	0.94461	-2.93413	0.71835	529.5	0.10017	0.08899	0.08626	0.08941
529.4	-0.90545	0.83827	-2.74571	0.30814	529.4	0.10034	0.08921	0.08649	0.08967
529.3	-1.63754	0.16936	-3.19902	0.13269	529.3	0.10056	0.08937	0.08667	0.08992
529.2	-1.91598	0.4953	-3.14521	0.152	529.2	0.10074	0.08954	0.08686	0.0902
529.1	-1.62241	0.46204	-2.48024	-0.24079	529.1	0.10095	0.0897	0.08702	0.09042
529	-2.35333	0.41416	-2.64241	0.04059	529	0.10119	0.08987	0.08724	0.09059
528.9	-2.15907	0.4982	-2.41215	-0.26568	528.9	0.10145	0.09007	0.08743	0.09076
528.8	-1.93799	-0.51918	-3.21537	0.40593	528.8	0.10186	0.09034	0.08768	0.09091
528.7	-1.86326	-0.56042	-3.03126	0.60069	528.7	0.10216	0.09061	0.08793	0.09106
528.6	-2.2842	-0.52528	-3.19565	0.86967	528.6	0.10245	0.09087	0.08814	0.09124
528.5	-1.53609	-1.02283	-3.2344	0.57393	528.5	0.10271	0.0911	0.08837	0.09148
528.4	-1.37675	-0.29596	-2.41356	0.51662	528.4	0.10296	0.09127	0.08862	0.09171
528.3	-0.32266	-0.05089	-1.98712	0.70021	528.3	0.10314	0.09145	0.08882	0.09197
528.2	-0.80094	0.38442	-1.94462	1.08999	528.2	0.10332	0.09157	0.08902	0.09224
528.1	-1.07314	0.36002	-2.26846	1.05721	528.1	0.1035	0.09174	0.0892	0.09251
528	-1.36604	-0.58795	-2.48132	1.87717	528	0.10364	0.0919	0.08934	0.09273
527.9	-1.02291	-0.24961	-2.79977	1.95849	527.9	0.10388	0.09211	0.08947	0.09295
527.8	-1.73303	-0.30852	-3.10847	2.02808	527.8	0.1042	0.09245	0.08965	0.09317
527.7	-1.65016	-0.46998	-2.83025	2.23756	527.7	0.10446	0.09267	0.08988	0.0933
527.6	-1.68613	-0.2257	-2.14079	2.70063	527.6	0.10475	0.09292	0.09013	0.09343
527.5	-1.1177	0.2987	-2.91063	1.39268	527.5	0.10501	0.09315	0.09041	0.09353
527.4	-1.22081	0.24094	-3.30423	1.17779	527.4	0.10527	0.09338	0.09071	0.09369
527.3	-0.93608	0.2599	-3.8429	0.82721	527.3	0.10552	0.0936	0.09101	0.0939
527.2	-1.00822	-0.08936	-2.99005	0.94062	527.2	0.10577	0.09376	0.09127	0.09417
527.1	-0.91524	-0.12011	-3.17982	1.48707	527.1	0.10599	0.09395	0.09154	0.09439
527	-0.39661	0.01026	-3.35432	2.36216	527	0.10617	0.09409	0.09181	0.09466
526.9	-0.0238	0.000829067	-3.65889	2.50203	526.9	0.1064	0.09432	0.09204	0.09489
526.8	1.21975	-0.24944	-3.54537	2.6535	526.8	0.10657	0.0945	0.0922	0.09514
526.7	1.89339	-0.23734	-3.75233	2.7464	526.7	0.10682	0.0947	0.09234	0.09534
526.6	1.82765	-0.06813	-3.02914	2.50288	526.6	0.10705	0.09496	0.09253	0.09556
526.5	1.19232	0.55746	-2.92531	2.32744	526.5	0.10739	0.0953	0.09268	0.09581
526.4	1.77884	0.55832	-2.79603	2.28635	526.4	0.10765	0.09558	0.09284	0.09602
526.3	1.76534	1.31952	-2.55017	2.28672	526.3	0.10791	0.09588	0.09306	0.09625
526.2	2.14695	1.27624	-2.52883	2.2786	526.2	0.10819	0.09616	0.09336	0.09646
526.1	2.93132	1.94136	-2.18632	2.26356	526.1	0.10844	0.09643	0.09364	0.09664
526	3.05664	2.57253	-1.60466	2.23092	526	0.10871	0.09668	0.09393	0.09683
525.9	3.54843	2.43451	-1.27308	2.02353	525.9	0.10897	0.09699	0.09417	0.09705
525.8	3.00233	2.14173	-0.8347	2.31834	525.8	0.10918	0.09728	0.09443	0.09733
525.7	2.24116	2.56979	-0.96614	2.80773	525.7	0.10944	0.09759	0.0946	0.0976
525.6	2.16848	3.75569	-1.37044	2.15043	525.6	0.10964	0.09784	0.09482	0.09787
525.5	2.19948	3.49805	-0.2652	2.06947	525.5	0.10984	0.09812	0.09497	0.09815
525.4	1.67337	3.89526	-0.09014	2.12543	525.4	0.11011	0.09837	0.09516	0.09842
525.3	2.10516	4.95751	-0.09448	2.47581	525.3	0.11036	0.09861	0.09533	0.0987
525.2	1.96605	5.37342	-0.04368	2.84599	525.2	0.11062	0.09893	0.09554	0.09896
525.1	2.09928	5.39314	-1.12449	2.50156	525.1	0.11088	0.09922	0.09574	0.09922
525	1.4954	5.83731	-0.56813	2.19447	525	0.11116	0.0995	0.09599	0.09945
524.9	2.52035	5.22007	0.34879	1.5367	524.9	0.11142	0.09977	0.09625	0.09967
524.8	2.31486	5.86525	0.42702	1.36662	524.8	0.11165	0.10001	0.09659	0.09993
524.7	2.1576	5.84781	0.91191	1.74131	524.7	0.11191	0.10024	0.0969	0.10024
524.6	1.48998	5.35462	1.66384	2.47479	524.6	0.11209	0.10049	0.09724	0.1005
524.5	1.50725	5.61746	1.14534	2.42247	524.5	0.11226	0.1007	0.09754	0.10077
524.4	1.74871	5.84778	0.55958	2.23374	524.4	0.11248	0.101	0.09788	0.10114
524.3	1.84825	6.6197	0.54698	1.49379	524.3	0.11268	0.10121	0.09811	0.10144
524.2	2.21735	5.49103	0.56471	2.74027	524.2	0.11295	0.10139	0.09828	0.10173
524.1	3.54868	5.42047	0.4761	2.79232	524.1	0.11325	0.10156	0.09843	0.10202
524	3.41451	5.61799	0.72339	2.67226	524	0.11354	0.10176	0.0986	0.10228
523.9	3.12809	6.60593	0.39004	2.99427	523.9	0.11384	0.10199	0.09883	0.10249
523.8	2.38995	6.7546	0.87952	2.59089	523.8	0.11414	0.10226	0.099	0.10275
523.7	2.39649	6.61836	1.56747	1.65407	523.7	0.11444	0.10254	0.09926	0.10294
523.6	2.83566	6.14702	1.89915	2.23208	523.6	0.11471	0.1028	0.09948	0.10321
523.5	2.45677	6.0008	1.57924	1.34393	523.5	0.11496	0.10311	0.09976	0.10346
523.4	2.34577	6.56493	1.68978	1.50886	523.4	0.11512	0.1034	0.10005	0.10375
523.3	2.47094	5.57804	0.86495	1.92505	523.3	0.11533	0.1036	0.10027	0.10404
523.2	2.5854	5.54316	0.94236	2.48698	523.2	0.11555	0.10383	0.10056	0.10434
523.1	2.03895	6.24445	0.6986	3.09863	523.1	0.11578	0.10405	0.10084	0.10458
523	1.90419	6.17888	1.03406	2.5387	523	0.116	0.10425	0.10116	0.10481
522.9	1.23773	6.38794	0.92271	3.34107	522.9	0.11628	0.10449	0.10145	0.10507
522.8	1.31179	6.02976	0.44751	3.1617	522.8	0.11657	0.10468	0.10169	0.10536
522.7	1.21609	5.7145	-0.58365	3.13432	522.7	0.11687	0.10492	0.10192	0.10562
522.6	1.27047	5.79092	-0.53399	3.24327	522.6	0.11716	0.10516	0.10221	0.10587
522.5	1.59608	5.62278	-0.501	2.79507	522.5	0.11751	0.10546	0.10244	0.10609
522.4	2.91958	5.5281	-0.49516	2.42975	522.4	0.11782	0.10571	0.10271	0.10629
522.3	2.24838	5.73525	-0.9909	2.7293	522.3	0.11813	0.10596	0.10298	0.10652
522.2	2.3305	5.58819	-1.82151	2.38442	522.2	0.11844	0.10618	0.10324	0.10678
522.1	2.67984	5.48534	-1.73869	2.61273	522.1	0.1187	0.10641	0.10354	0.107
522	3.19476	4.86864	-1.97599	2.61975	522	0.11896	0.1066	0.10385	0.10722
521.9	3.37119	3.96117	-2.1962	2.14306	521.9	0.11917	0.1068	0.10417	0.10743
521.8	2.20784	4.26553	-2.23552	3.05737	521.8	0.11947	0.10703	0.10447	0.10765
521.7	2.02436	4.38971	-3.00868	2.68414	521.7	0.11976	0.10726	0.10474	0.10788
521.6	1.82942	5.01777	-3.42408	2.56293	521.6	0.12007	0.10753	0.10502	0.10814
521.5	1.76214	4.19913	-4.02676	3.11709	521.5	0.12042	0.10772	0.10523	0.1084
521.4	1.70768	4.0873	-4.25576	2.62901	521.4	0.12073	0.10794	0.10549	0.10866
521.3	1.97935	4.628	-4.05743	2.16657	521.3	0.12108	0.10812	0.1057	0.10891
521.2	1.4898	4.52416	-3.40626	2.36383	521.2	0.12139	0.10832	0.10592	0.10917
521.1	1.06076	4.7252	-2.97809	2.27565	521.1	0.12174	0.10856	0.10612	0.10943
521	0.97508	3.3859	-2.68444	3.34712	521	0.12207	0.10891	0.10638	0.1097
520.9	0.47659	3.7304	-2.12051	3.31899	520.9	0.12231	0.10929	0.10667	0.10993
520.8	-0.27394	3.79277	-1.3946	2.5705	520.8	0.12249	0.10965	0.10698	0.11019
520.7	-0.41549	3.05925	-1.08646	2.72478	520.7	0.12267	0.10995	0.10722	0.11042
520.6	0.09265	3.08061	-1.24385	3.27364	520.6	0.12287	0.11026	0.10749	0.11067
520.5	-0.19752	2.57339	-1.72958	3.38528	520.5	0.12311	0.11054	0.10777	0.11095
520.4	-0.91505	2.58452	-1.9695	3.55723	520.4	0.12338	0.11079	0.10798	0.11121
520.3	-2.1332	3.24837	-2.34024	2.61922	520.3	0.12367	0.11101	0.1082	0.11153
520.2	-2.32536	3.22419	-1.67701	2.69782	520.2	0.12396	0.11123	0.10851	0.1118
520.1	-2.26524	2.55744	-1.30589	2.84669	520.1	0.12429	0.11147	0.10876	0.11207
520	-2.20452	2.66434	-0.54026	2.59692	520	0.12465	0.1117	0.10904	0.11235
519.9	-2.12662	2.4001	-0.28071	1.97545	519.9	0.12497	0.11198	0.10936	0.11257
519.8	-1.99033	3.52709	0.58756	2.08473	519.8	0.12531	0.11227	0.1097	0.11289
519.7	-1.2642	4.02792	0.07032	2.43723	519.7	0.12567	0.11255	0.11001	0.11321
519.6	-0.50603	4.32834	0.30828	2.13494	519.6	0.12593	0.11286	0.11028	0.11347
519.5	-0.18341	4.23359	-0.02209	1.82775	519.5	0.12622	0.11316	0.11054	0.11372
519.4	0.64245	4.00413	0.39709	2.3884	519.4	0.12648	0.11346	0.1108	0.114
519.3	-0.1325	3.66282	0.31606	2.86664	519.3	0.12679	0.11375	0.11102	0.11424
519.2	-0.55294	3.19198	0.53631	3.71752	519.2	0.12707	0.11398	0.11125	0.11455
519.1	-0.62675	2.97823	0.63008	3.9163	519.1	0.12738	0.1142	0.11149	0.11485
519	-0.89626	2.35543	0.76005	3.13457	519	0.12768	0.11451	0.11175	0.11517
518.9	-1.30752	3.02891	1.4403	3.69041	518.9	0.128	0.11479	0.11204	0.11543
518.8	-1.89229	2.74732	1.35097	3.60605	518.8	0.12833	0.11504	0.11233	0.11565
518.7	-2.64238	3.24179	1.47087	3.58289	518.7	0.12866	0.1154	0.11254	0.11591
518.6	-3.53767	4.67512	1.66486	4.07312	518.6	0.12895	0.11571	0.11279	0.11615
518.5	-3.76831	3.95944	2.07547	3.33965	518.5	0.12923	0.11608	0.11299	0.11643
518.4	-3.42238	3.67505	1.70135	3.33386	518.4	0.12948	0.11645	0.11318	0.11674
518.3	-2.8201	3.03882	2.02706	3.44335	518.3	0.1297	0.11687	0.11337	0.11701
518.2	-2.8425	2.85862	1.53279	3.14961	518.2	0.12994	0.11727	0.11355	0.11724
518.1	-2.44989	3.17871	1.86138	3.53231	518.1	0.13016	0.11766	0.11379	0.11747
518	-1.76684	3.0714	1.51894	3.65368	518	0.13043	0.11803	0.11405	0.11775
517.9	-1.49044	2.55322	1.76265	3.87925	517.9	0.13071	0.11831	0.11436	0.11803
517.8	-1.29942	3.13089	1.8739	4.54053	517.8	0.13103	0.11862	0.1147	0.11831
517.7	-1.33309	3.8498	1.6394	4.42633	517.7	0.13133	0.11891	0.11499	0.11864
517.6	-1.46514	3.373	1.67593	4.36507	517.6	0.1317	0.11917	0.11525	0.11897
517.5	-1.27502	3.73783	1.45107	4.70002	517.5	0.13209	0.11945	0.11553	0.11927
517.4	-1.25684	3.87375	1.53611	4.70323	517.4	0.13252	0.11975	0.11576	0.11962
517.3	-0.30952	4.01358	1.28882	5.95871	517.3	0.13288	0.12011	0.11599	0.11996
517.2	0.31499	4.8913	1.27302	6.01137	517.2	0.13318	0.12045	0.11624	0.12028
517.1	0.3143	5.19985	1.81174	5.68461	517.1	0.13344	0.12078	0.11654	0.12057
517	0.6154	4.90894	2.04897	6.51037	517	0.13365	0.12112	0.11686	0.12081
516.9	0.82424	4.75074	1.28826	6.89303	516.9	0.13389	0.12142	0.11716	0.12106
516.8	0.55975	5.20438	0.97164	6.4911	516.8	0.13409	0.12171	0.11748	0.1213
516.7	0.62624	5.86524	0.01423	7.1922	516.7	0.13435	0.12203	0.11778	0.12157
516.6	0.44843	6.19201	-0.00202	7.52075	516.6	0.13469	0.12233	0.11803	0.12188
516.5	-0.17761	4.76109	-0.4557	7.12683	516.5	0.13496	0.12262	0.11829	0.12221
516.4	-0.14906	4.20066	-1.18443	7.71397	516.4	0.13533	0.12291	0.11847	0.1225
516.3	-0.28559	3.52034	-1.88625	8.15314	516.3	0.13572	0.12314	0.11869	0.1228
516.2	-1.04632	2.62876	-2.24734	8.31073	516.2	0.1361	0.12341	0.11894	0.12313
516.1	-1.46423	2.93931	-1.8744	8.76826	516.1	0.13646	0.12364	0.11923	0.1234
516	-0.96423	3.91473	-1.8846	8.38374	516	0.13678	0.12392	0.1195	0.12373
515.9	-0.55745	3.83631	-1.76238	8.32935	515.9	0.13706	0.12423	0.11978	0.12399
515.8	-1.18966	4.27333	-1.64022	7.99049	515.8	0.13734	0.12457	0.1201	0.12421
515.7	-0.26724	3.94758	-1.86056	8.11972	515.7	0.13758	0.12493	0.12044	0.12445
515.6	0.48691	3.40448	-1.63789	8.10733	515.6	0.13781	0.12523	0.12072	0.1247
515.5	0.96802	3.55911	-1.94718	7.77808	515.5	0.13808	0.12553	0.12103	0.12504
515.4	1.21912	3.6677	-2.65746	7.11776	515.4	0.13833	0.12577	0.12135	0.12544
515.3	1.6013	3.13698	-2.91626	6.88037	515.3	0.13859	0.12599	0.12165	0.12588
515.2	1.56897	3.5948	-3.29825	7.65459	515.2	0.13885	0.12618	0.12198	0.12632
515.1	0.81862	3.57269	-3.54354	7.43233	515.1	0.13915	0.12641	0.12233	0.12669
515	0.95442	3.9546	-3.65021	7.35514	515	0.1395	0.12656	0.1226	0.12704
514.9	0.66993	4.46932	-3.44579	7.11039	514.9	0.13986	0.1268	0.12293	0.1274
514.8	0.41654	4.5002	-3.67282	6.91087	514.8	0.14025	0.12705	0.12321	0.12771
514.7	1.02975	4.62527	-3.37947	6.41522	514.7	0.14065	0.12736	0.12344	0.12799
514.6	0.99755	4.06325	-3.55412	6.35073	514.6	0.14108	0.12771	0.12371	0.12826
514.5	1.62164	3.93924	-4.65174	5.94463	514.5	0.14144	0.12806	0.12402	0.12853
514.4	1.82924	4.76835	-4.42715	5.44189	514.4	0.14178	0.12833	0.12433	0.12878
514.3	1.98946	5.19677	-4.17806	5.42193	514.3	0.1421	0.12862	0.12466	0.12903
514.2	2.65587	4.9418	-3.94885	5.30091	514.2	0.14244	0.12884	0.125	0.12929
514.1	1.758	4.33071	-3.84688	5.19668	514.1	0.14271	0.12912	0.12541	0.12954
514	0.23863	4.61627	-3.80284	3.95987	514	0.14298	0.12939	0.12578	0.12986
513.9	0.34017	4.46159	-3.13515	2.98988	513.9	0.14325	0.12964	0.12615	0.13014
513.8	0.08266	4.03076	-3.59196	3.68851	513.8	0.14355	0.12991	0.12644	0.13047
513.7	-1.13901	3.98704	-4.05421	3.27134	513.7	0.14392	0.13017	0.1267	0.13078
513.6	-0.93383	3.75196	-4.45182	3.45257	513.6	0.14418	0.13043	0.12688	0.13106
513.5	-0.50948	3.80932	-3.89927	3.30913	513.5	0.1446	0.13071	0.12711	0.13147
513.4	-0.95921	4.48027	-3.01091	3.15053	513.4	0.14498	0.13096	0.12732	0.13182
513.3	-1.63782	3.79441	-2.70545	3.49387	513.3	0.14532	0.13118	0.1276	0.13211
513.2	-1.35747	3.41672	-3.56	2.59837	513.2	0.14564	0.13145	0.1279	0.13244
513.1	-1.41972	3.78369	-3.16625	2.92132	513.1	0.14592	0.13171	0.12822	0.13272
513	-0.90402	4.10518	-3.11987	2.29163	513	0.14621	0.13203	0.12855	0.13305
512.9	-1.25627	5.07965	-3.31759	2.0335	512.9	0.14651	0.13237	0.12885	0.13335
512.8	-1.05785	4.88347	-2.96534	1.94389	512.8	0.14679	0.13269	0.12918	0.1337
512.7	-0.47355	4.39183	-3.23555	1.91631	512.7	0.1471	0.13305	0.12951	0.134
512.6	-1.7509	4.25282	-3.42979	2.5979	512.6	0.14747	0.13334	0.12989	0.13432
512.5	-1.19349	4.22861	-3.54754	1.26838	512.5	0.14785	0.13366	0.13025	0.13467
512.4	-1.71237	4.65576	-3.83913	1.84319	512.4	0.14818	0.13395	0.13064	0.13498
512.3	-1.69924	5.1519	-3.48138	2.40916	512.3	0.14851	0.13425	0.13093	0.13535
512.2	-1.25786	4.99058	-4.25165	2.13759	512.2	0.14882	0.13448	0.13119	0.13575
512.1	-2.12054	5.26934	-3.69651	2.77348	512.1	0.14914	0.1348	0.13155	0.13609
512	-2.51063	4.5664	-3.93415	2.10952	512	0.14951	0.13516	0.13184	0.13634
511.9	-1.73353	4.64086	-4.14388	2.56973	511.9	0.14994	0.13555	0.13215	0.1366
511.8	-1.50453	4.59947	-3.22447	1.85842	511.8	0.15038	0.13591	0.13244	0.13683
511.7	-1.13848	4.73815	-2.26008	2.59148	511.7	0.1508	0.13623	0.13273	0.13708
511.6	-1.33254	4.27147	-1.94453	2.32778	511.6	0.15121	0.13657	0.13303	0.13739
511.5	-0.64534	3.95045	-1.56564	2.49166	511.5	0.15156	0.13685	0.13331	0.13771
511.4	-0.7623	4.6912	-1.96538	2.08734	511.4	0.15191	0.13713	0.13365	0.138
511.3	-1.1276	5.2944	-2.87418	2.10269	511.3	0.15221	0.1374	0.134	0.13834
511.2	-1.34933	5.28141	-2.35624	2.34049	511.2	0.15247	0.13764	0.13423	0.13868
511.1	-0.97914	4.09747	-2.76836	2.20233	511.1	0.15276	0.1379	0.13442	0.13903
511	-1.88612	3.59759	-2.52385	1.37426	511	0.15301	0.1382	0.13464	0.13943
510.9	-2.2064	3.54587	-3.09444	1.29993	510.9	0.15328	0.13849	0.13479	0.13984
510.8	-1.62516	3.12451	-3.17282	1.66715	510.8	0.15352	0.13881	0.13499	0.14023
510.7	-1.82259	3.1121	-3.58935	1.59677	510.7	0.15382	0.13918	0.13523	0.14058
510.6	-1.4759	2.4554	-4.24342	2.1671	510.6	0.15418	0.13952	0.1355	0.14088
510.5	-0.05654	3.29634	-5.1576	1.24166	510.5	0.15463	0.13994	0.13577	0.1412
510.4	0.13904	2.69918	-3.96376	1.43546	510.4	0.1551	0.14028	0.13609	0.14148
510.3	0.22785	2.97718	-4.30708	1.08034	510.3	0.15552	0.14064	0.13644	0.14179
510.2	1.24786	3.18485	-5.27401	1.66619	510.2	0.15592	0.14105	0.13682	0.14207
510.1	0.95293	2.71453	-5.36377	1.11276	510.1	0.15624	0.14146	0.13724	0.14243
510	1.2523	3.40467	-6.26457	0.71413	510	0.15655	0.1419	0.13768	0.14277
509.9	1.64791	3.1656	-5.73351	0.65755	509.9	0.15688	0.14227	0.13818	0.14309
509.8	1.75304	3.66622	-4.9456	0.94037	509.8	0.15719	0.14265	0.1386	0.14341
509.7	2.22069	4.16932	-4.62463	1.57904	509.7	0.15755	0.14298	0.139	0.14374
509.6	1.66404	4.00266	-2.22585	0.8038	509.6	0.15788	0.14328	0.13934	0.14409
509.5	1.45667	4.18033	-2.33055	0.10694	509.5	0.15822	0.1436	0.13967	0.14443
509.4	1.32452	3.65234	-1.80527	-0.33508	509.4	0.15857	0.14397	0.13991	0.14483
509.3	2.07146	3.62264	-1.93507	0.00262	509.3	0.15891	0.14433	0.1401	0.14526
509.2	1.34587	3.42664	-2.28773	0.33581	509.2	0.15927	0.1447	0.14034	0.14569
509.1	1.58511	3.65057	-3.20875	1.00321	509.1	0.15972	0.14503	0.14051	0.14613
509	1.71565	3.34431	-3.05608	0.501	509	0.16019	0.14537	0.14081	0.14654
508.9	1.07053	3.40551	-2.23767	1.04628	508.9	0.16059	0.14576	0.14111	0.14692
508.8	1.81667	3.04989	-3.05934	1.33424	508.8	0.16105	0.14619	0.14142	0.14717
508.7	2.06847	3.70917	-2.68758	1.33734	508.7	0.16147	0.14666	0.14173	0.14745
508.6	2.41039	4.40685	-2.53896	0.7057	508.6	0.16184	0.14709	0.14213	0.14773
508.5	2.28749	4.07546	-2.63159	1.4625	508.5	0.16213	0.14748	0.14255	0.14801
508.4	2.21899	4.07119	-3.36508	1.32841	508.4	0.16243	0.14785	0.143	0.1483
508.3	2.285	3.88619	-3.78678	2.04609	508.3	0.16266	0.14821	0.14345	0.14863
508.2	2.01177	3.4284	-3.85655	1.93357	508.2	0.1629	0.14857	0.14383	0.14896
508.1	2.57555	3.3615	-3.65209	1.90161	508.1	0.16317	0.14901	0.14421	0.14936
508	2.25024	2.46224	-3.3792	2.11211	508	0.16351	0.14934	0.1445	0.14972
507.9	2.04572	1.78464	-3.5218	1.26629	507.9	0.16386	0.14973	0.14485	0.1501
507.8	1.78258	2.28071	-3.14399	1.71234	507.8	0.16426	0.15011	0.1451	0.15051
507.7	2.81705	3.16761	-4.00711	2.36478	507.7	0.16475	0.15049	0.14538	0.1509
507.6	4.02554	3.41973	-3.87639	2.97104	507.6	0.16517	0.15094	0.14574	0.15122
507.5	4.41462	4.57376	-3.44375	3.4622	507.5	0.1656	0.15134	0.14614	0.15157
507.4	4.97706	4.67138	-3.13817	4.0377	507.4	0.16616	0.15173	0.14666	0.15201
507.3	4.64679	5.05798	-2.18	3.0609	507.3	0.16654	0.15207	0.14706	0.15231
507.2	4.41617	4.97414	-2.11519	4.43682	507.2	0.16689	0.15239	0.14746	0.15256
507.1	4.40847	5.29084	-3.0909	4.24584	507.1	0.16719	0.15279	0.14782	0.15288
507	5.13665	5.46521	-3.62543	4.1956	507	0.16745	0.15314	0.14816	0.15326
506.9	4.28437	5.73492	-3.48188	3.91563	506.9	0.16772	0.15345	0.14852	0.15363
506.8	5.01534	7.12034	-4.17571	4.17838	506.8	0.16805	0.15382	0.1488	0.15401
506.7	4.80338	6.56571	-3.62642	4.97436	506.7	0.16835	0.15416	0.14906	0.15441
506.6	4.65694	7.47272	-3.71931	5.19532	506.6	0.16866	0.15453	0.14923	0.15477
506.5	5.60516	7.56933	-4.31348	3.99913	506.5	0.16898	0.15482	0.14947	0.15515
506.4	5.8683	7.04265	-4.5087	4.42337	506.4	0.16932	0.15518	0.14976	0.15552
506.3	5.681	6.49282	-6.04211	4.53083	506.3	0.16972	0.15555	0.15011	0.15592
506.2	6.76327	6.28595	-6.14589	4.93479	506.2	0.17014	0.15588	0.15049	0.15631
506.1	5.26338	6.64136	-7.10463	5.25831	506.1	0.1706	0.15621	0.15093	0.15669
506	5.97377	7.29618	-7.213	4.69062	506	0.17108	0.15655	0.15135	0.15704
505.9	6.08366	6.93254	-6.60961	3.88483	505.9	0.17155	0.15698	0.15187	0.15741
505.8	5.38342	7.37585	-6.31593	4.27076	505.8	0.17188	0.15736	0.15225	0.15766
505.7	5.75284	6.90442	-5.76559	4.46308	505.7	0.17222	0.1577	0.15258	0.15791
505.6	5.98422	5.96517	-5.61179	3.57881	505.6	0.17258	0.158	0.15285	0.15819
505.5	6.69032	6.67305	-4.44387	3.55082	505.5	0.17282	0.1583	0.15314	0.15845
505.4	6.92479	6.37356	-3.8169	4.50792	505.4	0.17308	0.15857	0.15348	0.15886
505.3	7.97002	6.58364	-5.53027	5.30054	505.3	0.17337	0.15889	0.15377	0.15922
505.2	8.44641	6.92836	-5.57342	4.7683	505.2	0.17371	0.15924	0.15407	0.15961
505.1	9.16764	7.09464	-5.8414	4.99833	505.1	0.17408	0.15958	0.15442	0.16003
505	9.11372	7.59391	-5.39611	4.91322	505	0.17453	0.15993	0.15478	0.16038
504.9	9.12328	9.36878	-5.24705	4.6698	504.9	0.17504	0.1603	0.15518	0.16081
504.8	8.50205	9.25275	-3.87502	5.34035	504.8	0.17558	0.16068	0.15564	0.16121
504.7	8.53695	9.93113	-4.60404	5.78686	504.7	0.17601	0.16108	0.15606	0.16163
504.6	7.84969	10.2914	-5.63224	6.32164	504.6	0.17656	0.16158	0.15668	0.16207
504.5	6.60116	10.514	-4.46369	6.21143	504.5	0.177	0.16194	0.15717	0.16232
504.4	6.76854	10.3165	-4.47608	5.8412	504.4	0.17736	0.16233	0.15761	0.16264
504.3	5.82102	9.81183	-5.5231	5.70469	504.3	0.17777	0.16268	0.15799	0.16293
504.2	5.45095	8.72851	-5.42093	5.31479	504.2	0.17811	0.16305	0.15837	0.16323
504.1	5.70027	9.33332	-5.71948	4.94034	504.1	0.17851	0.16341	0.15866	0.16361
504	5.40639	8.93875	-6.57921	5.42595	504	0.17884	0.1638	0.15906	0.16404
503.9	4.89018	9.08039	-5.55154	4.55527	503.9	0.17926	0.16416	0.15943	0.16453
503.8	4.69016	9.21196	-4.70789	4.19879	503.8	0.17966	0.16445	0.15988	0.16494
503.7	5.44756	8.69257	-4.18939	3.99457	503.7	0.18005	0.16475	0.16026	0.16526
503.6	5.88199	8.81489	-4.22086	3.83967	503.6	0.1805	0.165	0.16068	0.16563
503.5	6.19823	8.7368	-3.86202	3.15733	503.5	0.18096	0.16529	0.16104	0.16601
503.4	6.18247	8.91924	-3.69064	2.98134	503.4	0.1815	0.16563	0.16136	0.1664
503.3	5.40986	8.49175	-3.76918	2.86729	503.3	0.18198	0.16601	0.16167	0.16689
503.2	4.4162	8.28128	-3.39082	2.63775	503.2	0.18252	0.16643	0.16204	0.16731
503.1	4.43806	9.16192	-3.29649	2.73544	503.1	0.18296	0.16683	0.16236	0.16772
503	5.27339	10.6769	-2.47281	1.65189	503	0.18335	0.16721	0.16267	0.16808
502.9	4.93441	11.6132	-3.03579	1.06134	502.9	0.18369	0.16762	0.16306	0.1684
502.8	6.57109	11.8669	-2.25977	0.62224	502.8	0.18406	0.168	0.16342	0.16871
502.7	5.90424	10.4385	-2.55147	0.23869	502.7	0.18436	0.16836	0.16386	0.16904
502.6	6.32919	10.5103	-4.30895	1.30342	502.6	0.18467	0.1687	0.16425	0.16946
502.5	7.00535	10.5866	-3.71878	1.61187	502.5	0.18502	0.16902	0.16468	0.16992
502.4	7.10305	10.2527	-3.98343	0.8245	502.4	0.18539	0.16938	0.16509	0.17046
502.3	7.64945	10.7712	-4.17802	1.48179	502.3	0.18583	0.16979	0.16553	0.17102
502.2	7.23777	11.3466	-4.33292	1.40527	502.2	0.18643	0.17035	0.16603	0.17175
502.1	7.46649	11.1973	-3.6238	0.43627	502.1	0.1869	0.17078	0.16638	0.17221
502	5.43827	11.2498	-3.18198	0.34033	502	0.18745	0.1711	0.16672	0.17271
501.9	5.25589	11.3673	-3.81993	0.74479	501.9	0.18796	0.17148	0.16705	0.17315
501.8	4.38058	10.1188	-4.43812	0.00988	501.8	0.18837	0.17191	0.16736	0.17357
501.7	5.209	10.3042	-4.38543	0.09848	501.7	0.18874	0.17238	0.16771	0.17395
501.6	5.30741	9.56412	-4.76844	0.78617	501.6	0.18903	0.17286	0.16801	0.17425
501.5	5.21449	9.5353	-5.27675	1.35072	501.5	0.18933	0.17329	0.1683	0.17455
501.4	4.88093	8.71787	-4.40393	1.26546	501.4	0.18966	0.17372	0.16857	0.17487
501.3	5.79562	9.21698	-3.32299	0.51587	501.3	0.19006	0.17406	0.16887	0.1752
501.2	7.51376	8.69398	-3.4946	0.12372	501.2	0.19048	0.17437	0.16923	0.17562
501.1	8.24103	7.97469	-3.49755	0.18586	501.1	0.19096	0.17467	0.16959	0.17604
501	8.33072	9.22496	-2.55075	0.18384	501	0.19141	0.17498	0.17004	0.17657
500.9	8.02639	9.15969	-2.93176	0.45543	500.9	0.19188	0.17532	0.17045	0.17707
500.8	8.31862	8.65686	-3.32384	0.46342	500.8	0.19229	0.17564	0.17086	0.17749
500.7	8.88503	8.69514	-3.88212	0.8008	500.7	0.1927	0.17597	0.17119	0.17796
500.6	8.6117	8.34923	-4.53493	1.34395	500.6	0.19303	0.17629	0.17158	0.17847
500.5	8.85221	9.53931	-5.28313	2.33307	500.5	0.19338	0.1767	0.17192	0.17896
500.4	8.57848	10.049	-4.40634	2.97841	500.4	0.19374	0.17717	0.17228	0.17945
500.3	8.01173	9.24557	-4.57285	4.02258	500.3	0.19404	0.17772	0.17269	0.17985
[truncated: 1,503 more rows]
