# Supplementary material for: Achieving Robust Cholesteric Liquid Crystal Polymer Networks with High Luminescence Dissymmetry Factor
Source: Research Square preprint supplement (doi:10.21203/rs.3.rs-7436711/v1), 2025-09-17
Supplement: Supplementary file 13 [file de9c36dc5ec94b71851609bf.xlsx]

## Sheet: Sheet1
CPL						CD							CPL		CD
	(S-M)0.01-(FC6)0.99-40℃		(S-M)0.03-(FC6)0.97-40℃	(S-M)0.05-(FC6)0.95-50℃	(S-M)0.1-(FC6)0.9-45℃		(S-M)0.01-(FC6)0.99-40℃		(S-M)0.03-(FC6)0.97-40℃	(S-M)0.05-(FC6)0.95-50℃	(S-M)0.1-(FC6)0.9-45℃			(R-M)0.01-(FC6)0.99-40℃		(R-M)0.01-(FC6)0.99-40℃
600	16.7847	600	6.99122	5.87414	0.89504	600	0.00972	600	0.00715	0.00755	0.00803		600	-18.7333	600	0.00803
599	17.5364	599.9	6.90977	6.07445	0.89889	599	0.00978	599.9	0.00716	0.00756	0.00806		599.9	-19.1704	599.9	0.00806
598	17.5574	599.8	6.65937	6.04489	1.08731	598	0.00991	599.8	0.00715	0.00753	0.00802		599.8	-19.3392	599.8	0.00802
597	18.7178	599.7	6.55492	6.20099	0.74928	597	0.01007	599.7	0.00715	0.00755	0.00798		599.7	-19.23	599.7	0.00798
596	19.18	599.6	6.5856	5.83226	0.82127	596	0.01	599.6	0.00717	0.00754	0.00799		599.6	-19.4545	599.6	0.00799
595	19.6333	599.5	6.79779	5.82358	0.70854	595	0.00999	599.5	0.00719	0.00752	0.008		599.5	-19.2751	599.5	0.008
594	19.2171	599.4	6.79719	6.3615	0.41578	594	0.00998	599.4	0.00719	0.00749	0.00799		599.4	-19.4293	599.4	0.00799
593	20.316	599.3	6.82618	6.41824	0.26429	593	0.01012	599.3	0.00723	0.00747	0.00805		599.3	-19.7948	599.3	0.00805
592	20.4518	599.2	6.70402	6.83837	0.78627	592	0.01039	599.2	0.00722	0.00751	0.00804		599.2	-19.5758	599.2	0.00804
591	21.8041	599.1	6.72531	7.06618	0.44913	591	0.01036	599.1	0.00723	0.00753	0.00807		599.1	-19.3323	599.1	0.00807
590	22.8064	599	6.62571	6.85282	-0.16688	590	0.01043	599	0.00727	0.00754	0.00808		599	-19.4057	599	0.00808
589	23.7432	598.9	6.32901	7.00279	-0.30035	589	0.01044	598.9	0.00726	0.00754	0.00809		598.9	-19.215	598.9	0.00809
588	24.4228	598.8	5.98596	6.86952	-0.23142	588	0.01058	598.8	0.00723	0.00755	0.00806		598.8	-19.4286	598.8	0.00806
587	24.8787	598.7	5.94309	6.83982	-0.01747	587	0.01064	598.7	0.00723	0.00754	0.00806		598.7	-19.7163	598.7	0.00806
586	25.8608	598.6	5.63904	6.82139	0.11135	586	0.0107	598.6	0.00722	0.00755	0.00806		598.6	-19.9198	598.6	0.00806
585	27.5906	598.5	5.69885	6.79371	0.0525	585	0.01087	598.5	0.00723	0.00752	0.00806		598.5	-19.8771	598.5	0.00806
584	28.6589	598.4	6.07242	6.8911	0.46332	584	0.01093	598.4	0.00725	0.00749	0.00807		598.4	-20.1855	598.4	0.00807
583	28.6349	598.3	6.11006	6.81468	0.26382	583	0.01112	598.3	0.00723	0.00751	0.00809		598.3	-20.2498	598.3	0.00809
582	26.8832	598.2	6.086	6.8458	-0.00916	582	0.01113	598.2	0.00721	0.00753	0.00811		598.2	-20.3177	598.2	0.00811
581	28.0432	598.1	5.97758	7.24848	-0.22878	581	0.01119	598.1	0.0072	0.00751	0.00812		598.1	-19.8713	598.1	0.00812
580	29.638	598	6.20831	7.22888	-0.18997	580	0.01118	598	0.00725	0.00753	0.0081		598	-20.2486	598	0.0081
579	33.6162	597.9	6.29492	7.22831	0.16052	579	0.01122	597.9	0.00723	0.00751	0.00813		597.9	-20.1302	597.9	0.00813
578	35.1466	597.8	6.63764	7.13274	-0.12312	578	0.01134	597.8	0.00723	0.00749	0.00814		597.8	-20.2755	597.8	0.00814
577	36.6245	597.7	6.78197	7.29201	-0.45407	577	0.01146	597.7	0.00722	0.00747	0.00815		597.7	-20.2244	597.7	0.00815
576	37.0397	597.6	6.82039	7.39398	0.462	576	0.01165	597.6	0.00726	0.00751	0.00814		597.6	-20.1703	597.6	0.00814
575	37.4777	597.5	6.95834	7.1477	0.71275	575	0.01189	597.5	0.00728	0.0075	0.00813		597.5	-20.1943	597.5	0.00813
574	37.2385	597.4	7.07295	7.09605	1.0421	574	0.01209	597.4	0.00725	0.00754	0.00815		597.4	-20.6863	597.4	0.00815
573	38.3946	597.3	7.16931	7.24623	1.11199	573	0.01216	597.3	0.00726	0.00754	0.00813		597.3	-20.5907	597.3	0.00813
572	39.3546	597.2	7.13193	7.16932	1.14079	572	0.01222	597.2	0.00726	0.00754	0.00815		597.2	-20.5271	597.2	0.00815
571	42.7389	597.1	7.23855	7.38889	0.73173	571	0.01239	597.1	0.00727	0.00754	0.00819		597.1	-20.8352	597.1	0.00819
570	44.2275	597	7.5341	7.23769	0.69297	570	0.01246	597	0.00728	0.00753	0.0082		597	-21.0459	597	0.0082
569	46.0558	596.9	7.97306	7.54233	0.18006	569	0.01246	596.9	0.00727	0.00753	0.00821		596.9	-21.0108	596.9	0.00821
568	46.127	596.8	7.98751	7.82696	0.57552	568	0.01267	596.8	0.00728	0.00752	0.00821		596.8	-21.3178	596.8	0.00821
567	47.2676	596.7	7.81787	7.89626	-0.17134	567	0.01293	596.7	0.00731	0.00754	0.00823		596.7	-21.193	596.7	0.00823
566	48.2576	596.6	7.96444	7.73994	-0.11719	566	0.0132	596.6	0.00736	0.00753	0.00827		596.6	-21.0724	596.6	0.00827
565	51.0432	596.5	7.96776	7.55601	-0.18933	565	0.01338	596.5	0.00741	0.00754	0.00831		596.5	-21.6116	596.5	0.00831
564	52.6427	596.4	8.13919	7.63681	-0.25291	564	0.01344	596.4	0.00743	0.00752	0.00836		596.4	-21.3959	596.4	0.00836
563	55.9933	596.3	8.41981	7.83277	0.25066	563	0.01358	596.3	0.00742	0.00755	0.00836		596.3	-21.2719	596.3	0.00836
562	55.5056	596.2	8.23912	7.81999	0.15622	562	0.01374	596.2	0.00741	0.00757	0.00838		596.2	-21.361	596.2	0.00838
561	58.1287	596.1	8.39191	7.56091	0.87957	561	0.01401	596.1	0.00743	0.00757	0.00845		596.1	-21.1222	596.1	0.00845
560	61.1101	596	8.54995	7.3444	0.70519	560	0.01425	596	0.00742	0.00762	0.00838		596	-21.1398	596	0.00838
559	61.6655	595.9	8.33289	7.26081	0.7014	559	0.01436	595.9	0.00741	0.00758	0.00841		595.9	-21.509	595.9	0.00841
558	63.4646	595.8	8.50208	6.88743	0.63267	558	0.01454	595.8	0.00742	0.00758	0.00843		595.8	-21.7548	595.8	0.00843
557	65.1857	595.7	8.39314	7.39746	0.87575	557	0.01466	595.7	0.0074	0.00757	0.00846		595.7	-21.8554	595.7	0.00846
556	68.8976	595.6	8.73169	7.63898	1.12625	556	0.01482	595.6	0.0074	0.00761	0.00846		595.6	-22.1166	595.6	0.00846
555	72.9052	595.5	9.08813	8.08836	1.14982	555	0.01511	595.5	0.00742	0.0076	0.0085		595.5	-22.0617	595.5	0.0085
554	76.4968	595.4	9.3877	8.42043	0.91641	554	0.0153	595.4	0.00745	0.0076	0.0085		595.4	-22.2966	595.4	0.0085
553	78.7542	595.3	9.69293	8.21161	0.4703	553	0.01566	595.3	0.00745	0.00762	0.00852		595.3	-22.3596	595.3	0.00852
552	79.3232	595.2	9.93028	8.58174	0.72599	552	0.01594	595.2	0.00743	0.00766	0.00851		595.2	-22.7739	595.2	0.00851
551	80.3335	595.1	9.75994	8.97826	0.41441	551	0.01628	595.1	0.00744	0.00768	0.00852		595.1	-22.7928	595.1	0.00852
550	84.2558	595	9.71021	9.2394	0.80518	550	0.01659	595	0.00748	0.00769	0.00853		595	-22.7546	595	0.00853
549	86.6112	594.9	9.84484	9.22619	0.88793	549	0.01678	594.9	0.00748	0.00769	0.00851		594.9	-22.8291	594.9	0.00851
548	90.8754	594.8	9.83746	9.09888	1.29753	548	0.01709	594.8	0.00746	0.00774	0.00853		594.8	-23.1813	594.8	0.00853
547	93.2071	594.7	9.52873	9.31781	1.62044	547	0.01752	594.7	0.00744	0.0077	0.00854		594.7	-23.2144	594.7	0.00854
546	96.3411	594.6	9.44561	9.43664	1.71794	546	0.01777	594.6	0.00747	0.00772	0.00853		594.6	-23.4975	594.6	0.00853
545	98.5869	594.5	9.4633	9.28904	2.0328	545	0.01792	594.5	0.00748	0.00776	0.00854		594.5	-23.1256	594.5	0.00854
544	103.196	594.4	9.81966	9.29547	1.75485	544	0.01807	594.4	0.0075	0.00777	0.00854		594.4	-23.0261	594.4	0.00854
543	106.751	594.3	10.0345	9.44378	1.11941	543	0.01852	594.3	0.00748	0.00775	0.00856		594.3	-23.2575	594.3	0.00856
542	113.78	594.2	9.97548	9.50475	0.52829	542	0.019	594.2	0.00748	0.0078	0.00857		594.2	-23.1537	594.2	0.00857
541	119.669	594.1	9.98709	9.68602	0.30155	541	0.01948	594.1	0.00752	0.00777	0.00856		594.1	-23.2558	594.1	0.00856
540	123.947	594	10.0027	9.44042	0.22652	540	0.02002	594	0.00755	0.00776	0.0086		594	-23.1483	594	0.0086
539	128.056	593.9	9.93135	9.64483	-0.313	539	0.0202	593.9	0.00755	0.00779	0.00861		593.9	-23.6403	593.9	0.00861
538	130.134	593.8	9.66835	9.31037	0.21284	538	0.02075	593.8	0.00757	0.0078	0.00859		593.8	-23.6452	593.8	0.00859
537	133.897	593.7	9.5055	9.03953	0.6309	537	0.0212	593.7	0.00759	0.00782	0.00859		593.7	-23.577	593.7	0.00859
536	138.507	593.6	9.30319	8.98703	0.81728	536	0.02176	593.6	0.00763	0.0078	0.00862		593.6	-23.4773	593.6	0.00862
535	141.912	593.5	9.299	8.86941	0.35456	535	0.02214	593.5	0.0076	0.00785	0.00867		593.5	-23.5899	593.5	0.00867
534	145.671	593.4	9.58789	9.16837	0.64537	534	0.02246	593.4	0.00762	0.00787	0.00866		593.4	-23.6152	593.4	0.00866
533	152.605	593.3	9.70783	9.40551	0.54277	533	0.02285	593.3	0.00761	0.0079	0.00865		593.3	-23.809	593.3	0.00865
532	160.058	593.2	9.75133	9.57369	0.38949	532	0.02334	593.2	0.00762	0.00793	0.00868		593.2	-23.296	593.2	0.00868
531	168.863	593.1	9.88213	9.4783	1.16644	531	0.02385	593.1	0.00766	0.00798	0.00866		593.1	-23.6186	593.1	0.00866
530	173.964	593	9.76465	9.97206	0.46718	530	0.02447	593	0.0077	0.00803	0.00867		593	-23.6212	593	0.00867
529	177.392	592.9	9.80624	10.0885	0.47398	529	0.02501	592.9	0.00772	0.00807	0.00872		592.9	-23.5103	592.9	0.00872
528	184.793	592.8	9.76063	10.1483	0.01526	528	0.02572	592.8	0.00772	0.00805	0.0087		592.8	-23.7144	592.8	0.0087
527	189.047	592.7	9.78332	9.94537	-0.25955	527	0.0263	592.7	0.00776	0.00805	0.00877		592.7	-23.8382	592.7	0.00877
526	196.72	592.6	9.56427	10.1317	-0.03485	526	0.02699	592.6	0.00779	0.00811	0.00877		592.6	-24.2449	592.6	0.00877
525	204.462	592.5	9.48983	10.3918	0.4526	525	0.02754	592.5	0.00784	0.00814	0.00876		592.5	-24.0963	592.5	0.00876
524	213.164	592.4	9.755	10.2619	0.54742	524	0.02816	592.4	0.00784	0.00814	0.00875		592.4	-24.3262	592.4	0.00875
523	221.938	592.3	10.1734	10.0132	0.21287	523	0.02883	592.3	0.00789	0.00812	0.00876		592.3	-24.2856	592.3	0.00876
522	229.923	592.2	10.1271	9.8241	0.40354	522	0.02952	592.2	0.00796	0.00814	0.00876		592.2	-24.6426	592.2	0.00876
521	235.98	592.1	9.96139	9.40941	0.60682	521	0.03026	592.1	0.00796	0.00816	0.00879		592.1	-24.3447	592.1	0.00879
520	244.98	592	9.64338	9.96097	0.52205	520	0.03101	592	0.00798	0.00814	0.0088		592	-24.5528	592	0.0088
519	254.468	591.9	9.79769	9.83474	0.51813	519	0.03184	591.9	0.008	0.00813	0.00884		591.9	-24.7967	591.9	0.00884
518	263.769	591.8	9.77279	9.66538	0.96525	518	0.03266	591.8	0.00803	0.00815	0.00887		591.8	-24.7209	591.8	0.00887
517	270.361	591.7	9.87664	9.11898	0.48539	517	0.03352	591.7	0.00803	0.00815	0.00889		591.7	-24.8817	591.7	0.00889
516	279.452	591.6	10.2394	9.69366	0.33691	516	0.03437	591.6	0.00804	0.00818	0.00892		591.6	-25.1035	591.6	0.00892
515	287.424	591.5	9.96445	9.76845	-0.01958	515	0.03538	591.5	0.00808	0.00821	0.00893		591.5	-25.1243	591.5	0.00893
514	297.708	591.4	9.97364	9.46557	0.01633	514	0.03629	591.4	0.00809	0.00826	0.00895		591.4	-25.1568	591.4	0.00895
513	311.041	591.3	10.0667	9.57587	-0.76421	513	0.0372	591.3	0.0081	0.00829	0.00895		591.3	-25.406	591.3	0.00895
512	324.498	591.2	10.1128	10.0351	-1.40413	512	0.03833	591.2	0.00813	0.00831	0.00898		591.2	-25.6439	591.2	0.00898
511	340.584	591.1	9.61977	9.96266	-0.81257	511	0.03938	591.1	0.00813	0.00831	0.00899		591.1	-25.9625	591.1	0.00899
510	355.28	591	9.35612	9.81717	-0.90986	510	0.04059	591	0.00813	0.00833	0.00899		591	-26.0899	591	0.00899
509	367.567	590.9	9.6347	10.0472	-0.85088	509	0.04153	590.9	0.00815	0.00835	0.00899		590.9	-26.3684	590.9	0.00899
508	381.36	590.8	9.7479	9.97677	-0.7233	508	0.04288	590.8	0.00818	0.00835	0.00899		590.8	-26.4297	590.8	0.00899
507	394.853	590.7	9.61565	9.96734	-0.77773	507	0.04426	590.7	0.00821	0.00838	0.00899		590.7	-26.519	590.7	0.00899
506	409.322	590.6	10.0827	10.0076	-0.57051	506	0.04551	590.6	0.00821	0.00836	0.00899		590.6	-26.1517	590.6	0.00899
505	424.819	590.5	10.3115	10.2134	-0.68454	505	0.04675	590.5	0.00822	0.00839	0.009		590.5	-26.2861	590.5	0.009
504	442.02	590.4	10.375	10.3702	-0.56734	504	0.04803	590.4	0.00822	0.00837	0.00902		590.4	-26.2386	590.4	0.00902
503	458.823	590.3	10.2908	10.271	-0.57985	503	0.04948	590.3	0.00821	0.00838	0.00901		590.3	-26.3992	590.3	0.00901
502	475.701	590.2	10.5978	10.3317	-0.68673	502	0.05096	590.2	0.00826	0.00841	0.00903		590.2	-26.3126	590.2	0.00903
501	494.592	590.1	10.2767	10.2128	-0.65475	501	0.05244	590.1	0.00825	0.0084	0.00901		590.1	-26.4335	590.1	0.00901
500	509.662	590	10.5549	10.3542	-0.31432	500	0.05377	590	0.00825	0.00843	0.00902		590	-26.3559	590	0.00902
499	527.68	589.9	10.6127	10.287	-0.07709	499	0.05532	589.9	0.00823	0.00845	0.00901		589.9	-26.8999	589.9	0.00901
498	543.386	589.8	10.38	10.1757	-0.5995	498	0.05702	589.8	0.0082	0.00845	0.00905		589.8	-26.8473	589.8	0.00905
497	561.67	589.7	10.4392	9.93156	-0.01597	497	0.05867	589.7	0.0082	0.00843	0.00903		589.7	-26.8348	589.7	0.00903
496	581.256	589.6	10.4364	10.0593	0.23602	496	0.06036	589.6	0.0082	0.00841	0.00901		589.6	-27.0196	589.6	0.00901
495	600.218	589.5	10.4049	10.1638	0.37984	495	0.06215	589.5	0.00822	0.00845	0.00902		589.5	-26.9981	589.5	0.00902
494	621.224	589.4	10.315	10.4451	0.29527	494	0.06417	589.4	0.00822	0.00844	0.00901		589.4	-27.1518	589.4	0.00901
493	643.924	589.3	10.5747	10.365	0.39021	493	0.0662	589.3	0.00825	0.0084	0.00904		589.3	-26.8817	589.3	0.00904
492	666.423	589.2	10.918	10.3337	0.10144	492	0.06798	589.2	0.00826	0.0084	0.00904		589.2	-27.092	589.2	0.00904
491	693.907	589.1	10.828	10.1632	0.19866	491	0.07017	589.1	0.00828	0.00843	0.0091		589.1	-27.3366	589.1	0.0091
490	717.575	589	10.7659	10.3724	-0.05997	490	0.07244	589	0.00827	0.00847	0.0091		589	-27.3453	589	0.0091
489	742.993	588.9	10.7315	10.0452	0.18291	489	0.07492	588.9	0.00823	0.00854	0.00908		588.9	-27.611	588.9	0.00908
488	767.227	588.8	10.8322	9.91394	0.37175	488	0.0772	588.8	0.00826	0.00857	0.00912		588.8	-27.9263	588.8	0.00912
487	798.439	588.7	11.372	10.0064	0.56595	487	0.07954	588.7	0.00827	0.00859	0.00913		588.7	-28.1553	588.7	0.00913
486	829.511	588.6	11.2125	9.91282	1.02992	486	0.08189	588.6	0.00826	0.00863	0.00915		588.6	-27.7457	588.6	0.00915
485	856.361	588.5	11.3471	10.4118	0.62483	485	0.08437	588.5	0.00827	0.00863	0.00915		588.5	-27.8858	588.5	0.00915
484	889.134	588.4	11.4669	10.5853	0.64669	484	0.08711	588.4	0.00828	0.00866	0.00917		588.4	-27.6373	588.4	0.00917
483	917.067	588.3	11.3597	10.031	0.79179	483	0.08993	588.3	0.00827	0.00863	0.00917		588.3	-27.5661	588.3	0.00917
482	951.404	588.2	11.7548	10.0685	0.70075	482	0.0926	588.2	0.00824	0.00865	0.00919		588.2	-27.5843	588.2	0.00919
481	982.701	588.1	11.8795	10.1123	0.69039	481	0.09548	588.1	0.00828	0.00863	0.00917		588.1	-27.6956	588.1	0.00917
480	1022.43	588	12.015	9.92704	1.36559	480	0.09895	588	0.00825	0.00866	0.0092		588	-27.8227	588	0.0092
479	1062.46	587.9	12.1187	9.74407	1.70157	479	0.10215	587.9	0.00826	0.00865	0.0092		587.9	-27.8573	587.9	0.0092
478	1103.83	587.8	12.353	9.95933	1.70198	478	0.10554	587.8	0.00834	0.0087	0.00923		587.8	-27.8138	587.8	0.00923
477	1139.04	587.7	12.4149	9.74689	1.1429	477	0.10892	587.7	0.00835	0.00867	0.00926		587.7	-27.7289	587.7	0.00926
476	1182.56	587.6	12.0109	9.775	0.90261	476	0.1125	587.6	0.00835	0.00867	0.00927		587.6	-27.5826	587.6	0.00927
475	1223.28	587.5	12.0823	9.6529	0.56636	475	0.11656	587.5	0.00835	0.0087	0.00933		587.5	-27.6207	587.5	0.00933
474	1269.68	587.4	12.1908	9.62859	0.78445	474	0.12035	587.4	0.00835	0.00868	0.00935		587.4	-27.9174	587.4	0.00935
473	1318.89	587.3	12.1251	9.62784	1.19648	473	0.12415	587.3	0.00837	0.00872	0.00937		587.3	-27.7906	587.3	0.00937
472	1366.85	587.2	12.2596	10.0426	1.42993	472	0.12792	587.2	0.00838	0.00874	0.00938		587.2	-27.7829	587.2	0.00938
471	1418.29	587.1	12.3744	9.91176	0.94133	471	0.13218	587.1	0.00839	0.00877	0.00938		587.1	-27.8982	587.1	0.00938
470	1469.53	587	12.6191	9.90809	0.78318	470	0.13671	587	0.00841	0.00876	0.00941		587	-28.5165	587	0.00941
469	1514.21	586.9	12.4662	9.8589	1.45926	469	0.14076	586.9	0.00844	0.00877	0.00944		586.9	-28.5397	586.9	0.00944
468	1561.97	586.8	12.732	9.36797	1.34063	468	0.14482	586.8	0.00845	0.00881	0.00945		586.8	-28.6121	586.8	0.00945
467	1622.12	586.7	12.3092	9.47734	1.28801	467	0.1497	586.7	0.00849	0.00882	0.00947		586.7	-28.8172	586.7	0.00947
466	1665.58	586.6	12.5357	9.5237	0.96908	466	0.15406	586.6	0.00853	0.0088	0.00949		586.6	-28.6481	586.6	0.00949
465	1720.63	586.5	12.8719	9.4867	0.42239	465	0.15895	586.5	0.00856	0.00879	0.00947		586.5	-28.7103	586.5	0.00947
464	1764.39	586.4	13.0655	9.61829	0.43805	464	0.16384	586.4	0.00859	0.00882	0.00951		586.4	-29.058	586.4	0.00951
463	1819.41	586.3	13.2903	9.40875	-0.15163	463	0.16869	586.3	0.00861	0.00885	0.0095		586.3	-28.9376	586.3	0.0095
462	1877.74	586.2	13.4176	9.06662	0.11002	462	0.17366	586.2	0.00861	0.00884	0.00953		586.2	-29.2855	586.2	0.00953
461	1944.77	586.1	13.5531	8.72552	0.31546	461	0.17917	586.1	0.00862	0.00886	0.00955		586.1	-28.8819	586.1	0.00955
460	2000.42	586	13.4352	9.09516	0.08131	460	0.18416	586	0.00862	0.00891	0.00955		586	-29.2558	586	0.00955
459	2052.27	585.9	13.101	9.52236	-0.274	459	0.18848	585.9	0.00866	0.00897	0.00963		585.9	-29.3407	585.9	0.00963
458	2107.31	585.8	12.9975	9.43132	-0.3107	458	0.19376	585.8	0.00866	0.00895	0.00959		585.8	-29.4768	585.8	0.00959
457	2176.98	585.7	13.0526	9.36232	0.09379	457	0.19943	585.7	0.00868	0.00893	0.00959		585.7	-29.3259	585.7	0.00959
456	2251.91	585.6	13.1254	9.60006	-0.16145	456	0.20579	585.6	0.00872	0.00893	0.00963		585.6	-29.2102	585.6	0.00963
455	2317.25	585.5	13.0439	9.9236	-0.57244	455	0.21171	585.5	0.00873	0.00891	0.00961		585.5	-29.4259	585.5	0.00961
454	2385.09	585.4	12.7424	9.96511	-0.89822	454	0.21768	585.4	0.00874	0.00891	0.00962		585.4	-29.3072	585.4	0.00962
453	2447.8	585.3	12.6602	10.0324	-1.3646	453	0.22367	585.3	0.00879	0.00893	0.0096		585.3	-29.7044	585.3	0.0096
452	2521.45	585.2	12.6884	9.72439	-1.32107	452	0.23014	585.2	0.00879	0.00893	0.00959		585.2	-29.9684	585.2	0.00959
451	2595.73	585.1	12.2469	9.65114	-1.00013	451	0.2365	585.1	0.00882	0.00893	0.00959		585.1	-29.932	585.1	0.00959
450	2669.9	585	12.7421	10.2889	-1.44161	450	0.24288	585	0.00886	0.00897	0.00963		585	-30.1412	585	0.00963
449	2730.02	584.9	12.3556	10.1781	-1.36824	449	0.24872	584.9	0.0089	0.00896	0.00961		584.9	-29.9608	584.9	0.00961
448	2805.3	584.8	12.5405	10.3744	-1.15846	448	0.25542	584.8	0.00892	0.00899	0.00965		584.8	-30.1525	584.8	0.00965
447	2892.25	584.7	12.5041	10.0951	-1.78687	447	0.2629	584.7	0.00896	0.00897	0.00964		584.7	-30.0198	584.7	0.00964
446	2972.44	584.6	12.551	10.5034	-2.14235	446	0.27037	584.6	0.00898	0.009	0.00965		584.6	-30.0106	584.6	0.00965
445	3055.96	584.5	12.5409	10.5432	-2.34033	445	0.27826	584.5	0.00896	0.00902	0.00965		584.5	-30.0181	584.5	0.00965
444	3146	584.4	12.6872	10.6861	-1.86571	444	0.28633	584.4	0.00898	0.00902	0.00967		584.4	-30.1954	584.4	0.00967
443	3229.23	584.3	12.6407	10.9861	-1.19981	443	0.29427	584.3	0.009	0.00909	0.00968		584.3	-30.5535	584.3	0.00968
442	3318.42	584.2	12.8866	11.3723	-0.36274	442	0.30243	584.2	0.00901	0.00911	0.00968		584.2	-30.8856	584.2	0.00968
441	3406.8	584.1	12.8187	11.6731	-0.18108	441	0.31028	584.1	0.00903	0.00911	0.00967		584.1	-30.783	584.1	0.00967
440	3497.73	584	12.4671	11.698	-0.50115	440	0.31909	584	0.00904	0.00912	0.0097		584	-30.5687	584	0.0097
439	3594.71	583.9	12.4721	11.7124	-0.52745	439	0.32785	583.9	0.00908	0.00913	0.00974		583.9	-30.9631	583.9	0.00974
438	3689.91	583.8	12.4121	11.7035	-0.30845	438	0.3368	583.8	0.00908	0.00914	0.00973		583.8	-31.0602	583.8	0.00973
437	3776.38	583.7	12.6327	11.8329	-0.6679	437	0.34626	583.7	0.00911	0.00912	0.00974		583.7	-31.4059	583.7	0.00974
436	3861.79	583.6	12.8158	11.7711	-0.64207	436	0.35427	583.6	0.00912	0.00913	0.00973		583.6	-31.3939	583.6	0.00973
435	3934.53	583.5	12.7093	11.8094	-0.91394	435	0.36139	583.5	0.00912	0.00914	0.00976		583.5	-31.5051	583.5	0.00976
434	4020.22	583.4	12.6758	11.8338	-1.18488	434	0.36854	583.4	0.00914	0.00913	0.00976		583.4	-31.4847	583.4	0.00976
433	4096.19	583.3	12.8334	11.4592	-1.07176	433	0.37632	583.3	0.00914	0.00918	0.00978		583.3	-31.7244	583.3	0.00978
432	4169.93	583.2	12.7093	11.6458	-0.65007	432	0.38385	583.2	0.00913	0.0092	0.00978		583.2	-32.2806	583.2	0.00978
431	4238.48	583.1	12.8022	11.2564	-0.3841	431	0.39138	583.1	0.0091	0.00922	0.0098		583.1	-32.1275	583.1	0.0098
430	4308.98	583	12.6944	11.6587	-0.71296	430	0.39792	583	0.00911	0.00927	0.00983		583	-32.4201	583	0.00983
429	4382.06	582.9	12.3832	11.9885	-0.97088	429	0.40576	582.9	0.00914	0.00925	0.00986		582.9	-32.4357	582.9	0.00986
428	4444.56	582.8	12.4353	11.8632	-1.04115	428	0.41166	582.8	0.00916	0.00928	0.00984		582.8	-32.8082	582.8	0.00984
427	4480.28	582.7	12.4856	11.7064	-0.91225	427	0.41614	582.7	0.00919	0.0093	0.00987		582.7	-32.6172	582.7	0.00987
426	4507.65	582.6	12.5116	11.4236	-0.85366	426	0.41953	582.6	0.00919	0.00925	0.00989		582.6	-32.8081	582.6	0.00989
425	4556.28	582.5	12.5	11.5773	-0.67548	425	0.42441	582.5	0.00922	0.00929	0.00991		582.5	-32.7719	582.5	0.00991
424	4582.58	582.4	12.3993	11.8957	-0.72427	424	0.42839	582.4	0.00922	0.00931	0.00993		582.4	-33.2442	582.4	0.00993
423	4615.42	582.3	12.5311	11.8853	-0.23445	423	0.43272	582.3	0.0092	0.0093	0.00998		582.3	-32.9995	582.3	0.00998
422	4652.12	582.2	12.2586	11.8323	0.04565	422	0.43662	582.2	0.00921	0.00932	0.00996		582.2	-32.7763	582.2	0.00996
421	4697.23	582.1	12.8171	11.8677	0.02825	421	0.44133	582.1	0.00921	0.00937	0.00999		582.1	-33.1237	582.1	0.00999
420	4720.01	582	12.7313	12.0773	0.01601	420	0.44441	582	0.00922	0.00939	0.01001		582	-33.1483	582	0.01001
419	4736.11	581.9	12.8765	12.2871	0.1919	419	0.44713	581.9	0.0092	0.00938	0.01001		581.9	-32.9808	581.9	0.01001
418	4745.09	581.8	13.1654	12.5551	-0.25778	418	0.44955	581.8	0.00922	0.0094	0.01002		581.8	-33.2921	581.8	0.01002
417	4761.4	581.7	13.0748	12.3623	-0.000591024	417	0.45286	581.7	0.00924	0.0094	0.01003		581.7	-33.2877	581.7	0.01003
416	4766.58	581.6	13.0112	12.4908	0.00419	416	0.45531	581.6	0.00929	0.00943	0.01005		581.6	-33.4798	581.6	0.01005
415	4755.67	581.5	13.462	12.7251	-0.31414	415	0.45654	581.5	0.00925	0.00946	0.01008		581.5	-33.7757	581.5	0.01008
414	4729.63	581.4	13.4812	13.0267	-0.4158	414	0.45587	581.4	0.00925	0.00949	0.01012		581.4	-33.8582	581.4	0.01012
413	4703.42	581.3	13.3344	12.9246	-0.28608	413	0.45508	581.3	0.00926	0.00952	0.01012		581.3	-34.0615	581.3	0.01012
412	4668.69	581.2	13.2322	13.0159	-0.47522	412	0.45362	581.2	0.00928	0.00956	0.01012		581.2	-33.8816	581.2	0.01012
411	4624.42	581.1	13.5347	12.9944	-0.72234	411	0.45074	581.1	0.00929	0.00959	0.01008		581.1	-34.1477	581.1	0.01008
410	4541.79	581	13.845	12.99	-1.25348	410	0.4455	581	0.00927	0.0096	0.01008		581	-34.1408	581	0.01008
409	4456.16	580.9	13.7825	12.9325	-1.63697	409	0.43922	580.9	0.00927	0.0096	0.0101		580.9	-34.1687	580.9	0.0101
408	4345.6	580.8	13.8681	12.7966	-1.67867	408	0.43096	580.8	0.00928	0.00961	0.01012		580.8	-34.3287	580.8	0.01012
407	4224.81	580.7	13.8601	13.0336	-1.76934	407	0.42242	580.7	0.00931	0.00964	0.01017		580.7	-34.5637	580.7	0.01017
406	4098.95	580.6	13.9676	13.0265	-1.61716	406	0.41259	580.6	0.00935	0.00965	0.01017		580.6	-34.6675	580.6	0.01017
405	3976.24	580.5	14.0828	13.0517	-1.5991	405	0.40277	580.5	0.00936	0.00967	0.01018		580.5	-34.6929	580.5	0.01018
404	3806.03	580.4	13.8847	13.2545	-1.83067	404	0.38999	580.4	0.00934	0.00973	0.01022		580.4	-34.8976	580.4	0.01022
403	3660.76	580.3	13.7539	13.3781	-1.58974	403	0.37739	580.3	0.00938	0.00976	0.01022		580.3	-35.0333	580.3	0.01022
402	3477.75	580.2	13.6581	13.1646	-1.97117	402	0.36299	580.2	0.00937	0.00981	0.01026		580.2	-34.8532	580.2	0.01026
401	3318.59	580.1	14.1324	13.3997	-1.81156	401	0.34911	580.1	0.00936	0.00982	0.01029		580.1	-34.9568	580.1	0.01029
400	3157.49	580	13.8378	13.6878	-1.47671	400	0.33458	580	0.00936	0.00983	0.01031		580	-35.1044	580	0.01031
399	2991.29	579.9	14.313	13.6199	-1.47333	399	0.32003	579.9	0.00937	0.00984	0.01036		579.9	-34.7654	579.9	0.01036
398	2801.46	579.8	14.3676	13.7077	-1.50416	398	0.30308	579.8	0.00942	0.00982	0.01036		579.8	-34.5647	579.8	0.01036
397	2623.38	579.7	13.9852	13.808	-0.75711	397	0.28699	579.7	0.00942	0.00981	0.01038		579.7	-34.6832	579.7	0.01038
396	2451.76	579.6	13.8494	13.5298	-0.43154	396	0.27045	579.6	0.00943	0.00981	0.0104		579.6	-35.0182	579.6	0.0104
395	2295.15	579.5	13.9066	13.7503	-0.44442	395	0.25599	579.5	0.00941	0.00982	0.0104		579.5	-34.6445	579.5	0.0104
394	2152.27	579.4	14.2529	13.5391	-0.50347	394	0.24188	579.4	0.00941	0.00981	0.01044		579.4	-34.8625	579.4	0.01044
393	1994.69	579.3	14.3727	13.2315	-0.22654	393	0.22747	579.3	0.00938	0.00984	0.01042		579.3	-35.4557	579.3	0.01042
392	1841.74	579.2	14.149	13.3689	-0.43402	392	0.21306	579.2	0.00937	0.00987	0.01042		579.2	-35.7651	579.2	0.01042
391	1694.33	579.1	14.3972	13.0253	-0.00745	391	0.19853	579.1	0.0094	0.00987	0.01044		579.1	-35.5709	579.1	0.01044
390	1531.98	579	14.2643	12.985	-0.8306	390	0.18288	579	0.00943	0.0099	0.01045		579	-35.9317	579	0.01045
389	1381.85	578.9	13.8836	13.1106	-1.52217	389	0.16817	578.9	0.00947	0.00992	0.01048		578.9	-36.1395	578.9	0.01048
388	1231.45	578.8	13.699	13.2736	-2.1141	388	0.15326	578.8	0.00951	0.00993	0.01049		578.8	-35.9149	578.8	0.01049
387	1076.58	578.7	13.6677	13.3259	-1.70598	387	0.13848	578.7	0.00952	0.00997	0.01049		578.7	-35.9057	578.7	0.01049
386	940.248	578.6	13.646	13.1331	-1.75128	386	0.12387	578.6	0.00957	0.00998	0.01051		578.6	-36.0197	578.6	0.01051
385	805.626	578.5	13.4514	12.7328	-1.10106	385	0.10991	578.5	0.00957	0.00998	0.0106		578.5	-36.0219	578.5	0.0106
384	672.847	578.4	13.3962	12.8856	-1.10484	384	0.09598	578.4	0.0096	0.01	0.01061		578.4	-36.339	578.4	0.01061
383	549.566	578.3	13.5268	13.1106	-0.65888	383	0.0827	578.3	0.0096	0.01003	0.01065		578.3	-36.3853	578.3	0.01065
382	443.079	578.2	13.1908	13.1505	-0.91606	382	0.07079	578.2	0.00962	0.00998	0.01067		578.2	-36.3061	578.2	0.01067
381	350.706	578.1	12.885	13.181	-0.45662	381	0.05975	578.1	0.00965	0.00997	0.0107		578.1	-36.6659	578.1	0.0107
380	269.076	578	12.7825	13.09	-0.42881	380	0.04992	578	0.00966	0.01	0.01073		578	-37.2429	578	0.01073
379	200.78	577.9	13.0064	13.2095	0.32467	379	0.04137	577.9	0.00964	0.00999	0.01077		577.9	-37.5344	577.9	0.01077
378	145.01	577.8	12.9443	13.0082	0.56403	378	0.0343	577.8	0.00967	0.01	0.01082		577.8	-37.8461	577.8	0.01082
377	102.921	577.7	12.8332	12.6629	1.06668	377	0.02829	577.7	0.00971	0.01002	0.01085		577.7	-38.0723	577.7	0.01085
376	71.0067	577.6	12.7908	12.5154	1.1308	376	0.02325	577.6	0.00975	0.01002	0.01089		577.6	-38.193	577.6	0.01089
375	46.0822	577.5	12.9082	12.572	0.73472	375	0.01932	577.5	0.00974	0.01003	0.01088		577.5	-38.5265	577.5	0.01088
374	31.8025	577.4	13.0583	12.307	0.75288	374	0.01634	577.4	0.00977	0.01001	0.01086		577.4	-38.3882	577.4	0.01086
373	21.3474	577.3	13.4263	12.2388	0.49611	373	0.01417	577.3	0.00975	0.01003	0.01088		577.3	-38.8	577.3	0.01088
372	13.7335	577.2	13.5995	12.1306	0.19147	372	0.01233	577.2	0.00979	0.01006	0.01091		577.2	-39.2128	577.2	0.01091
371	8.16239	577.1	13.8342	12.3061	0.36147	371	0.0112	577.1	0.00979	0.01005	0.01088		577.1	-39.2208	577.1	0.01088
370	5.16585	577	13.6595	12.757	0.31224	370	0.01027	577	0.00982	0.01008	0.0109		577	-38.9364	577	0.0109
369	3.51387	576.9	13.581	12.753	0.33781	369	0.00954	576.9	0.00987	0.01005	0.01093		576.9	-39.3641	576.9	0.01093
368	2.51425	576.8	13.2818	12.8222	0.79184	368	0.00906	576.8	0.00988	0.01008	0.01096		576.8	-39.383	576.8	0.01096
367	1.18277	576.7	13.0404	12.76	1.25559	367	0.00883	576.7	0.0099	0.01012	0.01099		576.7	-39.6391	576.7	0.01099
366	0.42629	576.6	12.482	13.0295	0.86761	366	0.00853	576.6	0.00992	0.01013	0.01101		576.6	-39.6145	576.6	0.01101
365	-0.19348	576.5	12.5753	13.2136	0.36833	365	0.0083	576.5	0.00992	0.01016	0.01101		576.5	-39.861	576.5	0.01101
364	0.5609	576.4	12.7065	13.6217	-0.14034	364	0.00811	576.4	0.00996	0.01017	0.01104		576.4	-39.9183	576.4	0.01104
363	0.61843	576.3	13.0685	13.3609	-0.5732	363	0.00786	576.3	0.00999	0.01022	0.01106		576.3	-40.4921	576.3	0.01106
362	0.49716	576.2	12.8747	13.3526	0.20168	362	0.00771	576.2	0.01003	0.01022	0.01109		576.2	-41.053	576.2	0.01109
361	0.2719	576.1	12.9512	13.6102	0.08727	361	0.0077	576.1	0.01008	0.01027	0.01111		576.1	-40.611	576.1	0.01111
360	-0.5616	576	13.1079	14.1454	0.14178	360	0.00778	576	0.01008	0.01026	0.01111		576	-40.6345	576	0.01111
359	-0.60491	575.9	13.1765	13.4951	-0.25065	359	0.00783	575.9	0.01013	0.01028	0.01117		575.9	-41.0477	575.9	0.01117
358	-0.33296	575.8	13.3259	13.6436	-0.18731	358	0.00786	575.8	0.01012	0.01031	0.01119		575.8	-41.1218	575.8	0.01119
357	0.52473	575.7	13.5534	14.0514	-0.01805	357	0.00785	575.7	0.01014	0.01033	0.01121		575.7	-41.3835	575.7	0.01121
356	1.32125	575.6	13.696	13.5918	0.46634	356	0.00796	575.6	0.01016	0.01035	0.01122		575.6	-41.4464	575.6	0.01122
355	0.63183	575.5	13.9047	13.6687	0.58539	355	0.00802	575.5	0.01018	0.01034	0.01124		575.5	-41.7246	575.5	0.01124
354	-0.78033	575.4	14.1619	13.639	0.55409	354	0.00791	575.4	0.01019	0.01036	0.01129		575.4	-41.5564	575.4	0.01129
353	-0.75136	575.3	13.9712	13.6834	0.24867	353	0.00779	575.3	0.01016	0.01039	0.01132		575.3	-42.308	575.3	0.01132
352	-0.88408	575.2	14.4136	13.9378	0.41113	352	0.00777	575.2	0.01019	0.01041	0.01128		575.2	-42.5295	575.2	0.01128
351	0.27506	575.1	14.45	13.7758	0.40615	351	0.00766	575.1	0.01021	0.01043	0.01128		575.1	-42.5861	575.1	0.01128
350	-0.52601	575	14.3028	13.5262	-0.1938	350	0.0077	575	0.01025	0.01046	0.01125		575	-42.3591	575	0.01125
		574.9	14.3867	13.6214	-0.39125			574.9	0.01028	0.01046	0.01125		574.9	-42.4675	574.9	0.01125
		574.8	14.6608	13.9645	-0.59665			574.8	0.01033	0.01048	0.01122		574.8	-42.3851	574.8	0.01122
		574.7	14.5654	14.171	-1.04728			574.7	0.01035	0.01051	0.01124		574.7	-42.0141	574.7	0.01124
		574.6	14.8699	14.2656	-1.04409			574.6	0.01039	0.01054	0.01126		574.6	-42.2706	574.6	0.01126
		574.5	15.1594	14.8733	-1.05133			574.5	0.01043	0.01054	0.01131		574.5	-42.1392	574.5	0.01131
		574.4	14.9882	15.2091	-1.89756			574.4	0.01045	0.01056	0.01132		574.4	-42.2343	574.4	0.01132
		574.3	14.8415	15.5628	-1.61368			574.3	0.01046	0.01061	0.01135		574.3	-42.3034	574.3	0.01135
		574.2	14.6784	15.4589	-1.44276			574.2	0.01048	0.01067	0.01139		574.2	-42.5522	574.2	0.01139
		574.1	14.5676	15.9358	-1.46888			574.1	0.01049	0.01071	0.01141		574.1	-42.5515	574.1	0.01141
		574	14.4362	15.6996	-1.8933			574	0.01049	0.01074	0.01142		574	-42.4435	574	0.01142
		573.9	14.2419	15.7117	-1.53545			573.9	0.01053	0.01075	0.01143		573.9	-42.5049	573.9	0.01143
		573.8	14.6051	15.8503	-1.68384			573.8	0.01052	0.01076	0.01143		573.8	-42.4479	573.8	0.01143
		573.7	14.7181	15.9567	-0.69524			573.7	0.01053	0.01077	0.01146		573.7	-42.5818	573.7	0.01146
		573.6	14.9093	16.1209	-1.29736			573.6	0.01058	0.01083	0.01147		573.6	-42.4579	573.6	0.01147
		573.5	15.357	16.2429	-1.64755			573.5	0.01059	0.01084	0.01147		573.5	-42.8606	573.5	0.01147
		573.4	15.7839	16.2967	-1.67969			573.4	0.01063	0.01088	0.01149		573.4	-43.2511	573.4	0.01149
		573.3	16.0019	16.0018	-1.52919			573.3	0.01065	0.01089	0.01151		573.3	-43.8898	573.3	0.01151
		573.2	16.3212	16.0861	-1.06736			573.2	0.01065	0.01093	0.01151		573.2	-43.9882	573.2	0.01151
		573.1	16.0573	16.3013	-0.84589			573.1	0.01068	0.01097	0.01152		573.1	-43.7833	573.1	0.01152
		573	16.1459	16.6439	-1.31373			573	0.0107	0.011	0.01153		573	-43.5259	573	0.01153
		572.9	16.2562	17.1385	-1.24707			572.9	0.0107	0.01101	0.01155		572.9	-43.3934	572.9	0.01155
		572.8	16.3341	16.5899	-1.13011			572.8	0.01075	0.01103	0.01158		572.8	-43.9444	572.8	0.01158
		572.7	16.263	17.0975	-1.44209			572.7	0.01077	0.01103	0.01156		572.7	-43.8766	572.7	0.01156
		572.6	16.1862	17.271	-1.36507			572.6	0.01079	0.01104	0.01156		572.6	-43.6801	572.6	0.01156
		572.5	15.9267	17.4284	-1.16484			572.5	0.0108	0.01106	0.01164		572.5	-43.546	572.5	0.01164
		572.4	16.1464	17.6407	-1.55004			572.4	0.01078	0.01106	0.01168		572.4	-43.543	572.4	0.01168
		572.3	15.8988	17.6451	-1.51102			572.3	0.01076	0.01107	0.01169		572.3	-43.8472	572.3	0.01169
		572.2	16.0879	17.7337	-0.9661			572.2	0.01079	0.01106	0.0117		572.2	-44.414	572.2	0.0117
		572.1	16.1761	17.8629	-0.7919			572.1	0.01082	0.01106	0.01169		572.1	-44.465	572.1	0.01169
		572	16.4986	17.8595	-1.21281			572	0.01085	0.01106	0.01174		572	-44.2701	572	0.01174
		571.9	16.5315	17.6184	-1.19492			571.9	0.01087	0.01108	0.01175		571.9	-44.4503	571.9	0.01175
		571.8	16.4399	17.8737	-0.805			571.8	0.01089	0.01106	0.01181		571.8	-45.3918	571.8	0.01181
		571.7	16.7075	17.8731	-0.2624			571.7	0.0109	0.01109	0.01184		571.7	-45.5704	571.7	0.01184
		571.6	16.6156	17.8021	0.11573			571.6	0.01093	0.01108	0.01188		571.6	-45.5941	571.6	0.01188
		571.5	17.049	17.3155	-0.1651			571.5	0.01091	0.01107	0.0119		571.5	-46.2965	571.5	0.0119
		571.4	16.9384	16.4591	-0.8844			571.4	0.01093	0.01109	0.01193		571.4	-45.9455	571.4	0.01193
		571.3	16.7745	15.8904	-0.84398			571.3	0.01098	0.01113	0.01196		571.3	-45.9155	571.3	0.01196
		571.2	17.043	15.3182	0.0901			571.2	0.01099	0.01113	0.01196		571.2	-46.0759	571.2	0.01196
		571.1	17.2298	15.3969	-0.26003			571.1	0.01103	0.01115	0.01197		571.1	-46.1391	571.1	0.01197
		571	17.1317	15.8443	-0.16532			571	0.01103	0.01114	0.01196		571	-45.9906	571	0.01196
		570.9	17.1589	15.7413	-0.32493			570.9	0.01104	0.01115	0.01193		570.9	-46.2059	570.9	0.01193
		570.8	17.1289	15.9865	-0.44326			570.8	0.01107	0.01116	0.012		570.8	-46.1875	570.8	0.012
		570.7	17.0855	15.7884	-0.9129			570.7	0.01106	0.01117	0.01203		570.7	-46.493	570.7	0.01203
		570.6	17.2427	15.7528	-1.16144			570.6	0.01107	0.01122	0.01209		570.6	-46.7901	570.6	0.01209
		570.5	17.189	16.0532	-1.61789			570.5	0.01111	0.01123	0.01213		570.5	-47.2449	570.5	0.01213
		570.4	17.366	16.4003	-2.0196			570.4	0.01115	0.01124	0.01214		570.4	-47.2291	570.4	0.01214
		570.3	17.5107	16.3556	-1.74971			570.3	0.01118	0.01123	0.01214		570.3	-47.4933	570.3	0.01214
		570.2	17.5742	16.2263	-1.5976			570.2	0.0112	0.01124	0.01215		570.2	-47.5063	570.2	0.01215
		570.1	17.4684	16.5823	-1.41511			570.1	0.01123	0.01127	0.01221		570.1	-47.1736	570.1	0.01221
		570	17.5495	16.5411	-1.1973			570	0.01124	0.0113	0.01223		570	-47.2899	570	0.01223
		569.9	17.8171	16.7807	-1.01892			569.9	0.01128	0.01132	0.0123		569.9	-47.7173	569.9	0.0123
		569.8	17.8697	16.9059	-0.67535			569.8	0.0113	0.01137	0.0123		569.8	-48.1864	569.8	0.0123
		569.7	17.7862	16.6536	-0.71829			569.7	0.01133	0.01138	0.01232		569.7	-48.4965	569.7	0.01232
		569.6	17.9121	16.6346	-0.95111			569.6	0.01132	0.0114	0.01234		569.6	-48.9981	569.6	0.01234
		569.5	17.7186	16.3281	-0.72576			569.5	0.01135	0.01143	0.01234		569.5	-48.9305	569.5	0.01234
		569.4	17.8868	16.4535	-0.79413			569.4	0.01138	0.01145	0.01236		569.4	-49.0538	569.4	0.01236
		569.3	17.7663	16.7042	-1.24642			569.3	0.0114	0.01145	0.01236		569.3	-49.3902	569.3	0.01236
		569.2	17.7679	16.4625	-1.13402			569.2	0.0114	0.0115	0.01236		569.2	-49.8874	569.2	0.01236
		569.1	17.9384	16.4586	-0.41321			569.1	0.01146	0.01151	0.01234		569.1	-49.8713	569.1	0.01234
		569	18.1392	16.4514	-0.51195			569	0.01152	0.01154	0.01234		569	-49.8543	569	0.01234
		568.9	18.135	16.5784	-0.95227			568.9	0.01155	0.01158	0.01238		568.9	-49.619	568.9	0.01238
		568.8	18.0798	16.6289	-1.89257			568.8	0.01157	0.01162	0.0124		568.8	-49.24	568.8	0.0124
		568.7	17.7937	16.3432	-2.01173			568.7	0.01158	0.01166	0.01242		568.7	-49.429	568.7	0.01242
		568.6	18.4355	16.4504	-2.00473			568.6	0.01159	0.01169	0.01245		568.6	-49.48	568.6	0.01245
		568.5	18.6859	16.379	-1.89059			568.5	0.01162	0.01174	0.01244		568.5	-49.2891	568.5	0.01244
		568.4	18.6222	16.4577	-1.85339			568.4	0.01161	0.01177	0.01246		568.4	-49.0648	568.4	0.01246
		568.3	18.5862	16.3887	-2.20013			568.3	0.01164	0.01184	0.01247		568.3	-49.3456	568.3	0.01247
		568.2	18.4339	16.1827	-2.31994			568.2	0.01169	0.01188	0.0125		568.2	-49.3744	568.2	0.0125
		568.1	18.6551	17.2658	-2.27895			568.1	0.01172	0.01193	0.01252		568.1	-49.7468	568.1	0.01252
		568	18.74	17.8564	-1.54321			568	0.01172	0.01192	0.01256		568	-50.0882	568	0.01256
		567.9	18.9631	18.5733	-1.94087			567.9	0.01174	0.01195	0.01258		567.9	-50.3777	567.9	0.01258
		567.8	18.965	18.7842	-1.74522			567.8	0.01175	0.01197	0.0126		567.8	-50.6433	567.8	0.0126
		567.7	18.6715	18.7765	-1.56035			567.7	0.0118	0.01199	0.01259		567.7	-50.8982	567.7	0.01259
		567.6	18.975	18.8794	-1.33256			567.6	0.01186	0.01202	0.01261		567.6	-51.2051	567.6	0.01261
		567.5	19.2695	18.7743	-0.39022			567.5	0.01189	0.01204	0.01264		567.5	-50.9182	567.5	0.01264
		567.4	19.4064	18.2768	0.32504			567.4	0.01191	0.01205	0.01265		567.4	-51.4177	567.4	0.01265
		567.3	19.6982	18.4158	-0.08563			567.3	0.01195	0.01207	0.01268		567.3	-51.4936	567.3	0.01268
		567.2	19.907	18.0362	0.13364			567.2	0.01197	0.0121	0.01269		567.2	-51.4533	567.2	0.01269
		567.1	19.7707	17.4492	0.11455			567.1	0.012	0.01213	0.01271		567.1	-51.4076	567.1	0.01271
		567	19.8081	17.1302	0.21275			567	0.01199	0.01215	0.01271		567	-51.2307	567	0.01271
		566.9	19.702	17.2834	0.04803			566.9	0.01199	0.01218	0.01275		566.9	-51.6408	566.9	0.01275
		566.8	19.8545	17.5999	-0.43423			566.8	0.01199	0.0122	0.01272		566.8	-52.0659	566.8	0.01272
		566.7	19.78	17.5772	-1.38468			566.7	0.01198	0.01221	0.01275		566.7	-52.3858	566.7	0.01275
		566.6	19.422	17.2077	-1.16842			566.6	0.012	0.0122	0.01277		566.6	-52.3763	566.6	0.01277
		566.5	19.3583	17.3887	-1.34173			566.5	0.01202	0.01221	0.01281		566.5	-52.4125	566.5	0.01281
		566.4	19.3346	17.8713	-1.55591			566.4	0.01203	0.01219	0.01283		566.4	-51.989	566.4	0.01283
		566.3	19.3714	18.0928	-2.00715			566.3	0.01207	0.01222	0.01286		566.3	-51.9955	566.3	0.01286
		566.2	19.1962	18.0913	-2.06459			566.2	0.0121	0.01223	0.01287		566.2	-51.9796	566.2	0.01287
		566.1	19.8005	18.5115	-1.64225			566.1	0.01215	0.01227	0.01291		566.1	-52.2169	566.1	0.01291
		566	19.9026	18.5892	-1.14482			566	0.01218	0.01232	0.01298		566	-51.9147	566	0.01298
		565.9	20.3422	17.938	-0.5989			565.9	0.01222	0.01233	0.013		565.9	-51.916	565.9	0.013
		565.8	20.2527	18.1053	-0.33612			565.8	0.01227	0.01237	0.01301		565.8	-52.2137	565.8	0.01301
		565.7	20.1244	18.282	-0.58455			565.7	0.01228	0.01239	0.01305		565.7	-52.4847	565.7	0.01305
		565.6	20.2206	18.5826	-0.51622			565.6	0.01228	0.01241	0.0131		565.6	-53.2028	565.6	0.0131
		565.5	20.2911	18.171	0.20154			565.5	0.01229	0.01244	0.01311		565.5	-53.8406	565.5	0.01311
		565.4	20.192	18.4844	0.41552			565.4	0.01229	0.01245	0.01314		565.4	-54.1436	565.4	0.01314
		565.3	20.4181	18.7381	0.74471			565.3	0.01231	0.01247	0.01315		565.3	-54.5755	565.3	0.01315
		565.2	20.2616	19.278	0.8337			565.2	0.0123	0.01252	0.01317		565.2	-54.8772	565.2	0.01317
		565.1	20.3615	19.6046	0.4412			565.1	0.01231	0.01255	0.0132		565.1	-55.4257	565.1	0.0132
		565	20.5678	19.3209	0.5042			565	0.01234	0.01258	0.01323		565	-55.8664	565	0.01323
		564.9	20.5924	19.3281	0.82477			564.9	0.01238	0.0126	0.01325		564.9	-56.0641	564.9	0.01325
		564.8	20.9193	19.9368	1.20917			564.8	0.01238	0.01261	0.01326		564.8	-55.7158	564.8	0.01326
		564.7	20.7626	19.8091	0.81089			564.7	0.0124	0.01262	0.01327		564.7	-56.496	564.7	0.01327
		564.6	20.1662	19.9171	0.54786			564.6	0.01242	0.01264	0.01333		564.6	-56.4648	564.6	0.01333
		564.5	20.2695	19.7621	0.33958			564.5	0.01244	0.01269	0.01339		564.5	-56.2162	564.5	0.01339
		564.4	20.1134	19.6242	0.04708			564.4	0.01248	0.01272	0.01345		564.4	-56.3763	564.4	0.01345
		564.3	20.1383	19.6027	0.6788			564.3	0.01248	0.01276	0.01345		564.3	-57.0804	564.3	0.01345
		564.2	20.1868	19.3918	0.84319			564.2	0.01249	0.01277	0.01348		564.2	-58.1225	564.2	0.01348
		564.1	20.2325	20.0063	0.70959			564.1	0.01251	0.01283	0.01351		564.1	-58.3293	564.1	0.01351
		564	20.0235	20.4647	1.43777			564	0.01251	0.01284	0.01353		564	-58.2334	564	0.01353
		563.9	19.8329	20.9515	1.63331			563.9	0.01253	0.01286	0.01356		563.9	-59.0368	563.9	0.01356
		563.8	19.9178	21.6068	1.44649			563.8	0.01257	0.01289	0.01354		563.8	-59.2364	563.8	0.01354
		563.7	20.6586	21.8131	1.77042			563.7	0.01258	0.01293	0.01357		563.7	-59.7049	563.7	0.01357
		563.6	20.2183	22.3956	2.02339			563.6	0.01259	0.01295	0.01359		563.6	-59.8226	563.6	0.01359
		563.5	19.7956	22.0276	2.43042			563.5	0.01262	0.01299	0.01367		563.5	-60.3772	563.5	0.01367
		563.4	19.6917	21.4331	2.28923			563.4	0.01268	0.01303	0.01372		563.4	-60.2273	563.4	0.01372
		563.3	19.8758	21.2137	2.57399			563.3	0.01273	0.01308	0.0137		563.3	-60.9826	563.3	0.0137
		563.2	20.3503	21.3402	2.37375			563.2	0.01275	0.01311	0.0137		563.2	-61.2031	563.2	0.0137
		563.1	20.8688	21.4561	2.30571			563.1	0.01277	0.01317	0.01373		563.1	-61.3923	563.1	0.01373
		563	20.7628	21.6819	2.85412			563	0.01276	0.01322	0.01377		563	-62.4397	563	0.01377
		562.9	21.2915	21.5918	2.94185			562.9	0.0128	0.01325	0.01383		562.9	-62.2667	562.9	0.01383
		562.8	21.3605	21.949	2.66985			562.8	0.01279	0.01327	0.01388		562.8	-62.5484	562.8	0.01388
		562.7	21.4584	21.7988	2.48799			562.7	0.0128	0.0133	0.01387		562.7	-63.3281	562.7	0.01387
		562.6	21.6956	22.5002	2.31778			562.6	0.01278	0.01331	0.01389		562.6	-63.5713	562.6	0.01389
		562.5	21.5814	22.3638	1.33682			562.5	0.01282	0.01333	0.01394		562.5	-64.1589	562.5	0.01394
		562.4	21.7039	22.5777	1.44659			562.4	0.01282	0.01337	0.01399		562.4	-64.1292	562.4	0.01399
		562.3	22.0123	22.2593	1.5315			562.3	0.01283	0.01342	0.014		562.3	-64.2884	562.3	0.014
		562.2	21.8464	22.8468	1.49594			562.2	0.01286	0.01342	0.01404		562.2	-64.1182	562.2	0.01404
		562.1	22.4742	22.5267	1.88745			562.1	0.01293	0.01346	0.01406		562.1	-64.3674	562.1	0.01406
		562	22.5096	22.8916	2.01743			562	0.01299	0.01346	0.0141		562	-64.544	562	0.0141
		561.9	22.2952	22.3631	1.8757			561.9	0.01302	0.01347	0.01413		561.9	-64.6496	561.9	0.01413
		561.8	22.0882	22.1493	2.25754			561.8	0.01305	0.01345	0.01415		561.8	-64.8298	561.8	0.01415
		561.7	21.9233	22.4142	2.24671			561.7	0.01308	0.01347	0.01416		561.7	-65.1262	561.7	0.01416
		561.6	21.849	22.2836	2.05386			561.6	0.01307	0.01349	0.01416		561.6	-65.1842	561.6	0.01416
		561.5	21.6005	21.6993	1.58979			561.5	0.01312	0.01349	0.0142		561.5	-65.2406	561.5	0.0142
		561.4	21.8079	21.1406	1.91962			561.4	0.01317	0.01352	0.01418		561.4	-65.6412	561.4	0.01418
		561.3	22.329	21.3716	1.80821			561.3	0.01321	0.01356	0.01416		561.3	-66.5802	561.3	0.01416
		561.2	22.6594	21.7889	1.97586			561.2	0.01324	0.01355	0.01418		561.2	-67.3253	561.2	0.01418
		561.1	23.07	21.9581	2.28087			561.1	0.01326	0.01354	0.01422		561.1	-67.3596	561.1	0.01422
		561	23.1058	22.0855	2.23682			561	0.01328	0.01356	0.01429		561	-67.1641	561	0.01429
		560.9	22.7888	22.3137	1.22564			560.9	0.01329	0.01361	0.01433		560.9	-67.2198	560.9	0.01433
		560.8	22.9406	22.1066	0.97737			560.8	0.01334	0.01362	0.01437		560.8	-67.7982	560.8	0.01437
		560.7	23.286	22.0817	1.03235			560.7	0.01335	0.01364	0.01439		560.7	-68.1297	560.7	0.01439
		560.6	23.4665	21.9457	0.55685			560.6	0.01336	0.01368	0.01445		560.6	-68.5071	560.6	0.01445
		560.5	23.2544	22.0189	0.55241			560.5	0.01341	0.0137	0.01453		560.5	-68.2691	560.5	0.01453
		560.4	22.9958	22.4011	0.28988			560.4	0.01348	0.01372	0.01456		560.4	-68.5156	560.4	0.01456
		560.3	23.8329	22.6347	0.19555			560.3	0.01353	0.01373	0.01458		560.3	-68.5985	560.3	0.01458
		560.2	24.2911	22.865	0.11378			560.2	0.0136	0.01377	0.01459		560.2	-68.3856	560.2	0.01459
		560.1	24.4518	23.625	-0.19936			560.1	0.01365	0.01379	0.01463		560.1	-68.5215	560.1	0.01463
		560	24.2703	23.7919	-0.37526			560	0.01367	0.01377	0.01468		560	-68.7608	560	0.01468
		559.9	24.2333	23.8119	-0.45054			559.9	0.01369	0.0138	0.01469		559.9	-69.0277	559.9	0.01469
		559.8	24.1696	23.6516	-0.65887			559.8	0.01374	0.01385	0.01472		559.8	-69.459	559.8	0.01472
		559.7	24.0459	23.0752	-0.70527			559.7	0.01371	0.01385	0.01473		559.7	-69.7579	559.7	0.01473
		559.6	23.8413	23.2994	-0.22451			559.6	0.01374	0.01387	0.01475		559.6	-69.8796	559.6	0.01475
		559.5	23.83	23.328	0.08106			559.5	0.01377	0.01389	0.01476		559.5	-70.4644	559.5	0.01476
		559.4	24.02	23.4275	0.06768			559.4	0.0138	0.01392	0.01482		559.4	-70.1316	559.4	0.01482
		559.3	23.8532	23.3863	0.15095			559.3	0.01386	0.01393	0.0148		559.3	-70.635	559.3	0.0148
		559.2	23.9434	24.0653	0.58088			559.2	0.01387	0.01398	0.01481		559.2	-70.9118	559.2	0.01481
		559.1	24.2077	24.3393	0.58805			559.1	0.01392	0.014	0.01483		559.1	-71.3794	559.1	0.01483
		559	24.3611	24.4958	1.42417			559	0.01397	0.01403	0.01486		559	-71.5377	559	0.01486
		558.9	24.1234	24.1168	1.08813			558.9	0.01397	0.01409	0.0149		558.9	-71.8438	558.9	0.0149
		558.8	24.1273	24.0891	0.20868			558.8	0.01396	0.01411	0.01492		558.8	-71.7504	558.8	0.01492
		558.7	24.3172	24.4101	-0.04649			558.7	0.01398	0.01416	0.01494		558.7	-72.4186	558.7	0.01494
		558.6	24.1417	24.6376	0.38689			558.6	0.01399	0.01421	0.01499		558.6	-72.5242	558.6	0.01499
		558.5	23.6099	24.9165	-0.3015			558.5	0.01401	0.01425	0.01499		558.5	-73.125	558.5	0.01499
		558.4	23.7048	25.1628	0.57966			558.4	0.01405	0.01425	0.01503		558.4	-73.7389	558.4	0.01503
		558.3	24.1617	25.3852	0.16055			558.3	0.01407	0.01425	0.0151		558.3	-74.0938	558.3	0.0151
		558.2	24.1823	26.0772	0.0847			558.2	0.01407	0.01427	0.01515		558.2	-74.6677	558.2	0.01515
		558.1	24.0532	26.0543	0.53002			558.1	0.01407	0.0143	0.01518		558.1	-74.6161	558.1	0.01518
		558	24.0834	26.1934	0.99322			558	0.01405	0.01432	0.01522		558	-74.8026	558	0.01522
		557.9	24.0358	25.6069	0.45533			557.9	0.01407	0.01437	0.01525		557.9	-75.1961	557.9	0.01525
		557.8	23.9003	25.6499	0.32678			557.8	0.01409	0.01442	0.01528		557.8	-75.6785	557.8	0.01528
		557.7	23.9581	25.9539	-0.68391			557.7	0.01412	0.01448	0.0153		557.7	-75.6942	557.7	0.0153
		557.6	24.0177	25.6027	-0.40103			557.6	0.01411	0.01452	0.01534		557.6	-75.7984	557.6	0.01534
		557.5	24.173	26.2065	-0.29005			557.5	0.01417	0.01455	0.01536		557.5	-75.532	557.5	0.01536
		557.4	24.202	26.3283	-0.11646			557.4	0.01416	0.0146	0.01538		557.4	-75.4595	557.4	0.01538
		557.3	24.62	26.0043	-0.14407			557.3	0.01419	0.01462	0.01536		557.3	-75.6274	557.3	0.01536
		557.2	25.0637	25.9437	0.37632			557.2	0.01422	0.01465	0.01538		557.2	-76.3813	557.2	0.01538
		557.1	24.9505	26.1151	0.14358			557.1	0.01425	0.01466	0.01539		557.1	-76.4473	557.1	0.01539
		557	24.857	26.1565	-0.28934			557	0.01426	0.01469	0.01544		557	-77.0744	557	0.01544
		556.9	24.5678	26.1448	0.11396			556.9	0.01424	0.01471	0.01549		556.9	-77.7314	556.9	0.01549
		556.8	24.4903	26.1278	0.36144			556.8	0.01423	0.01471	0.01552		556.8	-78.274	556.8	0.01552
		556.7	24.7561	25.8393	0.28173			556.7	0.01428	0.01473	0.01554		556.7	-78.6538	556.7	0.01554
		556.6	24.8698	26.2203	0.57741			556.6	0.01432	0.01475	0.01556		556.6	-78.4915	556.6	0.01556
		556.5	25.0919	25.7903	-0.02771			556.5	0.01434	0.01476	0.0156		556.5	-78.6635	556.5	0.0156
		556.4	25.4281	25.8489	-0.33678			556.4	0.01442	0.0148	0.01564		556.4	-78.7939	556.4	0.01564
		556.3	25.2699	26.1766	-0.38808			556.3	0.01444	0.01482	0.01565		556.3	-79.4979	556.3	0.01565
		556.2	25.2125	25.7197	-1.26534			556.2	0.01449	0.01487	0.0157		556.2	-80.1894	556.2	0.0157
		556.1	25.3363	25.6029	-1.31361			556.1	0.0145	0.0149	0.01575		556.1	-80.5878	556.1	0.01575
		556	25.728	26.1001	-1.57177			556	0.01453	0.01493	0.01575		556	-80.4908	556	0.01575
		555.9	25.6013	26.0111	-1.41256			555.9	0.01457	0.01495	0.01576		555.9	-80.6072	555.9	0.01576
		555.8	25.5524	26.0576	-1.34747			555.8	0.01459	0.015	0.01581		555.8	-81.0107	555.8	0.01581
		555.7	25.4296	25.6695	-2.56555			555.7	0.01462	0.01504	0.01587		555.7	-81.1377	555.7	0.01587
		555.6	25.5305	25.8391	-2.38468			555.6	0.01466	0.01501	0.01591		555.6	-82.0625	555.6	0.01591
		555.5	25.4133	25.6775	-2.07963			555.5	0.01469	0.01502	0.01596		555.5	-82.2984	555.5	0.01596
		555.4	25.0922	25.4003	-1.90382			555.4	0.01472	0.01507	0.01601		555.4	-82.3758	555.4	0.01601
		555.3	25.5965	25.26	-1.85565			555.3	0.01476	0.01511	0.01603		555.3	-82.7023	555.3	0.01603
		555.2	25.8539	24.7544	-1.49763			555.2	0.01478	0.01515	0.01609		555.2	-82.7563	555.2	0.01609
		555.1	26.3953	24.6842	-2.16743			555.1	0.0148	0.01522	0.01613		555.1	-82.5695	555.1	0.01613
		555	26.485	25.1327	-1.75881			555	0.01484	0.01529	0.01616		555	-82.8473	555	0.01616
		554.9	26.0367	24.6759	-1.39524			554.9	0.01484	0.01534	0.01618		554.9	-82.4199	554.9	0.01618
		554.8	26.608	25.1463	-2.10522			554.8	0.01488	0.01537	0.01624		554.8	-83.0143	554.8	0.01624
		554.7	26.2657	25.2408	-2.41925			554.7	0.01494	0.0154	0.01626		554.7	-82.9131	554.7	0.01626
		554.6	26.446	25.9032	-2.58451			554.6	0.01497	0.01541	0.01628		554.6	-82.8332	554.6	0.01628
		554.5	26.7495	25.9186	-2.86118			554.5	0.015	0.01544	0.01627		554.5	-82.7455	554.5	0.01627
		554.4	26.7643	25.9704	-2.80401			554.4	0.01503	0.01544	0.01631		554.4	-82.7689	554.4	0.01631
		554.3	26.5853	26.2076	-2.0115			554.3	0.0151	0.01546	0.01631		554.3	-82.8273	554.3	0.01631
		554.2	26.4678	25.8127	-2.28086			554.2	0.01512	0.01547	0.01634		554.2	-83.733	554.2	0.01634
		554.1	27.0653	25.7029	-2.59587			554.1	0.01515	0.01553	0.01636		554.1	-84.5068	554.1	0.01636
		554	26.5282	25.7166	-3.16225			554	0.01522	0.01558	0.01643		554	-84.9944	554	0.01643
		553.9	25.9841	25.8268	-3.01724			553.9	0.01521	0.01561	0.01646		553.9	-85.3077	553.9	0.01646
		553.8	26.2547	25.026	-2.67738			553.8	0.01522	0.01563	0.01649		553.8	-85.4426	553.8	0.01649
		553.7	26.1671	25.2152	-2.62277			553.7	0.01524	0.01565	0.01646		553.7	-85.9101	553.7	0.01646
		553.6	25.9115	25.4616	-2.34674			553.6	0.01529	0.01571	0.01647		553.6	-85.8925	553.6	0.01647
		553.5	25.9321	26.0562	-2.18166			553.5	0.0153	0.01573	0.0165		553.5	-85.8395	553.5	0.0165
		553.4	25.7006	26.27	-2.30777			553.4	0.01532	0.01579	0.01651		553.4	-86.0455	553.4	0.01651
		553.3	25.8429	26.4592	-3.15281			553.3	0.01535	0.01583	0.01656		553.3	-86.1784	553.3	0.01656
		553.2	26.0237	26.9842	-2.46576			553.2	0.0154	0.01584	0.01656		553.2	-86.3654	553.2	0.01656
		553.1	25.9571	27.3702	-1.55543			553.1	0.01544	0.01587	0.01661		553.1	-86.3956	553.1	0.01661
		553	26.0213	27.5331	-1.59558			553	0.01546	0.01592	0.01662		553	-85.5474	553	0.01662
		552.9	25.816	28.2969	-0.56373			552.9	0.01548	0.01594	0.01665		552.9	-85.8515	552.9	0.01665
		552.8	25.6777	28.5231	-0.12825			552.8	0.0155	0.01598	0.01669		552.8	-86.4825	552.8	0.01669
		552.7	26.0297	28.7083	-0.25002			552.7	0.01554	0.01601	0.01673		552.7	-86.9357	552.7	0.01673
		552.6	26.1752	28.4844	0.10826			552.6	0.01555	0.01604	0.01682		552.6	-87.3661	552.6	0.01682
		552.5	26.3669	28.6268	-0.52892			552.5	0.01556	0.0161	0.01687		552.5	-87.6498	552.5	0.01687
		552.4	26.8641	28.8108	0.47428			552.4	0.01557	0.01617	0.01688		552.4	-88.3942	552.4	0.01688
		552.3	26.9935	29.429	0.10998			552.3	0.01558	0.01624	0.0169		552.3	-87.7351	552.3	0.0169
		552.2	27.3815	29.7984	0.72661			552.2	0.01561	0.01628	0.01692		552.2	-88.5284	552.2	0.01692
		552.1	27.6081	30.0021	1.01624			552.1	0.01562	0.01628	0.01697		552.1	-88.5579	552.1	0.01697
		552	27.691	30.9762	0.57906			552	0.01564	0.01629	0.01698		552	-88.7496	552	0.01698
		551.9	27.9329	30.871	0.30648			551.9	0.01569	0.01633	0.017		551.9	-88.602	551.9	0.017
		551.8	27.8854	31.2492	0.65739			551.8	0.01573	0.01634	0.01702		551.8	-89.1086	551.8	0.01702
		551.7	27.8016	31.1956	0.82333			551.7	0.01575	0.01639	0.01705		551.7	-89.0498	551.7	0.01705
		551.6	27.9616	31.7557	0.91572			551.6	0.01583	0.01644	0.01709		551.6	-90.3217	551.6	0.01709
		551.5	27.8657	31.6496	2.03463			551.5	0.01584	0.01652	0.01709		551.5	-90.2115	551.5	0.01709
		551.4	28.0279	31.546	2.27591			551.4	0.01589	0.01657	0.01712		551.4	-90.2767	551.4	0.01712
		551.3	28.0377	31.5663	2.78304			551.3	0.01594	0.01663	0.01716		551.3	-90.4098	551.3	0.01716
		551.2	28.2109	31.6132	3.25602			551.2	0.01597	0.01664	0.01721		551.2	-90.3893	551.2	0.01721
		551.1	28.5128	31.9483	4.26923			551.1	0.01599	0.01663	0.01724		551.1	-91.3725	551.1	0.01724
		551	28.857	32.2057	3.76328			551	0.01602	0.01667	0.0173		551	-91.6234	551	0.0173
		550.9	29.2281	32.668	3.55509			550.9	0.01604	0.01673	0.01733		550.9	-91.8904	550.9	0.01733
		550.8	28.6697	32.6637	3.95385			550.8	0.0161	0.01675	0.01739		550.8	-91.894	550.8	0.01739
		550.7	29.1843	33.1922	4.19162			550.7	0.01614	0.01677	0.01743		550.7	-91.9412	550.7	0.01743
		550.6	29.4122	33.0036	3.75042			550.6	0.01618	0.01681	0.01747		550.6	-92.141	550.6	0.01747
		550.5	29.4247	34.0193	3.46531			550.5	0.0162	0.01684	0.01753		550.5	-92.653	550.5	0.01753
		550.4	29.8392	33.705	3.68511			550.4	0.01626	0.01691	0.01761		550.4	-92.9271	550.4	0.01761
		550.3	30.6476	33.7146	3.61303			550.3	0.0163	0.01692	0.01767		550.3	-93.2646	550.3	0.01767
		550.2	30.7735	33.1754	3.46104			550.2	0.01636	0.01699	0.01774		550.2	-93.7533	550.2	0.01774
		550.1	30.9103	33.2696	3.81762			550.1	0.01637	0.01707	0.01775		550.1	-94.1279	550.1	0.01775
		550	30.9286	32.4265	4.49837			550	0.01641	0.0171	0.01779		550	-95.1898	550	0.01779
		549.9	30.9607	32.5106	4.2246			549.9	0.01642	0.01714	0.01783		549.9	-95.038	549.9	0.01783
		549.8	31.2753	32.3098	3.61394			549.8	0.01644	0.0172	0.01786		549.8	-95.4414	549.8	0.01786
		549.7	31.6786	32.5009	2.95021			549.7	0.01646	0.01726	0.0179		549.7	-96.9896	549.7	0.0179
		549.6	31.9555	32.6661	2.48208			549.6	0.01652	0.01731	0.01791		549.6	-96.9692	549.6	0.01791
		549.5	31.6627	32.2333	2.55827			549.5	0.01654	0.01733	0.01793		549.5	-96.687	549.5	0.01793
		549.4	31.7944	32.005	2.03862			549.4	0.01656	0.01739	0.01795		549.4	-97.7758	549.4	0.01795
		549.3	31.5769	31.7501	2.33826			549.3	0.01663	0.01741	0.01799		549.3	-98.083	549.3	0.01799
		549.2	31.5456	32.0469	1.90907			549.2	0.01668	0.01747	0.01803		549.2	-98.1643	549.2	0.01803
		549.1	31.5764	32.3468	1.36948			549.1	0.01673	0.01749	0.01804		549.1	-98.3538	549.1	0.01804
		549	31.6442	32.6105	1.78207			549	0.01679	0.01751	0.01809		549	-99.0741	549	0.01809
		548.9	31.7036	32.8512	1.19811			548.9	0.01685	0.01755	0.0181		548.9	-99.1033	548.9	0.0181
		548.8	31.8513	32.8982	0.46371			548.8	0.01689	0.01758	0.01814		548.8	-99.7481	548.8	0.01814
		548.7	32.0545	33.35	0.42393			548.7	0.01693	0.01765	0.01824		548.7	-100.098	548.7	0.01824
		548.6	32.6652	33.6847	-0.34392			548.6	0.01698	0.01771	0.01828		548.6	-100.694	548.6	0.01828
		548.5	32.8645	33.2865	0.1666			548.5	0.01702	0.01775	0.01833		548.5	-100.581	548.5	0.01833
		548.4	33.1384	33.5239	-0.30112			548.4	0.01702	0.01774	0.01837		548.4	-100.766	548.4	0.01837
		548.3	33.2195	33.1	-0.00613			548.3	0.01703	0.01773	0.01841		548.3	-101.078	548.3	0.01841
		548.2	33.4215	33.5751	-0.33914			548.2	0.01706	0.01775	0.01848		548.2	-102.191	548.2	0.01848
		548.1	34.111	33.8853	-0.33411			548.1	0.01706	0.01781	0.01851		548.1	-102.674	548.1	0.01851
		548	34.0014	33.9522	-0.18257			548	0.01708	0.01784	0.01855		548	-103.764	548	0.01855
		547.9	33.7853	34.173	-1.03419			547.9	0.01711	0.01792	0.01859		547.9	-104.755	547.9	0.01859
		547.8	33.8793	34.034	-1.64748			547.8	0.01715	0.01796	0.01862		547.8	-105.019	547.8	0.01862
		547.7	34.2437	33.7047	-0.72844			547.7	0.01719	0.018	0.01863		547.7	-105.418	547.7	0.01863
		547.6	34.241	33.6382	-0.811			547.6	0.01726	0.01801	0.01869		547.6	-105.789	547.6	0.01869
		547.5	34.5732	34.2658	-1.03852			547.5	0.01727	0.01804	0.01871		547.5	-106.593	547.5	0.01871
		547.4	34.9333	34.719	-0.75637			547.4	0.0173	0.01809	0.01875		547.4	-106.968	547.4	0.01875
		547.3	34.8487	34.833	-0.73375			547.3	0.01734	0.01812	0.01881		547.3	-107.893	547.3	0.01881
		547.2	35.4144	35.0748	-0.80106			547.2	0.01739	0.01812	0.01882		547.2	-108.206	547.2	0.01882
		547.1	35.2726	35.5899	-0.66481			547.1	0.01743	0.01815	0.01883		547.1	-108.713	547.1	0.01883
		547	34.9446	36.0133	-0.05316			547	0.01744	0.01821	0.0189		547	-109.434	547	0.0189
		546.9	35.3089	36.5113	-0.25597			546.9	0.01747	0.01825	0.01893		546.9	-109.718	546.9	0.01893
		546.8	35.0369	37.1202	-0.92328			546.8	0.01751	0.01828	0.01898		546.8	-109.259	546.8	0.01898
		546.7	34.9106	37.4645	-1.8899			546.7	0.01754	0.01837	0.01903		546.7	-109.829	546.7	0.01903
		546.6	35.0175	37.8838	-1.97875			546.6	0.01756	0.01841	0.01906		546.6	-110.408	546.6	0.01906
		546.5	35.6478	37.5081	-2.0125			546.5	0.01761	0.01844	0.0191		546.5	-111.073	546.5	0.0191
		546.4	34.768	37.6777	-2.00682			546.4	0.01764	0.01849	0.01915		546.4	-110.924	546.4	0.01915
		546.3	35.1004	37.4839	-2.05678			546.3	0.01766	0.0185	0.01922		546.3	-111.296	546.3	0.01922
		546.2	35.2176	37.7028	-2.33069			546.2	0.01773	0.01855	0.01925		546.2	-111.807	546.2	0.01925
		546.1	35.8422	38.0457	-2.06871			546.1	0.01778	0.01858	0.01929		546.1	-112.307	546.1	0.01929
		546	35.8426	38.4557	-2.34988			546	0.01782	0.01858	0.01934		546	-113.37	546	0.01934
		545.9	36.5075	38.5257	-1.99889			545.9	0.01784	0.01859	0.01938		545.9	-113.863	545.9	0.01938
		545.8	36.7251	38.6299	-2.08431			545.8	0.01789	0.01863	0.01944		545.8	-114.233	545.8	0.01944
		545.7	37.0564	38.303	-1.85139			545.7	0.01791	0.01869	0.01946		545.7	-114.878	545.7	0.01946
		545.6	37.0084	37.9264	-1.70914			545.6	0.01791	0.01879	0.01953		545.6	-115.357	545.6	0.01953
		545.5	36.7724	37.389	-0.42338			545.5	0.01793	0.0188	0.01956		545.5	-116.217	545.5	0.01956
		545.4	36.4886	37.4758	0.08398			545.4	0.01795	0.01882	0.01959		545.4	-116.576	545.4	0.01959
		545.3	36.6188	37.9802	0.61078			545.3	0.01801	0.01886	0.01965		545.3	-117.664	545.3	0.01965
		545.2	36.9845	37.8292	0.06389			545.2	0.01802	0.0189	0.01972		545.2	-117.991	545.2	0.01972
		545.1	36.8169	38.0623	-0.48219			545.1	0.01808	0.01898	0.01977		545.1	-118.153	545.1	0.01977
		545	37.1205	38.0035	-0.52268			545	0.01813	0.019	0.01981		545	-118.335	545	0.01981
		544.9	37.2484	38.4157	-0.42403			544.9	0.01818	0.01906	0.01985		544.9	-117.831	544.9	0.01985
		544.8	36.9692	38.3089	-1.17538			544.8	0.01824	0.0191	0.01991		544.8	-118.06	544.8	0.01991
		544.7	37.1888	38.7872	-1.42153			544.7	0.01829	0.01913	0.01996		544.7	-117.828	544.7	0.01996
		544.6	37.5603	38.409	-0.73542			544.6	0.01836	0.01922	0.02002		544.6	-118.134	544.6	0.02002
		544.5	36.4033	38.874	-0.67846			544.5	0.0184	0.01927	0.02004		544.5	-118.288	544.5	0.02004
		544.4	36.9827	38.8979	-0.8902			544.4	0.01843	0.0193	0.02009		544.4	-118.702	544.4	0.02009
		544.3	36.9238	38.8269	-0.7862			544.3	0.01845	0.01937	0.02015		544.3	-118.972	544.3	0.02015
		544.2	36.6099	38.7553	-0.51957			544.2	0.0185	0.01941	0.02021		544.2	-119.731	544.2	0.02021
		544.1	36.4331	39.5245	-0.34976			544.1	0.01852	0.0195	0.02025		544.1	-119.42	544.1	0.02025
		544	36.9609	39.1996	-0.40729			544	0.01852	0.01955	0.02032		544	-119.972	544	0.02032
		543.9	37.0261	39.0588	-0.83677			543.9	0.01854	0.01965	0.02037		543.9	-120.458	543.9	0.02037
		543.8	37.6664	39.239	-1.013			543.8	0.01858	0.01969	0.02041		543.8	-120.284	543.8	0.02041
		543.7	37.712	39.3063	-1.31653			543.7	0.0186	0.01972	0.02048		543.7	-120.289	543.7	0.02048
		543.6	38.1744	39.4483	-1.93328			543.6	0.01865	0.01975	0.02051		543.6	-120.949	543.6	0.02051
		543.5	38.389	39.3651	-1.03903			543.5	0.01871	0.01978	0.02057		543.5	-121.808	543.5	0.02057
		543.4	38.8406	39.9711	-0.30653			543.4	0.01876	0.01979	0.02065		543.4	-122.273	543.4	0.02065
		543.3	38.7115	39.9	-0.3047			543.3	0.0188	0.01981	0.02069		543.3	-122.512	543.3	0.02069
		543.2	39.0955	40.2525	0.81099			543.2	0.01887	0.01983	0.02076		543.2	-123	543.2	0.02076
		543.1	39.7355	39.8938	0.92091			543.1	0.01893	0.01988	0.02077		543.1	-123.557	543.1	0.02077
		543	39.8888	40.3057	1.32439			543	0.01897	0.01994	0.02083		543	-124.4	543	0.02083
		542.9	40.113	40.6199	1.20922			542.9	0.01903	0.01999	0.02086		542.9	-124.715	542.9	0.02086
		542.8	39.7057	40.7288	0.9722			542.8	0.01907	0.02002	0.02091		542.8	-124.183	542.8	0.02091
		542.7	40.0025	40.6183	1.71473			542.7	0.01908	0.0201	0.02093		542.7	-124.066	542.7	0.02093
		542.6	39.9368	40.5671	1.77838			542.6	0.01916	0.02019	0.02098		542.6	-124.111	542.6	0.02098
		542.5	39.5876	40.7708	1.89811			542.5	0.01918	0.02022	0.02102		542.5	-124.356	542.5	0.02102
		542.4	39.1707	40.9971	2.33102			542.4	0.01921	0.02028	0.02105		542.4	-124.413	542.4	0.02105
		542.3	39.4328	41.382	2.83655			542.3	0.01927	0.02032	0.02109		542.3	-124.698	542.3	0.02109
		542.2	40.1854	41.9951	2.77102			542.2	0.01933	0.02038	0.02116		542.2	-124.856	542.2	0.02116
		542.1	40.3435	41.972	2.68719			542.1	0.0194	0.02041	0.02117		542.1	-125.871	542.1	0.02117
		542	40.5432	41.7045	2.77846			542	0.01942	0.02048	0.02121		542	-126.337	542	0.02121
		541.9	40.4328	42.048	2.91617			541.9	0.01947	0.02054	0.02121		541.9	-127.267	541.9	0.02121
		541.8	41.0505	41.9313	2.9501			541.8	0.01954	0.02056	0.02124		541.8	-127.899	541.8	0.02124
		541.7	40.9006	42.1793	2.89347			541.7	0.0196	0.02063	0.02129		541.7	-128.369	541.7	0.02129
		541.6	40.8932	41.7738	3.0226			541.6	0.01966	0.02068	0.02133		541.6	-129.076	541.6	0.02133
		541.5	41.3194	41.7922	3.1406			541.5	0.01969	0.02072	0.02138		541.5	-129.628	541.5	0.02138
		541.4	41.6332	41.547	3.17281			541.4	0.01976	0.02075	0.0214		541.4	-130.397	541.4	0.0214
		541.3	41.7081	41.8094	3.12016			541.3	0.01979	0.02081	0.02149		541.3	-131.283	541.3	0.02149
		541.2	42.7937	41.7636	1.67891			541.2	0.01982	0.02082	0.02155		541.2	-131.465	541.2	0.02155
		541.1	42.8062	41.733	1.36421			541.1	0.01986	0.02089	0.02162		541.1	-131.507	541.1	0.02162
		541	43.0384	42.0457	2.13341			541	0.01991	0.02095	0.02168		541	-131.543	541	0.02168
		540.9	43.3935	41.9952	2.13017			540.9	0.01995	0.021	0.02168		540.9	-131.963	540.9	0.02168
		540.8	43.4037	42.3682	2.13374			540.8	0.02	0.02105	0.02172		540.8	-131.965	540.8	0.02172
		540.7	43.6142	42.0424	2.78673			540.7	0.02005	0.02111	0.02173		540.7	-132.416	540.7	0.02173
		540.6	43.0838	41.8599	3.25938			540.6	0.0201	0.02114	0.02174		540.6	-132.287	540.6	0.02174
		540.5	43.2743	41.5895	3.15811			540.5	0.02014	0.02115	0.02181		540.5	-132.751	540.5	0.02181
		540.4	43.4637	41.207	3.25363			540.4	0.02018	0.02118	0.02182		540.4	-133.718	540.4	0.02182
		540.3	43.6951	41.5616	3.16919			540.3	0.02025	0.02122	0.02181		540.3	-135.037	540.3	0.02181
		540.2	42.7637	41.5413	3.41593			540.2	0.0203	0.02129	0.02188		540.2	-135.3	540.2	0.02188
		540.1	43.0046	41.5609	2.56807			540.1	0.02034	0.02135	0.02191		540.1	-136.054	540.1	0.02191
		540	43.2052	41.5444	2.43641			540	0.02038	0.02139	0.02194		540	-135.897	540	0.02194
		539.9	42.2311	41.7576	1.8701			539.9	0.02043	0.02145	0.022		539.9	-136.287	539.9	0.022
		539.8	41.9762	42.1633	1.60184			539.8	0.02048	0.02152	0.02206		539.8	-136.664	539.8	0.02206
		539.7	42.0203	42.4663	1.51757			539.7	0.02051	0.02153	0.02212		539.7	-137.146	539.7	0.02212
		539.6	42.0288	42.1095	1.44013			539.6	0.02056	0.0216	0.02217		539.6	-137.519	539.6	0.02217
		539.5	42.4496	42.3007	1.66286			539.5	0.0206	0.02161	0.02221		539.5	-137.655	539.5	0.02221
		539.4	42.575	42.3071	1.27323			539.4	0.02068	0.02167	0.02225		539.4	-138.781	539.4	0.02225
		539.3	42.8245	41.7114	0.68901			539.3	0.02072	0.02166	0.02228		539.3	-139.216	539.3	0.02228
		539.2	42.8807	41.7386	0.88189			539.2	0.02079	0.02171	0.02232		539.2	-139.619	539.2	0.02232
		539.1	43.6048	42.027	0.2254			539.1	0.02085	0.02177	0.02238		539.1	-139.446	539.1	0.02238
		539	43.9437	42.3253	-0.04942			539	0.02092	0.02176	0.02242		539	-139.681	539	0.02242
		538.9	43.6805	41.64	-0.5023			538.9	0.02095	0.02178	0.0225		538.9	-140.604	538.9	0.0225
		538.8	43.4558	42.4142	-1.25897			538.8	0.02101	0.02185	0.02256		538.8	-140.557	538.8	0.02256
		538.7	43.6608	43.0233	-1.31819			538.7	0.02104	0.02192	0.02265		538.7	-140.807	538.7	0.02265
		538.6	43.458	43.3203	-1.09013			538.6	0.0211	0.02195	0.02273		538.6	-140.837	538.6	0.02273
		538.5	43.8741	43.6094	-1.66494			538.5	0.02115	0.02203	0.02279		538.5	-140.73	538.5	0.02279
		538.4	44.1007	44.2397	-1.15947			538.4	0.02118	0.02214	0.02287		538.4	-140.874	538.4	0.02287
		538.3	44.2289	44.5299	-0.32794			538.3	0.02121	0.02222	0.02294		538.3	-141.505	538.3	0.02294
		538.2	44.1506	44.7253	-0.12862			538.2	0.02123	0.02228	0.02302		538.2	-142.123	538.2	0.02302
		538.1	44.2723	44.8833	-0.64972			538.1	0.02127	0.02236	0.02309		538.1	-142.354	538.1	0.02309
		538	43.9439	45.0272	-0.46109			538	0.02131	0.02242	0.02313		538	-142.354	538	0.02313
		537.9	44.3171	44.5804	-0.27271			537.9	0.02136	0.02242	0.02312		537.9	-142.451	537.9	0.02312
		537.8	44.1699	44.6002	-0.4873			537.8	0.02142	0.02246	0.02316		537.8	-142.469	537.8	0.02316
		537.7	44.1827	44.4532	0.01019			537.7	0.02146	0.02247	0.02315		537.7	-143.252	537.7	0.02315
		537.6	44.3049	44.6947	-0.84299			537.6	0.02151	0.02251	0.02321		537.6	-144.024	537.6	0.02321
		537.5	44.4136	44.6269	-0.64075			537.5	0.02156	0.02253	0.02333		537.5	-144.132	537.5	0.02333
		537.4	44.1779	43.9623	-1.41245			537.4	0.02159	0.02257	0.02339		537.4	-144.917	537.4	0.02339
		537.3	44.5853	44.1081	-2.23767			537.3	0.02167	0.02264	0.02347		537.3	-145.793	537.3	0.02347
		537.2	44.9881	44.4091	-3.29876			537.2	0.02173	0.02271	0.02357		537.2	-147.346	537.2	0.02357
		537.1	45.2202	45.3776	-3.19216			537.1	0.02178	0.02278	0.0236		537.1	-147.571	537.1	0.0236
		537	45.2258	45.3319	-3.17361			537	0.02183	0.02289	0.02373		537	-148.018	537	0.02373
		536.9	45.9524	45.9907	-2.94424			536.9	0.02187	0.02294	0.02379		536.9	-148.323	536.9	0.02379
		536.8	45.7428	46.2311	-3.12303			536.8	0.02191	0.02302	0.02382		536.8	-148.841	536.8	0.02382
		536.7	45.8539	46.4628	-1.67265			536.7	0.02193	0.0231	0.02384		536.7	-149.261	536.7	0.02384
		536.6	46.4606	45.8094	-1.22939			536.6	0.02198	0.02314	0.02393		536.6	-149.745	536.6	0.02393
		536.5	46.6646	45.8117	-0.84868			536.5	0.02206	0.0232	0.02395		536.5	-149.517	536.5	0.02395
		536.4	47.4802	46.0439	-1.27256			536.4	0.02209	0.02325	0.02402		536.4	-149.281	536.4	0.02402
		536.3	47.6262	46.6971	-1.50914			536.3	0.02213	0.02333	0.02413		536.3	-149.793	536.3	0.02413
		536.2	47.3897	47.1064	-1.76514			536.2	0.02218	0.0234	0.02418		536.2	-149.969	536.2	0.02418
		536.1	47.2224	46.6546	-1.96465			536.1	0.02222	0.0235	0.02421		536.1	-150.219	536.1	0.02421
		536	46.8445	47.5821	-2.51483			536	0.02224	0.02359	0.02429		536	-151.317	536	0.02429
		535.9	46.8584	48.304	-2.08129			535.9	0.02227	0.02369	0.02437		535.9	-152.589	535.9	0.02437
		535.8	46.9906	48.1091	-2.29789			535.8	0.02231	0.02376	0.02441		535.8	-153.281	535.8	0.02441
		535.7	46.3573	49.2428	-2.09614			535.7	0.02234	0.02382	0.02449		535.7	-154.523	535.7	0.02449
		535.6	46.8897	49.7311	-1.55021			535.6	0.02239	0.02392	0.02457		535.6	-154.586	535.6	0.02457
		535.5	47.479	49.5411	-1.37245			535.5	0.02244	0.02398	0.02461		535.5	-155.741	535.5	0.02461
		535.4	47.5988	49.7792	-1.48757			535.4	0.02248	0.02404	0.02466		535.4	-156.397	535.4	0.02466
		535.3	48.4202	49.3224	-1.42793			535.3	0.02256	0.02411	0.02471		535.3	-156.894	535.3	0.02471
		535.2	48.8552	49.3022	-1.84572			535.2	0.0226	0.02413	0.0248		535.2	-157.37	535.2	0.0248
		535.1	49.342	49.4658	-2.24325			535.1	0.02267	0.02417	0.02481		535.1	-158.636	535.1	0.02481
		535	49.181	49.6588	-2.63361			535	0.02273	0.02419	0.02483		535	-159.419	535	0.02483
		534.9	50.2878	50.0232	-3.78187			534.9	0.02281	0.0242	0.02484		534.9	-159.74	534.9	0.02484
		534.8	50.0902	49.5904	-2.94403			534.8	0.02285	0.02429	0.0249		534.8	-160.12	534.8	0.0249
		534.7	50.0105	50.1525	-2.37099			534.7	0.02293	0.02436	0.02495		534.7	-160.884	534.7	0.02495
		534.6	49.7572	50.8241	-1.60554			534.6	0.02295	0.02448	0.02507		534.6	-162.191	534.6	0.02507
		534.5	49.9404	51.0646	-0.69201			534.5	0.02297	0.02455	0.02513		534.5	-163.473	534.5	0.02513
		534.4	49.9612	52.3239	-0.36288			534.4	0.02302	0.02464	0.0252		534.4	-164.8	534.4	0.0252
		534.3	49.858	52.4966	0.15516			534.3	0.02308	0.02469	0.02524		534.3	-165.174	534.3	0.02524
		534.2	49.8931	52.8958	-0.79178			534.2	0.02312	0.02475	0.02529		534.2	-165.605	534.2	0.02529
		534.1	50.9241	53.4744	0.20747			534.1	0.02319	0.02483	0.02538		534.1	-166.158	534.1	0.02538
		534	50.9448	53.2887	1.21861			534	0.02326	0.02484	0.02543		534	-166.397	534	0.02543
		533.9	51.1005	53.6282	1.82746			533.9	0.02329	0.02493	0.02546		533.9	-166.438	533.9	0.02546
		533.8	50.9202	53.9256	2.22031			533.8	0.02337	0.02497	0.02553		533.8	-166.658	533.8	0.02553
		533.7	51.0404	54.387	2.32384			533.7	0.02342	0.02502	0.02555		533.7	-167.792	533.7	0.02555
		533.6	50.7198	54.2885	2.0109			533.6	0.02346	0.02509	0.02562		533.6	-167.717	533.6	0.02562
		533.5	51.4542	54.1351	1.55571			533.5	0.02353	0.02512	0.02571		533.5	-168.267	533.5	0.02571
		533.4	51.7524	54.0014	1.10822			533.4	0.02363	0.02519	0.02578		533.4	-169.55	533.4	0.02578
		533.3	51.5734	54.7454	0.92117			533.3	0.02367	0.02525	0.02583		533.3	-170.383	533.3	0.02583
		533.2	51.6847	55.2862	0.84302			533.2	0.02369	0.02535	0.02593		533.2	-171.81	533.2	0.02593
		533.1	51.3535	55.6486	0.9198			533.1	0.02371	0.02541	0.02597		533.1	-173.644	533.1	0.02597
		533	51.6891	55.099	1.11907			533	0.02374	0.02546	0.02601		533	-174.589	533	0.02601
		532.9	52.0016	54.6947	1.35029			532.9	0.02376	0.02551	0.02608		532.9	-175.127	532.9	0.02608
		532.8	53.1643	55.5689	2.2992			532.8	0.02382	0.02558	0.02622		532.8	-176.371	532.8	0.02622
		532.7	53.6048	55.5457	2.40555			532.7	0.02392	0.02562	0.0263		532.7	-176.337	532.7	0.0263
		532.6	53.8504	55.7018	2.42118			532.6	0.024	0.02564	0.02637		532.6	-176.802	532.6	0.02637
		532.5	53.856	56.9302	3.09023			532.5	0.02408	0.02572	0.02646		532.5	-177.278	532.5	0.02646
		532.4	54.0445	56.4369	3.1092			532.4	0.02418	0.02574	0.02649		532.4	-178.053	532.4	0.02649
		532.3	53.7981	57.177	2.22432			532.3	0.02426	0.02584	0.02655		532.3	-178.288	532.3	0.02655
		532.2	53.7914	57.047	2.62005			532.2	0.02437	0.02595	0.02658		532.2	-178.483	532.2	0.02658
		532.1	53.5065	57.3383	3.01309			532.1	0.0244	0.02603	0.02661		532.1	-179.358	532.1	0.02661
		532	53.2331	57.6009	2.83948			532	0.02444	0.02607	0.02665		532	-179.411	532	0.02665
		531.9	52.899	57.8344	2.99507			531.9	0.02449	0.02615	0.02667		531.9	-180.886	531.9	0.02667
		531.8	53.3418	57.8969	2.75478			531.8	0.02453	0.02621	0.02674		531.8	-180.907	531.8	0.02674
		531.7	52.7725	58.4671	3.27377			531.7	0.02458	0.02629	0.02681		531.7	-181.529	531.7	0.02681
		531.6	52.9211	59.2919	4.01472			531.6	0.02463	0.02636	0.02687		531.6	-183.402	531.6	0.02687
		531.5	53.5352	59.4102	2.24506			531.5	0.02474	0.02641	0.02696		531.5	-183.911	531.5	0.02696
		531.4	53.9388	60.2392	2.01692			531.4	0.02481	0.02645	0.02701		531.4	-185.239	531.4	0.02701
		531.3	54.3353	60.3438	1.76978			531.3	0.02488	0.02651	0.0271		531.3	-186.139	531.3	0.0271
		531.2	53.7098	59.4655	1.98396			531.2	0.02498	0.02664	0.02718		531.2	-187.298	531.2	0.02718
		531.1	54.3072	59.2998	1.45541			531.1	0.02507	0.02671	0.02728		531.1	-187.701	531.1	0.02728
		531	55.0384	59.5251	2.23215			531	0.02512	0.02675	0.02737		531	-188.607	531	0.02737
		530.9	55.2674	59.5019	2.35364			530.9	0.02519	0.02686	0.02738		530.9	-188.783	530.9	0.02738
		530.8	55.157	59.8929	2.2508			530.8	0.02524	0.02693	0.02743		530.8	-189.901	530.8	0.02743
		530.7	55.1746	60.3689	1.725			530.7	0.02528	0.02702	0.02748		530.7	-190.212	530.7	0.02748
		530.6	55.3216	60.6278	1.49508			530.6	0.02537	0.02711	0.02755		530.6	-191.098	530.6	0.02755
		530.5	55.7289	60.3168	2.19592			530.5	0.0254	0.02716	0.02763		530.5	-191.026	530.5	0.02763
		530.4	56.1104	61.2204	2.85164			530.4	0.02545	0.02723	0.02768		530.4	-192.392	530.4	0.02768
		530.3	56.8499	62.0101	3.38271			530.3	0.02552	0.02729	0.02776		530.3	-192.422	530.3	0.02776
		530.2	56.9282	62.3807	2.8063			530.2	0.02555	0.02735	0.02787		530.2	-192.838	530.2	0.02787
		530.1	57.2531	62.4116	2.88094			530.1	0.02561	0.0274	0.02795		530.1	-193.029	530.1	0.02795
		530	57.2923	62.5105	2.11137			530	0.02567	0.02746	0.02801		530	-194.293	530	0.02801
		529.9	58.2389	62.9322	2.07025			529.9	0.02578	0.02752	0.02807		529.9	-194.205	529.9	0.02807
		529.8	58.4052	62.8677	2.21164			529.8	0.02588	0.02767	0.0282		529.8	-194.736	529.8	0.0282
		529.7	57.954	63.5025	2.74417			529.7	0.02596	0.02775	0.02828		529.7	-196.282	529.7	0.02828
		529.6	58.0754	63.9889	2.4594			529.6	0.02606	0.0278	0.02831		529.6	-196.702	529.6	0.02831
		529.5	57.6973	64.2469	1.9753			529.5	0.02612	0.02787	0.02837		529.5	-196.779	529.5	0.02837
		529.4	57.1396	64.183	1.52974			529.4	0.02615	0.02795	0.02844		529.4	-197.521	529.4	0.02844
		529.3	57.8033	64.7649	1.36828			529.3	0.02619	0.02805	0.02851		529.3	-198.946	529.3	0.02851
		529.2	57.694	64.763	1.96301			529.2	0.02619	0.02812	0.02856		529.2	-200.179	529.2	0.02856
		529.1	58.1128	64.4653	2.12966			529.1	0.02625	0.02818	0.02862		529.1	-201.285	529.1	0.02862
		529	58.4173	64.688	2.25476			529	0.02629	0.02821	0.02873		529	-202.019	529	0.02873
		528.9	58.5574	65.3643	1.29129			528.9	0.02633	0.02826	0.02879		528.9	-203.205	528.9	0.02879
		528.8	58.9002	65.9671	2.55236			528.8	0.02643	0.02835	0.0289		528.8	-204.512	528.8	0.0289
		528.7	58.7999	66.6334	2.75489			528.7	0.0265	0.02844	0.02897		528.7	-204.79	528.7	0.02897
		528.6	59.0393	66.5779	3.31364			528.6	0.02654	0.02851	0.02908		528.6	-205.338	528.6	0.02908
		528.5	59.178	66.5144	3.11809			528.5	0.02664	0.02858	0.02916		528.5	-205.751	528.5	0.02916
		528.4	58.8182	65.9373	2.11839			528.4	0.02669	0.02864	0.0292		528.4	-205.671	528.4	0.0292
		528.3	59.2094	66.0666	2.80837			528.3	0.02681	0.0287	0.02927		528.3	-206.093	528.3	0.02927
		528.2	60.0609	66.2216	2.3849			528.2	0.0269	0.02876	0.02933		528.2	-206.623	528.2	0.02933
		528.1	60.2439	66.0287	1.51215			528.1	0.02701	0.02885	0.02938		528.1	-206.557	528.1	0.02938
		528	60.4753	67.1842	1.14284			528	0.02706	0.02892	0.02944		528	-207.165	528	0.02944
		527.9	61.3762	68.2227	0.6847			527.9	0.0271	0.02895	0.0295		527.9	-207.704	527.9	0.0295
		527.8	61.339	69.1782	0.02941			527.8	0.02716	0.02907	0.02959		527.8	-208.776	527.8	0.02959
		527.7	61.1912	69.6319	-0.58939			527.7	0.0272	0.02913	0.02967		527.7	-210.473	527.7	0.02967
		527.6	61.0154	69.5689	-0.55964			527.6	0.02727	0.0292	0.02976		527.6	-211.976	527.6	0.02976
		527.5	60.7867	69.6702	-0.47752			527.5	0.02733	0.02928	0.02985		527.5	-211.913	527.5	0.02985
		527.4	60.9273	68.9903	-0.47785			527.4	0.0274	0.0293	0.02995		527.4	-213.002	527.4	0.02995
		527.3	61.9588	68.8574	0.65586			527.3	0.02751	0.02941	0.03002		527.3	-213.75	527.3	0.03002
		527.2	61.9021	68.9206	0.45272			527.2	0.02762	0.02949	0.03009		527.2	-214.175	527.2	0.03009
		527.1	61.5388	68.6201	0.41333			527.1	0.02771	0.02955	0.03016		527.1	-214.952	527.1	0.03016
		527	61.6018	68.3654	1.24715			527	0.02778	0.02963	0.03019		527	-215.184	527	0.03019
		526.9	61.87	68.3406	1.43756			526.9	0.02784	0.02974	0.03024		526.9	-215.946	526.9	0.03024
		526.8	61.7203	68.9687	1.56942			526.8	0.02795	0.02988	0.03031		526.8	-216.478	526.8	0.03031
		526.7	61.7493	69.1523	0.31218			526.7	0.02801	0.02998	0.0304		526.7	-216.903	526.7	0.0304
		526.6	62.2242	69.1666	1.31424			526.6	0.02803	0.03005	0.03046		526.6	-217.626	526.6	0.03046
		526.5	62.2648	69.6175	1.13388			526.5	0.02814	0.03013	0.03055		526.5	-217.661	526.5	0.03055
		526.4	62.9832	70.4745	1.60452			526.4	0.0282	0.03023	0.03067		526.4	-218.116	526.4	0.03067
		526.3	62.6848	70.6335	2.23283			526.3	0.02828	0.0303	0.03074		526.3	-220.839	526.3	0.03074
		526.2	63.9027	70.8269	2.26439			526.2	0.02832	0.03038	0.03082		526.2	-221.714	526.2	0.03082
		526.1	64.4601	70.8837	2.50028			526.1	0.0284	0.03044	0.03091		526.1	-222.948	526.1	0.03091
		526	64.4066	70.9459	1.99506			526	0.02847	0.03053	0.03099		526	-223.328	526	0.03099
		525.9	64.8324	70.9829	1.20122			525.9	0.02854	0.03063	0.03109		525.9	-223.685	525.9	0.03109
		525.8	65.1638	71.8217	0.72474			525.8	0.02865	0.03067	0.03118		525.8	-223.7	525.8	0.03118
		525.7	65.4109	71.977	0.93907			525.7	0.02871	0.03076	0.03128		525.7	-224.384	525.7	0.03128
		525.6	66.0436	72.0368	1.23049			525.6	0.02877	0.03084	0.03136		525.6	-224.808	525.6	0.03136
		525.5	66.3225	72.617	0.25148			525.5	0.02883	0.03093	0.03144		525.5	-225.357	525.5	0.03144
		525.4	66.7296	72.307	1.15078			525.4	0.02892	0.03098	0.03157		525.4	-226.755	525.4	0.03157
		525.3	66.873	73.1812	1.52256			525.3	0.02902	0.03105	0.03165		525.3	-228.002	525.3	0.03165
		525.2	67.4829	73.7394	1.10545			525.2	0.02909	0.03114	0.03179		525.2	-228.422	525.2	0.03179
		525.1	67.6699	74.0473	1.45567			525.1	0.02917	0.03121	0.03192		525.1	-228.916	525.1	0.03192
		525	67.6175	73.8775	1.35606			525	0.02918	0.03129	0.03202		525	-230.036	525	0.03202
		524.9	67.4794	74.8532	1.46485			524.9	0.0292	0.03139	0.03215		524.9	-231.08	524.9	0.03215
		524.8	67.6664	75.1694	2.31539			524.8	0.02922	0.03149	0.03224		524.8	-231.86	524.8	0.03224
		524.7	68.3439	76.1816	1.88681			524.7	0.0293	0.03156	0.03239		524.7	-232.97	524.7	0.03239
		524.6	68.5715	75.9745	1.96565			524.6	0.0294	0.03165	0.03247		524.6	-233.475	524.6	0.03247
		524.5	68.9782	76.2604	2.40971			524.5	0.02951	0.03168	0.03255		524.5	-234.049	524.5	0.03255
		524.4	69.6263	76.3011	3.80238			524.4	0.02965	0.03178	0.03263		524.4	-234.939	524.4	0.03263
		524.3	70.0403	76.8149	3.71467			524.3	0.02974	0.03182	0.03271		524.3	-235.657	524.3	0.03271
		524.2	70.24	77.3488	3.02964			524.2	0.02981	0.03192	0.03278		524.2	-236.323	524.2	0.03278
		524.1	69.903	78.9228	2.62163			524.1	0.02989	0.03203	0.03284		524.1	-237.792	524.1	0.03284
		524	70.0879	79.1089	2.03089			524	0.02993	0.03208	0.03296		524	-238.351	524	0.03296
		523.9	70.7822	79.0484	2.78369			523.9	0.02997	0.03217	0.03304		523.9	-239.594	523.9	0.03304
		523.8	70.9932	79.5743	1.95115			523.8	0.03005	0.03228	0.03317		523.8	-241.21	523.8	0.03317
		523.7	71.3825	80.7615	1.48759			523.7	0.03012	0.0324	0.03328		523.7	-243.023	523.7	0.03328
		523.6	71.5821	81.4171	2.22581			523.6	0.0302	0.03251	0.0334		523.6	-243.562	523.6	0.0334
		523.5	72.0468	80.9762	2.727			523.5	0.03027	0.03259	0.03348		523.5	-244.349	523.5	0.03348
		523.4	72.251	81.043	2.91574			523.4	0.03034	0.03263	0.03358		523.4	-245.264	523.4	0.03358
		523.3	72.3073	81.3917	2.38439			523.3	0.03045	0.03272	0.03366		523.3	-246.043	523.3	0.03366
		523.2	73.9102	81.8534	2.75736			523.2	0.03051	0.03277	0.03372		523.2	-247.547	523.2	0.03372
		523.1	74.1254	82.026	2.18589			523.1	0.03062	0.03284	0.03376		523.1	-248.389	523.1	0.03376
		523	74.5841	81.5205	2.19146			523	0.03071	0.03295	0.0338		523	-248.005	523	0.0338
		522.9	74.5471	82.0237	2.25426			522.9	0.0308	0.03304	0.03389		522.9	-248.636	522.9	0.03389
		522.8	75.2893	82.4494	2.66888			522.8	0.03089	0.03313	0.03394		522.8	-249.639	522.8	0.03394
		522.7	76.1653	82.7243	2.90838			522.7	0.031	0.0332	0.034		522.7	-250.223	522.7	0.034
		522.6	76.7863	83.1177	2.05458			522.6	0.03107	0.03328	0.03408		522.6	-251.084	522.6	0.03408
		522.5	76.5702	82.9249	3.0951			522.5	0.03111	0.0334	0.03416		522.5	-252.93	522.5	0.03416
		522.4	76.7171	83.0504	2.03343			522.4	0.03121	0.03346	0.03426		522.4	-253.452	522.4	0.03426
		522.3	77.2042	83.6086	1.09329			522.3	0.03129	0.03357	0.03439		522.3	-254.701	522.3	0.03439
		522.2	77.1261	83.3501	2.09021			522.2	0.03136	0.03367	0.03448		522.2	-256.296	522.2	0.03448
		522.1	77.3341	84.0229	1.10698			522.1	0.03144	0.03376	0.03458		522.1	-256.871	522.1	0.03458
		522	78.2374	83.2819	0.67632			522	0.03153	0.03391	0.03467		522	-257.234	522	0.03467
		521.9	77.9729	84.3295	1.47097			521.9	0.03163	0.03398	0.03475		521.9	-258.202	521.9	0.03475
		521.8	78.7537	84.9918	1.888			521.8	0.03171	0.03409	0.03477		521.8	-258.967	521.8	0.03477
		521.7	78.9585	85.6896	1.94177			521.7	0.03179	0.0342	0.03483		521.7	-259.833	521.7	0.03483
		521.6	79.5637	84.8708	1.83735			521.6	0.0319	0.03433	0.03488		521.6	-261.61	521.6	0.03488
		521.5	79.5626	85.3938	2.41872			521.5	0.03197	0.03443	0.03493		521.5	-262.539	521.5	0.03493
		521.4	79.8364	85.24	2.26545			521.4	0.03202	0.03455	0.03494		521.4	-263.5	521.4	0.03494
		521.3	79.7137	86.0625	2.82141			521.3	0.03209	0.03469	0.03505		521.3	-264.01	521.3	0.03505
		521.2	79.7078	86.1764	2.79034			521.2	0.0321	0.03483	0.03516		521.2	-265.02	521.2	0.03516
		521.1	79.8436	86.7896	2.59104			521.1	0.03219	0.03496	0.03527		521.1	-265.844	521.1	0.03527
		521	80.3704	86.9132	2.68883			521	0.03223	0.03509	0.03538		521	-265.981	521	0.03538
		520.9	81.0665	86.312	3.41232			520.9	0.03227	0.03522	0.03551		520.9	-267.604	520.9	0.03551
		520.8	81.9628	85.4706	2.74369			520.8	0.03232	0.0353	0.0356		520.8	-268.227	520.8	0.0356
		520.7	81.7862	86.0234	2.43934			520.7	0.03239	0.03544	0.03569		520.7	-269.216	520.7	0.03569
		520.6	81.5143	86.6901	0.84105			520.6	0.03247	0.03555	0.03583		520.6	-270.016	520.6	0.03583
		520.5	81.4412	87.2053	0.70075			520.5	0.03253	0.03563	0.03587		520.5	-270.451	520.5	0.03587
		520.4	81.6533	87.249	1.00343			520.4	0.03262	0.03574	0.03594		520.4	-271.551	520.4	0.03594
		520.3	81.3901	87.1379	0.43231			520.3	0.03271	0.0358	0.036		520.3	-272.654	520.3	0.036
		520.2	81.0699	87.4609	-0.60348			520.2	0.03281	0.03589	0.03609		520.2	-274.075	520.2	0.03609
		520.1	80.7258	88.4293	-0.75749			520.1	0.03292	0.036	0.03615		520.1	-275.769	520.1	0.03615
		520	80.7157	89.1671	-0.27639			520	0.033	0.03611	0.03624		520	-277.533	520	0.03624
		519.9	80.5011	89.9403	-0.56838			519.9	0.03311	0.0362	0.03638		519.9	-277.637	519.9	0.03638
		519.8	81.1226	90.2101	-0.49535			519.8	0.03315	0.03634	0.0365		519.8	-278.713	519.8	0.0365
		519.7	81.3636	91.481	-1.34855			519.7	0.0332	0.0364	0.03664		519.7	-279.624	519.7	0.03664
		519.6	82.2242	91.2862	-2.49772			519.6	0.03326	0.03653	0.03678		519.6	-280.616	519.6	0.03678
		519.5	82.2799	91.6654	-3.07953			519.5	0.03333	0.03662	0.03686		519.5	-281.397	519.5	0.03686
		519.4	81.975	92.1701	-3.866			519.4	0.0334	0.03672	0.03699		519.4	-282.429	519.4	0.03699
		519.3	82.7273	92.3032	-2.82039			519.3	0.03351	0.03685	0.0371		519.3	-283.379	519.3	0.0371
		519.2	83.0355	92.7801	-3.60882			519.2	0.03362	0.03695	0.03718		519.2	-284.421	519.2	0.03718
		519.1	83.3783	93.8624	-3.44934			519.1	0.03373	0.03704	0.03725		519.1	-285.537	519.1	0.03725
		519	82.7203	93.2587	-2.93046			519	0.03385	0.03715	0.03731		519	-286.772	519	0.03731
		518.9	82.8402	94.1428	-2.69692			518.9	0.03393	0.03725	0.03738		518.9	-287.655	518.9	0.03738
		518.8	82.9311	94.7444	-3.64073			518.8	0.03401	0.03735	0.03746		518.8	-289.08	518.8	0.03746
		518.7	83.0955	94.9645	-2.97171			518.7	0.03407	0.03741	0.03757		518.7	-290.201	518.7	0.03757
		518.6	83.5518	94.7714	-3.67901			518.6	0.03409	0.03748	0.03765		518.6	-291.732	518.6	0.03765
		518.5	83.326	94.092	-3.95055			518.5	0.03413	0.0376	0.03778		518.5	-293.115	518.5	0.03778
		518.4	83.9519	94.1507	-3.96986			518.4	0.03422	0.03771	0.03793		518.4	-294.21	518.4	0.03793
		518.3	84.7468	95.0141	-3.53802			518.3	0.03431	0.03782	0.03808		518.3	-294.255	518.3	0.03808
		518.2	84.8549	95.5968	-4.67811			518.2	0.03443	0.03792	0.0382		518.2	-294.978	518.2	0.0382
		518.1	85.5148	95.9187	-4.43247			518.1	0.03454	0.03801	0.0383		518.1	-295.18	518.1	0.0383
		518	86.1429	95.7052	-5.70958			518	0.03466	0.0381	0.03841		518	-296.119	518	0.03841
		517.9	87.2771	95.6115	-4.89046			517.9	0.03476	0.03819	0.03849		517.9	-297.257	517.9	0.03849
		517.8	87.2925	96.0763	-4.90275			517.8	0.03485	0.03827	0.03856		517.8	-298.938	517.8	0.03856
		517.7	87.1473	96.4614	-6.0872			517.7	0.03499	0.03832	0.03864		517.7	-299.918	517.7	0.03864
		517.6	87.919	97.0374	-6.45403			517.6	0.0351	0.03841	0.0387		517.6	-301.171	517.6	0.0387
		517.5	87.084	98.3193	-6.89555			517.5	0.03524	0.03855	0.03882		517.5	-302.076	517.5	0.03882
		517.4	87.8707	98.0894	-5.90705			517.4	0.03538	0.03868	0.03892		517.4	-303.083	517.4	0.03892
		517.3	88.4105	98.3178	-5.06595			517.3	0.03548	0.03875	0.03901		517.3	-304.159	517.3	0.03901
		517.2	89.6033	98.7275	-4.7876			517.2	0.03557	0.03885	0.03912		517.2	-305.739	517.2	0.03912
		517.1	90.0704	98.7444	-4.38323			517.1	0.03567	0.03893	0.03923		517.1	-307.286	517.1	0.03923
		517	90.6558	98.9903	-4.08543			517	0.03577	0.03904	0.03936		517	-307.946	517	0.03936
		516.9	91.1735	99.0455	-3.98419			516.9	0.03587	0.03916	0.03946		516.9	-308.772	516.9	0.03946
		516.8	92.0101	99.6103	-3.32277			516.8	0.03595	0.03926	0.03959		516.8	-310.399	516.8	0.03959
		516.7	92.4021	99.4978	-3.14032			516.7	0.03606	0.03939	0.0397		516.7	-310.103	516.7	0.0397
		516.6	92.4775	99.5271	-3.26982			516.6	0.03615	0.03949	0.03982		516.6	-311.724	516.6	0.03982
		516.5	92.0627	98.8994	-3.46346			516.5	0.03627	0.03959	0.03996		516.5	-311.671	516.5	0.03996
		516.4	91.9737	99.554	-2.47669			516.4	0.0364	0.03971	0.04005		516.4	-313.578	516.4	0.04005
		516.3	92.27	99.14	-2.08826			516.3	0.03652	0.03981	0.04012		516.3	-314.416	516.3	0.04012
		516.2	91.4326	99.5142	-0.66294			516.2	0.03664	0.03992	0.04017		516.2	-315.165	516.2	0.04017
		516.1	92.7878	99.9777	-0.04891			516.1	0.03674	0.04007	0.04026		516.1	-317.094	516.1	0.04026
		516	92.4478	100.282	-0.13254			516	0.03685	0.04021	0.04038		516	-318.451	516	0.04038
		515.9	92.4665	100.547	0.11137			515.9	0.03694	0.04031	0.04054		515.9	-319.47	515.9	0.04054
		515.8	93.5358	100.84	1.22771			515.8	0.037	0.04042	0.04069		515.8	-319.645	515.8	0.04069
		515.7	94.1109	100.373	1.74016			515.7	0.03708	0.04055	0.04082		515.7	-320.601	515.7	0.04082
		515.6	93.8018	100.421	1.04151			515.6	0.03719	0.04062	0.04096		515.6	-321.374	515.6	0.04096
		515.5	93.9858	100.607	2.24604			515.5	0.03733	0.04072	0.04109		515.5	-321.834	515.5	0.04109
		515.4	94.2026	99.6285	1.86276			515.4	0.03744	0.04083	0.04119		515.4	-322.302	515.4	0.04119
		515.3	93.9583	100.382	0.2499			515.3	0.03756	0.04092	0.04132		515.3	-323.227	515.3	0.04132
		515.2	95.5987	100.296	0.15731			515.2	0.03768	0.04104	0.04143		515.2	-324.507	515.2	0.04143
		515.1	95.1672	101.083	-0.98485			515.1	0.03782	0.04115	0.04151		515.1	-325.556	515.1	0.04151
		515	94.8107	101.162	-0.25892			515	0.03792	0.04121	0.04159		515	-326.736	515	0.04159
		514.9	94.7357	100.124	-0.03093			514.9	0.038	0.04129	0.04166		514.9	-329.177	514.9	0.04166
		514.8	95.0857	99.907	-0.068			514.8	0.03809	0.04139	0.04177		514.8	-329.371	514.8	0.04177
		514.7	94.548	100.282	0.38442			514.7	0.03817	0.0415	0.04186		514.7	-332.039	514.7	0.04186
		514.6	94.6602	101.574	-0.27134			514.6	0.03831	0.04162	0.04194		514.6	-333.309	514.6	0.04194
		514.5	94.8595	101.517	-1.117			514.5	0.03845	0.04176	0.04205		514.5	-334.51	514.5	0.04205
		514.4	95.6238	101.296	-0.63917			514.4	0.03857	0.04192	0.04216		514.4	-336.106	514.4	0.04216
		514.3	96.204	102.925	0.21078			514.3	0.03868	0.04205	0.04232		514.3	-337.692	514.3	0.04232
		514.2	96.6663	104.23	0.64171			514.2	0.03881	0.04215	0.04246		514.2	-338.947	514.2	0.04246
		514.1	97.344	104.747	-0.57171			514.1	0.03888	0.04225	0.04255		514.1	-340.299	514.1	0.04255
		514	97.1898	105.383	-1.70007			514	0.03901	0.04237	0.04267		514	-341.737	514	0.04267
		513.9	97.3705	105.342	-0.604			513.9	0.03909	0.04249	0.0428		513.9	-342.834	513.9	0.0428
		513.8	97.1442	106.18	-0.97334			513.8	0.0392	0.04261	0.04293		513.8	-343.351	513.8	0.04293
		513.7	98.1952	107.411	-1.95887			513.7	0.0393	0.04274	0.04302		513.7	-344.537	513.7	0.04302
		513.6	98.6458	107.569	-1.21144			513.6	0.03935	0.04284	0.04309		513.6	-344.616	513.6	0.04309
		513.5	98.9084	108.516	-2.50203			513.5	0.03943	0.04291	0.04323		513.5	-346.361	513.5	0.04323
		513.4	99.6635	109.902	-2.78704			513.4	0.03951	0.04303	0.04333		513.4	-348.208	513.4	0.04333
		513.3	100.457	110.145	-3.34924			513.3	0.03958	0.04314	0.04346		513.3	-348.875	513.3	0.04346
		513.2	101.135	110.718	-3.24441			513.2	0.03967	0.04324	0.04355		513.2	-350.629	513.2	0.04355
		513.1	101.36	111.653	-2.63575			513.1	0.03975	0.04335	0.04369		513.1	-352.242	513.1	0.04369
		513	101.644	112.849	-3.79917			513	0.03985	0.04349	0.04386		513	-353.532	513	0.04386
		512.9	102.375	113.901	-4.26766			512.9	0.03995	0.04366	0.04402		512.9	-355.769	512.9	0.04402
		512.8	103.477	114.747	-4.13185			512.8	0.04005	0.04379	0.04417		512.8	-356.976	512.8	0.04417
		512.7	103.307	115.896	-6.29484			512.7	0.04014	0.04389	0.0443		512.7	-358.312	512.7	0.0443
		512.6	103.766	116.524	-5.82543			512.6	0.04025	0.04399	0.04439		512.6	-359.406	512.6	0.04439
		512.5	103.842	116.54	-6.65515			512.5	0.04037	0.04409	0.04445		512.5	-361.183	512.5	0.04445
		512.4	103.906	117.099	-7.45177			512.4	0.0405	0.04421	0.04453		512.4	-363.478	512.4	0.04453
		512.3	104.736	117.452	-6.54901			512.3	0.04061	0.04432	0.04462		512.3	-364.615	512.3	0.04462
		512.2	104.942	118.087	-6.1116			512.2	0.0407	0.04449	0.0447		512.2	-366.665	512.2	0.0447
		512.1	104.794	119.403	-7.61102			512.1	0.04083	0.04467	0.04484		512.1	-368.661	512.1	0.04484
		512	105.658	120.425	-7.11028			512	0.04093	0.04483	0.04496		512	-370.509	512	0.04496
		511.9	105.284	120.453	-6.92229			511.9	0.04105	0.045	0.04509		511.9	-371.711	511.9	0.04509
		511.8	105.242	121.392	-5.9122			511.8	0.04118	0.04513	0.04526		511.8	-372.698	511.8	0.04526
		511.7	105.767	122.586	-5.74946			511.7	0.04128	0.0453	0.04544		511.7	-373.627	511.7	0.04544
		511.6	106.41	123.49	-5.86388			511.6	0.04142	0.04552	0.04558		511.6	-374.474	511.6	0.04558
		511.5	106.341	124.366	-6.35611			511.5	0.04153	0.04563	0.04573		511.5	-375.319	511.5	0.04573
		511.4	107.02	124.286	-7.3315			511.4	0.04166	0.04579	0.04585		511.4	-377.345	511.4	0.04585
		511.3	106.9	125.234	-7.19425			511.3	0.04178	0.04593	0.04604		511.3	-379.056	511.3	0.04604
		511.2	107.311	124.445	-5.55101			511.2	0.04187	0.04607	0.04617		511.2	-379.942	511.2	0.04617
		511.1	107.632	125.197	-5.82024			511.1	0.04198	0.04616	0.04629		511.1	-380.48	511.1	0.04629
		511	107.761	125.017	-4.98419			511	0.0421	0.04625	0.0464		511	-380.616	511	0.0464
		510.9	108.294	125.234	-4.88002			510.9	0.04218	0.04636	0.04646		510.9	-381.027	510.9	0.04646
		510.8	109.244	124.417	-5.70606			510.8	0.04226	0.0465	0.04657		510.8	-381.799	510.8	0.04657
		510.7	109.312	124.551	-4.49089			510.7	0.04237	0.04665	0.0467		510.7	-383.547	510.7	0.0467
		510.6	109.366	125.81	-4.1096			510.6	0.04249	0.04671	0.04684		510.6	-385.203	510.6	0.04684
		510.5	109.568	126.516	-3.54048			510.5	0.04259	0.04685	0.04696		510.5	-386.906	510.5	0.04696
		510.4	110.296	125.738	-2.45905			510.4	0.04274	0.04697	0.04711		510.4	-389.142	510.4	0.04711
		510.3	110.906	125.721	-3.2915			510.3	0.04289	0.04705	0.04727		510.3	-391.14	510.3	0.04727
		510.2	111.21	125.234	-2.43748			510.2	0.04297	0.04717	0.04744		510.2	-392.439	510.2	0.04744
		510.1	111.397	124.719	-0.76122			510.1	0.04311	0.04729	0.04757		510.1	-393.347	510.1	0.04757
		510	111.335	126.169	-0.7976			510	0.04322	0.04744	0.04766		510	-394.722	510	0.04766
		509.9	111.044	126.684	-2.03944			509.9	0.04336	0.04759	0.04779		509.9	-397.23	509.9	0.04779
		509.8	111.868	126.878	-2.65714			509.8	0.04349	0.04774	0.04791		509.8	-399.249	509.8	0.04791
		509.7	111.65	127.271	-1.53258			509.7	0.04359	0.04785	0.04802		509.7	-399.963	509.7	0.04802
		509.6	112.647	128.079	-2.20743			509.6	0.04368	0.04796	0.04813		509.6	-401.654	509.6	0.04813
		509.5	112.251	127.417	-2.73943			509.5	0.04384	0.04803	0.04821		509.5	-402.088	509.5	0.04821
		509.4	112.141	127.425	-1.23187			509.4	0.04397	0.04816	0.04833		509.4	-403.263	509.4	0.04833
		509.3	113.42	126.594	-2.71014			509.3	0.04408	0.04835	0.04848		509.3	-405.448	509.3	0.04848
		509.2	113.901	127.584	-1.83383			509.2	0.04421	0.0485	0.04862		509.2	-407.271	509.2	0.04862
		509.1	114.639	128.483	-1.87188			509.1	0.04432	0.04864	0.04881		509.1	-409.387	509.1	0.04881
		509	115.445	128.153	-3.76089			509	0.04441	0.0488	0.04898		509	-411.021	509	0.04898
		508.9	116.306	127.685	-4.77269			508.9	0.04448	0.04894	0.04911		508.9	-412.83	508.9	0.04911
		508.8	116.972	127.872	-3.65507			508.8	0.0446	0.04903	0.04926		508.8	-414.634	508.8	0.04926
		508.7	117.517	128.824	-2.66072			508.7	0.04475	0.04917	0.04939		508.7	-417.076	508.7	0.04939
		508.6	119.001	129.012	-2.22584			508.6	0.04492	0.04928	0.04952		508.6	-418.356	508.6	0.04952
		508.5	119.62	130.06	-2.61058			508.5	0.04503	0.04937	0.04961		508.5	-420.879	508.5	0.04961
		508.4	120.44	128.791	-2.94464			508.4	0.04518	0.04951	0.04973		508.4	-422.305	508.4	0.04973
		508.3	121.765	129.454	-2.3462			508.3	0.04526	0.04961	0.04983		508.3	-424.817	508.3	0.04983
		508.2	122.059	130.064	-2.33433			508.2	0.04538	0.04976	0.04996		508.2	-426.38	508.2	0.04996
		508.1	122.854	130.262	-2.14386			508.1	0.04554	0.04985	0.05009		508.1	-428.082	508.1	0.05009
		508	123.387	130.014	-1.59177			508	0.04561	0.04996	0.05023		508	-428.009	508	0.05023
		507.9	123.726	130.453	-1.20771			507.9	0.04574	0.05003	0.05039		507.9	-428.642	507.9	0.05039
		507.8	123.553	131.114	-1.34792			507.8	0.04585	0.05016	0.05053		507.8	-430.595	507.8	0.05053
		507.7	124.335	131.135	-1.86139			507.7	0.04596	0.05028	0.0507		507.7	-433.367	507.7	0.0507
		507.6	125.328	131.858	-2.60825			507.6	0.04607	0.05038	0.05087		507.6	-436.897	507.6	0.05087
		507.5	124.936	132.874	-2.16938			507.5	0.0462	0.0505	0.05103		507.5	-437.412	507.5	0.05103
		507.4	124.857	132.801	-2.53953			507.4	0.04636	0.05064	0.05121		507.4	-440.603	507.4	0.05121
		507.3	126.055	133.113	-3.31901			507.3	0.04648	0.05082	0.05132		507.3	-441.439	507.3	0.05132
		507.2	126.36	133.51	-3.44023			507.2	0.04659	0.05093	0.05149		507.2	-443.881	507.2	0.05149
		507.1	126.074	133.54	-4.57081			507.1	0.0467	0.05107	0.05159		507.1	-444.775	507.1	0.05159
		507	125.68	133.919	-4.36026			507	0.04681	0.05122	0.05171		507	-446.291	507	0.05171
		506.9	126.234	135.222	-5.42161			506.9	0.04698	0.05134	0.05182		506.9	-448.164	506.9	0.05182
		506.8	126.932	136.343	-6.22956			506.8	0.04712	0.0515	0.05195		506.8	-449.349	506.8	0.05195
		506.7	128.627	135.895	-5.36215			506.7	0.04727	0.05161	0.05213		506.7	-450.91	506.7	0.05213
		506.6	128.766	135.524	-4.95102			506.6	0.04736	0.05179	0.05228		506.6	-452.376	506.6	0.05228
		506.5	129.241	135.989	-4.34798			506.5	0.04748	0.05192	0.05243		506.5	-453.445	506.5	0.05243
		506.4	130.787	136.123	-4.88373			506.4	0.04761	0.05205	0.05254		506.4	-456.277	506.4	0.05254
		506.3	131.355	135.868	-4.01505			506.3	0.04776	0.0522	0.05268		506.3	-457.156	506.3	0.05268
		506.2	132.49	135.99	-4.23259			506.2	0.04784	0.05238	0.05284		506.2	-459.104	506.2	0.05284
		506.1	134.041	136.224	-4.79613			506.1	0.04794	0.05253	0.053		506.1	-461.129	506.1	0.053
		506	133.941	136.334	-3.418			506	0.04805	0.05262	0.05314		506	-461.588	506	0.05314
		505.9	134.459	135.804	-3.12885			505.9	0.04819	0.05282	0.05332		505.9	-463.92	505.9	0.05332
		505.8	135.175	136.408	-1.55898			505.8	0.04829	0.05298	0.05342		505.8	-465.703	505.8	0.05342
		505.7	136.276	137.317	-1.12362			505.7	0.04845	0.05314	0.05358		505.7	-467.271	505.7	0.05358
		505.6	135.798	139.172	-0.79232			505.6	0.04862	0.0533	0.0537		505.6	-468.633	505.6	0.0537
		505.5	136.042	139.703	-2.23112			505.5	0.04872	0.05344	0.05384		505.5	-469.595	505.5	0.05384
		505.4	136.074	140.305	-2.82997			505.4	0.04879	0.05353	0.05395		505.4	-469.942	505.4	0.05395
		505.3	136.029	140.59	-3.87367			505.3	0.04891	0.05369	0.05411		505.3	-471.339	505.3	0.05411
		505.2	135.816	141.65	-4.3809			505.2	0.04897	0.05379	0.05429		505.2	-472.722	505.2	0.05429
		505.1	135.827	143.117	-3.56475			505.1	0.04908	0.05391	0.05442		505.1	-475.382	505.1	0.05442
		505	136.338	144.053	-3.55257			505	0.0492	0.05402	0.05456		505	-475.939	505	0.05456
		504.9	136.167	144.689	-2.88775			504.9	0.04933	0.05417	0.05474		504.9	-477.702	504.9	0.05474
		504.8	135.897	145.429	-2.33673			504.8	0.04942	0.0543	0.05491		504.8	-479.449	504.8	0.05491
		504.7	136.029	146.88	-2.7556			504.7	0.04954	0.05448	0.05506		504.7	-482.146	504.7	0.05506
		504.6	137.114	147.391	-4.72065			504.6	0.04972	0.05474	0.05524		504.6	-484.262	504.6	0.05524
		504.5	137.076	148.046	-5.40445			504.5	0.04983	0.05493	0.05537		504.5	-485.471	504.5	0.05537
		504.4	137.43	148.743	-4.90079			504.4	0.04994	0.05512	0.05554		504.4	-486.582	504.4	0.05554
		504.3	136.468	149.858	-6.24638			504.3	0.05008	0.0553	0.0557		504.3	-488.012	504.3	0.0557
		504.2	138.063	150.916	-7.01431			504.2	0.05024	0.05546	0.05585		504.2	-490.406	504.2	0.05585
		504.1	138.598	151.608	-6.51344			504.1	0.05041	0.05561	0.056		504.1	-491.791	504.1	0.056
		504	138.784	151.897	-5.56587			504	0.05055	0.05578	0.05619		504	-493.206	504	0.05619
		503.9	139.968	153.343	-6.99895			503.9	0.05072	0.05596	0.05635		503.9	-495.76	503.9	0.05635
		503.8	140.399	154.897	-6.41463			503.8	0.05087	0.05613	0.05651		503.8	-496.965	503.8	0.05651
		503.7	141.206	155.821	-6.27179			503.7	0.051	0.05633	0.05666		503.7	-498.711	503.7	0.05666
		503.6	141.305	154.94	-5.99017			503.6	0.05109	0.05648	0.05681		503.6	-500.289	503.6	0.05681
		503.5	142.1	156.737	-6.35179			503.5	0.0512	0.05663	0.057		503.5	-501.789	503.5	0.057
		503.4	141.744	156.691	-7.2974			503.4	0.05134	0.05676	0.05713		503.4	-503.173	503.4	0.05713
		503.3	142.227	157.626	-5.95896			503.3	0.05152	0.05689	0.0573		503.3	-504.103	503.3	0.0573
		503.2	142.237	158.303	-6.1732			503.2	0.05166	0.05704	0.05744		503.2	-505.801	503.2	0.05744
		503.1	142.347	158.596	-6.14798			503.1	0.0518	0.05718	0.05761		503.1	-506.729	503.1	0.05761
		503	142.293	158.911	-6.0376			503	0.05193	0.05736	0.05776		503	-508.283	503	0.05776
		502.9	142.227	159.785	-5.3084			502.9	0.05206	0.05746	0.05792		502.9	-509.649	502.9	0.05792
		502.8	141.42	160.815	-4.68435			502.8	0.05222	0.05761	0.0581		502.8	-511.452	502.8	0.0581
		502.7	141.858	162.144	-3.04811			502.7	0.05235	0.05778	0.05823		502.7	-513.41	502.7	0.05823
		502.6	141.614	163.544	-4.02596			502.6	0.0525	0.05792	0.05843		502.6	-515.003	502.6	0.05843
		502.5	142.156	164.054	-3.46428			502.5	0.05266	0.05809	0.05863		502.5	-516.271	502.5	0.05863
		502.4	141.979	166.066	-3.19547			502.4	0.05277	0.05827	0.0588		502.4	-517.994	502.4	0.0588
		502.3	143.384	166.098	-2.70756			502.3	0.05291	0.05842	0.05897		502.3	-520.02	502.3	0.05897
		502.2	144.694	167.661	-1.2892			502.2	0.05313	0.0586	0.05914		502.2	-522.645	502.2	0.05914
		502.1	145.666	168.001	-0.93925			502.1	0.05329	0.05876	0.05931		502.1	-525.422	502.1	0.05931
		502	146.393	169.309	1.09921			502	0.05346	0.0589	0.05939		502	-526.905	502	0.05939
		501.9	147.502	170.274	0.09937			501.9	0.05367	0.0591	0.05956		501.9	-528.44	501.9	0.05956
		501.8	148.19	169.793	-1.32595			501.8	0.05383	0.05926	0.05971		501.8	-529.68	501.8	0.05971
		501.7	148.435	170.178	-0.36477			501.7	0.05398	0.05942	0.05987		501.7	-533.154	501.7	0.05987
		501.6	149.833	169.709	-1.24024			501.6	0.05412	0.05965	0.05998		501.6	-533.391	501.6	0.05998
		501.5	151.592	170.959	-1.27458			501.5	0.05428	0.05981	0.06017		501.5	-535.054	501.5	0.06017
		501.4	152.563	170.582	-1.98267			501.4	0.0544	0.06	0.06031		501.4	-537.973	501.4	0.06031
		501.3	152.648	171.973	-1.68719			501.3	0.05453	0.06016	0.06048		501.3	-540.634	501.3	0.06048
		501.2	154.109	172.805	-1.0911			501.2	0.05469	0.06033	0.06067		501.2	-542.589	501.2	0.06067
		501.1	153.677	173.056	-1.2303			501.1	0.05478	0.0605	0.06078		501.1	-544.562	501.1	0.06078
		501	154.729	173.457	-0.94206			501	0.05493	0.06066	0.06096		501	-545.981	501	0.06096
		500.9	154.397	172.305	-0.37779			500.9	0.05507	0.0608	0.0611		500.9	-547.364	500.9	0.0611
		500.8	154.438	173.227	0.22133			500.8	0.0552	0.06099	0.06126		500.8	-549.658	500.8	0.06126
		500.7	155.341	173.3	-0.48753			500.7	0.05534	0.0611	0.06141		500.7	-551.262	500.7	0.06141
		500.6	156.193	173.273	-0.6249			500.6	0.05551	0.06125	0.06159		500.6	-552.919	500.6	0.06159
		500.5	156.587	172.829	0.01434			500.5	0.05571	0.06143	0.06175		500.5	-554.336	500.5	0.06175
		500.4	157.601	172.887	-0.02924			500.4	0.05588	0.06159	0.06195		500.4	-556.235	500.4	0.06195
		500.3	158.395	173.814	0.42011			500.3	0.05608	0.06181	0.06213		500.3	-557.085	500.3	0.06213
		500.2	158.06	172.674	-0.01064			500.2	0.05625	0.06206	0.06228		500.2	-558.699	500.2	0.06228
		500.1	158.921	175.182	1.10122			500.1	0.05642	0.06228	0.06247		500.1	-559.871	500.1	0.06247
		500	159.9	175.942	0.83593			500	0.05653	0.06249	0.06263		500	-562.683	500	0.06263
		499.9	160.233	176.665	-0.97223			499.9	0.05665	0.06273	0.06281		499.9	-564.012	499.9	0.06281
		499.8	160.664	176.849	-1.35407			499.8	0.05676	0.06293	0.06301		499.8	-565.755	499.8	0.06301
		499.7	160.738	178.536	-2.20288			499.7	0.05692	0.06311	0.06322		499.7	-568.198	499.7	0.06322
		499.6	161.58	179.848	-1.36428			499.6	0.05712	0.06333	0.06344		499.6	-570.414	499.6	0.06344
		499.5	163.166	181.028	-3.81009			499.5	0.05729	0.0636	0.06366		499.5	-572.003	499.5	0.06366
		499.4	163.94	180.708	-4.62298			499.4	0.05744	0.06378	0.06385		499.4	-573.25	499.4	0.06385
		499.3	165.445	181.388	-2.6459			499.3	0.0576	0.06395	0.06404		499.3	-575.192	499.3	0.06404
		499.2	165.454	181.749	-4.02766			499.2	0.05778	0.06413	0.06421		499.2	-576.096	499.2	0.06421
		499.1	166.298	181.15	-3.99711			499.1	0.05793	0.06431	0.06443		499.1	-578.319	499.1	0.06443
		499	166.735	181.874	-4.87487			499	0.05812	0.06454	0.06469		499	-580.269	499	0.06469
		498.9	167.111	182.404	-6.0918			498.9	0.05832	0.06481	0.06498		498.9	-581.711	498.9	0.06498
		498.8	166.804	182.747	-5.01515			498.8	0.05847	0.06506	0.06522		498.8	-582.823	498.8	0.06522
		498.7	166.754	182.12	-6.23382			498.7	0.05863	0.06529	0.0655		498.7	-585.9	498.7	0.0655
		498.6	167.137	181.841	-4.78051			498.6	0.05878	0.0655	0.0657		498.6	-586.934	498.6	0.0657
		498.5	168.204	181.795	-4.33178			498.5	0.05889	0.06574	0.06594		498.5	-589.407	498.5	0.06594
		498.4	168.244	182.436	-6.36481			498.4	0.05903	0.06598	0.06614		498.4	-591.904	498.4	0.06614
		498.3	167.548	183.313	-6.25041			498.3	0.05917	0.06615	0.06633		498.3	-593.484	498.3	0.06633
		498.2	167.044	183.719	-5.97231			498.2	0.05932	0.06636	0.06655		498.2	-594.006	498.2	0.06655
		498.1	166.731	184.016	-5.06463			498.1	0.0595	0.06655	0.06675		498.1	-596.002	498.1	0.06675
		498	167.553	184.22	-3.55536			498	0.05972	0.06677	0.067		498	-598.009	498	0.067
		497.9	168.008	185.393	-3.98453			497.9	0.05993	0.06693	0.06721		497.9	-598.96	497.9	0.06721
		497.8	168.919	185.857	-5.00729			497.8	0.06017	0.06713	0.06739		497.8	-600.274	497.8	0.06739
		497.7	170.47	188.052	-5.76511			497.7	0.06033	0.06733	0.0676		497.7	-602.694	497.7	0.0676
		497.6	171.067	189.836	-4.35056			497.6	0.06052	0.06758	0.06785		497.6	-604.393	497.6	0.06785
		497.5	171.655	189.958	-6.79584			497.5	0.06066	0.06776	0.06809		497.5	-607.18	497.5	0.06809
		497.4	172.289	189.746	-6.21881			497.4	0.0608	0.06802	0.06831		497.4	-610.108	497.4	0.06831
		497.3	173.024	190.529	-4.57872			497.3	0.0609	0.06822	0.06854		497.3	-611.651	497.3	0.06854
		497.2	173.737	191.601	-3.9582			497.2	0.061	0.06844	0.06873		497.2	-614.898	497.2	0.06873
		497.1	172.529	192.986	-3.65509			497.1	0.06113	0.0686	0.06894		497.1	-615.039	497.1	0.06894
		497	174.073	193.295	-3.28225			497	0.06125	0.06871	0.06913		497	-617.812	497	0.06913
		496.9	174.926	194.879	-1.77447			496.9	0.06144	0.0689	0.06933		496.9	-620.494	496.9	0.06933
		496.8	175.22	194.232	-2.5389			496.8	0.0616	0.06911	0.06954		496.8	-623.162	496.8	0.06954
		496.7	175.743	194.511	-4.24397			496.7	0.06182	0.06935	0.0697		496.7	-625.21	496.7	0.0697
		496.6	176.17	196.103	-2.72026			496.6	0.06203	0.06955	0.06991		496.6	-627.564	496.6	0.06991
		496.5	177.213	196.596	-1.10382			496.5	0.06228	0.06975	0.07011		496.5	-629.681	496.5	0.07011
		496.4	177.479	195.62	-1.33175			496.4	0.06248	0.06999	0.07031		496.4	-632.577	496.4	0.07031
		496.3	177.379	196.909	-0.64707			496.3	0.06262	0.07016	0.07053		496.3	-634.877	496.3	0.07053
		496.2	177.668	197.34	0.54719			496.2	0.06279	0.07034	0.07075		496.2	-637.461	496.2	0.07075
		496.1	177.854	198.329	0.36582			496.1	0.06297	0.07053	0.07095		496.1	-639.704	496.1	0.07095
		496	177.542	197.338	-0.15787			496	0.06316	0.07073	0.07115		496	-641.838	496	0.07115
		495.9	177.587	198.226	-0.49964			495.9	0.06335	0.07087	0.07132		495.9	-644.282	495.9	0.07132
		495.8	177.304	200.014	0.40528			495.8	0.06353	0.07101	0.07147		495.8	-647.914	495.8	0.07147
		495.7	177.683	200.314	0.49807			495.7	0.06369	0.07114	0.07159		495.7	-649.358	495.7	0.07159
		495.6	177.99	199.807	2.48899			495.6	0.06378	0.0713	0.07172		495.6	-652.204	495.6	0.07172
		495.5	179.367	201.725	1.9314			495.5	0.06395	0.0715	0.07188		495.5	-653.311	495.5	0.07188
		495.4	180.251	203.367	2.84515			495.4	0.0641	0.0717	0.07206		495.4	-654.557	495.4	0.07206
		495.3	180.365	205.16	1.34573			495.3	0.06425	0.0719	0.07233		495.3	-657.68	495.3	0.07233
		495.2	179.822	205.304	1.81037			495.2	0.06444	0.07212	0.07254		495.2	-658.596	495.2	0.07254
		495.1	180.742	205.342	3.91122			495.1	0.06464	0.07232	0.0728		495.1	-660.496	495.1	0.0728
		495	182.668	206.401	3.27557			495	0.06485	0.07256	0.07304		495	-662.976	495	0.07304
		494.9	184.455	206.977	2.82778			494.9	0.06508	0.07284	0.07326		494.9	-666.26	494.9	0.07326
		494.8	186.848	206.82	4.37054			494.8	0.06527	0.0731	0.07352		494.8	-668.32	494.8	0.07352
		494.7	187.991	208.267	2.73973			494.7	0.06545	0.07333	0.07375		494.7	-670.712	494.7	0.07375
		494.6	188.977	208.361	4.23397			494.6	0.06563	0.07356	0.07395		494.6	-672.87	494.6	0.07395
		494.5	189.661	209.086	4.24985			494.5	0.06581	0.07381	0.07414		494.5	-676.238	494.5	0.07414
		494.4	188.604	210.163	5.23102			494.4	0.066	0.07405	0.07429		494.4	-678.42	494.4	0.07429
		494.3	189.255	210.476	5.64602			494.3	0.06619	0.07423	0.07446		494.3	-680.403	494.3	0.07446
		494.2	189.862	210.268	5.77654			494.2	0.06643	0.07442	0.07466		494.2	-682.68	494.2	0.07466
		494.1	190.149	211.32	5.83498			494.1	0.06661	0.07463	0.07486		494.1	-683.028	494.1	0.07486
		494	190.745	212.343	5.56245			494	0.06683	0.07486	0.07508		494	-684.995	494	0.07508
		493.9	191.452	212.102	4.1038			493.9	0.06707	0.07509	0.07533		493.9	-685.845	493.9	0.07533
		493.8	192.57	212.094	2.70071			493.8	0.06728	0.07532	0.07557		493.8	-688.968	493.8	0.07557
		493.7	192.925	212.736	3.30183			493.7	0.06748	0.07559	0.07585		493.7	-691.562	493.7	0.07585
		493.6	193.773	213.586	2.60741			493.6	0.06765	0.07584	0.07612		493.6	-694.037	493.6	0.07612
		493.5	195.29	213.134	1.0711			493.5	0.06789	0.07603	0.07639		493.5	-697.201	493.5	0.07639
		493.4	196.631	214.481	1.42408			493.4	0.06804	0.07625	0.07669		493.4	-699.823	493.4	0.07669
		493.3	197.727	215.019	1.66596			493.3	0.06823	0.07647	0.07691		493.3	-702.149	493.3	0.07691
		493.2	198.19	215.033	0.36989			493.2	0.06839	0.07672	0.07716		493.2	-703.749	493.2	0.07716
		493.1	198.775	216.975	-0.82599			493.1	0.06859	0.0769	0.07743		493.1	-706.35	493.1	0.07743
		493	199.401	217.334	-0.98525			493	0.0688	0.07712	0.07763		493	-709.174	493	0.07763
		492.9	201.105	217.523	-2.46595			492.9	0.06905	0.07736	0.07785		492.9	-710.927	492.9	0.07785
		492.8	201.744	218.276	-3.70146			492.8	0.06931	0.07756	0.0781		492.8	-712.787	492.8	0.0781
		492.7	202.801	219.972	-4.31009			492.7	0.06952	0.07778	0.07835		492.7	-714.51	492.7	0.07835
		492.6	203.536	220.468	-5.43891			492.6	0.06966	0.07802	0.07854		492.6	-716.074	492.6	0.07854
		492.5	205.237	222.327	-5.78519			492.5	0.06988	0.07835	0.07882		492.5	-718.414	492.5	0.07882
		492.4	206.29	221.705	-6.06723			492.4	0.07011	0.07861	0.07914		492.4	-719.917	492.4	0.07914
		492.3	207.297	223.156	-5.49666			492.3	0.07033	0.07889	0.07942		492.3	-721.843	492.3	0.07942
		492.2	207.64	224.742	-5.48929			492.2	0.07056	0.07913	0.07971		492.2	-724.426	492.2	0.07971
		492.1	207.478	225.275	-4.6093			492.1	0.07074	0.07936	0.07999		492.1	-728.184	492.1	0.07999
		492	208.717	225.693	-3.37967			492	0.07096	0.07959	0.08022		492	-730.586	492	0.08022
		491.9	209.869	225.187	-2.95329			491.9	0.07119	0.07981	0.08046		491.9	-734.218	491.9	0.08046
		491.8	211.782	228.471	-4.25485			491.8	0.07141	0.08002	0.08068		491.8	-737.333	491.8	0.08068
		491.7	212.13	229.868	-5.10612			491.7	0.07162	0.08029	0.0809		491.7	-739.334	491.7	0.0809
		491.6	211.944	232.194	-4.06161			491.6	0.0718	0.08051	0.08112		491.6	-742.683	491.6	0.08112
		491.5	212.742	232.687	-4.37329			491.5	0.072	0.08071	0.08133		491.5	-744.55	491.5	0.08133
		491.4	212.901	233.339	-3.65215			491.4	0.07223	0.08097	0.08156		491.4	-747.054	491.4	0.08156
		491.3	214.12	233.596	-3.56803			491.3	0.07248	0.08121	0.08181		491.3	-750.479	491.3	0.08181
		491.2	214.013	234.021	-2.73391			491.2	0.07271	0.08143	0.08211		491.2	-752.683	491.2	0.08211
		491.1	215.502	234.585	-2.58411			491.1	0.07288	0.08167	0.08244		491.1	-754.237	491.1	0.08244
		491	216.915	234.679	-2.03628			491	0.07308	0.08192	0.08276		491	-757.721	491	0.08276
		490.9	217.445	235.609	-1.51333			490.9	0.07325	0.08222	0.08305		490.9	-759.25	490.9	0.08305
		490.8	217.807	238.185	-4.19846			490.8	0.07344	0.08248	0.08335		490.8	-761.93	490.8	0.08335
		490.7	218.42	239.136	-3.2671			490.7	0.07363	0.08274	0.08362		490.7	-765.304	490.7	0.08362
		490.6	218.311	240.706	-3.07308			490.6	0.07382	0.08298	0.08386		490.6	-768.895	490.6	0.08386
		490.5	220.289	241.234	-2.33225			490.5	0.07408	0.08327	0.08411		490.5	-772.606	490.5	0.08411
		490.4	221.087	242.181	-2.34158			490.4	0.07436	0.08351	0.08434		490.4	-773.545	490.4	0.08434
		490.3	222.366	243.17	-3.88014			490.3	0.07463	0.08377	0.08458		490.3	-776.079	490.3	0.08458
		490.2	222.772	243.8	-4.4095			490.2	0.07488	0.08403	0.08479		490.2	-778.817	490.2	0.08479
		490.1	223.977	244.319	-3.59831			490.1	0.07512	0.08435	0.085		490.1	-780.075	490.1	0.085
		490	224.097	245.942	-1.69047			490	0.0754	0.08462	0.08522		490	-783.667	490	0.08522
		489.9	224.595	246.619	-2.20447			489.9	0.0756	0.08485	0.08546		489.9	-786.486	489.9	0.08546
		489.8	225.592	247.303	-0.75629			489.8	0.07577	0.08513	0.0857		489.8	-790.572	489.8	0.0857
		489.7	225.985	246.796	-0.50072			489.7	0.07596	0.0854	0.08595		489.7	-792.43	489.7	0.08595
		489.6	226.076	249.648	0.1509			489.6	0.07614	0.08566	0.0862		489.6	-795.026	489.6	0.0862
		489.5	226.764	250.056	0.49253			489.5	0.07634	0.08596	0.08648		489.5	-799.11	489.5	0.08648
		489.4	227.377	251.616	1.33472			489.4	0.07652	0.08627	0.08676		489.4	-803.355	489.4	0.08676
		489.3	227.651	251.748	1.23224			489.3	0.07671	0.0866	0.08707		489.3	-804.159	489.3	0.08707
		489.2	228.024	253.312	0.58092			489.2	0.07691	0.08686	0.08736		489.2	-807.34	489.2	0.08736
		489.1	229.332	254.65	1.26735			489.1	0.07707	0.08715	0.08758		489.1	-809.909	489.1	0.08758
		489	230.703	255.149	-0.15326			489	0.0773	0.0874	0.08786		489	-813.532	489	0.08786
		488.9	231.684	255.916	0.02105			488.9	0.07753	0.08765	0.08815		488.9	-816.02	488.9	0.08815
		488.8	233.587	256.981	-0.15297			488.8	0.07782	0.08793	0.08839		488.8	-819.755	488.8	0.08839
		488.7	234.333	256.139	-1.3602			488.7	0.07809	0.08817	0.08858		488.7	-822.943	488.7	0.08858
		488.6	234.935	257.974	-1.24562			488.6	0.07835	0.08844	0.08879		488.6	-823.993	488.6	0.08879
		488.5	236.303	256.914	-2.12758			488.5	0.0786	0.08874	0.08908		488.5	-826.721	488.5	0.08908
		488.4	236.465	256.347	-0.91456			488.4	0.07882	0.08904	0.0893		488.4	-829.968	488.4	0.0893
		488.3	238.573	256.668	-1.25731			488.3	0.07905	0.08927	0.08955		488.3	-832.401	488.3	0.08955
		488.2	238.175	258.213	-1.57289			488.2	0.07926	0.08954	0.08983		488.2	-835.263	488.2	0.08983
		488.1	237.637	259.982	-2.49571			488.1	0.07943	0.08981	0.09012		488.1	-836.754	488.1	0.09012
		488	238.978	259.728	-2.33165			488	0.07962	0.09011	0.09043		488	-839.414	488	0.09043
		487.9	239.395	261.113	-2.94599			487.9	0.07974	0.09034	0.09062		487.9	-841.808	487.9	0.09062
		487.8	241.681	261.764	-5.25951			487.8	0.07996	0.09062	0.09092		487.8	-845.504	487.8	0.09092
		487.7	242.263	261.967	-5.1644			487.7	0.0802	0.09091	0.09123		487.7	-849.54	487.7	0.09123
		487.6	243.158	263.837	-5.51675			487.6	0.08043	0.09117	0.09153		487.6	-853.64	487.6	0.09153
		487.5	244.49	263.596	-4.93535			487.5	0.08065	0.09147	0.09185		487.5	-857.513	487.5	0.09185
		487.4	244.626	265.083	-3.13507			487.4	0.08091	0.09177	0.0921		487.4	-860.324	487.4	0.0921
		487.3	246.066	266.631	-2.90428			487.3	0.08118	0.09206	0.09238		487.3	-863.662	487.3	0.09238
		487.2	246.288	267.162	-2.55303			487.2	0.08142	0.09234	0.09266		487.2	-867.128	487.2	0.09266
		487.1	248.12	269.705	-3.27965			487.1	0.08165	0.09263	0.0929		487.1	-870.521	487.1	0.0929
		487	248.796	270.866	-3.50836			487	0.08181	0.09292	0.09313		487	-875.671	487	0.09313
		486.9	248.4	272.302	-1.08137			486.9	0.08197	0.09318	0.09342		486.9	-879.924	486.9	0.09342
		486.8	248.879	274.101	-1.36868			486.8	0.08213	0.09343	0.09371		486.8	-884.592	486.8	0.09371
		486.7	249.849	274.762	-2.56527			486.7	0.08232	0.09358	0.09399		486.7	-888.061	486.7	0.09399
		486.6	250.7	275.19	-3.9248			486.6	0.08251	0.09381	0.0943		486.6	-890.466	486.6	0.0943
		486.5	251.503	276.053	-3.02228			486.5	0.08272	0.09399	0.09463		486.5	-892.619	486.5	0.09463
		486.4	253.141	278.354	-4.14973			486.4	0.08298	0.09425	0.09499		486.4	-895.665	486.4	0.09499
		486.3	253.763	279.933	-4.02873			486.3	0.08322	0.09454	0.09532		486.3	-899.47	486.3	0.09532
		486.2	253.728	280.06	-4.06246			486.2	0.08348	0.09488	0.09555		486.2	-901.128	486.2	0.09555
		486.1	254.735	281.506	-4.72361			486.1	0.08362	0.09527	0.09581		486.1	-903.68	486.1	0.09581
		486	255.733	282.873	-6.18855			486	0.08385	0.09564	0.09605		486	-906.66	486	0.09605
		485.9	256.36	282.615	-3.78868			485.9	0.08407	0.09596	0.09628		485.9	-909.762	485.9	0.09628
		485.8	257.293	283.349	-3.41398			485.8	0.08428	0.09634	0.09651		485.8	-914.612	485.8	0.09651
		485.7	257.215	284.143	-2.85977			485.7	0.08453	0.09665	0.09683		485.7	-917.59	485.7	0.09683
		485.6	257.269	283.749	-2.82072			485.6	0.08478	0.09698	0.09707		485.6	-920.84	485.6	0.09707
		485.5	258.637	284.437	-3.31459			485.5	0.08504	0.09723	0.09739		485.5	-925.729	485.5	0.09739
		485.4	259.371	285.31	-3.785			485.4	0.08527	0.09752	0.09766		485.4	-928.832	485.4	0.09766
		485.3	261.359	285.936	-3.95773			485.3	0.08547	0.09778	0.09793		485.3	-931.457	485.3	0.09793
		485.2	262.572	287.127	-2.85047			485.2	0.08569	0.09804	0.09822		485.2	-935.323	485.2	0.09822
		485.1	262.705	289.675	-2.95003			485.1	0.08597	0.09825	0.09855		485.1	-939.724	485.1	0.09855
		485	262.73	290.34	-1.54234			485	0.08625	0.09856	0.09896		485	-945.376	485	0.09896
		484.9	263.58	290.186	-2.85902			484.9	0.08654	0.09885	0.09936		484.9	-948.764	484.9	0.09936
		484.8	265.995	290.86	-1.44698			484.8	0.0868	0.09917	0.09969		484.8	-954.089	484.8	0.09969
		484.7	265.846	292.628	-2.22028			484.7	0.08708	0.09955	0.1		484.7	-957.956	484.7	0.1
		484.6	266.789	295.531	-4.08334			484.6	0.08735	0.09993	0.1003		484.6	-959.669	484.6	0.1003
		484.5	267.504	298.452	-3.95673			484.5	0.0876	0.10036	0.10058		484.5	-963.096	484.5	0.10058
		484.4	267.146	299.597	-4.53318			484.4	0.08788	0.10073	0.10085		484.4	-967.174	484.4	0.10085
		484.3	267.923	301.195	-4.06099			484.3	0.08812	0.10103	0.10113		484.3	-970.051	484.3	0.10113
		484.2	267.672	302.386	-3.77718			484.2	0.08836	0.10131	0.10139		484.2	-972.37	484.2	0.10139
		484.1	267.616	305.899	-4.39183			484.1	0.0886	0.10156	0.10164		484.1	-976.287	484.1	0.10164
		484	269.595	306.471	-3.37851			484	0.08889	0.10178	0.10192		484	-978.894	484	0.10192
		483.9	269.795	307.495	-2.13835			483.9	0.08915	0.10206	0.1022		483.9	-981.237	483.9	0.1022
		483.8	270.879	308.61	-1.38465			483.8	0.08942	0.10235	0.10255		483.8	-984.761	483.8	0.10255
		483.7	271.335	309.065	-0.048			483.7	0.08974	0.10263	0.10291		483.7	-987.631	483.7	0.10291
		483.6	272.203	310.17	-1.00457			483.6	0.09005	0.1029	0.10325		483.6	-991.436	483.6	0.10325
		483.5	274.991	310.684	-1.86791			483.5	0.09039	0.10316	0.10366		483.5	-991.316	483.5	0.10366
		483.4	276.081	312.863	-1.53468			483.4	0.09073	0.10362	0.10408		483.4	-995.458	483.4	0.10408
		483.3	277.026	314.087	-1.67882			483.3	0.09097	0.10403	0.10446		483.3	-998.596	483.3	0.10446
		483.2	278.026	315.098	-2.29163			483.2	0.09126	0.10447	0.10477		483.2	-1003.21	483.2	0.10477
		483.1	277.873	316.545	-0.57412			483.1	0.09151	0.10488	0.10503		483.1	-1005.02	483.1	0.10503
		483	278.37	316.285	1.08504			483	0.09178	0.10523	0.10535		483	-1007.24	483	0.10535
		482.9	280.321	316.45	1.57661			482.9	0.09208	0.10556	0.10571		482.9	-1012.42	482.9	0.10571
		482.8	281.933	317.515	0.62656			482.8	0.09241	0.10579	0.106		482.8	-1016.49	482.8	0.106
		482.7	283.01	318.591	2.08223			482.7	0.09276	0.10598	0.10635		482.7	-1019.85	482.7	0.10635
		482.6	285.91	319.239	0.61328			482.6	0.09312	0.10616	0.10666		482.6	-1024.76	482.6	0.10666
		482.5	287.493	320.515	-0.33893			482.5	0.09352	0.10639	0.10698		482.5	-1026.49	482.5	0.10698
		482.4	288.692	321.637	-1.36038			482.4	0.09388	0.10663	0.10725		482.4	-1029.56	482.4	0.10725
		482.3	289.493	322.82	-2.3545			482.3	0.0942	0.10692	0.10758		482.3	-1033.18	482.3	0.10758
		482.2	289.093	325.395	-2.20364			482.2	0.09451	0.1073	0.10791		482.2	-1035.47	482.2	0.10791
		482.1	289.128	326.925	-2.33588			482.1	0.09477	0.10761	0.10832		482.1	-1039.76	482.1	0.10832
		482	288.915	328.85	-2.85086			482	0.09504	0.108	0.10874		482	-1043.54	482	0.10874
		481.9	288.907	331.623	-3.40074			481.9	0.09527	0.10837	0.10906		481.9	-1046.24	481.9	0.10906
		481.8	290.915	332.509	-1.19033			481.8	0.09547	0.10872	0.10932		481.8	-1049.11	481.8	0.10932
		481.7	291.622	334.254	-1.14108			481.7	0.09572	0.10914	0.10963		481.7	-1051.77	481.7	0.10963
		481.6	291.367	335.607	-1.43172			481.6	0.09592	0.10942	0.1099		481.6	-1055.79	481.6	0.1099
		481.5	291.931	337.299	-2.45366			481.5	0.0962	0.10967	0.11019		481.5	-1059.97	481.5	0.11019
		481.4	292.709	337.072	-1.20731			481.4	0.09648	0.1099	0.1105		481.4	-1063.14	481.4	0.1105
		481.3	293.372	334.913	-0.71867			481.3	0.09679	0.11009	0.11082		481.3	-1066.69	481.3	0.11082
		481.2	293.708	335.88	0.16695			481.2	0.0971	0.11028	0.11119		481.2	-1071.51	481.2	0.11119
		481.1	295.246	336.374	2.49818			481.1	0.09746	0.11056	0.11151		481.1	-1075.16	481.1	0.11151
		481	297.246	338.613	3.10721			481	0.09784	0.11091	0.11186		481	-1079.32	481	0.11186
		480.9	300.067	338.47	3.04885			480.9	0.09826	0.11129	0.11224		480.9	-1082.43	480.9	0.11224
		480.8	300.889	337.975	0.19482			480.8	0.09859	0.11173	0.11269		480.8	-1086.25	480.8	0.11269
		480.7	301.643	338.046	-0.58003			480.7	0.09886	0.11215	0.1131		480.7	-1090.44	480.7	0.1131
		480.6	303.106	339.33	-0.88077			480.6	0.09911	0.11253	0.11349		480.6	-1096.34	480.6	0.11349
		480.5	303.646	339.841	-1.64495			480.5	0.09935	0.11287	0.11382		480.5	-1099.75	480.5	0.11382
		480.4	303.458	342.004	-2.38544			480.4	0.09959	0.11328	0.11416		480.4	-1102.51	480.4	0.11416
		480.3	304.341	343.803	-1.31536			480.3	0.09988	0.1137	0.11452		480.3	-1107.55	480.3	0.11452
		480.2	304.839	344.386	-0.94577			480.2	0.10013	0.11407	0.11484		480.2	-1112.89	480.2	0.11484
		480.1	305.756	345.131	-0.69075			480.1	0.10043	0.11438	0.11517		480.1	-1116.47	480.1	0.11517
		480	307.217	346.12	0.01731			480	0.10077	0.11468	0.11544		480	-1120.56	480	0.11544
		479.9	308.344	347.168	0.31511			479.9	0.10104	0.11496	0.11575		479.9	-1122.95	479.9	0.11575
		479.8	309.492	346.67	-0.97239			479.8	0.10135	0.11525	0.11617		479.8	-1127.55	479.8	0.11617
		479.7	311.874	347.508	-2.82626			479.7	0.10167	0.11557	0.1165		479.7	-1132.13	479.7	0.1165
		479.6	313.97	349.78	-2.91584			479.6	0.10195	0.11593	0.11688		479.6	-1135.69	479.6	0.11688
		479.5	314.918	350.496	-1.49528			479.5	0.10224	0.11629	0.1173		479.5	-1139.3	479.5	0.1173
		479.4	315.477	353.564	-0.83468			479.4	0.10248	0.11668	0.11772		479.4	-1144.89	479.4	0.11772
		479.3	314.338	356.443	-0.21722			479.3	0.10271	0.11711	0.11814		479.3	-1148.69	479.3	0.11814
		479.2	314.644	357.805	2.8145			479.2	0.10292	0.11747	0.11851		479.2	-1153.67	479.2	0.11851
		479.1	315.033	358.707	2.58062			479.1	0.10313	0.11785	0.11887		479.1	-1156.36	479.1	0.11887
		479	315.984	359.658	2.59003			479	0.10335	0.11818	0.1192		479	-1160.78	479	0.1192
		478.9	317.085	360.674	3.83907			478.9	0.10362	0.11851	0.11957		478.9	-1164.93	478.9	0.11957
		478.8	317.835	362.187	4.18418			478.8	0.10395	0.11883	0.11985		478.8	-1168.22	478.8	0.11985
		478.7	319.86	363.262	4.25163			478.7	0.10432	0.11914	0.12021		478.7	-1172.95	478.7	0.12021
		478.6	322.718	366.488	3.27289			478.6	0.10482	0.11951	0.12076		478.6	-1177.27	478.6	0.12076
		478.5	322.909	366.871	2.87526			478.5	0.10527	0.11991	0.12116		478.5	-1180.78	478.5	0.12116
		478.4	325.273	368.882	2.77682			478.4	0.10567	0.12032	0.12152		478.4	-1186.75	478.4	0.12152
		478.3	326.549	369.61	2.70258			478.3	0.106	0.12069	0.12191		478.3	-1190.96	478.3	0.12191
		478.2	327.203	370.4	1.9834			478.2	0.10627	0.12111	0.12227		478.2	-1193.43	478.2	0.12227
		478.1	328.496	373.499	2.89318			478.1	0.10657	0.12156	0.12265		478.1	-1198.68	478.1	0.12265
		478	330.305	376.461	2.86268			478	0.10686	0.122	0.12306		478	-1202.97	478	0.12306
		477.9	332.519	376.114	2.54872			477.9	0.10712	0.12242	0.12336		477.9	-1203.02	477.9	0.12336
		477.8	333.578	377.332	2.00755			477.8	0.10735	0.1228	0.12371		477.8	-1208.04	477.8	0.12371
		477.7	334.339	378.509	2.93237			477.7	0.10757	0.12315	0.12401		477.7	-1209.93	477.7	0.12401
		477.6	335.164	380.356	2.67082			477.6	0.10776	0.1235	0.12432		477.6	-1214.25	477.6	0.12432
		477.5	337.037	381.769	6.5012			477.5	0.10798	0.12385	0.12456		477.5	-1218.45	477.5	0.12456
		477.4	337.552	384.553	6.66155			477.4	0.1083	0.12416	0.12487		477.4	-1222.6	477.4	0.12487
		477.3	338.11	387.045	5.49169			477.3	0.10862	0.12449	0.12522		477.3	-1225.11	477.3	0.12522
		477.2	340.008	387.995	4.60383			477.2	0.10901	0.12495	0.12573		477.2	-1232.6	477.2	0.12573
		477.1	340.854	390.549	3.78602			477.1	0.1093	0.1253	0.12614		477.1	-1235.39	477.1	0.12614
		477	342.374	391.228	3.06828			477	0.1096	0.12568	0.1266		477	-1238.03	477	0.1266
		476.9	343.426	391.552	3.71999			476.9	0.10993	0.12606	0.12702		476.9	-1242.78	476.9	0.12702
		476.8	344.507	392.424	5.00554			476.8	0.11028	0.12645	0.12745		476.8	-1246.84	476.8	0.12745
		476.7	345.266	393.58	5.1857			476.7	0.11064	0.12683	0.12777		476.7	-1251.71	476.7	0.12777
		476.6	346.598	395.208	3.78346			476.6	0.111	0.12724	0.12813		476.6	-1258.17	476.6	0.12813
		476.5	347.711	396.834	3.37523			476.5	0.11133	0.12763	0.12842		476.5	-1262.47	476.5	0.12842
		476.4	347.662	400.151	3.70756			476.4	0.11164	0.12794	0.12866		476.4	-1266.83	476.4	0.12866
		476.3	347.605	400.978	3.57798			476.3	0.11196	0.12822	0.12893		476.3	-1270.38	476.3	0.12893
		476.2	348.007	402.48	1.10788			476.2	0.11223	0.12849	0.1292		476.2	-1275.12	476.2	0.1292
		476.1	350.008	402.503	2.83112			476.1	0.11259	0.12887	0.12961		476.1	-1278.7	476.1	0.12961
		476	351.977	403.515	0.64619			476	0.11291	0.12919	0.12994		476	-1283.65	476	0.12994
		475.9	354.173	406.893	-0.12345			475.9	0.1132	0.12962	0.13035		475.9	-1289.59	475.9	0.13035
		475.8	354.316	409.656	0.12347			475.8	0.11351	0.1301	0.13077		475.8	-1293.11	475.8	0.13077
		475.7	356.84	411.004	1.171			475.7	0.11379	0.13058	0.13111		475.7	-1298.06	475.7	0.13111
		475.6	357.903	411.806	-0.01948			475.6	0.11412	0.13101	0.1315		475.6	-1301.46	475.6	0.1315
		475.5	359.338	413.208	-0.82165			475.5	0.11436	0.13148	0.13191		475.5	-1305.72	475.5	0.13191
		475.4	361.144	413.436	-0.90882			475.4	0.11467	0.13199	0.13229		475.4	-1308.32	475.4	0.13229
		475.3	362.565	413.394	-0.47395			475.3	0.11503	0.13247	0.13269		475.3	-1315.83	475.3	0.13269
		475.2	364.14	414.437	-0.14945			475.2	0.1153	0.13284	0.13305		475.2	-1318.9	475.2	0.13305
		475.1	364.724	415.077	-1.15147			475.1	0.11558	0.13318	0.13338		475.1	-1320.88	475.1	0.13338
		475	365.427	415.99	-1.32629			475	0.11586	0.13352	0.13378		475	-1328.36	475	0.13378
		474.9	367.732	417.347	-1.02308			474.9	0.11619	0.13388	0.1342		474.9	-1333.46	474.9	0.1342
		474.8	368.536	417.066	-1.1685			474.8	0.1165	0.13419	0.13459		474.8	-1339.27	474.8	0.13459
		474.7	369.529	418.255	0.1923			474.7	0.11683	0.13454	0.13497		474.7	-1345.12	474.7	0.13497
		474.6	371.164	420.407	-0.57327			474.6	0.1172	0.13492	0.1354		474.6	-1350.24	474.6	0.1354
		474.5	371.228	421.876	-1.85809			474.5	0.11752	0.13532	0.13584		474.5	-1356.07	474.5	0.13584
		474.4	373.711	422.017	-0.18234			474.4	0.11788	0.13573	0.13623		474.4	-1362.15	474.4	0.13623
		474.3	375.661	422.802	-1.24499			474.3	0.11833	0.13617	0.1368		474.3	-1368.56	474.3	0.1368
		474.2	377.495	423.935	-4.64726			474.2	0.11863	0.13656	0.13725		474.2	-1372.63	474.2	0.13725
		474.1	378.5	423.802	-3.60583			474.1	0.11893	0.13695	0.13766		474.1	-1377.05	474.1	0.13766
		474	379.703	424.837	-3.73149			474	0.11919	0.13741	0.13804		474	-1382.17	474	0.13804
		473.9	383.251	426.916	-4.13172			473.9	0.1195	0.13779	0.13838		473.9	-1385.71	473.9	0.13838
		473.8	384.242	427.424	-4.93527			473.8	0.11978	0.13818	0.13873		473.8	-1391.23	473.8	0.13873
		473.7	385.139	429.069	-4.93933			473.7	0.1201	0.13854	0.13901		473.7	-1397.78	473.7	0.13901
		473.6	385.966	430.96	-3.34288			473.6	0.12035	0.13892	0.13942		473.6	-1402.48	473.6	0.13942
		473.5	386.474	430.76	-3.00822			473.5	0.1206	0.13927	0.13978		473.5	-1408.98	473.5	0.13978
		473.4	387.013	432.363	-2.91044			473.4	0.12086	0.13962	0.14021		473.4	-1413.1	473.4	0.14021
		473.3	389.478	434.148	-1.20667			473.3	0.12115	0.13994	0.14063		473.3	-1416.35	473.3	0.14063
		473.2	391.118	433.749	-0.41766			473.2	0.12147	0.14035	0.1411		473.2	-1422.65	473.2	0.1411
		473.1	391.655	437.175	-0.57986			473.1	0.12177	0.1408	0.14159		473.1	-1429.15	473.1	0.14159
		473	393.924	438.217	0.65014			473	0.12213	0.14122	0.14207		473	-1433.63	473	0.14207
		472.9	395.179	439.516	-0.14901			472.9	0.12243	0.14163	0.14257		472.9	-1437.5	472.9	0.14257
		472.8	395.603	440.864	-3.24434			472.8	0.12271	0.14204	0.14293		472.8	-1441.52	472.8	0.14293
		472.7	396.017	442.645	-4.86433			472.7	0.12299	0.14245	0.14332		472.7	-1443.65	472.7	0.14332
		472.6	397.298	440.672	-4.59329			472.6	0.1233	0.14276	0.14364		472.6	-1447.75	472.6	0.14364
		472.5	398.715	442.699	-4.51989			472.5	0.12365	0.14303	0.14406		472.5	-1452.6	472.5	0.14406
		472.4	399.426	444.264	-4.89689			472.4	0.12396	0.14338	0.14452		472.4	-1457.13	472.4	0.14452
		472.3	402.069	444.686	-4.4398			472.3	0.12425	0.14372	0.14494		472.3	-1463.15	472.3	0.14494
		472.2	402.719	445.134	-3.99678			472.2	0.12457	0.14405	0.14531		472.2	-1469.28	472.2	0.14531
		472.1	400.864	446.559	-3.16274			472.1	0.12482	0.14434	0.14573		472.1	-1475.04	472.1	0.14573
		472	400.321	448.127	-2.9145			472	0.12501	0.14455	0.146		472	-1478.73	472	0.146
		471.9	401.869	448.648	-4.8365			471.9	0.12526	0.14488	0.14644		471.9	-1484.33	471.9	0.14644
		471.8	404.713	451.841	-3.44474			471.8	0.12557	0.1453	0.14683		471.8	-1490.13	471.8	0.14683
		471.7	406.576	454.531	-1.68945			471.7	0.12593	0.14569	0.14722		471.7	-1491.52	471.7	0.14722
		471.6	407.441	456.348	-4.27672			471.6	0.12629	0.14614	0.14756		471.6	-1495.51	471.6	0.14756
		471.5	409.052	459.55	-0.62368			471.5	0.12664	0.14656	0.14797		471.5	-1498.4	471.5	0.14797
		471.4	410.305	462.557	-1.90344			471.4	0.12694	0.14703	0.1483		471.4	-1503.93	471.4	0.1483
		471.3	411.593	465.045	-2.23032			471.3	0.12732	0.14745	0.14875		471.3	-1509.26	471.3	0.14875
		471.2	413.612	466.036	-2.56872			471.2	0.12764	0.14782	0.14917		471.2	-1513.96	471.2	0.14917
		471.1	414.475	468.488	-1.87542			471.1	0.12799	0.14821	0.14962		471.1	-1518.72	471.1	0.14962
		471	415.106	467.71	-1.87243			471	0.12828	0.14845	0.14995		471	-1522.58	471	0.14995
		470.9	414.004	469.485	1.16143			470.9	0.12863	0.14877	0.1503		470.9	-1529.15	470.9	0.1503
		470.8	416.199	469.329	1.33793			470.8	0.12899	0.1491	0.15069		470.8	-1534.04	470.8	0.15069
		470.7	417.938	471.967	2.02921			470.7	0.12934	0.1495	0.15096		470.7	-1540.34	470.7	0.15096
		470.6	420.005	474.178	4.06819			470.6	0.12974	0.14987	0.15124		470.6	-1544.86	470.6	0.15124
		470.5	420.402	474.292	4.65722			470.5	0.1301	0.15031	0.15147		470.5	-1550.79	470.5	0.15147
		470.4	420.946	476.708	4.26554			470.4	0.13045	0.15078	0.15177		470.4	-1556.24	470.4	0.15177
		470.3	422.665	476.845	3.44806			470.3	0.13079	0.15123	0.15209		470.3	-1561.62	470.3	0.15209
		470.2	423.723	480.23	1.56622			470.2	0.13114	0.15162	0.15251		470.2	-1565.48	470.2	0.15251
		470.1	425.823	481.965	0.20572			470.1	0.13144	0.15206	0.15292		470.1	-1568.64	470.1	0.15292
		470	427.771	482.133	0.855			470	0.13172	0.15235	0.15329		470	-1571.51	470	0.15329
		469.9	428.295	485.513	2.04477			469.9	0.13212	0.15277	0.15382		469.9	-1576.13	469.9	0.15382
		469.8	429.373	487.869	2.83773			469.8	0.13253	0.15326	0.15434		469.8	-1580.95	469.8	0.15434
		469.7	432.204	488.614	3.84976			469.7	0.1329	0.1537	0.15482		469.7	-1583.95	469.7	0.15482
		469.6	434.317	490.478	2.42725			469.6	0.13321	0.15417	0.15529		469.6	-1588.92	469.6	0.15529
		469.5	435.007	490.98	4.35537			469.5	0.13355	0.15463	0.1557		469.5	-1593.6	469.5	0.1557
		469.4	436.528	492.954	8.47412			469.4	0.13396	0.15504	0.1562		469.4	-1600.3	469.4	0.1562
		469.3	438.8	494.365	9.66476			469.3	0.13442	0.15544	0.15668		469.3	-1606.7	469.3	0.15668
		469.2	440.611	497.655	9.0367			469.2	0.13485	0.15587	0.15714		469.2	-1612.03	469.2	0.15714
		469.1	442.598	496.771	10.0804			469.1	0.13524	0.1563	0.15748		469.1	-1617.7	469.1	0.15748
		469	442.923	498.956	11.753			469	0.13564	0.15671	0.15784		469	-1624.11	469	0.15784
		468.9	444.755	501.274	11.4483			468.9	0.13601	0.15717	0.15818		468.9	-1627.67	468.9	0.15818
		468.8	446.234	502.619	12.9327			468.8	0.13641	0.15767	0.15849		468.8	-1631.32	468.8	0.15849
		468.7	448.398	505.693	13.1569			468.7	0.13683	0.15821	0.15888		468.7	-1635.38	468.7	0.15888
		468.6	451.144	508.625	12.0818			468.6	0.13724	0.15875	0.15928		468.6	-1640.13	468.6	0.15928
		468.5	453.635	510.984	15.9713			468.5	0.13764	0.15926	0.15972		468.5	-1645.41	468.5	0.15972
		468.4	452.797	512.336	15.2336			468.4	0.13802	0.15972	0.16021		468.4	-1648.54	468.4	0.16021
		468.3	454.192	514.009	13.8456			468.3	0.13839	0.1601	0.1607		468.3	-1655.57	468.3	0.1607
		468.2	455.797	514.222	14.5174			468.2	0.13883	0.16051	0.16119		468.2	-1661.31	468.2	0.16119
		468.1	455.822	516.525	13.1263			468.1	0.13921	0.16094	0.16157		468.1	-1667.27	468.1	0.16157
		468	457.81	517.813	12.4266			468	0.13958	0.16138	0.162		468	-1671.68	468	0.162
		467.9	459.238	520.133	12.4186			467.9	0.13989	0.16181	0.16231		467.9	-1675.43	467.9	0.16231
		467.8	460.74	522.655	11.1826			467.8	0.14026	0.16233	0.16256		467.8	-1681.58	467.8	0.16256
		467.7	462.604	525.905	10.3232			467.7	0.14065	0.16295	0.16286		467.7	-1687.11	467.7	0.16286
		467.6	464.456	526.813	8.90762			467.6	0.141	0.16356	0.16313		467.6	-1692.19	467.6	0.16313
		467.5	465.203	530.848	7.43108			467.5	0.14137	0.16416	0.16357		467.5	-1697.72	467.5	0.16357
		467.4	465.287	531.159	7.15917			467.4	0.14172	0.16469	0.16398		467.4	-1703.41	467.4	0.16398
		467.3	465.783	532.37	6.33714			467.3	0.14206	0.1652	0.16458		467.3	-1708.78	467.3	0.16458
		467.2	466.311	534.138	4.78876			467.2	0.14236	0.1657	0.16518		467.2	-1712.99	467.2	0.16518
		467.1	468.953	536.489	5.03421			467.1	0.14278	0.16611	0.16582		467.1	-1717.55	467.1	0.16582
		467	469.941	538.565	3.28372			467	0.14314	0.16657	0.16642		467	-1720.79	467	0.16642
		466.9	471.485	539.071	3.88387			466.9	0.14357	0.16699	0.16703		466.9	-1726.21	466.9	0.16703
		466.8	472.802	540.38	3.63479			466.8	0.14401	0.16741	0.16752		466.8	-1732.72	466.8	0.16752
		466.7	474.315	544.397	3.15335			466.7	0.14442	0.16789	0.16798		466.7	-1738.04	466.7	0.16798
		466.6	477.106	545.764	1.47512			466.6	0.14476	0.1684	0.16841		466.6	-1744.12	466.6	0.16841
		466.5	477.987	546.53	0.39756			466.5	0.14508	0.16888	0.16884		466.5	-1749.04	466.5	0.16884
		466.4	478.499	547.267	0.06946			466.4	0.14541	0.16937	0.16922		466.4	-1754.78	466.4	0.16922
		466.3	479.299	550.567	2.31937			466.3	0.14576	0.16996	0.16959		466.3	-1761.33	466.3	0.16959
		466.2	480.347	553.313	0.19519			466.2	0.14609	0.17057	0.16994		466.2	-1766.45	466.2	0.16994
		466.1	481.532	555.806	-2.42099			466.1	0.14638	0.1712	0.17033		466.1	-1771.79	466.1	0.17033
		466	482.604	559.473	-5.20445			466	0.14667	0.17183	0.17072		466	-1777.33	466	0.17072
		465.9	484.148	560.531	-5.17753			465.9	0.14702	0.17244	0.1712		465.9	-1783.36	465.9	0.1712
		465.8	486.52	564.174	-3.94433			465.8	0.14738	0.17299	0.17175		465.8	-1787.53	465.8	0.17175
		465.7	488.206	564.475	-6.11189			465.7	0.14775	0.17345	0.17232		465.7	-1793.85	465.7	0.17232
		465.6	488.922	566.454	-5.98646			465.6	0.14819	0.17388	0.1729		465.6	-1798.83	465.6	0.1729
		465.5	491.668	569.253	-7.84641			465.5	0.1486	0.17426	0.17353		465.5	-1805.29	465.5	0.17353
		465.4	492.932	569.052	-6.55781			465.4	0.14897	0.17467	0.17406		465.4	-1812.68	465.4	0.17406
		465.3	494.908	571.542	-6.59439			465.3	0.14933	0.17509	0.17464		465.3	-1819.56	465.3	0.17464
		465.2	496.589	571.945	-9.89468			465.2	0.14972	0.17556	0.17513		465.2	-1824.34	465.2	0.17513
		465.1	498.564	572.452	-10.1126			465.1	0.15003	0.17604	0.17563		465.1	-1832.91	465.1	0.17563
		465	498.884	573.847	-8.53785			465	0.15035	0.17661	0.17614		465	-1840	465	0.17614
		464.9	500.343	577.604	-9.92346			464.9	0.15055	0.17717	0.17667		464.9	-1847.04	464.9	0.17667
		464.8	502.353	579.707	-9.62484			464.8	0.15085	0.17768	0.1772		464.8	-1851.28	464.8	0.1772
		464.7	503.744	580.628	-8.05392			464.7	0.15118	0.17814	0.1777		464.7	-1857.1	464.7	0.1777
		464.6	505.114	580.346	-6.20945			464.6	0.15154	0.17869	0.17826		464.6	-1863.4	464.6	0.17826
		464.5	506.866	582.79	-6.16428			464.5	0.1519	0.17917	0.17891		464.5	-1869.6	464.5	0.17891
		464.4	507.054	586.299	-6.88356			464.4	0.15229	0.17965	0.17954		464.4	-1875.93	464.4	0.17954
		464.3	507.854	588.378	-5.87575			464.3	0.15265	0.18011	0.18021		464.3	-1880.83	464.3	0.18021
		464.2	510.902	589.503	-7.37			464.2	0.15299	0.18047	0.1808		464.2	-1886.7	464.2	0.1808
		464.1	511.797	593.048	-5.47772			464.1	0.15341	0.18088	0.18144		464.1	-1892.79	464.1	0.18144
		464	514.577	596.446	-5.9212			464	0.15383	0.1812	0.18197		464	-1895.08	464	0.18197
		463.9	515.983	596.61	-4.26959			463.9	0.15419	0.18151	0.18234		463.9	-1898.19	463.9	0.18234
		463.8	520.059	596.473	-2.3632			463.8	0.15466	0.18193	0.18282		463.8	-1904.89	463.8	0.18282
		463.7	523.059	599.741	-2.87189			463.7	0.15505	0.18241	0.18322		463.7	-1912.92	463.7	0.18322
		463.6	522.46	601.154	-1.12416			463.6	0.15548	0.18295	0.18373		463.6	-1920.73	463.6	0.18373
		463.5	524.716	602.35	-1.53276			463.5	0.15581	0.1836	0.18421		463.5	-1926.95	463.5	0.18421
		463.4	527.584	605.129	-2.4985			463.4	0.15618	0.18423	0.18467		463.4	-1934.04	463.4	0.18467
		463.3	528.048	607.279	-0.82012			463.3	0.15649	0.18486	0.18517		463.3	-1939.8	463.3	0.18517
		463.2	527.711	609.635	-1.38488			463.2	0.15683	0.18541	0.18568		463.2	-1945.62	463.2	0.18568
		463.1	529.814	614.287	-0.12843			463.1	0.15718	0.18592	0.18624		463.1	-1951.5	463.1	0.18624
		463	531.026	616.015	-1.48136			463	0.15748	0.18633	0.18681		463	-1957.63	463	0.18681
		462.9	532.332	618.85	-2.95007			462.9	0.15782	0.18673	0.18736		462.9	-1965.19	462.9	0.18736
		462.8	534.454	617.719	-1.77107			462.8	0.1581	0.18697	0.18775		462.8	-1968.52	462.8	0.18775
		462.7	536.279	617.952	-1.89719			462.7	0.15851	0.18724	0.18817		462.7	-1974.62	462.7	0.18817
		462.6	537.985	617.59	-1.56201			462.6	0.15898	0.18758	0.18857		462.6	-1982.2	462.6	0.18857
		462.5	539.031	618.8	-2.43724			462.5	0.1593	0.188	0.18902		462.5	-1986.79	462.5	0.18902
		462.4	540.618	620.236	-5.68347			462.4	0.15965	0.18849	0.18939		462.4	-1990.49	462.4	0.18939
		462.3	541.591	622.766	-5.92164			462.3	0.15996	0.18913	0.18981		462.3	-1995.09	462.3	0.18981
		462.2	541.202	624.978	-5.26649			462.2	0.16024	0.18974	0.19029		462.2	-2001.89	462.2	0.19029
		462.1	542.401	629.244	-6.2386			462.1	0.16055	0.19039	0.19091		462.1	-2006.73	462.1	0.19091
		462	544.837	631.485	-6.14925			462	0.16094	0.19101	0.19158		462	-2012.51	462	0.19158
		461.9	546.802	633.073	-4.08149			461.9	0.16138	0.19156	0.19225		461.9	-2019.18	461.9	0.19225
		461.8	546.861	635.461	-5.20323			461.8	0.16184	0.19209	0.19288		461.8	-2026.6	461.8	0.19288
		461.7	550.179	638.077	-5.73746			461.7	0.16238	0.19243	0.19342		461.7	-2031.66	461.7	0.19342
		461.6	552.648	638.683	-7.24418			461.6	0.16285	0.1928	0.19397		461.6	-2036.03	461.6	0.19397
		461.5	554.009	638.696	-7.43221			461.5	0.16334	0.19307	0.19435		461.5	-2041.64	461.5	0.19435
		461.4	555.372	639.396	-6.52297			461.4	0.16365	0.19336	0.19469		461.4	-2046.48	461.4	0.19469
		461.3	556.47	641.075	-7.17398			461.3	0.16408	0.19374	0.19518		461.3	-2052.12	461.3	0.19518
		461.2	559.006	642.866	-6.99069			461.2	0.16446	0.1942	0.19564		461.2	-2057.37	461.2	0.19564
		461.1	560.866	643.989	-7.46917			461.1	0.16492	0.19473	0.19606		461.1	-2060.58	461.1	0.19606
		461	563.372	643.846	-4.54909			461	0.16533	0.19536	0.19649		461	-2064.73	461	0.19649
		460.9	565.067	646.677	-4.10192			460.9	0.16578	0.19603	0.19694		460.9	-2068.68	460.9	0.19694
		460.8	566.41	649.457	-3.0998			460.8	0.1662	0.19674	0.19745		460.8	-2075.86	460.8	0.19745
		460.7	569.185	650.398	-1.71563			460.7	0.16661	0.19743	0.19797		460.7	-2081.14	460.7	0.19797
		460.6	569.383	652.404	-1.64538			460.6	0.16709	0.19815	0.19856		460.6	-2087.42	460.6	0.19856
		460.5	571.258	656.62	-5.39621			460.5	0.16754	0.19871	0.19916		460.5	-2093.42	460.5	0.19916
		460.4	569.534	659.859	-4.96868			460.4	0.16799	0.19918	0.19985		460.4	-2096.4	460.4	0.19985
		460.3	571.889	659.367	-3.51489			460.3	0.16848	0.19957	0.2006		460.3	-2100.61	460.3	0.2006
		460.2	575.122	662.081	-4.22162			460.2	0.16895	0.19997	0.20116		460.2	-2102.25	460.2	0.20116
		460.1	575.872	663.31	-1.58207			460.1	0.16944	0.20037	0.20164		460.1	-2107.74	460.1	0.20164
		460	577.769	663.463	-2.23586			460	0.16994	0.20082	0.20211		460	-2114.04	460	0.20211
		459.9	580.066	663.469	-2.48269			459.9	0.17038	0.20123	0.20257		459.9	-2120.95	459.9	0.20257
		459.8	582.543	664.205	-4.28464			459.8	0.17085	0.2017	0.20298		459.8	-2128.16	459.8	0.20298
		459.7	583.139	661.886	-4.78402			459.7	0.17138	0.20218	0.20341		459.7	-2133.42	459.7	0.20341
		459.6	584.949	662.388	-7.40094			459.6	0.17193	0.20269	0.20378		459.6	-2139.18	459.6	0.20378
		459.5	587.059	664.512	-6.74878			459.5	0.17248	0.20328	0.20432		459.5	-2145.03	459.5	0.20432
		459.4	589.489	667.604	-6.99746			459.4	0.17303	0.20393	0.20497		459.4	-2153.89	459.4	0.20497
		459.3	591.539	671.408	-5.45058			459.3	0.17359	0.20461	0.20574		459.3	-2156.18	459.3	0.20574
		459.2	593.101	674.289	-4.08164			459.2	0.17419	0.20526	0.20645		459.2	-2163.59	459.2	0.20645
		459.1	595.157	676.656	-2.24155			459.1	0.17478	0.20584	0.20711		459.1	-2171.38	459.1	0.20711
		459	597.941	678.468	-1.24889			459	0.17537	0.2063	0.20775		459	-2178.12	459	0.20775
		458.9	601.486	683.783	1.47655			458.9	0.17612	0.20685	0.20849		458.9	-2183.63	458.9	0.20849
		458.8	605.28	682.371	-0.10437			458.8	0.17667	0.20724	0.20892		458.8	-2190.51	458.8	0.20892
		458.7	605.388	685.831	-1.49967			458.7	0.17715	0.2077	0.2093		458.7	-2198.94	458.7	0.2093
		458.6	605.111	689.126	-2.37387			458.6	0.17754	0.20827	0.2096		458.6	-2205.51	458.6	0.2096
		458.5	607.354	689.21	-2.03346			458.5	0.17783	0.20887	0.20996		458.5	-2212.96	458.5	0.20996
		458.4	607.411	689.484	-0.81914			458.4	0.17813	0.20962	0.21037		458.4	-2216.96	458.4	0.21037
		458.3	607.677	693.019	1.16346			458.3	0.17842	0.2104	0.21082		458.3	-2223.79	458.3	0.21082
		458.2	608.805	698.841	4.12454			458.2	0.17879	0.21121	0.21136		458.2	-2228.12	458.2	0.21136
		458.1	611.084	701.182	4.69547			458.1	0.17928	0.21197	0.21199		458.1	-2232	458.1	0.21199
		458	613.736	703.634	4.36702			458	0.17982	0.21276	0.21258		458	-2239.2	458	0.21258
		457.9	614.414	707.412	1.34649			457.9	0.1804	0.21347	0.21327		457.9	-2246.91	457.9	0.21327
		457.8	617.236	709.577	1.49795			457.8	0.18102	0.21412	0.21395		457.8	-2254.29	457.8	0.21395
		457.7	619.777	712.841	-0.65095			457.7	0.18158	0.21467	0.21453		457.7	-2264.13	457.7	0.21453
		457.6	622.202	717.187	-1.07198			457.6	0.18222	0.21516	0.21526		457.6	-2274.37	457.6	0.21526
		457.5	624.706	717.786	-2.13324			457.5	0.18268	0.21554	0.21583		457.5	-2278.98	457.5	0.21583
		457.4	625.137	718.122	-0.708			457.4	0.18307	0.21589	0.21632		457.4	-2285.34	457.4	0.21632
		457.3	626.799	720.043	0.50283			457.3	0.18342	0.21634	0.21679		457.3	-2292.31	457.3	0.21679
		457.2	626.052	719.835	5.17506			457.2	0.18371	0.21686	0.21729		457.2	-2299.81	457.2	0.21729
		457.1	628.361	722.972	4.67586			457.1	0.18405	0.21761	0.21775		457.1	-2308.55	457.1	0.21775
		457	630.398	726.97	6.0783			457	0.1844	0.21838	0.21815		457	-2315.95	457	0.21815
		456.9	631.208	729.559	7.56122			456.9	0.18485	0.21915	0.21863		456.9	-2325.11	456.9	0.21863
		456.8	632.979	729.398	6.2322			456.8	0.18532	0.21985	0.21925		456.8	-2330.54	456.8	0.21925
		456.7	633.523	732.928	9.6929			456.7	0.18585	0.22053	0.21986		456.7	-2334.66	456.7	0.21986
		456.6	635.462	736.322	10.7126			456.6	0.1866	0.22134	0.22065		456.6	-2342.71	456.6	0.22065
		456.5	637.793	741.576	14.389			456.5	0.1872	0.22201	0.22119		456.5	-2350.28	456.5	0.22119
		456.4	638.881	745.037	15.2079			456.4	0.18774	0.22261	0.22183		456.4	-2359.98	456.4	0.22183
		456.3	640.155	747.654	15.8482			456.3	0.1883	0.22317	0.22251		456.3	-2365.72	456.3	0.22251
		456.2	643.332	748.829	15.834			456.2	0.18876	0.22363	0.22321		456.2	-2370.46	456.2	0.22321
		456.1	643.841	749.944	13.3971			456.1	0.18916	0.22405	0.22391		456.1	-2373.43	456.1	0.22391
		456	645.624	749.418	15.8598			456	0.18946	0.22453	0.22452		456	-2380.3	456	0.22452
		455.9	648.95	753.239	16.0154			455.9	0.18982	0.22518	0.22535		455.9	-2387.01	455.9	0.22535
		455.8	650.723	753.947	16.7789			455.8	0.1902	0.22581	0.22601		455.8	-2392.46	455.8	0.22601
		455.7	651.097	754.766	12.3521			455.7	0.19055	0.22647	0.22662		455.7	-2399.76	455.7	0.22662
		455.6	651.553	758.916	12.1529			455.6	0.19098	0.22729	0.22729		455.6	-2409.5	455.6	0.22729
		455.5	653.955	759.846	13.374			455.5	0.19144	0.22811	0.22805		455.5	-2413.85	455.5	0.22805
		455.4	657.319	763.06	13.8202			455.4	0.19203	0.22884	0.22868		455.4	-2419.68	455.4	0.22868
		455.3	660.821	764.253	10.5342			455.3	0.1926	0.22954	0.22941		455.3	-2422.75	455.3	0.22941
		455.2	662.148	770.095	11.1602			455.2	0.19341	0.23024	0.23022		455.2	-2430.24	455.2	0.23022
		455.1	663.292	770.695	11.0299			455.1	0.19402	0.23075	0.23085		455.1	-2439.03	455.1	0.23085
		455	665.125	772.463	11.645			455	0.19463	0.23131	0.23156		455	-2445.36	455	0.23156
		454.9	667.127	775.519	8.27644			454.9	0.19518	0.23184	0.23222		454.9	-2451.41	454.9	0.23222
		454.8	669.693	776.341	6.1198			454.8	0.19564	0.23233	0.23298		454.8	-2458.39	454.8	0.23298
		454.7	671.307	781.674	6.33043			454.7	0.19605	0.23277	0.23371		454.7	-2465.65	454.7	0.23371
		454.6	673.607	782.578	8.57353			454.6	0.19636	0.23323	0.2344		454.6	-2471.59	454.6	0.2344
		454.5	675.192	784.398	10.3538			454.5	0.19672	0.23379	0.23515		454.5	-2478.29	454.5	0.23515
		454.4	677.957	786.177	10.3267			454.4	0.19734	0.23467	0.23611		454.4	-2485.09	454.4	0.23611
		454.3	681.499	791.062	9.07166			454.3	0.19801	0.23552	0.2368		454.3	-2492.04	454.3	0.2368
		454.2	684.409	795.389	6.85474			454.2	0.19864	0.2364	0.2376		454.2	-2499	454.2	0.2376
		454.1	687.977	798.452	6.55661			454.1	0.19933	0.23717	0.23835		454.1	-2503.99	454.1	0.23835
		454	691.886	802.927	5.68386			454	0.20001	0.23802	0.23904		454	-2509.51	454	0.23904
		453.9	695.853	805.504	3.72863			453.9	0.20069	0.23871	0.23974		453.9	-2514.33	453.9	0.23974
		453.8	697.04	808.435	3.36735			453.8	0.20137	0.23929	0.24049		453.8	-2519.22	453.8	0.24049
		453.7	701.908	812.148	3.20723			453.7	0.20217	0.24	0.24141		453.7	-2525.8	453.7	0.24141
		453.6	704.826	816.281	3.81658			453.6	0.2027	0.24054	0.24209		453.6	-2532.42	453.6	0.24209
		453.5	708.271	819.148	-1.45943			453.5	0.2032	0.24109	0.24273		453.5	-2541.21	453.5	0.24273
		453.4	710.682	821.74	-5.32095			453.4	0.20364	0.24164	0.24326		453.4	-2547.22	453.4	0.24326
		453.3	713.784	824.723	-7.60919			453.3	0.20409	0.24222	0.24382		453.3	-2554.69	453.3	0.24382
		453.2	715.901	825.771	-9.55812			453.2	0.20436	0.24287	0.24447		453.2	-2556.65	453.2	0.24447
		453.1	720.271	829.428	-8.57359			453.1	0.20465	0.24353	0.24508		453.1	-2564.59	453.1	0.24508
		453	722.629	833.523	-6.08257			453	0.20506	0.24429	0.24578		453	-2572.52	453	0.24578
		452.9	724.42	838.083	-6.81881			452.9	0.20546	0.24503	0.24645		452.9	-2579.69	452.9	0.24645
		452.8	726.927	841.831	-9.81435			452.8	0.20609	0.24594	0.2473		452.8	-2589.1	452.8	0.2473
		452.7	727.832	845.979	-10.1896			452.7	0.20669	0.2467	0.24794		452.7	-2596.58	452.7	0.24794
		452.6	729.795	849.767	-12.9523			452.6	0.20733	0.24734	0.24866		452.6	-2602.53	452.6	0.24866
		452.5	733.048	853.091	-9.82059			452.5	0.20797	0.24795	0.24939		452.5	-2608.3	452.5	0.24939
		452.4	738.993	854.171	-9.42961			452.4	0.20862	0.24843	0.2501		452.4	-2613.83	452.4	0.2501
		452.3	742.583	856.944	-9.62413			452.3	0.20923	0.24894	0.2508		452.3	-2618.72	452.3	0.2508
		452.2	744.55	859.61	-9.45068			452.2	0.20977	0.2494	0.25151		452.2	-2624.98	452.2	0.25151
		452.1	746.446	864.572	-6.13966			452.1	0.21031	0.24993	0.25221		452.1	-2633	452.1	0.25221
		452	749.369	866.844	-7.23443			452	0.21077	0.25061	0.2528		452	-2640.25	452	0.2528
		451.9	752.709	869.712	-6.76553			451.9	0.21121	0.25132	0.2535		451.9	-2650.5	451.9	0.2535
		451.8	755.217	871.483	-7.66925			451.8	0.21164	0.25209	0.25418		451.8	-2659.56	451.8	0.25418
		451.7	757.528	872.843	-10.0825			451.7	0.212	0.25281	0.25484		451.7	-2672.12	451.7	0.25484
		451.6	759.88	878.064	-8.08907			451.6	0.21246	0.25368	0.25541		451.6	-2680.93	451.6	0.25541
		451.5	759.524	880.651	-8.26593			451.5	0.21297	0.25447	0.25597		451.5	-2686.65	451.5	0.25597
		451.4	763.104	884.415	-9.92002			451.4	0.21363	0.25532	0.25661		451.4	-2693.18	451.4	0.25661
		451.3	764.625	889.342	-11.0665			451.3	0.21422	0.25606	0.25725		451.3	-2701.89	451.3	0.25725
		451.2	766.637	890.796	-11.9759			451.2	0.21477	0.25676	0.25795		451.2	-2708.54	451.2	0.25795
		451.1	768.381	894.654	-10.4354			451.1	0.21519	0.25731	0.25862		451.1	-2715.69	451.1	0.25862
		451	769.256	897.834	-10.2893			451	0.21561	0.25783	0.25929		451	-2723.5	451	0.25929
		450.9	771.017	898.173	-9.72814			450.9	0.2161	0.2583	0.25988		450.9	-2733.68	450.9	0.25988
		450.8	773.716	900.588	-11.1508			450.8	0.21658	0.25876	0.26049		450.8	-2743.71	450.8	0.26049
		450.7	776.335	904.007	-12.0015			450.7	0.21706	0.25926	0.26112		450.7	-2753.69	450.7	0.26112
		450.6	777.804	906.399	-10.1381			450.6	0.21752	0.25984	0.26176		450.6	-2762.89	450.6	0.26176
		450.5	781.102	910.573	-12.2268			450.5	0.21791	0.26049	0.26236		450.5	-2772.79	450.5	0.26236
		450.4	782.081	912.999	-12.065			450.4	0.21826	0.26102	0.26287		450.4	-2780.1	450.4	0.26287
		450.3	783.232	914.372	-11.182			450.3	0.2187	0.26171	0.26341		450.3	-2785.32	450.3	0.26341
		450.2	784.334	919.039	-10.0173			450.2	0.21918	0.26244	0.26408		450.2	-2790.01	450.2	0.26408
		450.1	787.154	920.592	-9.20214			450.1	0.21968	0.2633	0.2649		450.1	-2796.79	450.1	0.2649
		450	788.987	920.471	-7.93953			450	0.22025	0.26414	0.26579		450	-2801.59	450	0.26579
		449.9	790.24	925.862	-5.80998			449.9	0.22093	0.26491	0.26655		449.9	-2806.48	449.9	0.26655
		449.8	792.802	926.463	-5.18844			449.8	0.22169	0.26563	0.26723		449.8	-2815.66	449.8	0.26723
		449.7	795.126	926.148	-6.18045			449.7	0.22236	0.2662	0.26778		449.7	-2823.89	449.7	0.26778
		449.6	796.211	928.461	-5.06142			449.6	0.22307	0.26686	0.26829		449.6	-2835.66	449.6	0.26829
		449.5	799.572	930.913	0.18871			449.5	0.22371	0.26744	0.26872		449.5	-2847.37	449.5	0.26872
		449.4	803.635	933.943	-0.2958			449.4	0.22431	0.26807	0.26935		449.4	-2856.44	449.4	0.26935
		449.3	805.737	936.414	0.19676			449.3	0.22484	0.26875	0.27		449.3	-2865.87	449.3	0.27
		449.2	808.874	938.916	1.36118			449.2	0.22536	0.26952	0.27066		449.2	-2877.52	449.2	0.27066
		449.1	808.08	941.875	1.77296			449.1	0.2259	0.2703	0.27136		449.1	-2885.85	449.1	0.27136
		449	809.262	944.977	2.5628			449	0.22643	0.27113	0.27199		449	-2898.19	449	0.27199
		448.9	810.324	948.683	1.15439			448.9	0.22697	0.272	0.27262		448.9	-2905.17	448.9	0.27262
		448.8	812.846	951.658	0.65552			448.8	0.22746	0.27288	0.27332		448.8	-2914.08	448.8	0.27332
		448.7	814.476	954.013	3.60715			448.7	0.22805	0.27362	0.27412		448.7	-2920.64	448.7	0.27412
		448.6	817.705	955.38	2.66327			448.6	0.2286	0.27436	0.27497		448.6	-2924.99	448.6	0.27497
		448.5	821.565	961.781	0.08218			448.5	0.22916	0.2751	0.27586		448.5	-2930.53	448.5	0.27586
		448.4	823.669	963.71	0.89901			448.4	0.2298	0.27578	0.27671		448.4	-2934.23	448.4	0.27671
		448.3	825.623	965.906	-1.85492			448.3	0.23051	0.27642	0.27774		448.3	-2940.57	448.3	0.27774
		448.2	829.036	966.341	-1.49191			448.2	0.23115	0.27693	0.27865		448.2	-2949.25	448.2	0.27865
		448.1	829.92	967.674	-1.68767			448.1	0.2317	0.27742	0.27945		448.1	-2960.47	448.1	0.27945
		448	831.033	969.407	-0.4447			448	0.23224	0.27786	0.28019		448	-2969.68	448	0.28019
		447.9	834.303	971.565	-0.94091			447.9	0.23284	0.27833	0.2808		447.9	-2978.13	447.9	0.2808
		447.8	838.172	976.619	-0.85115			447.8	0.23345	0.27895	0.28138		447.8	-2988.55	447.8	0.28138
		447.7	839.062	977.375	1.94869			447.7	0.23399	0.27969	0.28201		447.7	-2994.08	447.7	0.28201
		447.6	842.356	981.568	1.98369			447.6	0.23447	0.28061	0.2826		447.6	-3000.87	447.6	0.2826
		447.5	842.763	985.289	2.62809			447.5	0.23482	0.28154	0.28334		447.5	-3008.91	447.5	0.28334
		447.4	844.095	988.388	-0.94321			447.4	0.23514	0.28256	0.28397		447.4	-3017.21	447.4	0.28397
		447.3	845.117	992.018	-2.60079			447.3	0.23555	0.28349	0.28462		447.3	-3025.14	447.3	0.28462
		447.2	848.437	994.815	-1.37729			447.2	0.23608	0.28444	0.28525		447.2	-3031.28	447.2	0.28525
		447.1	848.917	997.513	-1.84737			447.1	0.23686	0.28572	0.28625		447.1	-3040.72	447.1	0.28625
		447	853.072	1002.5	0.30874			447	0.23754	0.28653	0.28713		447	-3051.75	447	0.28713
		446.9	858.498	1003.96	1.92671			446.9	0.23821	0.2873	0.28795		446.9	-3063.77	446.9	0.28795
		446.8	860.857	1009.03	3.75535			446.8	0.23884	0.28792	0.28871		446.8	-3071.81	446.8	0.28871
		446.7	863.416	1011.68	5.71612			446.7	0.23944	0.28856	0.28943		446.7	-3081.7	446.7	0.28943
		446.6	867.485	1014.98	4.46639			446.6	0.24009	0.28922	0.29021		446.6	-3093.7	446.6	0.29021
		446.5	868.611	1019.26	0.5079			446.5	0.24068	0.28991	0.29105		446.5	-3100.85	446.5	0.29105
		446.4	869.186	1025.21	0.46764			446.4	0.24121	0.29073	0.29191		446.4	-3110.17	446.4	0.29191
		446.3	871.039	1029.11	0.89257			446.3	0.24165	0.29153	0.29276		446.3	-3115.37	446.3	0.29276
		446.2	872.368	1031.82	-0.86709			446.2	0.24208	0.29246	0.29358		446.2	-3122.54	446.2	0.29358
		446.1	875.252	1035.68	-3.04624			446.1	0.24253	0.29338	0.29427		446.1	-3129.03	446.1	0.29427
		446	878.355	1039.66	-2.72778			446	0.24293	0.29427	0.29491		446	-3136.48	446	0.29491
		445.9	879.675	1042.98	-4.57163			445.9	0.24338	0.29505	0.29562		445.9	-3143.35	445.9	0.29562
		445.8	882.976	1045.58	-5.90052			445.8	0.24381	0.29578	0.2963		445.8	-3152.21	445.8	0.2963
		445.7	886.402	1048.68	-4.54705			445.7	0.24424	0.29636	0.2971		445.7	-3159.8	445.7	0.2971
		445.6	888.714	1050.15	-3.45285			445.6	0.24472	0.29685	0.298		445.6	-3171.01	445.6	0.298
		445.5	892.016	1050.45	-6.43709			445.5	0.24536	0.29736	0.29885		445.5	-3180.2	445.5	0.29885
		445.4	894.898	1052.71	-9.58803			445.4	0.24605	0.29791	0.29962		445.4	-3188.06	445.4	0.29962
		445.3	897.113	1055.08	-8.28211			445.3	0.24676	0.29844	0.30034		445.3	-3198.3	445.3	0.30034
		445.2	900.196	1055.27	-7.23287			445.2	0.24754	0.299	0.3011		445.2	-3207.57	445.2	0.3011
		445.1	902.054	1057.79	-4.67826			445.1	0.24823	0.29959	0.30173		445.1	-3217.78	445.1	0.30173
		445	905.995	1058.94	-2.11343			445	0.24881	0.30027	0.30232		445	-3225.47	445	0.30232
		444.9	907.344	1061.51	-0.56032			444.9	0.24936	0.30115	0.30287		444.9	-3231.03	444.9	0.30287
		444.8	911.557	1064.45	0.92368			444.8	0.2498	0.30212	0.30351		444.8	-3234.54	444.8	0.30351
		444.7	913.395	1067.8	3.26489			444.7	0.25019	0.30309	0.30418		444.7	-3240.19	444.7	0.30418
		444.6	913.445	1072.97	2.05355			444.6	0.25051	0.3041	0.30486		444.6	-3247.47	444.6	0.30486
		444.5	912.606	1073.56	-0.42758			444.5	0.25093	0.30502	0.30555		444.5	-3254.08	444.5	0.30555
		444.4	915.201	1076.51	-3.57588			444.4	0.25147	0.30578	0.30621		444.4	-3261.37	444.4	0.30621
		444.3	916.5	1081.67	-6.16136			444.3	0.2521	0.30634	0.30705		444.3	-3269.23	444.3	0.30705
		444.2	919.326	1082.28	-6.60562			444.2	0.25286	0.30685	0.30788		444.2	-3276.19	444.2	0.30788
		444.1	922.153	1083.74	-3.30807			444.1	0.25364	0.30733	0.30881		444.1	-3284.16	444.1	0.30881
		444	925.394	1084.99	-3.81202			444	0.25438	0.3078	0.30976		444	-3292.89	444	0.30976
		443.9	926.633	1086.51	-3.94261			443.9	0.25497	0.30834	0.31077		443.9	-3301.98	443.9	0.31077
		443.8	932.595	1089.13	-2.38079			443.8	0.25549	0.30882	0.31163		443.8	-3311.88	443.8	0.31163
		443.7	935.866	1090.22	-2.25378			443.7	0.2559	0.30935	0.31247		443.7	-3324.87	443.7	0.31247
		443.6	936.623	1094.01	-0.54564			443.6	0.25626	0.30995	0.31325		443.6	-3333.2	443.6	0.31325
		443.5	938.292	1095.59	-2.0732			443.5	0.25647	0.31044	0.31383		443.5	-3340.82	443.5	0.31383
		443.4	940.393	1098.63	-2.4042			443.4	0.2568	0.31109	0.31459		443.4	-3352.71	443.4	0.31459
		443.3	941.384	1103.95	-3.66025			443.3	0.25715	0.3118	0.31532		443.3	-3363.8	443.3	0.31532
		443.2	943.374	1107.96	-4.05121			443.2	0.25758	0.31251	0.316		443.2	-3373.39	443.2	0.316
		443.1	946.014	1109.08	-5.07212			443.1	0.25801	0.31339	0.31659		443.1	-3381.87	443.1	0.31659
		443	950.706	1111.21	-6.32491			443	0.25859	0.31428	0.31715		443	-3389.57	443	0.31715
		442.9	952.865	1112.65	-4.43809			442.9	0.25919	0.31512	0.31781		442.9	-3399.37	442.9	0.31781
		442.8	954.086	1117.58	-1.59762			442.8	0.25973	0.31579	0.31861		442.8	-3409.06	442.8	0.31861
		442.7	955.792	1120.69	-0.3873			442.7	0.26025	0.31646	0.31929		442.7	-3418.86	442.7	0.31929
		442.6	956.481	1121.34	-2.32498			442.6	0.26062	0.3169	0.31976		442.6	-3427.4	442.6	0.31976
		442.5	958.29	1124.58	2.1613			442.5	0.26116	0.31755	0.32043		442.5	-3435.41	442.5	0.32043
		442.4	960.111	1127.34	6.15332			442.4	0.26173	0.31818	0.32108		442.4	-3445.5	442.4	0.32108
		442.3	960.868	1128.32	6.047			442.3	0.2623	0.31891	0.32177		442.3	-3453.41	442.3	0.32177
		442.2	965.35	1131.81	6.9463			442.2	0.26286	0.31973	0.32237		442.2	-3459.96	442.2	0.32237
		442.1	968.143	1135.66	10.1471			442.1	0.2633	0.32055	0.32304		442.1	-3468.61	442.1	0.32304
		442	969.867	1138.4	11.6228			442	0.26361	0.32114	0.32352		442	-3474.96	442	0.32352
		441.9	973.853	1139.56	10.6121			441.9	0.26402	0.32192	0.3242		441.9	-3481.8	441.9	0.3242
		441.8	975.665	1143.99	11.0475			441.8	0.26445	0.32275	0.32477		441.8	-3489.02	441.8	0.32477
		441.7	979.101	1148.08	10.7659			441.7	0.26492	0.32365	0.32535		441.7	-3497.88	441.7	0.32535
		441.6	981.717	1154.1	11.6243			441.6	0.26545	0.32454	0.32599		441.6	-3504.12	441.6	0.32599
		441.5	985.229	1158.32	9.43133			441.5	0.26602	0.32533	0.32663		441.5	-3514.26	441.5	0.32663
		441.4	986.579	1162.83	7.01331			441.4	0.2667	0.3261	0.32723		441.4	-3528.43	441.4	0.32723
		441.3	990.047	1164.39	7.29687			441.3	0.26721	0.32671	0.32768		441.3	-3535.19	441.3	0.32768
		441.2	993.59	1166.73	8.70172			441.2	0.26797	0.32748	0.32831		441.2	-3543.41	441.2	0.32831
		441.1	996.226	1172.06	10.8925			441.1	0.26869	0.32822	0.32904		441.1	-3557.32	441.1	0.32904
		441	1000.96	1172.56	10.9486			441	0.26942	0.32894	0.32976		441	-3569.72	441	0.32976
		440.9	1003.87	1173.41	10.3689			440.9	0.26996	0.32974	0.33048		440.9	-3581.95	440.9	0.33048
		440.8	1006.57	1176.9	12.6796			440.8	0.27037	0.33032	0.33097		440.8	-3587.19	440.8	0.33097
		440.7	1010.45	1180.34	12.8988			440.7	0.27082	0.33102	0.33169		440.7	-3597.05	440.7	0.33169
		440.6	1011.14	1185.29	14.2335			440.6	0.27122	0.33177	0.33228		440.6	-3606.33	440.6	0.33228
		440.5	1013.11	1189.85	14.2886			440.5	0.27155	0.33251	0.33284		440.5	-3614.77	440.5	0.33284
		440.4	1011.73	1191.35	14.8179			440.4	0.27199	0.33326	0.33349		440.4	-3624.05	440.4	0.33349
		440.3	1012.15	1195.75	12.0235			440.3	0.27247	0.33398	0.33416		440.3	-3632.04	440.3	0.33416
		440.2	1013.77	1198.59	9.24596			440.2	0.27284	0.33453	0.33459		440.2	-3637.7	440.2	0.33459
		440.1	1015.86	1199.19	5.32826			440.1	0.27345	0.3352	0.33519		440.1	-3645.51	440.1	0.33519
		440	1016.56	1204.29	6.18208			440	0.27414	0.33594	0.33581		440	-3655.19	440	0.33581
		439.9	1019.01	1205.52	5.57792			439.9	0.27473	0.33669	0.33646		439.9	-3663.66	439.9	0.33646
		439.8	1021.43	1205.84	5.33487			439.8	0.27528	0.33741	0.33718		439.8	-3671.55	439.8	0.33718
		439.7	1024.74	1206.89	11.5383			439.7	0.27573	0.33797	0.33801		439.7	-3675.95	439.7	0.33801
		439.6	1025.62	1209.06	12.8381			439.6	0.27621	0.33838	0.3388		439.6	-3688.89	439.6	0.3388
		439.5	1027.28	1212.32	13.4993			439.5	0.27668	0.3387	0.33956		439.5	-3698.02	439.5	0.33956
		439.4	1029.98	1214.98	13.9588			439.4	0.27698	0.339	0.34015		439.4	-3705.21	439.4	0.34015
		439.3	1032.17	1214.95	13.3462			439.3	0.27752	0.33942	0.34093		439.3	-3713.9	439.3	0.34093
		439.2	1034.87	1218.57	12.0382			439.2	0.27793	0.33994	0.34173		439.2	-3722.52	439.2	0.34173
		439.1	1037.24	1219.05	10.1512			439.1	0.27836	0.34055	0.34257		439.1	-3729.9	439.1	0.34257
		439	1039.99	1219.85	7.73797			439	0.27875	0.34125	0.34329		439	-3738.95	439	0.34329
		438.9	1044.43	1224.28	4.16142			438.9	0.27916	0.342	0.344		438.9	-3746.75	438.9	0.344
		438.8	1046.25	1230.02	6.06871			438.8	0.27975	0.34275	0.34475		438.8	-3758.11	438.8	0.34475
		438.7	1048.81	1231.82	7.72349			438.7	0.28031	0.34347	0.34546		438.7	-3768.03	438.7	0.34546
		438.6	1051.5	1237.26	5.79086			438.6	0.28096	0.3442	0.3461		438.6	-3777.87	438.6	0.3461
		438.5	1052.33	1240.36	5.14615			438.5	0.28153	0.34501	0.3468		438.5	-3788.89	438.5	0.3468
		438.4	1054.06	1242.85	8.34811			438.4	0.28203	0.3457	0.34747		438.4	-3797.82	438.4	0.34747
		438.3	1057.77	1246.27	6.07607			438.3	0.28244	0.34627	0.34813		438.3	-3806.39	438.3	0.34813
		438.2	1059.45	1249.47	5.2422			438.2	0.28282	0.34661	0.3487		438.2	-3816.63	438.2	0.3487
		438.1	1060.41	1253.61	4.54732			438.1	0.28315	0.3469	0.34934		438.1	-3827.73	438.1	0.34934
		438	1062.25	1252.06	5.92777			438	0.28341	0.34713	0.35013		438	-3835.01	438	0.35013
		437.9	1062.99	1254.1	3.53269			437.9	0.28367	0.34738	0.35102		437.9	-3843.02	437.9	0.35102
		437.8	1064.83	1255.63	2.74853			437.8	0.28407	0.34777	0.35186		437.8	-3851.5	437.8	0.35186
		437.7	1069.3	1256.36	-0.13405			437.7	0.28449	0.34815	0.35272		437.7	-3858.22	437.7	0.35272
		437.6	1071.83	1263.26	1.46607			437.6	0.28493	0.34865	0.3534		437.6	-3863.09	437.6	0.3534
		437.5	1072.5	1265.5	3.93466			437.5	0.28551	0.3492	0.35393		437.5	-3868.48	437.5	0.35393
		437.4	1074.52	1269.25	1.13938			437.4	0.28603	0.34991	0.35439		437.4	-3877.91	437.4	0.35439
		437.3	1077.59	1271.55	1.58709			437.3	0.2866	0.35066	0.35483		437.3	-3886.17	437.3	0.35483
		437.2	1079.42	1275.63	1.69469			437.2	0.28726	0.35138	0.3554		437.2	-3893.84	437.2	0.3554
		437.1	1082.56	1277.79	3.49036			437.1	0.288	0.35204	0.35602		437.1	-3902.54	437.1	0.35602
		437	1087.83	1282.39	2.69338			437	0.28881	0.35283	0.35677		437	-3908.45	437	0.35677
		436.9	1088.3	1285.15	5.35296			436.9	0.28935	0.35331	0.35747		436.9	-3914.73	436.9	0.35747
		436.8	1090.4	1290.61	7.22781			436.8	0.28977	0.3539	0.35827		436.8	-3922.81	436.8	0.35827
		436.7	1093.08	1293.53	5.44375			436.7	0.29019	0.3544	0.35904		436.7	-3930.69	436.7	0.35904
		436.6	1094.63	1293.64	3.76362			436.6	0.29058	0.35488	0.35987		436.6	-3936.65	436.6	0.35987
		436.5	1098.27	1297.05	6.11631			436.5	0.29102	0.35523	0.36057		436.5	-3945.84	436.5	0.36057
		436.4	1101.34	1300.53	1.98705			436.4	0.29149	0.35574	0.36119		436.4	-3957.13	436.4	0.36119
		436.3	1104.25	1302.92	2.0922			436.3	0.29206	0.35641	0.36172		436.3	-3967.36	436.3	0.36172
		436.2	1107.23	1307.96	0.89784			436.2	0.2926	0.35727	0.36219		436.2	-3971.14	436.2	0.36219
		436.1	1110.28	1308.43	0.05818			436.1	0.29324	0.35817	0.36277		436.1	-3978.15	436.1	0.36277
		436	1111.6	1312.84	-2.88408			436	0.29382	0.35909	0.36329		436	-3982.72	436	0.36329
		435.9	1114.57	1312.07	-1.80527			435.9	0.29445	0.35984	0.36391		435.9	-3987.84	435.9	0.36391
		435.8	1115.02	1318.79	-2.03283			435.8	0.29501	0.36046	0.36448		435.8	-3996.86	435.8	0.36448
		435.7	1117.33	1319.01	0.72509			435.7	0.29562	0.36095	0.36517		435.7	-4004.14	435.7	0.36517
		435.6	1118.56	1319.44	0.99293			435.6	0.29617	0.36146	0.36597		435.6	-4017.93	435.6	0.36597
		435.5	1119.58	1320.94	-2.11988			435.5	0.29646	0.36184	0.36654		435.5	-4026.84	435.5	0.36654
		435.4	1120.26	1323.17	-7.1462			435.4	0.29672	0.36223	0.36706		435.4	-4034.94	435.4	0.36706
		435.3	1121.08	1320.78	-5.8076			435.3	0.297	0.36264	0.3676		435.3	-4043.72	435.3	0.3676
		435.2	1123.73	1323.12	-5.68386			435.2	0.29733	0.36296	0.36807		435.2	-4052.35	435.2	0.36807
		435.1	1124.76	1324.32	-5.75745			435.1	0.29783	0.36332	0.36865		435.1	-4059.94	435.1	0.36865
		435	1124.8	1325.66	-3.33626			435	0.29828	0.36389	0.36931		435	-4074.08	435	0.36931
		434.9	1127.57	1326.49	-2.53721			434.9	0.29883	0.36468	0.3701		434.9	-4082.43	434.9	0.3701
		434.8	1131.02	1328.19	-3.7047			434.8	0.29945	0.36566	0.37085		434.8	-4089.01	434.8	0.37085
		434.7	1133.02	1331.73	-1.40776			434.7	0.29999	0.36662	0.3715		434.7	-4096.24	434.7	0.3715
		434.6	1136.67	1335.52	0.13134			434.6	0.30058	0.36755	0.3722		434.6	-4102.11	434.6	0.3722
		434.5	1139.86	1336.79	-2.49329			434.5	0.30099	0.36827	0.37289		434.5	-4109.35	434.5	0.37289
		434.4	1140.1	1340.41	-3.0565			434.4	0.30144	0.36896	0.37369		434.4	-4112.35	434.4	0.37369
		434.3	1144.17	1340.34	-4.6367			434.3	0.30187	0.36957	0.37468		434.3	-4124.72	434.3	0.37468
		434.2	1148.2	1340.59	-2.76669			434.2	0.3023	0.37001	0.37571		434.2	-4131.29	434.2	0.37571
		434.1	1151.66	1344.83	-3.56736			434.1	0.3028	0.37038	0.37665		434.1	-4140.71	434.1	0.37665
		434	1151.63	1345.48	-6.04338			434	0.30323	0.37063	0.37739		434	-4148.15	434	0.37739
		433.9	1153.41	1344.78	-5.14533			433.9	0.3037	0.37101	0.37783		433.9	-4155.95	433.9	0.37783
		433.8	1155.62	1347.98	-4.74181			433.8	0.30409	0.37148	0.37821		433.8	-4166.08	433.8	0.37821
		433.7	1157.91	1351.14	-3.0878			433.7	0.30449	0.37205	0.37852		433.7	-4172.94	433.7	0.37852
		433.6	1160.82	1352.83	-7.11701			433.6	0.30488	0.37283	0.37883		433.6	-4183.19	433.6	0.37883
		433.5	1161.75	1352.78	-7.76022			433.5	0.30545	0.37363	0.37914		433.5	-4191.76	433.5	0.37914
		433.4	1163.96	1355.69	-7.66006			433.4	0.30596	0.37452	0.37944		433.4	-4199.13	433.4	0.37944
		433.3	1166.85	1362.1	-6.19661			433.3	0.30647	0.3755	0.37976		433.3	-4205.43	433.3	0.37976
		433.2	1167.91	1369.38	-7.76557			433.2	0.30695	0.37646	0.38021		433.2	-4211.51	433.2	0.38021
		433.1	1167.42	1371.36	-4.59432			433.1	0.30745	0.3772	0.38084		433.1	-4217.73	433.1	0.38084
		433	1169.27	1374.85	-4.48436			433	0.30786	0.37776	0.38163		433	-4223.18	433	0.38163
		432.9	1171.17	1378.13	-3.72465			432.9	0.30832	0.37817	0.38255		432.9	-4228.41	432.9	0.38255
		432.8	1171.48	1382.13	-7.90163			432.8	0.30874	0.3785	0.38334		432.8	-4233.9	432.8	0.38334
		432.7	1174.68	1381.49	-7.0365			432.7	0.30912	0.37883	0.38409		432.7	-4243.55	432.7	0.38409
		432.6	1175.45	1382.58	-8.7036			432.6	0.30948	0.3792	0.38464		432.6	-4246.85	432.6	0.38464
		432.5	1179.24	1384.51	-7.0775			432.5	0.30994	0.37973	0.3851		432.5	-4254.06	432.5	0.3851
		432.4	1180.88	1391.87	-7.07612			432.4	0.31036	0.38045	0.38543		432.4	-4258.63	432.4	0.38543
		432.3	1184.11	1397.79	-6.79516			432.3	0.31078	0.38129	0.38571		432.3	-4262.36	432.3	0.38571
		432.2	1185.78	1401.48	-6.24764			432.2	0.31113	0.38208	0.38613		432.2	-4268.95	432.2	0.38613
		432.1	1186.81	1406.2	-3.35669			432.1	0.31146	0.38292	0.38663		432.1	-4273.29	432.1	0.38663
		432	1187.52	1412.85	-3.23716			432	0.31179	0.38374	0.38719		432	-4279.18	432	0.38719
		431.9	1190.21	1416.14	-4.48192			431.9	0.31213	0.38459	0.38796		431.9	-4282.83	431.9	0.38796
		431.8	1190.9	1420.6	-8.51289			431.8	0.31246	0.38551	0.3887		431.8	-4287.75	431.8	0.3887
		431.7	1193	1423.54	-10.5075			431.7	0.31294	0.38632	0.38944		431.7	-4289.44	431.7	0.38944
		431.6	1194.79	1426.64	-11.7026			431.6	0.31345	0.38689	0.39012		431.6	-4295.46	431.6	0.39012
		431.5	1198.09	1431.94	-12.736			431.5	0.31398	0.3872	0.39073		431.5	-4300.84	431.5	0.39073
		431.4	1200.06	1434.13	-14.8326			431.4	0.31456	0.38743	0.39122		431.4	-4307.64	431.4	0.39122
		431.3	1200.83	1434.96	-17.7823			431.3	0.31507	0.38768	0.39163		431.3	-4316.98	431.3	0.39163
		431.2	1202.85	1436.96	-18.1825			431.2	0.31549	0.38809	0.39193		431.2	-4320.56	431.2	0.39193
		431.1	1202.14	1438.61	-18.9448			431.1	0.31578	0.38856	0.39205		431.1	-4327.98	431.1	0.39205
		431	1202.66	1441.56	-14.4713			431	0.31602	0.3892	0.39209		431	-4336.91	431	0.39209
		430.9	1202.37	1447.6	-11.8539			430.9	0.31621	0.39018	0.39236		430.9	-4344.85	430.9	0.39236
		430.8	1202.25	1449.17	-11.6099			430.8	0.31633	0.39105	0.39269		430.8	-4350.13	430.8	0.39269
		430.7	1206	1452.52	-11.711			430.7	0.31649	0.392	0.39333		430.7	-4357.56	430.7	0.39333
		430.6	1208.62	1459.17	-11.677			430.6	0.31666	0.39286	0.39414		430.6	-4363.03	430.6	0.39414
		430.5	1211.84	1462.87	-15.2481			430.5	0.317	0.39365	0.39496		430.5	-4368.25	430.5	0.39496
		430.4	1215.6	1465.88	-16.8589			430.4	0.3174	0.39435	0.39574		430.4	-4374.31	430.4	0.39574
		430.3	1218.76	1467.49	-15.5058			430.3	0.3179	0.39481	0.39664		430.3	-4376.13	430.3	0.39664
		430.2	1220.95	1468.56	-13.6288			430.2	0.31834	0.3951	0.39737		430.2	-4376.01	430.2	0.39737
		430.1	1221.18	1469.63	-9.37342			430.1	0.31877	0.39529	0.39807		430.1	-4378.99	430.1	0.39807
		430	1224.6	1470.66	-8.04691			430	0.31918	0.39541	0.39867		430	-4384.52	430	0.39867
		429.9	1227.63	1471.33	-7.48665			429.9	0.31963	0.3956	0.39916		429.9	-4391.25	429.9	0.39916
		429.8	1228.61	1475.68	-9.71897			429.8	0.31995	0.39608	0.39961		429.8	-4395.34	429.8	0.39961
		429.7	1229.44	1475.15	-9.58535			429.7	0.32024	0.39663	0.39991		429.7	-4403.85	429.7	0.39991
		429.6	1232.12	1474.82	-10.1547			429.6	0.32046	0.39724	0.40025		429.6	-4413.04	429.6	0.40025
		429.5	1234.33	1475.18	-6.83859			429.5	0.32055	0.39792	0.40056		429.5	-4420.77	429.5	0.40056
		429.4	1235.75	1480.4	-5.81311			429.4	0.32084	0.39865	0.40097		429.4	-4427.76	429.4	0.40097
		429.3	1238.57	1486.86	-4.28864			429.3	0.32124	0.39948	0.4015		429.3	-4435.69	429.3	0.4015
		429.2	1240.01	1489.29	-5.81539			429.2	0.32167	0.4003	0.40208		429.2	-4440.48	429.2	0.40208
		429.1	1244.25	1491.02	-5.80947			429.1	0.32207	0.401	0.40269		429.1	-4441.04	429.1	0.40269
		429	1246.16	1493.04	-4.56154			429	0.32244	0.40156	0.40345		429	-4441.08	429	0.40345
		428.9	1248.43	1494.15	-6.17775			428.9	0.32287	0.40198	0.40416		428.9	-4438.29	428.9	0.40416
		428.8	1249.89	1491.95	-4.12205			428.8	0.32338	0.40243	0.40497		428.8	-4443.75	428.8	0.40497
		428.7	1251.22	1492.56	-3.46932			428.7	0.32379	0.40278	0.40548		428.7	-4443.37	428.7	0.40548
		428.6	1253.23	1498.51	0.21733			428.6	0.3242	0.40305	0.40587		428.6	-4447.02	428.6	0.40587
		428.5	1256.21	1497.62	4.85573			428.5	0.32447	0.40324	0.40631		428.5	-4453.2	428.5	0.40631
		428.4	1259.51	1498.93	4.50864			428.4	0.3247	0.40342	0.4067		428.4	-4458.86	428.4	0.4067
		428.3	1258.68	1499.64	7.11384			428.3	0.3249	0.40386	0.40694		428.3	-4462.39	428.3	0.40694
		428.2	1259.27	1503.13	8.65747			428.2	0.32506	0.40452	0.40726		428.2	-4467.11	428.2	0.40726
		428.1	1261.37	1505.93	9.41347			428.1	0.32527	0.4054	0.40765		428.1	-4470.06	428.1	0.40765
		428	1264.06	1511.7	13.6028			428	0.32557	0.40623	0.40821		428	-4474.58	428	0.40821
		427.9	1263.54	1516.7	16.9494			427.9	0.326	0.40707	0.40881		427.9	-4479.57	427.9	0.40881
		427.8	1267.96	1517.41	19.2746			427.8	0.32651	0.40772	0.40954		427.8	-4483.73	427.8	0.40954
		427.7	1271.39	1519.27	18.2355			427.7	0.32708	0.40829	0.41028		427.7	-4484.59	427.7	0.41028
		427.6	1274.14	1522.41	12.6736			427.6	0.32788	0.40885	0.41097		427.6	-4489.14	427.6	0.41097
		427.5	1275.61	1524.64	10.8996			427.5	0.32848	0.40912	0.41151		427.5	-4490.72	427.5	0.41151
		427.4	1277.5	1527.86	7.93195			427.4	0.32901	0.4094	0.41194		427.4	-4493.13	427.4	0.41194
		427.3	1279.39	1527.59	7.31012			427.3	0.32948	0.40971	0.41237		427.3	-4497.46	427.3	0.41237
		427.2	1280.06	1529.11	7.42771			427.2	0.32989	0.40992	0.41291		427.2	-4499.15	427.2	0.41291
		427.1	1280.73	1533.13	10.3307			427.1	0.33025	0.41041	0.41331		427.1	-4505.86	427.1	0.41331
		427	1281.1	1536.14	9.45447			427	0.33051	0.411	0.41374		427	-4513.86	427	0.41374
		426.9	1283.8	1537.66	7.66049			426.9	0.33077	0.41172	0.41431		426.9	-4521.02	426.9	0.41431
		426.8	1287.81	1541.07	6.3662			426.8	0.33109	0.41246	0.41494		426.8	-4522.12	426.8	0.41494
		426.7	1287.58	1543.97	4.31835			426.7	0.33137	0.41324	0.41556		426.7	-4525.38	426.7	0.41556
		426.6	1289.68	1546.19	0.79617			426.6	0.33154	0.41388	0.41616		426.6	-4524.46	426.6	0.41616
		426.5	1291.75	1548.97	2.30695			426.5	0.33186	0.41451	0.41694		426.5	-4525.02	426.5	0.41694
		426.4	1294.13	1554	1.3702			426.4	0.33216	0.41489	0.41741		426.4	-4526.81	426.4	0.41741
		426.3	1295.9	1554.57	-1.56759			426.3	0.33253	0.41498	0.4177		426.3	-4530.33	426.3	0.4177
		426.2	1299.19	1556.35	-4.30016			426.2	0.33301	0.41509	0.41808		426.2	-4531.86	426.2	0.41808
		426.1	1299.6	1556.4	-4.29967			426.1	0.33335	0.41512	0.41844		426.1	-4535.27	426.1	0.41844
		426	1300.83	1560.72	-1.98919			426	0.33378	0.41523	0.41899		426	-4539.87	426	0.41899
		425.9	1300.72	1560.81	-2.2041			425.9	0.33406	0.41547	0.41969		425.9	-4544.01	425.9	0.41969
		425.8	1302.1	1562.09	-3.23653			425.8	0.3344	0.41575	0.42034		425.8	-4552.26	425.8	0.42034
		425.7	1302.2	1564.46	-1.25242			425.7	0.33475	0.41632	0.42089		425.7	-4558.07	425.7	0.42089
		425.6	1303.79	1567.33	-2.95256			425.6	0.33508	0.41713	0.42134		425.6	-4565.95	425.6	0.42134
		425.5	1306.87	1571.36	-4.51088			425.5	0.33549	0.41809	0.4218		425.5	-4569.28	425.5	0.4218
		425.4	1310.09	1574.81	-9.65507			425.4	0.33585	0.41884	0.42227		425.4	-4575.14	425.4	0.42227
		425.3	1311.74	1576.37	-11.6582			425.3	0.33617	0.41965	0.42277		425.3	-4581.45	425.3	0.42277
		425.2	1311.32	1582.13	-15.6876			425.2	0.33664	0.42054	0.42325		425.2	-4581.86	425.2	0.42325
		425.1	1314.33	1586.54	-13.4868			425.1	0.33701	0.42111	0.42367		425.1	-4587.46	425.1	0.42367
		425	1320.49	1589.83	-17.1663			425	0.33741	0.42146	0.42421		425	-4590.13	425	0.42421
		424.9	1322.54	1591.76	-17.9259			424.9	0.33773	0.42167	0.42478		424.9	-4595.59	424.9	0.42478
		424.8	1323.77	1593.26	-18.9605			424.8	0.33804	0.42178	0.42521		424.8	-4601.26	424.8	0.42521
		424.7	1324.19	1594.51	-19.8524			424.7	0.33828	0.42199	0.42564		424.7	-4605.1	424.7	0.42564
		424.6	1328.57	1598.29	-23.9373			424.6	0.33858	0.4222	0.42614		424.6	-4608.8	424.6	0.42614
		424.5	1329.72	1601.27	-18.915			424.5	0.33889	0.42248	0.42677		424.5	-4612.09	424.5	0.42677
		424.4	1330.51	1604.83	-20.218			424.4	0.33916	0.4228	0.4275		424.4	-4614.56	424.4	0.4275
		424.3	1331.19	1605.82	-18.8155			424.3	0.33945	0.42319	0.42812		424.3	-4619.92	424.3	0.42812
		424.2	1334.97	1606.2	-15.7761			424.2	0.33971	0.42365	0.42875		424.2	-4623.41	424.2	0.42875
		424.1	1335.85	1606.95	-17.0521			424.1	0.33995	0.42413	0.42935		424.1	-4626.35	424.1	0.42935
		424	1334.7	1605.67	-17.7019			424	0.33999	0.4245	0.4298		424	-4628.77	424	0.4298
		423.9	1335.77	1610.66	-16.7559			423.9	0.34005	0.42498	0.43023		423.9	-4632.37	423.9	0.43023
		423.8	1337.91	1610.8	-16.2427			423.8	0.3402	0.42539	0.43068		423.8	-4636.33	423.8	0.43068
		423.7	1338.01	1612.22	-17.6432			423.7	0.34036	0.4258	0.43105		423.7	-4635.08	423.7	0.43105
		423.6	1338.75	1617.77	-16.9064			423.6	0.3406	0.42621	0.43135		423.6	-4639.71	423.6	0.43135
		423.5	1338.72	1616.27	-18.6187			423.5	0.34089	0.42649	0.43156		423.5	-4645.71	423.5	0.43156
		423.4	1340.13	1619.01	-16.2098			423.4	0.34127	0.42677	0.43199		423.4	-4647.42	423.4	0.43199
		423.3	1341.76	1620.89	-12.2473			423.3	0.3417	0.42701	0.43235		423.3	-4651.17	423.3	0.43235
		423.2	1344.54	1624	-9.7368			423.2	0.34221	0.42739	0.433		423.2	-4652.47	423.2	0.433
		423.1	1344.71	1625.16	-7.942			423.1	0.34265	0.42795	0.4336		423.1	-4653.02	423.1	0.4336
		423	1348.14	1631.67	-8.03953			423	0.34294	0.42871	0.43433		423	-4649.1	423	0.43433
		422.9	1350.1	1633.49	-5.48661			422.9	0.3432	0.42955	0.43502		422.9	-4653.12	422.9	0.43502
		422.8	1351.78	1637.03	-8.13971			422.8	0.34337	0.43021	0.43546		422.8	-4656.46	422.8	0.43546
		422.7	1352.89	1640.02	-9.90095			422.7	0.34354	0.43065	0.43566		422.7	-4660.82	422.7	0.43566
		422.6	1356.01	1641.64	-11.8712			422.6	0.34385	0.43092	0.43577		422.6	-4663.3	422.6	0.43577
		422.5	1358.08	1645.45	-8.84017			422.5	0.34421	0.43102	0.43594		422.5	-4666.2	422.5	0.43594
		422.4	1360.61	1647.37	-10.3743			422.4	0.34457	0.43096	0.43624		422.4	-4669.75	422.4	0.43624
		422.3	1363.47	1649.78	-8.2375			422.3	0.34496	0.43064	0.43653		422.3	-4671.1	422.3	0.43653
		422.2	1366.77	1654.6	-5.38236			422.2	0.34523	0.43036	0.43699		422.2	-4673.52	422.2	0.43699
		422.1	1368.26	1654.77	-5.42793			422.1	0.34561	0.43022	0.43721		422.1	-4673.54	422.1	0.43721
		422	1371.31	1653.09	-4.9328			422	0.34594	0.43031	0.4376		422	-4672.25	422	0.4376
		421.9	1372.72	1656.16	-4.18945			421.9	0.34619	0.43046	0.43792		421.9	-4676.49	421.9	0.43792
		421.8	1373.27	1661.55	-3.28734			421.8	0.34645	0.43092	0.43834		421.8	-4677.88	421.8	0.43834
		421.7	1372.37	1662.91	-1.47773			421.7	0.34667	0.43149	0.43882		421.7	-4677.74	421.7	0.43882
		421.6	1374.12	1669.55	-0.42296			421.6	0.3469	0.43205	0.43924		421.6	-4673.88	421.6	0.43924
		421.5	1375.28	1669.51	-0.40485			421.5	0.34712	0.43257	0.43975		421.5	-4674.06	421.5	0.43975
		421.4	1377.77	1669.1	-1.29643			421.4	0.34735	0.433	0.44026		421.4	-4674.29	421.4	0.44026
		421.3	1376.52	1668.28	-2.18123			421.3	0.34757	0.43329	0.4407		421.3	-4679.32	421.3	0.4407
		421.2	1378.15	1671.14	1.18494			421.2	0.34763	0.43349	0.44091		421.2	-4680.38	421.2	0.44091
		421.1	1378.46	1673.62	-0.56982			421.1	0.34762	0.43367	0.44087		421.1	-4686.55	421.1	0.44087
		421	1378.9	1673.15	-0.11125			421	0.34758	0.4339	0.44075		421	-4690.28	421	0.44075
		420.9	1379.55	1674.09	1.70505			420.9	0.34759	0.43426	0.44072		420.9	-4692.72	420.9	0.44072
		420.8	1381.66	1676.7	3.06714			420.8	0.34774	0.43457	0.44065		420.8	-4693.78	420.8	0.44065
		420.7	1381.93	1679.94	5.72643			420.7	0.34799	0.43508	0.44085		420.7	-4696.52	420.7	0.44085
		420.6	1383.53	1676	5.5884			420.6	0.34833	0.43541	0.44108		420.6	-4695.87	420.6	0.44108
		420.5	1384.68	1678.51	8.30484			420.5	0.34851	0.43566	0.44135		420.5	-4694.95	420.5	0.44135
		420.4	1386.45	1680.5	10.602			420.4	0.34879	0.43586	0.44178		420.4	-4696.69	420.4	0.44178
		420.3	1390.72	1683.49	10.6475			420.3	0.34903	0.43612	0.44219		420.3	-4698.13	420.3	0.44219
		420.2	1392.19	1681.03	14.172			420.2	0.34924	0.43631	0.44271		420.2	-4698	420.2	0.44271
		420.1	1393.85	1684.51	15.2833			420.1	0.34928	0.43657	0.44325		420.1	-4698.05	420.1	0.44325
		420	1393.64	1684.02	9.31158			420	0.34937	0.43677	0.44368		420	-4700.81	420	0.44368
		419.9	1393.82	1683.44	6.68372			419.9	0.34932	0.43699	0.44409		419.9	-4703.12	419.9	0.44409
		419.8	1397.02	1683.66	6.1563			419.8	0.34935	0.43715	0.44424		419.8	-4706.53	419.8	0.44424
		419.7	1398.06	1685.62	7.8084			419.7	0.34934	0.4373	0.44451		419.7	-4711.31	419.7	0.44451
		419.6	1396.71	1687.57	10.1441			419.6	0.34947	0.43732	0.44462		419.6	-4715.35	419.6	0.44462
		419.5	1396.67	1690.25	6.41912			419.5	0.34963	0.43741	0.44478		419.5	-4713.67	419.5	0.44478
		419.4	1396.3	1690.74	4.75179			419.4	0.34985	0.43752	0.44507		419.4	-4713.7	419.4	0.44507
		419.3	1398.36	1690.69	4.73711			419.3	0.35	0.43786	0.44548		419.3	-4713.4	419.3	0.44548
		419.2	1398.14	1694.78	6.69791			419.2	0.35	0.43822	0.44568		419.2	-4706.91	419.2	0.44568
		419.1	1399.4	1694.45	4.32835			419.1	0.35002	0.43869	0.44586		419.1	-4708.25	419.1	0.44586
		419	1399.28	1694.78	2.76911			419	0.35009	0.43922	0.44598		419	-4712.85	419	0.44598
		418.9	1395.68	1693.77	-2.68279			418.9	0.35016	0.4397	0.44619		418.9	-4714.99	418.9	0.44619
		418.8	1395.78	1692.82	-1.11672			418.8	0.35024	0.44012	0.44648		418.8	-4715.66	418.8	0.44648
		418.7	1397.47	1693.85	-0.85558			418.7	0.3503	0.44026	0.44687		418.7	-4718.24	418.7	0.44687
		418.6	1395.16	1697.81	-0.66075			418.6	0.35037	0.44042	0.44725		418.6	-4721.75	418.6	0.44725
		418.5	1397.45	1697.8	-2.10729			418.5	0.35025	0.44058	0.44764		418.5	-4721.58	418.5	0.44764
		418.4	1398.59	1696.75	-2.63318			418.4	0.35019	0.4406	0.44796		418.4	-4721.98	418.4	0.44796
		418.3	1397.11	1698.65	-2.55035			418.3	0.35014	0.4406	0.44819		418.3	-4723.11	418.3	0.44819
		418.2	1395.95	1696.9	-4.07854			418.2	0.35008	0.44058	0.44828		418.2	-4721.2	418.2	0.44828
		418.1	1394.71	1699.81	-5.28751			418.1	0.35005	0.44052	0.4482		418.1	-4717.47	418.1	0.4482
		418	1393.64	1700.77	-5.04395			418	0.34991	0.4406	0.44805		418	-4710.47	418	0.44805
		417.9	1394.43	1701.41	-6.69016			417.9	0.34984	0.44075	0.44802		417.9	-4710.08	417.9	0.44802
		417.8	1396.67	1702.18	-6.30169			417.8	0.34981	0.44109	0.44813		417.8	-4708.83	417.8	0.44813
		417.7	1397.9	1706.62	-8.60868			417.7	0.34994	0.44145	0.44828		417.7	-4708.38	417.7	0.44828
		417.6	1401.41	1708.54	-4.42792			417.6	0.3501	0.44176	0.44872		417.6	-4703.7	417.6	0.44872
		417.5	1403.08	1711.13	-7.11148			417.5	0.35032	0.4419	0.44902		417.5	-4699.55	417.5	0.44902
		417.4	1403.62	1711.32	-8.42698			417.4	0.35055	0.4421	0.44942		417.4	-4704.31	417.4	0.44942
		417.3	1405.8	1712.49	-12.3204			417.3	0.35073	0.44211	0.44969		417.3	-4705.61	417.3	0.44969
		417.2	1406.2	1717.34	-12.0144			417.2	0.35083	0.44214	0.44993		417.2	-4703.22	417.2	0.44993
		417.1	1406.95	1716.69	-13.1976			417.1	0.35091	0.44205	0.44999		417.1	-4705.91	417.1	0.44999
		417	1405.15	1716.12	-11.9443			417	0.35096	0.44194	0.44994		417	-4704.73	417	0.44994
		416.9	1404.09	1719.55	-10.7755			416.9	0.3509	0.44185	0.44994		416.9	-4705.04	416.9	0.44994
		416.8	1404.48	1719.74	-14.351			416.8	0.3509	0.44184	0.44988		416.8	-4707.32	416.8	0.44988
		416.7	1403.41	1718.77	-11.6593			416.7	0.35099	0.44178	0.44957		416.7	-4703.69	416.7	0.44957
		416.6	1405.05	1721.42	-11.5918			416.6	0.35097	0.44183	0.44934		416.6	-4702.72	416.6	0.44934
		416.5	1404.9	1721.19	-12.7968			416.5	0.35101	0.4419	0.44921		416.5	-4700.39	416.5	0.44921
		416.4	1403.34	1718.71	-13.0414			416.4	0.35105	0.44206	0.44918		416.4	-4700.04	416.4	0.44918
		416.3	1405.15	1716.36	-9.60993			416.3	0.35115	0.44216	0.44918		416.3	-4697.84	416.3	0.44918
		416.2	1405.74	1713.97	-7.14959			416.2	0.35123	0.44227	0.44927		416.2	-4697.18	416.2	0.44927
		416.1	1407.74	1713.54	-6.90204			416.1	0.35132	0.4424	0.4493		416.1	-4697.13	416.1	0.4493
		416	1408.62	1712.72	-7.80579			416	0.35134	0.4424	0.44948		416	-4696.1	416	0.44948
		415.9	1408.04	1711.88	-5.19637			415.9	0.35135	0.44254	0.44958		415.9	-4697.5	415.9	0.44958
		415.8	1408.35	1709.58	-8.04064			415.8	0.35131	0.44249	0.44971		415.8	-4697.95	415.8	0.44971
		415.7	1406.14	1712.17	-7.3199			415.7	0.3511	0.44244	0.44986		415.7	-4694.82	415.7	0.44986
		415.6	1408.26	1714.92	-2.46054			415.6	0.35089	0.44217	0.45003		415.6	-4688.08	415.6	0.45003
		415.5	1409.17	1711.45	-2.84509			415.5	0.35067	0.44184	0.45001		415.5	-4685.7	415.5	0.45001
		415.4	1406.02	1711.6	-3.905			415.4	0.35045	0.44144	0.44965		415.4	-4679.01	415.4	0.44965
		415.3	1406.27	1710.13	-3.18111			415.3	0.35032	0.44101	0.44945		415.3	-4671.14	415.3	0.44945
		415.2	1405.88	1709.42	-2.97879			415.2	0.35042	0.44056	0.44919		415.2	-4668.55	415.2	0.44919
		415.1	1407.64	1707.73	-4.14212			415.1	0.35063	0.44015	0.44889		415.1	-4662.14	415.1	0.44889
		415	1408.23	1702.8	0.05579			415	0.35084	0.43988	0.44877		415	-4658.4	415	0.44877
		414.9	1409.02	1698.14	1.4434			414.9	0.35109	0.43974	0.44865		414.9	-4656.72	414.9	0.44865
		414.8	1411.17	1694.95	5.58706			414.8	0.35118	0.43978	0.44859		414.8	-4655.05	414.8	0.44859
		414.7	1412.11	1696.76	8.16444			414.7	0.35129	0.43977	0.44859		414.7	-4659.45	414.7	0.44859
		414.6	1411.81	1697.76	8.39341			414.6	0.35131	0.43982	0.44863		414.6	-4657.07	414.6	0.44863
		414.5	1408.76	1701.17	8.61408			414.5	0.35128	0.43986	0.44857		414.5	-4656.81	414.5	0.44857
		414.4	1409.22	1695.96	9.65178			414.4	0.35119	0.43977	0.4485		414.4	-4652.99	414.4	0.4485
		414.3	1405.96	1695.87	12.6368			414.3	0.35097	0.43956	0.44828		414.3	-4649.63	414.3	0.44828
		414.2	1405.39	1691.67	10.8698			414.2	0.3507	0.43936	0.44826		414.2	-4646.49	414.2	0.44826
		414.1	1404.22	1691.86	12.7507			414.1	0.35043	0.43894	0.44818		414.1	-4636.81	414.1	0.44818
		414	1402.6	1689.17	13.3799			414	0.35022	0.43865	0.44806		414	-4631.21	414	0.44806
		413.9	1403.6	1687.11	12.9056			413.9	0.35012	0.43822	0.44781		413.9	-4625.1	413.9	0.44781
		413.8	1404.76	1691.53	13.7671			413.8	0.35009	0.43777	0.4476		413.8	-4617.82	413.8	0.4476
		413.7	1403.41	1688.32	11.2498			413.7	0.35006	0.4375	0.44749		413.7	-4609.76	413.7	0.44749
		413.6	1404.61	1686	11.7019			413.6	0.35014	0.43719	0.44739		413.6	-4605.46	413.6	0.44739
		413.5	1406.11	1685.29	5.49973			413.5	0.35016	0.43694	0.44721		413.5	-4600.46	413.5	0.44721
		413.4	1403.34	1683.72	5.40826			413.4	0.35011	0.43677	0.4471		413.4	-4597.1	413.4	0.4471
		413.3	1403.37	1684.42	1.60392			413.3	0.35	0.43668	0.44704		413.3	-4594.07	413.3	0.44704
		413.2	1402.09	1683.93	-0.62087			413.2	0.34987	0.43661	0.44697		413.2	-4589.39	413.2	0.44697
		413.1	1400.53	1685.18	-3.65831			413.1	0.34977	0.43661	0.4468		413.1	-4585	413.1	0.4468
		413	1398.05	1686	-9.89851			413	0.34967	0.43652	0.44673		413	-4581.86	413	0.44673
		412.9	1399.12	1687.5	-12.1069			412.9	0.34943	0.43636	0.4466		412.9	-4573.4	412.9	0.4466
		412.8	1398.48	1686.91	-13.3801			412.8	0.34914	0.43614	0.44641		412.8	-4568.85	412.8	0.44641
		412.7	1397.1	1688.55	-15.2691			412.7	0.3489	0.43572	0.44626		412.7	-4561.21	412.7	0.44626
		412.6	1396.11	1688.06	-8.97401			412.6	0.34871	0.43536	0.44614		412.6	-4556.15	412.6	0.44614
		412.5	1393.08	1686.16	-12.4031			412.5	0.34852	0.43485	0.44583		412.5	-4550.57	412.5	0.44583
		412.4	1394.8	1686.9	-16.4832			412.4	0.34854	0.4342	0.44556		412.4	-4539.27	412.4	0.44556
		412.3	1394.41	1684.59	-16.4276			412.3	0.34852	0.43365	0.44511		412.3	-4526.81	412.3	0.44511
		412.2	1395.38	1682.35	-17.4909			412.2	0.34849	0.4332	0.4447		412.2	-4519.38	412.2	0.4447
		412.1	1393.57	1681.18	-22.1982			412.1	0.34851	0.43297	0.44427		412.1	-4512.12	412.1	0.44427
		412	1392.9	1678.49	-18.9843			412	0.34837	0.43289	0.444		412	-4509.53	412	0.444
		411.9	1392.96	1675.6	-16.3745			411.9	0.34815	0.43286	0.44363		411.9	-4512.05	411.9	0.44363
		411.8	1391.12	1677.69	-18.0292			411.8	0.34777	0.43276	0.44337		411.8	-4512.03	411.8	0.44337
		411.7	1385.89	1676.73	-17.4049			411.7	0.34735	0.43264	0.44317		411.7	-4510.62	411.7	0.44317
		411.6	1383.79	1677.79	-20.0827			411.6	0.34686	0.43251	0.44308		411.6	-4506.85	411.6	0.44308
		411.5	1385.4	1680.58	-22.5823			411.5	0.34643	0.43221	0.44289		411.5	-4505.68	411.5	0.44289
		411.4	1381.86	1676.91	-26.8734			411.4	0.34602	0.43168	0.44279		411.4	-4501.84	411.4	0.44279
		411.3	1381.12	1674.92	-26.8988			411.3	0.34578	0.43104	0.44254		411.3	-4496.07	411.3	0.44254
		411.2	1380.11	1671.98	-27.455			411.2	0.34559	0.43034	0.44215		411.2	-4486.44	411.2	0.44215
		411.1	1379.88	1665.72	-29.7206			411.1	0.34538	0.42965	0.44182		411.1	-4474.94	411.1	0.44182
		411	1376.62	1665.07	-31.1299			411	0.34524	0.42902	0.44144		411	-4469.59	411	0.44144
		410.9	1376.61	1661.55	-32.3648			410.9	0.34501	0.42846	0.44121		410.9	-4460.78	410.9	0.44121
		410.8	1372.97	1661.13	-28.4937			410.8	0.34484	0.42786	0.44078		410.8	-4451.39	410.8	0.44078
		410.7	1370.61	1660.18	-28.9247			410.7	0.34451	0.42752	0.44044		410.7	-4448.42	410.7	0.44044
		410.6	1367.46	1659.25	-27.1225			410.6	0.34417	0.42718	0.44003		410.6	-4445.07	410.6	0.44003
		410.5	1363.5	1657.4	-25.6217			410.5	0.34364	0.42698	0.43968		410.5	-4438.21	410.5	0.43968
		410.4	1359.1	1652.31	-25.969			410.4	0.3432	0.42681	0.43937		410.4	-4433.09	410.4	0.43937
		410.3	1359.41	1653.76	-24.3965			410.3	0.34271	0.42656	0.439		410.3	-4425.66	410.3	0.439
		410.2	1358.17	1652.73	-27.1009			410.2	0.3422	0.42627	0.43855		410.2	-4417.75	410.2	0.43855
		410.1	1356.44	1652.6	-24.1213			410.1	0.34175	0.42585	0.43798		410.1	-4410.9	410.1	0.43798
		410	1355.29	1653.19	-22.3137			410	0.34141	0.42542	0.43734		410	-4400.13	410	0.43734
		409.9	1355.54	1650.43	-15.6739			409.9	0.34114	0.4249	0.43664		409.9	-4384.72	409.9	0.43664
		409.8	1357.92	1646.73	-15.3284			409.8	0.34085	0.42429	0.436		409.8	-4377.55	409.8	0.436
		409.7	1355.72	1641.14	-9.98648			409.7	0.34066	0.42352	0.43528		409.7	-4365.4	409.7	0.43528
		409.6	1353.88	1637.61	-7.27636			409.6	0.34039	0.42266	0.43472		409.6	-4353.42	409.6	0.43472
		409.5	1350.99	1634.58	-7.24024			409.5	0.34014	0.42181	0.43416		409.5	-4342.36	409.5	0.43416
		409.4	1349.89	1630.95	-6.8403			409.4	0.33984	0.42101	0.43357		409.4	-4332.08	409.4	0.43357
		409.3	1348.72	1627.76	-7.07806			409.3	0.33945	0.42042	0.43307		409.3	-4321.87	409.3	0.43307
		409.2	1347.57	1628.13	-2.4022			409.2	0.339	0.41985	0.43263		409.2	-4313.01	409.2	0.43263
		409.1	1341.93	1622.53	0.91031			409.1	0.33825	0.4196	0.43224		409.1	-4305.66	409.1	0.43224
		409	1340.6	1621.61	7.00386			409	0.33747	0.41935	0.43171		409	-4298.78	409	0.43171
		408.9	1335.6	1619.48	7.05868			408.9	0.33677	0.41906	0.43123		408.9	-4290.86	408.9	0.43123
		408.8	1334.2	1620.08	11.1812			408.8	0.33618	0.41876	0.43049		408.8	-4283.22	408.8	0.43049
		408.7	1330.65	1622.05	13.0906			408.7	0.33576	0.41845	0.42979		408.7	-4273.16	408.7	0.42979
		408.6	1331.27	1620.95	11.5972			408.6	0.33559	0.41808	0.42923		408.6	-4259.25	408.6	0.42923
		408.5	1328.49	1618.84	13.7658			408.5	0.33539	0.4177	0.42873		408.5	-4246.04	408.5	0.42873
		408.4	1328.78	1613.47	14.1388			408.4	0.33514	0.41723	0.42825		408.4	-4230.32	408.4	0.42825
		408.3	1328.94	1610.17	14.0401			408.3	0.33481	0.4166	0.42756		408.3	-4218.16	408.3	0.42756
		408.2	1327.39	1607.1	15.0141			408.2	0.33444	0.4159	0.42692		408.2	-4205.41	408.2	0.42692
		408.1	1325.61	1608.32	21.4144			408.1	0.33404	0.41528	0.4262		408.1	-4192.18	408.1	0.4262
		408	1324.24	1604.32	25.2487			408	0.33356	0.41483	0.42546		408	-4176.25	408	0.42546
		407.9	1322.66	1604.39	23.6763			407.9	0.33305	0.41425	0.42476		407.9	-4164.76	407.9	0.42476
		407.8	1320.88	1603.31	24.17			407.8	0.33249	0.41362	0.424		407.8	-4153.37	407.8	0.424
		407.7	1319.59	1601.21	23.7852			407.7	0.33192	0.41285	0.42332		407.7	-4138.61	407.7	0.42332
		407.6	1315.3	1597.89	24.795			407.6	0.33131	0.4121	0.42258		407.6	-4124.79	407.6	0.42258
		407.5	1315.11	1593.14	22.0825			407.5	0.33077	0.41137	0.42191		407.5	-4113.3	407.5	0.42191
		407.4	1313.94	1589.34	20.0917			407.4	0.33032	0.41069	0.42126		407.4	-4098.96	407.4	0.42126
		407.3	1310.76	1587.78	20.7604			407.3	0.32999	0.41019	0.42074		407.3	-4087.46	407.3	0.42074
		407.2	1310.27	1582.88	16.8301			407.2	0.32953	0.40959	0.42017		407.2	-4071.39	407.2	0.42017
		407.1	1309.21	1581.41	13.1437			407.1	0.32906	0.409	0.41951		407.1	-4057.23	407.1	0.41951
		407	1306.09	1579.43	11.5722			407	0.3285	0.40847	0.41883		407	-4042.69	407	0.41883
		406.9	1301.97	1573.98	15.0005			406.9	0.32801	0.40781	0.41832		406.9	-4028.11	406.9	0.41832
		406.8	1295.95	1570.88	15.2693			406.8	0.32752	0.40713	0.41783		406.8	-4013.41	406.8	0.41783
		406.7	1295.06	1564.95	14.8833			406.7	0.32697	0.40653	0.41735		406.7	-3999.55	406.7	0.41735
		406.6	1293	1564.24	13.6142			406.6	0.32639	0.40573	0.41681		406.6	-3991.25	406.6	0.41681
		406.5	1287.14	1562.25	16.219			406.5	0.32572	0.40495	0.41624		406.5	-3978.96	406.5	0.41624
		406.4	1283.8	1560.04	18.5293			406.4	0.325	0.40424	0.41567		406.4	-3967.94	406.4	0.41567
		406.3	1281.67	1559.53	15.6851			406.3	0.32415	0.40361	0.41507		406.3	-3957.87	406.3	0.41507
		406.2	1279.3	1556.29	14.9758			406.2	0.32334	0.40302	0.41443		406.2	-3945.91	406.2	0.41443
		406.1	1274.77	1553.49	15.1697			406.1	0.32254	0.40247	0.41377		406.1	-3931.49	406.1	0.41377
		406	1272.08	1550.83	12.6667			406	0.32192	0.40193	0.41292		406	-3918.9	406	0.41292
		405.9	1268.1	1549.59	14.5427			405.9	0.32134	0.40135	0.41195		405.9	-3907.29	405.9	0.41195
		405.8	1265.3	1544.57	14.9153			405.8	0.32095	0.40067	0.41103		405.8	-3890.03	405.8	0.41103
		405.7	1264.28	1541.71	12.5094			405.7	0.32064	0.39996	0.41019		405.7	-3876.85	405.7	0.41019
		405.6	1262.59	1536.53	11.5042			405.6	0.32029	0.39919	0.40949		405.6	-3862.43	405.6	0.40949
		405.5	1260.76	1532.6	12.0737			405.5	0.31993	0.39841	0.40886		405.5	-3848.7	405.5	0.40886
		405.4	1260	1525.38	11.4668			405.4	0.31937	0.39759	0.40843		405.4	-3834.22	405.4	0.40843
		405.3	1256.47	1521	7.62272			405.3	0.31863	0.39673	0.40791		405.3	-3819.52	405.3	0.40791
		405.2	1254.7	1519.03	8.56333			405.2	0.31777	0.39577	0.40725		405.2	-3804.25	405.2	0.40725
		405.1	1250.65	1517.51	8.53839			405.1	0.31689	0.3947	0.40653		405.1	-3785.22	405.1	0.40653
		405	1245.24	1516.95	9.19237			405	0.31605	0.39373	0.40582		405	-3767.86	405	0.40582
		404.9	1238.4	1513.8	10.3953			404.9	0.31507	0.39263	0.40489		404.9	-3748.56	404.9	0.40489
		404.8	1235.88	1508.19	3.98704			404.8	0.31439	0.39171	0.40411		404.8	-3732.57	404.8	0.40411
		404.7	1234.23	1501.57	-1.95426			404.7	0.31379	0.39071	0.40327		404.7	-3719.07	404.7	0.40327
		404.6	1232.19	1497.1	0.53103			404.6	0.31319	0.38983	0.40237		404.6	-3705.4	404.6	0.40237
		404.5	1228.8	1493.96	-2.70716			404.5	0.31272	0.38902	0.40153		404.5	-3691.87	404.5	0.40153
		404.4	1225.59	1492.65	-0.47934			404.4	0.31209	0.38824	0.40067		404.4	-3677.09	404.4	0.40067
		404.3	1222.58	1489.51	1.50026			404.3	0.31146	0.38751	0.39982		404.3	-3661.32	404.3	0.39982
		404.2	1217.71	1486.09	1.5665			404.2	0.31076	0.38675	0.39902		404.2	-3644.8	404.2	0.39902
		404.1	1215.26	1481.95	1.07465			404.1	0.31008	0.38581	0.3981		404.1	-3630.23	404.1	0.3981
		404	1211.8	1476.38	-0.71593			404	0.30928	0.38455	0.39689		404	-3614.06	404	0.39689
		403.9	1208.11	1472.21	4.14746			403.9	0.30863	0.38347	0.39586		403.9	-3598.34	403.9	0.39586
		403.8	1206.39	1468.69	5.86709			403.8	0.30814	0.38225	0.39486		403.8	-3581.44	403.8	0.39486
		403.7	1203.81	1465.39	4.36359			403.7	0.30748	0.38101	0.39372		403.7	-3564.12	403.7	0.39372
		403.6	1202.26	1462.02	2.6241			403.6	0.30683	0.38002	0.39259		403.6	-3547.75	403.6	0.39259
		403.5	1199.78	1459.34	2.3403			403.5	0.30609	0.37898	0.39159		403.5	-3534.3	403.5	0.39159
		403.4	1194.91	1455.29	3.70732			403.4	0.30521	0.37761	0.39035		403.4	-3511.36	403.4	0.39035
		403.3	1194.21	1449.91	2.53813			403.3	0.30445	0.37655	0.38951		403.3	-3498.66	403.3	0.38951
		403.2	1190.87	1445.07	-0.30284			403.2	0.3038	0.37546	0.38868		403.2	-3481.98	403.2	0.38868
		403.1	1186.68	1441.29	0.45456			403.1	0.30316	0.37436	0.38777		403.1	-3468.51	403.1	0.38777
		403	1183.82	1434.74	2.19776			403	0.30252	0.37327	0.38668		403	-3450.15	403	0.38668
		402.9	1180.17	1430.25	4.94683			402.9	0.30161	0.37181	0.38524		402.9	-3431.02	402.9	0.38524
		402.8	1177.43	1424.58	8.59576			402.8	0.30088	0.37053	0.3842		402.8	-3413.44	402.8	0.3842
		402.7	1176.91	1414.8	7.5661			402.7	0.30014	0.36924	0.38328		402.7	-3393.63	402.7	0.38328
		402.6	1173.3	1408.27	7.14747			402.6	0.29936	0.36791	0.38241		402.6	-3378.81	402.6	0.38241
		402.5	1172.46	1405.42	6.35223			402.5	0.29856	0.36651	0.38158		402.5	-3363.38	402.5	0.38158
		402.4	1168.95	1400.15	3.72551			402.4	0.29777	0.36517	0.38066		402.4	-3349.64	402.4	0.38066
		402.3	1165.54	1397.12	3.75624			402.3	0.29672	0.36367	0.3795		402.3	-3328.06	402.3	0.3795
		402.2	1159.15	1394	3.40349			402.2	0.29594	0.36249	0.37847		402.2	-3309.58	402.2	0.37847
		402.1	1154.67	1390.78	0.47324			402.1	0.29525	0.36134	0.37744		402.1	-3293.51	402.1	0.37744
		402	1151.74	1385.03	-0.70239			402	0.29459	0.36033	0.37649		402	-3276.33	402	0.37649
		401.9	1148.41	1381.56	-1.87389			401.9	0.29394	0.35944	0.37542		401.9	-3262.12	401.9	0.37542
		401.8	1146.61	1376.62	-2.66044			401.8	0.29324	0.35852	0.37424		401.8	-3249.48	401.8	0.37424
		401.7	1143.39	1369.32	-2.23369			401.7	0.29247	0.35766	0.37296		401.7	-3231.67	401.7	0.37296
		401.6	1140.46	1365.6	-0.42953			401.6	0.29152	0.35676	0.37183		401.6	-3213.28	401.6	0.37183
		401.5	1134.34	1362.46	1.79638			401.5	0.2905	0.35574	0.37076		401.5	-3198.69	401.5	0.37076
		401.4	1128.03	1358.59	2.12612			401.4	0.2895	0.35473	0.36974		401.4	-3182.75	401.4	0.36974
		401.3	1124.72	1355.33	3.0288			401.3	0.28849	0.35355	0.36883		401.3	-3163.24	401.3	0.36883
		401.2	1123.03	1348.49	1.81963			401.2	0.28758	0.3524	0.3679		401.2	-3144.75	401.2	0.3679
		401.1	1119.5	1344.23	-1.9746			401.1	0.28673	0.35123	0.36687		401.1	-3126.66	401.1	0.36687
		401	1116.56	1340.07	-3.76053			401	0.28592	0.34999	0.36584		401	-3107.06	401	0.36584
		400.9	1113.58	1335.71	-5.15307			400.9	0.28509	0.3489	0.36471		400.9	-3091.54	400.9	0.36471
		400.8	1111.11	1332.82	-2.9097			400.8	0.28428	0.34778	0.36357		400.8	-3072.37	400.8	0.36357
		400.7	1108.68	1331.45	-2.37975			400.7	0.28335	0.34668	0.36249		400.7	-3052.01	400.7	0.36249
		400.6	1102.06	1327.13	-3.46188			400.6	0.28243	0.34563	0.36138		400.6	-3039.75	400.6	0.36138
		400.5	1098.64	1322.92	-3.57708			400.5	0.28132	0.34459	0.36025		400.5	-3026.09	400.5	0.36025
		400.4	1093.32	1317.73	-4.22593			400.4	0.28022	0.34348	0.3592		400.4	-3011.54	400.4	0.3592
		400.3	1088.39	1313.79	-5.45193			400.3	0.2791	0.34231	0.35804		400.3	-2995.59	400.3	0.35804
[truncated: 503 more rows]
