# Supplementary material for: Achieving Robust Cholesteric Liquid Crystal Polymer Networks with High Luminescence Dissymmetry Factor
Source: Research Square preprint supplement (doi:10.21203/rs.3.rs-7436711/v1), 2025-09-17
Supplement: Supplementary file 14 [file ea99c90dd0acfd705f3d3e73.xlsx]

## Sheet: Sheet1
	(S-M)0.01-(FC6)0.98-(GDMD)0.01	(R-M)0.01-(FC6)0.98-(GDMD)0.01
0	0.5887	-0.56158
30	0.59637	-0.59368
35	0.59508	-0.60837
40	0.56198	-0.65928
45	0.61714	-0.61375
50	0.56624	-0.5545
55	0.53422	-0.50529
60	0.53995	-0.54032
