# Supplementary material for: Achieving Robust Cholesteric Liquid Crystal Polymer Networks with High Luminescence Dissymmetry Factor
Source: Research Square preprint supplement (doi:10.21203/rs.3.rs-7436711/v1), 2025-09-17
Supplement: Supplementary file 15 [file eaa71a57ca28b40806505553.xlsx]

## Sheet: Sheet1
CPL					CD
	(S-M)0.01-(PC6)0.99	(S-M)0.03-(PC6)0.97	(S-M)0.05-(PC6)0.95	(S-M)0.1-(PC6)0.9		(S-M)0.01-(PC6)0.99	(S-M)0.03-(PC6)0.97	(S-M)0.05-(PC6)0.95	(S-M)0.1-(PC6)0.9
700	0.76539	0.82077	0.78985	1.05783	700	0.00445	0.00428	0.00457	0.00454
699.9	0.87324	0.88049	0.75774	1.09594	699.9	0.00443	0.00428	0.00457	0.00451
699.8	0.93524	0.80623	0.75103	0.97745	699.8	0.00443	0.00428	0.00457	0.00452
699.7	0.89213	0.75494	0.69796	0.97621	699.7	0.00442	0.00428	0.0046	0.00448
699.6	0.79406	0.68647	0.65365	1.03783	699.6	0.00444	0.00427	0.0046	0.0045
699.5	0.8101	0.66245	0.59463	0.95391	699.5	0.00446	0.00429	0.00459	0.00451
699.4	0.75826	0.59762	0.55412	0.97932	699.4	0.00446	0.00425	0.00458	0.00454
699.3	0.71481	0.46364	0.54448	0.90606	699.3	0.00447	0.00422	0.00457	0.00455
699.2	0.66917	0.53705	0.4235	0.86973	699.2	0.0045	0.00424	0.00455	0.00452
699.1	0.68055	0.53302	0.42101	0.91219	699.1	0.00448	0.00424	0.00454	0.00449
699	0.63658	0.4862	0.49952	0.81917	699	0.00445	0.00425	0.00453	0.00445
698.9	0.62742	0.40589	0.59135	0.91808	698.9	0.00445	0.00426	0.00452	0.00444
698.8	0.56025	0.33896	0.6599	0.78413	698.8	0.00446	0.00424	0.00455	0.00443
698.7	0.65916	0.34359	0.64017	0.82733	698.7	0.00444	0.00425	0.00457	0.00446
698.6	0.72649	0.32254	0.64786	0.7758	698.6	0.00445	0.00421	0.00454	0.00443
698.5	0.68102	0.3828	0.60152	0.76437	698.5	0.00446	0.00422	0.00453	0.00442
698.4	0.6523	0.3746	0.57794	0.79136	698.4	0.00443	0.00421	0.00451	0.00447
698.3	0.68878	0.34062	0.57108	0.75387	698.3	0.00445	0.00421	0.00453	0.00448
698.2	0.57231	0.31628	0.73835	0.68644	698.2	0.00444	0.00419	0.00454	0.00449
698.1	0.54934	0.33872	0.6595	0.81078	698.1	0.00443	0.00419	0.00453	0.00446
698	0.60116	0.29516	0.44311	0.74536	698	0.00444	0.00418	0.00457	0.0045
697.9	0.67565	0.24822	0.42413	0.78924	697.9	0.00442	0.00419	0.00454	0.00452
697.8	0.57668	0.22657	0.42319	0.75341	697.8	0.00443	0.0042	0.00455	0.00451
697.7	0.6904	0.35417	0.40329	0.83081	697.7	0.00444	0.00417	0.00457	0.0045
697.6	0.65083	0.28458	0.50331	0.77516	697.6	0.00444	0.00418	0.00461	0.00447
697.5	0.65158	0.25091	0.48967	0.8274	697.5	0.00445	0.00419	0.00461	0.0045
697.4	0.64512	0.29162	0.4214	0.89765	697.4	0.00447	0.00421	0.00461	0.00446
697.3	0.55476	0.19999	0.39848	0.9661	697.3	0.0045	0.00422	0.00465	0.00446
697.2	0.64989	0.19991	0.35951	1.04895	697.2	0.00452	0.00427	0.00469	0.00444
697.1	0.7199	0.19107	0.30772	0.97561	697.1	0.00453	0.00431	0.00469	0.00444
697	0.74386	0.14276	0.37466	0.91059	697	0.00455	0.00427	0.00467	0.00446
696.9	0.7891	0.14392	0.3174	0.89339	696.9	0.00456	0.00428	0.00471	0.00446
696.8	0.76842	0.15899	0.22762	0.89154	696.8	0.00454	0.00427	0.00476	0.00447
696.7	0.72917	0.17324	0.2488	0.86301	696.7	0.00455	0.00429	0.00477	0.00446
696.6	0.67858	0.21575	0.25293	0.9283	696.6	0.00455	0.00431	0.00476	0.00447
696.5	0.67805	0.20902	0.22293	0.91946	696.5	0.00456	0.00431	0.00473	0.00445
696.4	0.71025	0.25611	0.19613	0.89276	696.4	0.00454	0.00432	0.0047	0.00447
696.3	0.61282	0.18423	0.25414	0.87838	696.3	0.00454	0.00436	0.00469	0.00446
696.2	0.66909	0.25083	0.38312	0.9296	696.2	0.00453	0.00435	0.00469	0.00444
696.1	0.65035	0.3531	0.28725	1.06733	696.1	0.00456	0.0044	0.00468	0.00445
696	0.75136	0.37517	0.38986	1.08472	696	0.00456	0.00439	0.00469	0.00447
695.9	0.78865	0.33804	0.40476	1.08585	695.9	0.00461	0.0044	0.00472	0.00449
695.8	0.79513	0.38153	0.36511	1.14369	695.8	0.00466	0.00441	0.00473	0.00448
695.7	0.84141	0.365	0.39079	1.11137	695.7	0.00465	0.00442	0.00475	0.00449
695.6	0.79355	0.45644	0.32712	1.22145	695.6	0.00466	0.00443	0.00474	0.00447
695.5	0.72207	0.55613	0.38535	1.23616	695.5	0.00466	0.00443	0.00473	0.00449
695.4	0.67583	0.5291	0.39011	1.25318	695.4	0.00467	0.00449	0.00471	0.00448
695.3	0.70139	0.49508	0.35347	1.21382	695.3	0.00468	0.00448	0.00473	0.00449
695.2	0.73304	0.40521	0.39795	1.13191	695.2	0.00467	0.00447	0.00474	0.00448
695.1	0.66208	0.448	0.32461	1.19764	695.1	0.00467	0.00443	0.00473	0.00445
695	0.74641	0.58209	0.22206	1.12536	695	0.0047	0.00445	0.00471	0.00447
694.9	0.86932	0.53779	0.18673	1.04177	694.9	0.0047	0.00447	0.00473	0.00446
694.8	0.85661	0.56527	0.27357	1.00016	694.8	0.00469	0.00445	0.00472	0.00444
694.7	0.82547	0.61293	0.13447	0.91263	694.7	0.00469	0.00448	0.00477	0.00443
694.6	0.89191	0.55142	0.28498	0.96879	694.6	0.00467	0.00447	0.00481	0.00443
694.5	0.82421	0.47976	0.32702	0.93065	694.5	0.00469	0.0045	0.00478	0.00448
694.4	0.89272	0.56695	0.30183	0.95346	694.4	0.00468	0.00449	0.00476	0.00453
694.3	0.81708	0.49023	0.28702	0.91015	694.3	0.00471	0.00452	0.00473	0.0045
694.2	0.85295	0.47011	0.24485	0.80653	694.2	0.00471	0.00451	0.00473	0.00454
694.1	0.91861	0.61989	0.18783	0.78299	694.1	0.00467	0.00453	0.00469	0.00453
694	0.79221	0.68438	0.20545	0.71534	694	0.00467	0.00454	0.00465	0.00456
693.9	0.67761	0.73179	0.12981	0.74904	693.9	0.00466	0.00451	0.0046	0.00457
693.8	0.54386	0.71589	0.09178	0.79278	693.8	0.00465	0.00453	0.00459	0.00456
693.7	0.48513	0.72932	0.07457	0.80138	693.7	0.00465	0.00455	0.00459	0.0046
693.6	0.46986	0.81192	0.18135	0.71258	693.6	0.00467	0.00454	0.00457	0.00461
693.5	0.41913	0.81274	0.18196	0.60496	693.5	0.0047	0.00452	0.00456	0.00463
693.4	0.52803	0.7539	0.23373	0.66655	693.4	0.00471	0.00453	0.00458	0.00465
693.3	0.45742	0.79854	0.18779	0.49329	693.3	0.00471	0.00451	0.00459	0.00466
693.2	0.50298	0.80882	0.28109	0.3949	693.2	0.00472	0.00449	0.0046	0.00467
693.1	0.58065	0.86966	0.18115	0.49812	693.1	0.00471	0.00448	0.00462	0.00469
693	0.53467	0.7509	0.16751	0.44563	693	0.00472	0.00449	0.00464	0.0047
692.9	0.47776	0.72045	0.21089	0.33326	692.9	0.0047	0.00447	0.00467	0.00469
692.8	0.45563	0.6526	0.34195	0.29134	692.8	0.00472	0.00447	0.00468	0.0047
692.7	0.35853	0.61344	0.29201	0.32377	692.7	0.0047	0.00447	0.00469	0.00469
692.6	0.33544	0.71497	0.26336	0.34597	692.6	0.00468	0.00449	0.00471	0.0047
692.5	0.40744	0.77604	0.23881	0.22752	692.5	0.00465	0.00443	0.0047	0.00471
692.4	0.42592	0.69492	0.349	0.25397	692.4	0.00467	0.00443	0.00474	0.0047
692.3	0.38579	0.60719	0.33135	0.27446	692.3	0.00466	0.00443	0.00475	0.00474
692.2	0.3242	0.58373	0.1713	0.27195	692.2	0.00463	0.00445	0.00475	0.00475
692.1	0.39678	0.60679	0.09668	0.3141	692.1	0.00463	0.00441	0.00477	0.00476
692	0.47405	0.58453	0.16054	0.3802	692	0.00461	0.00443	0.00482	0.00474
691.9	0.46347	0.63305	0.15579	0.42533	691.9	0.00464	0.00447	0.00479	0.00475
691.8	0.5092	0.56525	0.12659	0.46434	691.8	0.00465	0.00446	0.00481	0.00477
691.7	0.46679	0.49437	0.05961	0.43279	691.7	0.00463	0.00445	0.00482	0.00477
691.6	0.44834	0.67017	0.12336	0.47395	691.6	0.00465	0.00447	0.00479	0.00477
691.5	0.40638	0.63898	0.14094	0.46983	691.5	0.00465	0.0045	0.00479	0.00479
691.4	0.32513	0.66282	0.28775	0.52516	691.4	0.00467	0.0045	0.00477	0.00477
691.3	0.33394	0.62377	0.26667	0.3999	691.3	0.00471	0.00449	0.00473	0.00478
691.2	0.38551	0.55922	0.30286	0.39914	691.2	0.00471	0.00448	0.00474	0.00477
691.1	0.38698	0.68369	0.26416	0.38706	691.1	0.0047	0.0045	0.0047	0.00472
691	0.40696	0.70704	0.26189	0.3098	691	0.00469	0.00452	0.00472	0.00476
690.9	0.32447	0.76107	0.35019	0.36515	690.9	0.00468	0.00452	0.00476	0.00474
690.8	0.27581	0.71609	0.41603	0.3676	690.8	0.00469	0.00454	0.00479	0.00475
690.7	0.22836	0.72332	0.53927	0.42464	690.7	0.00468	0.00454	0.00478	0.00474
690.6	0.27054	0.70555	0.60675	0.4527	690.6	0.0047	0.00452	0.00481	0.00473
690.5	0.38945	0.63614	0.67011	0.4572	690.5	0.00472	0.00451	0.00488	0.00474
690.4	0.46621	0.66551	0.68375	0.45094	690.4	0.0047	0.00449	0.00487	0.00472
690.3	0.45721	0.66486	0.59503	0.45393	690.3	0.00471	0.00451	0.00486	0.00471
690.2	0.48032	0.61118	0.50683	0.46815	690.2	0.00472	0.0045	0.00487	0.00469
690.1	0.50816	0.55267	0.47836	0.52796	690.1	0.00472	0.00454	0.0049	0.00471
690	0.42638	0.60598	0.52918	0.53806	690	0.00472	0.00456	0.0049	0.00472
689.9	0.47679	0.59924	0.49968	0.71412	689.9	0.00476	0.00457	0.00489	0.00469
689.8	0.41588	0.6793	0.59577	0.722	689.8	0.00476	0.00458	0.00494	0.00472
689.7	0.32588	0.77912	0.71627	0.65567	689.7	0.00479	0.00459	0.00495	0.00472
689.6	0.39178	0.79644	0.69855	0.73442	689.6	0.00479	0.00459	0.00498	0.00472
689.5	0.42728	0.85648	0.71779	0.8045	689.5	0.00481	0.0046	0.00501	0.00476
689.4	0.37952	0.86238	0.73105	0.90264	689.4	0.0048	0.00459	0.00499	0.00478
689.3	0.45989	0.94781	0.79267	0.89442	689.3	0.00479	0.00459	0.00497	0.00478
689.2	0.48216	0.88627	0.86032	0.89973	689.2	0.00478	0.0046	0.00498	0.00482
689.1	0.48813	0.87928	0.84738	0.98592	689.1	0.00479	0.00464	0.00499	0.00483
689	0.51508	0.95834	0.79152	1.02173	689	0.00481	0.00464	0.00498	0.00483
688.9	0.52505	1.04801	0.69591	0.90967	688.9	0.0048	0.00466	0.00496	0.00482
688.8	0.67264	1.172	0.88608	0.8493	688.8	0.00484	0.00467	0.00494	0.00482
688.7	0.72043	1.20921	0.8413	0.89137	688.7	0.00484	0.00465	0.00499	0.00483
688.6	0.66474	1.25098	0.83734	0.87005	688.6	0.00483	0.00465	0.00496	0.00484
688.5	0.55391	1.21356	0.85191	0.84626	688.5	0.00483	0.00464	0.00498	0.00485
688.4	0.52509	1.2533	0.90702	0.7754	688.4	0.00484	0.00467	0.00497	0.00486
688.3	0.51509	1.26529	1.09525	0.71445	688.3	0.00484	0.00469	0.00499	0.00488
688.2	0.49774	1.24389	1.04242	0.8044	688.2	0.00487	0.0047	0.00501	0.00486
688.1	0.51091	1.175	1.0307	0.69344	688.1	0.00487	0.00466	0.00504	0.00485
688	0.58366	1.09605	1.11462	0.71175	688	0.00488	0.00465	0.00501	0.00491
687.9	0.58533	1.06813	1.10915	0.78181	687.9	0.00486	0.00466	0.00502	0.00495
687.8	0.57475	1.16908	1.14406	0.91845	687.8	0.00484	0.00469	0.00504	0.00494
687.7	0.52581	1.19088	1.22142	0.8226	687.7	0.00484	0.0047	0.0051	0.00495
687.6	0.56367	1.18278	1.2927	0.72821	687.6	0.00486	0.00467	0.0051	0.00499
687.5	0.57754	1.20407	1.22293	0.75556	687.5	0.0049	0.00465	0.00507	0.00499
687.4	0.63533	1.16615	1.13468	0.84618	687.4	0.00493	0.00465	0.00508	0.005
687.3	0.67825	1.08582	1.01891	0.84365	687.3	0.00494	0.00468	0.00509	0.00502
687.2	0.65968	1.0488	1.02044	0.73488	687.2	0.00491	0.00467	0.00506	0.00503
687.1	0.6662	1.03812	1.07554	0.82122	687.1	0.00492	0.00471	0.00507	0.00506
687	0.66677	1.0472	0.94656	0.88137	687	0.00495	0.00476	0.0051	0.00506
686.9	0.58695	1.08969	1.00575	0.87758	686.9	0.00494	0.00473	0.00517	0.00507
686.8	0.66055	0.96708	1.06193	0.93612	686.8	0.00497	0.00476	0.00515	0.00507
686.7	0.65843	0.96422	1.1285	1.05348	686.7	0.00496	0.00475	0.00516	0.00508
686.6	0.78453	1.03722	1.13935	0.96528	686.6	0.00494	0.00476	0.00514	0.00507
686.5	0.73791	1.01144	1.04325	0.98761	686.5	0.00494	0.00475	0.00514	0.0051
686.4	0.63662	0.93914	1.10231	0.90422	686.4	0.00489	0.00474	0.0052	0.00513
686.3	0.69611	0.83909	1.06425	0.87767	686.3	0.00492	0.00474	0.00513	0.00512
686.2	0.83758	0.89985	1.0154	0.9621	686.2	0.00492	0.00475	0.00512	0.00512
686.1	0.7696	0.92783	1.01491	0.77962	686.1	0.00493	0.00471	0.0051	0.00511
686	0.75402	0.85807	0.9748	0.81185	686	0.00493	0.0047	0.00513	0.00508
685.9	0.82407	0.97787	0.87857	0.77061	685.9	0.00494	0.00468	0.00517	0.00511
685.8	0.81564	0.94567	0.88861	0.7225	685.8	0.00498	0.00467	0.00517	0.00507
685.7	0.74882	0.97397	0.77401	0.74945	685.7	0.00498	0.00466	0.00514	0.00505
685.6	0.75585	0.91419	0.85031	0.70549	685.6	0.00498	0.00468	0.00514	0.00505
685.5	0.78657	0.83739	0.8678	0.65997	685.5	0.00496	0.0047	0.00514	0.00507
685.4	0.72273	0.8028	0.77085	0.68617	685.4	0.00497	0.00468	0.00519	0.00508
685.3	0.69213	0.67343	0.7903	0.81273	685.3	0.00499	0.00469	0.00518	0.00506
685.2	0.77256	0.7023	0.73634	0.72674	685.2	0.005	0.00468	0.00517	0.00509
685.1	0.88091	0.6901	0.8277	0.80318	685.1	0.00499	0.00468	0.00516	0.00508
685	0.94929	0.70226	0.87012	0.81496	685	0.00501	0.00468	0.00518	0.00506
684.9	0.98094	0.68331	0.86672	0.86401	684.9	0.00502	0.00466	0.00518	0.00509
684.8	0.98324	0.63422	0.79681	0.91658	684.8	0.00502	0.00471	0.00518	0.00508
684.7	0.95688	0.61084	0.85948	0.9159	684.7	0.00504	0.00471	0.00515	0.00509
684.6	0.95439	0.60517	0.80871	0.96044	684.6	0.00504	0.00471	0.00516	0.0051
684.5	0.91574	0.57938	0.80297	1.11048	684.5	0.00505	0.00474	0.00516	0.0051
684.4	1.0039	0.61551	0.73833	1.05095	684.4	0.00506	0.00471	0.00516	0.00508
684.3	1.01073	0.66556	0.63324	1.12878	684.3	0.0051	0.00468	0.00513	0.00509
684.2	0.99786	0.60123	0.71019	1.25648	684.2	0.00506	0.00472	0.00513	0.00508
684.1	1.00691	0.59139	0.5698	1.24614	684.1	0.00505	0.00472	0.00514	0.00506
684	1.02122	0.51939	0.59032	1.14897	684	0.00503	0.00471	0.00516	0.00508
683.9	1.00128	0.51677	0.64089	1.16037	683.9	0.00504	0.00467	0.00515	0.00508
683.8	1.07026	0.52834	0.59992	1.2446	683.8	0.00506	0.00465	0.00521	0.00507
683.7	0.99981	0.51266	0.56157	1.19616	683.7	0.00507	0.00467	0.0052	0.00505
683.6	0.98063	0.43949	0.62347	1.17273	683.6	0.00506	0.00464	0.00518	0.00506
683.5	0.95423	0.39983	0.57705	1.15022	683.5	0.00508	0.00468	0.00512	0.00506
683.4	0.87518	0.49782	0.67462	1.25384	683.4	0.00507	0.00466	0.00513	0.00504
683.3	0.81832	0.53327	0.59449	1.24534	683.3	0.00508	0.00467	0.00509	0.00502
683.2	0.76452	0.54478	0.64028	1.31023	683.2	0.00506	0.00465	0.0051	0.00504
683.1	0.83449	0.65202	0.53549	1.29344	683.1	0.00507	0.00465	0.00511	0.00502
683	0.89426	0.79126	0.44504	1.29736	683	0.00508	0.00463	0.00511	0.00503
682.9	0.80773	0.77588	0.46296	1.26173	682.9	0.00507	0.00464	0.00508	0.00505
682.8	0.81108	0.71319	0.47829	1.2739	682.8	0.00508	0.00466	0.00514	0.00508
682.7	0.78416	0.63973	0.40616	1.33111	682.7	0.00505	0.00471	0.00513	0.00508
682.6	0.81543	0.62234	0.38977	1.24234	682.6	0.00507	0.00473	0.00511	0.00508
682.5	0.80506	0.58219	0.42212	1.14414	682.5	0.00506	0.00477	0.00512	0.00509
682.4	0.9871	0.55127	0.47156	1.14087	682.4	0.00507	0.00478	0.00514	0.00511
682.3	0.99279	0.58176	0.44248	1.06345	682.3	0.00505	0.00478	0.00515	0.00513
682.2	0.98552	0.55495	0.42241	1.16421	682.2	0.00507	0.00478	0.00518	0.00513
682.1	0.98031	0.55114	0.51698	1.21083	682.1	0.00508	0.00479	0.00519	0.00514
682	0.97484	0.58628	0.49297	1.15059	682	0.00507	0.00481	0.00515	0.00516
681.9	0.83729	0.58172	0.43829	1.11897	681.9	0.0051	0.00481	0.00516	0.00517
681.8	0.77565	0.58325	0.37199	1.20976	681.8	0.0051	0.00482	0.00518	0.00518
681.7	0.74246	0.57977	0.45793	1.21178	681.7	0.00508	0.00481	0.00517	0.00519
681.6	0.71651	0.55345	0.38838	1.17084	681.6	0.00511	0.00483	0.00517	0.00515
681.5	0.72061	0.65321	0.43934	1.0875	681.5	0.00511	0.00481	0.00515	0.00516
681.4	0.89334	0.63576	0.53984	1.1157	681.4	0.00508	0.00483	0.00516	0.0052
681.3	0.77479	0.66081	0.54035	1.07986	681.3	0.00507	0.00484	0.0052	0.00521
681.2	0.78265	0.55966	0.62512	1.04428	681.2	0.00507	0.00483	0.00523	0.00518
681.1	0.73816	0.60665	0.68083	0.98465	681.1	0.00507	0.00489	0.00523	0.0052
681	0.66232	0.55543	0.61151	0.9765	681	0.00508	0.00489	0.00525	0.00519
680.9	0.71243	0.53524	0.52755	0.92949	680.9	0.00509	0.00489	0.00525	0.0052
680.8	0.76344	0.49789	0.51404	1.08522	680.8	0.00513	0.00491	0.00527	0.00521
680.7	0.69016	0.62878	0.58722	1.06232	680.7	0.00511	0.00494	0.00523	0.0052
680.6	0.67278	0.6365	0.60419	0.87461	680.6	0.0051	0.00498	0.00522	0.00526
680.5	0.70387	0.74215	0.62675	0.85429	680.5	0.00511	0.00496	0.00521	0.00527
680.4	0.66219	0.86288	0.58452	0.84122	680.4	0.00513	0.00498	0.00521	0.0053
680.3	0.67415	0.87012	0.69233	0.83228	680.3	0.00514	0.005	0.00521	0.00532
680.2	0.74457	0.90326	0.61849	0.78828	680.2	0.00512	0.00501	0.00523	0.00532
680.1	0.82033	0.85785	0.56514	0.6976	680.1	0.0051	0.005	0.00527	0.00537
680	0.7912	0.8543	0.60288	0.67796	680	0.00515	0.00505	0.0053	0.00538
679.9	0.79181	0.73145	0.59888	0.67863	679.9	0.00518	0.00508	0.00528	0.00536
679.8	0.76916	0.72414	0.62074	0.76488	679.8	0.00518	0.00508	0.00526	0.00535
679.7	0.82303	0.79253	0.74741	0.79769	679.7	0.00522	0.00508	0.0053	0.00531
679.6	0.78898	0.70789	0.81621	0.89369	679.6	0.00522	0.00508	0.0053	0.00532
679.5	0.8473	0.85657	0.74158	0.83458	679.5	0.00524	0.00509	0.00531	0.0053
679.4	0.8607	0.84424	0.74171	0.99326	679.4	0.00524	0.00512	0.00531	0.00532
679.3	0.88197	0.86261	0.66744	1.01457	679.3	0.00521	0.00512	0.0053	0.00531
679.2	0.76851	0.85493	0.57103	1.04739	679.2	0.00522	0.00512	0.00532	0.00534
679.1	0.75175	0.86759	0.54526	1.14082	679.1	0.00523	0.00514	0.00534	0.00536
679	0.76067	0.87327	0.46733	1.15417	679	0.0052	0.00515	0.00533	0.00535
678.9	0.70687	0.90186	0.44251	1.15809	678.9	0.00522	0.00518	0.0053	0.00533
678.8	0.68539	0.89072	0.62556	1.11404	678.8	0.00523	0.00517	0.00533	0.00533
678.7	0.82743	0.95693	0.84218	1.16998	678.7	0.00521	0.00519	0.00535	0.00537
678.6	0.85892	0.95093	0.88322	1.08143	678.6	0.00525	0.0052	0.00537	0.00533
678.5	0.86441	0.94653	0.81792	1.08957	678.5	0.00524	0.00522	0.00535	0.00538
678.4	0.89696	0.91584	0.91947	1.17154	678.4	0.00522	0.00523	0.00536	0.00538
678.3	0.823	0.9772	0.93814	1.28715	678.3	0.00521	0.00522	0.00543	0.0054
678.2	0.79648	0.9505	0.8359	1.17177	678.2	0.00523	0.00523	0.00544	0.00541
678.1	0.83676	1.11006	0.97176	1.0701	678.1	0.00526	0.00522	0.00545	0.00539
678	0.80736	1.13521	0.89969	0.9523	678	0.00524	0.00523	0.00548	0.00543
677.9	0.82647	1.14689	0.88477	0.88752	677.9	0.00526	0.00522	0.00548	0.00546
677.8	0.8356	1.16147	0.85255	0.82113	677.8	0.00524	0.00524	0.00552	0.00548
677.7	0.83664	1.17296	0.85967	0.84651	677.7	0.00527	0.00523	0.0055	0.00545
677.6	0.7824	1.08461	0.89739	0.70302	677.6	0.00526	0.00526	0.00554	0.00543
677.5	0.80391	1.04808	0.93763	0.7368	677.5	0.00531	0.00526	0.00556	0.00542
677.4	0.76871	0.9851	0.93087	0.82688	677.4	0.00531	0.00524	0.00557	0.00539
677.3	0.88302	0.96109	0.9539	0.82968	677.3	0.00529	0.00525	0.00556	0.00537
677.2	0.85727	1.00295	0.98087	0.81314	677.2	0.00528	0.00525	0.00555	0.00539
677.1	0.82626	1.03717	1.03254	0.78656	677.1	0.00528	0.00523	0.0056	0.00539
677	0.80434	1.08134	1.00464	0.82787	677	0.00528	0.00525	0.00556	0.00536
676.9	0.87772	1.14546	0.98755	0.87395	676.9	0.00526	0.00527	0.00553	0.00537
676.8	0.86458	0.96356	0.89103	0.87305	676.8	0.00525	0.00529	0.00559	0.00534
676.7	0.84544	0.89659	1.0277	0.78582	676.7	0.00528	0.0053	0.0056	0.00535
676.6	0.7969	0.84931	0.94604	0.74926	676.6	0.00529	0.00533	0.00562	0.00538
676.5	0.82775	0.72981	0.85933	0.58765	676.5	0.00528	0.00533	0.00561	0.00537
676.4	0.84992	0.78131	0.94584	0.47183	676.4	0.00529	0.00532	0.0056	0.00537
676.3	0.79576	0.75994	0.92908	0.51487	676.3	0.00529	0.00528	0.00558	0.00537
676.2	0.6215	0.81542	1.02806	0.43012	676.2	0.00532	0.00529	0.00561	0.00538
676.1	0.5822	0.76687	1.0301	0.4321	676.1	0.00534	0.00528	0.00562	0.00541
676	0.64845	0.84792	1.15786	0.45728	676	0.00535	0.00529	0.00561	0.00541
675.9	0.74432	0.71146	1.16371	0.44828	675.9	0.00535	0.00532	0.00558	0.00541
675.8	0.71908	0.73077	1.13069	0.36315	675.8	0.00536	0.00531	0.00558	0.00544
675.7	0.84922	0.73546	1.0491	0.39119	675.7	0.00538	0.0053	0.0056	0.00543
675.6	0.74297	0.60081	0.9105	0.36312	675.6	0.00536	0.0053	0.00561	0.00539
675.5	0.70349	0.70634	0.80482	0.40195	675.5	0.00535	0.00534	0.00557	0.00546
675.4	0.65914	0.75638	0.79856	0.41072	675.4	0.00537	0.00534	0.00557	0.00547
675.3	0.64831	0.81459	0.7846	0.32688	675.3	0.00539	0.00536	0.00559	0.00549
675.2	0.67757	0.75349	0.68078	0.18948	675.2	0.00542	0.00538	0.00556	0.0055
675.1	0.76692	0.67296	0.67899	0.18149	675.1	0.00547	0.00539	0.00558	0.00549
675	0.69129	0.52452	0.57306	0.31078	675	0.00547	0.00539	0.00559	0.00549
674.9	0.75185	0.55275	0.45909	0.38178	674.9	0.00547	0.00538	0.00558	0.00547
674.8	0.70995	0.54804	0.47754	0.42017	674.8	0.00545	0.00538	0.00559	0.00542
674.7	0.74355	0.59079	0.53958	0.35125	674.7	0.00553	0.0054	0.00559	0.00549
674.6	0.6673	0.59703	0.62175	0.37066	674.6	0.0055	0.0054	0.00561	0.00546
674.5	0.71485	0.73206	0.57088	0.52457	674.5	0.00548	0.00541	0.00561	0.00551
674.4	0.7093	0.69131	0.52357	0.62562	674.4	0.00544	0.00541	0.00559	0.00554
674.3	0.74179	0.69799	0.33606	0.54981	674.3	0.00545	0.00545	0.00562	0.00557
674.2	0.73444	0.65816	0.40605	0.56881	674.2	0.00547	0.00547	0.00566	0.00555
674.1	0.77534	0.75279	0.34096	0.55463	674.1	0.00549	0.00545	0.00567	0.00556
674	0.80605	0.75757	0.35589	0.48513	674	0.0055	0.00545	0.00565	0.00557
673.9	0.76237	0.53028	0.34561	0.4312	673.9	0.00553	0.00547	0.0057	0.00557
673.8	0.69589	0.38049	0.49572	0.33353	673.8	0.00555	0.00548	0.00573	0.00562
673.7	0.63022	0.49207	0.54233	0.38623	673.7	0.00553	0.00545	0.00574	0.00567
673.6	0.72649	0.64529	0.57959	0.39831	673.6	0.00552	0.00547	0.00577	0.00568
673.5	0.788	0.73588	0.61425	0.57891	673.5	0.00553	0.00545	0.00575	0.00568
673.4	0.86122	0.77747	0.5737	0.67081	673.4	0.00555	0.00547	0.00573	0.00572
673.3	0.81895	0.88508	0.64507	0.76038	673.3	0.00557	0.00547	0.00573	0.00573
673.2	0.76733	0.77554	0.57455	0.74983	673.2	0.00559	0.00551	0.00576	0.00574
673.1	0.92523	0.70723	0.58545	0.575	673.1	0.00561	0.00553	0.00579	0.00572
673	0.98037	0.62952	0.4882	0.62016	673	0.00563	0.00552	0.00577	0.00573
672.9	0.98215	0.65904	0.44669	0.70804	672.9	0.00563	0.00553	0.00576	0.00574
672.8	0.93526	0.63601	0.38923	0.58869	672.8	0.00564	0.00552	0.00577	0.00577
672.7	0.88482	0.72782	0.44614	0.51789	672.7	0.00565	0.00551	0.00581	0.00578
672.6	0.80943	0.7366	0.55386	0.45903	672.6	0.00565	0.00552	0.00581	0.0058
672.5	0.90579	0.8447	0.58029	0.46324	672.5	0.00566	0.00554	0.00584	0.00583
672.4	0.89764	0.88334	0.73854	0.26388	672.4	0.0057	0.00555	0.00589	0.00584
672.3	0.88876	0.77161	0.80014	0.27573	672.3	0.0057	0.00551	0.00588	0.00584
672.2	0.98437	0.83007	0.72023	0.40681	672.2	0.00573	0.00551	0.00588	0.00581
672.1	0.91357	0.85304	0.72201	0.53398	672.1	0.00569	0.00552	0.00587	0.00583
672	0.78868	0.84912	0.67977	0.60288	672	0.00568	0.00552	0.00588	0.00584
671.9	0.69375	1.0182	0.67723	0.64633	671.9	0.00567	0.00552	0.00586	0.00583
671.8	0.73599	1.06984	0.73905	0.64639	671.8	0.00567	0.00552	0.00586	0.00587
671.7	0.81335	1.07842	0.7405	0.65702	671.7	0.00567	0.00554	0.00585	0.00585
671.6	0.8136	0.9654	0.80394	0.7196	671.6	0.00568	0.00553	0.00585	0.00588
671.5	0.86767	0.99378	0.71121	0.89307	671.5	0.00566	0.00552	0.00587	0.00589
671.4	0.94008	0.97616	0.6617	0.88305	671.4	0.00568	0.0055	0.00586	0.00589
671.3	0.9389	0.9169	0.51587	0.85671	671.3	0.00571	0.00551	0.00589	0.0059
671.2	0.82108	0.99019	0.60764	0.89917	671.2	0.00573	0.00553	0.00591	0.00588
671.1	0.75531	0.93841	0.58487	0.77703	671.1	0.00572	0.00552	0.00592	0.00591
671	0.65854	0.84011	0.45182	0.75595	671	0.00571	0.00549	0.00592	0.00596
670.9	0.5304	0.80193	0.37502	0.83141	670.9	0.00569	0.00551	0.00593	0.00596
670.8	0.55243	0.82815	0.26315	0.93714	670.8	0.00571	0.00552	0.00593	0.00597
670.7	0.62296	0.94891	0.26244	1.09573	670.7	0.00575	0.00552	0.00597	0.00599
670.6	0.70676	1.02878	0.16931	1.15597	670.6	0.00574	0.00553	0.00596	0.00596
670.5	0.74436	1.09033	0.14475	1.21462	670.5	0.00576	0.00555	0.00597	0.00598
670.4	0.69688	1.05619	0.00807	1.14735	670.4	0.00577	0.00554	0.00596	0.00597
670.3	0.70647	1.06074	-0.06638	1.10111	670.3	0.00575	0.00554	0.006	0.00598
670.2	0.60868	1.01691	-0.04451	0.96255	670.2	0.00575	0.00553	0.006	0.00597
670.1	0.60738	0.96693	-0.15764	0.94995	670.1	0.00575	0.00556	0.00604	0.00599
670	0.68431	0.87924	-0.03624	1.03081	670	0.00575	0.00556	0.00602	0.00601
669.9	0.65399	1.02492	0.01449	1.40492	669.9	0.00579	0.00559	0.00603	0.00603
669.8	0.60224	1.11256	0.05409	1.415	669.8	0.0058	0.0056	0.00604	0.00602
669.7	0.59035	0.97271	0.07123	1.26813	669.7	0.00583	0.00562	0.00606	0.006
669.6	0.51066	0.93044	0.03956	1.28617	669.6	0.00585	0.00562	0.00608	0.00599
669.5	0.39652	0.87515	0.05385	1.27187	669.5	0.00584	0.00563	0.0061	0.006
669.4	0.42003	0.88208	0.03944	1.44112	669.4	0.00588	0.00568	0.0061	0.00602
669.3	0.34448	0.8392	-0.06267	1.34422	669.3	0.00588	0.0057	0.0061	0.00602
669.2	0.28411	0.75943	-0.21936	1.34659	669.2	0.00586	0.00568	0.00612	0.00602
669.1	0.35534	0.79216	-0.24549	1.35413	669.1	0.00586	0.00571	0.0061	0.00599
669	0.18443	0.76846	-0.23498	1.29959	669	0.00585	0.00569	0.00608	0.00603
668.9	0.20718	0.63218	-0.25812	1.37971	668.9	0.00589	0.00571	0.00609	0.00605
668.8	0.24988	0.68273	-0.24867	1.40221	668.8	0.00594	0.00572	0.00609	0.00605
668.7	0.2718	0.62143	-0.1653	1.37526	668.7	0.00592	0.00573	0.00611	0.00609
668.6	0.19503	0.7002	-0.26373	1.3656	668.6	0.00594	0.00573	0.00612	0.00609
668.5	0.19384	0.6341	-0.17854	1.32209	668.5	0.00594	0.00572	0.00613	0.00612
668.4	0.15485	0.63087	-0.10504	1.23913	668.4	0.00595	0.00574	0.00613	0.00613
668.3	0.07434	0.57555	-0.02384	1.30221	668.3	0.00595	0.00575	0.00614	0.00613
668.2	0.02282	0.6584	0.10871	1.04174	668.2	0.00596	0.00579	0.00617	0.00611
668.1	-0.02073	0.60524	0.14708	0.94417	668.1	0.00595	0.00579	0.00617	0.00612
668	0.00064483	0.70575	0.25433	0.96785	668	0.00596	0.0058	0.00615	0.00614
667.9	0.07696	0.67061	0.06229	0.88955	667.9	0.00594	0.0058	0.00613	0.00617
667.8	0.14145	0.70112	0.13487	0.91331	667.8	0.00595	0.0058	0.00617	0.00618
667.7	0.1065	0.78156	0.2593	1.02579	667.7	0.00595	0.00582	0.00612	0.00617
667.6	0.14877	0.67795	0.35736	0.88162	667.6	0.00597	0.00583	0.00617	0.0062
667.5	0.13862	0.69505	0.32276	0.92294	667.5	0.00596	0.00583	0.00617	0.00617
667.4	-0.04065	0.6567	0.30111	0.85117	667.4	0.00596	0.00582	0.00618	0.00617
667.3	-0.09268	0.80716	0.36852	0.70695	667.3	0.00598	0.00584	0.00619	0.00619
667.2	-0.09531	0.71837	0.40226	0.69524	667.2	0.00602	0.00583	0.00618	0.00617
667.1	0.03369	0.70176	0.41633	0.72432	667.1	0.00603	0.00584	0.00616	0.00619
667	-0.05454	0.62531	0.5058	0.75057	667	0.00607	0.00586	0.00619	0.0062
666.9	-0.05789	0.5794	0.4662	0.70471	666.9	0.00605	0.00585	0.0062	0.00622
666.8	0.07833	0.6706	0.48534	0.7835	666.8	0.00603	0.00588	0.00623	0.00621
666.7	0.06359	0.58922	0.54379	0.67699	666.7	0.00604	0.00585	0.00621	0.00622
666.6	0.06931	0.63468	0.57702	0.65908	666.6	0.00605	0.00586	0.00619	0.00622
666.5	0.05689	0.55387	0.61946	0.48207	666.5	0.00605	0.00585	0.00619	0.00625
666.4	0.11238	0.57842	0.56287	0.49477	666.4	0.00606	0.00586	0.00623	0.00624
666.3	0.14153	0.61396	0.66195	0.58363	666.3	0.00604	0.00589	0.00621	0.00625
666.2	0.19788	0.71153	0.67556	0.67796	666.2	0.00605	0.0059	0.00623	0.00627
666.1	0.33215	0.79686	0.7293	0.64695	666.1	0.00605	0.00591	0.00624	0.0063
666	0.27065	0.75855	0.75355	0.68168	666	0.00605	0.00591	0.00625	0.00629
665.9	0.36548	0.70922	0.74548	0.69123	665.9	0.00606	0.0059	0.00625	0.0063
665.8	0.3726	0.70685	0.83655	0.73005	665.8	0.00606	0.00592	0.00625	0.00632
665.7	0.30423	0.68596	0.82275	0.78381	665.7	0.00604	0.00593	0.00625	0.00634
665.6	0.48272	0.57324	0.8079	0.76358	665.6	0.00608	0.00597	0.00627	0.00631
665.5	0.48931	0.59596	0.76055	0.64567	665.5	0.00604	0.00598	0.00632	0.00631
665.4	0.56521	0.61643	0.80862	0.60616	665.4	0.00602	0.00602	0.00635	0.0063
665.3	0.46892	0.61202	0.89823	0.5781	665.3	0.00605	0.00601	0.00634	0.00628
665.2	0.3482	0.43432	0.8946	0.65619	665.2	0.00604	0.00602	0.00634	0.00628
665.1	0.40894	0.49296	0.80199	0.63577	665.1	0.00606	0.00606	0.00636	0.00632
665	0.48041	0.47287	0.65866	0.62449	665	0.00606	0.00607	0.00637	0.0063
664.9	0.44728	0.52056	0.63869	0.4737	664.9	0.00611	0.00605	0.00635	0.00631
664.8	0.57603	0.51576	0.54035	0.5816	664.8	0.00608	0.00606	0.00634	0.00632
664.7	0.58178	0.53829	0.5024	0.75489	664.7	0.00609	0.00606	0.00635	0.00634
664.6	0.52125	0.50927	0.45695	0.74449	664.6	0.00607	0.00608	0.00639	0.00633
664.5	0.51937	0.57145	0.60878	0.73049	664.5	0.00609	0.00609	0.0064	0.00633
664.4	0.55498	0.62915	0.64142	0.73338	664.4	0.00608	0.00613	0.0064	0.00636
664.3	0.73827	0.63184	0.71517	0.68568	664.3	0.00613	0.00616	0.00644	0.00635
664.2	0.70869	0.77621	0.71271	0.69748	664.2	0.00612	0.00618	0.00644	0.00632
664.1	0.74376	0.67027	0.71972	0.628	664.1	0.00614	0.00621	0.00642	0.00633
664	0.80433	0.70606	0.85141	0.7299	664	0.00613	0.00622	0.00641	0.00633
663.9	0.94536	0.52833	0.73216	0.70391	663.9	0.00613	0.00624	0.00639	0.00632
663.8	0.86795	0.42139	0.7223	0.73993	663.8	0.00613	0.00624	0.00638	0.00631
663.7	0.84799	0.45069	0.74838	0.67053	663.7	0.00613	0.00623	0.00637	0.00634
663.6	0.96738	0.42373	0.75452	0.60516	663.6	0.00612	0.00625	0.0064	0.00635
663.5	0.93378	0.42263	0.80645	0.6335	663.5	0.00612	0.00629	0.00636	0.00633
663.4	0.81568	0.35644	0.76901	0.63526	663.4	0.00616	0.00626	0.00633	0.00631
663.3	0.95505	0.2807	0.7822	0.55395	663.3	0.00617	0.00626	0.00636	0.00633
663.2	0.92058	0.27505	0.72179	0.4825	663.2	0.00616	0.00627	0.00639	0.00637
663.1	0.96618	0.22038	0.56614	0.503	663.1	0.00614	0.00629	0.00642	0.00639
663	0.9411	0.22187	0.61338	0.31469	663	0.00616	0.00629	0.00643	0.0064
662.9	1.01588	0.26856	0.61263	0.32522	662.9	0.00616	0.00626	0.00645	0.00639
662.8	1.05982	0.20922	0.68317	0.22898	662.8	0.00616	0.00626	0.00644	0.00642
662.7	1.06451	0.18144	0.55225	0.26401	662.7	0.00618	0.00627	0.00644	0.00643
662.6	1.10293	0.26172	0.53019	0.40293	662.6	0.00623	0.00628	0.00643	0.00646
662.5	1.0286	0.21766	0.75406	0.46307	662.5	0.00621	0.00629	0.00645	0.00644
662.4	0.98145	0.28098	0.75786	0.35222	662.4	0.00624	0.0063	0.00645	0.00644
662.3	1.01988	0.33011	0.59903	0.34029	662.3	0.00626	0.00628	0.00648	0.00644
662.2	0.93585	0.46427	0.5649	0.44412	662.2	0.00627	0.00629	0.00651	0.00647
662.1	1.03733	0.49192	0.53938	0.48361	662.1	0.00628	0.00629	0.00652	0.0065
662	1.08772	0.39528	0.5377	0.60017	662	0.00628	0.00628	0.00651	0.00652
661.9	1.24993	0.36964	0.47616	0.6196	661.9	0.0063	0.00629	0.00654	0.00651
661.8	1.28381	0.4412	0.40838	0.63118	661.8	0.00635	0.0063	0.00657	0.00651
661.7	1.29205	0.37902	0.4432	0.71164	661.7	0.00637	0.00631	0.00659	0.00651
661.6	1.16906	0.38638	0.41983	0.84981	661.6	0.00638	0.00632	0.0066	0.00655
661.5	1.21899	0.37458	0.4472	0.80664	661.5	0.0064	0.00638	0.00661	0.00655
661.4	1.10125	0.2919	0.44653	0.88015	661.4	0.00639	0.00639	0.00662	0.00657
661.3	1.07636	0.25412	0.41706	0.86035	661.3	0.00641	0.00638	0.00662	0.00658
661.2	1.04736	0.2359	0.46241	0.96196	661.2	0.00645	0.00639	0.00663	0.00661
661.1	1.00864	0.37434	0.48583	1.05661	661.1	0.00645	0.00636	0.00665	0.00662
661	0.9718	0.3306	0.42342	1.20367	661	0.00647	0.00634	0.00664	0.0066
660.9	0.98841	0.30102	0.38527	1.34653	660.9	0.00645	0.00632	0.00665	0.00664
660.8	1.03839	0.34418	0.25774	1.43185	660.8	0.00648	0.00635	0.00667	0.00668
660.7	1.10589	0.25734	0.24066	1.33953	660.7	0.00648	0.00634	0.00669	0.00672
660.6	1.02759	0.23809	0.2859	1.31117	660.6	0.00645	0.00634	0.00674	0.00678
660.5	1.0178	0.38167	0.20457	1.26001	660.5	0.0065	0.00636	0.00676	0.0068
660.4	1.00091	0.3556	0.27899	1.31093	660.4	0.0065	0.00635	0.00677	0.00679
660.3	0.8653	0.35604	0.39544	1.18623	660.3	0.00646	0.00636	0.00675	0.00676
660.2	0.85126	0.57046	0.35402	1.26122	660.2	0.00649	0.00634	0.00677	0.00682
660.1	0.89136	0.56123	0.33126	1.26798	660.1	0.00649	0.00635	0.00682	0.00683
660	0.79178	0.53051	0.32116	1.46748	660	0.00647	0.00636	0.00684	0.00686
659.9	0.70518	0.55563	0.33843	1.49902	659.9	0.0065	0.00638	0.00685	0.00689
659.8	0.68272	0.69773	0.4701	1.73818	659.8	0.00649	0.00635	0.00685	0.00687
659.7	0.64496	0.81485	0.52998	1.8023	659.7	0.00651	0.00634	0.00684	0.00692
659.6	0.65119	0.78504	0.63907	1.93876	659.6	0.00652	0.00635	0.00684	0.00691
659.5	0.53423	0.76988	0.67183	1.9618	659.5	0.00653	0.00637	0.00685	0.00689
659.4	0.37093	0.75073	0.8132	1.88481	659.4	0.00652	0.00637	0.00686	0.00691
659.3	0.26982	0.72709	0.73607	1.72326	659.3	0.00651	0.00636	0.00689	0.00689
659.2	0.32431	0.83031	0.63752	1.70986	659.2	0.0065	0.00637	0.0069	0.00688
659.1	0.47174	0.83369	0.67113	1.91041	659.1	0.0065	0.00638	0.00689	0.00688
659	0.46666	0.96593	0.70009	1.87804	659	0.00651	0.00638	0.0069	0.00687
658.9	0.46206	0.95697	0.81618	1.81453	658.9	0.00654	0.00637	0.00691	0.00687
658.8	0.29244	1.00108	0.93846	1.7658	658.8	0.00655	0.00637	0.00687	0.00688
658.7	0.22119	0.94864	0.89337	1.71856	658.7	0.00656	0.00639	0.00688	0.00692
658.6	0.16656	1.09336	0.83918	1.56912	658.6	0.00656	0.0064	0.00685	0.00695
658.5	0.18989	1.07148	1.02387	1.50565	658.5	0.00654	0.00641	0.00683	0.00697
658.4	0.19957	0.98223	1.05868	1.52104	658.4	0.00653	0.00641	0.0068	0.00696
658.3	0.31135	1.06444	1.17246	1.55758	658.3	0.00654	0.00641	0.00678	0.00695
658.2	0.24578	1.02605	1.09101	1.60923	658.2	0.00655	0.0064	0.00681	0.00696
658.1	0.32602	1.10854	1.05902	1.6744	658.1	0.00658	0.00638	0.00684	0.00694
658	0.38124	1.15512	1.12787	1.70499	658	0.0066	0.00639	0.00684	0.00697
657.9	0.40654	0.98721	1.04653	1.62808	657.9	0.00663	0.00638	0.00686	0.00697
657.8	0.38151	0.94918	0.93397	1.63778	657.8	0.00665	0.00639	0.00687	0.00695
657.7	0.28733	0.95763	0.94743	1.59534	657.7	0.00665	0.00641	0.00688	0.00697
657.6	0.19374	0.90369	1.17892	1.49683	657.6	0.00664	0.00643	0.0069	0.00697
657.5	0.14834	0.8407	1.27354	1.55964	657.5	0.00665	0.00641	0.0069	0.00697
657.4	0.0654	0.91842	1.39752	1.48199	657.4	0.00667	0.00643	0.00691	0.00694
657.3	0.06879	0.90268	1.37595	1.54514	657.3	0.00668	0.00643	0.00689	0.00693
657.2	0.12097	0.88806	1.40927	1.52779	657.2	0.00668	0.00643	0.00693	0.00691
657.1	0.09158	0.97375	1.30357	1.59975	657.1	0.00672	0.00645	0.00693	0.00695
657	-0.12811	0.77489	1.17513	1.68152	657	0.00675	0.00648	0.00697	0.00698
656.9	-0.04628	0.87036	1.08943	1.54728	656.9	0.00675	0.00649	0.00697	0.00699
656.8	-0.10891	0.93679	1.23367	1.60168	656.8	0.00678	0.00651	0.00698	0.00696
656.7	-0.1118	0.99917	1.23543	1.5621	656.7	0.00682	0.00654	0.00695	0.007
656.6	-0.11497	0.98417	1.15666	1.66391	656.6	0.00683	0.00657	0.00698	0.00699
656.5	-0.10175	0.96531	1.03275	1.57528	656.5	0.00683	0.00659	0.00701	0.00703
656.4	-0.25394	0.91731	0.96319	1.4722	656.4	0.00682	0.00659	0.00701	0.00703
656.3	-0.26067	0.91576	0.90952	1.38497	656.3	0.00683	0.00663	0.00705	0.00708
656.2	-0.1804	0.92387	0.91411	1.46555	656.2	0.00684	0.00662	0.00703	0.00711
656.1	-0.12463	0.99139	0.73368	1.45863	656.1	0.00687	0.00664	0.00705	0.00709
656	-0.03718	0.99687	0.73996	1.50069	656	0.00686	0.00665	0.00705	0.00711
655.9	-0.13922	0.98964	0.76244	1.3878	655.9	0.0069	0.00668	0.00706	0.00711
655.8	-0.30472	0.96344	0.7524	1.2707	655.8	0.00692	0.00668	0.00708	0.00717
655.7	-0.17897	0.71718	0.68136	1.25098	655.7	0.00691	0.0067	0.00709	0.00716
655.6	-0.20305	0.70205	0.69875	1.22927	655.6	0.0069	0.00671	0.00713	0.00715
655.5	-0.04011	0.65625	0.65077	1.20407	655.5	0.00691	0.00672	0.00716	0.00719
655.4	-0.15959	0.67158	0.78761	1.26919	655.4	0.00691	0.00674	0.00718	0.00723
655.3	-0.12037	0.5291	0.64435	1.27245	655.3	0.00694	0.00673	0.0072	0.00725
655.2	-0.16531	0.6847	0.32897	1.31351	655.2	0.00694	0.0067	0.00721	0.00727
655.1	-0.10504	0.84005	0.24674	1.12867	655.1	0.00692	0.0067	0.00727	0.00729
655	-0.27322	0.91961	0.25932	1.12018	655	0.00695	0.00673	0.00727	0.0073
654.9	-0.11497	0.91032	0.32756	1.13876	654.9	0.00695	0.00675	0.00727	0.00729
654.8	-0.15288	1.03853	0.39788	0.96949	654.8	0.00694	0.00677	0.00729	0.00731
654.7	-0.28948	1.09304	0.32515	1.00594	654.7	0.00696	0.00678	0.00731	0.0073
654.6	-0.27893	1.01402	0.28543	1.02704	654.6	0.00694	0.00679	0.00731	0.00733
654.5	-0.16831	0.81866	0.41087	1.03814	654.5	0.00692	0.0068	0.0073	0.00736
654.4	-0.17383	0.70865	0.30177	0.87576	654.4	0.00697	0.0068	0.0073	0.00738
654.3	-0.24644	0.84293	0.27544	0.85977	654.3	0.00698	0.00682	0.00733	0.00739
654.2	-0.0824	0.92685	0.19936	0.84646	654.2	0.00696	0.00683	0.00734	0.0074
654.1	-0.03925	0.99824	0.16107	0.73423	654.1	0.00697	0.00684	0.00735	0.00744
654	0.02029	0.92262	0.03247	0.7445	654	0.007	0.00685	0.00732	0.00749
653.9	-0.02869	0.92211	-0.11561	0.86599	653.9	0.00699	0.00687	0.00729	0.00749
653.8	0.11261	0.9963	0.08644	1.08026	653.8	0.00697	0.00688	0.0073	0.00749
653.7	0.23171	1.07427	0.19801	1.06335	653.7	0.00698	0.0069	0.00731	0.00752
653.6	0.17319	0.98952	0.24184	1.02353	653.6	0.00703	0.0069	0.00733	0.00755
653.5	0.1769	1.04588	0.08106	1.04882	653.5	0.00703	0.00692	0.00733	0.00756
653.4	0.26137	1.16407	0.04936	0.93612	653.4	0.00701	0.00691	0.00734	0.00755
653.3	0.38885	1.2008	0.03236	0.99924	653.3	0.00703	0.00692	0.00733	0.00755
653.2	0.37198	1.22279	0.01342	1.06114	653.2	0.00706	0.00693	0.00734	0.00752
653.1	0.41475	1.16711	0.09511	1.05038	653.1	0.00708	0.0069	0.00734	0.00752
653	0.53565	1.09523	0.08911	1.24012	653	0.0071	0.00692	0.00733	0.00752
652.9	0.50072	1.07987	0.04415	1.27558	652.9	0.0071	0.00692	0.00734	0.00753
652.8	0.50882	1.11524	-0.01141	1.20553	652.8	0.00714	0.00694	0.00734	0.00755
652.7	0.42497	1.15991	-0.07205	1.32827	652.7	0.00716	0.00695	0.00736	0.00754
652.6	0.43093	1.16269	-0.05129	1.35302	652.6	0.00715	0.00692	0.00739	0.00757
652.5	0.50076	1.21052	-0.02173	1.44822	652.5	0.00712	0.00695	0.00739	0.00755
652.4	0.4682	1.18241	0.02872	1.44901	652.4	0.00714	0.00695	0.00739	0.00758
652.3	0.48688	1.15625	-0.05565	1.5397	652.3	0.00717	0.00694	0.00736	0.00756
652.2	0.36269	1.22729	-0.29736	1.59099	652.2	0.00716	0.00695	0.00736	0.00751
652.1	0.3746	1.19733	-0.33458	1.55135	652.1	0.00717	0.00694	0.00737	0.00748
652	0.35798	1.34894	-0.36771	1.64375	652	0.0072	0.00697	0.0074	0.00746
651.9	0.4292	1.28482	-0.11951	1.574	651.9	0.00723	0.00699	0.0074	0.00746
651.8	0.3517	1.07763	-0.10873	1.69234	651.8	0.00726	0.00702	0.00739	0.00746
651.7	0.44655	1.03467	-0.19708	1.71308	651.7	0.00726	0.00702	0.00739	0.00749
651.6	0.4269	1.04257	-0.12539	1.72164	651.6	0.00726	0.00705	0.00739	0.00753
651.5	0.52764	1.07137	-0.17468	1.8018	651.5	0.00727	0.00708	0.00742	0.00755
651.4	0.76001	1.01176	-0.2261	1.9403	651.4	0.00728	0.00708	0.00742	0.00758
651.3	0.83958	1.13893	-0.03307	1.94001	651.3	0.00731	0.0071	0.00741	0.00759
651.2	0.77205	1.21523	-0.09239	1.88625	651.2	0.00737	0.00712	0.0074	0.00759
651.1	0.86354	1.42302	-0.08312	1.8982	651.1	0.00739	0.00716	0.00745	0.00757
651	0.8246	1.34263	-0.08993	1.96432	651	0.00738	0.00717	0.00747	0.00758
650.9	0.78011	1.23358	-0.03579	2.06113	650.9	0.00742	0.00719	0.00748	0.00757
650.8	0.70486	1.25276	-0.1077	2.10375	650.8	0.00747	0.0072	0.00748	0.00756
650.7	0.7781	1.20782	-0.04126	2.1065	650.7	0.00748	0.00719	0.00754	0.00754
650.6	0.86622	1.21938	0.03802	1.91003	650.6	0.00749	0.00718	0.00756	0.00757
650.5	0.79749	1.135	0.02077	1.82046	650.5	0.00753	0.00718	0.00757	0.0076
650.4	0.71703	1.20789	0.01337	1.86768	650.4	0.00753	0.00719	0.00757	0.0076
650.3	0.74144	1.13051	-0.11036	1.84238	650.3	0.00751	0.0072	0.00754	0.00759
650.2	0.84081	1.14317	-0.09821	1.85811	650.2	0.00753	0.00719	0.00756	0.00758
650.1	0.73992	1.0778	-0.09318	1.80198	650.1	0.00757	0.0072	0.00757	0.00758
650	0.61206	1.03313	-0.01327	1.84691	650	0.00758	0.00722	0.00762	0.0076
649.9	0.6583	0.92166	-0.05105	1.85202	649.9	0.00755	0.00721	0.00763	0.00764
649.8	0.69195	1.02623	-0.13865	1.91282	649.8	0.00754	0.00726	0.00767	0.00766
649.7	0.57228	0.92426	-0.09079	1.76331	649.7	0.00753	0.00725	0.0077	0.00767
649.6	0.64955	0.95367	-0.06619	1.78329	649.6	0.00754	0.00729	0.00772	0.0077
649.5	0.67489	0.94607	0.13049	1.78329	649.5	0.00753	0.00727	0.00773	0.00769
649.4	0.78072	0.91553	0.16559	1.91506	649.4	0.00754	0.00729	0.00774	0.00771
649.3	0.73516	0.70294	0.15125	1.7551	649.3	0.00758	0.00733	0.00773	0.00773
649.2	0.68326	0.60034	0.2031	1.68554	649.2	0.00764	0.00733	0.00775	0.00775
649.1	0.82808	0.7902	0.22337	1.83837	649.1	0.00767	0.00736	0.00778	0.00777
649	0.77344	0.81524	0.19734	1.82378	649	0.00764	0.00738	0.0078	0.00782
648.9	0.76677	0.88578	0.41394	1.76547	648.9	0.00768	0.0074	0.00782	0.00783
648.8	0.74047	1.04768	0.55199	1.72523	648.8	0.0077	0.00741	0.00784	0.00787
648.7	0.83534	0.96594	0.7329	1.76385	648.7	0.00771	0.0074	0.00783	0.00791
648.6	0.82789	0.89065	0.70334	1.8192	648.6	0.00772	0.00739	0.00787	0.00791
648.5	0.90313	1.01823	0.67658	1.76208	648.5	0.00774	0.00741	0.00789	0.00791
648.4	0.7428	0.97352	0.59746	1.71904	648.4	0.00773	0.00743	0.00792	0.00789
648.3	0.68673	1.0631	0.63057	1.82183	648.3	0.00775	0.00744	0.00792	0.0079
648.2	0.65109	1.03729	0.89351	1.60347	648.2	0.00776	0.00743	0.00796	0.00789
648.1	0.52093	1.01239	1.02345	1.52965	648.1	0.00778	0.00743	0.00797	0.00786
648	0.45608	0.9368	1.04563	1.4928	648	0.00782	0.00746	0.00802	0.00785
647.9	0.56652	0.9309	1.1938	1.33205	647.9	0.00779	0.00744	0.00807	0.00787
647.8	0.57117	0.90387	1.10388	1.2128	647.8	0.00781	0.00745	0.00806	0.00789
647.7	0.58094	1.02646	1.12936	1.21388	647.7	0.00782	0.00743	0.00806	0.00796
647.6	0.58054	0.94109	1.14566	1.052	647.6	0.00787	0.00744	0.00805	0.00797
647.5	0.58763	1.14346	1.03637	0.91549	647.5	0.00788	0.00745	0.00809	0.00802
647.4	0.65113	1.03519	1.13808	0.90468	647.4	0.00789	0.00744	0.00811	0.00805
647.3	0.64473	1.0699	1.13223	0.94899	647.3	0.00793	0.00746	0.00814	0.00806
647.2	0.64727	1.09132	0.98289	0.98071	647.2	0.00795	0.00749	0.00818	0.00808
647.1	0.74345	1.32232	1.06271	1.00415	647.1	0.00796	0.00747	0.00819	0.00808
647	0.76969	1.19175	1.04391	1.0283	647	0.00796	0.0075	0.00821	0.00813
646.9	0.65511	1.2786	1.30201	1.00415	646.9	0.00797	0.00757	0.00824	0.00815
646.8	0.54525	1.04574	1.15038	1.10501	646.8	0.00797	0.0076	0.00826	0.00816
646.7	0.5381	1.03436	1.10499	0.98233	646.7	0.00797	0.00755	0.00826	0.0082
646.6	0.55758	0.9814	1.26431	0.75257	646.6	0.00801	0.0076	0.00825	0.0082
646.5	0.55965	0.95078	1.26055	0.82257	646.5	0.00804	0.00756	0.00825	0.00821
646.4	0.54528	1.03012	1.38384	0.85048	646.4	0.00805	0.00757	0.00825	0.00818
646.3	0.62355	0.95247	1.31833	0.86864	646.3	0.00808	0.00758	0.00828	0.00817
646.2	0.55433	0.9016	1.38024	0.84419	646.2	0.0081	0.00759	0.00828	0.00818
646.1	0.51848	0.97069	1.31213	0.74286	646.1	0.00809	0.00762	0.00829	0.0082
646	0.47009	0.94587	1.378	0.6023	646	0.00808	0.00763	0.0083	0.00821
645.9	0.43532	1.13236	1.26367	0.65047	645.9	0.0081	0.00763	0.0083	0.00827
645.8	0.37037	1.04602	1.26499	0.72604	645.8	0.00808	0.00763	0.00829	0.0083
645.7	0.23068	1.08497	1.29297	0.71078	645.7	0.00812	0.00766	0.00831	0.0083
645.6	0.31257	0.93196	1.26307	0.82534	645.6	0.00812	0.00765	0.00832	0.00832
645.5	0.43279	0.70052	1.1468	0.66362	645.5	0.00816	0.00767	0.00836	0.00838
645.4	0.4571	0.63167	1.03409	0.51381	645.4	0.00816	0.0077	0.00838	0.00835
645.3	0.39477	0.82031	1.12955	0.57729	645.3	0.00814	0.00771	0.00838	0.00838
645.2	0.29405	0.86577	1.00375	0.59267	645.2	0.00814	0.0077	0.00838	0.00842
645.1	0.33005	0.83645	0.86594	0.68634	645.1	0.00813	0.00768	0.00837	0.00844
645	0.37763	0.78711	0.87483	0.66051	645	0.00816	0.00767	0.00839	0.0085
644.9	0.33514	0.72482	0.87443	0.55636	644.9	0.00818	0.00768	0.00841	0.00853
644.8	0.34374	0.63226	0.71555	0.67563	644.8	0.00822	0.00768	0.0084	0.00857
644.7	0.24656	0.66062	0.5914	0.48887	644.7	0.00821	0.00771	0.00839	0.00862
644.6	0.21207	0.66169	0.61926	0.49838	644.6	0.00822	0.00773	0.00837	0.00866
644.5	0.20263	0.63835	0.47546	0.55874	644.5	0.00824	0.00777	0.00835	0.00866
644.4	0.12764	0.54836	0.50813	0.67021	644.4	0.00824	0.00779	0.00834	0.00867
644.3	0.17182	0.48491	0.34905	0.74643	644.3	0.00821	0.00781	0.00835	0.00866
644.2	0.2012	0.41008	0.31891	0.7792	644.2	0.0082	0.00782	0.00835	0.0087
644.1	0.3365	0.3458	0.32846	0.8535	644.1	0.0082	0.00784	0.0083	0.00871
644	0.16849	0.33838	0.2704	0.8851	644	0.00818	0.00784	0.00832	0.00871
643.9	0.04489	0.358	0.39638	0.96303	643.9	0.00817	0.00785	0.00829	0.00871
643.8	-0.05577	0.25585	0.51899	0.77022	643.8	0.00819	0.00786	0.00831	0.00872
643.7	0.06019	0.23827	0.5408	0.59976	643.7	0.00821	0.00786	0.0083	0.00873
643.6	0.0703	0.2256	0.35579	0.54898	643.6	0.00826	0.00786	0.00833	0.00873
643.5	0.15999	0.28353	0.46155	0.38986	643.5	0.00824	0.00784	0.00832	0.00874
643.4	0.21937	0.21002	0.49719	0.54043	643.4	0.00826	0.00786	0.00834	0.00872
643.3	0.41405	0.27135	0.25535	0.64479	643.3	0.00826	0.00789	0.00834	0.00871
643.2	0.40425	0.24106	0.37878	0.64676	643.2	0.00826	0.00791	0.00841	0.00873
643.1	0.35974	0.20403	0.26936	0.49149	643.1	0.00829	0.00795	0.00842	0.00875
643	0.4287	0.18652	0.18038	0.50856	643	0.0083	0.00795	0.00845	0.0088
642.9	0.2775	0.19812	0.19494	0.50245	642.9	0.00832	0.00795	0.00844	0.0088
642.8	0.29976	0.2466	0.20144	0.63228	642.8	0.00832	0.00797	0.00845	0.0088
642.7	0.38829	0.12651	0.10442	0.82866	642.7	0.00837	0.00797	0.0085	0.00885
642.6	0.49244	0.09907	0.15924	0.79944	642.6	0.00837	0.00803	0.00852	0.00884
642.5	0.46111	0.06427	0.32094	0.95194	642.5	0.00838	0.00803	0.00857	0.00886
642.4	0.40976	0.05973	0.37961	0.70825	642.4	0.00839	0.00803	0.00856	0.00885
642.3	0.41397	0.03507	0.45987	0.77576	642.3	0.00839	0.00803	0.00859	0.00886
642.2	0.30106	0.16464	0.53656	0.74164	642.2	0.00839	0.00805	0.00857	0.00885
642.1	0.28289	0.15174	0.64961	0.67479	642.1	0.0084	0.00807	0.00859	0.00885
642	0.2228	0.21231	0.41279	0.54022	642	0.00843	0.0081	0.00857	0.00891
641.9	0.13462	0.09355	0.46152	0.68682	641.9	0.00842	0.00815	0.00863	0.00889
641.8	-0.02514	0.11326	0.62506	0.68751	641.8	0.00845	0.00817	0.00865	0.00889
641.7	0.00931	0.0521	0.87895	0.68843	641.7	0.00844	0.00819	0.00866	0.00887
641.6	-0.01512	0.12956	0.72202	0.83767	641.6	0.00849	0.00819	0.00868	0.00886
641.5	-0.03913	0.14158	0.73617	0.82011	641.5	0.0085	0.00823	0.00871	0.00891
641.4	-0.06857	0.22744	0.82161	0.93749	641.4	0.00853	0.00824	0.00874	0.00889
641.3	-0.03936	0.10272	0.84358	0.77088	641.3	0.00854	0.00823	0.00875	0.0089
641.2	-0.15285	0.01584	0.90008	1.00564	641.2	0.00859	0.00824	0.00876	0.00888
641.1	0.02603	0.04255	0.89025	1.0181	641.1	0.00861	0.00825	0.00881	0.00886
641	-0.14573	0.10179	1.1111	1.03786	641	0.00865	0.00825	0.00883	0.00889
640.9	-0.22916	0.12892	1.1323	1.13074	640.9	0.00868	0.00826	0.00885	0.00892
640.8	-0.20352	0.12457	1.19215	1.14278	640.8	0.00868	0.00831	0.00888	0.00891
640.7	-0.29455	0.14317	1.11746	1.23023	640.7	0.00869	0.00832	0.00888	0.00892
640.6	-0.20583	0.22606	0.95639	1.14456	640.6	0.00872	0.00833	0.00892	0.00894
640.5	-0.25652	0.30073	0.90946	1.26079	640.5	0.00872	0.00834	0.00891	0.00896
640.4	-0.23782	0.34346	0.82801	1.48502	640.4	0.00872	0.00835	0.00891	0.00896
640.3	-0.3572	0.35246	0.85324	1.56338	640.3	0.00873	0.00837	0.00893	0.00897
640.2	-0.3921	0.28866	0.62597	1.38832	640.2	0.00876	0.00839	0.00895	0.00896
640.1	-0.32595	0.44094	0.60428	1.28471	640.1	0.00877	0.00839	0.00896	0.00898
640	-0.35165	0.47856	0.56256	1.17394	640	0.00877	0.00838	0.00901	0.00901
639.9	-0.43148	0.64127	0.48291	1.25847	639.9	0.00876	0.00841	0.00901	0.00901
639.8	-0.36081	0.62335	0.52131	1.47182	639.8	0.00881	0.00843	0.00901	0.00903
639.7	-0.38917	0.69365	0.97342	1.3341	639.7	0.0088	0.00844	0.00897	0.00904
639.6	-0.39929	0.71052	0.86994	1.35152	639.6	0.0088	0.00846	0.00902	0.00905
639.5	-0.33922	0.76268	0.90818	1.37283	639.5	0.00882	0.00845	0.00905	0.00908
639.4	-0.34877	0.65109	0.83969	1.32147	639.4	0.00881	0.00844	0.00903	0.00909
639.3	-0.29947	0.66996	0.90817	1.49192	639.3	0.00884	0.00847	0.00904	0.00908
639.2	-0.25731	0.74384	0.78371	1.22896	639.2	0.00885	0.00847	0.00904	0.00907
639.1	-0.17106	0.65402	0.77408	1.29608	639.1	0.00887	0.00849	0.00905	0.00907
639	-0.05173	0.78233	0.63714	1.10271	639	0.0089	0.00851	0.00906	0.00907
638.9	0.05442	0.86289	0.50353	1.2159	638.9	0.00892	0.00853	0.00908	0.00906
638.8	0.14831	1.06955	0.4955	1.39368	638.8	0.00898	0.00852	0.00909	0.00911
638.7	0.26575	0.99137	0.51165	1.41511	638.7	0.00898	0.00855	0.00909	0.00911
638.6	0.33866	1.04016	0.38769	1.47592	638.6	0.00899	0.00856	0.0091	0.00912
638.5	0.65194	1.0137	0.54593	1.38282	638.5	0.00903	0.00857	0.00908	0.00916
638.4	0.56281	1.08998	0.42488	1.43309	638.4	0.00902	0.00858	0.0091	0.00919
638.3	0.5546	1.00349	0.40327	1.27096	638.3	0.00899	0.0086	0.00913	0.00922
638.2	0.66832	1.13614	0.63356	1.30768	638.2	0.009	0.00863	0.00914	0.00919
638.1	0.64052	1.12286	0.52163	1.29831	638.1	0.00899	0.00865	0.00913	0.00924
638	0.74766	1.30263	0.52233	1.36955	638	0.00898	0.00869	0.00916	0.00923
637.9	0.84944	1.31345	0.53239	1.40918	637.9	0.009	0.00871	0.00918	0.00928
637.8	0.88526	1.40111	0.49567	1.21214	637.8	0.00899	0.0087	0.00918	0.00931
637.7	1.06175	1.34921	0.52259	1.21006	637.7	0.00902	0.00871	0.00921	0.00931
637.6	0.98779	1.48914	0.55269	1.2581	637.6	0.00902	0.00874	0.0092	0.0093
637.5	0.99513	1.47026	0.51846	1.0985	637.5	0.00904	0.00872	0.00921	0.00934
637.4	0.87546	1.51806	0.5241	1.1929	637.4	0.00905	0.00872	0.00924	0.00938
637.3	0.9559	1.37244	0.77787	1.29411	637.3	0.00905	0.00876	0.00928	0.00939
637.2	0.93209	1.30557	0.68091	1.38568	637.2	0.00909	0.00881	0.00933	0.00942
637.1	0.82955	1.2961	0.7569	1.26774	637.1	0.00912	0.00883	0.00936	0.00943
637	0.98538	1.39137	0.72891	1.22683	637	0.00912	0.00884	0.00937	0.00948
636.9	1.01011	1.39916	0.80088	1.41997	636.9	0.00912	0.00884	0.00939	0.00953
636.8	0.97855	1.28105	0.86716	1.4189	636.8	0.00911	0.00885	0.00941	0.00955
636.7	0.97955	1.30728	1.00331	1.41701	636.7	0.00916	0.00887	0.0094	0.00955
636.6	0.9944	1.20932	1.06321	1.23249	636.6	0.00921	0.00889	0.00943	0.00958
636.5	0.90141	1.3106	1.12446	1.00003	636.5	0.00923	0.00891	0.00942	0.00963
636.4	0.89289	1.3051	0.72269	1.07787	636.4	0.00925	0.00892	0.0095	0.00968
636.3	1.07124	1.27892	0.72513	0.90474	636.3	0.00926	0.00895	0.00952	0.00968
636.2	1.06784	1.08973	0.63214	0.70716	636.2	0.00931	0.00897	0.00953	0.0097
636.1	1.0776	0.97339	0.77319	0.66304	636.1	0.00932	0.00899	0.00953	0.00972
636	0.95269	1.03235	0.63576	0.60759	636	0.00929	0.00901	0.00955	0.00973
635.9	0.85944	0.98674	0.60145	0.6737	635.9	0.0093	0.00902	0.00958	0.00977
635.8	0.87881	1.07754	0.66606	0.71056	635.8	0.00929	0.00902	0.00961	0.00979
635.7	0.85429	0.79384	0.76675	0.92108	635.7	0.0093	0.00903	0.00963	0.0098
635.6	0.85644	0.6952	0.8538	0.82054	635.6	0.00933	0.00904	0.00964	0.00983
635.5	0.725	0.57987	0.74935	0.8309	635.5	0.00933	0.00908	0.00968	0.00982
635.4	0.57254	0.74219	0.78964	0.90656	635.4	0.00937	0.0091	0.00968	0.00985
635.3	0.5596	0.76209	0.58177	0.75981	635.3	0.00939	0.0091	0.00968	0.00987
635.2	0.41857	0.69532	0.43569	0.72997	635.2	0.0094	0.00911	0.00972	0.0099
635.1	0.54439	0.6821	0.48143	0.74553	635.1	0.00944	0.00914	0.00974	0.0099
635	0.52715	0.64868	0.40139	0.66962	635	0.00946	0.00917	0.00972	0.00991
634.9	0.43405	0.5377	0.3017	0.6743	634.9	0.00945	0.00918	0.00974	0.00997
634.8	0.59017	0.58826	0.1983	0.57532	634.8	0.00945	0.00918	0.00975	0.00997
634.7	0.5172	0.51245	0.28422	0.64923	634.7	0.00947	0.00919	0.00976	0.00998
634.6	0.60178	0.44656	0.39268	0.55367	634.6	0.00948	0.00921	0.00979	0.01
634.5	0.67601	0.37978	0.48517	0.73003	634.5	0.0095	0.00924	0.0098	0.00998
634.4	0.3963	0.48241	0.25384	0.53551	634.4	0.0095	0.00927	0.00982	0.01001
634.3	0.48386	0.42761	0.17805	0.56624	634.3	0.00953	0.00925	0.00985	0.01005
634.2	0.49016	0.47349	0.20733	0.69197	634.2	0.00951	0.00927	0.00986	0.01003
634.1	0.6138	0.44933	0.32243	0.62947	634.1	0.00953	0.00929	0.00986	0.01
634	0.62423	0.66354	0.19278	0.53928	634	0.00957	0.0093	0.00984	0.01
633.9	0.61393	0.72089	0.38345	0.29873	633.9	0.00954	0.00929	0.00985	0.01003
633.8	0.71643	0.80055	0.19053	0.45871	633.8	0.00953	0.0093	0.00988	0.01002
633.7	0.63611	0.6665	0.34415	0.47527	633.7	0.00957	0.00931	0.00992	0.01002
633.6	0.61736	0.74468	0.45467	0.52615	633.6	0.00957	0.00932	0.00992	0.01003
633.5	0.57533	0.65834	0.32251	0.66842	633.5	0.00963	0.00934	0.0099	0.01006
633.4	0.51612	0.58201	0.29189	0.68538	633.4	0.00965	0.00937	0.00992	0.0101
633.3	0.58067	0.62234	0.31393	0.75021	633.3	0.00962	0.00937	0.00992	0.01014
633.2	0.65261	0.64079	0.12853	0.85986	633.2	0.00962	0.00936	0.00995	0.01011
633.1	0.5474	0.70353	0.29607	0.86439	633.1	0.00963	0.00936	0.00993	0.01011
633	0.55773	0.72368	0.20966	1.00722	633	0.00963	0.00937	0.00994	0.01013
632.9	0.39289	0.74922	0.30871	1.28575	632.9	0.00964	0.00937	0.00992	0.01017
632.8	0.3766	0.89665	0.31457	1.39128	632.8	0.00967	0.00936	0.00998	0.01017
632.7	0.47506	0.96347	0.41688	1.53833	632.7	0.00968	0.00935	0.00996	0.0102
632.6	0.58459	1.13492	0.49737	1.45639	632.6	0.00969	0.00938	0.00998	0.01019
632.5	0.61198	1.20362	0.33631	1.45935	632.5	0.00975	0.00941	0.00997	0.01024
632.4	0.49445	1.37792	0.11452	1.36242	632.4	0.0098	0.00944	0.00999	0.01028
632.3	0.42046	1.32787	0.17984	1.22919	632.3	0.00983	0.00945	0.00999	0.01026
632.2	0.34637	1.30902	0.25411	1.26824	632.2	0.00984	0.00943	0.01	0.01027
632.1	0.59296	1.31598	0.2937	1.38533	632.1	0.00986	0.00941	0.01002	0.01028
632	0.59258	1.24675	0.46205	1.5706	632	0.00989	0.00944	0.01009	0.0103
631.9	0.83146	1.05467	0.54402	1.58046	631.9	0.0099	0.00946	0.01011	0.01032
631.8	0.76777	1.05825	0.61637	1.57573	631.8	0.00993	0.00946	0.01015	0.01034
631.7	0.72049	1.13128	0.77748	1.59265	631.7	0.00995	0.00946	0.01018	0.01036
631.6	0.76436	1.12894	0.80319	1.55305	631.6	0.00998	0.00944	0.0102	0.01038
631.5	0.63716	1.16721	0.84531	1.53533	631.5	0.01004	0.00943	0.0102	0.01041
631.4	0.471	1.20374	0.75151	1.64784	631.4	0.01005	0.00943	0.01024	0.01044
631.3	0.33845	1.34434	0.6234	1.49114	631.3	0.01008	0.00943	0.01024	0.01046
631.2	0.29719	1.35022	0.65749	1.27981	631.2	0.01006	0.00945	0.01022	0.0105
631.1	0.1191	1.27794	0.81829	1.15396	631.1	0.01015	0.00945	0.01025	0.01052
631	0.10767	1.31701	0.95525	1.25076	631	0.01014	0.00947	0.01027	0.01056
630.9	-0.01811	1.45527	1.09119	1.23759	630.9	0.01017	0.00951	0.01032	0.01054
630.8	0.05101	1.33264	1.00927	1.18126	630.8	0.01021	0.00953	0.01033	0.01057
630.7	0.05795	1.34872	0.99159	1.21408	630.7	0.01022	0.00955	0.01036	0.01061
630.6	0.0198	1.29931	0.91973	1.24487	630.6	0.01022	0.00956	0.01036	0.0106
630.5	0.05826	1.14565	0.70157	1.40538	630.5	0.01025	0.00956	0.01039	0.01063
630.4	0.05426	0.95679	0.8005	1.3022	630.4	0.01028	0.00956	0.01038	0.01066
630.3	0.11703	0.88465	0.90893	1.24297	630.3	0.0103	0.00959	0.01038	0.01068
630.2	0.30255	0.87625	0.95567	1.08799	630.2	0.01031	0.00961	0.01036	0.01069
630.1	0.2421	0.86874	1.01007	0.9994	630.1	0.01032	0.00963	0.0104	0.01069
630	0.25663	0.84909	1.15269	1.0108	630	0.01038	0.00964	0.01042	0.0107
629.9	0.16668	1.01704	1.20928	1.07133	629.9	0.01042	0.00967	0.01042	0.01073
629.8	0.25156	0.77103	1.18613	0.90436	629.8	0.01044	0.0097	0.01046	0.01074
629.7	0.31481	0.63052	1.26806	0.91826	629.7	0.01046	0.0097	0.0105	0.01075
629.6	0.31149	0.64726	1.32124	0.82146	629.6	0.01047	0.00973	0.0105	0.01072
629.5	0.42862	0.52531	1.34844	0.71655	629.5	0.0105	0.00979	0.01053	0.01074
629.4	0.50005	0.56301	1.37517	0.48695	629.4	0.01049	0.00982	0.01056	0.01075
629.3	0.47423	0.45681	1.2417	0.7686	629.3	0.01053	0.00983	0.01059	0.01077
629.2	0.4041	0.27949	1.23721	0.9668	629.2	0.01054	0.00986	0.0106	0.01079
629.1	0.34907	0.14205	1.19083	0.78184	629.1	0.01056	0.00986	0.01062	0.0108
629	0.52293	0.15942	1.12942	0.83606	629	0.01056	0.00989	0.01065	0.01082
628.9	0.5876	0.29308	1.01173	0.74342	628.9	0.01057	0.00991	0.01065	0.01086
628.8	0.48506	0.35392	0.79157	0.69371	628.8	0.01058	0.00999	0.01069	0.0109
628.7	0.40576	0.36438	0.61307	0.58635	628.7	0.01058	0.01001	0.01071	0.01095
628.6	0.29885	0.46257	0.48204	0.4662	628.6	0.01059	0.01001	0.01073	0.01095
628.5	0.23465	0.52614	0.47107	0.43219	628.5	0.01058	0.01004	0.01073	0.01094
628.4	0.31722	0.59766	0.5953	0.12004	628.4	0.01059	0.01004	0.01072	0.01099
628.3	0.33578	0.77397	0.51003	0.07172	628.3	0.01061	0.01006	0.01074	0.01101
628.2	0.35197	0.56258	0.45645	0.33824	628.2	0.01058	0.01008	0.01078	0.01101
628.1	0.44248	0.4588	0.42391	0.55282	628.1	0.01063	0.01013	0.01077	0.01103
628	0.63278	0.58737	0.46018	0.66745	628	0.01065	0.01014	0.01077	0.01103
627.9	0.67933	0.57078	0.43345	0.68381	627.9	0.01072	0.01016	0.01083	0.01103
627.8	0.84512	0.71713	0.33561	0.88538	627.8	0.01073	0.01019	0.01086	0.01106
627.7	0.94272	0.58456	0.23015	0.92259	627.7	0.01072	0.01021	0.01087	0.01106
627.6	1.14206	0.40485	0.17051	0.84028	627.6	0.01075	0.0102	0.01084	0.01109
627.5	0.99203	0.50043	0.17109	0.81919	627.5	0.01079	0.01022	0.01085	0.01113
627.4	0.93292	0.46355	0.22543	0.80593	627.4	0.01083	0.01023	0.01085	0.01114
627.3	0.84824	0.36915	0.36782	1.05727	627.3	0.01085	0.01026	0.01087	0.01123
627.2	0.94649	0.37315	0.52562	0.87696	627.2	0.01089	0.01032	0.01091	0.01129
627.1	0.81909	0.36829	0.68887	1.0308	627.1	0.0109	0.01031	0.01091	0.0113
627	0.66917	0.45032	0.61218	1.22341	627	0.01094	0.01034	0.01095	0.01134
626.9	0.67768	0.46181	0.70783	1.11754	626.9	0.01094	0.01034	0.011	0.01137
626.8	0.57858	0.47481	0.75169	0.91956	626.8	0.01097	0.01036	0.011	0.01139
626.7	0.65964	0.28022	0.66917	1.03978	626.7	0.01096	0.01035	0.01103	0.01142
626.6	0.61445	0.3207	0.78596	1.13537	626.6	0.01101	0.01038	0.01106	0.01141
626.5	0.48533	0.32779	0.87869	1.15017	626.5	0.01098	0.01043	0.01107	0.01144
626.4	0.37538	0.5123	0.68114	1.10298	626.4	0.01098	0.01047	0.01106	0.01145
626.3	0.49031	0.46506	0.4973	0.9665	626.3	0.01101	0.01047	0.01109	0.01148
626.2	0.49205	0.51557	0.4776	0.96046	626.2	0.01104	0.01044	0.01112	0.01152
626.1	0.3385	0.64688	0.49637	0.99875	626.1	0.01108	0.01047	0.01112	0.01155
626	0.55138	0.67589	0.54868	0.83757	626	0.01109	0.01051	0.01116	0.01155
625.9	0.50193	0.81604	0.47668	0.89117	625.9	0.01114	0.01048	0.01117	0.01158
625.8	0.63302	0.82859	0.82812	0.9477	625.8	0.01114	0.01049	0.01118	0.01161
625.7	0.55135	0.94574	1.03349	1.03507	625.7	0.01115	0.01048	0.0112	0.01163
625.6	0.55386	0.88451	1.0532	1.05696	625.6	0.01117	0.01047	0.01122	0.01165
625.5	0.5523	0.82021	1.14269	1.09655	625.5	0.01125	0.01049	0.01123	0.01164
625.4	0.50853	0.71228	1.14257	1.27081	625.4	0.01129	0.01051	0.01124	0.0116
625.3	0.55427	0.823	1.19229	1.53206	625.3	0.0113	0.01054	0.01126	0.01166
625.2	0.55783	0.77134	1.28491	1.52166	625.2	0.01134	0.01055	0.0113	0.01169
625.1	0.6258	0.7739	1.25719	1.75584	625.1	0.01138	0.01053	0.01131	0.01168
625	0.5864	0.59924	1.50219	1.92375	625	0.01139	0.01055	0.01133	0.01169
624.9	0.74396	0.63629	1.31872	1.7144	624.9	0.01141	0.01056	0.01133	0.01172
624.8	0.68777	0.7986	1.34188	1.73985	624.8	0.0114	0.01053	0.01137	0.01171
624.7	0.69356	0.78568	1.39211	1.73636	624.7	0.01141	0.01057	0.01139	0.01174
624.6	0.55327	0.918	1.48812	1.99914	624.6	0.01143	0.01059	0.0114	0.01174
624.5	0.54701	1.04868	1.49091	1.78847	624.5	0.01141	0.0106	0.0114	0.01174
624.4	0.64576	1.02954	1.45823	1.95135	624.4	0.01144	0.01062	0.01144	0.01177
624.3	0.71883	1.17196	1.53698	2.10889	624.3	0.01145	0.01064	0.01151	0.01179
624.2	0.76222	1.19828	1.78064	2.02219	624.2	0.01143	0.01065	0.01155	0.0118
624.1	0.77015	1.04005	1.47337	1.78275	624.1	0.01144	0.01069	0.01156	0.01182
624	0.93296	0.92435	1.43888	1.66641	624	0.01148	0.01071	0.01158	0.0118
623.9	0.79365	0.96748	1.39787	1.7322	623.9	0.01147	0.0107	0.01159	0.01181
623.8	0.79796	0.9329	1.28926	1.70506	623.8	0.0115	0.01074	0.01159	0.01181
623.7	0.95122	0.95828	1.22725	1.83672	623.7	0.0115	0.01075	0.01161	0.01185
623.6	1.05715	1.0288	1.28358	1.87631	623.6	0.0115	0.0108	0.01165	0.01185
623.5	1.00186	1.33714	1.01504	1.91953	623.5	0.01153	0.01087	0.01166	0.01192
623.4	1.07247	1.36886	0.90741	1.78602	623.4	0.01154	0.01085	0.01168	0.01195
623.3	1.19579	1.46221	0.71957	1.84271	623.3	0.01156	0.01086	0.0117	0.01197
623.2	1.48215	1.34261	0.77717	1.86889	623.2	0.01161	0.01082	0.01169	0.01199
623.1	1.48013	1.24397	0.76455	2.07888	623.1	0.01166	0.01086	0.01171	0.01204
623	1.36744	1.5141	0.91129	2.24474	623	0.01167	0.01087	0.01172	0.01208
622.9	1.32756	1.49057	0.68828	2.13983	622.9	0.01169	0.0109	0.01173	0.01209
622.8	1.10459	1.58621	0.79636	2.11953	622.8	0.01173	0.0109	0.01179	0.01218
622.7	1.00034	1.30678	0.8984	2.05766	622.7	0.01172	0.01093	0.01181	0.01221
622.6	1.14421	1.28851	0.71192	2.19042	622.6	0.01174	0.01096	0.01184	0.01224
622.5	1.04109	1.36995	0.52852	2.10804	622.5	0.01178	0.011	0.01185	0.01227
622.4	1.11551	1.38453	0.76032	2.18107	622.4	0.01178	0.01103	0.01185	0.0123
622.3	1.15551	1.44455	0.88503	2.19139	622.3	0.01173	0.01105	0.01187	0.01234
622.2	1.37411	1.72367	1.07137	2.00346	622.2	0.01174	0.01107	0.01187	0.01238
622.1	1.46471	1.58163	1.10317	1.86955	622.1	0.01177	0.01109	0.0119	0.0124
622	1.64901	1.74931	0.85686	2.05843	622	0.0118	0.01115	0.01187	0.01242
621.9	1.5856	1.6462	0.76503	2.04863	621.9	0.01182	0.01117	0.0119	0.01245
621.8	1.35947	1.63042	0.64	1.92764	621.8	0.01185	0.01119	0.01191	0.01248
621.7	1.2684	1.55824	0.70138	2.04914	621.7	0.01186	0.01125	0.01195	0.01251
621.6	1.17194	1.3622	0.69092	1.9469	621.6	0.0119	0.01131	0.01197	0.01254
621.5	1.25487	1.21578	0.65738	2.04864	621.5	0.01192	0.01132	0.01199	0.01254
621.4	1.20304	1.1116	0.48592	2.07082	621.4	0.01192	0.01134	0.01201	0.01255
621.3	1.18978	0.95422	0.40249	2.1102	621.3	0.01201	0.01139	0.01202	0.0126
621.2	1.1465	0.97078	0.45411	2.03604	621.2	0.01203	0.01139	0.01206	0.01261
621.1	0.90773	1.01171	0.50165	1.92582	621.1	0.01209	0.01142	0.01205	0.01265
621	0.99073	0.85292	0.26148	1.89541	621	0.01218	0.01143	0.01209	0.01269
620.9	1.0505	1.00687	0.27948	2.11112	620.9	0.01219	0.0114	0.01213	0.0127
620.8	1.16995	1.12117	0.26151	2.14521	620.8	0.01222	0.01139	0.01218	0.01275
620.7	1.31509	1.43333	0.33662	2.28173	620.7	0.01226	0.01141	0.01223	0.01276
620.6	1.28954	1.48361	0.27133	2.04366	620.6	0.01228	0.01141	0.01226	0.01275
620.5	1.39215	1.45657	0.17785	1.92501	620.5	0.01233	0.01143	0.01226	0.01278
620.4	1.27882	1.38877	-0.01075	2.0812	620.4	0.01235	0.0114	0.01231	0.01283
620.3	1.22337	1.34942	0.19223	2.03858	620.3	0.01236	0.01143	0.01235	0.01281
620.2	1.15846	1.23148	0.594	2.11343	620.2	0.01241	0.01148	0.01237	0.01285
620.1	1.20676	1.24433	0.55423	1.88375	620.1	0.01246	0.01151	0.01242	0.01287
620	1.16103	1.32982	0.55613	1.8257	620	0.01248	0.01154	0.01247	0.01289
619.9	0.97308	1.27339	0.74076	1.88968	619.9	0.01249	0.01159	0.01249	0.01289
619.8	0.91201	1.20695	0.56412	1.87755	619.8	0.01252	0.0116	0.01253	0.01288
619.7	1.16486	1.2807	0.53837	1.85872	619.7	0.01255	0.0116	0.01254	0.0129
619.6	1.28865	1.06357	0.39167	1.66746	619.6	0.01256	0.01163	0.01253	0.01289
619.5	1.11878	1.13438	0.41214	1.67747	619.5	0.01256	0.01163	0.01254	0.01292
619.4	1.11541	1.15547	0.3963	1.78553	619.4	0.01259	0.01165	0.0126	0.01292
619.3	1.06898	1.02256	0.2109	1.85024	619.3	0.01258	0.01167	0.01262	0.01292
619.2	0.99425	1.03362	0.00337	1.78815	619.2	0.01262	0.01172	0.01265	0.01295
619.1	0.7882	1.08728	-0.3471	1.81308	619.1	0.01267	0.01171	0.01269	0.013
619	0.76891	1.23138	-0.47716	1.85667	619	0.01269	0.01172	0.01273	0.01301
618.9	0.50059	1.19617	-0.45514	1.77557	618.9	0.0127	0.01173	0.01275	0.01305
618.8	0.37988	1.25764	-0.43163	1.87964	618.8	0.0127	0.01173	0.0128	0.01305
618.7	0.48258	1.27079	-0.31092	1.7607	618.7	0.0127	0.01176	0.01286	0.01312
618.6	0.66708	1.22597	-0.39542	1.5556	618.6	0.01272	0.01178	0.01291	0.01316
618.5	0.83565	1.31401	-0.40951	1.61961	618.5	0.01277	0.01181	0.0129	0.01319
618.4	0.82842	1.23234	-0.53434	1.64797	618.4	0.0128	0.01183	0.01294	0.01323
618.3	0.74996	1.36626	-0.6021	1.40441	618.3	0.01283	0.01185	0.01299	0.01328
618.2	0.96566	1.32214	-0.39011	1.21137	618.2	0.01285	0.01184	0.01304	0.01333
618.1	1.0089	1.3365	-0.23695	1.23269	618.1	0.01285	0.01185	0.01307	0.01334
618	0.96	1.1841	-0.34567	1.25918	618	0.01283	0.01184	0.01309	0.01337
617.9	1.0244	1.28808	-0.23023	1.38557	617.9	0.01283	0.01189	0.01312	0.01339
617.8	1.07835	1.48226	-0.15595	1.58492	617.8	0.01283	0.01193	0.01311	0.01343
617.7	1.00036	1.61028	-0.135	1.63753	617.7	0.01289	0.01198	0.01312	0.01346
617.6	1.01558	1.53914	-0.17334	1.731	617.6	0.01292	0.01202	0.01315	0.01347
617.5	0.90504	1.38603	-0.21497	1.8425	617.5	0.01296	0.01208	0.01313	0.01349
617.4	0.68029	1.33341	-0.18314	1.91516	617.4	0.01299	0.0121	0.01316	0.01353
617.3	0.74687	1.35655	-0.07165	2.05294	617.3	0.01301	0.01213	0.01315	0.01356
617.2	0.55952	1.13177	0.01264	1.85074	617.2	0.01303	0.01217	0.01317	0.01357
617.1	0.71194	1.0575	-0.06292	1.77702	617.1	0.01303	0.01218	0.0132	0.01361
617	0.59123	0.85562	-0.20627	1.81258	617	0.01305	0.01219	0.01321	0.01361
616.9	0.60887	0.83443	-0.11594	1.93161	616.9	0.01304	0.01218	0.01321	0.01364
616.8	0.4801	0.67831	-0.1965	1.98477	616.8	0.01306	0.0122	0.01323	0.01368
616.7	0.59929	0.63938	-0.3121	1.77391	616.7	0.01306	0.01221	0.01323	0.01369
616.6	0.65409	0.74787	-0.20496	1.83742	616.6	0.01306	0.01226	0.01324	0.01375
616.5	0.48896	0.69485	-0.1809	1.95466	616.5	0.01308	0.01231	0.01325	0.01381
616.4	0.26636	0.78343	-0.15724	2.00662	616.4	0.01306	0.01233	0.01327	0.01386
616.3	0.56151	0.69319	-0.46175	1.9029	616.3	0.01312	0.01234	0.01329	0.01386
616.2	0.61678	0.77351	-0.33852	1.6937	616.2	0.01315	0.01235	0.01329	0.01389
616.1	0.59211	0.80004	-0.2259	1.59751	616.1	0.01321	0.01238	0.01332	0.01392
616	0.55298	0.78051	-0.31237	1.66589	616	0.01326	0.01238	0.01335	0.01392
615.9	0.64955	0.67665	0.05688	1.78763	615.9	0.01327	0.01242	0.01336	0.01394
615.8	0.41005	0.67107	0.09656	1.79539	615.8	0.0133	0.01244	0.01337	0.01394
615.7	0.60417	0.69001	-0.00672	2.04178	615.7	0.01332	0.01246	0.01342	0.01393
615.6	0.80135	0.65254	0.16552	1.90003	615.6	0.01337	0.0125	0.01342	0.01398
615.5	0.90422	0.85168	0.17699	1.96786	615.5	0.01339	0.01255	0.01344	0.01398
615.4	0.95588	0.83905	0.44428	2.0203	615.4	0.01344	0.01256	0.01343	0.01398
615.3	0.79908	0.70428	0.46939	1.81069	615.3	0.01345	0.01259	0.01347	0.01402
615.2	0.68798	0.94195	0.59192	1.89413	615.2	0.01346	0.0126	0.0135	0.01407
615.1	0.7331	1.04124	0.75878	1.7935	615.1	0.01349	0.01261	0.01352	0.01409
615	0.54897	1.04231	0.54342	2.09143	615	0.01347	0.01263	0.01353	0.01413
614.9	0.64063	1.09854	0.53007	2.18462	614.9	0.01351	0.01268	0.01356	0.01415
614.8	0.62787	0.99572	0.7332	2.19253	614.8	0.01351	0.01272	0.01357	0.0142
614.7	0.49596	0.96269	0.57406	2.10905	614.7	0.01353	0.01277	0.0136	0.01423
614.6	0.37714	0.70629	0.73555	2.12527	614.6	0.0135	0.01278	0.01362	0.01423
614.5	0.20591	0.34957	0.73712	2.41364	614.5	0.01349	0.01282	0.01364	0.01427
614.4	0.18135	0.18382	0.72657	2.26597	614.4	0.01352	0.01282	0.01368	0.0143
614.3	0.29192	0.14382	0.90251	2.19374	614.3	0.01355	0.01284	0.0137	0.01432
614.2	0.37177	0.14363	0.92414	1.97055	614.2	0.01355	0.01286	0.01375	0.01435
614.1	0.43817	0.0583	0.85835	2.1307	614.1	0.01359	0.0129	0.01378	0.01437
614	0.37675	0.12727	0.75005	1.87355	614	0.01363	0.01291	0.01382	0.01437
613.9	0.54256	0.27936	0.76153	2.03308	613.9	0.01365	0.01293	0.01382	0.01441
613.8	0.44925	0.29522	0.67434	2.13417	613.8	0.01369	0.01298	0.01384	0.0144
613.7	0.42838	0.53781	0.76701	2.10366	613.7	0.01372	0.01297	0.01388	0.01446
613.6	0.32917	0.74798	0.69113	2.07077	613.6	0.01378	0.01302	0.01392	0.01445
613.5	0.51672	0.82755	0.80348	1.9338	613.5	0.01377	0.01304	0.01396	0.01448
613.4	0.59331	0.76393	0.78009	2.15022	613.4	0.01382	0.01304	0.01402	0.0145
613.3	0.44384	0.71885	0.67607	2.19839	613.3	0.01387	0.01303	0.01405	0.01452
613.2	0.53805	0.65067	0.81995	2.16018	613.2	0.01385	0.01303	0.01409	0.01455
613.1	0.72081	0.76045	0.79598	2.02725	613.1	0.0139	0.01305	0.01414	0.01452
613	0.85608	0.83985	0.88706	2.26952	613	0.01393	0.01308	0.01415	0.01454
612.9	0.55879	0.71498	0.99635	2.068	612.9	0.01397	0.01315	0.01419	0.01459
612.8	0.64712	0.59422	1.06522	2.21957	612.8	0.01398	0.01317	0.01423	0.01463
612.7	0.86409	0.48301	1.39893	2.19803	612.7	0.01401	0.01321	0.01426	0.01463
612.6	0.73612	0.74685	1.40152	2.01507	612.6	0.01403	0.01321	0.01426	0.01468
612.5	0.95416	0.59874	1.37211	1.99813	612.5	0.01407	0.01326	0.01429	0.01473
612.4	0.95863	0.35145	1.4928	1.84124	612.4	0.01409	0.01325	0.01429	0.01479
612.3	0.95663	0.45374	1.54025	1.73881	612.3	0.01415	0.01327	0.01432	0.01484
612.2	0.89892	0.41996	1.52059	1.65699	612.2	0.01415	0.01332	0.01434	0.0149
612.1	0.77874	0.37246	1.43265	1.68239	612.1	0.01421	0.01335	0.01438	0.01491
612	1.037	0.42926	1.51239	1.97237	612	0.01422	0.01339	0.01439	0.01495
611.9	0.91825	0.34547	1.30213	1.99583	611.9	0.01425	0.01342	0.0144	0.01495
611.8	0.94901	0.26227	1.42824	2.24951	611.8	0.01429	0.01345	0.01442	0.01494
611.7	1.04974	0.17586	1.67284	2.20385	611.7	0.01434	0.01347	0.01446	0.01499
611.6	1.21497	0.23273	1.47539	2.26252	611.6	0.01439	0.01349	0.01446	0.01498
611.5	1.09574	0.32742	1.59384	2.33352	611.5	0.01439	0.01352	0.01449	0.01502
611.4	1.10479	0.59358	1.33144	2.22112	611.4	0.01447	0.01355	0.0145	0.01504
611.3	1.05732	0.73806	1.57373	2.27113	611.3	0.01453	0.01356	0.01454	0.01509
611.2	1.00547	1.01257	1.35651	2.00735	611.2	0.01457	0.0136	0.01455	0.01512
611.1	1.03071	1.34423	1.49879	1.79942	611.1	0.01463	0.01361	0.01461	0.01512
611	0.86801	1.53678	1.45713	1.70423	611	0.01463	0.01366	0.01467	0.01513
610.9	0.83421	1.46306	1.21334	1.79485	610.9	0.01462	0.01369	0.01472	0.01519
610.8	0.88626	1.32763	1.26	1.84568	610.8	0.01464	0.01373	0.01474	0.01524
610.7	0.99612	1.34024	1.04537	1.67756	610.7	0.01464	0.01375	0.01475	0.01526
610.6	1.06398	1.29145	1.22468	1.84947	610.6	0.01468	0.01375	0.01481	0.0153
610.5	1.12528	1.08898	1.0801	2.01139	610.5	0.01469	0.01379	0.01482	0.01534
610.4	1.18497	1.04382	1.1449	2.0039	610.4	0.01467	0.01379	0.01485	0.01539
610.3	1.30404	1.09291	1.05993	2.19442	610.3	0.01466	0.0138	0.01487	0.01541
610.2	1.33079	0.77974	1.13786	2.43426	610.2	0.01468	0.01384	0.01489	0.01547
610.1	1.09615	0.59695	1.14797	2.44522	610.1	0.01473	0.01388	0.01495	0.01552
610	1.0642	0.63247	1.17271	2.49759	610	0.01475	0.01394	0.01496	0.01558
609.9	1.14886	0.7484	1.30872	2.52227	609.9	0.01476	0.01403	0.015	0.01557
609.8	1.03889	0.8749	1.23492	2.7437	609.8	0.01486	0.01406	0.01506	0.01561
609.7	0.85094	0.81436	1.36977	2.61564	609.7	0.01486	0.0141	0.01508	0.01564
609.6	0.86047	0.60496	1.31491	2.84415	609.6	0.01491	0.01413	0.01513	0.0157
609.5	0.97232	0.69929	1.12041	3.01008	609.5	0.01492	0.01414	0.01516	0.01573
609.4	0.92185	0.85078	1.08049	2.88113	609.4	0.01494	0.01416	0.01519	0.01578
609.3	0.82237	0.82294	0.80364	2.72286	609.3	0.015	0.01418	0.01521	0.01582
609.2	0.6389	0.80227	0.91132	2.64922	609.2	0.01501	0.0142	0.01529	0.01584
609.1	0.79864	1.01858	0.74815	3.00636	609.1	0.01501	0.01421	0.01529	0.01587
609	0.61228	0.93744	0.66614	3.1638	609	0.01504	0.0143	0.01533	0.0159
608.9	0.5703	0.93299	0.47109	3.2439	608.9	0.01507	0.01431	0.01534	0.01593
608.8	0.44527	0.6786	0.46849	3.25105	608.8	0.0151	0.01436	0.0154	0.01594
608.7	0.35744	0.78078	0.62569	3.0972	608.7	0.01512	0.0144	0.01542	0.01598
608.6	0.1934	0.58862	0.42618	3.18654	608.6	0.01516	0.01443	0.01546	0.01599
608.5	0.09645	0.75134	0.51137	3.2663	608.5	0.01517	0.01447	0.01549	0.01606
608.4	0.08135	0.58608	0.27885	3.24447	608.4	0.01523	0.01454	0.01555	0.01613
608.3	0.04262	0.38936	0.01295	3.30371	608.3	0.01526	0.01458	0.01555	0.01614
608.2	-0.000921185	0.51492	-0.01677	3.38619	608.2	0.01529	0.01463	0.01558	0.0162
608.1	0.01406	0.46634	-0.13618	3.21044	608.1	0.01532	0.01462	0.01556	0.01623
608	0.02125	0.27377	-0.15771	3.49012	608	0.01532	0.01465	0.01562	0.01629
607.9	0.04337	0.2264	-0.42891	3.4427	607.9	0.01533	0.0147	0.01563	0.01635
607.8	0.27469	0.01537	-0.42905	3.47342	607.8	0.01532	0.01467	0.01565	0.01638
607.7	0.29393	-0.02314	-0.57353	3.60405	607.7	0.01536	0.01472	0.01566	0.01642
607.6	0.34061	0.05865	-0.49768	3.46837	607.6	0.01539	0.01475	0.01568	0.01643
607.5	0.37239	0.17287	-0.47969	3.51102	607.5	0.01544	0.01476	0.01571	0.01645
607.4	0.5105	0.26172	-0.50342	3.91404	607.4	0.01546	0.01479	0.01575	0.01648
607.3	0.3864	0.42796	-0.43668	3.90933	607.3	0.01551	0.01487	0.01579	0.0165
607.2	0.3397	0.49835	-0.51293	3.85763	607.2	0.01555	0.01491	0.01581	0.01657
607.1	0.49162	0.45936	-0.32582	3.89167	607.1	0.01561	0.01492	0.01582	0.01658
607	0.55472	0.27397	-0.27879	3.69349	607	0.01566	0.01499	0.01584	0.01663
606.9	0.25305	0.49302	-0.45421	3.61977	606.9	0.0157	0.015	0.01589	0.01668
606.8	0.29626	0.60575	-0.69895	3.78895	606.8	0.01576	0.01504	0.01588	0.0167
606.7	0.33824	0.67062	-0.86878	3.48724	606.7	0.01574	0.01507	0.01589	0.01675
606.6	0.24197	0.53304	-0.93787	3.3775	606.6	0.01577	0.01506	0.01595	0.01681
606.5	0.15376	0.43002	-0.86667	3.32229	606.5	0.01578	0.01509	0.01595	0.01686
606.4	0.21438	0.35909	-1.31571	3.4609	606.4	0.01583	0.0151	0.01597	0.01691
606.3	0.2585	0.3986	-1.29002	3.07959	606.3	0.01588	0.01514	0.01598	0.01692
606.2	0.27215	0.34009	-1.03907	3.09554	606.2	0.01587	0.01517	0.01599	0.01692
606.1	0.28249	0.18491	-1.14739	3.31451	606.1	0.01592	0.0152	0.01603	0.01693
606	0.33078	0.12069	-1.10419	3.4116	606	0.01587	0.01523	0.01607	0.01697
605.9	0.40832	0.08788	-1.03396	3.43488	605.9	0.01591	0.01527	0.0161	0.01699
605.8	0.2024	-0.15216	-0.91862	3.04327	605.8	0.01594	0.01531	0.01618	0.01699
605.7	0.38672	-0.01605	-0.98928	3.06968	605.7	0.01597	0.01532	0.0162	0.01703
605.6	0.40831	-0.00842	-0.6776	3.01505	605.6	0.01602	0.01535	0.01623	0.01706
605.5	0.5402	-0.07083	-0.84615	3.13676	605.5	0.01607	0.01535	0.01625	0.01714
605.4	0.50652	0.12604	-0.95062	2.88337	605.4	0.01611	0.01535	0.01626	0.0172
605.3	0.44795	0.23647	-0.76493	2.87451	605.3	0.01616	0.01533	0.01629	0.01721
605.2	0.38095	0.3016	-0.7269	2.96903	605.2	0.01616	0.01535	0.0163	0.01722
605.1	0.32857	0.47187	-0.50982	2.80083	605.1	0.01618	0.01534	0.01634	0.01725
605	0.49742	0.53194	-0.18644	2.6138	605	0.01622	0.01537	0.01639	0.01732
604.9	0.54284	0.48558	-0.12428	2.62218	604.9	0.01623	0.01538	0.01647	0.01736
604.8	0.59805	0.40061	-0.21873	2.468	604.8	0.01628	0.0154	0.01653	0.01738
604.7	0.61049	0.38712	0.03076	2.32565	604.7	0.01632	0.01545	0.0166	0.01739
604.6	0.63428	0.59424	0.10572	2.37935	604.6	0.01642	0.0155	0.01664	0.01738
604.5	0.65841	0.65212	0.31607	2.44908	604.5	0.01648	0.01556	0.0167	0.01742
604.4	0.8325	0.42407	0.39249	2.44296	604.4	0.01653	0.01558	0.0167	0.01747
604.3	0.76089	0.37557	0.47758	2.60045	604.3	0.01657	0.01558	0.01674	0.01753
604.2	0.61035	0.11599	0.6188	2.56079	604.2	0.01661	0.01562	0.01678	0.01756
604.1	0.49127	0.04921	0.54536	2.53241	604.1	0.01665	0.01564	0.01679	0.01762
604	0.44632	0.13151	0.45393	2.40847	604	0.01667	0.01564	0.01684	0.01765
603.9	0.37834	0.12338	0.36507	2.48793	603.9	0.01674	0.01565	0.01693	0.0177
603.8	0.43257	0.3567	0.35762	2.48142	603.8	0.01675	0.01565	0.01694	0.01772
603.7	0.47504	0.223	0.35412	2.62035	603.7	0.0168	0.01571	0.01696	0.01774
603.6	0.7796	0.53043	0.53464	2.62341	603.6	0.01684	0.01573	0.01701	0.01775
603.5	0.72716	0.48666	1.03611	2.65114	603.5	0.01693	0.01578	0.01705	0.01775
603.4	0.82251	0.52289	1.27926	2.73518	603.4	0.01701	0.01585	0.01706	0.01778
603.3	0.87663	0.62	1.24348	2.71748	603.3	0.01706	0.0159	0.01709	0.01782
603.2	0.85478	0.53258	1.74126	2.76202	603.2	0.0171	0.01597	0.01714	0.01785
603.1	0.8997	0.56492	1.93379	2.81863	603.1	0.01714	0.01597	0.01718	0.01789
603	0.96512	0.59001	2.08379	2.9215	603	0.01721	0.01601	0.01723	0.01795
602.9	1.12384	0.72423	2.07311	2.97798	602.9	0.01725	0.01605	0.01727	0.01801
602.8	0.92276	0.92879	2.40448	3.03448	602.8	0.01733	0.01603	0.01729	0.01807
602.7	1.05729	0.8596	2.33949	3.32287	602.7	0.01738	0.01605	0.01731	0.0181
602.6	1.11133	1.13604	2.03067	3.41551	602.6	0.01742	0.01608	0.01733	0.01817
602.5	1.04764	1.06973	2.06706	3.14203	602.5	0.01744	0.01614	0.01736	0.01819
602.4	1.02208	1.00603	2.18599	3.34525	602.4	0.01747	0.01616	0.01741	0.01824
602.3	0.90902	1.07299	2.18468	3.19925	602.3	0.01751	0.0162	0.01745	0.01824
602.2	0.83105	0.91511	2.33149	3.13145	602.2	0.01753	0.01622	0.01749	0.01826
602.1	1.02979	0.94577	2.18235	2.6921	602.1	0.01758	0.01628	0.01755	0.01827
602	1.02332	0.77059	2.04602	2.46292	602	0.01766	0.0163	0.01759	0.01832
601.9	1.17854	0.72115	1.86137	2.67173	601.9	0.0177	0.01633	0.01765	0.01835
601.8	0.78811	0.70596	1.52323	2.87349	601.8	0.01775	0.01636	0.01766	0.01838
601.7	0.97608	0.67263	1.4945	2.93632	601.7	0.0178	0.01645	0.01768	0.01842
601.6	1.06213	0.79865	1.38984	3.02896	601.6	0.01784	0.01647	0.01771	0.01846
601.5	1.11465	0.91584	1.52413	3.2492	601.5	0.01785	0.01648	0.01771	0.01851
601.4	1.08043	0.75378	1.49204	3.16534	601.4	0.01787	0.01651	0.01774	0.01857
601.3	1.18995	0.87682	1.47674	3.00168	601.3	0.0179	0.01652	0.01776	0.01863
601.2	1.12326	0.96948	1.2971	2.79511	601.2	0.01794	0.01655	0.01782	0.0187
601.1	0.97908	0.82356	1.3442	2.85234	601.1	0.01798	0.0166	0.01783	0.01873
601	1.04841	0.89085	1.49112	2.74194	601	0.01803	0.01665	0.01786	0.0188
600.9	1.19103	0.89779	1.65453	2.63296	600.9	0.01808	0.01668	0.0179	0.01883
600.8	1.17032	1.01464	1.94968	2.50299	600.8	0.01811	0.01675	0.01794	0.01886
600.7	1.22234	1.13028	1.95279	2.79322	600.7	0.01813	0.01676	0.01797	0.01889
600.6	1.08687	0.97207	1.65577	2.81142	600.6	0.01818	0.01682	0.018	0.0189
600.5	1.11397	1.14313	1.62312	2.76532	600.5	0.01826	0.01686	0.01804	0.01894
600.4	0.83421	0.83768	1.54525	2.7672	600.4	0.01824	0.0169	0.01808	0.019
600.3	1.01979	0.81841	1.46307	3.12468	600.3	0.01826	0.01694	0.01812	0.01906
600.2	1.20139	0.75774	1.44335	3.34542	600.2	0.0183	0.01692	0.01815	0.01911
600.1	1.16855	0.71348	1.50996	3.30032	600.1	0.01835	0.01694	0.0182	0.01916
600	1.10155	0.64723	1.2139	3.47541	600	0.01836	0.01695	0.01822	0.01922
599.9	1.14841	0.74267	0.80471	3.23797	599.9	0.0184	0.01699	0.01826	0.01927
599.8	1.18503	0.65727	0.68678	3.08287	599.8	0.01842	0.01701	0.01834	0.01934
599.7	1.08077	0.5907	0.60015	3.08001	599.7	0.01847	0.01703	0.01838	0.01939
599.6	1.07603	0.61063	0.53224	3.19867	599.6	0.01852	0.01709	0.01841	0.01943
599.5	1.11821	0.66511	0.45402	3.02477	599.5	0.01856	0.01714	0.01845	0.01952
599.4	1.29574	0.66676	0.4282	3.05578	599.4	0.01865	0.01719	0.01851	0.01954
599.3	1.21518	0.64585	0.65661	2.96866	599.3	0.0187	0.01722	0.01858	0.01957
599.2	0.89924	0.76155	0.48257	2.75768	599.2	0.01874	0.01726	0.01861	0.0196
599.1	1.00531	0.6128	0.4509	2.6045	599.1	0.01876	0.01727	0.01863	0.01966
599	1.20292	0.55783	0.33796	2.82538	599	0.0188	0.01736	0.01863	0.01969
598.9	1.45897	0.50877	0.43517	2.96572	598.9	0.01879	0.01741	0.01864	0.0198
598.8	1.52074	0.45507	0.5286	3.33331	598.8	0.01882	0.01742	0.01869	0.01985
598.7	1.43242	0.58403	0.52918	3.24353	598.7	0.01884	0.01746	0.01872	0.01991
598.6	1.63013	0.60796	0.56179	3.0194	598.6	0.01885	0.01752	0.01877	0.01994
598.5	1.64073	0.76904	0.53137	3.25937	598.5	0.0189	0.01755	0.0188	0.01999
598.4	1.38313	0.44864	0.42425	3.16458	598.4	0.01898	0.01758	0.01886	0.02006
598.3	1.20707	0.22354	0.34962	2.94783	598.3	0.01907	0.01763	0.01889	0.0201
598.2	1.25668	0.19326	0.01517	2.68548	598.2	0.0191	0.01767	0.01895	0.02013
598.1	1.30453	0.03236	0.12951	3.08676	598.1	0.01911	0.01772	0.01896	0.02018
598	1.11856	0.18097	-0.04087	3.18559	598	0.01915	0.01776	0.01899	0.02023
597.9	1.05151	-0.0593	-0.11095	3.2159	597.9	0.01917	0.01781	0.01904	0.02025
597.8	1.21823	-0.00916	-0.0393	3.32578	597.8	0.01917	0.01786	0.0191	0.02029
597.7	1.25518	0.12928	-0.40224	3.54363	597.7	0.01922	0.01792	0.01914	0.02031
597.6	1.2248	0.18411	-0.51287	3.77564	597.6	0.0193	0.01795	0.01918	0.02036
597.5	1.02126	0.02714	-0.64345	3.6068	597.5	0.01933	0.01799	0.0192	0.0204
597.4	1.08258	0.23202	-0.49227	3.52156	597.4	0.01938	0.01803	0.01925	0.02048
597.3	0.91989	0.19414	-0.39784	3.51267	597.3	0.01942	0.01807	0.0193	0.02054
597.2	1.0939	0.2555	-0.60673	3.05875	597.2	0.01945	0.01806	0.01934	0.02055
597.1	1.06085	0.39869	-0.61441	3.03845	597.1	0.01953	0.01808	0.01937	0.02059
597	0.98362	0.82503	-0.68927	2.77577	597	0.01956	0.01814	0.01937	0.0206
596.9	0.83499	0.74921	-0.60762	2.52849	596.9	0.01958	0.01821	0.01938	0.02064
596.8	0.73164	1.03088	-0.58242	2.49977	596.8	0.0196	0.01826	0.0194	0.02065
596.7	0.67479	0.90687	-0.47183	1.99357	596.7	0.01967	0.0183	0.01945	0.02069
596.6	0.60822	0.49253	-0.50636	2.17573	596.6	0.01969	0.01833	0.01947	0.02072
596.5	0.58988	0.88687	-0.55818	2.30054	596.5	0.01973	0.01838	0.01949	0.02071
596.4	0.4042	0.95144	-0.42636	2.31697	596.4	0.01977	0.01843	0.01955	0.02072
596.3	0.70624	0.86737	-0.35728	2.26482	596.3	0.01979	0.01849	0.01962	0.02073
596.2	0.6119	0.71908	-0.48557	2.10759	596.2	0.01981	0.01855	0.01967	0.02075
596.1	0.47293	0.71959	-0.23709	1.80166	596.1	0.01979	0.01858	0.01972	0.0208
596	0.77579	0.90079	-0.64583	2.01323	596	0.01983	0.01859	0.01973	0.02086
595.9	0.99734	1.05557	-0.64627	2.00659	595.9	0.01988	0.01865	0.0198	0.02089
595.8	0.8059	1.3386	-0.38594	2.38242	595.8	0.01995	0.01866	0.01986	0.02097
595.7	0.66102	1.32207	-0.45822	2.24166	595.7	0.02002	0.01866	0.01991	0.02103
595.6	0.50337	1.12915	-0.4531	2.40047	595.6	0.0201	0.01868	0.01995	0.02106
595.5	0.20333	1.07263	-0.47307	2.32166	595.5	0.02015	0.01873	0.01998	0.02108
595.4	0.23134	1.19587	-0.56683	2.27353	595.4	0.02022	0.01876	0.02001	0.02114
595.3	-0.06591	1.24739	-0.60104	2.51854	595.3	0.02027	0.01879	0.02002	0.02119
595.2	-0.11215	1.16774	-0.63313	2.53231	595.2	0.0203	0.01885	0.02008	0.02125
595.1	-0.13173	1.3273	-0.57728	2.44453	595.1	0.02029	0.01889	0.02006	0.02129
595	-0.32706	1.36035	-0.51817	2.62109	595	0.02031	0.01889	0.02011	0.0213
594.9	-0.38685	1.32361	-0.32335	2.90892	594.9	0.02032	0.0189	0.02017	0.02135
594.8	-0.64355	1.42657	-0.5188	2.65003	594.8	0.0204	0.01892	0.02025	0.02135
594.7	-0.42499	1.49473	-0.38097	2.58853	594.7	0.02045	0.01895	0.02029	0.02138
594.6	-0.20038	1.82515	-0.25867	2.71539	594.6	0.02045	0.01901	0.02032	0.02142
594.5	-0.21157	1.71139	-0.49387	2.58396	594.5	0.02049	0.01905	0.02033	0.02144
594.4	-0.28654	1.69263	-0.4709	2.37209	594.4	0.02054	0.01904	0.02037	0.02148
594.3	-0.39224	1.48465	-0.60733	2.24057	594.3	0.02056	0.01904	0.0204	0.02152
594.2	-0.30869	1.42345	-0.61929	2.33583	594.2	0.02063	0.01911	0.02042	0.02158
594.1	-0.22826	1.3011	-0.43859	2.3402	594.1	0.02066	0.01915	0.02044	0.02158
594	0.04991	1.35539	-0.28475	2.32079	594	0.02069	0.01918	0.02046	0.02164
593.9	-0.04143	1.02852	-0.06355	2.54534	593.9	0.0207	0.01925	0.0205	0.02172
593.8	-0.10072	1.02101	0.09286	2.71011	593.8	0.02077	0.01929	0.02056	0.02178
593.7	-0.02919	0.46299	0.14095	2.85868	593.7	0.0208	0.01933	0.02063	0.02183
593.6	-0.00895	0.5301	0.25772	3.05325	593.6	0.02086	0.01937	0.02071	0.02189
593.5	-0.00303	0.39613	0.26506	2.95467	593.5	0.02089	0.0194	0.02079	0.02195
593.4	0.03778	0.56774	0.12765	3.00056	593.4	0.02091	0.01945	0.02085	0.02203
593.3	-0.05428	0.64087	0.37824	2.94373	593.3	0.0209	0.01949	0.0209	0.02207
593.2	-0.0887	0.31131	0.29534	3.21308	593.2	0.02096	0.01956	0.02096	0.02214
593.1	-0.07735	0.23868	0.54471	3.24117	593.1	0.02101	0.01959	0.02098	0.02222
593	-0.11856	0.35391	0.51801	3.25847	593	0.02106	0.0196	0.021	0.02228
592.9	-0.24664	0.56656	0.80448	3.26994	592.9	0.02111	0.01961	0.02101	0.02235
592.8	-0.42532	0.52645	0.71492	3.42518	592.8	0.02116	0.01965	0.02104	0.02239
592.7	-0.39116	0.44844	0.80926	3.39736	592.7	0.0212	0.01972	0.02109	0.02246
592.6	-0.54333	0.18324	0.90968	3.60118	592.6	0.02122	0.01977	0.0211	0.02252
592.5	-0.49241	0.02575	0.75031	3.1778	592.5	0.02124	0.01983	0.02113	0.02255
592.4	-0.56595	0.08309	0.66288	3.16231	592.4	0.02129	0.0199	0.0212	0.02257
592.3	-0.28007	0.49448	0.53189	3.18703	592.3	0.02134	0.01995	0.02125	0.02259
592.2	-0.17018	0.43832	0.55324	3.1776	592.2	0.02137	0.01997	0.02133	0.02264
592.1	-0.2247	0.3906	0.72996	2.96979	592.1	0.02142	0.02001	0.02139	0.02265
592	-0.03602	0.21518	0.87968	3.05972	592	0.02144	0.02005	0.02145	0.02268
591.9	0.04954	0.27064	0.98761	2.89825	591.9	0.02145	0.02009	0.02147	0.02266
591.8	0.34028	0.58053	1.01837	2.81232	591.8	0.02153	0.02012	0.02154	0.0227
591.7	0.38914	0.49585	1.24144	2.73559	591.7	0.02155	0.02017	0.02157	0.02276
591.6	0.78357	0.68492	1.05764	2.82697	591.6	0.02161	0.02022	0.02158	0.0228
591.5	0.85639	0.93882	1.28003	2.89681	591.5	0.02165	0.02028	0.02163	0.02287
591.4	0.73128	0.71765	1.50298	2.72315	591.4	0.02166	0.02034	0.02166	0.02292
591.3	0.52726	0.88069	1.47167	2.7846	591.3	0.02168	0.02037	0.02171	0.023
591.2	0.41675	0.81318	1.53884	2.5956	591.2	0.02174	0.02039	0.02176	0.02306
591.1	0.68541	1.01718	1.34112	2.77309	591.1	0.02177	0.02043	0.0218	0.02311
591	1.01381	0.98191	1.25858	3.01705	591	0.02184	0.0205	0.02185	0.02315
590.9	0.997	1.10246	1.51302	3.03508	590.9	0.02184	0.02053	0.02192	0.0232
590.8	0.94535	0.88499	1.34761	3.06945	590.8	0.02189	0.02059	0.02204	0.02326
590.7	1.02685	0.65067	1.45049	2.97938	590.7	0.02197	0.02063	0.0221	0.02334
590.6	0.93947	1.22025	1.40686	3.10668	590.6	0.02199	0.02066	0.02214	0.02338
590.5	1.08916	1.23263	1.14645	3.26925	590.5	0.02205	0.02071	0.02216	0.02346
590.4	1.2621	1.4451	0.97507	3.13732	590.4	0.02211	0.02075	0.02222	0.0235
590.3	1.02938	1.5766	0.85045	3.05726	590.3	0.02215	0.0208	0.02224	0.02355
590.2	0.99075	1.51141	0.9767	3.24175	590.2	0.02218	0.02083	0.02225	0.02362
590.1	1.05191	1.62093	1.08465	3.27666	590.1	0.02221	0.02087	0.02225	0.02363
590	0.90173	1.73849	0.97818	3.58699	590	0.02228	0.02091	0.02226	0.02369
589.9	0.78155	1.86916	1.21734	3.48106	589.9	0.02228	0.02093	0.0223	0.02376
589.8	0.81105	1.91032	1.04857	3.22828	589.8	0.02229	0.02098	0.02239	0.0238
589.7	0.63083	1.6273	1.20067	3.30778	589.7	0.02238	0.02106	0.02243	0.02386
589.6	0.75898	1.58288	1.14541	3.29487	589.6	0.02247	0.02112	0.02249	0.02391
589.5	0.84974	1.61738	0.96186	3.2872	589.5	0.02255	0.02117	0.02253	0.02396
589.4	0.82188	1.63221	0.88351	3.35234	589.4	0.02261	0.02124	0.02257	0.02397
589.3	0.92738	1.84171	0.85852	3.04829	589.3	0.02269	0.02128	0.02259	0.02403
589.2	1.00485	1.70438	0.73752	3.40353	589.2	0.02276	0.02134	0.02266	0.02413
589.1	1.02679	1.55663	0.73269	3.74015	589.1	0.0228	0.0214	0.02268	0.0242
589	0.53227	1.40196	0.92788	3.57874	589	0.02284	0.02145	0.0227	0.02426
588.9	0.68754	1.26822	0.8613	3.75999	588.9	0.02286	0.0215	0.02272	0.0243
588.8	0.70382	0.98686	0.94902	3.95256	588.8	0.0229	0.02152	0.02277	0.02438
588.7	0.52664	1.4056	0.95387	4.00137	588.7	0.02295	0.02159	0.02281	0.02446
588.6	0.66464	1.25461	0.87673	4.14228	588.6	0.02298	0.02164	0.02288	0.02458
588.5	0.50481	1.14599	0.76735	4.55282	588.5	0.02302	0.02172	0.02296	0.02462
588.4	0.59341	1.20112	0.65117	4.64244	588.4	0.02308	0.02179	0.02305	0.02468
588.3	0.4046	0.9643	0.96473	4.56651	588.3	0.02315	0.02185	0.0231	0.02476
588.2	0.66034	0.68777	0.63913	4.36555	588.2	0.0232	0.02189	0.02315	0.02484
588.1	0.65965	0.73705	0.63805	4.57948	588.1	0.02327	0.02194	0.02321	0.02488
588	0.71325	0.70113	0.87455	4.55727	588	0.02333	0.02198	0.02327	0.02492
587.9	0.50067	0.58744	0.98244	4.44796	587.9	0.02341	0.02205	0.02333	0.02497
587.8	-0.00547	0.46305	1.22162	4.55353	587.8	0.02348	0.02213	0.0234	0.02507
587.7	0.05633	0.65728	1.1276	4.41116	587.7	0.02355	0.02218	0.02346	0.02514
587.6	-0.10951	0.90473	1.0484	4.28985	587.6	0.02356	0.02222	0.02347	0.02519
587.5	-0.31174	1.08809	0.8821	4.53488	587.5	0.02357	0.02227	0.02351	0.02521
587.4	-0.44838	0.90444	0.58807	4.50316	587.4	0.02364	0.02229	0.02363	0.02526
587.3	-0.44904	0.55382	0.70167	4.33186	587.3	0.02372	0.02234	0.0237	0.02531
587.2	-0.40826	0.73886	0.69054	4.46371	587.2	0.02376	0.02237	0.02374	0.02531
587.1	-0.27054	0.68735	0.55952	4.11071	587.1	0.02379	0.0224	0.02381	0.02542
587	-0.02371	0.7366	0.42875	4.12037	587	0.02386	0.02242	0.02386	0.02544
586.9	-0.26298	0.7404	0.38429	4.33724	586.9	0.02393	0.02248	0.02392	0.02547
586.8	0.20346	0.53062	0.72157	4.37332	586.8	0.02401	0.02253	0.02398	0.02552
586.7	0.42486	0.57658	0.63371	4.41608	586.7	0.02408	0.02258	0.02406	0.02557
586.6	0.53001	0.62845	0.38884	4.55626	586.6	0.02413	0.02262	0.02409	0.02562
586.5	0.62949	0.72098	0.29892	4.93687	586.5	0.02418	0.02268	0.02412	0.0257
586.4	0.84403	1.04634	0.12526	5.18904	586.4	0.0242	0.0227	0.02415	0.02572
586.3	0.91134	1.16382	0.30211	5.19748	586.3	0.02424	0.02274	0.0242	0.02573
586.2	0.78953	1.01313	0.49459	5.20606	586.2	0.02428	0.02275	0.0243	0.02581
586.1	0.8619	1.21864	0.48693	5.17866	586.1	0.02434	0.02275	0.02436	0.02584
586	0.70912	1.04699	0.38973	5.22211	586	0.02436	0.0228	0.02442	0.02592
585.9	0.5767	1.18441	0.44079	5.18775	585.9	0.02442	0.02285	0.02448	0.02597
585.8	0.96644	1.15138	0.41449	4.85712	585.8	0.02449	0.02287	0.02454	0.026
585.7	1.33234	1.38472	0.40885	5.02099	585.7	0.02453	0.02289	0.0246	0.02605
585.6	1.42409	1.35045	0.3033	4.74338	585.6	0.0246	0.02296	0.02466	0.02607
585.5	1.35644	1.69144	0.26879	4.64316	585.5	0.02466	0.02303	0.02474	0.02615
585.4	1.55631	1.42434	0.36851	4.56107	585.4	0.02473	0.02307	0.02478	0.02623
585.3	1.37642	1.25447	0.36363	4.53629	585.3	0.0248	0.02312	0.02481	0.02627
585.2	1.61312	1.19366	0.49353	4.18398	585.2	0.02485	0.02316	0.02487	0.02632
585.1	1.64055	0.96655	0.61877	3.90263	585.1	0.02492	0.02318	0.02491	0.02639
585	1.71153	1.0534	0.42592	3.94931	585	0.02498	0.02324	0.025	0.02643
584.9	1.48737	1.3585	0.29348	3.80555	584.9	0.02502	0.02326	0.02503	0.02646
584.8	1.49268	1.40694	0.14859	3.55432	584.8	0.0251	0.02331	0.02508	0.02654
584.7	1.31069	1.26125	-0.27852	3.77823	584.7	0.02518	0.02336	0.02516	0.0266
584.6	1.13916	1.23513	-0.87133	4.02229	584.6	0.02525	0.02341	0.0252	0.02665
584.5	1.3692	1.16813	-0.54155	4.13378	584.5	0.02533	0.02346	0.02525	0.02671
584.4	1.40336	1.14371	-0.66517	4.12401	584.4	0.02539	0.02349	0.02532	0.02677
584.3	1.64845	1.31349	-0.66656	4.15251	584.3	0.02546	0.02354	0.02536	0.02682
584.2	1.68264	1.50552	-0.40548	4.04485	584.2	0.02554	0.0236	0.02542	0.02692
584.1	1.73625	1.54215	-0.21609	4.03477	584.1	0.02561	0.02367	0.02542	0.02699
584	1.63428	1.44554	-0.22423	4.27764	584	0.02566	0.02369	0.02544	0.02703
583.9	1.75414	1.56786	-0.16423	4.20776	583.9	0.0257	0.02376	0.02548	0.02708
583.8	1.62257	1.61987	0.12234	4.24952	583.8	0.02575	0.0238	0.02554	0.02716
583.7	1.17085	1.50075	-0.21405	4.32803	583.7	0.02581	0.02386	0.0256	0.02723
583.6	1.26699	1.44601	-0.43623	3.99013	583.6	0.02586	0.0239	0.0257	0.02734
583.5	0.91493	1.33334	-0.72786	4.14427	583.5	0.02593	0.02394	0.02577	0.02744
583.4	0.65675	1.58744	-1.00413	4.27445	583.4	0.02601	0.024	0.02582	0.0275
583.3	0.66897	1.50958	-0.85645	3.90775	583.3	0.02609	0.02404	0.02587	0.02757
583.2	0.78813	1.35532	-1.05279	3.88294	583.2	0.02618	0.02406	0.02596	0.0276
583.1	0.65664	1.31561	-0.87594	3.4061	583.1	0.02625	0.0241	0.02606	0.0277
583	0.63759	1.17067	-1.19761	3.47714	583	0.02633	0.02415	0.02611	0.02777
582.9	0.54604	1.1486	-1.24271	3.78476	582.9	0.02635	0.02421	0.02617	0.02787
582.8	0.633	0.98835	-1.31769	3.57824	582.8	0.02639	0.02429	0.02624	0.02799
582.7	0.95624	0.72957	-1.26062	3.80825	582.7	0.02646	0.02435	0.02631	0.02802
582.6	0.90219	0.78211	-1.12704	3.93647	582.6	0.0265	0.0244	0.02637	0.02806
582.5	0.80762	0.96838	-1.03223	4.14825	582.5	0.02649	0.02445	0.02645	0.02811
582.4	0.71266	1.03647	-1.34756	4.05643	582.4	0.02655	0.02451	0.02651	0.02818
582.3	0.64623	0.82131	-1.35398	4.1682	582.3	0.02664	0.02457	0.02657	0.02826
582.2	0.84768	0.87953	-1.39654	4.10399	582.2	0.02671	0.02463	0.02659	0.02831
582.1	0.55313	0.69324	-1.29501	3.90866	582.1	0.02678	0.02469	0.02666	0.02833
582	0.66476	0.8129	-1.69921	4.2292	582	0.02686	0.02473	0.02673	0.0284
581.9	0.51383	1.0989	-1.41905	4.54464	581.9	0.02695	0.02478	0.02681	0.02846
581.8	0.41954	1.09209	-1.3874	4.54462	581.8	0.02701	0.02487	0.02687	0.0285
581.7	0.34977	1.38541	-1.27976	4.68719	581.7	0.02706	0.02495	0.02692	0.02859
581.6	0.16134	1.41993	-1.3027	4.83145	581.6	0.02714	0.02499	0.02697	0.02865
581.5	0.08313	1.38857	-1.17879	5.01929	581.5	0.02717	0.02509	0.02703	0.02873
581.4	0.21622	1.61572	-1.20357	5.24798	581.4	0.0272	0.02517	0.02708	0.02881
581.3	0.24633	1.5611	-0.53816	4.96015	581.3	0.02727	0.02521	0.02712	0.02887
581.2	0.18036	1.54716	-0.57152	4.9662	581.2	0.02731	0.02524	0.02717	0.02891
581.1	-0.16312	1.29382	-0.7662	4.77653	581.1	0.02734	0.02532	0.02721	0.02898
581	-0.27059	1.41757	-0.62753	4.90263	581	0.02738	0.02537	0.02723	0.02905
580.9	-0.02693	1.08433	-0.81233	5.10205	580.9	0.02744	0.02543	0.02727	0.02912
580.8	-0.36291	0.87162	-0.71644	4.99399	580.8	0.0275	0.02548	0.02735	0.02919
580.7	-0.37503	1.23592	-0.52146	4.75018	580.7	0.02755	0.02559	0.02741	0.02923
580.6	-0.64419	1.32873	-0.88061	4.74162	580.6	0.02762	0.02563	0.0275	0.02931
580.5	-0.76505	1.07558	-0.67789	4.9736	580.5	0.0277	0.02571	0.02758	0.02935
580.4	-0.46044	1.14569	-0.26215	5.02447	580.4	0.02778	0.02575	0.02766	0.02939
580.3	-0.38206	1.46392	0.08588	5.4567	580.3	0.02784	0.02583	0.02769	0.0294
580.2	-0.10292	1.67312	-0.09448	5.21662	580.2	0.02791	0.02589	0.0277	0.02945
580.1	-0.17678	1.65527	0.09312	5.36943	580.1	0.02796	0.02595	0.02776	0.02954
580	-0.47412	1.67285	0.09754	5.48005	580	0.02799	0.02601	0.02777	0.02962
579.9	-0.69715	2.04266	0.17848	5.46169	579.9	0.028	0.02607	0.0278	0.02972
579.8	-0.64255	2.16502	0.28292	5.59309	579.8	0.02806	0.02614	0.02781	0.0298
579.7	-0.59684	2.15571	0.60775	5.50784	579.7	0.02809	0.02621	0.02784	0.02988
579.6	-0.54579	2.10012	0.88987	5.31505	579.6	0.02816	0.02627	0.02789	0.02993
579.5	-0.63989	2.30857	1.24317	5.39253	579.5	0.02822	0.02631	0.02788	0.02997
579.4	-0.88715	2.17303	1.33434	5.34689	579.4	0.0283	0.02637	0.02793	0.03005
579.3	-0.95271	2.12548	1.23354	5.57617	579.3	0.02837	0.0264	0.02797	0.03013
579.2	-1.02215	2.1435	1.25802	5.43403	579.2	0.02848	0.02647	0.02804	0.03023
579.1	-1.21551	1.84298	1.48511	5.89352	579.1	0.02854	0.02651	0.0281	0.03025
579	-1.08018	1.81784	1.61631	6.4653	579	0.0286	0.02657	0.02818	0.03032
578.9	-1.14378	1.79632	1.4535	6.25842	578.9	0.02867	0.02665	0.02826	0.03039
578.8	-1.05998	2.27333	1.80573	6.47692	578.8	0.02875	0.02668	0.02835	0.03048
578.7	-1.13806	2.00888	2.05488	6.44993	578.7	0.02884	0.02679	0.02842	0.0306
578.6	-0.98522	1.68307	1.69308	5.98008	578.6	0.02889	0.02685	0.02847	0.03069
578.5	-0.75342	1.75055	1.63662	6.29232	578.5	0.02897	0.02691	0.02852	0.03079
578.4	-0.56219	1.7337	1.50706	6.21446	578.4	0.02903	0.02694	0.02854	0.03086
578.3	-0.35657	1.61241	1.6079	6.20262	578.3	0.02908	0.02704	0.02858	0.03094
578.2	-0.26655	1.70571	1.4874	6.25538	578.2	0.02918	0.02707	0.02866	0.03098
578.1	-0.22535	1.50903	1.9436	6.09004	578.1	0.02927	0.02711	0.02871	0.03102
578	-0.21122	1.90328	1.97373	6.12263	578	0.0293	0.02717	0.02881	0.03108
577.9	-0.00323	2.17806	2.10161	5.76865	577.9	0.02937	0.02724	0.02887	0.03115
577.8	-0.07912	2.48258	2.01318	5.65336	577.8	0.02944	0.02732	0.029	0.03121
577.7	0.10811	2.62812	2.00807	5.70479	577.7	0.02949	0.02741	0.02907	0.0313
577.6	-0.14104	2.7442	1.96686	5.69202	577.6	0.02957	0.02751	0.02918	0.03134
577.5	-0.0324	2.84028	1.96522	5.70093	577.5	0.02963	0.02757	0.02925	0.03142
577.4	0.31146	2.87181	1.93711	5.77154	577.4	0.02969	0.0276	0.02933	0.03151
577.3	0.45698	2.73211	2.16267	5.88409	577.3	0.02977	0.0277	0.0294	0.0316
577.2	0.58643	2.77809	2.18031	5.66409	577.2	0.0298	0.02777	0.02942	0.03173
577.1	0.51212	2.80984	1.92717	5.52227	577.1	0.02986	0.02783	0.02946	0.03178
577	0.38166	2.3209	2.12428	5.09944	577	0.02993	0.0279	0.02954	0.03192
576.9	0.61118	2.05786	2.12984	5.05453	576.9	0.02998	0.02796	0.02963	0.03198
576.8	0.71792	2.14655	2.15092	5.15915	576.8	0.03005	0.02803	0.02969	0.03204
576.7	0.89674	2.44259	2.08734	5.26897	576.7	0.03014	0.0281	0.02983	0.03206
576.6	0.84201	2.09811	2.05449	5.19006	576.6	0.03024	0.02818	0.0299	0.03211
576.5	0.91671	2.05385	2.04641	4.87176	576.5	0.03029	0.02825	0.03002	0.03212
576.4	0.83292	2.16189	1.75614	5.35013	576.4	0.03033	0.02831	0.03012	0.03216
576.3	0.75024	2.51276	1.66702	5.45631	576.3	0.03036	0.02838	0.03022	0.03224
576.2	0.76244	2.27688	1.27198	5.3692	576.2	0.03044	0.02842	0.03035	0.03234
576.1	0.9872	2.36524	1.36188	5.25163	576.1	0.03048	0.02853	0.03045	0.03242
576	0.91201	2.70938	1.42234	5.0444	576	0.03054	0.02864	0.0305	0.03249
575.9	1.27323	2.54144	1.56448	5.19139	575.9	0.03058	0.02874	0.03054	0.03256
575.8	1.51221	2.65664	1.37753	4.79063	575.8	0.03064	0.02883	0.03057	0.03267
575.7	1.54403	2.53867	1.20533	4.68174	575.7	0.03067	0.02887	0.03064	0.03274
575.6	1.37376	2.50694	1.33616	4.81935	575.6	0.03068	0.02893	0.03069	0.03284
575.5	1.34322	2.47551	1.41713	4.86636	575.5	0.03072	0.02899	0.03077	0.0329
575.4	1.4221	2.61838	1.32087	5.11842	575.4	0.03078	0.02903	0.03082	0.03296
575.3	0.90506	2.66185	1.40636	5.31609	575.3	0.0309	0.02907	0.03091	0.03303
575.2	0.60304	2.48662	1.51603	5.27838	575.2	0.03098	0.0291	0.03104	0.03308
575.1	0.64276	2.0975	1.48232	5.09448	575.1	0.03106	0.02916	0.03114	0.03317
575	0.57818	1.9805	1.51196	4.947	575	0.03111	0.02923	0.03125	0.03324
574.9	0.52821	1.94042	1.33518	4.51788	574.9	0.03119	0.02931	0.03132	0.03337
574.8	0.51503	1.9111	1.08698	4.74378	574.8	0.03127	0.02939	0.03142	0.03348
574.7	0.38088	1.53977	1.02167	4.76727	574.7	0.0313	0.02943	0.03149	0.03359
574.6	0.47251	1.41365	1.15408	5.26088	574.6	0.03137	0.02946	0.03151	0.03369
574.5	0.18372	1.6682	0.63991	5.66319	574.5	0.03148	0.02951	0.03149	0.03375
574.4	0.12381	1.80073	0.75103	5.49388	574.4	0.03156	0.02958	0.03154	0.03383
574.3	0.52392	1.5278	0.57791	5.72117	574.3	0.03164	0.02962	0.03162	0.0339
574.2	0.37122	1.16614	0.54919	5.23134	574.2	0.03173	0.02965	0.03166	0.03401
574.1	0.21225	1.22954	0.71973	5.34942	574.1	0.03179	0.02969	0.03172	0.03406
574	-0.08545	1.1307	0.78293	5.26643	574	0.03189	0.02974	0.03179	0.03413
573.9	-0.35499	1.04159	0.80115	5.33379	573.9	0.03195	0.02982	0.0319	0.0342
573.8	-0.37196	0.83923	0.23851	5.48609	573.8	0.03202	0.02989	0.03199	0.03429
573.7	-0.18386	0.78482	0.43535	5.51454	573.7	0.03209	0.02991	0.03206	0.03437
573.6	-0.04746	0.95674	0.52436	5.63195	573.6	0.03214	0.02999	0.03217	0.03445
573.5	-0.06855	0.72817	0.2449	5.71751	573.5	0.03219	0.03006	0.0322	0.03453
573.4	-0.04299	0.62537	0.3856	5.6292	573.4	0.03227	0.03012	0.03226	0.0346
573.3	-0.26704	0.62989	0.48093	5.99715	573.3	0.03231	0.03015	0.03232	0.03473
573.2	0.00234	0.55282	0.31166	5.9009	573.2	0.03238	0.03025	0.03238	0.0348
573.1	-0.08586	0.51377	0.412	5.44672	573.1	0.03249	0.03032	0.03244	0.03497
573	-0.14801	0.57781	0.7517	5.59673	573	0.03254	0.03036	0.03245	0.03502
572.9	-0.15621	0.59971	0.80828	5.77041	572.9	0.03264	0.03041	0.03253	0.03506
572.8	-0.17842	0.22341	0.6879	6.17246	572.8	0.03272	0.03044	0.03264	0.03512
572.7	0.00253	-0.0481	0.6529	5.96711	572.7	0.03282	0.03047	0.03272	0.03518
572.6	-0.1338	-0.2152	0.6154	5.66324	572.6	0.03292	0.03053	0.03282	0.03524
572.5	-0.21736	-0.08648	0.67649	5.60429	572.5	0.03301	0.0306	0.03291	0.03528
572.4	-0.39893	-0.1157	1.03004	5.95551	572.4	0.03316	0.03068	0.03296	0.03537
572.3	-0.13294	0.08304	0.7061	5.78575	572.3	0.03324	0.03073	0.03301	0.03544
572.2	-0.04373	-0.02108	0.9775	5.32259	572.2	0.03327	0.03078	0.03305	0.03551
572.1	0.493	0.1215	0.85198	5.28215	572.1	0.03331	0.03088	0.0331	0.03557
572	0.37025	0.23066	0.87227	5.17131	572	0.03337	0.03097	0.03315	0.03567
571.9	0.12152	0.62055	1.01222	5.18013	571.9	0.03341	0.03104	0.0332	0.0357
571.8	0.10815	0.54729	1.05377	5.38779	571.8	0.0335	0.03111	0.03324	0.03571
571.7	0.3315	0.66025	1.32144	5.97996	571.7	0.03358	0.03114	0.03329	0.03577
571.6	0.46307	0.51372	1.60421	6.22723	571.6	0.03366	0.03117	0.03337	0.03585
571.5	0.26859	0.85555	1.639	6.47061	571.5	0.03379	0.03124	0.03346	0.03589
571.4	0.38646	0.70921	1.79792	5.94328	571.4	0.03388	0.03132	0.03356	0.03597
571.3	0.73195	0.12705	1.85777	5.87451	571.3	0.034	0.03138	0.03368	0.03609
571.2	0.98689	0.03211	1.8788	5.88846	571.2	0.03408	0.03147	0.03382	0.03618
571.1	0.77533	0.39459	1.85233	5.71091	571.1	0.03418	0.03152	0.03389	0.03623
571	0.41675	0.82767	2.05118	6.04786	571	0.03427	0.0316	0.03397	0.03631
570.9	0.53059	0.78012	1.85048	6.25519	570.9	0.03433	0.03167	0.03405	0.03637
570.8	0.46534	0.84569	1.49735	6.5234	570.8	0.03439	0.03176	0.03411	0.03645
570.7	0.75837	0.61803	1.38362	6.22763	570.7	0.03447	0.03186	0.03416	0.0365
570.6	0.94746	0.40237	1.46842	6.46314	570.6	0.03455	0.03194	0.03421	0.03661
570.5	0.62057	0.92558	1.37812	6.51169	570.5	0.03465	0.03201	0.0343	0.03667
570.4	0.61094	1.06579	1.24093	6.16808	570.4	0.03478	0.03208	0.03439	0.03672
570.3	0.46027	1.08824	1.31999	6.14936	570.3	0.0349	0.03215	0.03446	0.03682
570.2	0.42906	1.12117	1.11153	6.28104	570.2	0.03499	0.03219	0.03455	0.03694
570.1	0.53247	1.22532	1.0565	6.17397	570.1	0.03509	0.03227	0.03461	0.037
570	0.66466	1.15919	0.91163	6.19649	570	0.0352	0.03233	0.03468	0.03707
569.9	0.67004	1.19191	0.26921	6.29715	569.9	0.0353	0.03243	0.0348	0.03717
569.8	0.93527	0.97688	0.34995	6.57318	569.8	0.03543	0.03253	0.03492	0.03723
569.7	0.82512	0.65992	0.35682	6.83948	569.7	0.03549	0.03264	0.03502	0.03733
569.6	1.06174	1.02	0.71421	6.74836	569.6	0.03559	0.03272	0.03508	0.03742
569.5	0.98409	1.14561	0.33622	6.64496	569.5	0.03566	0.03281	0.03517	0.03755
569.4	1.15363	1.38264	0.43225	6.61913	569.4	0.03572	0.03288	0.03526	0.03763
569.3	0.76997	1.58589	0.37051	6.95855	569.3	0.03581	0.03293	0.03535	0.03771
569.2	0.69272	1.46566	-0.03091	6.8116	569.2	0.03589	0.03301	0.0354	0.03778
569.1	1.04318	1.32312	-0.2484	6.69292	569.1	0.03596	0.03309	0.03549	0.03785
569	1.12378	1.2565	-0.4018	7.06209	569	0.03603	0.03319	0.03559	0.03794
568.9	1.04654	1.55048	-0.41683	6.97435	568.9	0.03613	0.03328	0.03568	0.03803
568.8	0.78956	1.69372	-0.6401	7.41528	568.8	0.03623	0.03335	0.03575	0.03815
568.7	1.0472	1.75537	-0.57304	7.6996	568.7	0.0363	0.03342	0.03583	0.03826
568.6	1.03402	1.4611	-0.85664	7.79949	568.6	0.03639	0.03349	0.03591	0.03842
568.5	1.06118	1.55947	-0.98568	7.89743	568.5	0.0365	0.03358	0.03601	0.03857
568.4	1.16159	1.3294	-1.39962	7.58039	568.4	0.0366	0.03366	0.0361	0.03866
568.3	1.07195	1.52178	-1.53059	7.82655	568.3	0.03668	0.03377	0.03619	0.03882
568.2	1.05233	1.3186	-1.4478	7.90847	568.2	0.03672	0.03384	0.03626	0.03887
568.1	1.19225	1.29693	-1.25344	7.91009	568.1	0.03678	0.03394	0.03633	0.03903
568	0.82145	1.28458	-1.09258	8.40282	568	0.03687	0.03404	0.0364	0.03909
567.9	0.77773	1.42646	-1.04179	8.12742	567.9	0.0369	0.0341	0.03645	0.03916
567.8	0.84865	1.48012	-0.96869	8.28084	567.8	0.03699	0.0342	0.03653	0.03928
567.7	0.97573	1.44167	-0.82698	8.08516	567.7	0.03705	0.03429	0.03662	0.03934
567.6	1.10869	1.75267	-0.99625	7.6828	567.6	0.03713	0.03436	0.03671	0.03943
567.5	1.33739	1.43987	-1.2903	7.88791	567.5	0.03725	0.03445	0.03681	0.03957
567.4	1.34849	2.06567	-0.96591	7.78255	567.4	0.03732	0.03451	0.03689	0.0397
567.3	1.2158	2.11628	-1.14323	7.88644	567.3	0.03741	0.03458	0.037	0.03979
567.2	1.44352	2.11384	-1.10944	7.76401	567.2	0.03743	0.03471	0.03707	0.0399
567.1	1.56295	2.03154	-1.1111	7.8725	567.1	0.03753	0.03484	0.03719	0.04004
567	1.53425	1.72735	-1.20504	7.96801	567	0.03757	0.03496	0.03728	0.04017
566.9	1.4723	1.38251	-0.47131	7.92647	566.9	0.03766	0.03506	0.03735	0.04026
566.8	1.64732	1.42845	-0.72199	8.42237	566.8	0.03773	0.03516	0.03743	0.04034
566.7	1.79099	1.03999	-0.78036	8.5561	566.7	0.03785	0.03526	0.03752	0.04046
566.6	1.38011	1.26939	-0.44609	8.34377	566.6	0.03793	0.03534	0.03759	0.04052
566.5	1.41742	1.24466	-0.40592	8.3708	566.5	0.03799	0.03537	0.0376	0.04056
566.4	1.239	1.57256	-0.33984	8.1446	566.4	0.03805	0.03539	0.03765	0.04066
566.3	1.42582	1.88297	-0.39704	8.03437	566.3	0.03816	0.03544	0.03774	0.04073
566.2	1.25212	1.85997	-0.18309	7.74601	566.2	0.03824	0.03547	0.03781	0.04083
566.1	1.08701	1.6875	-0.1036	7.54138	566.1	0.0383	0.03554	0.03791	0.04094
566	0.86931	1.87862	-0.01291	7.73113	566	0.03843	0.0356	0.03799	0.04109
565.9	1.26186	1.84195	-0.0724	7.78429	565.9	0.03851	0.03571	0.03808	0.04125
565.8	1.10898	2.04474	0.05232	7.85403	565.8	0.0386	0.03579	0.03816	0.04141
565.7	0.95554	2.26867	-0.03469	7.68448	565.7	0.03867	0.03589	0.03827	0.04152
565.6	0.78069	2.17829	0.10181	7.27539	565.6	0.03875	0.03601	0.03836	0.04159
565.5	0.56741	2.04694	-0.16203	7.44935	565.5	0.03885	0.03613	0.03844	0.0417
565.4	0.78712	1.67215	-0.18828	7.31684	565.4	0.03892	0.03623	0.03851	0.04181
565.3	0.85113	1.83815	0.02947	6.81835	565.3	0.03902	0.0363	0.0386	0.04184
565.2	0.93983	2.17393	0.31052	6.55078	565.2	0.03912	0.03637	0.03867	0.04184
565.1	1.26905	2.46298	0.71911	6.25751	565.1	0.03917	0.03642	0.03874	0.0419
565	1.47667	2.30918	0.89086	6.17449	565	0.03925	0.03649	0.03881	0.04194
564.9	1.6489	2.06629	0.39609	6.05571	564.9	0.03931	0.03655	0.03886	0.04199
564.8	1.73491	2.50741	0.17713	5.34327	564.8	0.03942	0.03664	0.03895	0.04209
564.7	2.10701	2.67401	-0.15304	5.01745	564.7	0.03952	0.03671	0.03906	0.04217
564.6	2.03831	2.68245	-0.17656	4.84379	564.6	0.03959	0.03678	0.03916	0.04232
564.5	1.86899	2.81351	-0.08642	4.79371	564.5	0.0397	0.03688	0.03924	0.04243
564.4	1.76472	2.69327	0.03183	4.63644	564.4	0.03977	0.03696	0.03934	0.04255
564.3	1.48121	2.52842	-0.05223	4.66093	564.3	0.03986	0.03706	0.03941	0.04266
564.2	1.44793	2.68222	0.04392	4.53032	564.2	0.03993	0.03721	0.03949	0.04274
564.1	1.4221	2.65428	0.26317	4.29338	564.1	0.04	0.03735	0.03957	0.04278
564	1.42284	2.8741	0.28186	4.09577	564	0.04009	0.03747	0.03969	0.04279
563.9	1.34608	2.67701	0.28813	4.04234	563.9	0.04021	0.03755	0.03979	0.04286
563.8	1.60745	2.4325	0.18173	4.01761	563.8	0.0403	0.03763	0.03987	0.04291
563.7	1.50239	2.56918	0.44373	4.05905	563.7	0.04038	0.03768	0.03995	0.04298
563.6	1.16767	2.72445	0.05192	4.34539	563.6	0.04048	0.03772	0.04003	0.04302
563.5	1.26151	2.93277	0.06925	4.06406	563.5	0.04057	0.03779	0.04012	0.04314
563.4	1.24317	2.72945	0.50095	3.87737	563.4	0.04069	0.03786	0.04021	0.04324
563.3	1.05563	2.56745	0.72933	4.07786	563.3	0.04078	0.03795	0.04031	0.04337
563.2	1.09203	2.86043	1.03504	4.1709	563.2	0.04088	0.03802	0.04044	0.04352
563.1	1.09479	2.53184	1.45511	4.4161	563.1	0.04096	0.03816	0.04054	0.04367
563	0.87871	2.28452	1.16926	4.45112	563	0.04104	0.03825	0.04064	0.04382
562.9	0.66136	1.96133	0.76837	4.77495	562.9	0.04113	0.03841	0.04073	0.04393
562.8	0.78984	1.99239	0.70279	5.17378	562.8	0.04124	0.0385	0.04082	0.044
562.7	0.85074	2.04592	0.44668	5.2475	562.7	0.04127	0.03867	0.04092	0.04406
562.6	0.77224	2.25425	0.61804	5.39969	562.6	0.04132	0.03878	0.04099	0.0441
562.5	0.71852	1.99518	0.82927	5.1311	562.5	0.04142	0.03893	0.04112	0.04419
562.4	0.79787	1.91296	1.27084	5.6017	562.4	0.04151	0.03901	0.04122	0.04425
562.3	0.80635	2.18572	1.53726	6.06441	562.3	0.04161	0.03907	0.0413	0.04439
562.2	1.01442	2.45817	1.68558	5.95565	562.2	0.04171	0.03915	0.04138	0.0445
562.1	1.08012	2.41079	1.72717	6.27078	562.1	0.04184	0.03922	0.04149	0.04458
562	1.15607	2.25027	1.90916	6.41078	562	0.04197	0.03929	0.04157	0.04474
561.9	1.21976	2.30859	1.81609	6.66414	561.9	0.04205	0.0394	0.04165	0.04492
561.8	1.13032	2.19477	1.68065	7.03016	561.8	0.04217	0.0395	0.04178	0.04505
561.7	0.65213	1.97723	1.83748	7.23372	561.7	0.04231	0.03963	0.04188	0.0452
561.6	0.47067	2.00714	2.32883	7.44461	561.6	0.04246	0.03976	0.04201	0.04532
561.5	0.21392	2.03787	2.32974	8.22726	561.5	0.04257	0.03988	0.04211	0.04544
561.4	0.13334	2.28003	2.66255	8.61122	561.4	0.04268	0.04001	0.04223	0.04553
561.3	0.1948	2.15797	2.2375	8.43578	561.3	0.04283	0.04012	0.04236	0.04564
561.2	0.20214	1.60102	2.48294	8.80511	561.2	0.04294	0.04021	0.04244	0.04574
561.1	0.37766	1.47047	2.51682	9.23453	561.1	0.04301	0.04031	0.04253	0.04582
561	0.81484	1.3891	3.10427	9.62651	561	0.04312	0.04038	0.04264	0.04592
560.9	1.08334	1.1197	2.70014	9.82304	560.9	0.04322	0.04043	0.04272	0.04604
560.8	0.88989	0.92618	2.5534	10.7486	560.8	0.04334	0.04045	0.04278	0.04619
560.7	0.56941	0.8632	2.94928	10.9967	560.7	0.04346	0.0405	0.04284	0.0464
560.6	0.63752	0.94845	2.90583	11.0333	560.6	0.04358	0.04058	0.04294	0.04653
560.5	0.51748	1.15582	3.0016	11.2114	560.5	0.04374	0.04065	0.04303	0.04666
560.4	0.3722	1.46471	2.88493	10.9754	560.4	0.04384	0.04073	0.04314	0.04684
560.3	0.71087	1.18173	2.95978	10.8291	560.3	0.04397	0.04089	0.04331	0.04701
560.2	0.32468	1.90197	2.74962	11.1735	560.2	0.04404	0.04103	0.04343	0.04712
560.1	0.60075	2.27887	2.15913	11.1119	560.1	0.04411	0.04112	0.04351	0.04722
560	0.63035	1.74248	1.7728	11.3078	560	0.04419	0.04122	0.04365	0.04727
559.9	0.56883	1.98889	1.31044	11.8291	559.9	0.04429	0.04135	0.04377	0.04736
559.8	0.39002	2.23805	1.19244	11.7909	559.8	0.04439	0.04147	0.04388	0.04745
559.7	0.32609	2.30295	1.24831	11.8023	559.7	0.04451	0.04153	0.04398	0.04752
559.6	0.32193	2.49079	1.53102	11.6086	559.6	0.04463	0.04165	0.04402	0.04766
559.5	0.51677	2.5817	1.41139	11.334	559.5	0.04476	0.04172	0.0441	0.04782
559.4	0.4234	2.57728	1.51719	11.4166	559.4	0.04493	0.04177	0.04416	0.04797
559.3	0.39565	2.42355	1.50641	11.2367	559.3	0.04509	0.04185	0.04428	0.04808
559.2	0.37736	2.88512	1.31391	11.2489	559.2	0.04523	0.04195	0.04438	0.04821
559.1	0.30194	2.93073	1.11281	10.911	559.1	0.04534	0.04203	0.04452	0.04833
559	0.26384	2.94399	0.82613	10.5911	559	0.04548	0.04218	0.0447	0.04846
558.9	0.28384	2.6413	0.57921	10.7379	558.9	0.04556	0.04227	0.04481	0.04857
558.8	-0.10357	2.69201	1.34682	10.6921	558.8	0.04563	0.04238	0.045	0.04868
558.7	-0.26523	2.64411	0.87364	10.3841	558.7	0.04573	0.04249	0.04512	0.04879
558.6	-0.05307	2.37988	0.79408	10.5934	558.6	0.04585	0.04266	0.04526	0.04893
558.5	-0.3145	2.69653	0.67246	10.5479	558.5	0.04591	0.04281	0.04538	0.04906
558.4	-0.28649	2.71653	0.50623	10.5397	558.4	0.04599	0.04288	0.04547	0.04916
558.3	-0.07567	2.54075	0.81604	10.575	558.3	0.04611	0.04297	0.04557	0.04927
558.2	-0.19757	2.1785	0.44704	10.5661	558.2	0.04624	0.04304	0.04566	0.04937
558.1	0.02534	1.85424	0.69466	10.7967	558.1	0.04633	0.04312	0.04574	0.04949
558	0.3932	2.01289	0.81665	10.9103	558	0.04641	0.04319	0.04587	0.0496
557.9	0.35154	2.34617	0.43518	10.3702	557.9	0.04655	0.0433	0.04597	0.04971
557.8	0.63389	2.37633	0.54235	10.5087	557.8	0.0467	0.04339	0.04606	0.04982
557.7	0.18472	2.05625	0.63216	10.6384	557.7	0.04681	0.04349	0.04613	0.04989
557.6	0.42157	2.43684	0.82387	10.3073	557.6	0.0469	0.04359	0.0463	0.05001
557.5	0.54861	2.54687	0.83173	9.69593	557.5	0.04698	0.0437	0.04645	0.05012
557.4	0.93203	2.70208	0.98135	9.74447	557.4	0.04705	0.04386	0.04655	0.05023
557.3	0.39638	2.78262	0.91835	9.6206	557.3	0.04714	0.04398	0.04668	0.05032
557.2	0.48755	2.96901	1.07193	9.33758	557.2	0.04723	0.0441	0.04682	0.05041
557.1	0.89635	2.81741	1.25556	9.61072	557.1	0.04732	0.0442	0.04689	0.05049
557	0.82391	2.57247	1.03005	9.3979	557	0.04739	0.04429	0.04698	0.05059
556.9	1.00113	2.00618	0.75984	9.22137	556.9	0.04753	0.04434	0.04709	0.05073
556.8	0.90378	1.52356	1.27765	9.38204	556.8	0.04764	0.04445	0.04719	0.05085
556.7	0.74744	1.80399	1.60003	9.55649	556.7	0.04778	0.04457	0.04726	0.05105
556.6	1.23838	1.71328	1.86983	8.55602	556.6	0.04794	0.0446	0.04733	0.05121
556.5	1.10419	1.99767	1.65767	8.4717	556.5	0.04809	0.04474	0.04742	0.05134
556.4	1.35654	2.26814	1.70037	8.52679	556.4	0.04823	0.04486	0.04753	0.05147
556.3	1.39188	2.62793	1.28476	8.19156	556.3	0.04836	0.04494	0.04768	0.05158
556.2	1.02804	2.63149	1.32015	8.22912	556.2	0.04847	0.04509	0.04785	0.0517
556.1	0.95772	2.84463	1.31237	8.02383	556.1	0.04856	0.04522	0.04801	0.05179
556	1.3688	2.03947	1.47669	8.56449	556	0.04863	0.04532	0.04813	0.05187
555.9	1.23596	1.59785	1.04029	9.07759	555.9	0.04875	0.04542	0.04824	0.05198
555.8	1.36462	1.81441	1.27015	9.64129	555.8	0.04889	0.04557	0.04832	0.05205
555.7	1.01078	2.09661	1.58074	9.78086	555.7	0.04899	0.04567	0.04842	0.05215
555.6	1.21618	1.97358	1.67792	9.47324	555.6	0.04913	0.04577	0.04854	0.05225
555.5	1.33205	2.11658	0.95409	9.66259	555.5	0.04928	0.04588	0.04863	0.05239
555.4	1.19587	2.22979	1.11454	10.1966	555.4	0.0494	0.04597	0.04873	0.0525
555.3	1.12831	2.87573	1.0294	10.2437	555.3	0.04952	0.04605	0.04881	0.05261
555.2	1.31397	2.51345	1.03987	10.0444	555.2	0.04963	0.04606	0.04891	0.05274
555.1	1.41948	2.66659	0.98563	10.5459	555.1	0.04973	0.04611	0.04902	0.0529
555	1.45506	2.60017	0.69436	10.2107	555	0.04982	0.04619	0.04912	0.05305
554.9	1.56904	2.8039	0.73207	9.87278	554.9	0.04993	0.04631	0.04924	0.05317
554.8	1.57755	2.91922	0.56323	10.0671	554.8	0.05004	0.04646	0.04934	0.0533
554.7	1.58762	3.44197	0.60426	10.0183	554.7	0.05018	0.0466	0.04941	0.05345
554.6	1.48343	3.26526	0.56488	10.5254	554.6	0.05029	0.04672	0.04953	0.05359
554.5	1.46168	3.44573	0.35739	10.6037	554.5	0.05044	0.04686	0.04967	0.05375
554.4	1.50006	3.40195	0.46287	10.355	554.4	0.05059	0.04695	0.04979	0.05394
554.3	1.49079	3.67261	0.40924	10.8458	554.3	0.05074	0.04705	0.04988	0.05413
554.2	1.41955	3.48644	0.42349	11.0708	554.2	0.05092	0.04713	0.04996	0.05427
554.1	1.39782	3.31524	0.08732	11.0227	554.1	0.05107	0.04721	0.05009	0.05435
554	1.76955	3.28427	0.10222	11.0182	554	0.05119	0.04731	0.05018	0.05451
553.9	1.7055	2.97383	0.08572	11.1888	553.9	0.05132	0.04742	0.05027	0.05468
553.8	1.37536	3.0167	-0.36611	11.2152	553.8	0.05147	0.04754	0.05041	0.05481
553.7	1.82299	3.76638	-0.27909	11.8223	553.7	0.05164	0.04769	0.05055	0.05494
553.6	1.96384	3.95567	0.35677	11.7056	553.6	0.05176	0.04787	0.05071	0.05503
553.5	2.21806	4.69964	0.02182	11.5439	553.5	0.05194	0.04797	0.05086	0.05516
553.4	2.20336	4.94328	0.09177	11.5649	553.4	0.05206	0.04806	0.05096	0.05526
553.3	1.94899	4.90951	-0.10197	12.5067	553.3	0.05218	0.04819	0.05107	0.05538
553.2	2.2262	4.58043	0.14491	12.6893	553.2	0.05228	0.04827	0.05117	0.0555
553.1	2.62831	4.42747	0.0763	12.2806	553.1	0.05235	0.04837	0.05127	0.05567
553	2.73909	3.88259	0.37707	13.0747	553	0.05247	0.04848	0.0514	0.05583
552.9	2.80432	4.17303	0.80112	13.4804	552.9	0.0526	0.04862	0.05154	0.05599
552.8	3.07933	3.88625	0.42092	13.0365	552.8	0.05273	0.04874	0.05165	0.05616
552.7	2.95803	4.06647	0.00694	12.8734	552.7	0.05288	0.04888	0.05177	0.05631
552.6	2.87117	4.35058	0.33424	12.5878	552.6	0.05305	0.04902	0.0519	0.0565
552.5	2.95048	4.45141	0.68029	12.4993	552.5	0.05319	0.04913	0.05199	0.0567
552.4	3.09599	3.93339	0.4678	12.9277	552.4	0.05334	0.04926	0.05209	0.0569
552.3	2.71453	4.00165	0.48063	13.2865	552.3	0.05346	0.04936	0.0522	0.0571
552.2	2.76611	3.91793	0.87835	13.5026	552.2	0.05357	0.04948	0.05227	0.05721
552.1	3.12403	3.662	0.62389	13.5262	552.1	0.05373	0.04958	0.05239	0.05734
552	3.33619	3.573	0.8684	13.4649	552	0.05384	0.0497	0.05247	0.05746
551.9	3.38367	3.77337	1.06503	13.4626	551.9	0.05395	0.04986	0.05258	0.05759
551.8	3.31793	3.9656	1.07996	13.125	551.8	0.0541	0.05003	0.05271	0.05771
551.7	3.36834	3.90065	0.95866	13.1438	551.7	0.05424	0.05018	0.05286	0.05783
551.6	3.14893	4.13872	0.63512	13.432	551.6	0.05439	0.0503	0.05301	0.058
551.5	3.03486	4.1599	0.53801	13.0276	551.5	0.05455	0.05041	0.05316	0.05816
551.4	3.13709	3.84154	0.94066	13.1915	551.4	0.05468	0.0505	0.05338	0.05833
551.3	2.92205	3.90125	1.13228	13.2914	551.3	0.05482	0.05059	0.05357	0.0585
551.2	2.72584	3.71692	1.15449	13.0069	551.2	0.05494	0.05071	0.05373	0.05865
551.1	2.40051	3.71762	0.9	12.9783	551.1	0.05506	0.05087	0.05389	0.05881
551	2.52966	4.02148	0.92285	12.4459	551	0.0552	0.05101	0.05402	0.05894
550.9	2.18645	3.92371	0.54504	12.2526	550.9	0.05535	0.05118	0.05418	0.05907
550.8	1.79725	4.17243	0.90233	12.7864	550.8	0.05553	0.05136	0.05431	0.05927
550.7	1.87898	4.5606	1.14658	12.3161	550.7	0.05565	0.05149	0.0544	0.05941
550.6	1.72667	5.0063	1.222	12.3819	550.6	0.05582	0.05161	0.05449	0.05953
550.5	1.58908	4.96579	0.55274	11.959	550.5	0.05595	0.05171	0.05457	0.05968
550.4	1.20252	4.69472	0.76769	11.677	550.4	0.05609	0.05181	0.05468	0.05981
550.3	1.31764	4.9035	0.25666	11.8444	550.3	0.05617	0.0519	0.05479	0.05995
550.2	1.40965	4.58043	0.58472	11.8176	550.2	0.05623	0.05203	0.05494	0.0601
550.1	1.77025	4.35223	0.83332	11.4828	550.1	0.05634	0.05214	0.05514	0.06022
550	1.52091	4.18708	0.37802	11.2178	550	0.05643	0.05226	0.05537	0.06034
549.9	1.19959	3.9408	0.31345	11.3979	549.9	0.05657	0.05241	0.05556	0.06053
549.8	1.31624	3.91044	0.13937	11.3075	549.8	0.05668	0.05255	0.05575	0.06064
549.7	1.3244	3.90446	-0.05696	11.2173	549.7	0.05684	0.0527	0.05591	0.06081
549.6	1.36978	3.57383	-0.28073	11.1974	549.6	0.05697	0.05278	0.05598	0.06095
549.5	1.39324	3.60932	0.10499	11.4715	549.5	0.05708	0.05293	0.05606	0.06115
549.4	1.50466	3.73534	-0.0057	11.3012	549.4	0.0572	0.05303	0.05612	0.06127
549.3	1.12858	3.44242	-0.74035	11.2149	549.3	0.05731	0.05314	0.0562	0.06137
549.2	1.17396	3.32649	-1.02056	10.943	549.2	0.05743	0.05327	0.0563	0.06145
549.1	1.51362	3.12005	-0.66656	11.4063	549.1	0.05756	0.05343	0.05649	0.06156
549	1.71618	3.70528	-0.55949	10.4373	549	0.05773	0.05357	0.05662	0.0617
548.9	1.30789	3.77571	-0.53667	10.189	548.9	0.05785	0.05371	0.05681	0.06182
548.8	1.10507	3.77946	-0.23934	9.91304	548.8	0.05796	0.05383	0.05699	0.06198
548.7	1.24179	3.75506	-0.73068	9.69242	548.7	0.05813	0.05397	0.05726	0.06218
548.6	1.01836	3.82199	-0.51274	10.0748	548.6	0.05824	0.05405	0.05744	0.06238
548.5	1.11327	4.20052	-0.49953	9.92702	548.5	0.05835	0.05419	0.05756	0.06254
548.4	1.047	4.18174	-0.05354	10.21	548.4	0.05851	0.05429	0.05771	0.06267
548.3	1.01877	4.68884	0.04973	10.0886	548.3	0.05864	0.05442	0.0578	0.06279
548.2	0.78731	4.58509	-0.14713	10.0533	548.2	0.05878	0.05457	0.05786	0.06293
548.1	0.69552	4.68509	-0.50605	9.96266	548.1	0.05889	0.05473	0.05791	0.06306
548	1.29491	4.89654	-0.30341	10.5915	548	0.05901	0.05487	0.05798	0.06321
547.9	1.73227	5.15828	-0.53541	10.9721	547.9	0.05917	0.05506	0.05811	0.06333
547.8	1.73889	4.46609	-0.65947	11.1237	547.8	0.0593	0.05517	0.05823	0.06342
547.7	1.85731	4.38017	-0.50038	11.3912	547.7	0.05943	0.0553	0.05835	0.06354
547.6	1.84955	4.22819	-0.44098	11.451	547.6	0.05957	0.05541	0.05855	0.06371
547.5	1.60637	4.83773	-0.3255	11.2898	547.5	0.05973	0.05553	0.05878	0.06384
547.4	1.34735	4.86408	-0.28432	11.9355	547.4	0.0599	0.05565	0.05899	0.06399
547.3	1.59393	4.41208	-0.14682	11.7914	547.3	0.06001	0.05576	0.05919	0.06417
547.2	1.57142	4.32504	0.23973	12.6716	547.2	0.06016	0.05586	0.05935	0.06437
547.1	1.08912	4.37599	0.75733	12.7076	547.1	0.06027	0.05598	0.05949	0.06457
547	0.73755	4.38138	0.42824	13.0298	547	0.06047	0.05619	0.05967	0.06478
546.9	0.62055	4.79597	0.38178	13.4529	546.9	0.06065	0.05637	0.05977	0.06496
546.8	0.62157	4.62077	0.21631	13.2892	546.8	0.06078	0.05655	0.05985	0.06511
546.7	0.97295	4.74332	0.36498	13.1667	546.7	0.06096	0.05673	0.05994	0.06523
546.6	0.43864	4.88422	0.47225	12.9196	546.6	0.06113	0.05687	0.06008	0.06537
546.5	0.03128	4.74921	0.30679	13.1961	546.5	0.06132	0.05703	0.06024	0.06553
546.4	0.2325	5.15745	0.36183	13.0587	546.4	0.06152	0.05721	0.06041	0.06573
546.3	0.02862	5.465	0.9484	12.9625	546.3	0.0617	0.05733	0.06062	0.06587
546.2	-0.10428	5.66906	1.22489	13.533	546.2	0.06189	0.05741	0.06087	0.06604
546.1	-0.05042	6.01212	1.41494	13.6098	546.1	0.06211	0.05755	0.06117	0.0662
546	0.4391	6.22082	1.00014	12.9456	546	0.06226	0.05764	0.06137	0.06639
545.9	-0.03577	6.16952	0.75677	12.6486	545.9	0.06244	0.05776	0.0615	0.06658
545.8	0.0772	5.85635	0.61515	13.3082	545.8	0.06252	0.05789	0.06165	0.06673
545.7	0.10722	5.80779	0.78196	13.6397	545.7	0.06264	0.05806	0.06177	0.06696
545.6	0.32144	6.06009	0.32511	13.8315	545.6	0.06278	0.05821	0.0619	0.06713
545.5	-0.11185	5.67894	0.57149	13.9049	545.5	0.06294	0.05834	0.06197	0.06727
545.4	-0.13513	5.59618	0.17206	13.7145	545.4	0.06314	0.05851	0.06204	0.06739
545.3	-0.25033	5.93915	0.10008	13.4688	545.3	0.06332	0.05863	0.06216	0.06754
545.2	0.27264	5.17453	-0.08803	13.6545	545.2	0.06351	0.05878	0.06228	0.06772
545.1	-0.13146	5.31516	-0.07039	13.5183	545.1	0.06367	0.05893	0.06243	0.06787
545	-0.17981	5.35389	0.07852	13.8155	545	0.06384	0.05907	0.06267	0.06801
544.9	-0.13909	5.12551	0.1686	14.279	544.9	0.06404	0.0592	0.06292	0.06813
544.8	-0.46681	5.03871	0.12556	13.5058	544.8	0.06423	0.0593	0.06314	0.0683
544.7	-0.2849	4.66403	0.25016	13.2701	544.7	0.06445	0.0595	0.06342	0.06851
544.6	-0.88719	4.65706	0.56039	13.148	544.6	0.0646	0.05963	0.06357	0.06871
544.5	-0.6278	5.27262	0.45202	13.3661	544.5	0.06478	0.05984	0.06371	0.06894
544.4	-0.74682	5.28821	0.55076	13.0954	544.4	0.06495	0.05999	0.06384	0.0691
544.3	-0.50045	4.75555	0.8268	13.0007	544.3	0.06507	0.06014	0.0639	0.0693
544.2	-0.23625	4.76281	0.1792	12.6996	544.2	0.06524	0.06032	0.06399	0.06951
544.1	-0.00287	4.45937	-0.14212	13.3804	544.1	0.06536	0.06054	0.06411	0.06968
544	0.21422	4.9533	-0.40059	12.6546	544	0.06554	0.06074	0.06431	0.06985
543.9	0.82566	4.99592	-0.92734	13.0129	543.9	0.06571	0.06095	0.06447	0.06997
543.8	0.86528	5.04208	-0.73272	12.609	543.8	0.06587	0.0611	0.06464	0.07013
543.7	0.96321	4.43425	-0.42727	12.4785	543.7	0.066	0.06123	0.06481	0.07029
543.6	1.12213	4.61007	-0.35749	12.1028	543.6	0.06618	0.06135	0.06496	0.07046
543.5	1.28938	4.65495	-0.52371	12.9345	543.5	0.06638	0.06147	0.06515	0.07062
543.4	1.48836	4.7931	-0.51514	12.8358	543.4	0.06656	0.06158	0.06535	0.07079
543.3	1.53363	4.88844	-0.86341	12.9619	543.3	0.06677	0.06168	0.06548	0.071
543.2	2.06663	4.92887	-0.90421	12.8459	543.2	0.06692	0.06182	0.06563	0.0711
543.1	2.17249	4.86158	-1.01347	12.6984	543.1	0.06705	0.06198	0.06582	0.07124
543	1.97516	4.64348	-1.75581	12.7363	543	0.06721	0.06217	0.06596	0.07142
542.9	2.07978	4.46975	-1.0675	12.7657	542.9	0.06736	0.06238	0.06608	0.07167
542.8	1.6179	4.51791	-0.80426	12.7301	542.8	0.0675	0.06253	0.06621	0.07194
542.7	1.74537	4.52837	-0.53115	13.2709	542.7	0.06765	0.06273	0.06638	0.07215
542.6	1.96537	4.95492	-0.10532	13.0364	542.6	0.06779	0.06286	0.06658	0.07235
542.5	1.62034	5.18256	-0.50806	13.0713	542.5	0.06792	0.06298	0.06672	0.07253
542.4	2.30843	5.43419	-1.02075	13.0605	542.4	0.06815	0.06314	0.06691	0.07273
542.3	2.32815	4.59126	-0.98222	12.9538	542.3	0.06838	0.06325	0.06712	0.0729
542.2	2.59488	4.54039	-0.50784	12.8124	542.2	0.06862	0.06343	0.06733	0.0731
542.1	2.59698	4.27577	-0.51223	12.617	542.1	0.06881	0.06361	0.06757	0.07329
542	3.1609	4.3582	-0.13713	13.1163	542	0.06899	0.06383	0.06773	0.07347
541.9	2.96786	4.45368	-0.6447	12.8735	541.9	0.06915	0.06398	0.06787	0.0737
541.8	2.92149	4.31821	-0.77472	13.1293	541.8	0.06927	0.06414	0.06802	0.07389
541.7	2.73787	4.04136	-0.7232	13.1104	541.7	0.0694	0.06431	0.06813	0.07409
541.6	2.72146	4.25396	-0.99476	13.3385	541.6	0.06954	0.06444	0.06824	0.07431
541.5	2.58939	4.08878	-0.96801	13.5313	541.5	0.06965	0.06459	0.06835	0.07447
541.4	3.03545	3.73782	-0.96375	13.3319	541.4	0.06977	0.06473	0.06851	0.07464
541.3	3.13844	4.29729	-1.18454	13.9263	541.3	0.06993	0.06488	0.0686	0.07481
541.2	2.90519	4.28782	-0.87591	13.8508	541.2	0.0701	0.06501	0.06873	0.07497
541.1	2.98937	4.53826	-0.85253	13.4	541.1	0.07025	0.06513	0.06888	0.07509
541	3.44905	4.51	-0.98749	13.8422	541	0.07042	0.06528	0.06906	0.07525
540.9	3.2427	4.28548	-1.21564	14.3362	540.9	0.07063	0.06542	0.06926	0.07542
540.8	3.23725	4.05682	-1.07187	14.0723	540.8	0.07084	0.06554	0.06941	0.07557
540.7	2.77683	3.71093	-0.83027	14.4624	540.7	0.07105	0.06563	0.06957	0.07576
540.6	2.59506	3.51896	-0.47908	14.1405	540.6	0.0712	0.0657	0.06973	0.07593
540.5	2.55184	3.39898	-0.39228	13.7579	540.5	0.07144	0.06585	0.06993	0.07615
540.4	2.34454	3.70685	-0.99524	14.2833	540.4	0.07169	0.06601	0.07014	0.07638
540.3	2.58155	3.80203	-0.82665	14.55	540.3	0.07189	0.06625	0.07032	0.0766
540.2	2.74688	3.7311	-0.72219	14.9632	540.2	0.07203	0.06649	0.0705	0.07678
540.1	2.626	3.59354	-0.10667	14.829	540.1	0.07218	0.0667	0.07062	0.07702
540	2.58096	3.63657	-0.15156	15.4618	540	0.07234	0.06692	0.07074	0.07718
539.9	2.11898	3.65866	0.06336	15.3175	539.9	0.07248	0.06711	0.07086	0.07735
539.8	2.03908	3.27174	0.21508	15.095	539.8	0.07266	0.06727	0.07099	0.07754
539.7	1.78411	2.89219	0.71294	15.4234	539.7	0.07284	0.06737	0.07115	0.0777
539.6	1.78409	3.19976	0.86159	15.2967	539.6	0.07305	0.06747	0.07131	0.07782
539.5	1.80102	3.30843	0.18468	15.5184	539.5	0.07325	0.06757	0.07147	0.07793
539.4	2.00532	3.36343	-0.17277	15.8994	539.4	0.07346	0.06771	0.07167	0.0781
539.3	1.90236	2.70242	-0.25465	15.6803	539.3	0.07371	0.06784	0.07189	0.07827
539.2	2.30462	2.51718	-0.28442	15.9475	539.2	0.07398	0.06806	0.07213	0.07845
539.1	2.49985	1.96237	0.26093	15.7896	539.1	0.07418	0.06825	0.07237	0.07865
539	2.07487	2.0441	0.19615	16.1233	539	0.0743	0.06845	0.07252	0.0788
538.9	1.78228	2.45093	0.20185	15.9178	538.9	0.07447	0.06869	0.07275	0.07898
538.8	1.56313	2.50242	0.08831	16.3226	538.8	0.07458	0.0689	0.0729	0.07914
538.7	1.41128	2.53642	-0.08935	17.0666	538.7	0.07473	0.0691	0.0731	0.07933
538.6	1.33485	2.80196	-0.50603	17.4941	538.6	0.07489	0.06928	0.07328	0.07948
538.5	1.31042	3.20885	-0.6385	17.4996	538.5	0.07506	0.06941	0.07349	0.07963
538.4	1.40755	3.20506	-0.65259	17.8653	538.4	0.07524	0.06956	0.07365	0.07979
538.3	1.49259	3.03264	-0.32347	18.0948	538.3	0.07546	0.0697	0.07382	0.07997
538.2	1.47898	3.0957	-0.11738	17.7385	538.2	0.07567	0.06982	0.07399	0.08019
538.1	1.85312	2.97333	0.09177	17.9959	538.1	0.07591	0.06998	0.07418	0.0804
538	1.32909	3.09493	-0.26414	18.1059	538	0.07616	0.07015	0.07435	0.0806
537.9	0.95827	2.67308	-0.13797	17.9419	537.9	0.07632	0.07032	0.07463	0.08082
537.8	1.34602	2.35357	0.25294	17.9664	537.8	0.07654	0.07052	0.07489	0.08106
537.7	1.49545	2.42196	0.1128	18.5621	537.7	0.07676	0.07072	0.07515	0.0813
537.6	1.14166	1.8256	0.52594	18.0734	537.6	0.07697	0.07092	0.07542	0.08159
537.5	1.11576	2.10207	0.72783	18.7304	537.5	0.07714	0.07108	0.07564	0.0818
537.4	0.9921	2.63183	0.94481	18.9738	537.4	0.07726	0.0713	0.07589	0.08203
537.3	1.33581	2.46978	0.96228	19.0325	537.3	0.07742	0.07146	0.07602	0.08222
537.2	1.43121	2.66359	1.27929	19.4959	537.2	0.07758	0.07162	0.07617	0.08236
537.1	1.81242	2.27977	1.36987	19.5463	537.1	0.07773	0.07175	0.07631	0.0825
537	1.80772	2.5097	0.93752	19.2986	537	0.07791	0.07185	0.07638	0.0826
536.9	1.47453	2.48548	0.60549	18.9605	536.9	0.07811	0.07195	0.07651	0.08273
536.8	1.47546	1.70316	0.17144	18.5983	536.8	0.0783	0.07203	0.07669	0.08294
536.7	1.52397	1.58794	-0.09702	18.3078	536.7	0.07845	0.07217	0.0769	0.08313
536.6	1.70702	1.41152	-0.04538	18.8098	536.6	0.0786	0.07236	0.07706	0.08329
536.5	1.83411	1.47136	-0.3886	19.2409	536.5	0.07877	0.07258	0.07727	0.08346
536.4	1.85647	1.49744	-0.83245	19.6328	536.4	0.07901	0.0728	0.07749	0.08369
536.3	1.94568	1.45671	-1.21699	20.1146	536.3	0.0792	0.07307	0.07771	0.08393
536.2	1.73838	1.65445	-0.88884	19.9973	536.2	0.0794	0.07333	0.07798	0.08416
536.1	1.95413	1.69838	-0.86998	19.8746	536.1	0.07956	0.0736	0.07825	0.08439
536	1.97593	1.38509	-0.20257	20.2926	536	0.07977	0.07386	0.07842	0.08461
535.9	1.83171	1.21785	-0.86562	20.9723	535.9	0.07994	0.07404	0.07854	0.08481
535.8	1.70022	1.86727	-1.38393	20.7742	535.8	0.08006	0.07421	0.07864	0.08499
535.7	2.0605	1.84211	-1.32795	20.6694	535.7	0.08022	0.07431	0.07877	0.08513
535.6	1.81488	1.63621	-0.66257	20.634	535.6	0.08044	0.0744	0.07885	0.08531
535.5	1.75068	1.41664	-0.62125	21.2546	535.5	0.08064	0.07454	0.07898	0.08547
535.4	2.03568	1.44513	-0.55775	20.8859	535.4	0.08085	0.07469	0.07911	0.08566
535.3	2.03057	1.09393	-0.48799	21.0768	535.3	0.08108	0.0749	0.07928	0.08586
535.2	1.88701	0.87122	-0.19266	21.1884	535.2	0.08127	0.07517	0.07947	0.08604
535.1	1.82238	0.90783	0.27836	21.126	535.1	0.08147	0.07541	0.07971	0.08628
535	2.04455	1.00267	0.57772	20.2063	535	0.08169	0.07568	0.07995	0.08652
534.9	2.09556	1.09826	0.49053	20.2589	534.9	0.08193	0.07594	0.08019	0.08672
534.8	2.01713	1.2921	0.75326	20.6174	534.8	0.08212	0.0762	0.0804	0.08689
534.7	2.03826	1.75392	0.59291	20.4067	534.7	0.08238	0.07641	0.08063	0.08713
534.6	2.43006	1.43185	0.64998	20.1358	534.6	0.08259	0.07657	0.08082	0.0874
534.5	2.65041	1.39032	0.42395	21.0499	534.5	0.08278	0.07674	0.08098	0.08766
534.4	1.92303	1.37856	-0.28648	20.7789	534.4	0.083	0.0769	0.0812	0.08792
534.3	2.05905	2.46488	-0.92647	20.7533	534.3	0.08318	0.07703	0.08136	0.08806
534.2	1.99957	1.93135	-0.84873	20.4209	534.2	0.08337	0.07721	0.08152	0.08826
534.1	1.8795	1.70418	-0.91087	20.5933	534.1	0.0836	0.07739	0.08168	0.0884
534	0.89016	1.29073	-0.91674	20.3209	534	0.08386	0.07761	0.08188	0.0886
533.9	0.89174	1.07283	-0.86681	20.2975	533.9	0.08411	0.07786	0.08205	0.08881
533.8	0.5033	0.78071	-0.35057	20.3022	533.8	0.08437	0.07811	0.08226	0.08903
533.7	0.67556	1.17375	0.33136	20.9452	533.7	0.08462	0.07832	0.08255	0.08927
533.6	0.33621	1.29096	0.64387	20.6603	533.6	0.08486	0.07856	0.0828	0.08955
533.5	0.02873	2.08844	1.06801	20.5064	533.5	0.08511	0.07881	0.08302	0.08979
533.4	0.03602	2.18687	1.13968	20.3107	533.4	0.08536	0.07898	0.08325	0.09002
533.3	-0.22358	1.9284	1.05636	20.0592	533.3	0.08558	0.07911	0.08351	0.09031
533.2	0.00203	2.44215	1.09267	19.7065	533.2	0.08583	0.07928	0.08381	0.09064
533.1	0.18872	2.58944	0.6056	19.7232	533.1	0.08598	0.07941	0.08401	0.09084
533	0.00388	2.60121	0.74611	19.6155	533	0.08612	0.07954	0.08418	0.09108
532.9	-0.61304	2.4758	0.65131	20.064	532.9	0.0863	0.07968	0.08433	0.0913
532.8	-0.63654	2.41221	0.34069	19.4435	532.8	0.0865	0.07982	0.08444	0.09153
532.7	-1.07159	2.42261	-0.04682	18.8604	532.7	0.08672	0.08003	0.08462	0.09176
532.6	-1.38191	2.92145	0.83796	18.131	532.6	0.08695	0.08025	0.08484	0.092
532.5	-1.96571	2.69801	1.08978	18.6618	532.5	0.08721	0.08045	0.08508	0.09223
532.4	-2.24873	2.8457	1.08999	19.4519	532.4	0.08746	0.0807	0.08531	0.09245
532.3	-1.95141	2.59679	0.97806	19.7083	532.3	0.08775	0.08096	0.08565	0.09279
532.2	-1.33798	2.87462	0.59278	19.5033	532.2	0.08801	0.08113	0.08588	0.09302
532.1	-1.70265	2.28368	0.56605	19.2745	532.1	0.08819	0.0813	0.08611	0.09326
532	-1.40096	2.56577	0.80451	19.804	532	0.08836	0.08142	0.08632	0.09349
531.9	-1.65578	2.23206	0.5414	19.8102	531.9	0.08854	0.08158	0.0865	0.09366
531.8	-1.47871	1.99371	0.55422	20.9143	531.8	0.08868	0.08173	0.08665	0.09387
531.7	-1.99336	1.94701	1.04298	21.6625	531.7	0.08883	0.08185	0.08679	0.09409
531.6	-2.56455	2.00441	1.04959	21.3396	531.6	0.08897	0.08203	0.08695	0.09428
531.5	-2.56872	1.76687	1.05163	21.6642	531.5	0.0892	0.08225	0.08717	0.0945
531.4	-2.49183	2.22659	1.1983	21.3982	531.4	0.08938	0.08247	0.08735	0.09469
531.3	-1.96661	2.59541	1.59327	21.2781	531.3	0.08958	0.08269	0.08757	0.09485
531.2	-1.25462	3.0274	1.70601	21.2526	531.2	0.08983	0.08293	0.0878	0.09501
531.1	-0.73759	2.55896	2.20247	21.4584	531.1	0.0901	0.08316	0.088	0.09524
531	-0.04647	2.65984	2.73959	21.7543	531	0.09032	0.08337	0.08821	0.09546
530.9	0.15129	2.72317	2.82983	21.2558	530.9	0.09056	0.0836	0.08843	0.09574
530.8	0.86123	3.36753	3.10921	21.324	530.8	0.09078	0.08376	0.08868	0.09596
530.7	0.67424	3.74369	3.02122	20.8709	530.7	0.09096	0.08391	0.08896	0.09626
530.6	0.67483	3.79468	2.62651	20.6899	530.6	0.09119	0.08416	0.08928	0.09661
530.5	0.7565	3.85908	2.1669	20.2726	530.5	0.09136	0.08439	0.08947	0.09688
530.4	0.92048	3.44223	1.61244	20.8075	530.4	0.09158	0.08459	0.08966	0.09708
530.3	0.55084	3.51365	1.26258	21.3151	530.3	0.09177	0.0848	0.0899	0.09735
530.2	0.60774	2.9955	1.71908	21.3337	530.2	0.09199	0.08503	0.09007	0.09753
530.1	0.6284	3.49499	1.62913	21.6505	530.1	0.09225	0.08529	0.09022	0.09771
530	0.84467	3.4594	1.9624	21.8532	530	0.09256	0.08559	0.09037	0.0979
529.9	0.71672	3.76753	2.26342	22.3486	529.9	0.09282	0.08589	0.09052	0.0981
529.8	0.81974	3.48311	2.9019	22.0911	529.8	0.09319	0.08625	0.09075	0.0983
529.7	1.38905	3.92212	1.85864	22.0647	529.7	0.09351	0.0865	0.09099	0.09849
529.6	1.76636	3.9175	2.33976	21.7845	529.6	0.09377	0.08678	0.09122	0.09869
529.5	2.19455	3.92525	2.83128	22.4884	529.5	0.09401	0.08694	0.09146	0.09889
529.4	2.26002	2.70441	2.75344	23.1378	529.4	0.09419	0.08716	0.09163	0.0991
529.3	2.3866	2.44461	2.9477	23.3858	529.3	0.09435	0.0873	0.09181	0.09934
529.2	2.96344	2.87305	3.41357	23.295	529.2	0.09452	0.08749	0.09201	0.09957
529.1	3.74891	3.48932	2.73895	22.8275	529.1	0.09464	0.08771	0.09219	0.09977
529	3.8708	3.95611	3.16718	23.155	529	0.09481	0.08793	0.09241	0.10003
528.9	3.68798	3.90112	3.52741	23.9547	528.9	0.095	0.08818	0.09261	0.10032
528.8	3.65954	4.36855	3.45399	24.2306	528.8	0.09529	0.08856	0.09293	0.10065
528.7	4.00433	4.36938	3.61083	24.4056	528.7	0.09561	0.08886	0.09319	0.10092
528.6	4.20548	4.68389	3.61805	23.8209	528.6	0.09596	0.08917	0.09345	0.10119
528.5	4.36235	5.08847	2.83355	23.5719	528.5	0.09635	0.08947	0.09369	0.10145
528.4	4.32041	5.05163	2.32526	23.808	528.4	0.09669	0.08974	0.09392	0.10171
528.3	3.48698	4.87235	1.74233	23.7732	528.3	0.09696	0.08994	0.09419	0.102
528.2	3.42965	4.67834	1.41359	24.0606	528.2	0.09714	0.09014	0.09445	0.10224
528.1	2.71286	4.67078	1.49512	24.8069	528.1	0.09734	0.09033	0.09468	0.10252
528	2.24711	4.44083	1.92034	24.9465	528	0.09747	0.09056	0.09488	0.10281
527.9	1.46989	4.19535	1.40046	25.1293	527.9	0.09759	0.09078	0.09506	0.10307
527.8	0.38538	4.28811	0.86902	24.4421	527.8	0.09782	0.09107	0.0953	0.10338
527.7	0.26426	3.83848	0.65435	24.6865	527.7	0.09803	0.09128	0.0955	0.10359
527.6	0.27139	3.61351	0.8663	24.8251	527.6	0.09822	0.09157	0.09568	0.1038
527.5	0.77367	2.9261	1.16995	24.7921	527.5	0.09851	0.09189	0.09587	0.10397
527.4	0.98135	2.77211	1.1564	25.1048	527.4	0.0988	0.09218	0.09605	0.10411
527.3	0.0265	3.07377	1.24891	25.4007	527.3	0.09907	0.09239	0.09626	0.10433
527.2	0.4589	3.49336	1.79179	25.7318	527.2	0.09933	0.09264	0.09651	0.10456
527.1	0.51484	3.84938	2.1696	25.7455	527.1	0.09956	0.09286	0.09674	0.1048
527	0.62405	4.76762	1.87035	26.4905	527	0.09976	0.09308	0.097	0.10508
526.9	1.11355	3.62589	2.20906	26.5829	526.9	0.09995	0.09328	0.09732	0.10539
526.8	0.84528	3.48389	2.35833	26.598	526.8	0.10011	0.09344	0.09761	0.10564
526.7	0.37135	3.49392	2.49181	26.4159	526.7	0.10029	0.09355	0.09792	0.10589
526.6	0.36051	3.46906	2.44559	25.7537	526.6	0.10047	0.09366	0.09817	0.10613
526.5	-0.28696	2.98128	2.23833	26.2233	526.5	0.10069	0.09382	0.09848	0.10648
526.4	-0.428	3.64163	2.40414	26.7601	526.4	0.10087	0.09397	0.09872	0.10674
526.3	0.03614	3.40835	2.06136	26.6855	526.3	0.10106	0.09416	0.09894	0.10694
526.2	0.04281	4.29838	2.40318	27.01	526.2	0.1013	0.09441	0.09917	0.10715
526.1	0.13611	4.70135	2.24923	26.5497	526.1	0.10153	0.09468	0.09945	0.10738
526	-0.11914	4.69339	2.11795	26.3916	526	0.10185	0.09499	0.09979	0.10765
525.9	-0.96377	4.5094	2.33175	26.3098	525.9	0.10216	0.09531	0.10007	0.10802
525.8	-1.87607	4.45821	2.35837	26.2713	525.8	0.10249	0.09557	0.10037	0.10835
525.7	-2.11872	4.4581	2.20315	25.6523	525.7	0.1028	0.09583	0.10059	0.1087
525.6	-2.50191	4.40843	2.13218	25.4521	525.6	0.10305	0.09607	0.10085	0.109
525.5	-2.20743	4.03808	2.45298	25.3994	525.5	0.10327	0.09623	0.10109	0.10933
525.4	-2.73053	4.19316	2.67654	25.0268	525.4	0.10349	0.09638	0.10135	0.10963
525.3	-2.44442	3.02801	2.45031	25.2623	525.3	0.10363	0.09655	0.10165	0.10988
525.2	-2.34455	3.21294	2.12062	25.8921	525.2	0.10376	0.09672	0.10193	0.11009
525.1	-2.12553	3.34141	2.59839	25.874	525.1	0.10395	0.09691	0.10218	0.11027
525	-1.12983	3.54162	2.66187	25.6175	525	0.10415	0.09715	0.10243	0.11042
524.9	-0.88495	3.98865	2.79065	25.9111	524.9	0.10442	0.09743	0.10271	0.11063
524.8	0.22856	4.01405	1.85893	25.7357	524.8	0.10475	0.09767	0.10298	0.11081
524.7	0.04157	4.0658	1.4972	26.4494	524.7	0.10513	0.09793	0.10323	0.111
524.6	0.02488	4.52313	2.09892	26.6312	524.6	0.10548	0.09822	0.10351	0.11123
524.5	0.19545	4.37824	1.54445	27.5873	524.5	0.10578	0.0985	0.10376	0.11149
524.4	-0.05572	5.12436	1.12799	28.0997	524.4	0.10612	0.09886	0.10406	0.11182
524.3	-0.000641731	5.14375	1.03564	28.3013	524.3	0.10639	0.0991	0.10433	0.11217
524.2	-0.58705	5.82151	0.46069	28.3766	524.2	0.10661	0.09931	0.10452	0.11253
524.1	0.07463	5.43246	0.73635	29.0702	524.1	0.10681	0.09956	0.10478	0.11288
524	0.73723	5.3056	0.57971	28.9422	524	0.10699	0.09975	0.10495	0.11318
523.9	0.76116	4.62452	0.71981	29.1753	523.9	0.10716	0.10001	0.10516	0.11351
523.8	1.08978	4.37367	0.56966	28.5331	523.8	0.10743	0.10026	0.10536	0.11377
523.7	1.10782	4.75418	0.28175	28.6322	523.7	0.1077	0.10051	0.10554	0.11399
523.6	0.91607	5.55439	-0.48949	29.0614	523.6	0.10797	0.10079	0.10578	0.11426
523.5	0.64789	5.64306	-0.80918	29.5657	523.5	0.10827	0.10107	0.10601	0.11455
523.4	0.44048	6.03947	-0.93397	30.3832	523.4	0.10854	0.10136	0.10621	0.11486
523.3	0.13457	6.25251	-0.52692	30.6807	523.3	0.10886	0.10167	0.10643	0.11518
523.2	0.72855	6.62314	-0.12531	30.8343	523.2	0.10911	0.10199	0.10668	0.11547
523.1	0.67124	5.95859	0.06625	30.7956	523.1	0.10939	0.10231	0.10688	0.11569
523	0.1201	5.84711	0.11279	30.5549	523	0.10964	0.10258	0.10711	0.11598
522.9	0.09493	5.64859	0.20108	30.2957	522.9	0.10992	0.10281	0.10733	0.1163
522.8	-0.35989	5.59213	-0.23809	30.9172	522.8	0.11017	0.10304	0.10754	0.11662
522.7	-0.09095	5.54707	-0.43837	31.193	522.7	0.11041	0.10325	0.10775	0.1169
522.6	0.58371	5.63418	-0.24376	31.5112	522.6	0.11066	0.10344	0.10795	0.1171
522.5	0.92928	5.03085	-0.48505	31.6139	522.5	0.11087	0.10362	0.10815	0.1173
522.4	1.18888	5.3692	-0.53401	31.8423	522.4	0.1111	0.10382	0.10841	0.11742
522.3	1.98593	5.45222	-0.28481	32.6529	522.3	0.1114	0.10403	0.10862	0.11759
522.2	2.07079	5.79841	-0.23844	32.1419	522.2	0.11162	0.10424	0.10885	0.11776
522.1	2.14207	5.41508	-0.16239	32.2343	522.1	0.11183	0.10451	0.10906	0.11795
522	1.68807	6.15421	-0.16354	32.2876	522	0.11206	0.10475	0.10925	0.11819
521.9	1.93178	5.92655	0.80087	31.7377	521.9	0.11228	0.10505	0.10945	0.11847
521.8	2.15948	5.68182	0.37351	31.5905	521.8	0.11255	0.1053	0.10969	0.11882
521.7	1.84813	5.75258	0.21981	31.998	521.7	0.11291	0.10561	0.10987	0.11919
521.6	1.85914	5.63132	0.71685	31.7764	521.6	0.11317	0.10592	0.11007	0.11957
521.5	1.04821	5.30768	1.40996	32.3814	521.5	0.11343	0.10621	0.11028	0.11996
521.4	1.05316	5.8806	1.55003	32.1262	521.4	0.11364	0.10647	0.11054	0.12033
521.3	1.21389	5.48162	1.42724	32.5418	521.3	0.11391	0.10675	0.1108	0.12061
521.2	1.71231	6.15487	1.99665	32.4654	521.2	0.1142	0.10698	0.11107	0.1209
521.1	1.99155	5.99622	2.40886	32.6205	521.1	0.1145	0.10718	0.11138	0.1212
521	2.03938	5.80825	2.97513	32.3336	521	0.11475	0.10741	0.1117	0.12151
520.9	2.40341	5.79764	2.4125	32.5709	520.9	0.115	0.10766	0.11198	0.12176
520.8	2.45907	5.81301	2.32751	31.9492	520.8	0.11524	0.10791	0.1123	0.12198
520.7	2.15532	5.9425	2.73852	31.8646	520.7	0.11556	0.10819	0.11266	0.12225
520.6	1.90091	6.32474	2.01064	32.0765	520.6	0.11593	0.10845	0.11298	0.12243
520.5	1.64692	6.89121	1.97179	31.9834	520.5	0.11631	0.10869	0.11327	0.12268
520.4	2.25158	6.35064	1.90759	32.0722	520.4	0.11666	0.1089	0.11357	0.12295
520.3	1.97204	6.66118	2.67771	31.8144	520.3	0.11699	0.10912	0.11381	0.12325
520.2	2.66665	6.66867	2.44745	31.7383	520.2	0.1173	0.10939	0.11404	0.12358
520.1	2.84132	5.71877	2.80795	31.1113	520.1	0.11763	0.1097	0.11429	0.12394
520	2.84243	5.39953	2.83041	31.8275	520	0.1179	0.11002	0.11455	0.12423
519.9	2.42484	4.75474	2.93492	31.674	519.9	0.11822	0.11033	0.11485	0.12453
519.8	2.83728	5.06007	2.77592	31.6283	519.8	0.1185	0.11062	0.11518	0.12493
519.7	3.11688	5.46336	3.02949	32.1041	519.7	0.11874	0.1109	0.11549	0.12523
519.6	2.8788	5.69042	2.64056	32.8594	519.6	0.119	0.1112	0.11583	0.12559
519.5	3.15466	6.42216	2.5411	33.2981	519.5	0.11934	0.11149	0.11617	0.12588
519.4	3.44269	6.37173	2.24347	33.3324	519.4	0.11967	0.11176	0.11646	0.12613
519.3	3.43809	5.93724	2.43262	33.2203	519.3	0.11999	0.11197	0.11675	0.1264
519.2	2.98486	6.639	2.00874	34.0192	519.2	0.12027	0.1122	0.11708	0.1267
519.1	2.87062	6.3851	2.02446	34.3537	519.1	0.12059	0.1124	0.11738	0.12702
519	2.57857	6.60692	1.19259	33.2264	519	0.12083	0.11265	0.11767	0.12731
518.9	2.08649	6.54637	0.12574	34.0083	518.9	0.12109	0.11295	0.11798	0.12766
518.8	2.11968	6.40284	-0.30563	34.5734	518.8	0.12143	0.11327	0.1183	0.12798
518.7	2.19368	7.03879	-0.33167	34.4778	518.7	0.12181	0.11358	0.11858	0.12826
518.6	2.46139	7.30313	-0.82913	34.5894	518.6	0.1222	0.1139	0.11882	0.12857
518.5	2.37523	7.772	-0.94501	35.1205	518.5	0.12255	0.1142	0.11906	0.12886
518.4	2.44236	8.26473	-0.68993	35.2094	518.4	0.12278	0.11451	0.11937	0.1291
518.3	2.03948	8.36702	-0.70933	35.3919	518.3	0.12297	0.11475	0.11973	0.12932
518.2	1.44981	8.90851	-0.81442	35.0607	518.2	0.12322	0.115	0.12009	0.1296
518.1	1.78846	8.74884	-0.76188	35.5074	518.1	0.12351	0.11526	0.12046	0.12983
518	2.16813	8.75226	-1.72834	34.8596	518	0.12378	0.11546	0.12084	0.13013
517.9	2.1054	8.31115	-1.80344	35.117	517.9	0.12402	0.11569	0.12117	0.13044
517.8	2.19345	7.68047	-2.11519	35.445	517.8	0.12423	0.11593	0.12147	0.13073
517.7	2.40122	7.73544	-2.60763	35.9603	517.7	0.12455	0.11626	0.12178	0.13099
517.6	1.8316	8.00066	-1.68667	36.3987	517.6	0.12486	0.11654	0.12213	0.13131
517.5	1.67459	8.16622	-2.10442	36.8263	517.5	0.1252	0.11681	0.12247	0.13162
517.4	1.48815	8.30253	-2.11371	37.5782	517.4	0.12545	0.11712	0.12277	0.13193
517.3	1.29241	8.94937	-1.5538	38.2837	517.3	0.12569	0.11743	0.12307	0.13231
517.2	1.5069	8.17642	-1.21648	39.1421	517.2	0.12585	0.11775	0.12339	0.1327
517.1	1.04046	8.44644	-1.17418	39.2104	517.1	0.12602	0.11805	0.12375	0.13309
517	1.26775	8.11657	-1.39922	39.3179	517	0.1262	0.11838	0.12411	0.13345
516.9	1.04013	8.34659	-1.51623	39.415	516.9	0.12644	0.11863	0.12444	0.1338
516.8	0.8346	9.38362	-1.2495	39.3914	516.8	0.12665	0.11891	0.12476	0.13408
516.7	1.32165	10.0857	-1.62894	39.3849	516.7	0.12695	0.11914	0.12505	0.13441
516.6	1.67893	9.39229	-2.23689	39.0403	516.6	0.12728	0.11941	0.12529	0.13473
516.5	1.57711	10.1705	-1.42635	39.4983	516.5	0.12763	0.1197	0.12555	0.13506
516.4	1.95165	10.1737	-1.54076	39.3654	516.4	0.12802	0.12	0.12582	0.13533
516.3	1.81141	9.18527	-1.77799	38.5906	516.3	0.12839	0.12032	0.12613	0.13561
516.2	2.33957	8.88629	-1.62211	38.2645	516.2	0.1287	0.1206	0.12645	0.13591
516.1	2.36713	8.48096	-1.34851	38.2627	516.1	0.12892	0.12092	0.12681	0.13618
516	2.27813	8.88715	-1.56675	37.4757	516	0.12907	0.12128	0.12717	0.13648
515.9	2.1948	9.12005	-1.34331	37.6268	515.9	0.12933	0.1217	0.12749	0.13677
515.8	2.50991	8.75737	-0.52208	37.3963	515.8	0.12955	0.12212	0.12783	0.13714
515.7	2.52111	8.90317	-0.13866	37.5498	515.7	0.12982	0.12253	0.12818	0.13752
515.6	2.80883	8.59915	0.09114	36.762	515.6	0.13011	0.12286	0.1285	0.13794
515.5	3.07549	8.86456	0.85315	36.5665	515.5	0.13041	0.12312	0.1288	0.1383
515.4	2.78634	8.5217	0.14404	36.7705	515.4	0.13069	0.12333	0.12913	0.13873
515.3	2.00811	8.68782	0.16669	36.9382	515.3	0.13101	0.12352	0.12951	0.13916
515.2	1.69209	7.91789	-0.10649	37.4492	515.2	0.13133	0.12371	0.12989	0.13955
515.1	1.54309	7.56086	0.37254	37.5519	515.1	0.13172	0.12387	0.13023	0.13996
515	1.44151	6.74178	0.44979	37.6554	515	0.13213	0.12404	0.13049	0.14037
514.9	1.5454	6.46888	0.63465	37.4584	514.9	0.13254	0.12425	0.13077	0.14073
514.8	2.01052	5.94389	0.89432	36.8703	514.8	0.1329	0.12451	0.131	0.1411
514.7	1.65115	5.93418	0.86192	37.0821	514.7	0.13322	0.12483	0.13129	0.14145
514.6	1.61275	6.04341	1.20065	37.4443	514.6	0.13354	0.12521	0.13158	0.14175
514.5	1.46971	5.92418	1.0636	36.2477	514.5	0.13382	0.12559	0.13188	0.14206
514.4	1.13274	6.20785	1.49918	35.405	514.4	0.13409	0.12593	0.13216	0.14239
514.3	0.83174	6.1733	1.23347	35.0838	514.3	0.13427	0.12626	0.13241	0.14268
514.2	1.00542	5.71208	1.10605	35.3723	514.2	0.1345	0.12658	0.13267	0.14297
514.1	1.60446	5.50519	1.15613	35.7163	514.1	0.13478	0.12684	0.13289	0.14327
514	2.03785	5.36411	1.12234	35.4228	514	0.13511	0.12702	0.13318	0.1436
513.9	1.72867	5.7502	1.3608	34.8932	513.9	0.1355	0.12728	0.13343	0.14386
513.8	2.01243	5.68838	1.23226	34.7391	513.8	0.13591	0.12753	0.1337	0.14413
513.7	1.91764	5.99739	0.93267	34.3326	513.7	0.13634	0.12777	0.13399	0.14446
513.6	1.62408	5.30657	0.77988	34.0598	513.6	0.13665	0.12798	0.13423	0.14468
513.5	2.19246	4.5668	0.41905	34.3249	513.5	0.13705	0.1283	0.13455	0.14494
513.4	1.99868	4.2304	0.47193	34.3022	513.4	0.13744	0.1286	0.1349	0.1452
513.3	2.25332	3.86788	0.82367	34.8614	513.3	0.13782	0.12886	0.13518	0.14543
513.2	1.80553	4.76311	0.56817	34.593	513.2	0.13811	0.12904	0.13542	0.14564
513.1	2.0972	4.78739	0.19475	35.4178	513.1	0.13839	0.12928	0.13564	0.14592
513	1.55086	4.40391	0.48969	34.8025	513	0.13862	0.12955	0.13584	0.14625
512.9	1.31648	4.57661	0.41436	35.3207	512.9	0.1389	0.12988	0.13604	0.14663
512.8	1.35638	4.4245	0.57244	35.4494	512.8	0.13922	0.13017	0.13627	0.14698
512.7	1.02877	4.42409	1.21779	36.5061	512.7	0.13964	0.1305	0.13653	0.14736
512.6	-0.07269	4.16821	1.24539	37.107	512.6	0.14008	0.13077	0.13685	0.14772
512.5	-0.33021	4.46824	1.68074	37.5605	512.5	0.1405	0.13104	0.13721	0.14811
512.4	-0.55893	4.9345	0.87522	38.1329	512.4	0.14101	0.13129	0.13752	0.14838
512.3	-0.76019	4.59715	1.06115	38.112	512.3	0.14147	0.13156	0.13787	0.14868
512.2	-0.74426	4.36407	1.05302	38.5567	512.2	0.14193	0.13186	0.13823	0.14898
512.1	-0.85024	4.67362	0.49683	39.0278	512.1	0.14233	0.1322	0.13858	0.1493
512	-1.15248	5.4721	1.2277	39.1851	512	0.14272	0.1326	0.1389	0.14958
511.9	-0.88404	5.36477	1.3038	38.6399	511.9	0.14296	0.13305	0.1392	0.14986
511.8	0.21887	5.31596	1.17465	38.9285	511.8	0.14318	0.13347	0.13952	0.15016
511.7	1.12355	5.6713	0.9055	38.925	511.7	0.14334	0.13392	0.13987	0.15041
511.6	1.21331	5.56183	0.25768	38.9171	511.6	0.14357	0.1344	0.1402	0.15064
511.5	1.64716	6.05117	-0.01669	39.3221	511.5	0.14381	0.13484	0.14052	0.15091
511.4	1.14608	5.86894	0.0477	39.6678	511.4	0.1441	0.13516	0.14086	0.1512
511.3	1.4095	6.36304	-0.02554	39.9681	511.3	0.14443	0.13541	0.14119	0.15148
511.2	1.65628	6.7881	-0.09	40.0708	511.2	0.14483	0.13564	0.1416	0.15183
511.1	1.93605	7.46233	0.21475	41.0605	511.1	0.14528	0.13589	0.14196	0.1522
511	2.49702	7.78607	0.56955	41.969	511	0.14572	0.13616	0.14235	0.15254
510.9	2.22313	7.52428	0.29047	40.7727	510.9	0.14623	0.13644	0.14274	0.15288
510.8	2.22606	7.97881	0.81682	40.7317	510.8	0.14671	0.13673	0.14308	0.15324
510.7	1.54383	9.125	0.98187	41.3719	510.7	0.14712	0.13712	0.14341	0.1536
510.6	1.65618	8.71801	0.75174	41.4254	510.6	0.14745	0.13753	0.14365	0.15392
510.5	1.16643	8.71974	0.25377	41.5874	510.5	0.14772	0.13793	0.14391	0.15428
510.4	1.51168	9.17766	0.26612	42.0985	510.4	0.14794	0.13833	0.14414	0.15459
510.3	1.78391	9.16467	0.9817	42.772	510.3	0.14812	0.13878	0.14443	0.15489
510.2	1.4657	9.59054	0.68536	43.0436	510.2	0.14836	0.13916	0.14471	0.15525
510.1	1.12522	9.81241	0.03018	43.8317	510.1	0.14859	0.13949	0.14506	0.15563
510	0.95318	9.32978	0.51356	43.6815	510	0.14888	0.13983	0.14546	0.15605
509.9	0.43975	8.57666	1.94197	43.7742	509.9	0.14917	0.14021	0.14592	0.15644
509.8	0.3874	8.74823	2.26185	43.7095	509.8	0.14956	0.14057	0.14639	0.15686
509.7	0.20056	8.98351	2.53866	43.9399	509.7	0.14993	0.14085	0.14684	0.15721
509.6	0.49357	9.03527	2.83829	44.9947	509.6	0.15031	0.1411	0.14728	0.15753
509.5	0.947	9.5122	2.68181	44.9287	509.5	0.15071	0.14135	0.1477	0.15783
509.4	0.79349	9.77896	2.51082	44.5653	509.4	0.15104	0.14166	0.14806	0.15806
509.3	1.35196	9.64513	1.94417	44.3088	509.3	0.15141	0.14201	0.14835	0.15834
509.2	1.46667	8.85673	1.67187	44.0721	509.2	0.15174	0.14236	0.14867	0.15864
509.1	1.50858	9.00156	1.31703	44.2051	509.1	0.15207	0.14271	0.14899	0.15895
509	1.60958	8.80935	1.39299	44.965	509	0.15233	0.14306	0.1493	0.15923
508.9	1.52593	9.30134	1.75421	44.6553	508.9	0.15259	0.1434	0.14963	0.15962
508.8	0.97305	8.94618	1.7848	45.1463	508.8	0.15282	0.14372	0.14995	0.15996
508.7	0.76635	8.43793	2.10166	44.219	508.7	0.15306	0.14402	0.15028	0.16033
508.6	1.17416	8.57972	1.842	44.4309	508.6	0.15339	0.14433	0.15057	0.16071
508.5	0.73822	8.76819	2.81938	44.549	508.5	0.15376	0.14465	0.15087	0.16106
508.4	0.04263	8.41943	1.2742	44.5052	508.4	0.1542	0.14501	0.15118	0.16139
508.3	0.51179	8.83223	2.37788	44.4057	508.3	0.15462	0.14525	0.15151	0.16172
508.2	0.01531	8.61346	1.73885	44.4883	508.2	0.15504	0.14556	0.15186	0.16205
508.1	0.36935	8.69757	2.14779	43.7732	508.1	0.15547	0.14591	0.15224	0.16238
508	0.56814	8.2081	1.95371	44.2859	508	0.15593	0.14627	0.15259	0.16273
507.9	0.08505	7.60199	1.67919	44.2072	507.9	0.15633	0.14666	0.15294	0.16308
507.8	-0.1838	6.80583	1.85236	44.8711	507.8	0.15668	0.14699	0.15327	0.16346
507.7	-0.89552	5.96394	1.07358	44.1913	507.7	0.15704	0.14735	0.15359	0.16387
507.6	-0.37484	5.66337	1.74905	45.2124	507.6	0.15739	0.14771	0.15394	0.16437
507.5	0.01922	5.56374	1.15842	45.1762	507.5	0.15767	0.14808	0.15427	0.16481
507.4	0.5036	4.89159	1.25081	44.7268	507.4	0.15806	0.14858	0.15478	0.16536
507.3	1.0284	4.09778	1.11999	44.575	507.3	0.15847	0.14891	0.15525	0.16573
507.2	0.73819	3.95616	0.61054	45.0861	507.2	0.15898	0.14929	0.15568	0.16599
507.1	-0.19905	4.27626	1.08677	44.9706	507.1	0.15953	0.14967	0.15611	0.16625
507	-0.12807	3.4852	0.90531	44.8776	507	0.16007	0.14995	0.15654	0.16645
506.9	-0.0414	3.38011	1.45357	45.0336	506.9	0.16057	0.15022	0.15688	0.16665
506.8	0.41694	3.09685	1.12051	43.6302	506.8	0.161	0.15055	0.15721	0.16693
506.7	1.16709	3.10773	1.11409	44.4282	506.7	0.16139	0.15095	0.1575	0.16726
506.6	0.72722	4.2601	0.16122	44.8564	506.6	0.16181	0.15128	0.15786	0.16771
506.5	1.08016	4.32559	-0.73897	45.1728	506.5	0.16215	0.15171	0.15818	0.16814
506.4	1.79334	4.04041	-1.5012	45.7349	506.4	0.16252	0.15213	0.15856	0.16858
506.3	1.28694	3.73872	-1.09198	44.6882	506.3	0.1629	0.15257	0.15891	0.16906
506.2	1.66834	3.7493	-1.35636	44.9458	506.2	0.16326	0.15296	0.15922	0.16955
506.1	1.83093	3.32459	-0.98084	45.3775	506.1	0.16371	0.15333	0.15953	0.17012
506	2.31201	3.95212	-0.88383	45.8623	506	0.16412	0.15366	0.15989	0.17059
505.9	2.08368	5.39894	-1.28773	46.0428	505.9	0.16466	0.15406	0.16037	0.17109
505.8	2.20615	5.50413	-0.52492	46.0416	505.8	0.16505	0.15438	0.16079	0.17143
505.7	2.22451	5.68854	-0.79845	45.7068	505.7	0.16546	0.15473	0.16116	0.17179
505.6	2.29211	5.45699	-0.82924	45.7694	505.6	0.16589	0.15502	0.16157	0.17209
505.5	3.01432	4.96698	-0.90986	46.4859	505.5	0.16636	0.15533	0.16196	0.17235
505.4	2.78311	4.07829	-1.3732	46.9039	505.4	0.16685	0.1557	0.1624	0.1727
505.3	2.38986	4.59535	-1.38979	47.4081	505.3	0.1673	0.15606	0.16284	0.17306
505.2	2.67848	4.27968	-1.05413	47.6831	505.2	0.16771	0.15642	0.16328	0.17357
505.1	2.54875	4.66754	-0.59692	48.0926	505.1	0.16807	0.15682	0.16371	0.17413
505	1.55493	4.95442	-1.22567	49.1692	505	0.16839	0.15722	0.16418	0.17469
504.9	2.46323	5.03106	-0.97447	49.8397	504.9	0.16867	0.15759	0.16457	0.17527
504.8	2.77403	5.36769	-1.34361	50.1303	504.8	0.16896	0.15793	0.16493	0.1758
504.7	3.20627	5.47457	-1.1515	50.3831	504.7	0.16927	0.15832	0.16536	0.17632
504.6	2.93208	5.89856	-0.63113	51.6802	504.6	0.16969	0.1588	0.16587	0.17687
504.5	3.36066	6.03033	-0.97488	51.4882	504.5	0.17004	0.15916	0.16622	0.17721
504.4	3.11029	6.60616	-1.83868	52.3822	504.4	0.17045	0.15948	0.16657	0.17752
504.3	3.40606	6.72696	-2.14091	53.1326	504.3	0.17089	0.15984	0.16691	0.17775
504.2	2.58826	6.78941	-1.79956	54.4383	504.2	0.1714	0.16017	0.16729	0.17798
504.1	3.26782	6.77455	-1.66491	54.1501	504.1	0.17188	0.1605	0.16764	0.17827
504	2.9225	6.52109	-1.84614	54.0173	504	0.17234	0.16082	0.16802	0.17867
503.9	3.94478	7.10899	-0.80437	54.0663	503.9	0.17273	0.16114	0.16845	0.17914
503.8	4.42446	7.37102	-1.35661	54.921	503.8	0.17307	0.16148	0.16885	0.17969
503.7	4.41335	7.81293	-1.0314	55.316	503.7	0.1734	0.16191	0.16929	0.18037
503.6	4.31022	8.01824	-1.56088	55.6664	503.6	0.17369	0.16227	0.16983	0.18099
503.5	3.91745	8.53163	-0.41123	56.0488	503.5	0.17405	0.16257	0.17036	0.1816
503.4	3.98226	9.05644	-0.53517	56.1772	503.4	0.17443	0.16291	0.17086	0.18207
503.3	4.23967	8.9628	-0.39142	55.2022	503.3	0.17482	0.1632	0.17127	0.18238
503.2	3.89804	8.45716	-0.19921	55.3746	503.2	0.17525	0.16348	0.1716	0.18266
503.1	3.63906	8.70551	-0.04304	55.0167	503.1	0.17572	0.16377	0.17193	0.18288
503	4.54484	9.67077	-0.00608	55.5376	503	0.17617	0.16411	0.17219	0.18306
502.9	3.92988	9.59274	-0.31617	55.9526	502.9	0.17654	0.16443	0.17249	0.18327
502.8	3.47814	9.31043	-1.58737	55.731	502.8	0.17688	0.1648	0.17286	0.18356
502.7	4.06	8.69942	-1.07989	56.0569	502.7	0.17717	0.16516	0.17322	0.18389
502.6	4.60074	7.88	-1.06329	56.2972	502.6	0.17743	0.16554	0.17363	0.18436
502.5	5.0974	7.58915	-0.85465	56.292	502.5	0.17769	0.1659	0.17397	0.18487
502.4	5.18563	6.99622	-0.85443	56.238	502.4	0.17804	0.16626	0.17439	0.18538
502.3	6.69282	6.75205	-0.84095	57.0298	502.3	0.17843	0.1667	0.1748	0.1859
502.2	6.20276	6.5273	-0.10647	56.0032	502.2	0.1789	0.16723	0.17528	0.18652
502.1	6.95459	7.24764	-0.16064	56.5107	502.1	0.1793	0.16758	0.17576	0.18696
502	8.07635	6.81636	0.65358	56.7656	502	0.17978	0.16796	0.1762	0.1873
501.9	7.51934	7.26333	0.81254	57.3609	501.9	0.18027	0.16832	0.1766	0.18755
501.8	7.86855	5.81758	1.02583	57.3904	501.8	0.18074	0.1687	0.17696	0.1878
501.7	7.92627	5.88784	1.0954	57.647	501.7	0.18121	0.16914	0.17724	0.18804
501.6	8.31721	5.9946	0.98756	57.9225	501.6	0.18165	0.16963	0.17759	0.18833
501.5	7.86246	6.32829	1.17305	58.3071	501.5	0.18204	0.17013	0.1779	0.18862
501.4	8.18318	6.29885	1.98022	57.6838	501.4	0.18239	0.17058	0.17816	0.18895
501.3	7.92165	6.71947	1.91325	57.3141	501.3	0.18263	0.17094	0.17847	0.18935
501.2	7.80415	6.60867	1.91644	57.8512	501.2	0.18291	0.17128	0.17885	0.1898
501.1	8.09482	6.12535	1.67837	56.8896	501.1	0.18314	0.17162	0.17927	0.19031
501	7.83245	6.1534	1.65812	55.7169	501	0.18335	0.17197	0.17965	0.19082
500.9	8.67292	6.17558	1.52947	55.2356	500.9	0.18361	0.17232	0.18011	0.19137
500.8	8.76433	6.35339	1.47964	55.538	500.8	0.18391	0.17271	0.18059	0.19177
500.7	9.00521	6.55724	2.0774	56.3691	500.7	0.18427	0.17315	0.1811	0.19218
500.6	8.46013	6.05655	1.31107	56.7545	500.6	0.18471	0.1736	0.18156	0.19256
500.5	9.367	5.50163	1.68853	56.4854	500.5	0.1852	0.17403	0.182	0.19287
500.4	9.21885	5.65401	2.45753	56.0867	500.4	0.18571	0.17446	0.18237	0.1931
500.3	9.01241	6.21131	2.85713	56.6155	500.3	0.18616	0.17492	0.18268	0.19337
[truncated: 1,503 more rows]
