# Supplementary material for: Achieving Robust Cholesteric Liquid Crystal Polymer Networks with High Luminescence Dissymmetry Factor
Source: Research Square preprint supplement (doi:10.21203/rs.3.rs-7436711/v1), 2025-09-17
Supplement: Supplementary file 16 [file ef8060adca3ffb15789af4cf.xlsx]

## Sheet: Sheet1
	FC1-1st scan		FC1-2nd scan			FC6-1st scan		FC6-2nd scan
35.0253	-0.50263	35.0096	-0.46276		35.5232	-0.39882	35.0285	-0.35912
36.0245	-0.50203	36.0037	-0.46117		37.0237	-0.40357	36.021	-0.35733
37.025	-0.50247	36.9979	-0.4603		38.5254	-0.40692	37.014	-0.35732
38.026	-0.50381	37.9922	-0.45997		40.0273	-0.40627	38.008	-0.35718
39.0267	-0.50231	38.9879	-0.46078		41.526	-0.40145	39.0031	-0.35885
40.0269	-0.50314	39.9853	-0.4608		43.0263	-0.39756	40.0002	-0.36087
41.027	-0.5028	40.9839	-0.46107		44.5265	-0.39592	40.9988	-0.36188
42.027	-0.50273	41.9823	-0.46079		46.0255	-0.39469	41.998	-0.36229
43.0271	-0.50317	42.9811	-0.46145		47.5259	-0.39672	42.9974	-0.36378
44.027	-0.50413	43.9809	-0.46272		49.0255	-0.3995	43.9969	-0.36543
45.0267	-0.50303	44.981	-0.46303		50.5247	-0.40237	44.9962	-0.36712
46.0269	-0.50374	45.9813	-0.46375		52.0248	-0.40724	45.9965	-0.36939
47.0273	-0.50354	46.9815	-0.46342		53.5254	-0.41312	46.9975	-0.37002
48.0272	-0.50413	47.9822	-0.46509		55.025	-0.41892	47.998	-0.37248
49.0272	-0.50368	48.983	-0.46577		56.5254	-0.42731	48.9983	-0.37353
50.027	-0.50336	49.9834	-0.46685		58.0257	-0.43645	49.9981	-0.37658
51.0267	-0.5033	50.9833	-0.46802		59.5247	-0.44802	50.9979	-0.37858
52.0267	-0.5022	51.9831	-0.46753		61.0241	-0.46335	51.9986	-0.38022
53.027	-0.50266	52.9835	-0.46956		62.5241	-0.48353	52.9993	-0.38191
54.0275	-0.503	53.9843	-0.46983		64.0225	-0.50923	53.9995	-0.38343
55.0277	-0.50243	54.9847	-0.47069		65.5238	-0.54338	54.9999	-0.38513
56.0269	-0.50251	55.9846	-0.47043		67.0238	-0.58798	56.0007	-0.38711
57.0262	-0.50207	56.9848	-0.47101		68.5234	-0.64839	57.0016	-0.38914
58.0263	-0.50409	57.9857	-0.47222		70.0238	-0.73381	58.0017	-0.39043
59.0266	-0.50301	58.9862	-0.47295		71.5238	-0.85746	59.0017	-0.39241
60.0267	-0.50167	59.9864	-0.47266		73.0229	-1.03717	60.0015	-0.39469
61.0267	-0.50163	60.9865	-0.47287		74.5225	-1.26246	61.0017	-0.39482
62.0264	-0.5021	61.9864	-0.47334		76.024	-1.29337	62.0023	-0.39663
63.0264	-0.50232	62.9869	-0.47459		77.5238	-0.98089	63.0028	-0.39735
64.0271	-0.50177	63.9874	-0.47445		79.0232	-0.6198	64.0035	-0.39891
65.0266	-0.5016	64.9879	-0.47438		80.5236	-0.46371	65.0041	-0.39955
66.0261	-0.50144	65.9881	-0.47514		82.0235	-0.42976	66.0039	-0.4002
67.026	-0.50153	66.9877	-0.47664		83.5226	-0.42417	67.004	-0.40117
68.0262	-0.50085	67.9879	-0.47659		85.0234	-0.42328	68.004	-0.40082
69.0264	-0.50121	68.9884	-0.47618		86.5233	-0.42247	69.0039	-0.4011
70.0264	-0.50183	69.9884	-0.47734		88.0232	-0.42233	70.0046	-0.40213
71.0263	-0.50129	70.9885	-0.47705		89.523	-0.42229	71.0053	-0.40337
72.0262	-0.50217	71.9887	-0.47725		91.023	-0.42249	72.0057	-0.40302
73.0264	-0.50111	72.9888	-0.47684		92.5222	-0.42128	73.0055	-0.40264
74.0265	-0.50109	73.9889	-0.47711		94.0228	-0.42174	74.005	-0.40327
75.0266	-0.50055	74.989	-0.47732		95.523	-0.42162	75.005	-0.40385
76.0265	-0.49975	75.9889	-0.4785		97.0225	-0.4215	76.0051	-0.40339
77.0256	-0.49817	76.9893	-0.47802		98.5232	-0.42131	77.0056	-0.40439
78.0252	-0.49946	77.99	-0.47789		100.023	-0.42094	78.0063	-0.40415
79.0255	-0.49827	78.9899	-0.47866		101.522	-0.41991	79.0062	-0.40309
80.0262	-0.49904	79.9894	-0.4786		103.023	-0.42031	80.0057	-0.40329
81.0267	-0.49838	80.9899	-0.47863		104.522	-0.42021	81.0058	-0.4048
82.0265	-0.49655	81.9903	-0.47866		106.022	-0.42019	82.0065	-0.40435
83.0261	-0.49615	82.9898	-0.47899		107.523	-0.42001	83.007	-0.40455
84.0257	-0.49537	83.9902	-0.47871		109.022	-0.41975	84.007	-0.40392
85.026	-0.49562	84.9908	-0.47986		110.522	-0.41874	85.0068	-0.40331
86.0262	-0.49458	85.9907	-0.48026		112.023	-0.41873	86.0065	-0.4047
87.026	-0.49458	86.9903	-0.47955		113.523	-0.41814	87.0064	-0.40385
88.0262	-0.49562	87.9899	-0.47998		115.022	-0.41738	88.0068	-0.40499
89.0266	-0.49354	88.9897	-0.48032		116.522	-0.41638	89.0073	-0.40416
90.0267	-0.49367	89.9904	-0.48162		118.022	-0.41596	90.0067	-0.40447
91.0263	-0.49393	90.9914	-0.48147		119.522	-0.4158	91.0066	-0.40453
92.0254	-0.49381	91.9914	-0.48025		121.022	-0.41506	92.007	-0.40371
93.0255	-0.49408	92.9908	-0.48098		122.522	-0.41372	93.0073	-0.40469
94.0259	-0.49409	93.9904	-0.48166		124.022	-0.41382	94.0074	-0.4036
95.0256	-0.49384	94.9907	-0.48146		125.523	-0.41317	95.0075	-0.40418
96.0257	-0.49346	95.9911	-0.48264		127.023	-0.41268	96.0079	-0.4042
97.0262	-0.49452	96.9909	-0.48195		128.522	-0.41169	97.0078	-0.40455
98.0263	-0.49401	97.991	-0.48173		130.022	-0.4113	98.0075	-0.40419
99.0266	-0.49481	98.991	-0.48256		131.522	-0.41082	99.0074	-0.4031
100.026	-0.49392	99.9909	-0.4826		133.022	-0.41018	100.007	-0.40329
101.025	-0.49498	100.991	-0.48309		134.523	-0.41013	101.007	-0.40526
102.025	-0.49487	101.991	-0.48411		136.022	-0.40839	102.007	-0.40329
103.026	-0.49477	102.991	-0.48367		137.521	-0.4092	103.007	-0.40446
104.026	-0.49453	103.991	-0.48469		139.021	-0.40814	104.008	-0.40436
105.026	-0.49495	104.991	-0.48391		140.522	-0.4075	105.008	-0.403
106.026	-0.49498	105.992	-0.48451		142.022	-0.40602	106.007	-0.40368
107.026	-0.4958	106.992	-0.48341		143.522	-0.40437	107.008	-0.40407
108.026	-0.49661	107.991	-0.48474		145.022	-0.40246	108.008	-0.40515
109.026	-0.49639	108.991	-0.48547		146.522	-0.40141	109.009	-0.40501
110.026	-0.49629	109.991	-0.48538		148.022	-0.40079	110.008	-0.40229
111.025	-0.49633	110.991	-0.4868		149.522	-0.39923	111.007	-0.40297
112.025	-0.49702	111.991	-0.48664		151.022	-0.39681	112.007	-0.40398
113.025	-0.49824	112.992	-0.48675		152.522	-0.39542	113.008	-0.40421
114.026	-0.49815	113.992	-0.48566		154.021	-0.39223	114.008	-0.40411
115.026	-0.49925	114.991	-0.48613		155.522	-0.38981	115.008	-0.40413
116.026	-0.50165	115.991	-0.4867		157.021	-0.38611	116.008	-0.4039
117.026	-0.5038	116.992	-0.48752		158.522	-0.38275	117.008	-0.40345
118.026	-0.50897	117.992	-0.48666		160.022	-0.3781	118.008	-0.40375
119.026	-0.51296	118.992	-0.4874		161.522	-0.37421	119.008	-0.40447
120.025	-0.52194	119.992	-0.48785		163.022	-0.36895	120.009	-0.40463
121.025	-0.53172	120.992	-0.48861		164.522	-0.36317	121.008	-0.40302
122.025	-0.54597	121.992	-0.48883		166.022	-0.35772	122.008	-0.40376
123.026	-0.56759	122.992	-0.48944		167.522	-0.35098	123.008	-0.40429
124.025	-0.59619	123.992	-0.48904		169.023	-0.34397	124.008	-0.40407
125.025	-0.64033	124.992	-0.48872		170.522	-0.33635	125.008	-0.40411
126.025	-0.71527	125.992	-0.48958		172.021	-0.32829	126.008	-0.40521
127.025	-0.85263	126.992	-0.48881		173.522	-0.31841	127.008	-0.40418
128.025	-1.11696	127.991	-0.48972		175.022	-0.30885	128.008	-0.40369
129.024	-1.66242	128.991	-0.49041		176.521	-0.29773	129.008	-0.40428
130.024	-3.0031	129.992	-0.49062		178.022	-0.28512	130.008	-0.40506
131.026	-1.98579	130.992	-0.49044		179.522	-0.27058	131.008	-0.40471
132.027	-0.8805	131.992	-0.49043		181.021	-0.25403	132.008	-0.40596
133.026	-0.58999	132.991	-0.49174		182.521	-0.23685	133.009	-0.40567
134.026	-0.51637	133.991	-0.49197		184.021	-0.22024	134.009	-0.40524
135.025	-0.4939	134.991	-0.4932		185.522	-0.21014	135.008	-0.40472
136.025	-0.48949	135.992	-0.4922		187.022	-0.1995	136.008	-0.40679
137.025	-0.48639	136.992	-0.49325		188.521	-0.18971	137.008	-0.40581
138.025	-0.4841	137.992	-0.49369		190.022	-0.17729	138.008	-0.40567
139.025	-0.48219	138.992	-0.49347		191.521	-0.16127	139.008	-0.40631
140.025	-0.47989	139.992	-0.49375		193.021	-0.13798	140.008	-0.40627
141.025	-0.47733	140.992	-0.49346		194.521	-0.11518	141.007	-0.40645
142.026	-0.47529	141.992	-0.49329		196.021	-0.09233	142.007	-0.40665
143.025	-0.47153	142.991	-0.49363		197.521	-0.04896	143.008	-0.40719
144.025	-0.4695	143.992	-0.49478		199.021	-0.01523	144.009	-0.40724
145.025	-0.46706	144.992	-0.49578		200.521	-0.03005	145.009	-0.40744
146.025	-0.46264	145.992	-0.49483		202.021	-0.06141	146.008	-0.4081
147.025	-0.45927	146.991	-0.4949		203.521	-0.09335	147.008	-0.40786
148.025	-0.45591	147.991	-0.49594		205.021	-0.12605	148.007	-0.40833
149.025	-0.4536	148.991	-0.49617		206.521	-0.15582	149.008	-0.40908
150.024	-0.44917	149.992	-0.49703		208.022	-0.18273	150.008	-0.40944
151.025	-0.44633	150.992	-0.49694		209.521	-0.20467	151.009	-0.40895
152.025	-0.44243	151.992	-0.49676		211.021	-0.22436	152.008	-0.40904
153.025	-0.44185	152.992	-0.49649		212.52	-0.24091	153.008	-0.40946
154.025	-0.43914	153.991	-0.49775		214.021	-0.25598	154.008	-0.41028
155.024	-0.43976	154.991	-0.49855		215.521	-0.28463	155.008	-0.41061
156.025	-0.43958	155.991	-0.49843		217.021	-0.28569	156.008	-0.41073
157.025	-0.43953	156.991	-0.49741		218.521	-0.29154	157.008	-0.40994
158.025	-0.44042	157.991	-0.49941		220.021	-0.299	158.008	-0.41109
159.025	-0.44131	158.991	-0.49825		221.521	-0.31297	159.008	-0.41118
160.025	-0.44153	159.991	-0.49979		223.021	-0.313	160.008	-0.4118
161.025	-0.44149	160.992	-0.49939		224.521	-0.32221	161.009	-0.41118
162.025	-0.44079	161.991	-0.50011		226.021	-0.32599	162.008	-0.41288
163.025	-0.43942	162.991	-0.50083		227.521	-0.33104	163.009	-0.41334
164.025	-0.43684	163.992	-0.50015		229.021	-0.33002	164.009	-0.41283
165.025	-0.43213	164.992	-0.5011		230.521	-0.3333	165.008	-0.41358
166.025	-0.42741	165.992	-0.50146		232.021	-0.33291	166.008	-0.41326
167.025	-0.42136	166.992	-0.50191		233.521	-0.33298	167.008	-0.41371
168.025	-0.41516	167.992	-0.50233		235.021	-0.33224	168.008	-0.41398
169.025	-0.40856	168.992	-0.5029		236.521	-0.33078	169.008	-0.41339
170.025	-0.40048	169.991	-0.50293		238.021	-0.32869	170.008	-0.41529
171.025	-0.39185	170.99	-0.50314		239.521	-0.32606	171.007	-0.41525
172.025	-0.38295	171.991	-0.50426		241.021	-0.32288	172.007	-0.41584
173.025	-0.37499	172.992	-0.50157		242.521	-0.31997	173.008	-0.41678
174.025	-0.36648	173.991	-0.50232		244.021	-0.32256	174.008	-0.41698
175.025	-0.35715	174.991	-0.50378		245.521	-0.32399	175.008	-0.4165
176.025	-0.34822	175.992	-0.50375		247.02	-0.34652	176.008	-0.41651
177.025	-0.3417	176.992	-0.50475		248.521	-0.33357	177.009	-0.41687
178.025	-0.33155	177.992	-0.50467		250.021	-0.32377	178.009	-0.4177
179.024	-0.3238	178.992	-0.50543				179.008	-0.41727
180.024	-0.31659	179.991	-0.50455				180.008	-0.41883
181.025	-0.30897	180.991	-0.50681				181.008	-0.41784
182.025	-0.3008	181.991	-0.50599				182.008	-0.41871
183.024	-0.29425	182.991	-0.50679				183.008	-0.41987
184.024	-0.28984	183.991	-0.50739				184.008	-0.42063
185.025	-0.28408	184.991	-0.50788				185.008	-0.42092
186.025	-0.27805	185.991	-0.50874				186.007	-0.42158
187.025	-0.27336	186.991	-0.50883				187.008	-0.42079
188.025	-0.26988	187.991	-0.50906				188.008	-0.42266
189.025	-0.26586	188.991	-0.50956				189.007	-0.42302
190.025	-0.26468	189.991	-0.51015				190.008	-0.42307
191.025	-0.26215	190.991	-0.51122				191.008	-0.42363
192.024	-0.26259	191.991	-0.51103				192.008	-0.42539
193.024	-0.26358	192.992	-0.51158				193.008	-0.42543
194.025	-0.26552	193.992	-0.51157				194.008	-0.42689
195.024	-0.26678	194.991	-0.51271				195.008	-0.42767
196.025	-0.26995	195.991	-0.51324				196.008	-0.42691
197.025	-0.27326	196.991	-0.51393				197.007	-0.42851
198.025	-0.27807	197.991	-0.51524				198.008	-0.42762
199.025	-0.28166	198.991	-0.51471				199.008	-0.42847
200.025	-0.28852	199.991	-0.51364				200.008	-0.42964
201.025	-0.29376	200.991	-0.51533				201.007	-0.43061
202.025	-0.29887	201.991	-0.51694				202.008	-0.43087
203.025	-0.30425	202.992	-0.51788				203.008	-0.43123
204.025	-0.31197	203.992	-0.51741				204.008	-0.43141
205.024	-0.31942	204.991	-0.51795				205.007	-0.43266
206.024	-0.32593	205.99	-0.51827				206.007	-0.43577
207.024	-0.33245	206.991	-0.52054				207.008	-0.43515
208.024	-0.34034	207.992	-0.52157				208.008	-0.43522
209.024	-0.34687	208.992	-0.52115				209.007	-0.43706
210.025	-0.35369	209.991	-0.52165				210.008	-0.43751
211.024	-0.35942	210.991	-0.52392				211.008	-0.43859
212.025	-0.36654	211.991	-0.52333				212.008	-0.43838
213.025	-0.37366	212.991	-0.52352				213.007	-0.43956
214.024	-0.37983	213.99	-0.52466				214.008	-0.44104
215.024	-0.38669	214.991	-0.52619				215.007	-0.44091
216.024	-0.39219	215.991	-0.52674				216.007	-0.44236
217.025	-0.39853	216.992	-0.52569				217.008	-0.44286
218.025	-0.40267	217.992	-0.52648				218.008	-0.44473
219.024	-0.40806	218.992	-0.52507				219.008	-0.44507
220.024	-0.41428	219.991	-0.52718				220.007	-0.44517
221.024	-0.41997	220.991	-0.52798				221.007	-0.44661
222.025	-0.42593	221.99	-0.52817				222.007	-0.44748
223.025	-0.42818	222.99	-0.5304				223.008	-0.44852
224.024	-0.43388	223.99	-0.53025				224.008	-0.44791
225.024	-0.43753	224.989	-0.53079				225.008	-0.4494
226.024	-0.44089	225.99	-0.53154				226.008	-0.45111
227.025	-0.44538	226.992	-0.53346				227.007	-0.45149
228.025	-0.44807	227.992	-0.53331				228.008	-0.45318
229.025	-0.45257	228.991	-0.53298				229.008	-0.45437
230.025	-0.45541	229.991	-0.53502				230.008	-0.45521
231.025	-0.45769	230.991	-0.53442				231.007	-0.45574
232.024	-0.4611	231.991	-0.53588				232.007	-0.4573
233.023	-0.46409	232.991	-0.53604				233.007	-0.45684
234.024	-0.46737	233.991	-0.5372				234.007	-0.45868
235.024	-0.47038	234.991	-0.53781				235.007	-0.45983
236.024	-0.47158	235.991	-0.5387				236.007	-0.46023
237.024	-0.4725	236.991	-0.53903				237.007	-0.46078
238.025	-0.47482	237.99	-0.54127				238.007	-0.46308
239.025	-0.47617	238.991	-0.54143				239.008	-0.46346
240.024	-0.47738	239.991	-0.54337				240.007	-0.46484
241.024	-0.48042	240.991	-0.54263				241.007	-0.46437
242.024	-0.48122	241.99	-0.54344				242.007	-0.46661
243.023	-0.48104	242.991	-0.54399				243.008	-0.46799
244.023	-0.48269	243.991	-0.54464				244.008	-0.46869
245.023	-0.48321	244.991	-0.54607				245.008	-0.46987
246.023	-0.48445	245.99	-0.54767				246.007	-0.47138
247.024	-0.48568	246.991	-0.54794				247.007	-0.47291
248.025	-0.48551	247.99	-0.54912				248.007	-0.47462
249.025	-0.48464	248.99	-0.55035				249.007	-0.47816
250.024	-0.48518	249.991	-0.55077				250.007	-0.48085
		250.99	-0.55153
