# Supplementary material for: Achieving Robust Cholesteric Liquid Crystal Polymer Networks with High Luminescence Dissymmetry Factor
Source: Research Square preprint supplement (doi:10.21203/rs.3.rs-7436711/v1), 2025-09-17
Supplement: Supplementary file 17 [file f0eb55addfcb10e36e6751ea.xlsx]

## Sheet: Sheet1
	PC6-1st scan		PC6-2nd scan
35.5273	-0.42549	35.0556	-0.4195
37.0275	-0.42613	36.5443	-0.40911
38.5288	-0.42582	38.0343	-0.36549
40.0297	-0.42573	39.5287	-0.24239
41.5294	-0.42415	41.0252	0.03119
43.0298	-0.42332	42.5241	-0.12285
44.5309	-0.42313	44.0236	-0.28983
46.0303	-0.42284	45.5234	-0.35756
47.5292	-0.42191	47.0238	-0.37915
49.0298	-0.42258	48.525	-0.38655
50.5294	-0.42229	50.0249	-0.38878
52.0297	-0.42074	51.5255	-0.38968
53.5292	-0.42163	53.0269	-0.39181
55.0295	-0.42029	54.5266	-0.39281
56.5288	-0.42002	56.0269	-0.39346
58.0288	-0.42017	57.5283	-0.39584
59.5289	-0.42022	59.0291	-0.39539
61.0287	-0.41975	60.5295	-0.39642
62.5293	-0.42002	62.0293	-0.39688
64.0298	-0.41944	63.53	-0.3978
65.5292	-0.41929	65.03	-0.39842
67.0281	-0.41904	66.5314	-0.40034
68.528	-0.41953	68.031	-0.40077
70.028	-0.42024	69.5318	-0.40098
71.5287	-0.42043	71.032	-0.40238
73.0294	-0.42114	72.5317	-0.40352
74.529	-0.42069	74.0317	-0.40473
76.0275	-0.4211	75.5319	-0.40581
77.5272	-0.42161	77.0328	-0.40685
79.0278	-0.42149	78.5333	-0.40812
80.5283	-0.42052	80.0324	-0.40876
82.0276	-0.41966	81.5322	-0.41029
83.528	-0.41955	83.0328	-0.41025
85.0285	-0.42083	84.5334	-0.41089
86.5277	-0.42168	86.0344	-0.40983
88.0276	-0.42265	87.5345	-0.40733
89.5273	-0.42383	89.034	-0.40581
91.0277	-0.42565	90.5336	-0.40371
92.5277	-0.42727	92.0336	-0.40407
94.0272	-0.42921	93.5335	-0.40354
95.5277	-0.43126	95.0334	-0.40552
97.0275	-0.4347	96.534	-0.40844
98.5274	-0.43815	98.0342	-0.41148
100.027	-0.44332	99.534	-0.41431
101.528	-0.44742	101.035	-0.41879
103.028	-0.4541	102.535	-0.42241
104.527	-0.45929	104.034	-0.42697
106.027	-0.46791	105.535	-0.4325
107.527	-0.47793	107.035	-0.43798
109.027	-0.48893	108.534	-0.44446
110.528	-0.50562	110.034	-0.4524
112.027	-0.52287	111.535	-0.46093
113.527	-0.54229	113.035	-0.46906
115.028	-0.56462	114.535	-0.47956
116.528	-0.58537	116.035	-0.48875
118.027	-0.59679	117.535	-0.49936
119.526	-0.592	119.036	-0.51023
121.027	-0.54957	120.536	-0.51926
122.528	-0.4602	122.035	-0.52582
124.028	-0.43134	123.535	-0.52725
125.527	-0.46116	125.035	-0.52693
127.027	-0.5049	126.536	-0.53008
128.527	-0.54805	128.036	-0.53842
130.028	-0.60106	129.535	-0.54502
131.527	-0.6727	131.035	-0.53912
133.027	-0.68697	132.535	-0.51259
134.527	-0.64238	134.034	-0.44951
136.027	-0.52953	135.535	-0.4
137.527	-0.45648	137.035	-0.39056
139.027	-0.42587	138.535	-0.38869
140.527	-0.41277	140.035	-0.38902
142.027	-0.40704	141.536	-0.38907
143.526	-0.40357	143.035	-0.38802
145.027	-0.40379	144.535	-0.3887
146.527	-0.40086	146.035	-0.3879
148.026	-0.39968	147.534	-0.38734
149.526	-0.3974	149.035	-0.38669
151.027	-0.39611	150.535	-0.3859
152.527	-0.39308	152.034	-0.38564
154.027	-0.39178	153.535	-0.38534
155.527	-0.39071	155.034	-0.38392
157.026	-0.38855	156.535	-0.38425
158.527	-0.38671	158.035	-0.38359
160.027	-0.38706	159.536	-0.38297
161.527	-0.3849	161.035	-0.38277
163.027	-0.38471	162.535	-0.38379
164.527	-0.38364	164.035	-0.38303
166.027	-0.38301	165.535	-0.38249
167.527	-0.38162	167.035	-0.38271
169.027	-0.38034	168.535	-0.38213
170.527	-0.37917	170.035	-0.38186
172.027	-0.37844	171.535	-0.38158
173.526	-0.37727	173.035	-0.38133
175.027	-0.37731	174.534	-0.38098
176.527	-0.37669	176.035	-0.38113
178.027	-0.37597	177.535	-0.38067
179.526	-0.37536	179.035	-0.38003
181.026	-0.37508	180.534	-0.37995
182.526	-0.3748	182.035	-0.37897
184.026	-0.3743	183.535	-0.38008
185.527	-0.37325	185.035	-0.37937
187.026	-0.37387	186.534	-0.38015
188.526	-0.3736	188.035	-0.37899
190.026	-0.37455	189.535	-0.37907
191.526	-0.3744	191.034	-0.37859
193.027	-0.37447	192.535	-0.37989
194.527	-0.37377	194.034	-0.37912
196.026	-0.37429	195.534	-0.37938
197.526	-0.37492	197.035	-0.37985
199.026	-0.37489	198.535	-0.37893
200.342	-0.40168	200.021	-0.37903
